# Supplementary material for: Optimization of Protein Isolation and Label-Free Quantitative Proteomic Analysis in Four Different Tissues of Korean Ginseng
Source: Plants (Basel). 2021 Jul 9;10(7):1409. doi: 10.3390/plants10071409 (PMC8309323; doi:10.3390/plants10071409)
Supplement: Supplementary file 1 [file plants-10-01409-s001.zip]

Archive with 6 entries (6 files):
- Figure S1 and S2.pdf
- Table S1.xlsx
- Table S2.xlsx
- Table S3.xlsx
- Table S4.xlsx
- Table S5.xlsx
