# Supplementary material for: Optimization of Protein Isolation and Label-Free Quantitative Proteomic Analysis in Four Different Tissues of Korean Ginseng
Source: Plants (Basel). 2021 Jul 9;10(7):1409. doi: 10.3390/plants10071409 (PMC8309323; doi:10.3390/plants10071409)
Supplement: Supplementary file 1 [file plants-10-01409-s001.zip › Table S1.xlsx]

## Sheet: Sample info
Table 1. Sample infromation
Replicates	Sample Info	Number of peptides	Number of unique peptides	Sequence coverage (%)
Replicates_1	TCA/Acetone	20133	7868	13.13
	TCA/Acetone-MeOH/Chloroform	22712	9003	15.09
	Phenol-TCA/Acetone	22406	7933	16.38
	Phenol-MeOH/Chloroform	22382	8945	15.21
Replicates_2	TCA/Acetone	20676	8976	13.38
	TCA/Acetone-MeOH/Chloroform	22598	8956	14.99
	Phenol-TCA/Acetone	22471	7946	16.41
	Phenol-MeOH/Chloroform	22491	9013	15.28
Replicates_3	TCA/Acetone	20340	7923	13.21
	TCA/Acetone-MeOH/Chloroform	22345	8797	14.9
	Phenol-TCA/Acetone	22433	7879	16.4
	Phenol-MeOH/Chloroform	22437	8985	15.28

## Sheet: List of identifed proteins
Table 2. List of significant modulated proteins isolated from ginseng leaves using four different extraction methods
Ginseng ID	Protein name	[TAIR10]	[Uniprot] ID	[TAIR10] Description	[UniProt] Description	Subcellular localization	TCA/Acetone intensity rep_1	TCA/Acetone intensity rep_2	TCA/Acetone intensity rep_3	TCA/Acetone-MeOH/Chloroform intensity rep_1	TCA/Acetone-MeOH/Chloroform intensity rep_2	TCA/Acetone-MeOH/Chloroform intensity rep_3	Phenol-TCA/Acetone intensity rep_1	Phenol-TCA/Acetone intensity rep_2	Phenol-TCA/Acetone intensity rep_3	Phenol-MeOH/Chloroform intensity rep_1	Phenol-MeOH/Chloroform intensity rep_2	Phenol-MeOH/Chloroform intensity rep_3	Unique peptides	Sequence coverage [%]	Mol. weight [kDa]	Isoelectric point (pI)	Hydrophobicity (GRAVY)	Q-value	Score
Pg_S2618.5	alfin-like 1	AT5G05610.1	Q5XEM9	AT5G05610.1 | Symbols: AL1 | alfin-like 1 | chr5:1677331-1678942 REVERSE LENGTH=241	PHD finger protein ALFIN-LIKE 5 OS=Arabidopsis thaliana GN=AL5 PE=2 SV=1	Extracellular; Cytoplasmic; Nuclear	23.9355	25.5295	25.9782	20.8445	21.3386	21.0793	24.8531	24.7064	24.7721	21.9841	21.0544	21.753	1	7.7	26.688	5.222	-0.677253	0	14.651
Pg_S0008.35	sedoheptulose-bisphosphatase	AT3G55800.1	Q2J1K3	AT3G55800.1 | Symbols: SBPASE | sedoheptulose-bisphosphatase | chr3:20709640-20711421 FORWARD LENGTH=393	Fructose-1,6-bisphosphatase class 1 OS=Rhodopseudomonas palustris (strain HaA2) GN=fbp PE=3 SV=1	Chloroplast;	28.3446	28.1762	28.1612	27.1705	27.7396	27.0979	27.4963	27.5815	27.285	26.641	27.2492	27.2814	1	49.9	42.433	5.477	-0.0707379	0	39.659
Pg_S0015.13	triosephosphate isomerase	AT2G21170.1	P48491	AT2G21170.1 | Symbols: TIM, PDTPI | triosephosphate isomerase | chr2:9071047-9073106 REVERSE LENGTH=315	Triosephosphate isomerase, cytosolic OS=Arabidopsis thaliana GN=CTIMC PE=1 SV=2	Cytoplasmic;	29.3986	29.3474	29.3685	30.749	30.7763	30.8877	30.8979	30.7403	30.8846	30.8353	30.7193	30.6235	4	76	30.359	4.963	-0.069258	0	323.31
Pg_S0015.7	O-acetylserine (thiol) lyase isoform C	AT3G59760.1	Q43317	AT3G59760.1 | Symbols: OASC, ATCS-C | O-acetylserine (thiol) lyase isoform C | chr3:22072119-22075345 REVERSE LENGTH=433	Cysteine synthase OS=Citrullus lanatus PE=1 SV=1	Cytoplasmic; Chloroplast;	26.4972	26.455	26.3177	27.2787	27.3457	27.0686	26.945	26.8176	27.5238	27.5717	27.116	27.2777	2	79	35.538	6.164	-0.0329341	0	82.331
Pg_S0022.1	ethylene-forming enzyme	AT1G05010.1	Q945B5	AT1G05010.1 | Symbols: EFE, ACO4, EAT1 | ethylene-forming enzyme | chr1:1431419-1432695 REVERSE LENGTH=323	2-oxoglutarate-dependent dioxygenase AOP2 OS=Arabidopsis thaliana GN=AOP2 PE=2 SV=1	Cytoplasmic;	25.058	24.8718	24.7376	28.1179	28.1984	27.5313	26.5838	26.886	26.6202	27.7711	27.5553	27.3361	5	34.7	35.151	4.981	-0.300643	0	34.292
Pg_S0022.43	fumarylacetoacetase, putative	AT1G12050.1	Q00770	AT1G12050.1 | Symbols: | fumarylacetoacetase, putative | chr1:4072904-4075856 FORWARD LENGTH=421	Fumarylacetoacetase OS=Emericella nidulans (strain FGSC A4 / ATCC 38163 / CBS 112.46 / NRRL 194 / M139) GN=fahA PE=1 SV=3	Cytoplasmic;	30.019	30.0096	29.821	28.6158	28.6943	28.7005	28.2411	28.5477	28.8156	28.6411	28.6645	28.5963	7	51.9	45.879	5.895	-0.173571	0	77.778
Pg_S1068.4	Thiolase family protein	AT5G47720.2	A8A2L1	AT5G47720.2 | Symbols: | Thiolase family protein | chr5:19331762-19334145 FORWARD LENGTH=415	3-ketoacyl-CoA thiolase OS=Escherichia coli O9:H4 (strain HS) GN=fadI PE=3 SV=1	Chloroplast;	26.4307	26.2367	26.5059	25.6393	25.6259	25.3445	26.0789	26.0122	27.158	25.4937	25.8666	25.162	7	25.5	43.1	7.784	0.136298	0	25.075
Pg_S2867.1	Ribosomal protein S8 family protein	AT5G59850.1	Q11HR6	AT5G59850.1 | Symbols: | Ribosomal protein S8 family protein | chr5:24112499-24113084 REVERSE LENGTH=130	30S ribosomal protein S8 OS=Chelativorans sp. (strain BNC1) GN=rpsH PE=3 SV=1	Cytoplasmic; Mitochondrial;	26.6782	26.5676	26.5952	27.9169	28.0867	27.7367	29.039	28.9277	28.8762	28.471	28.3703	28.4126	6	50.8	14.83	10.175	-0.179231	0	22.008
Pg_S2120.16	Transducin/WD40 repeat-like superfamily protein	AT3G53390.1	Q8BHD1	AT3G53390.1 | Symbols: | Transducin/WD40 repeat-like superfamily protein | chr3:19792781-19796428 FORWARD LENGTH=558	POC1 centriolar protein homolog B OS=Mus musculus GN=Poc1b PE=2 SV=1	Extracellular; Cytoplasmic; Mitochondrial	26.3563	26.5376	26.603	26.5622	26.5626	26.8059	26.5618	26.7085	26.937	26.597	26.7032	26.569	13	58	35.811	6.905	-0.362577	0	33.071
Pg_S3555.1	Alpha-1,4-glucan-protein synthase family protein	AT5G16510.1	Q9LUE6	AT5G16510.1 | Symbols: | Alpha-1,4-glucan-protein synthase family protein | chr5:5393296-5394342 FORWARD LENGTH=348	Probable UDP-arabinopyranose mutase 4 OS=Arabidopsis thaliana GN=RGP4 PE=1 SV=1	Cytoplasmic; Chloroplast;	24.386	24.0214	24.2559	26.3851	26.2844	26.2893	24.7104	24.5728	24.834	26.2233	26.0529	26.2968	6	23.2	38.933	5.117	0.0212034	0	27.107
Pg_S0043.7	Mitochondrial substrate carrier family protein	AT1G72820.1	O18757	AT1G72820.1 | Symbols: | Mitochondrial substrate carrier family protein | chr1:27403457-27404506 FORWARD LENGTH=349	Calcium-binding mitochondrial carrier protein SCaMC-1 OS=Oryctolagus cuniculus GN=SLC25A24 PE=1 SV=1	Mitochondrial; Chloroplast;	26.841	26.907	26.8601	28.7526	28.8704	28.8036	27.6276	27.646	27.5461	27.3063	27.1985	27.0012	1	43.6	30.257	9.223	0.23277	0	116.46
Pg_S0044.5	unknown protein; FUNCTIONS IN: molecular_function unknown; INVOLVED IN: biological_process unknown; LOCATED IN: chloroplast; EXPRESSED IN: 24 plant structures; EXPRESSED DURING: 15 growth stages; CONTAINS InterPro DOMAIN/s: Protein of unknow	unknown	unknown	unknown	unknown	Plasmamembrane; Chloroplast;	27.0868	27.1927	27.4787	27.6274	27.6862	27.5821	27.3147	27.567	27.152	27.71	27.7966	27.5967	5	17	42.446	9.03	-0.0713918	0	59.869
Pg_S0052.31	photosystem II reaction center protein C	ATCG00280.1	Q9L8M2	ATCG00280.1 | Symbols: PSBC | photosystem II reaction center protein C | chrC:33720-35141 FORWARD LENGTH=473	Divinyl chlorophyll a/b light-harvesting protein PcbE OS=Prochlorococcus marinus (strain SARG / CCMP1375 / SS120) GN=pcbE PE=1 SV=1	Plasmamembrane;	25.7486	26.6656	26.102	28.7661	28.6379	28.6623	31.2304	31.214	31.1973	28.4523	28.4665	28.5839	4	20.4	44.051	7.756	0.301746	0	250.79
Pg_S0052.4	Mog1/PsbP/DUF1795-like photosystem II reaction center PsbP family protein	AT1G69680.1	O75002	AT1G69680.1 | Symbols: | Mog1/PsbP/DUF1795-like photosystem II reaction center PsbP family protein | chr1:26205148-26206568 FORWARD LENGTH=202	Nuclear import protein mog1 OS=Schizosaccharomyces pombe (strain 972 / ATCC 24843) GN=mog1 PE=3 SV=1	Chloroplast;	29.8812	30.0394	29.9328	28.9199	28.9545	28.9379	29.6242	29.6396	29.6261	29.5709	29.4222	29.6068	9	40.3	26.281	5.522	-0.384362	0	238.92
Pg_S0056.9	zeta-carotene desaturase	AT3G04870.1	P26294	AT3G04870.1 | Symbols: ZDS, PDE181, SPC1 | zeta-carotene desaturase | chr3:1342842-1346189 FORWARD LENGTH=558	15-cis-phytoene desaturase OS=Synechococcus elongatus (strain PCC 7942) GN=pds PE=1 SV=1	Mitochondrial; Chloroplast;	24.6768	24.4279	24.832	26.1103	26.1837	25.848	27.0386	26.5524	26.5494	25.5699	26.3949	25.5894	10	33.8	53.61	8.114	-0.123333	0	72.284
Pg_S3928.2	eukaryotic elongation factor 5A-1	AT1G13950.1	O50089	AT1G13950.1 | Symbols: EIF-5A, ELF5A-1, ATELF5A-1, EIF5A | eukaryotic elongation factor 5A-1 | chr1:4773631-4774668 FORWARD LENGTH=158	Translation initiation factor 5A OS=Pyrococcus horikoshii (strain ATCC 700860 / DSM 12428 / JCM 9974 / NBRC 100139 / OT-3) GN=eif5a PE=1 SV=1	Cytoplasmic; Nuclear;	27.6697	27.1873	27.3996	27.8829	27.695	28.732	29.243	29.2667	30.0477	27.7714	28.0946	26.5943	5	67.3	17.221	5.394	-0.37673	0	250.97
Pg_S0061.9	alpha/beta-Hydrolases superfamily protein	AT4G16820.1	Q9P979	AT4G16820.1 | Symbols: PLA-I{beta]2 | alpha/beta-Hydrolases superfamily protein | chr4:9467563-9469116 FORWARD LENGTH=517	Feruloyl esterase A OS=Aspergillus awamori GN=faeA PE=1 SV=3	Mitochondrial; Chloroplast;	25.5508	25.3789	25.3209	27.4472	27.455	27.5737	28.1901	28.2567	28.2986	28.7211	28.6113	28.5642	4	15.7	52.173	9.942	-0.416314	0	135.61
Pg_S0068.12	RNA-binding KH domain-containing protein	AT3G04610.1	Q5RB68	AT3G04610.1 | Symbols: FLK | RNA-binding KH domain-containing protein | chr3:1250762-1254272 REVERSE LENGTH=577	Insulin-like growth factor 2 mRNA-binding protein 2 OS=Pongo abelii GN=IGF2BP2 PE=2 SV=1	Nuclear;	24.9098	26.5631	26.5734	23.0858	23.5255	23.7433	25.2257	25.1945	24.8393	24.3485	24.1666	23.9946	8	16.5	72.751	5.134	-0.405588	0	19.371
Pg_S0069.6	proliferating cell nuclear antigen 2	AT2G29570.1	C6A1Y5	AT2G29570.1 | Symbols: PCNA2, ATPCNA2 | proliferating cell nuclear antigen 2 | chr2:12650139-12651598 REVERSE LENGTH=264	DNA polymerase sliding clamp OS=Thermococcus sibiricus (strain MM 739 / DSM 12597) GN=pcn PE=3 SV=1	Nuclear;	24.8998	25.3076	25.1135	26.4477	26.3262	26.5676	28.0803	28.4043	28.4989	25.6883	25.5466	25.5116	3	62.5	29.286	4.462	-0.118182	0	157.4
Pg_S3796.6	Dihydrolipoamide succinyltransferase	AT4G26910.1	Q9CC97	AT4G26910.1 | Symbols: | Dihydrolipoamide succinyltransferase | chr4:13520127-13522889 REVERSE LENGTH=464	Multifunctional 2-oxoglutarate metabolism enzyme OS=Mycobacterium leprae (strain TN) GN=kgd PE=3 SV=2	Mitochondrial; Chloroplast;	29.1358	29.1754	28.9399	28.9303	28.9409	29.0448	27.0765	27.1249	27.1192	28.7591	28.0871	28.4132	5	23.7	51.16	8.522	-0.154757	0	59.649
Pg_S3766.6	Ribosomal protein S3 family protein	AT5G35530.1	Q4A5C7	AT5G35530.1 | Symbols: | Ribosomal protein S3 family protein | chr5:13710355-13712192 REVERSE LENGTH=248	30S ribosomal protein S3 OS=Mycoplasma synoviae (strain 53) GN=rpsC PE=3 SV=1	Cytoplasmic; Mitochondrial;	26.1088	25.9248	26.2782	28.4203	28.1178	28.5316	29.4474	29.3415	29.3322	28.5867	28.5303	28.4149	6	32.9	27.608	9.9	-0.167871	0	147
Pg_S0085.57	NAD(P)-binding Rossmann-fold superfamily protein	AT1G30620.1	Q31FG4	AT1G30620.1 | Symbols: HSR8, MUR4, UXE1 | NAD(P)-binding Rossmann-fold superfamily protein | chr1:10855496-10857970 FORWARD LENGTH=419	ADP-L-glycero-D-manno-heptose-6-epimerase OS=Thiomicrospira crunogena (strain XCL-2) GN=hldD PE=3 SV=1	Plasmamembrane; Chloroplast;	26.2936	26.8102	26.4189	28.5692	28.509	28.3365	27.3267	27.081	26.8186	28.1063	28.6862	27.7581	6	35.8	30.013	6.795	0.150179	0	112.54
Pg_S0085.69	photosystem II subunit Q-2	AT4G05180.1	P12852	AT4G05180.1 | Symbols: PSBQ, PSBQ-2, PSII-Q | photosystem II subunit Q-2 | chr4:2672093-2673170 REVERSE LENGTH=230	Oxygen-evolving enhancer protein 3, chloroplastic OS=Chlamydomonas reinhardtii GN=PSBQ PE=1 SV=1	Mitochondrial; Chloroplast;	28.0419	27.8946	27.8077	25.9928	26.0341	26.3768	25.1002	26.3752	27.5511	32.699	32.6262	32.6331	10	39	24.559	9.479	-0.218615	0	192.23
Pg_S0093.7	glutathione reductase	AT3G54660.1	A2RIB7	AT3G54660.1 | Symbols: GR, EMB2360, ATGR2 | glutathione reductase | chr3:20230356-20233100 REVERSE LENGTH=565	NADH oxidase OS=Lactococcus lactis subsp. cremoris (strain MG1363) GN=noxE PE=1 SV=1	Chloroplast;	29.2938	29.2269	29.3049	29.0342	28.8757	28.9136	28.9527	28.9018	28.9719	28.9737	28.8531	28.9724	10	46.5	60.818	7.83	-0.165187	0	205.64
Pg_S0095.27	Aldolase superfamily protein	AT1G69740.1	Q59295	AT1G69740.1 | Symbols: HEMB1 | Aldolase superfamily protein | chr1:26232197-26234713 FORWARD LENGTH=430	Delta-aminolevulinic acid dehydratase (Fragment) OS=Clostridium josui GN=hemB PE=3 SV=1	Chloroplast;	26.3828	26.6948	26.5095	27.2033	27.2497	27.1374	29.6637	29.6253	29.476	27.1184	27.0644	26.7793	14	50.2	47.233	6.027	-0.206019	0	323.31
Pg_S0096.10	uridylyltransferase-related	AT1G16880.1	P83643	AT1G16880.1 | Symbols: | uridylyltransferase-related | chr1:5773796-5776125 FORWARD LENGTH=290	Unknown protein DS12 from 2D-PAGE of leaf, chloroplastic OS=Oryza sativa subsp. indica GN=OsI_027381 PE=1 SV=2	Mitochondrial; Chloroplast;	29.7374	29.9379	29.8011	29.5915	29.6976	29.7348	28.8673	28.7499	28.7325	30.6383	30.5797	30.6394	11	55.7	31.461	5.064	-0.13391	0	104.56
Pg_S0096.17	TUDOR-SN protein 1	AT5G07350.2	Q9BXT4	AT5G07350.2 | Symbols: Tudor1, AtTudor1, TSN1 | TUDOR-SN protein 1 | chr5:2320021-2324892 REVERSE LENGTH=1007	Tudor domain-containing protein 1 OS=Homo sapiens GN=TDRD1 PE=2 SV=2	Cytoplasmic; Mitochondrial; Chloroplast	29.8732	29.9136	29.8188	28.9148	28.868	28.9924	29.8897	29.9073	29.8511	29.0042	28.8746	28.9047	3	52.4	118.26	8.365	-0.333488	0	323.31
Pg_S0096.2	unknown protein; LOCATED IN: apoplast, chloroplast stroma, chloroplast, chloroplast envelope; EXPRESSED IN: 23 plant structures; EXPRESSED DURING: 14 growth stages; Has 81 Blast hits to 81 proteins in 28 species: Archae - 0; Bacteria - 2; M	unknown	unknown	unknown	unknown	Chloroplast;	28.6325	28.5622	28.7103	28.0338	28.0131	27.9387	28.1854	28.2298	28.0992	27.8134	27.8431	28.1108	5	43.7	33.944	6.109	-0.12926	0	120.49
Pg_S3500.8	N-terminal nucleophile aminohydrolases (Ntn hydrolases) superfamily protein	AT5G08100.1	B4GHE3	AT5G08100.1 | Symbols: | N-terminal nucleophile aminohydrolases (Ntn hydrolases) superfamily protein | chr5:2593242-2594586 REVERSE LENGTH=315	L-asparaginase-like protein GL17509 OS=Drosophila persimilis GN=GL17509 PE=3 SV=1	Extracellular;	27.9835	27.4953	27.5422	28.7325	28.9131	28.7234	28.7306	28.6976	28.4909	28.4473	28.5427	27.9018	8	56.7	27.244	5.49	-0.229555	0	139.57
Pg_S0102.4	Transketolase	AT2G45290.1	A4IQR7	AT2G45290.1 | Symbols: | Transketolase | chr2:18672737-18675589 FORWARD LENGTH=741	1-deoxy-D-xylulose-5-phosphate synthase OS=Geobacillus thermodenitrificans (strain NG80-2) GN=dxs PE=3 SV=1	Chloroplast;	30.5718	30.4158	30.5627	30.4188	30.3795	30.701	30.5549	30.5431	30.5091	30.2518	30.1095	30.0383	10	69	79.508	5.943	-0.184168	0	267.04
Pg_S0102.68	Ribosomal protein S13/S15	AT3G60770.1	P05762	AT3G60770.1 | Symbols: | Ribosomal protein S13/S15 | chr3:22460525-22461656 REVERSE LENGTH=151	30S ribosomal protein S15 OS=Haloarcula marismortui (strain ATCC 43049 / DSM 3752 / JCM 8966 / VKM B-1809) GN=rps15 PE=1 SV=3	Mitochondrial; Nuclear;	26.7191	26.928	27.0077	26.4311	26.6832	26.295	26.6328	26.8306	26.5362	28.3364	28.3781	28.297	6	39.7	17.118	10.743	-0.470199	0	46.339
Pg_S0107.11	Translation elongation factor EF1B, gamma chain	AT1G09640.1	Q9VG96	AT1G09640.1 | Symbols: | Translation elongation factor EF1B, gamma chain | chr1:3120162-3122152 FORWARD LENGTH=414	Glutathione S-transferase D4 OS=Drosophila melanogaster GN=GstD4 PE=1 SV=1	Cytoplasmic;	26.5586	26.6814	26.3282	27.7099	27.7715	27.7125	27.4699	27.2664	27.3407	27.8195	27.6757	27.7331	1	31	48.141	5.545	-0.338298	0	16.54
Pg_S3790.9	Mov34/MPN/PAD-1 family protein	AT1G80210.1	Q7M757	AT1G80210.1 | Symbols: BRCC36A, AtBRCC36A | Mov34/MPN/PAD-1 family protein | chr1:30163357-30165628 REVERSE LENGTH=406	Lys-63-specific deubiquitinase BRCC36-like OS=Mus musculus GN=C6.1al PE=2 SV=1	Cytoplasmic; Nuclear;	25.0578	25.7607	25.4701	27.7995	27.8963	27.7906	27.9094	27.833	27.7517	27.6384	27.5864	27.7057	10	55	34.559	6.245	-0.250809	0	86.499
Pg_S3453.11	RNA-binding (RRM/RBD/RNP motifs) family protein	AT4G14300.1	Q6GLB5	AT4G14300.1 | Symbols: | RNA-binding (RRM/RBD/RNP motifs) family protein | chr4:8231179-8232785 FORWARD LENGTH=411	ELAV-like protein 1 OS=Xenopus tropicalis GN=elavl1 PE=2 SV=1	Extracellular; Nuclear;	26.3809	26.8503	26.5829	25.4372	25.4453	25.257	25.6872	25.6647	25.0529	24.8458	25.2885	24.9282	7	16	44.139	7.352	-0.447631	0	14.705
Pg_S0109.29	chaperonin 20	AT5G20720.1	Q5LAF5	AT5G20720.1 | Symbols: CPN20, CPN10, CHCPN10, ATCPN21, CPN21 | chaperonin 20 | chr5:7015015-7016354 FORWARD LENGTH=253	10 kDa chaperonin OS=Bacteroides fragilis (strain ATCC 25285 / NCTC 9343) GN=groS PE=3 SV=1	Chloroplast;	30.1842	30.1183	30.2214	29.1075	29.2316	29.2471	31.1687	31.0865	31.0507	29.2275	29.3447	29.3698	3	58.8	27.314	8.925	-0.0826923	0	245.91
Pg_S0109.34	anthranilate synthase 2	AT2G29690.1	P32483	AT2G29690.1 | Symbols: ASA2, ATHANSYNAB | anthranilate synthase 2 | chr2:12693899-12696791 FORWARD LENGTH=621	Para-aminobenzoate synthase OS=Streptomyces griseus GN=pab PE=3 SV=1	Mitochondrial; Chloroplast;	26.1449	26.0696	25.9743	27.7345	27.2611	27.2628	26.1112	26.1734	26.2519	27.3281	27.0014	26.9407	11	24.6	65.191	6.945	-0.254811	0	34.331
Pg_S5272.2	ATPase, F0 complex, subunit B/B&apos;, bacterial/chloroplast	unknown	unknown	unknown	unknown	Chloroplast; Nuclear;	26.757	26.8265	26.7535	28.4207	28.4001	28.4192	28.373	28.2101	28.4029	30.2887	30.016	30.1346	6	56.2	19.03	9.229	-0.722222	0	272.11
Pg_S0113.15	lactate/malate dehydrogenase family protein	AT1G53240.1	B3EEE5	AT1G53240.1 | Symbols: mMDH1 | Lactate/malate dehydrogenase family protein | chr1:19854966-19856802 REVERSE LENGTH=341	Malate dehydrogenase OS=Chlorobium limicola (strain DSM 245 / NBRC 103803) GN=mdh PE=3 SV=1	Cytoplasmic; Chloroplast;	27.8795	28.3385	28.2782	28.8693	28.6616	28.9531	29.5514	29.7171	29.1444	28.9373	28.8312	28.7621	6	56.2	47.641	4.87	-0.0931193	0	282.31
Pg_S0121.20	glyoxylate reductase 1	AT3G25530.1	Q94KU2	AT3G25530.1 | Symbols: GHBDH, ATGHBDH, GLYR1, GR1 | glyoxylate reductase 1 | chr3:9271949-9273514 REVERSE LENGTH=289	6-phosphogluconate dehydrogenase, decarboxylating 2, chloroplastic OS=Spinacia oleracea GN=pgdP PE=1 SV=1	Cytoplasmic; Mitochondrial; Chloroplast	26.2526	26.3007	27.6867	28.7771	28.7059	28.6402	28.9547	28.795	28.5969	28.5994	28.6919	28.5275	3	72.6	29.459	6.268	0.0234657	0	190.6
Pg_S3621.4	ethylene-forming enzyme	AT1G05010.1	Q945B5	AT1G05010.1 | Symbols: EFE, ACO4, EAT1 | ethylene-forming enzyme | chr1:1431419-1432695 REVERSE LENGTH=323	2-oxoglutarate-dependent dioxygenase AOP2 OS=Arabidopsis thaliana GN=AOP2 PE=2 SV=1	Cytoplasmic;	24.1071	23.1825	26.2873	27.2417	27.1246	26.8351	28.8974	28.7775	28.6263	27.5009	27.6516	27.4786	9	51.3	35.017	5.012	-0.383117	0	101.86
Pg_S0144.25	fumarase 1	AT2G47510.1	Q72GZ4	AT2G47510.1 | Symbols: FUM1 | fumarase 1 | chr2:19498614-19502020 FORWARD LENGTH=492	Argininosuccinate lyase OS=Thermus thermophilus (strain HB27 / ATCC BAA-163 / DSM 7039) GN=argH PE=3 SV=1	Cytoplasmic; Mitochondrial;	28.2865	28.2569	28.3699	27.2857	26.8866	27.016	27.0252	26.8655	27.0879	26.9067	27.0756	26.7511	1	30.4	53.528	7.62	-0.217039	0	38.885
Pg_S0146.4	hydroxyproline-rich glycoprotein family protein	AT5G16620.1	Q5ZLF0	AT5G16620.1 | Symbols: PDE120, TIC40, ATTIC40 | hydroxyproline-rich glycoprotein family protein | chr5:5450808-5454256 FORWARD LENGTH=447	Hsc70-interacting protein OS=Gallus gallus GN=ST13 PE=2 SV=1	Cytoplasmic; Nuclear;	30.295	30.1288	30.1888	27.2404	27.083	27.0566	27.4956	27.4658	27.3953	28.4865	28.3365	28.577	16	63.2	32.998	4.399	-0.657095	0	66.399
Pg_S0148.7	photosystem II subunit Q-2	AT4G05180.1	P12852	AT4G05180.1 | Symbols: PSBQ, PSBQ-2, PSII-Q | photosystem II subunit Q-2 | chr4:2672093-2673170 REVERSE LENGTH=230	Oxygen-evolving enhancer protein 3, chloroplastic OS=Chlamydomonas reinhardtii GN=PSBQ PE=1 SV=1	Mitochondrial; Chloroplast;	28.0201	27.9395	27.8859	25.7639	25.4569	26.0002	25.9032	26.2924	26.5858	32.2827	32.3406	32.1727	2	38.3	19.476	9.687	-0.327322	0	129.7
Pg_S0159.51	signal recognition particle receptor protein, chloroplast (FTSY)	AT2G45770.2	Q977V2	AT2G45770.2 | Symbols: CPFTSY | signal recognition particle receptor protein, chloroplast (FTSY) | chr2:18851248-18853402 FORWARD LENGTH=373	Signal recognition particle 54 kDa protein OS=Haloferax volcanii (strain ATCC 29605 / DSM 3757 / JCM 8879 / NBRC 14742 / NCIMB 2012 / VKM B-1768 / DS2) GN=srp54 PE=1 SV=1	Cytoplasmic; Chloroplast;	24.6522	25.1337	24.7178	25.3149	25.1281	25.3515	25.7377	25.214	25.3573	25.1507	25.1217	24.6995	6	19.8	44.113	6.074	-0.0603865	0	15.916
Pg_S8321.3	TCP-1/cpn60 chaperonin family protein	AT3G18190.1	Q6NF74	AT3G18190.1 | Symbols: | TCP-1/cpn60 chaperonin family protein | chr3:6232226-6233836 FORWARD LENGTH=536	60 kDa chaperonin 2 OS=Corynebacterium diphtheriae (strain ATCC 700971 / NCTC 13129 / Biotype gravis) GN=groL2 PE=3 SV=1	Cytoplasmic;	25.6471	24.3531	24.3487	28.4012	28.7536	28.6263	27.9974	27.7862	27.8304	29.0157	28.6768	28.8164	16	52.3	60.353	5.633	-0.115288	0	124.11
Pg_S0167.13	Sugar isomerase (SIS) family protein	AT5G42740.1	Q7S986	AT5G42740.1 | Symbols: | Sugar isomerase (SIS) family protein | chr5:17136080-17140622 FORWARD LENGTH=560	Glucose-6-phosphate isomerase OS=Neurospora crassa (strain ATCC 24698 / 74-OR23-1A / CBS 708.71 / DSM 1257 / FGSC 987) GN=pgi-1 PE=3 SV=1	Cytoplasmic;	29.555	29.5887	29.6044	29.8817	29.8807	29.5219	28.7277	28.8033	28.9814	29.7671	29.8301	29.7266	2	31.9	106.13	6.459	-0.0832645	0	152.23
Pg_S4349.1	unknown protein; FUNCTIONS IN: molecular_function unknown; INVOLVED IN: biological_process unknown; LOCATED IN: mitochondrion, chloroplast, plastid, chloroplast envelope; EXPRESSED IN: 24 plant structures; EXPRESSED DURING: 13 growth stages	unknown	unknown	unknown	unknown	Mitochondrial;	26.8993	27.0055	26.8287	27.6072	27.7563	27.7514	26.5524	26.5172	27.6537	27.7712	27.557	27.74	8	42.9	23.453	9.36	-0.33066	0	34.626
Pg_S0170.16	plasma membrane intrinsic protein 1;4	AT4G00430.1	O86231	AT4G00430.1 | Symbols: TMP-C, PIP1;4, PIP1E | plasma membrane intrinsic protein 1;4 | chr4:186143-187531 REVERSE LENGTH=287	Uncharacterized aquaporin-like protein HI_1017 OS=Haemophilus influenzae (strain ATCC 51907 / DSM 11121 / KW20 / Rd) GN=HI_1017 PE=3 SV=1	Plasmamembrane;	25.1911	25.2139	24.9941	26.2965	26.1641	26.3854	28.1761	28.2464	28.4284	25.9904	26.0149	26.0111	4	15.1	61.682	7.211	0.0775439	0	25.123
Pg_S0172.2	2-isopropylmalate synthase 1	AT1G74040.1	B9KB95	AT1G74040.1 | Symbols: IMS1, MAML-3, IPMS2 | 2-isopropylmalate synthase 1 | chr1:27842258-27845566 FORWARD LENGTH=631	2-isopropylmalate synthase OS=Thermotoga neapolitana (strain ATCC 49049 / DSM 4359 / NS-E) GN=leuA PE=3 SV=1	Cytoplasmic;	26.6835	27.0498	26.9413	26.6223	26.3997	26.8346	28.2878	28.0079	28.469	26.6881	26.7749	26.4801	5	52.4	56.551	5.292	-0.0687619	0	117.36
Pg_S0177.7	aspartate aminotransferase 5	AT4G31990.3	P85906	AT4G31990.3 | Symbols: ASP5, AAT3, ATAAT1 | aspartate aminotransferase 5 | chr4:15470876-15473521 REVERSE LENGTH=462	Aspartate aminotransferase 1 (Fragments) OS=Pseudotsuga menziesii PE=1 SV=1	Mitochondrial; Chloroplast;	27.1407	27.0042	27.0109	27.5452	27.6131	27.8683	27.8001	27.8216	27.6022	27.6656	27.6511	27.5813	4	62.7	51.106	6.706	-0.176078	0	31.305
Pg_S0189.7	Mitochondrial import inner membrane translocase subunit Tim17/Tim22/Tim23 family protein	AT5G51150.1	Q9CYV5	AT5G51150.1 | Symbols: | Mitochondrial import inner membrane translocase subunit Tim17/Tim22/Tim23 family protein | chr5:20789034-20791495 FORWARD LENGTH=531	Transmembrane protein 135 OS=Mus musculus GN=Tmem135 PE=2 SV=1	Plasmamembrane; Mitochondrial;	25.0993	25.116	24.9327	29.2636	29.3085	29.3203	28.0687	28.0031	27.7512	25.6375	24.4617	25.5111	2	21	29.482	9.471	0.0318841	0	40.678
Pg_S0192.23	photosystem II stability/assembly factor, chloroplast (HCF136)	AT5G23120.1	Q31CN6	AT5G23120.1 | Symbols: HCF136 | photosystem II stability/assembly factor, chloroplast (HCF136) | chr5:7778154-7780463 FORWARD LENGTH=403	Ycf48-like protein OS=Prochlorococcus marinus (strain MIT 9312) GN=PMT9312_0298 PE=3 SV=1	Chloroplast;	31.6686	31.7711	31.815	30.4684	30.3948	30.4861	30.9273	30.8529	30.8975	30.5478	30.5501	30.5641	4	60.5	45.194	7.134	-0.293462	0	323.31
Pg_S0204.24	cellular apoptosis susceptibility protein, putative / importin-alpha re-exporter, putative	AT2G46520.1	P33307	AT2G46520.1 | Symbols: | cellular apoptosis susceptibility protein, putative / importin-alpha re-exporter, putative | chr2:19096867-19099785 FORWARD LENGTH=972	Importin alpha re-exporter OS=Saccharomyces cerevisiae (strain ATCC 204508 / S288c) GN=CSE1 PE=1 SV=2	Plasmamembrane;	25.8394	26.2256	25.8224	27.5567	27.8367	27.5541	27.2284	26.9918	27.2019	27.9972	27.6968	28.0148	16	23.3	108.94	5.265	-0.022544	0	96.185
Pg_S2543.15	Tetratricopeptide repeat (TPR)-like superfamily protein	AT5G41950.1	-	AT5G41950.1 | Symbols: | Tetratricopeptide repeat (TPR)-like superfamily protein | chr5:16785825-16789360 FORWARD LENGTH=565	-	Nuclear;	27.5842	27.6402	27.4285	25.694	25.6111	25.9523	27.1336	27.2069	27.2575	25.3196	25.1181	25.6025	9	9.2	210.45	6.467	-0.524803	0	72.726
Pg_S0204.45	thylakoid rhodanese-like	AT4G01050.1	Q56XR7	AT4G01050.1 | Symbols: TROL | thylakoid rhodanese-like | chr4:455874-458175 FORWARD LENGTH=466	Rhodanese-like domain-containing protein 4A, chloroplastic OS=Arabidopsis thaliana GN=STR4A PE=2 SV=1	Chloroplast;	27.3842	27.0057	27.2829	30.0501	30.0161	29.913	28.8217	28.7874	28.6166	29.7936	29.7922	29.7701	4	41.8	47.567	4.899	0.0449115	0	104.67
Pg_S0213.13	Subtilase family protein	AT5G67360.1	P40903	AT5G67360.1 | Symbols: ARA12 | Subtilase family protein | chr5:26872192-26874465 REVERSE LENGTH=757	Sexual differentiation process putative subtilase-type proteinase isp6 OS=Schizosaccharomyces pombe (strain 972 / ATCC 24843) GN=isp6 PE=2 SV=1	Extracellular; Plasmamembrane;	29.8607	29.816	29.6746	28.0427	27.8472	28.1099	26.4437	26.58	26.795	28.0648	27.9358	27.8552	9	21.3	84.127	6.115	0.000882724	0	44.223
Pg_S0213.44	alanine aminotransferase 2	AT1G72330.3	Q84WZ8	AT1G72330.3 | Symbols: ALAAT2 | alanine aminotransferase 2 | chr1:27233637-27236571 FORWARD LENGTH=553	60S ribosomal protein L16-like, mitochondrial OS=Arabidopsis thaliana GN=At2g28820 PE=2 SV=2	Cytoplasmic; Chloroplast; Nuclear	29.4896	29.5122	29.4684	28.6353	28.5109	28.764	27.6968	27.654	27.5736	28.5712	28.5717	28.4973	14	33	60.584	5.682	-0.293989	0	124.78
Pg_S0213.45	pectin methylesterase 3	AT3G14310.1	P17407	AT3G14310.1 | Symbols: ATPME3, PME3 | pectin methylesterase 3 | chr3:4772214-4775095 REVERSE LENGTH=592	21 kDa protein OS=Daucus carota PE=2 SV=1	Extracellular; Mitochondrial;	27.7774	27.7008	27.8339	26.7565	26.9152	26.8737	27.7789	27.8932	27.6928	26.8436	26.7482	26.756	8	25.1	60.009	8.891	-0.266545	0	88.977
Pg_S0219.18	30S ribosomal protein, putative	AT5G24490.1	Q5XAQ7	AT5G24490.1 | Symbols: | 30S ribosomal protein, putative | chr5:8365690-8367178 FORWARD LENGTH=308	Ribosome-associated factor Y OS=Streptococcus pyogenes serotype M6 (strain ATCC BAA-946 / MGAS10394) GN=M6_Spy1371 PE=1 SV=1	Chloroplast;	26.0228	26.1996	25.9229	26.1455	26.1002	26.4123	27.2756	26.8297	27.0304	26.1935	26.569	26.6338	8	29.5	35.736	8.92	-0.580878	0	138.28
Pg_S0219.28	D-ribulose-5-phosphate-3-epimerase	AT5G61410.1	P47358	AT5G61410.1 | Symbols: RPE, EMB2728 | D-ribulose-5-phosphate-3-epimerase | chr5:24684085-24685836 REVERSE LENGTH=281	Probable ribulose-phosphate 3-epimerase OS=Mycoplasma genitalium (strain ATCC 33530 / G-37 / NCTC 10195) GN=rpe PE=3 SV=1	Cytoplasmic; Chloroplast;	26.3013	26.6532	26.7303	27.4388	27.7413	27.8823	27.6457	27.4765	27.8061	27.1463	27.2129	27.2408	1	32.4	30.06	7.99	0.195775	0	130.54
Pg_S0397.4	Ribosomal protein S19e family protein	AT5G61170.1	Q8SQS8	AT5G61170.1 | Symbols: | Ribosomal protein S19e family protein | chr5:24611158-24612202 FORWARD LENGTH=143	40S ribosomal protein S19 OS=Encephalitozoon cuniculi (strain GB-M1) GN=RPS19 PE=1 SV=1	Cytoplasmic; Mitochondrial;	27.7123	27.7794	28.1334	27.8915	28.1897	27.8813	28.1158	28.0755	28.1026	28.6336	28.8681	29.1734	1	35	15.975	10.435	-0.497902	0	66.225
Pg_S0223.3	UDP-sugar pyrophosphorylase	AT5G52560.1	Q54YZ0	AT5G52560.1 | Symbols: ATUSP, USP | UDP-sugar pyrophosphorylase | chr5:21331230-21334573 FORWARD LENGTH=614	UTP--glucose-1-phosphate uridylyltransferase 2 OS=Dictyostelium discoideum GN=ugpB PE=2 SV=1	Cytoplasmic;	27.7206	28.0092	27.8579	28.1165	28.1161	28.2879	27.4351	27.2981	27.5556	28.0373	27.9388	27.9558	4	42.3	78	6.4	-0.378766	0	62.207
Pg_S0230.11	-	-	-	-	-	Plasmamembrane;	31.3608	31.2322	31.1979	29.3844	29.5813	29.3485	30.0571	30.1812	30.104	29.1774	29.2226	28.9876	14	42.8	65.181	5.73	-0.0989691	0	323.31
Pg_S0232.15	alanine-2-oxoglutarate aminotransferase 2	AT1G70580.1	P36692	AT1G70580.1 | Symbols: AOAT2, GGT2 | alanine-2-oxoglutarate aminotransferase 2 | chr1:26613222-26615845 FORWARD LENGTH=481	Probable aspartate aminotransferase (Fragment) OS=Streptomyces griseus GN=aspC PE=3 SV=2	Cytoplasmic; Chloroplast;	32.316	32.2333	32.1893	31.6435	31.6848	31.6721	31.4357	31.3244	31.498	31.6168	31.5636	31.6935	1	71.9	53.162	7.208	-0.187318	0	323.31
Pg_S0232.56	light harvesting complex photosystem II	AT3G08940.2	Q03965	AT3G08940.2 | Symbols: LHCB4.2 | light harvesting complex photosystem II | chr3:2717717-2718665 FORWARD LENGTH=287	Chlorophyll a-b binding protein L1818, chloroplastic OS=Chlamydomonas moewusii GN=L1818 PE=2 SV=1	Chloroplast;	32.0249	31.9226	32.0314	33.4298	33.3883	33.5696	33.4499	33.4612	33.5162	33.6776	33.5576	33.4317	2	67.6	30.826	5.518	-0.112324	0	323.31
Pg_S0245.39	FUNCTIONS IN: molecular_function unknown; INVOLVED IN: response to cadmium ion; LOCATED IN: plasma membrane; EXPRESSED IN: 25 plant structures; EXPRESSED DURING: 13 growth stages; CONTAINS InterPro DOMAIN/s: Prefoldin (InterPro:IPR009053); B	unknown	unknown	unknown	unknown	Cytoplasmic; Nuclear;	28.2687	28.4188	28.3934	29.1853	29.2458	29.1275	27.5627	27.9278	28.0137	29.8108	29.7498	29.7842	10	39.8	142.09	4.579	-0.724307	0	210.6
Pg_S0246.19	Sec23/Sec24 protein transport family protein	AT1G05520.1	P38769	AT1G05520.1 | Symbols: | Sec23/Sec24 protein transport family protein | chr1:1631126-1635703 REVERSE LENGTH=783	Uncharacterized protein YHR035W OS=Saccharomyces cerevisiae (strain ATCC 204508 / S288c) GN=YHR035W PE=1 SV=1	Plasmamembrane;	25.2963	25.4521	25.3062	25.0594	24.9001	25.2241	25.0282	25.2814	25.1271	24.9378	24.5606	25.0336	7	15.1	84.666	6.009	-0.0480366	0	24.643
Pg_S0247.51	4-hydroxy-3-methylbut-2-enyl diphosphate synthase	AT5G60600.1	B7VJT8	AT5G60600.1 | Symbols: GCPE, ISPG, CSB3, CLB4, HDS | 4-hydroxy-3-methylbut-2-enyl diphosphate synthase | chr5:24359447-24363274 FORWARD LENGTH=741	4-hydroxy-3-methylbut-2-en-1-yl diphosphate synthase OS=Vibrio splendidus (strain LGP32) GN=ispG PE=3 SV=1	Cytoplasmic;	28.7254	28.7684	28.8534	29.2625	29.2247	29.478	30.5925	30.5834	30.5065	28.9254	29.0097	28.8875	3	61.9	78.043	5.72	-0.22973	0	323.31
Pg_S0252.43	Thioredoxin superfamily protein	AT2G37240.1	Q6PBP3	AT2G37240.1 | Symbols: | Thioredoxin superfamily protein | chr2:15640235-15641720 REVERSE LENGTH=248	Redox-regulatory protein FAM213A OS=Danio rerio GN=fam213a PE=2 SV=2	Mitochondrial; Chloroplast;	29.5936	29.7829	29.6551	29.7964	29.6405	29.7507	29.4659	29.3624	29.3195	30.9387	30.8952	30.8277	7	44.7	23.45	9.92	-0.333953	0	323.31
Pg_S0255.5	acetyl-CoA carboxylase 1	AT1G36160.1	Q00955	AT1G36160.1 | Symbols: ACC1, AT-ACC1, EMB22, GK, PAS3 | acetyl-CoA carboxylase 1 | chr1:13534196-13543773 FORWARD LENGTH=2254	Acetyl-CoA carboxylase OS=Saccharomyces cerevisiae (strain ATCC 204508 / S288c) GN=ACC1 PE=1 SV=2	Cytoplasmic; Nuclear;	25.5034	25.7815	25.3496	24.6708	24.5541	24.8041	24.8552	24.8413	24.3452	24.1984	24.4615	24.4605	2	4.6	252.33	6.1	-0.232346	0	24.846
Pg_S0263.1	purin-rich alpha 1	AT2G32080.1	P42669	AT2G32080.1 | Symbols: PUR ALPHA-1 | purin-rich alpha 1 | chr2:13642716-13644036 REVERSE LENGTH=296	Transcriptional activator protein Pur-alpha OS=Mus musculus GN=Pura PE=1 SV=1	Cytoplasmic; Chloroplast;	26.1158	26.3828	26.3137	25.4675	25.1113	25.3473	25.4406	24.9246	25.3418	25.4272	25.343	25.5741	7	25.1	31.771	5.573	-0.354296	0	16.489
Pg_S0263.12	tubulin alpha-5	AT5G19780.1	Q9ZRB0	AT5G19780.1 | Symbols: TUA5 | tubulin alpha-5 | chr5:6687212-6688926 FORWARD LENGTH=450	Tubulin beta-3 chain OS=Triticum aestivum GN=TUBB3 PE=2 SV=1	Cytoplasmic;	30.2272	29.2914	29.295	29.5335	29.907	29.0788	29.7539	29.7449	29.7309	28.4448	28.1979	28.0546	1	60.6	49.664	4.741	-0.145434	0	173.6
Pg_S6914.7	ARM repeat superfamily protein	AT2G45720.1	Q59MN0	AT2G45720.1 | Symbols: | ARM repeat superfamily protein | chr2:18834468-18836129 FORWARD LENGTH=553	Vacuolar protein 8 OS=Candida albicans (strain SC5314 / ATCC MYA-2876) GN=VAC8 PE=3 SV=3	Plasmamembrane; Cytoplasmic; Golgi	26.5836	26.7004	26.5419	26.5842	26.434	26.3613	27.7618	26.7015	26.9851	26.555	26.6312	26.5027	18	24.2	120.47	4.607	-0.0482094	0	54.565
Pg_S2138.26	P-loop containing nucleoside triphosphate hydrolases superfamily protein	AT1G08410.1	A8GM60	AT1G08410.1 | Symbols: | P-loop containing nucleoside triphosphate hydrolases superfamily protein | chr1:2646307-2649106 FORWARD LENGTH=589	Probable GTP-binding protein EngB OS=Rickettsia akari (strain Hartford) GN=engB PE=3 SV=1	Nuclear;	27.6371	27.5921	27.3979	25.6971	25.4831	25.7964	27.6758	27.7757	27.9827	25.1181	25.2083	25.2579	3	30.2	65.019	7.39	-0.4534	0	66.329
Pg_S0762.64	regulatory particle non-ATPase 13	AT2G26590.1	Q7K2G1	AT2G26590.1 | Symbols: RPN13 | regulatory particle non-ATPase 13 | chr2:11311182-11314717 REVERSE LENGTH=300	Proteasomal ubiquitin receptor ADRM1 homolog OS=Drosophila melanogaster GN=Rpn13 PE=1 SV=1	Cytoplasmic; Nuclear;	26.0823	25.9343	25.7445	25.1581	24.8556	25.3351	25.6867	25.5202	26.0769	24.6764	25.0624	25.2206	6	26.2	35.44	4.084	-0.444688	0	14.278
Pg_S0269.4	Glutathione S-transferase, C-terminal-like;Translation elongation factor EF1B/ribosomal protein S6	unknown	unknown	unknown	unknown	Cytoplasmic; ER;	27.7441	27.851	27.7702	28.3981	28.3923	28.3606	29.8552	29.8329	29.953	28.3855	28.4246	28.5111	2	59.3	24.566	4.325	-0.337168	0	123.43
Pg_S0276.3	plastid movement impaired1	AT1G42550.1	-	AT1G42550.1 | Symbols: PMI1 | plastid movement impaired1 | chr1:15977131-15979734 FORWARD LENGTH=843	-	Nuclear;	25.7187	25.7052	26.0237	25.2113	24.8332	25.0913	25.4923	25.7225	25.3842	25.018	24.9121	24.8817	7	12.6	95.362	5.125	-0.561001	0	35.441
Pg_S2468.28	ATP binding cassette protein 1	AT4G04770.1	P77689	AT4G04770.1 | Symbols: ATABC1, LAF6, ATNAP1, ABC1 | ATP binding cassette protein 1 | chr4:2427998-2429785 REVERSE LENGTH=557	FeS cluster assembly protein SufD OS=Escherichia coli (strain K12) GN=sufD PE=1 SV=1	Nuclear;	26.9356	27.0245	27.062	26.678	27.0624	26.9556	26.5082	26.1247	26.1811	26.9159	27.1637	27.2358	2	21.8	61.741	6.587	-0.471455	0	42.963
Pg_S0280.54	Oxidoreductase, zinc-binding dehydrogenase family protein	AT1G23740.1	B1IZH4	AT1G23740.1 | Symbols: | Oxidoreductase, zinc-binding dehydrogenase family protein | chr1:8398245-8399656 REVERSE LENGTH=386	L-threonine 3-dehydrogenase OS=Escherichia coli (strain ATCC 8739 / DSM 1576 / Crooks) GN=tdh PE=3 SV=1	Cytoplasmic;	25.2349	25.1699	25.1553	27.4644	27.5738	27.2465	26.8174	26.8158	27.0257	26.8606	26.9685	26.8057	4	67.1	32.897	5.672	0.109677	0	74.096
Pg_S0285.13	NADH dehydrogenase subunit 7	ATMG00510.1	A8FNN4	ATMG00510.1 | Symbols: NAD7 | NADH dehydrogenase subunit 7 | chrM:132071-138153 FORWARD LENGTH=394	NADH-quinone oxidoreductase subunit D OS=Campylobacter jejuni subsp. jejuni serotype O:6 (strain 81116 / NCTC 11828) GN=nuoD PE=3 SV=1	Cytoplasmic; Mitochondrial;	25.763	25.8601	25.8015	26.5572	26.6653	26.9344	26.5145	26.3071	26.5317	26.5958	26.6369	26.7294	4	33.1	17.422	6.601	-0.275974	0	37.255
Pg_S0286.5	annexin 2	AT5G65020.1	Q9NFS4	AT5G65020.1 | Symbols: ANNAT2 | annexin 2 | chr5:25973915-25975554 FORWARD LENGTH=317	Annexin E1 OS=Giardia intestinalis GN=ANXE1 PE=1 SV=1	Cytoplasmic; Nuclear;	24.9454	24.896	24.844	27.0587	26.8246	26.555	26.7264	26.5247	26.8086	28.6916	28.5761	28.4837	15	46.9	44.183	5.647	-0.494588	0	76.254
Pg_S0288.27	nucleoporin 155	AT1G14850.1	Q8TB72	AT1G14850.1 | Symbols: NUP155 | nucleoporin 155 | chr1:5116921-5123259 REVERSE LENGTH=1464	Pumilio homolog 2 OS=Homo sapiens GN=PUM2 PE=1 SV=2	Plasmamembrane; Cytoplasmic; Nuclear	26.5235	26.8989	26.3421	24.8243	24.7623	24.8251	25.3687	25.1053	25.5506	24.6268	24.702	24.9904	2	6.1	246.87	5.442	-0.108322	0	25.071
Pg_S0290.5	tocopherol cyclase, chloroplast / vitamin E deficient 1 (VTE1) / sucrose export defective 1 (SXD1)	AT4G32770.1	Q94FY8	AT4G32770.1 | Symbols: VTE1, ATSDX1 | tocopherol cyclase, chloroplast / vitamin E deficient 1 (VTE1) / sucrose export defective 1 (SXD1) | chr4:15804981-15807790 FORWARD LENGTH=488	Probable tocopherol cyclase, chloroplastic OS=Zea mays GN=SDX1 PE=2 SV=1	Cytoplasmic;	30.4358	30.476	30.4297	29.1931	28.5637	28.5603	25.377	25.2453	26.3658	28.659	29.3645	28.8784	18	29.3	73.191	6.494	-0.423101	0	87.161
Pg_S0291.8	serine hydroxymethyltransferase 4	AT4G13930.1	B4TDC8	AT4G13930.1 | Symbols: SHM4 | serine hydroxymethyltransferase 4 | chr4:8048013-8050021 REVERSE LENGTH=471	Serine hydroxymethyltransferase OS=Salmonella heidelberg (strain SL476) GN=glyA PE=3 SV=1	Cytoplasmic; Mitochondrial;	31.4811	31.2429	31.4334	30.7762	30.816	30.9022	31.0714	31.1479	31.1001	30.925	30.6925	30.8473	5	74.3	49.311	7.003	-0.277232	0	323.31
Pg_S1416.42	20S proteasome alpha subunit G1	AT2G27020.1	Q2FQL8	AT2G27020.1 | Symbols: PAG1 | 20S proteasome alpha subunit G1 | chr2:11528515-11530858 REVERSE LENGTH=249	Proteasome subunit beta OS=Methanospirillum hungatei JF-1 (strain ATCC 27890 / DSM 864 / NBRC 100397 / JF-1) GN=psmB PE=3 SV=1	Cytoplasmic;	26.6757	26.9586	26.8346	27.8304	27.9842	27.8974	27.4678	27.3672	27.6726	28.0582	28.071	27.917	2	47.8	27.36	6.097	-0.208434	0	48.396
Pg_S0292.40	HIS triad family protein 3	AT3G56490.1	O84390	AT3G56490.1 | Symbols: HIT3, HINT1 | HIS triad family protein 3 | chr3:20941532-20943129 FORWARD LENGTH=147	Uncharacterized HIT-like protein CT_385 OS=Chlamydia trachomatis (strain D/UW-3/Cx) GN=CT_385 PE=3 SV=1	Cytoplasmic; Chloroplast;	26.1647	26.2598	26.3415	27.0074	26.7764	26.9255	26.8447	26.8535	27.0335	26.5735	26.6146	26.4724	1	31.2	17.05	5.883	-0.167516	0	14.766
Pg_S5071.1	Argonaute family protein	AT2G27040.1	A8BCK6	AT2G27040.1 | Symbols: AGO4, OCP11 | Argonaute family protein | chr2:11536795-11541503 REVERSE LENGTH=924	Protein argonaute OS=Giardia intestinalis (strain ATCC 50803 / WB clone C6) GN=Ago PE=3 SV=1	Nuclear;	28.3026	28.3068	28.4962	26.5629	26.2417	26.8662	27.3634	27.4158	27.8846	26.1271	26.5609	25.0304	14	23.3	102.25	8.553	-0.395405	0	58.633
Pg_S0294.1	beta glucosidase 13	AT5G44640.1	O52629	AT5G44640.1 | Symbols: BGLU13 | beta glucosidase 13 | chr5:18011146-18012669 FORWARD LENGTH=507	Beta-galactosidase OS=Pyrococcus woesei PE=1 SV=1	Cytoplasmic;	32.4304	32.3502	32.538	33.3955	33.3824	33.4353	31.6402	31.6632	31.5629	33.5168	33.4874	33.5169	21	52.8	69.055	5.328	-0.498515	0	323.31
Pg_S0294.9	Protein of unknown function (DUF167)	AT1G49170.1	Q8WUR7	AT1G49170.1 | Symbols: | Protein of unknown function (DUF167) | chr1:18183561-18184434 REVERSE LENGTH=126	UPF0235 protein C15orf40 OS=Homo sapiens GN=C15orf40 PE=1 SV=2	Cytoplasmic; Nuclear;	28.7431	28.8757	28.9502	29.4655	29.4675	29.5432	29.7538	29.7245	29.9617	30.0692	29.9705	29.9873	7	24.9	54.812	5.096	-0.345984	0	172.2
Pg_S0297.27	Pyruvate phosphate dikinase, PEP/pyruvate binding domain	AT1G10760.1	P42850	AT1G10760.1 | Symbols: SEX1, SOP1, SOP, GWD1, GWD | Pyruvate phosphate dikinase, PEP/pyruvate binding domain | chr1:3581210-3590043 REVERSE LENGTH=1399	Phosphoenolpyruvate synthase OS=Pyrococcus furiosus (strain ATCC 43587 / DSM 3638 / JCM 8422 / Vc1) GN=ppsA PE=1 SV=3	Cytoplasmic;	30.9622	30.8167	30.9627	29.4649	29.5962	29.5358	26.7091	26.3509	27.3695	29.5804	29.6324	29.5837	7	37	156.5	5.861	-0.368308	0	215.94
Pg_S4873.1	ADP/ATP carrier 2	AT5G13490.1	Q91XD8	AT5G13490.1 | Symbols: AAC2 | ADP/ATP carrier 2 | chr5:4336034-4337379 FORWARD LENGTH=385	Solute carrier family 25 member 38 OS=Mus musculus GN=Slc25a38 PE=2 SV=1	Mitochondrial; Chloroplast;	28.1309	28.2517	28.2572	31.7915	31.6889	31.85	31.671	31.6074	31.5123	30.747	30.5616	30.6708	3	43.7	42.336	9.658	-0.116195	0	286.57
Pg_S0302.45	thylakoid rhodanese-like	AT4G01050.1	Q56XR7	AT4G01050.1 | Symbols: TROL | thylakoid rhodanese-like | chr4:455874-458175 FORWARD LENGTH=466	Rhodanese-like domain-containing protein 4A, chloroplastic OS=Arabidopsis thaliana GN=STR4A PE=2 SV=1	Chloroplast;	27.0562	27.3479	27.2655	29.3119	29.3083	29.3223	28.1596	27.9593	28.0447	29.4627	29.4892	29.382	5	37.2	46.836	5.083	-0.0489796	0	99.356
Pg_S0304.27	uridine kinase-like 3	AT1G55810.1	Q3JUF6	AT1G55810.1 | Symbols: UKL3 | uridine kinase-like 3 | chr1:20861273-20864003 FORWARD LENGTH=466	Uracil phosphoribosyltransferase OS=Burkholderia pseudomallei (strain 1710b) GN=upp PE=3 SV=1	Cytoplasmic;	29.5687	29.6617	29.6207	30.671	30.6815	30.8041	30.4931	30.6874	30.5922	30.8112	30.4007	30.5436	2	33.7	91.383	6.823	-0.127644	0	323.31
Pg_S0312.8	RING/U-box superfamily protein	AT5G24870.1	Q9M622	AT5G24870.1 | Symbols: | RING/U-box superfamily protein | chr5:8545008-8546923 REVERSE LENGTH=520	Receptor homology region, transmembrane domain- and RING domain-containing protein 1 OS=Arabidopsis thaliana GN=RMR1 PE=2 SV=1	Nuclear;	26.7353	26.4619	26.3457	24.1771	24.4427	24.0661	25.0654	24.9851	25.1864	24.3785	24.2982	24.2577	7	57.9	21.435	4.328	-0.858883	0	47.706
Pg_S0312.9	staurosporin and temperature sensitive 3-like b	AT1G34130.1	P39007	AT1G34130.1 | Symbols: STT3B | staurosporin and temperature sensitive 3-like b | chr1:12430000-12432985 FORWARD LENGTH=735	Dolichyl-diphosphooligosaccharide--protein glycosyltransferase subunit STT3 OS=Saccharomyces cerevisiae (strain ATCC 204508 / S288c) GN=STT3 PE=1 SV=2	Plasmamembrane;	27.7821	28.1155	27.4686	26.5001	26.156	26.3394	26.5899	25.0626	27.0055	25.8019	26.3071	26.2595	3	15.2	67.805	8.769	0.14207	0	46.715
Pg_S0313.13	alpha/beta-Hydrolases superfamily protein	AT4G16820.1	Q9P979	AT4G16820.1 | Symbols: PLA-I{beta]2 | alpha/beta-Hydrolases superfamily protein | chr4:9467563-9469116 FORWARD LENGTH=517	Feruloyl esterase A OS=Aspergillus awamori GN=faeA PE=1 SV=3	Cytoplasmic; ER;	28.2893	27.8949	28.1795	29.2017	29.276	29.4474	27.8039	27.1296	27.5737	29.5274	29.9435	29.7229	7	57.9	18.254	4.942	-0.196951	0	45.872
Pg_S0313.4	ferredoxin/thioredoxin reductase subunit A (variable subunit) 2	AT5G08410.1	P24018	AT5G08410.1 | Symbols: FTRA2 | ferredoxin/thioredoxin reductase subunit A (variable subunit) 2 | chr5:2709974-2710528 REVERSE LENGTH=184	Ferredoxin-thioredoxin reductase, variable chain OS=Synechococcus sp. (strain ATCC 27144 / PCC 6301 / SAUG 1402/1) GN=ftrV PE=1 SV=1	Chloroplast; Nuclear;	27.2204	27.0637	27.4335	25.27	25.3942	25.3172	26.7791	26.7754	26.5573	26.4014	26.4258	26.3615	2	31.5	18.531	7.069	-0.475595	0	6.58
Pg_S0313.6	acetyl-CoA carboxylase carboxyl transferase subunit beta	ATCG00500.1	Q1WUR6	ATCG00500.1 | Symbols: ACCD | acetyl-CoA carboxylase carboxyl transferase subunit beta | chrC:57075-58541 FORWARD LENGTH=488	Acetyl-coenzyme A carboxylase carboxyl transferase subunit beta OS=Lactobacillus salivarius (strain UCC118) GN=accD PE=3 SV=1	Plasmamembrane; Cytoplasmic;	26.9389	27.1849	27.1902	25.3182	25.7206	26.0012	26.5058	26.4679	26.255	25.3556	25.4335	25.2027	7	33.1	27.066	4.741	-0.0216327	0	31.617
Pg_S0318.35	TCP-1/cpn60 chaperonin family protein	AT3G18190.1	Q6NF74	AT3G18190.1 | Symbols: | TCP-1/cpn60 chaperonin family protein | chr3:6232226-6233836 FORWARD LENGTH=536	60 kDa chaperonin 2 OS=Corynebacterium diphtheriae (strain ATCC 700971 / NCTC 13129 / Biotype gravis) GN=groL2 PE=3 SV=1	Cytoplasmic;	25.3422	25.463	25.3325	27.6122	27.4844	27.4087	28.0865	27.8619	27.9681	27.479	27.4993	27.4068	3	44.1	59.06	5.549	-0.195514	0	91.185
Pg_S0318.64	NAD(P)-binding Rossmann-fold superfamily protein	AT1G30620.1	Q31FG4	AT1G30620.1 | Symbols: HSR8, MUR4, UXE1 | NAD(P)-binding Rossmann-fold superfamily protein | chr1:10855496-10857970 FORWARD LENGTH=419	ADP-L-glycero-D-manno-heptose-6-epimerase OS=Thiomicrospira crunogena (strain XCL-2) GN=hldD PE=3 SV=1	Chloroplast;	26.0143	25.8925	25.8526	28.3759	28.3845	28.3813	29.3223	29.4449	29.3579	27.7614	27.9432	28.0385	8	39	34.161	9.67	0.13681	0	100.94
Pg_S2894.3	UDP-Glycosyltransferase superfamily protein	AT4G01070.1	P34317	AT4G01070.1 | Symbols: GT72B1, UGT72B1 | UDP-Glycosyltransferase superfamily protein | chr4:461858-463300 REVERSE LENGTH=480	Putative UDP-glucuronosyltransferase ugt-60 OS=Caenorhabditis elegans GN=ugt-60 PE=3 SV=2	Cytoplasmic; Chloroplast;	26.8933	26.9538	27.1374	26.7965	26.9136	26.6044	25.3518	25.7805	25.379	27.1054	26.8803	27.1846	10	22.5	67.34	6.471	-0.122349	0	23.568
Pg_S0323.5	Eukaryotic aspartyl protease family protein	AT1G25510.1	Q0IU52	AT1G25510.1 | Symbols: | Eukaryotic aspartyl protease family protein | chr1:8959372-8960823 REVERSE LENGTH=483	Aspartic proteinase Asp1 OS=Oryza sativa subsp. japonica GN=ASP1 PE=2 SV=1	Extracellular; Plasmamembrane;	30.4027	30.3575	30.3184	28.1263	28.3537	28.4719	30.9577	31.0757	31.0849	28.543	28.4727	28.5624	3	39.5	47.234	8.951	0.107256	0	188.26
Pg_S3774.2	RAN GTPase 3	AT5G55190.1	Q9CAN3	AT5G55190.1 | Symbols: RAN3, ATRAN3 | RAN GTPase 3 | chr5:22392285-22393957 FORWARD LENGTH=221	Scarecrow-like protein 28 OS=Arabidopsis thaliana GN=SCL28 PE=1 SV=1	Cytoplasmic;	28.5019	28.9599	28.7581	28.3512	28.4559	28.7612	28.2893	28.5768	28.3294	29.2343	29.0712	29.3305	8	32.9	28.626	7.026	-0.317647	0	100.87
Pg_S0326.2	FAD/NAD(P)-binding oxidoreductase	AT1G15140.1	O85675	AT1G15140.1 | Symbols: | FAD/NAD(P)-binding oxidoreductase | chr1:5210403-5212137 REVERSE LENGTH=295	Anthranilate 1,2-dioxygenase electron transfer component OS=Acinetobacter baylyi (strain ATCC 33305 / BD413 / ADP1) GN=antC PE=1 SV=1	Cytoplasmic; Mitochondrial;	29.008	28.9767	29.0968	27.7098	27.6905	27.5035	26.4474	26.3835	26.5672	27.7387	27.7997	27.7266	11	35.2	36.253	8.587	-0.282875	0	45.512
Pg_S0333.6	copper/zinc superoxide dismutase 1	AT1G08830.1	Q6T3B0	AT1G08830.1 | Symbols: CSD1 | copper/zinc superoxide dismutase 1 | chr1:2827700-2829053 FORWARD LENGTH=152	Superoxide dismutase [Cu-Zn] OS=Paecilomyces sinensis GN=SOD1 PE=3 SV=3	Cytoplasmic;	31.3919	29.9445	30.0706	27.1841	26.1516	27.0513	30.2377	30.2143	30.9028	27.7254	27.1813	27.2325	1	50.4	25.044	6.392	-0.1075	0	146.52
Pg_S0350.30	ATPase E1-E2 type family protein / haloacid dehalogenase-like hydrolase family protein	AT3G22910.1	B7M5L3	AT3G22910.1 | Symbols: | ATPase E1-E2 type family protein / haloacid dehalogenase-like hydrolase family protein | chr3:8116335-8119388 REVERSE LENGTH=1017	Potassium-transporting ATPase B chain OS=Escherichia coli O8 (strain IAI1) GN=kdpB PE=3 SV=1	Plasmamembrane;	28.4151	27.9648	27.3698	30.6696	30.4264	30.4395	30.8131	30.825	30.654	32.3763	32.4753	32.6094	1	8	118.81	5.529	-0.105492	0	228.11
Pg_S0354.7	carbamoyl phosphate synthetase A	AT3G27740.1	Q81VE0	AT3G27740.1 | Symbols: CARA | carbamoyl phosphate synthetase A | chr3:10281470-10283792 REVERSE LENGTH=430	GMP synthase [glutamine-hydrolyzing] OS=Bacillus anthracis GN=guaA PE=3 SV=1	Extracellular; Cytoplasmic;	27.1966	27.3181	27.3298	26.398	26.2519	26.3265	26.533	26.6162	26.4621	26.3493	26.0965	26.1474	8	32	47.143	5.859	-0.242923	0	33.806
Pg_S0356.5	RNA-binding (RRM/RBD/RNP motifs) family protein	AT4G14300.1	Q6GLB5	AT4G14300.1 | Symbols: | RNA-binding (RRM/RBD/RNP motifs) family protein | chr4:8231179-8232785 FORWARD LENGTH=411	ELAV-like protein 1 OS=Xenopus tropicalis GN=elavl1 PE=2 SV=1	Nuclear;	29.0661	29.2278	29.3141	27.4996	27.3433	27.4392	28.5346	28.6668	28.6351	26.9808	27.0199	26.9778	6	25.2	53.306	4.957	-0.83313	0	59.502
Pg_S0358.35	WUS-interacting protein 2	AT3G15880.2	Q84JM4	AT3G15880.2 | Symbols: WSIP2, TPR4 | WUS-interacting protein 2 | chr3:5364454-5371869 REVERSE LENGTH=1137	Topless-related protein 3 OS=Arabidopsis thaliana GN=TPR3 PE=1 SV=1	Plasmamembrane; Nuclear;	26.8671	26.8586	26.6481	25.3383	25.4496	25.4522	25.5862	25.5455	25.6897	24.8362	24.8253	25.3121	4	11.2	127.04	6.574	-0.314609	0	25.169
Pg_S0363.19	serine transhydroxymethyltransferase 1	AT4G37930.1	A7FFW1	AT4G37930.1 | Symbols: SHM1, STM, SHMT1 | serine transhydroxymethyltransferase 1 | chr4:17831891-17834742 REVERSE LENGTH=517	Serine hydroxymethyltransferase OS=Yersinia pseudotuberculosis serotype O:1b (strain IP 31758) GN=glyA PE=3 SV=1	Cytoplasmic; Mitochondrial;	30.766	31.0195	30.8695	32.8047	32.5966	32.6998	32.0922	32.113	32.0515	32.6301	32.6704	32.6543	1	66.3	57.337	8.461	-0.236346	0	323.31
Pg_S0363.20	Zincin-like metalloproteases family protein	AT5G10540.1	A6ZZI7	AT5G10540.1 | Symbols: | Zincin-like metalloproteases family protein | chr5:3328119-3332462 FORWARD LENGTH=701	Mitochondrial intermediate peptidase OS=Saccharomyces cerevisiae (strain YJM789) GN=OCT1 PE=3 SV=1	Cytoplasmic;	25.8617	26.1494	26.7138	27.8607	28.0165	27.7367	29.5452	28.8485	29.0976	27.9487	27.8652	27.7104	16	57.2	78.793	5.129	-0.338054	0	100.36
Pg_S0568.3	RNAse l inhibitor protein 2	AT4G19210.1	Q8X6U5	AT4G19210.1 | Symbols: ATRLI2, RLI2 | RNAse l inhibitor protein 2 | chr4:10501906-10504776 FORWARD LENGTH=605	sn-glycerol-3-phosphate import ATP-binding protein UgpC OS=Escherichia coli O157:H7 GN=ugpC PE=3 SV=2	Cytoplasmic; Nuclear;	26.2011	25.3838	25.5659	26.7598	26.0678	26.3421	26.4528	26.4241	26.7774	26.4694	26.3027	26.0549	9	26.8	68.226	7.413	-0.200661	0	68.313
Pg_S0366.11	aldehyde dehydrogenase 11A3	AT2G24270.4	B0RNV0	AT2G24270.4 | Symbols: ALDH11A3 | aldehyde dehydrogenase 11A3 | chr2:10327109-10329601 REVERSE LENGTH=503	NAD/NADP-dependent betaine aldehyde dehydrogenase OS=Xanthomonas campestris pv. campestris (strain B100) GN=betB PE=3 SV=1	Cytoplasmic;	31.6325	31.5606	31.6853	31.7378	31.6309	31.8409	30.5911	30.6294	30.447	31.5401	31.1483	31.3259	2	66.1	53.249	7.483	0.0237903	0	323.31
Pg_S0368.6	translation initiation factor 3B1	AT5G27640.2	P12806	AT5G27640.2 | Symbols: TIF3B1, EIF3B, ATEIF3B-1, EIF3B-1, ATTIF3B1 | translation initiation factor 3B1 | chr5:9781207-9784759 REVERSE LENGTH=738	Eukaryotic translation initiation factor 3 subunit B (Fragment) OS=Pichia angusta GN=TIF32 PE=3 SV=1	Cytoplasmic;	26.4564	26.2893	26.5368	25.9374	26.1904	26.073	27.7236	27.6695	27.6781	25.9691	26.2065	26.0195	14	26.1	82.755	4.959	-0.563194	0	37.807
Pg_S0374.12	acetyl Co-enzyme a carboxylase biotin carboxylase subunit	AT5G35360.3	B2A170	AT5G35360.3 | Symbols: CAC2 | acetyl Co-enzyme a carboxylase biotin carboxylase subunit | chr5:13584300-13588163 FORWARD LENGTH=555	Carbamoyl-phosphate synthase large chain OS=Natranaerobius thermophilus (strain ATCC BAA-1301 / DSM 18059 / JW/NM-WN-LF) GN=carB PE=3 SV=1	Mitochondrial; Chloroplast;	28.4588	28.6439	28.6452	29.7317	29.8238	29.9784	30.1034	30.1755	30.1235	29.8906	29.9351	29.9328	1	46.6	69.911	7.883	-0.0992101	0	207.41
Pg_S0374.5	glyceraldehyde 3-phosphate dehydrogenase A subunit	AT3G26650.1	Q5PJI5	AT3G26650.1 | Symbols: GAPA, GAPA-1 | glyceraldehyde 3-phosphate dehydrogenase A subunit | chr3:9795226-9796848 FORWARD LENGTH=396	D-erythrose-4-phosphate dehydrogenase OS=Salmonella paratyphi A (strain ATCC 9150 / SARB42) GN=epd PE=3 SV=1	Chloroplast;	35.366	34.9301	35.1795	33.3959	33.4979	33.8042	33.0181	33.01	33.1193	33.0304	33.0302	33.1081	5	65.9	42.453	7.39	0.018797	0	323.31
Pg_S0388.2	PDI-like 1-1	AT1G21750.1	Q9DGI3	AT1G21750.1 | Symbols: ATPDIL1-1, ATPDI5, PDI5, PDIL1-1 | PDI-like 1-1 | chr1:7645767-7648514 FORWARD LENGTH=501	Thioredoxin OS=Ictalurus punctatus GN=txn PE=3 SV=1	ER;	33.4777	33.5793	33.4824	31.1443	31.3377	31.335	31.7701	31.772	31.7645	31.3698	31.3167	31.3861	3	59.4	55.749	4.681	-0.195618	0	323.31
Pg_S0398.4	D-aminoacid aminotransferase-like PLP-dependent enzymes superfamily protein	AT5G27410.1	Q8W0Z7	AT5G27410.1 | Symbols: | D-aminoacid aminotransferase-like PLP-dependent enzymes superfamily protein | chr5:9678821-9682468 FORWARD LENGTH=559	Branched-chain-amino-acid aminotransferase-like protein 1 OS=Arabidopsis thaliana GN=At3g05190 PE=2 SV=1	Cytoplasmic; Chloroplast;	26.7036	26.2471	26.9122	28.269	28.5104	28.295	26.9143	27.2563	27.2927	28.2367	28.0893	28.0467	17	45	58.818	6.291	-0.279885	0	88.561
Pg_S0399.31	CLP protease R subunit 4	AT4G17040.1	Q7UK66	AT4G17040.1 | Symbols: CLPR4 | CLP protease R subunit 4 | chr4:9586740-9589297 REVERSE LENGTH=305	ATP-dependent Clp protease proteolytic subunit 2 OS=Rhodopirellula baltica (strain SH1) GN=clpP2 PE=3 SV=1	Plasmamembrane; Cytoplasmic; Chloroplast	25.2682	25.7967	25.5006	27.0273	27.0017	27.1279	25.7604	25.9179	25.9341	28.1844	28.0329	28.112	7	41.9	26.579	5.204	-0.135169	0	44.374
Pg_S1255.26	CONTAINS InterPro DOMAIN/s: Endoribonuclease XendoU (InterPro:IPR018998); Has 943 Blast hits to 770 proteins in 162 species: Archae - 0; Bacteria - 61; Metazoa - 472; Fungi - 40; Plants - 78; Viruses - 35; Other Eukaryotes - 257 (source: NCB	unknown	unknown	unknown	unknown	Cytoplasmic; Nuclear;	26.396	26.4577	26.5003	24.7978	25.0388	25.169	25.6931	25.3606	25.9548	25.0929	25.2563	25.3171	5	18.5	49.07	5.007	-0.913615	0	18.773
Pg_S0401.3	T-complex protein 1 alpha subunit	AT3G20050.1	Q9L7P5	AT3G20050.1 | Symbols: ATTCP-1, TCP-1 | T-complex protein 1 alpha subunit | chr3:6998544-7002266 REVERSE LENGTH=545	60 kDa chaperonin 1 OS=Vibrio parahaemolyticus serotype O3:K6 (strain RIMD 2210633) GN=groL1 PE=3 SV=2	Cytoplasmic;	26.8975	26.4553	25.8811	26.5236	26.5337	26.525	27.5297	27.4701	27.5609	26.7955	26.7773	25.9185	6	37.1	58.858	5.889	-0.0213235	0	96.599
Pg_S0402.13	TCP-1/cpn60 chaperonin family protein	AT3G18190.1	Q6NF74	AT3G18190.1 | Symbols: | TCP-1/cpn60 chaperonin family protein | chr3:6232226-6233836 FORWARD LENGTH=536	60 kDa chaperonin 2 OS=Corynebacterium diphtheriae (strain ATCC 700971 / NCTC 13129 / Biotype gravis) GN=groL2 PE=3 SV=1	Plasmamembrane; Chloroplast;	28.5243	28.8118	29.0473	28.1685	28.5832	27.9628	29.0441	29.1532	29.2924	27.4313	27.5572	27.8114	3	35.7	116.27	6.742	-0.131947	0	290.7
Pg_S0402.8	cold-regulated 47	unknown	unknown	unknown	unknown	Cytoplasmic; Nuclear;	27.2185	27.162	27.1069	26.5711	26.3853	26.2149	28.7331	28.6924	28.9877	26.1798	26.3633	26.0251	5	48.9	24.851	4.888	-1.30448	0	281.5
Pg_S0403.10	pleiotropic drug resistance 12	AT1G15520.1	P08183	AT1G15520.1 | Symbols: PDR12, ATPDR12, ABCG40, ATABCG40 | pleiotropic drug resistance 12 | chr1:5331993-5338175 REVERSE LENGTH=1423	Multidrug resistance protein 1 OS=Homo sapiens GN=ABCB1 PE=1 SV=3	Plasmamembrane;	29.435	29.5914	29.7545	29.6985	29.6483	29.6055	29.432	29.2907	29.1932	29.6566	29.5919	29.5694	5	21.6	184.71	6.244	-0.00829268	0	226.21
Pg_S0403.51	translocon at the outer envelope membrane of chloroplasts 159	AT4G02510.1	O23680	AT4G02510.1 | Symbols: TOC159, TOC86, PPI2, TOC160, ATTOC159 | translocon at the outer envelope membrane of chloroplasts 159 | chr4:1104766-1109360 FORWARD LENGTH=1503	Translocase of chloroplast 33, chloroplastic OS=Arabidopsis thaliana GN=TOC33 PE=1 SV=1	Cytoplasmic; Chloroplast; Nuclear	28.0088	27.6115	27.7841	26.6564	26.619	26.1063	27.7408	28.0967	27.6387	26.3464	25.4103	25.9302	1	21.5	156.2	4.277	-0.458751	0	111.39
Pg_S0403.56	HSP20-like chaperones superfamily protein	AT5G02480.1	-	AT5G02480.1 | Symbols: | HSP20-like chaperones superfamily protein | chr5:548152-549678 FORWARD LENGTH=508	-	Cytoplasmic; Nuclear;	26.937	27.2103	27.1143	24.9938	24.9022	24.4987	26.3167	26.8385	27.2294	24.1904	24.9011	24.9743	2	32.7	26.756	4.361	-0.481673	0	24.602
Pg_S0403.64	beta glucosidase 11	AT1G02850.4	Q3E8E5	AT1G02850.4 | Symbols: BGLU11 | beta glucosidase 11 | chr1:630569-633085 FORWARD LENGTH=521	Putative myrosinase 3 OS=Arabidopsis thaliana GN=TGG3 PE=5 SV=1	Plasmamembrane; Vacuole;	29.0959	28.1774	29.006	27.4915	26.7554	27.0457	25.7218	26.4761	26.4406	25.9173	26.2147	25.6849	4	12	58.957	5.623	-0.276938	0	30.51
Pg_S0408.13	GTP binding Elongation factor Tu family protein	AT5G60390.1	A1UBL1	AT5G60390.1 | Symbols: | GTP binding Elongation factor Tu family protein | chr5:24289226-24290675 FORWARD LENGTH=449	Elongation factor Tu OS=Mycobacterium sp. (strain KMS) GN=tuf PE=3 SV=1	Cytoplasmic;	33.1504	33.2403	33.185	32.9946	33.2477	32.9433	32.8475	32.7963	33.0049	33.1007	33.0515	33.2189	2	52.1	49.383	9.112	-0.3	0	323.31
Pg_S3468.1	RAB GTPase homolog 1C	AT4G17530.1	Q9VP48	AT4G17530.1 | Symbols: RAB1C, ATRAB1C, ATRABD2C | RAB GTPase homolog 1C | chr4:9773721-9775424 REVERSE LENGTH=202	Ras-related protein Rab-26 OS=Drosophila melanogaster GN=Rab26 PE=2 SV=2	Unknown	25.6759	26.2979	25.682	27.8163	27.7444	27.7567	27.8362	27.9031	27.9578	27.0993	26.7414	27.311	2	47.8	22.579	5.081	-0.292118	0	28.25
Pg_S0426.15	Cysteine proteinases superfamily protein	AT1G02305.1	P05993	AT1G02305.1 | Symbols: | Cysteine proteinases superfamily protein | chr1:455816-457974 FORWARD LENGTH=362	Cysteine proteinase (Fragment) OS=Carica papaya PE=2 SV=1	Extracellular; Lysosomal;	27.7436	27.4113	27.7131	26.1359	25.9612	26.0473	26.5199	26.6596	26.6759	26.0667	25.8836	25.937	6	31.3	39.528	5.717	-0.247486	0	74.667
Pg_S0426.34	GDP-D-mannose 3&apos;,5&apos;-epimerase	unknown	unknown	unknown	unknown	Cytoplasmic;	28.1197	28.255	28.1226	28.7613	28.9347	29.06	29.9502	30.0264	29.8158	28.8626	29.03	28.8769	1	64.6	42.509	6.052	-0.452394	0	141.18
Pg_S4658.11	RNA-binding (RRM/RBD/RNP motifs) family protein	AT4G14300.1	Q6GLB5	AT4G14300.1 | Symbols: | RNA-binding (RRM/RBD/RNP motifs) family protein | chr4:8231179-8232785 FORWARD LENGTH=411	ELAV-like protein 1 OS=Xenopus tropicalis GN=elavl1 PE=2 SV=1	Chloroplast;	27.8829	28.2399	27.9503	26.8348	27.019	27.1496	30.645	30.5507	30.5756	26.4893	26.3738	26.8307	6	45.8	29.35	4.693	-0.436742	0	323.31
Pg_S0428.4	FAD-binding Berberine family protein	AT4G20840.1	P93762	AT4G20840.1 | Symbols: | FAD-binding Berberine family protein | chr4:11157916-11159535 FORWARD LENGTH=539	Hexose oxidase OS=Chondrus crispus GN=HOX PE=1 SV=2	Plasmamembrane; Chloroplast;	30.2119	29.6894	29.7648	27.898	27.9002	27.7834	26.9394	27.1115	27.0613	28.1289	27.8561	28.057	6	36.2	67.055	5.835	-0.1125	0	103.95
Pg_S0428.46	ATPase, AAA-type, CDC48 protein	AT5G03340.1	P46466	AT5G03340.1 | Symbols: | ATPase, AAA-type, CDC48 protein | chr5:810091-813133 REVERSE LENGTH=810	26S protease regulatory subunit 4 homolog OS=Oryza sativa subsp. japonica GN=TBP2 PE=2 SV=2	Cytoplasmic;	30.9985	30.7811	30.9513	30.3542	30.3081	30.3401	30.2005	30.2515	30.2782	30.2709	30.2587	30.2795	6	60.2	89.461	4.957	-0.382754	0	323.31
Pg_S0429.2	photosystem II reaction center protein D	ATCG00270.1	Q0G9Y2	ATCG00270.1 | Symbols: PSBD | photosystem II reaction center protein D | chrC:32711-33772 FORWARD LENGTH=353	Photosystem Q(B) protein OS=Daucus carota GN=psbA PE=3 SV=1	Plasmamembrane;	30.5234	30.3414	30.3453	33.1952	33.5643	33.8698	33.591	33.5316	33.8094	33.1566	33.3435	33.325	8	55.8	17.135	4.524	0.152597	0	323.31
Pg_S0429.9	non-ATPase subunit 9	AT1G29150.1	Q8W207	AT1G29150.1 | Symbols: ATS9, RPN6 | non-ATPase subunit 9 | chr1:10181240-10182499 FORWARD LENGTH=419	COP9 signalosome complex subunit 2 OS=Arabidopsis thaliana GN=CSN2 PE=1 SV=1	Cytoplasmic;	24.2257	25.0407	25.028	28.1559	27.604	27.2991	26.9905	27.0407	27.2512	28.2581	27.9172	28.6094	1	50.1	47.248	5.86	-0.0839243	0	64.931
Pg_S2296.5	rotamase cyclophilin 2	AT3G56070.1	P23285	AT3G56070.1 | Symbols: ROC2 | rotamase cyclophilin 2 | chr3:20806987-20807517 REVERSE LENGTH=176	Peptidyl-prolyl cis-trans isomerase B OS=Saccharomyces cerevisiae (strain ATCC 204508 / S288c) GN=CPR2 PE=1 SV=1	Cytoplasmic;	26.4271	27.2788	26.7001	25.7858	26.0428	25.799	27.8154	27.7498	27.9847	25.4677	25.6835	25.8791	5	33.3	18.693	7.455	-0.248851	0	32.34
Pg_S0638.1	calmodulin 7	AT3G43810.1	O64943	AT3G43810.1 | Symbols: CAM7 | calmodulin 7 | chr3:15664619-15666355 REVERSE LENGTH=149	Polcalcin Jun o 2 OS=Juniperus oxycedrus PE=1 SV=2	Cytoplasmic; Nuclear;	26.1853	26.3351	26.3154	26.0922	26.008	26.1237	25.4965	25.4785	25.9076	29.2796	29.3368	29	6	65.8	16.848	3.943	-0.619463	0	86.571
Pg_S0431.50	Co-chaperone GrpE family protein	AT5G17710.2	P0CW10	AT5G17710.2 | Symbols: EMB1241 | Co-chaperone GrpE family protein | chr5:5839560-5841639 REVERSE LENGTH=326	Protein GrpE OS=Methanosarcina mazei GN=grpE PE=2 SV=1	Cytoplasmic; Chloroplast; Nuclear	28.6882	28.5579	28.6176	27.4129	27.7531	27.6615	28.5144	28.5293	28.4198	27.8851	28.022	27.786	2	26.3	37.712	4.469	-0.550585	0	150.67
Pg_S0431.62	polyribonucleotide nucleotidyltransferase, putative	AT3G03710.1	B1ZS98	AT3G03710.1 | Symbols: RIF10, PNP | polyribonucleotide nucleotidyltransferase, putative | chr3:919542-924906 FORWARD LENGTH=922	Polyribonucleotide nucleotidyltransferase OS=Opitutus terrae (strain DSM 11246 / PB90-1) GN=pnp PE=3 SV=1	Mitochondrial; Chloroplast; Nuclear	28.2738	28.3998	27.9454	26.3849	26.5749	26.7157	26.4544	26.854	26.9091	26.3068	26.6078	26.4731	2	19	103.65	6.839	-0.306653	0	68.345
Pg_S0439.40	voltage dependent anion channel 1	AT3G01280.1	P07144	AT3G01280.1 | Symbols: VDAC1, ATVDAC1 | voltage dependent anion channel 1 | chr3:85754-87612 FORWARD LENGTH=276	Mitochondrial outer membrane protein porin OS=Neurospora crassa (strain ATCC 24698 / 74-OR23-1A / CBS 708.71 / DSM 1257 / FGSC 987) GN=B7H23.070 PE=2 SV=1	Mitochondrial;	27.2816	27.1388	27.2314	26.9763	27.1652	27.1732	27.4159	27.4894	27.5348	26.8723	26.8364	26.9461	1	26.8	29.625	8.677	-0.224275	0	20.726
Pg_S0439.48	ATPase, V0/A0 complex, subunit C/D	AT3G28715.1	Q9VCQ3	AT3G28715.1 | Symbols: | ATPase, V0/A0 complex, subunit C/D | chr3:10778025-10780350 FORWARD LENGTH=351	Probable V-type proton ATPase subunit d 2 OS=Drosophila melanogaster GN=VhaAC39-2 PE=2 SV=1	Cytoplasmic; Nuclear;	25.4671	25.7623	25.5199	26.7827	26.7035	26.8772	26.0942	26.2396	26.1218	27.1079	26.7572	26.9622	2	39.9	40.607	4.695	-0.146439	0	40.759
Pg_S3338.6	ADP-glucose pyrophosphorylase family protein	AT1G74910.1	Q9Y725	AT1G74910.1 | Symbols: | ADP-glucose pyrophosphorylase family protein | chr1:28135770-28138456 REVERSE LENGTH=415	Mannose-1-phosphate guanyltransferase 1 OS=Candida glabrata (strain ATCC 2001 / CBS 138 / JCM 3761 / NBRC 0622 / NRRL Y-65) GN=MPG1 PE=1 SV=1	Plasmamembrane;	25.6273	25.6507	25.5337	26.4923	26.3111	26.4119	26.6181	26.6161	26.367	26.4668	26.525	26.3621	10	30.1	46.075	6.03	0.0327711	0	34.812
Pg_S4067.1	diacylglycerol kinase 5	AT2G20900.1	Q64398	AT2G20900.1 | Symbols: DGK5, ATDGK5 | diacylglycerol kinase 5 | chr2:8989412-8992798 REVERSE LENGTH=509	Diacylglycerol kinase eta OS=Mesocricetus auratus GN=DGKH PE=2 SV=1	Cytoplasmic; Nuclear;	26.2141	26.8768	26.932	25.7532	25.9181	25.7532	26.0941	25.6064	25.911	25.855	25.639	25.313	8	23.7	53.927	6.136	-0.353814	0	21.031
Pg_S3713.16	RAB GTPase homolog G3F	AT3G18820.1	Q9JKM7	AT3G18820.1 | Symbols: ATRABG3F, ATRAB7B, RAB71, RABG3F, RAB7B | RAB GTPase homolog G3F | chr3:6484266-6486005 FORWARD LENGTH=206	Ras-related protein Rab-37 OS=Mus musculus GN=Rab37 PE=1 SV=2	Cytoplasmic; Chloroplast;	26.8998	27.01	27.1187	27.9911	28.0615	27.9193	27.3904	27.362	27.3704	28.1033	28.0002	27.7549	1	60.2	23.054	4.881	-0.385922	0	78.152
Pg_S0447.20	NmrA-like negative transcriptional regulator family protein	AT4G39230.1	O65679	AT4G39230.1 | Symbols: | NmrA-like negative transcriptional regulator family protein | chr4:18266024-18267604 REVERSE LENGTH=308	Probable pinoresinol-lariciresinol reductase 3 OS=Arabidopsis thaliana GN=PLR3 PE=3 SV=2	Cytoplasmic;	27.3184	27.4747	27.411	28.5532	28.412	28.5385	27.9041	27.8093	27.5911	27.5615	27.8634	28.3583	5	47.7	64.619	6.265	-0.0657046	0	30.492
Pg_S3713.26	cold, circadian rhythm, and RNA binding 1	unknown	unknown	unknown	unknown	Nuclear;	28.238	28.3785	28.172	25.7098	25.5772	25.8639	28.5683	28.7613	28.5451	26.598	26.389	26.2903	3	37.5	14.655	5.046	-0.806944	0	47.035
Pg_S0455.8	NAD(P)-binding Rossmann-fold superfamily protein	AT1G30620.1	Q31FG4	AT1G30620.1 | Symbols: HSR8, MUR4, UXE1 | NAD(P)-binding Rossmann-fold superfamily protein | chr1:10855496-10857970 FORWARD LENGTH=419	ADP-L-glycero-D-manno-heptose-6-epimerase OS=Thiomicrospira crunogena (strain XCL-2) GN=hldD PE=3 SV=1	Mitochondrial;	25.9164	26.4571	26.707	28.3729	28.5085	28.162	27.8752	28.0667	28.1821	27.9072	27.607	27.7062	9	49.4	33.993	8.471	-0.0761146	0	85.641
Pg_S0953.13	Glucose-1-phosphate adenylyltransferase family protein	AT4G39210.1	B5EUW3	AT4G39210.1 | Symbols: APL3 | Glucose-1-phosphate adenylyltransferase family protein | chr4:18260332-18263181 FORWARD LENGTH=521	Glucose-1-phosphate adenylyltransferase OS=Vibrio fischeri (strain MJ11) GN=glgC PE=3 SV=1	Cytoplasmic; Chloroplast;	26.0046	25.4691	25.726	25.7703	25.8104	26.2027	26.345	26.5225	26.3811	25.7541	25.711	25.6841	9	33.2	39.711	6.475	0.100277	0	26.309
Pg_S0457.1	Sec14p-like phosphatidylinositol transfer family protein	AT1G72160.1	Q8NHP6	AT1G72160.1 | Symbols: | Sec14p-like phosphatidylinositol transfer family protein | chr1:27153823-27155609 REVERSE LENGTH=490	Motile sperm domain-containing protein 2 OS=Homo sapiens GN=MOSPD2 PE=1 SV=1	Cytoplasmic; Nuclear;	26.2093	26.2009	26.4532	26.1226	26.1498	26.4557	27.5494	26.4896	26.5546	26.5436	26.5815	26.6041	5	29	52.919	5.169	-0.503463	0	37.453
Pg_S0458.3	Phosphoglucomutase/phosphomannomutase family protein	AT1G70730.3	P18159	AT1G70730.3 | Symbols: PGM2 | Phosphoglucomutase/phosphomannomutase family protein | chr1:26669020-26673166 REVERSE LENGTH=662	Phosphoglucomutase OS=Bacillus subtilis (strain 168) GN=pgcA PE=1 SV=3	Mitochondrial; Chloroplast;	31.3039	31.4298	31.2924	30.5571	30.5375	30.5151	30.4029	30.5052	30.3214	30.5802	30.4616	30.6724	8	47.9	84.533	6.444	-0.190722	0	323.31
Pg_S0471.3	Rieske (2Fe-2S) domain-containing protein	AT1G71500.1	-	AT1G71500.1 | Symbols: | Rieske (2Fe-2S) domain-containing protein | chr1:26936084-26937331 FORWARD LENGTH=287	-	Plasmamembrane; Chloroplast;	27.1576	27.2576	27.167	27.6635	27.7557	27.85	27.0824	27.2002	27.3488	27.8252	27.7022	27.7533	3	50.5	9.819	3.941	0.378495	0	37.427
Pg_S0475.11	Coatomer, beta subunit	AT4G31480.1	Q9U4N3	AT4G31480.1 | Symbols: | Coatomer, beta subunit | chr4:15264145-15267384 FORWARD LENGTH=948	Coatomer subunit beta OS=Toxoplasma gondii PE=2 SV=2	Golgi;	27.8489	27.2	27.3745	27.7423	27.6861	27.6536	27.9268	27.8598	27.7142	27.5953	27.544	27.5135	6	33.5	105.88	5.446	0.00864979	0	129.75
Pg_S0476.10	Dehydrin family protein	AT1G76180.1	Q9XJ56	AT1G76180.1 | Symbols: ERD14 | Dehydrin family protein | chr1:28587013-28587657 REVERSE LENGTH=185	Phosphoprotein ECPP44 OS=Daucus carota GN=ECPP44 PE=1 SV=1	Nuclear;	29.0838	28.9175	29.0562	27.8131	27.9477	27.9446	29.7798	29.7509	29.7899	27.81	27.8439	27.8602	8	47.7	24.507	4.776	-1.33486	0	181.67
Pg_S0476.47	glyceraldehyde-3-phosphate dehydrogenase B subunit	AT1G42970.1	B7MMA9	AT1G42970.1 | Symbols: GAPB | glyceraldehyde-3-phosphate dehydrogenase B subunit | chr1:16127552-16129584 FORWARD LENGTH=447	D-erythrose-4-phosphate dehydrogenase OS=Escherichia coli O45:K1 (strain S88 / ExPEC) GN=epd PE=3 SV=1	Chloroplast;	29.7136	29.6074	29.7395	29.8548	30.0543	30.0221	29.3676	29.4369	29.5732	29.7407	30.0188	30.0384	2	53	48.104	6.46	-0.0552106	0	303.45
Pg_S0476.9	Zinc-binding alcohol dehydrogenase family protein	AT5G42250.1	B7NES3	AT5G42250.1 | Symbols: | Zinc-binding alcohol dehydrogenase family protein | chr5:16894087-16897450 FORWARD LENGTH=390	L-threonine 3-dehydrogenase OS=Escherichia coli O17:K52:H18 (strain UMN026 / ExPEC) GN=tdh PE=3 SV=1	Cytoplasmic; Chloroplast;	27.0669	27.0702	26.7038	25.589	25.7798	25.7232	26.089	26.2231	25.9859	25.8653	25.7641	25.8527	5	18.3	41.957	5.407	0.0390181	0	19.822
Pg_S0488.16	Actin-like ATPase superfamily protein	AT1G30540.1	Q54PM7	AT1G30540.1 | Symbols: | Actin-like ATPase superfamily protein | chr1:10816951-10819172 REVERSE LENGTH=351	N-acetyl-D-glucosamine kinase OS=Dictyostelium discoideum GN=nagk PE=3 SV=2	Mitochondrial;	27.3943	27.635	27.4581	28.2535	27.9436	28.0125	28.0784	28.1388	28.0384	28.1496	28.1733	28.1373	14	39.4	56.151	6.302	-0.00019305	0	97.691
Pg_S0488.18	alpha/beta-Hydrolases superfamily protein	AT4G16820.1	Q9P979	AT4G16820.1 | Symbols: PLA-I{beta]2 | alpha/beta-Hydrolases superfamily protein | chr4:9467563-9469116 FORWARD LENGTH=517	Feruloyl esterase A OS=Aspergillus awamori GN=faeA PE=1 SV=3	Chloroplast;	27.0111	26.4697	26.26	27.9611	28.1007	28.0417	26.9873	26.9348	27.0591	27.8843	27.6825	27.93	9	39.7	42.175	6.375	-0.266053	0	74.783
Pg_S0488.29	post-illumination chlorophyll fluorescence increase	AT3G15840.1	-	AT3G15840.1 | Symbols: PIFI | post-illumination chlorophyll fluorescence increase | chr3:5356782-5358418 REVERSE LENGTH=268	-	Chloroplast;	26.8182	26.8876	26.7732	25.792	25.7686	26.001	26.4731	26.5342	26.2706	26.2778	26.203	26.1606	6	22	31.441	7.643	-0.258885	0	23.896
Pg_S0490.12	Uridine diphosphate glycosyltransferase 74E2	AT1G05680.1	P41713	AT1G05680.1 | Symbols: UGT74E2 | Uridine diphosphate glycosyltransferase 74E2 | chr1:1703196-1704639 REVERSE LENGTH=453	Ecdysteroid UDP-glucosyltransferase OS=Lymantria dispar multicapsid nuclear polyhedrosis virus GN=EGT PE=3 SV=2	Plasmamembrane; Cytoplasmic;	25.4223	25.7265	25.7818	26.2818	26.3787	26.4405	25.72	25.8668	25.6393	26.3236	26.1017	26.1252	3	14.2	51.148	5.589	-0.114192	0	8.6877
Pg_S2935.3	Protein kinase superfamily protein	AT2G24360.1	P54757	AT2G24360.1 | Symbols: | Protein kinase superfamily protein | chr2:10364742-10366075 REVERSE LENGTH=411	Ephrin type-A receptor 5 OS=Rattus norvegicus GN=Epha5 PE=1 SV=1	Cytoplasmic; Mitochondrial;	24.4487	24.9772	24.7325	26.0273	26.1715	26.1241	24.9969	25.2019	25.2793	26.0978	25.9008	25.983	7	32.9	40.079	7.645	-0.235359	0	16.936
Pg_S0493.34	GYF domain-containing protein	AT5G42950.1	-	AT5G42950.1 | Symbols: | GYF domain-containing protein | chr5:17224436-17231044 FORWARD LENGTH=1714	-	Nuclear;	30.2646	30.1641	30.1825	29.454	29.3753	29.2712	29.9657	29.9764	30.3148	29.4418	29.3058	29.4389	10	6.5	208.58	5.887	-0.755638	0	162.41
Pg_S0493.5	clathrin adaptor complexes medium subunit family protein	AT5G05010.1	P43621	AT5G05010.1 | Symbols: | clathrin adaptor complexes medium subunit family protein | chr5:1477137-1479872 FORWARD LENGTH=527	Coatomer subunit delta OS=Saccharomyces cerevisiae (strain ATCC 204508 / S288c) GN=RET2 PE=1 SV=3	Golgi;	29.5482	29.5982	29.5226	28.0205	28.0977	28.1002	27.6343	27.4164	28.0172	28.0141	28.0289	28.0399	5	40.1	58.121	5.304	-0.281285	0	85.725
Pg_S0493.8	chloroplast heat shock protein 70-2	AT5G49910.1	P0CS91	AT5G49910.1 | Symbols: CPHSC70-2EAT SHOCK PROTEIN 70-2, HSC70-7, cpHsc70-2 | chloroplast heat shock protein 70-2 | chr5:20303470-20306295 FORWARD LENGTH=718	Heat shock protein SSC1, mitochondrial OS=Saccharomyces cerevisiae GN=SSC1 PE=1 SV=1	Mitochondrial; Chloroplast;	29.7083	29.784	29.7458	28.6662	28.7529	28.5576	30.5531	30.5755	30.6399	28.835	28.475	28.5786	9	46.9	75.676	5.3	-0.319492	0	163.01
Pg_S1276.5	alanine:glyoxylate aminotransferase	AT2G13360.1	A0KJL8	AT2G13360.1 | Symbols: AGT, AGT1, SGAT | alanine:glyoxylate aminotransferase | chr2:5539417-5540902 REVERSE LENGTH=401	2-aminoethylphosphonate--pyruvate transaminase OS=Aeromonas hydrophila subsp. hydrophila (strain ATCC 7966 / NCIB 9240) GN=phnW PE=3 SV=1	Plasmamembrane; Peroxisomal;	27.2278	27.3664	27.29	29.7987	29.9971	29.6303	28.8317	28.7116	28.8687	29.8731	30.0697	29.8053	7	71.6	44.032	7.332	0.0892768	0	112.31
Pg_S0496.20	2-oxoglutarate dehydrogenase, E1 component	AT3G55410.1	A0PVU7	AT3G55410.1 | Symbols: | 2-oxoglutarate dehydrogenase, E1 component | chr3:20541897-20545728 FORWARD LENGTH=1017	Multifunctional 2-oxoglutarate metabolism enzyme OS=Mycobacterium ulcerans (strain Agy99) GN=kgd PE=3 SV=1	Cytoplasmic; Mitochondrial;	30.7105	30.5616	30.5962	30.0565	30.0861	30.0209	29.4519	29.4009	29.4286	29.8566	29.8236	29.7617	14	41.6	115.64	6.474	-0.426151	0	323.31
Pg_S0500.21	Neutral/alkaline non-lysosomal ceramidase	AT5G58980.1	O06769	AT5G58980.1 | Symbols: | Neutral/alkaline non-lysosomal ceramidase | chr5:23811449-23814395 REVERSE LENGTH=733	Neutral ceramidase OS=Mycobacterium tuberculosis (strain ATCC 25618 / H37Rv) GN=Rv0669c PE=1 SV=1	Extracellular;	27.9459	27.7919	27.8822	25.8217	25.9643	25.7377	24.6261	24.9042	24.0054	25.8665	25.8359	25.97	1	16	85.423	7.397	-0.18359	0	18.121
Pg_S0505.8	translocon at the outer envelope membrane of chloroplasts 75-III	AT3G46740.1	A2X208	AT3G46740.1 | Symbols: TOC75-III, MAR1 | translocon at the outer envelope membrane of chloroplasts 75-III | chr3:17216104-17219296 REVERSE LENGTH=818	Outer envelope protein 80, chloroplastic OS=Oryza sativa subsp. indica GN=OEP80 PE=3 SV=1	Chloroplast;	28.9557	28.9088	29.2361	28.0196	28.2689	28.2273	28.8752	28.9874	29.1484	27.9364	28.0611	28.0219	3	36.1	89.174	8.586	-0.356532	0	143.17
Pg_S0506.12	thioredoxin family protein	AT4G04950.1	Q9X2T1	AT4G04950.1 | Symbols: | thioredoxin family protein | chr4:2517882-2519924 REVERSE LENGTH=488	Thioredoxin OS=Pseudomonas aeruginosa (strain ATCC 15692 / PAO1 / 1C / PRS 101 / LMG 12228) GN=trxA PE=3 SV=1	ER;	27.1993	26.9903	26.9293	28.1364	28.2014	28.278	27.5669	27.4997	27.6368	28.8988	28.6369	28.6623	3	29.9	39.004	5.676	-0.218156	0	72.03
Pg_S0516.25	ATP synthase subunit beta	ATCG00480.1	P56480	ATCG00480.1 | Symbols: ATPB, PB | ATP synthase subunit beta | chrC:52660-54156 REVERSE LENGTH=498	ATP synthase subunit beta, mitochondrial OS=Mus musculus GN=Atp5b PE=1 SV=2	Chloroplast;	33.4869	33.2983	33.3781	35.0317	35.1044	35.1052	34.875	34.8331	34.7916	34.909	34.9469	34.835	26	90.8	49.714	4.827	-0.051634	0	323.31
Pg_S1885.16	RAB GTPase homolog E1B	AT4G20360.1	B6JN44	AT4G20360.1 | Symbols: ATRAB8D, ATRABE1B, RABE1b | RAB GTPase homolog E1B | chr4:10990036-10991466 FORWARD LENGTH=476	Elongation factor Tu OS=Helicobacter pylori (strain P12) GN=tuf PE=3 SV=1	Chloroplast;	30.6286	30.2771	30.3918	31.7497	31.6908	31.6984	33.4527	33.4302	33.3123	31.3972	31.3989	31.4003	16	60.3	52.842	6.27	-0.167284	0	323.31
Pg_S0524.5	Sec23/Sec24 protein transport family protein	AT1G05520.1	P38769	AT1G05520.1 | Symbols: | Sec23/Sec24 protein transport family protein | chr1:1631126-1635703 REVERSE LENGTH=783	Uncharacterized protein YHR035W OS=Saccharomyces cerevisiae (strain ATCC 204508 / S288c) GN=YHR035W PE=1 SV=1	Plasmamembrane;	28.3804	28.5939	28.435	27.6058	27.0398	27.3298	26.3219	26.4938	26.1281	27.325	27.4797	27.1979	6	34.2	84.239	5.469	-0.0570496	0	91.008
Pg_S0528.8	receptor for activated C kinase 1C	AT3G18130.1	B2B766	AT3G18130.1 | Symbols: RACK1C_AT | receptor for activated C kinase 1C | chr3:6211109-6212371 REVERSE LENGTH=326	Nuclear distribution protein PAC1-2 OS=Podospora anserina (strain S / ATCC MYA-4624 / DSM 980 / FGSC 10383) GN=PAC1-2 PE=3 SV=1	Extracellular; Cytoplasmic;	29.7654	29.6792	29.6893	29.323	29.3366	29.4097	30.6174	30.6797	30.5051	29.3569	29.6088	29.3319	1	61.1	36.052	6.693	-0.0920973	0	323.31
Pg_S0614.61	Histone superfamily protein	AT5G59970.1	P80738	AT5G59970.1 | Symbols: | Histone superfamily protein | chr5:24146352-24146663 REVERSE LENGTH=103	Histone H4 (Fragment) OS=Blepharisma japonicum PE=1 SV=2	Nuclear;	25.5742	26.3134	25.6051	28.9016	28.7332	28.4828	30.0919	30.1432	30.2856	29.9974	29.4062	29.9809	2	17.6	14.995	10.49	-0.696324	0	23.488
Pg_S0534.71	phosphate transporter 3;1	AT5G14040.1	P23641	AT5G14040.1 | Symbols: PHT3;1 | phosphate transporter 3;1 | chr5:4531059-4532965 REVERSE LENGTH=375	Mitochondrial phosphate carrier protein OS=Saccharomyces cerevisiae (strain ATCC 204508 / S288c) GN=MIR1 PE=1 SV=1	Plasmamembrane; Chloroplast;	27.3329	27.4062	27.4587	29.2906	29.1938	29.1931	29.4375	29.2665	29.6414	28.1781	28.3205	28.231	4	51.3	39.841	8.679	0.209626	0	99.454
Pg_S0536.31	elongation factor P (EF-P) family protein	AT3G08740.1	Q2FY41	AT3G08740.1 | Symbols: | elongation factor P (EF-P) family protein | chr3:2654788-2656154 REVERSE LENGTH=236	Elongation factor P OS=Staphylococcus aureus (strain NCTC 8325) GN=efp PE=3 SV=1	Chloroplast;	25.0479	25.2173	25.12	27.1107	27.044	27.3046	26.5921	26.4452	26.2669	27.0115	26.9822	27.0871	6	34.2	26.275	8.587	-0.251055	0	17.002
Pg_S0544.32	Nucleotide-diphospho-sugar transferases superfamily protein	AT2G37090.1	Q9CW73	AT2G37090.1 | Symbols: IRX9 | Nucleotide-diphospho-sugar transferases superfamily protein | chr2:15587671-15589223 REVERSE LENGTH=351	Galactosylgalactosylxylosylprotein 3-beta-glucuronosyltransferase 1 OS=Mus musculus GN=B3gat1 PE=2 SV=2	Mitochondrial; Chloroplast;	25.0102	24.9369	24.7022	25.2892	25.4002	26.2485	27.2785	27.1258	27.3815	25.8997	26.1072	26.0825	7	28	35.04	8.073	-0.112893	0	31.544
Pg_S0544.41	MA3 domain-containing protein	AT5G63190.1	G5CEW6	AT5G63190.1 | Symbols: | MA3 domain-containing protein | chr5:25346145-25348563 FORWARD LENGTH=702	Eukaryotic translation initiation factor 4G OS=Triticum aestivum PE=1 SV=1	Cytoplasmic;	27.3068	27.202	27.2437	28.2847	27.9979	27.3646	26.6991	26.8173	26.6883	26.9035	27.0308	26.9147	2	12.5	121.58	5.174	-0.0961156	0	59.092
Pg_S0547.11	NAD(P)-binding Rossmann-fold superfamily protein	AT1G30620.1	Q31FG4	AT1G30620.1 | Symbols: HSR8, MUR4, UXE1 | NAD(P)-binding Rossmann-fold superfamily protein | chr1:10855496-10857970 FORWARD LENGTH=419	ADP-L-glycero-D-manno-heptose-6-epimerase OS=Thiomicrospira crunogena (strain XCL-2) GN=hldD PE=3 SV=1	Extracellular; Cytoplasmic;	25.9169	26.1284	25.788	27.1705	26.8457	26.9812	27.037	26.9619	27.2509	26.6996	26.2585	27.0679	9	41.6	35.648	6.306	-0.011315	0	85.431
Pg_S2198.2	4-(cytidine 5&apos;-phospho)-2-C-methyl-D-erithritol kinase	unknown	unknown	unknown	unknown	Chloroplast;	28.7635	27.8446	28.0776	26.9388	26.6736	26.8901	27.8595	27.9864	27.4896	26.2723	25.9697	26.3169	13	50.6	44.314	5.932	-0.16005	0	158.04
Pg_S6301.1	17.6 kDa class II heat shock protein	AT5G12020.1	Q72QA1	AT5G12020.1 | Symbols: HSP17.6II | 17.6 kDa class II heat shock protein | chr5:3882409-3882876 REVERSE LENGTH=155	Probable 15 kDa heat shock protein OS=Leptospira interrogans serogroup Icterohaemorrhagiae serovar copenhageni (strain Fiocruz L1-130) GN=hsp15 PE=3 SV=1	Cytoplasmic; Nuclear;	29.7409	28.9547	28.7741	29.9345	30.0627	29.9564	27.9059	28.0578	27.9052	29.2306	29.4266	29.3373	1	43.2	18.045	7.173	-0.446914	0	36.388
Pg_S0563.8	rubisco activase	AT2G39730.1	O28972	AT2G39730.1 | Symbols: RCA | rubisco activase | chr2:16570951-16573345 REVERSE LENGTH=474	Cell division cycle protein 48 homolog AF_1297 OS=Archaeoglobus fulgidus (strain ATCC 49558 / VC-16 / DSM 4304 / JCM 9628 / NBRC 100126) GN=AF_1297 PE=3 SV=1	Cytoplasmic; Chloroplast;	26.3379	26.6938	26.5354	27.2117	27.2229	26.956	26.9889	26.8548	27.1805	26.7242	26.8741	26.9612	4	55.2	54.973	7.871	-0.2668	0	51.642
Pg_S0564.1	Zinc-binding dehydrogenase family protein	AT5G37980.1	Q9C0Y6	AT5G37980.1 | Symbols: | Zinc-binding dehydrogenase family protein | chr5:15131405-15132940 FORWARD LENGTH=353	Zinc-type alcohol dehydrogenase-like protein PB24D3.08c OS=Schizosaccharomyces pombe (strain 972 / ATCC 24843) GN=SPAPB24D3.08c PE=3 SV=1	Cytoplasmic;	30.19	30.2003	30.1589	30.1183	30.0215	30.036	27.8057	27.5476	27.4645	29.8307	29.8234	29.7671	2	59	38.203	6.237	-0.0331395	0	153.51
Pg_S0575.29	ATP citrate lyase (ACL) family protein	AT2G20420.1	A1VUC0	AT2G20420.1 | Symbols: | ATP citrate lyase (ACL) family protein | chr2:8805574-8807858 FORWARD LENGTH=421	Succinyl-CoA ligase [ADP-forming] subunit beta OS=Polaromonas naphthalenivorans (strain CJ2) GN=sucC PE=3 SV=1	Cytoplasmic; Mitochondrial;	28.1862	27.916	27.9757	29.6062	29.4678	29.7278	28.9018	28.8474	28.5084	29.5789	29.7743	29.5583	1	45.7	45.375	6.478	-0.0369668	0	87.818
Pg_S1066.10	RNA-binding (RRM/RBD/RNP motifs) family protein	AT4G14300.1	Q6GLB5	AT4G14300.1 | Symbols: | RNA-binding (RRM/RBD/RNP motifs) family protein | chr4:8231179-8232785 FORWARD LENGTH=411	ELAV-like protein 1 OS=Xenopus tropicalis GN=elavl1 PE=2 SV=1	Nuclear;	27.9218	27.6062	27.5757	25.3473	25.6065	25.0794	27.8108	27.8116	27.6014	25.05	25.2545	24.9315	7	30.4	42.049	5.874	-0.670343	0	92.866
Pg_S0578.9	glyceraldehyde-3-phosphate dehydrogenase C subunit 1	AT3G04120.1	P99136	AT3G04120.1 | Symbols: GAPC, GAPC-1, GAPC1 | glyceraldehyde-3-phosphate dehydrogenase C subunit 1 | chr3:1081077-1083131 FORWARD LENGTH=338	Glyceraldehyde-3-phosphate dehydrogenase 1 OS=Staphylococcus aureus (strain N315) GN=gapA1 PE=1 SV=1	Cytoplasmic;	28.5259	28.2846	28.2629	28.4974	28.1668	28.1705	28.8199	28.6807	28.789	28.4913	28.5151	28.7367	2	66.8	31.759	7.937	-0.0874576	0	70.409
Pg_S0582.6	serine hydroxymethyltransferase 3	AT4G32520.1	Q9WZH9	AT4G32520.1 | Symbols: SHM3, AtSHMT3 | serine hydroxymethyltransferase 3 | chr4:15689642-15692334 REVERSE LENGTH=529	Serine hydroxymethyltransferase OS=Thermotoga maritima (strain ATCC 43589 / MSB8 / DSM 3109 / JCM 10099) GN=glyA PE=3 SV=1	Chloroplast;	27.3808	27.6051	27.328	27.7981	27.7002	27.6204	27.0232	26.9925	26.9923	27.5873	27.6657	27.5779	2	38.9	57.615	7.411	-0.150566	0	62.777
Pg_S0595.18	Nucleoside diphosphate kinase family protein	AT4G09320.1	Q8RBR5	AT4G09320.1 | Symbols: NDPK1 | Nucleoside diphosphate kinase family protein | chr4:5923424-5924366 FORWARD LENGTH=169	Nucleoside diphosphate kinase OS=Thermoanaerobacter tengcongensis (strain DSM 15242 / JCM 11007 / NBRC 100824 / MB4) GN=ndk PE=3 SV=1	Cytoplasmic; Chloroplast;	23.435	23.8852	23.7396	27.7917	27.5959	27.9259	25.6346	25.9972	25.6707	27.5843	26.9413	26.5873	3	80.4	16.352	7.31	-0.0547297	0	10.738
Pg_S0595.25	Hyaluronan / mRNA binding family	AT4G17520.1	-	AT4G17520.1 | Symbols: | Hyaluronan / mRNA binding family | chr4:9771496-9773313 FORWARD LENGTH=360	-	Nuclear;	28.0022	28.4229	28.2475	25.6921	25.6919	25.9332	28.2827	28.0042	28.0543	26.3968	26.301	26.2005	1	32	40.265	5.568	-1.23065	0	201.17
Pg_S0595.26	glycine-tRNA ligases	AT3G48110.1	Q4QLY1	AT3G48110.1 | Symbols: EDD1, EDD | glycine-tRNA ligases | chr3:17763111-17770964 FORWARD LENGTH=1067	Glycine--tRNA ligase alpha subunit OS=Haemophilus influenzae (strain 86-028NP) GN=glyQ PE=3 SV=1	Plasmamembrane; Cytoplasmic;	26.1682	25.7922	26.1147	26.4776	26.4563	26.2555	27.1394	26.7686	26.7748	26.4309	26.5787	26.6238	14	17.7	128.14	5.529	-0.112886	0	121.98
Pg_S0599.2	KH domain-containing protein	AT2G25970.1	Q96I24	AT2G25970.1 | Symbols: | KH domain-containing protein | chr2:11071844-11075604 REVERSE LENGTH=632	Far upstream element-binding protein 3 OS=Homo sapiens GN=FUBP3 PE=1 SV=2	Nuclear;	26.5929	26.3214	26.6498	24.4614	23.982	24.3367	25.5845	25.5432	25.4435	24.5751	25.0422	24.5515	2	10.2	77.095	4.812	-0.943672	0	26.114
Pg_S0605.8	NAD(P)-binding Rossmann-fold superfamily protein	AT1G30620.1	Q31FG4	AT1G30620.1 | Symbols: HSR8, MUR4, UXE1 | NAD(P)-binding Rossmann-fold superfamily protein | chr1:10855496-10857970 FORWARD LENGTH=419	ADP-L-glycero-D-manno-heptose-6-epimerase OS=Thiomicrospira crunogena (strain XCL-2) GN=hldD PE=3 SV=1	Cytoplasmic; Chloroplast;	27.728	27.9033	27.9013	30.5194	30.4693	30.5126	30.7336	30.7962	30.5495	30.7502	30.5747	30.5522	5	57.4	32.245	7.816	-0.248311	0	246.23
Pg_S0612.17	magnesium-protoporphyrin IX methyltransferase	AT4G25080.3	P26236	AT4G25080.3 | Symbols: CHLM | magnesium-protoporphyrin IX methyltransferase | chr4:12877015-12878128 FORWARD LENGTH=312	Magnesium-protoporphyrin O-methyltransferase OS=Rhodobacter capsulatus GN=bchM PE=1 SV=1	Chloroplast;	25.0192	25.2238	25.1253	26.5675	27.3538	27.3892	28.0619	28.0919	28.2751	27.9072	27.2334	27.2412	4	53	34.44	7.039	-0.106625	0	91.407
Pg_S0612.35	vacuolar ATP synthase subunit C (VATC) / V-ATPase C subunit / vacuolar proton pump C subunit (DET3)	AT1G12840.1	Q9HDW6	AT1G12840.1 | Symbols: DET3, ATVHA-C | vacuolar ATP synthase subunit C (VATC) / V-ATPase C subunit / vacuolar proton pump C subunit (DET3) | chr1:4375584-4378220 FORWARD LENGTH=375	V-type proton ATPase subunit C OS=Schizosaccharomyces pombe (strain 972 / ATCC 24843) GN=vma5 PE=1 SV=1	Extracellular; Nuclear;	27.1343	27.2205	27.1296	27.891	27.6561	27.9192	26.0188	26.4347	25.8917	27.9692	27.8096	27.8418	4	34.1	42.944	6.449	-0.368	0	28.474
Pg_S0612.5	S-adenosyl-L-methionine-dependent methyltransferases superfamily protein	AT1G73600.2	Q6ZIK0	AT1G73600.2 | Symbols: | S-adenosyl-L-methionine-dependent methyltransferases superfamily protein | chr1:27669224-27673400 FORWARD LENGTH=504	Probable tocopherol O-methyltransferase, chloroplastic OS=Oryza sativa subsp. japonica GN=VTE4 PE=2 SV=1	Cytoplasmic;	27.8416	27.8368	27.3742	25.3139	25.5908	25.3698	26.522	26.8108	26.5911	25.5896	25.1807	24.4096	4	25	84.799	5.467	-0.430574	0	49.577
Pg_S0615.6	glutamate-1-semialdehyde 2,1-aminomutase 2	AT3G48730.1	A0KZS6	AT3G48730.1 | Symbols: GSA2 | glutamate-1-semialdehyde 2,1-aminomutase 2 | chr3:18049697-18051550 FORWARD LENGTH=472	Glutamate-1-semialdehyde 2,1-aminomutase OS=Shewanella sp. (strain ANA-3) GN=hemL PE=3 SV=1	Mitochondrial; Chloroplast;	28.7749	28.5215	28.7147	29.2118	29.3175	29.235	31.9395	31.981	31.7548	29.0042	28.9842	29.0991	3	62.2	51.04	5.779	-0.0573529	0	323.31
Pg_S0616.8	Protein of unknown function (DUF3411)	AT5G12470.1	-	AT5G12470.1 | Symbols: | Protein of unknown function (DUF3411) | chr5:4044950-4047290 REVERSE LENGTH=386	-	Cytoplasmic; Mitochondrial;	27.118	27.0824	27.1926	27.6851	27.8006	28.2761	26.0621	24.8328	25.6849	28.3333	28.574	28.5645	6	23.7	24.233	7.045	-0.317674	0	39.341
Pg_S6435.1	Ribosomal protein L1p/L10e family	AT3G58660.1	Q9VTP4	AT3G58660.1 | Symbols: | Ribosomal protein L1p/L10e family | chr3:21701574-21702914 FORWARD LENGTH=446	60S ribosomal protein L10a-2 OS=Drosophila melanogaster GN=RpL10Ab PE=1 SV=2	Mitochondrial; Chloroplast;	25.2652	25.4807	25.3276	27.1878	26.7041	26.6617	27.8081	27.6952	27.7731	28.379	28.2975	28.3496	13	35.9	38.547	9.698	-0.342165	0	74.949
Pg_S5818.1	tubulin beta 8	AT5G23860.1	P33623	AT5G23860.1 | Symbols: TUB8 | tubulin beta 8 | chr5:8042962-8044528 FORWARD LENGTH=449	Tubulin alpha-1 chain OS=Anemia phyllitidis GN=TUBA1 PE=2 SV=1	Cytoplasmic;	30.1263	29.641	29.66	28.452	28.1388	28.6776	28.2041	28.2675	28.5222	28.0388	27.933	28.1705	2	76.2	49.981	4.544	-0.394831	0	90.744
Pg_S0624.14	thioredoxin H-type 1	AT3G51030.1	O22229	AT3G51030.1 | Symbols: ATTRX1, ATTRX H1, TRX1 | thioredoxin H-type 1 | chr3:18951123-18951955 REVERSE LENGTH=114	NADPH-dependent thioredoxin reductase 3 OS=Arabidopsis thaliana GN=NTRC PE=1 SV=2	Cytoplasmic;	27.5848	27.5367	27.5888	29.3707	29.3065	29.0955	28.8791	28.9954	28.9356	29.5763	29.5695	29.3662	2	56.9	13.554	5.624	-0.104065	0	48.614
Pg_S0624.8	phosphoglycerate kinase	AT1G79550.1	O83549	AT1G79550.1 | Symbols: PGK | phosphoglycerate kinase | chr1:29924347-29926295 REVERSE LENGTH=401	Phosphoglycerate kinase OS=Treponema pallidum (strain Nichols) GN=pgk PE=3 SV=1	Cytoplasmic; Chloroplast;	23.5698	23.8185	24.0273	26.6317	26.9489	26.1667	25.6571	26.1287	25.9183	27.8784	26.246	27.0885	1	60.1	42.273	6.634	0.119701	0	11.489
Pg_S3412.3	RNA-binding (RRM/RBD/RNP motifs) family protein	AT4G14300.1	Q6GLB5	AT4G14300.1 | Symbols: | RNA-binding (RRM/RBD/RNP motifs) family protein | chr4:8231179-8232785 FORWARD LENGTH=411	ELAV-like protein 1 OS=Xenopus tropicalis GN=elavl1 PE=2 SV=1	Nuclear;	26.5502	26.6413	26.8883	24.3368	24.6592	25.0728	26.8341	25.8194	26.51	24.9562	25.1832	24.9461	6	34.7	36.381	8.597	-0.619075	0	72.277
Pg_S0635.2	light harvesting complex of photosystem II 5	AT4G10340.1	Q39709	AT4G10340.1 | Symbols: LHCB5 | light harvesting complex of photosystem II 5 | chr4:6408200-6409496 FORWARD LENGTH=280	Fucoxanthin-chlorophyll a-c binding protein, chloroplastic OS=Isochrysis galbana GN=FCP PE=1 SV=1	Chloroplast;	29.0398	27.9873	28.2296	31.393	30.9817	31.0721	30.7871	30.8091	30.7978	30.2686	30.4701	30.4132	2	51.4	30.573	5.173	0.00243056	0	129.71
Pg_S0640.7	biotin/lipoyl attachment domain-containing protein	AT3G56130.1	-	AT3G56130.1 | Symbols: | biotin/lipoyl attachment domain-containing protein | chr3:20826852-20829007 FORWARD LENGTH=281	-	Mitochondrial; Chloroplast;	27.4202	27.7012	27.3969	26.3133	26.4414	26.0556	26.4737	26.9195	26.5866	26.2134	26.4941	26.8383	5	35.8	30.294	8.453	-0.139298	0	25.077
Pg_S0642.7	D-ribulose-5-phosphate-3-epimerase	AT5G61410.1	P47358	AT5G61410.1 | Symbols: RPE, EMB2728 | D-ribulose-5-phosphate-3-epimerase | chr5:24684085-24685836 REVERSE LENGTH=281	Probable ribulose-phosphate 3-epimerase OS=Mycoplasma genitalium (strain ATCC 33530 / G-37 / NCTC 10195) GN=rpe PE=3 SV=1	Chloroplast;	27.9852	27.6274	27.7826	27.8909	28.123	28.1278	28.2789	28.3013	28.4923	27.5703	27.6647	27.3508	1	31	30.254	7.836	0.244014	0	9.7672
Pg_S3540.2	light harvesting complex of photosystem II 5	AT4G10340.1	Q39709	AT4G10340.1 | Symbols: LHCB5 | light harvesting complex of photosystem II 5 | chr4:6408200-6409496 FORWARD LENGTH=280	Fucoxanthin-chlorophyll a-c binding protein, chloroplastic OS=Isochrysis galbana GN=FCP PE=1 SV=1	Chloroplast;	31.0363	30.6391	30.6013	33.3138	33.3422	33.3586	32.8849	32.8539	32.9895	33.4194	33.3354	33.4016	6	55.7	30.656	5.352	0.0754325	0	323.31
Pg_S0648.3	NAD(P)-binding Rossmann-fold superfamily protein	AT1G30620.1	Q31FG4	AT1G30620.1 | Symbols: HSR8, MUR4, UXE1 | NAD(P)-binding Rossmann-fold superfamily protein | chr1:10855496-10857970 FORWARD LENGTH=419	ADP-L-glycero-D-manno-heptose-6-epimerase OS=Thiomicrospira crunogena (strain XCL-2) GN=hldD PE=3 SV=1	Cytoplasmic;	26.289	27.6004	27.2837	28.5092	27.8252	27.908	26.2452	26.3008	26.2539	26.4832	26.9663	28.2683	2	34.9	34.262	7.912	-0.173077	0	43.403
Pg_S0649.16	copper/zinc superoxide dismutase 2	unknown	unknown	unknown	unknown	Chloroplast;	29.6047	29.9643	30.1594	27.475	27.4849	27.4009	32.1274	31.9673	31.9032	27.9224	27.7632	27.7104	2	40	22.45	6.154	0.0231818	0	323.31
Pg_S0649.4	mitochondrial HSO70 2	AT5G09590.1	Q0I3V2	AT5G09590.1 | Symbols: MTHSC70-2, HSC70-5 | mitochondrial HSO70 2 | chr5:2975721-2978508 FORWARD LENGTH=682	Chaperone protein DnaK OS=Histophilus somni (strain 129Pt) GN=dnaK PE=3 SV=1	Cytoplasmic; Mitochondrial;	27.2658	27.1308	27.607	26.7338	26.6769	27.6034	24.9303	26.5659	27.0563	25.9609	26.1072	26.2392	3	27.1	109.38	5.867	-0.336491	0	18.36
Pg_S0652.5	chloroplast RNA binding	AT1G09340.1	Q9LYA9	AT1G09340.1 | Symbols: CRB, CSP41B, HIP1.3 | chloroplast RNA binding | chr1:3015473-3018035 FORWARD LENGTH=378	Chloroplast stem-loop binding protein of 41 kDa a, chloroplastic OS=Arabidopsis thaliana GN=CSP41A PE=1 SV=1	Cytoplasmic; Mitochondrial;	30.1621	30.3054	30.3452	32.6536	32.6321	32.5855	31.5103	31.4943	31.5725	32.7034	32.7088	32.6822	5	68.4	42.515	8.76	-0.249737	0	295.4
Pg_S0664.31	photosystem II reaction center protein A	ATCG00020.1	P05418	ATCG00020.1 | Symbols: PSBA | photosystem II reaction center protein A | chrC:383-1444 REVERSE LENGTH=353	Cytochrome b OS=Paracoccus denitrificans GN=petB PE=1 SV=1	Plasmamembrane;	25.8782	26.2217	26.2172	30.1368	30.2344	30.458	32.083	31.9863	32.0867	29.9598	29.791	29.8554	5	10.7	52.15	8.43	0.0415094	0	323.31
Pg_S0674.6	ubiquitin-protein ligase 1	AT1G55860.1	Q7TMY8	AT1G55860.1 | Symbols: UPL1 | ubiquitin-protein ligase 1 | chr1:20879900-20895393 REVERSE LENGTH=3930	E3 ubiquitin-protein ligase HUWE1 OS=Mus musculus GN=Huwe1 PE=1 SV=5	Plasmamembrane; Nuclear;	27.3999	27.1693	27.2432	26.3568	26.017	26.2907	26.1856	26.3378	26.1491	25.3278	24.4263	24.9815	1	8.8	404.39	4.864	-0.286372	0	46.491
Pg_S0680.16	light-harvesting chlorophyll-protein complex I subunit A4	AT3G47470.1	P12332	AT3G47470.1 | Symbols: LHCA4, CAB4 | light-harvesting chlorophyll-protein complex I subunit A4 | chr3:17493622-17494773 REVERSE LENGTH=251	Chlorophyll a-b binding protein, chloroplastic (Fragment) OS=Silene pratensis PE=2 SV=2	Chloroplast;	29.4749	29.5175	29.7098	30.6746	30.7499	30.8829	32.4501	32.4658	32.3877	30.2789	30.4699	30.0611	5	79.2	27.753	6.117	-0.146	0	323.31
Pg_S6158.6	branched-chain amino acid aminotransferase 5 / branched-chain amino acid transaminase 5 (BCAT5)	AT5G65780.2	Q9FLH0	AT5G65780.2 | Symbols: ATBCAT-5 | branched-chain amino acid aminotransferase 5 / branched-chain amino acid transaminase 5 (BCAT5) | chr5:26311587-26315610 FORWARD LENGTH=1018	Putative nuclear matrix constituent protein 1-like protein OS=Arabidopsis thaliana GN=At5g65770 PE=2 SV=1	Chloroplast;	25.5952	25.4663	25.5065	26.9392	26.8124	26.5562	26.4352	26.1512	26.5101	26.4929	26.562	26.2458	3	24.9	44.514	5.918	-0.0158537	0	22.953
Pg_S0681.4	HEAT SHOCK PROTEIN 81.4	AT5G56000.1	Q0VPG1	AT5G56000.1 | Symbols: Hsp81.4, AtHsp90.4 | HEAT SHOCK PROTEIN 81.4 | chr5:22677602-22680067 REVERSE LENGTH=699	Chaperone protein HtpG OS=Alcanivorax borkumensis (strain SK2 / ATCC 700651 / DSM 11573) GN=htpG PE=3 SV=1	Cytoplasmic;	31.0384	31.1061	31.0897	32.7488	32.8438	32.9019	32.885	32.8161	32.8415	32.5711	32.6149	32.5	1	62.7	80.217	4.833	-0.585837	0	323.31
Pg_S5750.2	Ribosomal L5P family protein	AT4G01310.1	A9VP89	AT4G01310.1 | Symbols: | Ribosomal L5P family protein | chr4:544166-545480 REVERSE LENGTH=262	50S ribosomal protein L5 OS=Bacillus weihenstephanensis (strain KBAB4) GN=rplE PE=3 SV=1	Mitochondrial;	28.5083	28.4173	28.6336	28.3413	28.5461	28.7118	29.0739	29.0934	29.2918	29.1955	29.0044	28.8969	12	55.7	29.137	10.448	-0.369318	0	167.47
Pg_S0682.30	Pseudouridine synthase/archaeosine transglycosylase-like family protein	AT1G19920.1	Q54506	AT1G19920.1 | Symbols: APS2, ASA1 | Pseudouridine synthase/archaeosine transglycosylase-like family protein | chr1:6914835-6916657 REVERSE LENGTH=476	Sulfate adenylyltransferase OS=Riftia pachyptila sulfur-oxidizing endosymbiont GN=sat PE=1 SV=1	Cytoplasmic; Mitochondrial; Chloroplast	27.5005	27.6105	27.7081	28.1407	28.1352	28.259	26.8799	27.07	26.9087	28.3695	28.1833	28.2015	4	42.6	52.832	6.653	-0.357203	0	64.946
Pg_S0684.29	Phosphofructokinase family protein	AT1G12000.1	O51669	AT1G12000.1 | Symbols: | Phosphofructokinase family protein | chr1:4050159-4053727 REVERSE LENGTH=566	ATP-dependent 6-phosphofructokinase OS=Borrelia burgdorferi (strain ATCC 35210 / B31 / CIP 102532 / DSM 4680) GN=pfkA PE=3 SV=2	Cytoplasmic; Mitochondrial;	27.6237	27.2505	27.2521	28.0674	28.1798	28.175	28.695	28.8063	28.5332	28.1684	28.2177	28.1042	3	45.4	66.936	6.719	-0.120195	0	191.94
Pg_S0688.7	alcohol dehydrogenase 1	AT1G77120.1	B4SXB9	AT1G77120.1 | Symbols: ADH1, ADH, ATADH, ATADH1 | alcohol dehydrogenase 1 | chr1:28975509-28977216 FORWARD LENGTH=379	L-threonine 3-dehydrogenase OS=Salmonella newport (strain SL254) GN=tdh PE=3 SV=1	Cytoplasmic;	28.4267	28.2695	28.4396	27.9534	28.0064	28.0225	27.0265	27.1761	26.8877	27.8736	27.8757	28.0838	10	28.8	41.075	5.981	0.0316623	0	34.833
Pg_S0693.8	NAD(P)-linked oxidoreductase superfamily protein	AT1G59960.1	P78736	AT1G59960.1 | Symbols: | NAD(P)-linked oxidoreductase superfamily protein | chr1:22071410-22073067 REVERSE LENGTH=326	NAD(P)H-dependent D-xylose reductase OS=Pachysolen tannophilus GN=XYL1 PE=1 SV=1	Mitochondrial; Chloroplast;	28.0707	28.1368	27.908	30.2924	30.5794	30.3834	28.536	28.4516	28.1816	30.2754	30.3882	30.2639	1	39.9	47.544	7.961	-0.347268	0	94.597
Pg_S0700.3	phototropin 2	AT5G58140.2	B4QK53	AT5G58140.2 | Symbols: PHOT2, NPL1 | phototropin 2 | chr5:23524771-23529993 FORWARD LENGTH=915	Serine/threonine-protein kinase PLK4 OS=Drosophila simulans GN=SAK PE=3 SV=1	Cytoplasmic; Nuclear;	28.1023	28.3598	28.0974	26.8654	26.931	27.0283	27.187	26.915	26.9986	26.8289	26.8757	26.7966	2	23.6	101.54	7.115	-0.518091	0	76.315
Pg_S0705.1	Regulator of chromosome condensation (RCC1) family protein	AT3G02300.1	Q6NRS1	AT3G02300.1 | Symbols: | Regulator of chromosome condensation (RCC1) family protein | chr3:461551-463929 FORWARD LENGTH=471	Inhibitor of Bruton tyrosine kinase OS=Xenopus laevis GN=ibtk PE=2 SV=1	Cytoplasmic; Nuclear;	27.7003	27.7239	27.5767	25.9061	25.2021	25.8785	26.5211	26.8251	26.1446	24.9576	25.3732	25.8201	13	40.2	47.875	5.521	-0.410337	0	41.327
Pg_S0710.7	rotamase FKBP 1	AT3G25230.2	P20080	AT3G25230.2 | Symbols: ROF1, ATFKBP62, FKBP62 | rotamase FKBP 1 | chr3:9188257-9191175 FORWARD LENGTH=562	FK506-binding protein 1A OS=Neurospora crassa (strain ATCC 24698 / 74-OR23-1A / CBS 708.71 / DSM 1257 / FGSC 987) GN=fkr-2 PE=1 SV=1	Cytoplasmic; ER; Nuclear	29.5963	29.429	29.4819	29.1121	28.9315	28.8901	30.1173	30.0256	29.8743	28.9281	28.7702	28.8832	2	34.5	63.873	5.073	-0.629965	0	223.14
Pg_S2924.18	Adaptor protein complex AP-2, alpha subunit	AT5G22780.1	P63010	AT5G22780.1 | Symbols: | Adaptor protein complex AP-2, alpha subunit | chr5:7590100-7597828 REVERSE LENGTH=1013	AP-2 complex subunit beta OS=Homo sapiens GN=AP2B1 PE=1 SV=1	Golgi;	24.7739	24.9417	24.8697	24.8245	24.8557	25.0741	25.3227	25.3888	25.4798	24.7596	24.6425	24.7858	6	9.1	113.33	5.783	-0.112303	0	22.507
Pg_S0722.1	ribonuclease 1	AT2G02990.1	Q02933	AT2G02990.1 | Symbols: RNS1, ATRNS1 | ribonuclease 1 | chr2:873714-874667 FORWARD LENGTH=230	Ribonuclease T2-like OS=Saccharomyces cerevisiae (strain ATCC 204508 / S288c) GN=RNY1 PE=1 SV=1	Extracellular; Plasmamembrane;	31.8305	32.0318	32.2383	30.2134	29.9485	29.9366	24.5437	24.221	25.0722	30.2894	29.812	30.0406	5	23.4	25.911	7.213	-0.0813853	0	71.194
Pg_S0722.7	Citrate synthase family protein	AT2G44350.2	Q8NSH7	AT2G44350.2 | Symbols: ATCS, CSY4 | Citrate synthase family protein | chr2:18316673-18320524 FORWARD LENGTH=474	2-methylcitrate synthase 1 OS=Corynebacterium glutamicum (strain ATCC 13032 / DSM 20300 / JCM 1318 / LMG 3730 / NCIMB 10025) GN=prpC1 PE=1 SV=1	Mitochondrial;	27.16	27.4676	27.1255	28.4576	28.3767	28.4437	25.7039	25.6577	25.3425	28.6557	28.5405	28.7471	7	39	51.003	7.141	-0.200658	0	45.484
Pg_S0724.10	heat shock protein 91	AT1G79930.1	Q1LST3	AT1G79930.1 | Symbols: HSP91 | heat shock protein 91 | chr1:30063781-30067067 REVERSE LENGTH=831	Chaperone protein DnaK OS=Baumannia cicadellinicola subsp. Homalodisca coagulata GN=dnaK PE=3 SV=1	Cytoplasmic;	31.6917	31.6738	31.7233	30.5229	30.4782	30.4654	29.7516	29.7863	29.8285	30.5943	30.5728	30.4999	4	49.2	93.4	4.921	-0.406856	0	318.26
Pg_S0724.21	D-isomer specific 2-hydroxyacid dehydrogenase family protein	AT1G72190.1	A9R7V0	AT1G72190.1 | Symbols: | D-isomer specific 2-hydroxyacid dehydrogenase family protein | chr1:27167458-27169696 REVERSE LENGTH=373	Erythronate-4-phosphate dehydrogenase OS=Yersinia pestis bv. Antiqua (strain Angola) GN=pdxB PE=3 SV=1	Cytoplasmic; Chloroplast;	26.9869	26.6079	26.7843	28.7753	28.667	28.3151	27.5414	27.4791	27.4049	28.1778	28.1346	28.2705	12	54	34.017	5.779	0.0964856	0	56.867
Pg_S2708.16	GTP cyclohydrolase II	AT5G64300.1	Q32GQ6	AT5G64300.1 | Symbols: ATGCH, GCH, ATRIBA1, RFD1 | GTP cyclohydrolase II | chr5:25718459-25720790 FORWARD LENGTH=543	GTP cyclohydrolase-2 OS=Shigella dysenteriae serotype 1 (strain Sd197) GN=ribA PE=3 SV=1	Mitochondrial; Chloroplast;	25.3985	25.5896	26.4969	25.5931	25.198	25.1933	25.6937	24.8739	25.3726	25.7659	25.3907	25.1982	5	13.7	59.763	6.258	-0.227505	0	25.838
Pg_S2383.7	3-ketoacyl-acyl carrier protein synthase I	AT5G46290.3	Q83E37	AT5G46290.3 | Symbols: KASI | 3-ketoacyl-acyl carrier protein synthase I | chr5:18774439-18776629 REVERSE LENGTH=489	3-oxoacyl-[acyl-carrier-protein] synthase 2 OS=Coxiella burnetii (strain RSA 493 / Nine Mile phase I) GN=fabF PE=1 SV=1	Chloroplast;	28.245	27.6937	27.7895	27.289	27.3216	27.1321	28.3499	28.4837	28.6565	26.9653	26.827	26.6501	5	35.6	49.58	7.705	-0.190343	0	73.01
Pg_S0731.6	ureidoglycolate hydrolases	AT2G35820.1	-	AT2G35820.1 | Symbols: | ureidoglycolate hydrolases | chr2:15050933-15052004 FORWARD LENGTH=192	-	Cytoplasmic;	26.555	26.7729	26.8442	25.1437	25.9252	25.9876	25.945	26.0573	26.3147	25.3945	25.533	25.3054	7	48.4	21.332	7.34	-0.381771	0	20.217
Pg_S0785.11	O-acetylserine (thiol) lyase (OAS-TL) isoform A1	AT4G14880.1	Q2YUU0	AT4G14880.1 | Symbols: OASA1, OLD3, CYTACS1 | O-acetylserine (thiol) lyase (OAS-TL) isoform A1 | chr4:8518209-8520050 REVERSE LENGTH=322	Probable siderophore biosynthesis protein SbnA OS=Staphylococcus aureus (strain bovine RF122 / ET3-1) GN=sbnA PE=3 SV=1	Cytoplasmic;	27.3132	27.3738	27.6013	28.388	28.0357	28.2291	26.2311	26.045	26.8024	28.2005	28.0883	28.1297	7	60.3	34.234	5.083	0.152	0	54.448
Pg_S4627.23	Ribosomal protein S4 (RPS4A) family protein	AT5G58420.1	Q6L1B5	AT5G58420.1 | Symbols: | Ribosomal protein S4 (RPS4A) family protein | chr5:23619599-23620896 FORWARD LENGTH=262	30S ribosomal protein S4e OS=Picrophilus torridus (strain ATCC 700027 / DSM 9790 / JCM 10055 / NBRC 100828) GN=rps4e PE=3 SV=1	Cytoplasmic; Mitochondrial;	27.2596	27.2838	27.4172	29.0043	29.1668	29.1999	29.4544	29.5147	29.3775	29.5907	29.529	29.4827	1	44.7	29.879	10.578	-0.463258	0	94.736
Pg_S5054.4	Mog1/PsbP/DUF1795-like photosystem II reaction center PsbP family protein	AT1G69680.1	O75002	AT1G69680.1 | Symbols: | Mog1/PsbP/DUF1795-like photosystem II reaction center PsbP family protein | chr1:26205148-26206568 FORWARD LENGTH=202	Nuclear import protein mog1 OS=Schizosaccharomyces pombe (strain 972 / ATCC 24843) GN=mog1 PE=3 SV=1	Chloroplast;	27.3449	27.501	27.3492	28.0795	28.2725	28.078	27.6308	26.9547	27.7477	27.1309	26.9619	26.6144	6	36.3	28.515	7.684	-0.173664	0	31.627
Pg_S0741.47	glutamate synthase 1	AT5G04140.2	O87392	AT5G04140.2 | Symbols: GLU1, GLS1, GLUS, FD-GOGAT | glutamate synthase 1 | chr5:1130031-1138186 FORWARD LENGTH=1648	Glutamate synthase large subunit-like protein OS=Rhizobium meliloti (strain 1021) GN=glxD PE=3 SV=2	Chloroplast;	31.8132	30.7203	30.9317	30.2255	30.1689	30.2581	28.8401	28.7591	28.6422	29.7651	29.7626	29.2756	7	53.2	171.76	6.224	-0.147378	0	142.54
Pg_S2936.6	ATP phosphoribosyl transferase 2	AT1G09795.1	Q49776	AT1G09795.1 | Symbols: ATATP-PRT2, HISN1B, ATP-PRT2 | ATP phosphoribosyl transferase 2 | chr1:3173588-3176690 FORWARD LENGTH=413	ATP phosphoribosyltransferase OS=Mycobacterium leprae (strain TN) GN=hisG PE=3 SV=1	Cytoplasmic; Chloroplast;	26.0042	25.2282	26.1765	27.6673	27.5927	27.0397	27.7552	27.5644	27.7044	26.1019	26.0358	26.1119	10	36.4	43.472	5.429	0.00631313	0	116.22
Pg_S0745.4	regulatory particle triple-A ATPase 6A	AT5G19990.1	Q3ZBT1	AT5G19990.1 | Symbols: RPT6A, ATSUG1 | regulatory particle triple-A ATPase 6A | chr5:6752144-6754918 FORWARD LENGTH=419	Transitional endoplasmic reticulum ATPase OS=Bos taurus GN=VCP PE=2 SV=1	Cytoplasmic; Mitochondrial;	28.2954	28.4026	28.6475	29.696	29.889	29.5566	28.8013	28.8671	29.0504	29.6436	29.5042	29.4461	17	56.2	46.943	8.705	-0.357656	0	323.31
Pg_S0747.22	beta-ureidopropionase	AT5G64370.1	Q3HVN1	AT5G64370.1 | Symbols: BETA-UP, PYD3 | beta-ureidopropionase | chr5:25739264-25741031 FORWARD LENGTH=408	N-carbamoylputrescine amidase OS=Solanum tuberosum GN=CPA PE=2 SV=1	Cytoplasmic;	30.4463	30.4589	30.3747	29.2932	29.3199	29.383	29.893	29.8566	29.8838	29.2882	29.2576	29.2279	21	75.6	48.218	5.903	-0.308372	0	323.31
Pg_S0747.44	Threonyl-tRNA synthetase	AT5G26830.1	A3QEK0	AT5G26830.1 | Symbols: | Threonyl-tRNA synthetase | chr5:9437351-9441568 FORWARD LENGTH=709	Threonine--tRNA ligase OS=Shewanella loihica (strain ATCC BAA-1088 / PV-4) GN=thrS PE=3 SV=1	Cytoplasmic;	25.3652	25.3637	25.4715	26.1155	26.0579	25.9674	26.3503	26.265	26.2006	25.9248	25.9541	26.0296	6	25.1	79.057	6.18	-0.468222	0	40.449
Pg_S2472.11	Adaptor protein complex AP-1, gamma subunit	AT1G60070.2	Q8I8U2	AT1G60070.2 | Symbols: | Adaptor protein complex AP-1, gamma subunit | chr1:22142944-22149296 REVERSE LENGTH=898	AP-1 complex subunit gamma OS=Dictyostelium discoideum GN=ap1g1 PE=1 SV=1	Golgi;	25.2277	24.9223	24.7609	25.0479	25.1548	24.6643	24.7642	25.1045	25.2158	25.0541	24.7894	25.0802	5	10.4	96.544	5.859	-0.0762828	0	10.77
Pg_S0747.8	mitochondrial HSO70 2	AT5G09590.1	Q0I3V2	AT5G09590.1 | Symbols: MTHSC70-2, HSC70-5 | mitochondrial HSO70 2 | chr5:2975721-2978508 FORWARD LENGTH=682	Chaperone protein DnaK OS=Histophilus somni (strain 129Pt) GN=dnaK PE=3 SV=1	Mitochondrial;	29.9739	30.0158	30.0115	29.5488	29.4361	29.4865	27.0761	27.2662	27.6612	29.8666	29.6228	29.5683	5	39.8	72.349	5.863	-0.335661	0	83.544
Pg_S0756.7	glutathione S-transferase TAU 8	AT3G09270.1	P81124	AT3G09270.1 | Symbols: ATGSTU8, GSTU8 | glutathione S-transferase TAU 8 | chr3:2848407-2849226 REVERSE LENGTH=224	Probable glutathione transferase (Fragment) OS=Aplysia californica PE=1 SV=1	Cytoplasmic; Chloroplast;	25.9301	26.3995	26.8474	27.9204	27.9535	28.1454	27.7912	28.1334	28.1032	29.3956	29.3402	29.3069	3	39.7	25.142	6.926	-0.208219	0	124.39
Pg_S2307.13	ribosomal protein 5B	AT2G37270.1	Q9Y265	AT2G37270.1 | Symbols: ATRPS5B, RPS5B | ribosomal protein 5B | chr2:15647883-15649042 REVERSE LENGTH=207	RuvB-like 1 OS=Homo sapiens GN=RUVBL1 PE=1 SV=1	Cytoplasmic; Mitochondrial; Nuclear	26.3571	26.7345	27.0644	27.8781	27.8779	28.1604	28.6345	28.6651	28.7395	28.8123	28.7386	28.9055	1	43	23.053	9.658	-0.374879	0	191.58
Pg_S2382.6	eukaryotic translation initiation factor 2 gamma subunit	AT1G04170.1	Q1LSY4	AT1G04170.1 | Symbols: EIF2 GAMMA | eukaryotic translation initiation factor 2 gamma subunit | chr1:1097423-1099702 FORWARD LENGTH=465	Elongation factor Tu OS=Baumannia cicadellinicola subsp. Homalodisca coagulata GN=tuf PE=3 SV=1	Cytoplasmic; Mitochondrial;	25.4693	25.5681	25.5661	25.8045	25.8845	25.8197	26.5151	26.603	26.8967	25.8088	25.7247	25.9046	7	21.1	50.776	8.333	-0.0125	0	28.219
Pg_S0761.10	signal peptide peptidase	AT1G73990.1	Q9C9C0	AT1G73990.1 | Symbols: SPPA, SPPA1 | signal peptide peptidase | chr1:27824465-27828807 FORWARD LENGTH=677	Serine protease SPPA, chloroplastic OS=Arabidopsis thaliana GN=SPPA PE=2 SV=1	Chloroplast;	25.9164	25.5914	25.8227	26.5318	26.4353	26.5151	25.9253	26.3227	26.1551	26.467	26.6403	26.3683	3	19.4	70.906	8.782	-0.302821	0	29.326
Pg_S0765.1	cysteine synthase C1	AT3G61440.1	P55708	AT3G61440.1 | Symbols: ATCYSC1, ARATH;BSAS3;1, CYSC1 | cysteine synthase C1 | chr3:22735885-22737792 FORWARD LENGTH=368	Putative cysteine synthase OS=Rhizobium sp. (strain NGR234) GN=NGR_a00730 PE=3 SV=1	Cytoplasmic; Mitochondrial; Chloroplast	27.872	27.7494	27.6688	27.5042	27.6382	27.6136	27.0482	26.9808	27.0819	27.5149	27.4221	27.5544	8	24.2	40.313	7.887	-0.125806	0	49.45
Pg_S0765.9	-	-	-	-	-	Plasmamembrane;	29.8786	29.7718	29.917	29.3287	29.3476	29.3929	26.5437	26.3605	26.0737	29.651	29.5748	29.4775	15	44.5	57.12	4.581	-0.198646	0	224.96
Pg_S0785.20	photosystem I subunit D-2	AT1G03130.1	P84563	AT1G03130.1 | Symbols: PSAD-2 | photosystem I subunit D-2 | chr1:753528-754142 REVERSE LENGTH=204	Photosystem I reaction center subunit II (Fragment) OS=Populus euphratica GN=psaD PE=1 SV=1	Mitochondrial; Chloroplast;	33.4566	33.093	33.1716	31.5516	31.1777	31.4535	30.732	30.6958	31.233	32.599	32.4429	32.512	1	41.1	22.218	10.071	-0.44802	0	121.19
Pg_S0785.28	Mevalonate/galactokinase family protein	AT3G06580.1	Q9V187	AT3G06580.1 | Symbols: GAL1, GALK | Mevalonate/galactokinase family protein | chr3:2049141-2051867 REVERSE LENGTH=496	Mevalonate kinase OS=Pyrococcus abyssi (strain GE5 / Orsay) GN=mvk PE=3 SV=1	Cytoplasmic; Chloroplast;	29.5689	29.2715	29.5687	29.2219	29.1908	29.1025	28.5414	28.4914	28.6669	29.2137	29.348	29.1267	2	48.5	54.58	5.915	-0.117635	0	312.77
Pg_S0785.35	Tetratricopeptide repeat (TPR)-like superfamily protein	AT5G41950.1	-	AT5G41950.1 | Symbols: | Tetratricopeptide repeat (TPR)-like superfamily protein | chr5:16785825-16789360 FORWARD LENGTH=565	-	Cytoplasmic;	30.6931	30.8069	30.8183	30.3063	30.0619	30.0393	31.3575	31.3661	31.3352	29.7536	28.7561	29.3654	1	14.3	84.697	4.707	-0.345298	0	152.39
Pg_S0785.52	Aluminium induced protein with YGL and LRDR motifs	AT4G27450.1	Q10MX3	AT4G27450.1 | Symbols: | Aluminium induced protein with YGL and LRDR motifs | chr4:13727665-13728683 REVERSE LENGTH=250	Asparagine synthetase [glutamine-hydrolyzing] 1 OS=Oryza sativa subsp. japonica GN=Os03g0291500 PE=2 SV=1	Chloroplast;	26.0135	26.8202	25.9842	27.1608	24.5324	26.0519	27.4337	27.5236	27.5847	24.7282	25.5304	25.085	4	38.6	25.231	4.593	-0.0415254	0	30.348
Pg_S0786.11	Cystathionine beta-synthase (CBS) family protein	AT4G36910.1	Q9UY49	AT4G36910.1 | Symbols: LEJ2, CDCP2 | Cystathionine beta-synthase (CBS) family protein | chr4:17391016-17393218 REVERSE LENGTH=236	Inosine-5'-monophosphate dehydrogenase OS=Pyrococcus abyssi (strain GE5 / Orsay) GN=guaB PE=3 SV=1	Mitochondrial; Chloroplast;	24.8141	25.2923	24.9822	28.3725	28.1734	28.1119	26.523	26.5831	27.1799	28.5217	28.6164	27.8606	6	50.7	22.56	9.817	-0.142927	0	47.819
Pg_S0786.28	regulatory particle triple-A ATPase 3	AT5G58290.1	D3FFN2	AT5G58290.1 | Symbols: RPT3 | regulatory particle triple-A ATPase 3 | chr5:23569155-23571116 FORWARD LENGTH=408	ATP-dependent zinc metalloprotease FtsH OS=Mycoplasma gallisepticum (strain R(high / passage 156)) GN=ftsH PE=3 SV=1	Cytoplasmic; Nuclear;	25.3518	26.0164	25.8339	27.4375	27.3471	27.5649	28.308	28.2292	28.3132	27.3057	27.7227	27.2482	13	66.6	46.807	5.354	-0.388942	0	174.86
Pg_S3280.1	lon protease 1	AT5G26860.1	Q5UPT0	AT5G26860.1 | Symbols: LON_ARA_ARA, LON1 | lon protease 1 | chr5:9451183-9456631 FORWARD LENGTH=940	Lon protease homolog OS=Acanthamoeba polyphaga mimivirus GN=MIMI_L251 PE=3 SV=1	Cytoplasmic; Mitochondrial;	27.0659	27.0728	27.47	27.196	26.858	27.2057	26.4202	25.7671	26.3323	26.8859	27.1557	26.9268	13	20.6	109.03	5.018	-0.292698	0	35.172
Pg_S1163.3	L-Aspartase-like family protein	AT1G36280.1	Q05911	AT1G36280.1 | Symbols: | L-Aspartase-like family protein | chr1:13640600-13642908 FORWARD LENGTH=527	Adenylosuccinate lyase OS=Saccharomyces cerevisiae (strain ATCC 204508 / S288c) GN=ADE13 PE=1 SV=1	Cytoplasmic; Chloroplast; Nuclear	26.7474	26.8311	26.897	26.9639	26.9333	26.3573	25.9007	25.8574	26.6713	26.4727	26.7511	26.3856	9	26.2	58.869	5.637	-0.267736	0	24.657
Pg_S0799.5	Translation elongation factor EF1B, gamma chain	AT1G09640.1	Q9VG96	AT1G09640.1 | Symbols: | Translation elongation factor EF1B, gamma chain | chr1:3120162-3122152 FORWARD LENGTH=414	Glutathione S-transferase D4 OS=Drosophila melanogaster GN=GstD4 PE=1 SV=1	Cytoplasmic;	26.8011	26.489	26.6202	27.6998	27.8514	27.9942	26.9546	26.7634	26.8985	27.9164	28.1184	27.7788	1	40.2	48.043	5.637	-0.369504	0	104.6
Pg_S0804.5	pleiotropic drug resistance 12	AT1G15520.1	P08183	AT1G15520.1 | Symbols: PDR12, ATPDR12, ABCG40, ATABCG40 | pleiotropic drug resistance 12 | chr1:5331993-5338175 REVERSE LENGTH=1423	Multidrug resistance protein 1 OS=Homo sapiens GN=ABCB1 PE=1 SV=3	Plasmamembrane;	27.8493	27.9058	28.0016	28.3255	28.2689	28.3672	27.0622	27.0601	27.5479	28.1759	28.3116	28.2209	14	22.2	162.53	6.225	0.0658604	0	121.85
Pg_S0808.11	Glycosyl transferase, family 35	AT3G29320.1	P29849	AT3G29320.1 | Symbols: | Glycosyl transferase, family 35 | chr3:11252871-11257587 FORWARD LENGTH=962	Maltodextrin phosphorylase OS=Streptococcus pneumoniae serotype 4 (strain ATCC BAA-334 / TIGR4) GN=malP PE=3 SV=2	Cytoplasmic; Chloroplast;	30.5523	30.859	30.7567	30.7408	30.6108	30.8299	30.1978	30.213	30.1343	30.5892	30.6805	30.5049	7	54	108.99	5.022	-0.351667	0	277.45
Pg_S0808.14	UDP-glucose 6-dehydrogenase family protein	AT5G15490.1	P39861	AT5G15490.1 | Symbols: | UDP-glucose 6-dehydrogenase family protein | chr5:5027872-5029314 REVERSE LENGTH=480	Protein CapL OS=Staphylococcus aureus GN=capL PE=3 SV=1	Cytoplasmic;	29.4494	29.2912	29.2706	29.0305	29.0928	29.08	29.839	29.8574	29.8807	28.9068	28.9795	29.1166	1	58.8	52.969	5.648	-0.0470833	0	224.46
Pg_S0810.2	S-adenosylmethionine synthetase 1	AT1G02500.1	B4THH4	AT1G02500.1 | Symbols: SAM1, SAM-1, MAT1, AtSAM1 | S-adenosylmethionine synthetase 1 | chr1:519037-520218 FORWARD LENGTH=393	S-adenosylmethionine synthase OS=Salmonella heidelberg (strain SL476) GN=metK PE=3 SV=1	Cytoplasmic;	29.0611	28.8714	29.0247	28.5583	28.3496	28.5748	31.4723	31.3724	31.24	28.0999	28.1772	28.0369	5	72.4	42.82	5.416	-0.290793	0	323.31
Pg_S0810.65	pyrimidine d	AT5G23300.1	Q5P1A9	AT5G23300.1 | Symbols: PYRD | pyrimidine d | chr5:7847792-7850243 REVERSE LENGTH=460	Dihydroorotate dehydrogenase (quinone) OS=Aromatoleum aromaticum (strain EbN1) GN=pyrD PE=3 SV=1	Mitochondrial; Chloroplast;	27.0884	26.8175	26.928	26.5123	26.887	26.3687	25.4141	25.5928	25.2457	25.9085	26.2054	26.4609	1	31.8	48.978	9.139	-0.193723	0	23.427
Pg_S7216.2	glyceraldehyde 3-phosphate dehydrogenase A subunit	AT3G26650.1	Q5PJI5	AT3G26650.1 | Symbols: GAPA, GAPA-1 | glyceraldehyde 3-phosphate dehydrogenase A subunit | chr3:9795226-9796848 FORWARD LENGTH=396	D-erythrose-4-phosphate dehydrogenase OS=Salmonella paratyphi A (strain ATCC 9150 / SARB42) GN=epd PE=3 SV=1	Chloroplast;	32.1188	31.941	31.7703	30.2554	30.3875	30.3769	30.4751	30.4405	30.2765	30.0885	30.0875	30.2172	9	56	42.36	7.554	0.0427136	0	190.39
Pg_S0812.14	FAD-binding Berberine family protein	AT4G20840.1	P93762	AT4G20840.1 | Symbols: | FAD-binding Berberine family protein | chr4:11157916-11159535 FORWARD LENGTH=539	Hexose oxidase OS=Chondrus crispus GN=HOX PE=1 SV=2	Plasmamembrane;	33.0158	32.9473	33.0046	30.9228	30.8183	30.8355	25.4349	25.3674	25.1493	30.8384	30.825	30.8501	10	34	61.352	8.762	-0.11011	0	148.55
Pg_S0812.17	FAD-binding Berberine family protein	AT4G20840.1	P93762	AT4G20840.1 | Symbols: | FAD-binding Berberine family protein | chr4:11157916-11159535 FORWARD LENGTH=539	Hexose oxidase OS=Chondrus crispus GN=HOX PE=1 SV=2	Plasmamembrane;	28.8849	28.3926	28.6113	26.5948	26.9916	26.9585	30.1796	30.1634	30.3301	26.9033	26.7027	26.9713	2	59.7	60.565	8.529	0.0120148	0	176.72
Pg_S0813.2	glucose-6-phosphate dehydrogenase 6	AT5G40760.1	P15588	AT5G40760.1 | Symbols: G6PD6 | glucose-6-phosphate dehydrogenase 6 | chr5:16311284-16314556 FORWARD LENGTH=515	Glucose-6-phosphate 1-dehydrogenase (Fragments) OS=Didelphis virginiana GN=G6PD PE=3 SV=1	Cytoplasmic; Nuclear;	28.6008	28.4344	28.5021	29.1398	29.2709	29.2833	28.2096	28.2525	28.3226	29.1204	29.0525	28.9129	8	35.7	60.948	7.061	-0.418302	0	133.39
Pg_S0822.13	DPP6 N-terminal domain-like protein	AT1G21680.1	-	AT1G21680.1 | Symbols: | DPP6 N-terminal domain-like protein | chr1:7613028-7615148 FORWARD LENGTH=706	-	Extracellular;	29.5481	29.1884	29.3753	27.0215	27.228	27.7167	25.7499	25.9158	26.1521	26.7505	27.3543	27.3772	13	28.2	79.775	5.868	-0.438248	0	71.864
Pg_S4362.9	glyceraldehyde-3-phosphate dehydrogenase of plastid 2	AT1G16300.1	P80505	AT1G16300.1 | Symbols: GAPCP-2 | glyceraldehyde-3-phosphate dehydrogenase of plastid 2 | chr1:5574433-5577406 FORWARD LENGTH=420	Glyceraldehyde-3-phosphate dehydrogenase 2 OS=Synechocystis sp. (strain PCC 6803 / Kazusa) GN=gap2 PE=1 SV=3	Chloroplast;	26.9437	27.7159	27.1441	27.5584	26.4397	26.1403	26.9357	27.0081	25.3023	26.3622	26.0849	25.6463	8	33.5	45.497	8.27	-0.162264	0	39.779
Pg_S0833.10	PDI-like 1-4	AT5G60640.1	P10472	AT5G60640.1 | Symbols: ATPDIL1-4, PDI2, ATPDI2, PDIL1-4 | PDI-like 1-4 | chr5:24371141-24373993 REVERSE LENGTH=597	Thioredoxin OS=Chlorobaculum thiosulfatiphilum GN=trxA PE=1 SV=5	ER;	31.0712	31.0157	31.0792	29.5432	29.5251	29.4005	28.8438	29.0617	28.8166	29.1188	29.2139	29.2472	3	50.8	64.511	4.411	-0.362218	0	163.26
Pg_S0833.9	4-hydroxy-3-methylbut-2-enyl diphosphate synthase	AT5G60600.1	B7VJT8	AT5G60600.1 | Symbols: GCPE, ISPG, CSB3, CLB4, HDS | 4-hydroxy-3-methylbut-2-enyl diphosphate synthase | chr5:24359447-24363274 FORWARD LENGTH=741	4-hydroxy-3-methylbut-2-en-1-yl diphosphate synthase OS=Vibrio splendidus (strain LGP32) GN=ispG PE=3 SV=1	Cytoplasmic;	26.6355	26.3322	26.1185	26.5663	26.6221	27.1932	26.5747	26.6672	26.7056	26.7929	26.6866	26.3511	7	39.1	82.038	6.094	-0.265135	0	23.009
Pg_S0838.6	Transketolase family protein	AT5G50850.1	B1YLQ5	AT5G50850.1 | Symbols: MAB1 | Transketolase family protein | chr5:20689671-20692976 FORWARD LENGTH=363	1-deoxy-D-xylulose-5-phosphate synthase OS=Exiguobacterium sibiricum (strain DSM 17290 / JCM 13490 / 255-15) GN=dxs PE=3 SV=1	Mitochondrial; Chloroplast;	25.9084	26.0199	25.6334	26.3502	26.1362	26.5327	25.7986	25.5156	25.9617	26.0636	25.9506	25.8925	2	27.4	39.983	5.307	0.0626344	0	25.31
Pg_S0840.7	Glycosyl hydrolase family protein	AT5G20950.1	P83344	AT5G20950.1 | Symbols: | Glycosyl hydrolase family protein | chr5:7107609-7110775 REVERSE LENGTH=624	Putative beta-D-xylosidase (Fragment) OS=Prunus persica PE=2 SV=1	Extracellular;	27.0699	27.1584	27.0171	25.4862	24.6063	25.2797	26.8953	26.9543	27.0981	25.7134	25.5619	25.607	1	19.4	80.893	7.943	-0.147099	0	66.625
Pg_S1355.7	alpha/beta-Hydrolases superfamily protein	AT4G16820.1	Q9P979	AT4G16820.1 | Symbols: PLA-I{beta]2 | alpha/beta-Hydrolases superfamily protein | chr4:9467563-9469116 FORWARD LENGTH=517	Feruloyl esterase A OS=Aspergillus awamori GN=faeA PE=1 SV=3	Cytoplasmic;	26.6974	26.5715	26.5517	28.3031	28.2955	28.3559	27.1409	27.2155	27.0146	28.4306	28.4803	27.9465	6	35.4	26.251	4.91	-0.10535	0	58.598
Pg_S0843.13	aspartic proteinase A1	AT1G11910.1	Q5A651	AT1G11910.1 | Symbols: APA1, ATAPA1 | aspartic proteinase A1 | chr1:4017119-4019874 REVERSE LENGTH=506	Candidapepsin-10 OS=Candida albicans (strain SC5314 / ATCC MYA-2876) GN=SAP10 PE=1 SV=1	Extracellular; Vacuole;	26.9936	27.3588	27.5431	24.3183	24.9487	24.7636	24.8545	24.7557	24.8517	25.1884	24.6645	25.1709	5	15.9	58.819	5.915	-0.0222222	0	34.467
Pg_S0851.2	serine carboxypeptidase-like 42	AT5G42240.1	C5FW30	AT5G42240.1 | Symbols: scpl42 | serine carboxypeptidase-like 42 | chr5:16888717-16890931 FORWARD LENGTH=473	Carboxypeptidase S1 homolog A OS=Arthroderma otae (strain ATCC MYA-4605 / CBS 113480) GN=SCPA PE=3 SV=1	Lysosomal;	29.574	29.0705	29.4262	26.922	27.4041	26.5199	26.4398	26.5602	26.7196	26.6246	26.8191	26.9035	1	25.8	53.182	5.917	-0.188136	0	97.107
Pg_S0853.7	PDI-like 2-2	AT1G04980.1	P75512	AT1G04980.1 | Symbols: ATPDIL2-2, ATPDI10, PDI10, PDIL2-2 | PDI-like 2-2 | chr1:1413869-1416120 REVERSE LENGTH=447	Thioredoxin OS=Mycoplasma pneumoniae (strain ATCC 29342 / M129) GN=trxA PE=3 SV=1	ER; Chloroplast;	28.875	29.0563	28.9775	28.5243	28.6114	28.7763	27.8009	27.8331	27.9457	29.1111	29.112	29.0409	2	41.6	46.595	5.365	-0.18972	0	98.688
Pg_S0857.26	glycine decarboxylase complex H	unknown	unknown	unknown	unknown	Mitochondrial;	30.4819	30.5772	30.428	28.8394	28.8489	28.9808	31.6573	31.6009	31.7841	29.4688	29.202	29.0188	1	35.5	17.887	4.983	-0.213253	0	93.254
Pg_S1764.1	Chlorophyll A-B binding family protein	AT1G76570.1	P08222	AT1G76570.1 | Symbols: | Chlorophyll A-B binding family protein | chr1:28729132-28730754 FORWARD LENGTH=327	Chlorophyll a-b binding protein of LHCII type 1 (Fragment) OS=Cucumis sativus PE=2 SV=1	Plasmamembrane; Chloroplast;	29.8395	30.0093	30.0751	31.5606	31.5779	31.7176	31.4027	31.4799	31.3185	32.2399	32.2969	32.1837	3	36	28.557	7.351	0.297426	0	130
Pg_S0867.2	phospholipase D alpha 2	AT1G52570.1	Q54Z25	AT1G52570.1 | Symbols: PLDALPHA2 | phospholipase D alpha 2 | chr1:19583940-19586551 REVERSE LENGTH=810	Phospholipase D C OS=Dictyostelium discoideum GN=pldC PE=3 SV=1	Cytoplasmic;	30.5162	30.5165	30.5443	30.7279	30.6647	30.7307	31.1941	31.1549	31.0615	30.6824	30.5131	30.7735	3	60.7	92.024	5.379	-0.427318	0	323.31
Pg_S0871.3	phosphoglycerate kinase	AT1G79550.1	O83549	AT1G79550.1 | Symbols: PGK | phosphoglycerate kinase | chr1:29924347-29926295 REVERSE LENGTH=401	Phosphoglycerate kinase OS=Treponema pallidum (strain Nichols) GN=pgk PE=3 SV=1	Cytoplasmic;	28.4829	28.3662	28.5195	31.4521	31.5028	31.3105	31.16	31.243	30.9179	31.2009	31.1761	31.1663	1	68.3	42.288	6.077	0.121446	0	255.25
Pg_S5153.11	regulatory particle triple-A 1A	AT1G53750.1	P54812	AT1G53750.1 | Symbols: RPT1A | regulatory particle triple-A 1A | chr1:20065921-20068324 REVERSE LENGTH=426	Transitional endoplasmic reticulum ATPase homolog 2 OS=Caenorhabditis elegans GN=cdc-48.2 PE=1 SV=2	Cytoplasmic;	27.5902	27.8045	27.8443	27.9233	28.1162	28.2978	28.255	28.0721	27.9727	28.1042	28.0397	28.1374	9	52.5	47.822	5.901	-0.406557	0	110.11
Pg_S0878.4	pectin methylesterase 3	AT3G14310.1	P17407	AT3G14310.1 | Symbols: ATPME3, PME3 | pectin methylesterase 3 | chr3:4772214-4775095 REVERSE LENGTH=592	21 kDa protein OS=Daucus carota PE=2 SV=1	Mitochondrial;	28.9573	29.0325	29.0755	27.4034	27.4371	27.7419	27.2539	27.2374	26.8508	27.9486	28.1047	28.1694	4	31.1	59.26	8.574	-0.228309	0	53.049
Pg_S0885.4	GDSL-like Lipase/Acylhydrolase superfamily protein	AT1G29660.1	P10978	AT1G29660.1 | Symbols: | GDSL-like Lipase/Acylhydrolase superfamily protein | chr1:10371955-10373624 FORWARD LENGTH=364	Retrovirus-related Pol polyprotein from transposon TNT 1-94 OS=Nicotiana tabacum PE=2 SV=1	Cytoplasmic;	31.4428	30.8342	30.9952	28.7775	28.7732	28.7769	29.0111	28.912	28.5899	28.7145	28.605	28.7578	1	19.9	53.654	7.716	-0.354393	0	58.617
Pg_S0889.28	UDP-D-glucose/UDP-D-galactose 4-epimerase 5	AT4G10960.1	P35673	AT4G10960.1 | Symbols: UGE5 | UDP-D-glucose/UDP-D-galactose 4-epimerase 5 | chr4:6716083-6718472 REVERSE LENGTH=351	UDP-glucose 4-epimerase OS=Erwinia amylovora GN=galE PE=3 SV=1	Cytoplasmic;	25.784	26.1958	25.6911	27.1311	27.0794	27.2182	25.9823	26.063	26.2289	26.7053	26.7429	26.2188	9	39.5	38.255	7.069	-0.16361	0	28.908
Pg_S0889.34	AMP-dependent synthetase and ligase family protein	AT3G48990.1	Q8EDK3	AT3G48990.1 | Symbols: | AMP-dependent synthetase and ligase family protein | chr3:18159031-18161294 REVERSE LENGTH=514	Acetyl-coenzyme A synthetase OS=Shewanella oneidensis (strain MR-1) GN=acsA PE=3 SV=1	Cytoplasmic;	26.8409	26.7543	26.8927	27.5012	27.5268	27.3397	27.6574	27.4464	27.5583	27.2299	27.1056	26.9952	14	26.7	75.086	6.145	-0.135171	0	49.163
Pg_S0889.74	Nucleoside diphosphate kinase family protein	AT4G09320.1	Q8RBR5	AT4G09320.1 | Symbols: NDPK1 | Nucleoside diphosphate kinase family protein | chr4:5923424-5924366 FORWARD LENGTH=169	Nucleoside diphosphate kinase OS=Thermoanaerobacter tengcongensis (strain DSM 15242 / JCM 11007 / NBRC 100824 / MB4) GN=ndk PE=3 SV=1	Mitochondrial; Chloroplast;	27.193	27.7059	27.487	28.4146	28.1392	28.2873	28.4451	28.5091	28.3708	28.4114	28.3033	28.2988	5	42.7	23.765	8.831	-0.256881	0	100.75
Pg_S0895.10	ubiquitin-specific protease 6	AT1G51710.1	Q9P275	AT1G51710.1 | Symbols: UBP6, ATUBP6 | ubiquitin-specific protease 6 | chr1:19175805-19179894 REVERSE LENGTH=482	Ubiquitin carboxyl-terminal hydrolase 36 OS=Homo sapiens GN=USP36 PE=1 SV=3	Cytoplasmic; Nuclear;	27.3431	27.3233	26.9215	26.6417	26.6853	26.7075	27.3806	27.3053	27.3988	26.0304	26.52	26.0166	5	26.8	57.868	6.162	-0.415637	0	29.613
Pg_S0895.37	glyoxylate reductase 2	AT1G17650.1	P9WNY2	AT1G17650.1 | Symbols: GLYR2, GR2 | glyoxylate reductase 2 | chr1:6069594-6071964 REVERSE LENGTH=358	Uncharacterized oxidoreductase MT0794 OS=Mycobacterium tuberculosis (strain CDC 1551 / Oshkosh) GN=MT0794 PE=3 SV=1	Chloroplast;	27.511	27.7809	27.6557	26.8686	26.8856	26.7212	26.9425	26.697	26.8693	26.6499	26.7919	26.6403	2	29	65.93	5.44	-0.0387821	0	52.488
Pg_S6468.14	ribosomal protein large subunit 27	AT5G40950.1	A4F9L2	AT5G40950.1 | Symbols: RPL27 | ribosomal protein large subunit 27 | chr5:16410866-16411845 FORWARD LENGTH=198	50S ribosomal protein L27 OS=Saccharopolyspora erythraea (strain NRRL 23338) GN=rpmA PE=3 SV=1	Mitochondrial; Chloroplast; Nuclear	25.6134	25.6945	25.8021	23.7319	23.8339	23.5271	26.699	26.8016	26.9473	26.7058	27.1315	27.2148	3	17.8	20.68	10.717	-0.430366	0	58.518
Pg_S0896.39	beta glucosidase 16	AT3G60130.1	Q59437	AT3G60130.1 | Symbols: BGLU16 | beta glucosidase 16 | chr3:22210343-22213650 FORWARD LENGTH=514	Beta-glucosidase A OS=Enterobacter agglomerans GN=bglA PE=3 SV=1	Vacuole;	29.2678	29.1366	29.3737	28.008	28.113	28.0493	26.9172	26.8722	26.8418	28.3522	27.9306	28.0744	3	39.3	54.754	5.36	-0.430247	0	42.166
Pg_S0896.40	beta glucosidase 13	AT5G44640.1	O52629	AT5G44640.1 | Symbols: BGLU13 | beta glucosidase 13 | chr5:18011146-18012669 FORWARD LENGTH=507	Beta-galactosidase OS=Pyrococcus woesei PE=1 SV=1	Cytoplasmic;	29.6816	29.7655	29.5759	28.5946	28.6252	28.5991	32.3283	32.324	32.2383	28.7655	28.7303	28.669	15	58.4	61.045	6.053	-0.412523	0	323.31
Pg_S0898.14	PsbP-like protein 1	AT3G55330.1	P93566	AT3G55330.1 | Symbols: PPL1 | PsbP-like protein 1 | chr3:20514031-20515275 REVERSE LENGTH=230	Oxygen-evolving enhancer protein 2, chloroplastic OS=Solanum tuberosum GN=PSBP PE=2 SV=1	Mitochondrial; Chloroplast;	28.7073	28.457	28.3098	29.59	29.3618	29.5945	27.8402	27.9256	29.3203	30.0871	29.5533	30.1276	1	33.1	32.527	7.174	-0.31069	0	84.081
Pg_S0898.6	Sec14p-like phosphatidylinositol transfer family protein	AT1G72160.1	Q8NHP6	AT1G72160.1 | Symbols: | Sec14p-like phosphatidylinositol transfer family protein | chr1:27153823-27155609 REVERSE LENGTH=490	Motile sperm domain-containing protein 2 OS=Homo sapiens GN=MOSPD2 PE=1 SV=1	Cytoplasmic; Nuclear;	30.5778	29.1737	30.4099	28.689	28.2134	28.3189	25.6955	25.4987	25.2474	29.6129	29.469	29.5174	12	47.2	66.307	4.387	-0.506478	0	139.27
Pg_S0901.9	methionine--tRNA ligase, putative / methionyl-tRNA synthetase, putative / MetRS, putative	AT4G13780.1	B0KUD8	AT4G13780.1 | Symbols: | methionine--tRNA ligase, putative / methionyl-tRNA synthetase, putative / MetRS, putative | chr4:7993366-7998433 REVERSE LENGTH=797	Methionine--tRNA ligase OS=Pseudomonas putida (strain GB-1) GN=metG PE=3 SV=1	Cytoplasmic;	29.0854	29.0429	29.1052	28.2903	28.2222	28.2525	26.382	26.4018	26.316	28.1113	28.2779	28.054	3	30.1	91.614	6.022	-0.402826	0	78.129
Pg_S0902.20	Ribosomal protein L16p/L10e family protein	AT1G26910.1	Q8SR96	AT1G26910.1 | Symbols: RPL10B | Ribosomal protein L16p/L10e family protein | chr1:9321709-9322813 FORWARD LENGTH=221	60S ribosomal protein L10 OS=Encephalitozoon cuniculi (strain GB-M1) GN=RPL10 PE=1 SV=1	Cytoplasmic; Mitochondrial;	27.5379	26.0047	26.3593	26.879	26.7924	26.851	28.7163	28.6333	28.6719	26.5269	26.9967	26.946	5	23.5	25.074	10.696	-0.493213	0	38.559
Pg_S0905.11	PAM domain (PCI/PINT associated module) protein	AT1G20200.1	Q8SYG2	AT1G20200.1 | Symbols: EMB2719, HAP15 | PAM domain (PCI/PINT associated module) protein | chr1:7001409-7004154 REVERSE LENGTH=488	COP9 signalosome complex subunit 3 OS=Drosophila melanogaster GN=CSN3 PE=2 SV=2	Nuclear;	26.848	26.9717	26.8561	28.2226	28.1423	28.5323	28.1806	28.0919	28.2626	28.6326	28.6211	28.644	2	21.3	121.19	6.7	-0.823684	0	229.48
Pg_S0905.44	NAD(P)-binding Rossmann-fold superfamily protein	AT1G30620.1	Q31FG4	AT1G30620.1 | Symbols: HSR8, MUR4, UXE1 | NAD(P)-binding Rossmann-fold superfamily protein | chr1:10855496-10857970 FORWARD LENGTH=419	ADP-L-glycero-D-manno-heptose-6-epimerase OS=Thiomicrospira crunogena (strain XCL-2) GN=hldD PE=3 SV=1	Mitochondrial; Chloroplast;	26.581	26.8863	26.864	28.7916	28.7443	28.8203	28.618	28.8106	28.6377	29.2532	29.1308	29.175	16	57	43.842	7.717	-0.0354271	0	123.5
Pg_S0905.60	ubiquitin family protein	AT2G17200.1	Q9Z1R2	AT2G17200.1 | Symbols: DSK2 | ubiquitin family protein | chr2:7482133-7485090 REVERSE LENGTH=551	Large proline-rich protein BAG6 OS=Mus musculus GN=Bag6 PE=1 SV=1	Nuclear;	30.1142	30.0172	30.1455	27.8622	27.9548	27.9164	28.3417	28.4191	28.1127	28.0425	28.0423	28.1641	4	23.3	57.649	4.621	-0.467695	0	86.014
Pg_S0908.18	glutathione S-transferase TAU 8	AT3G09270.1	P81124	AT3G09270.1 | Symbols: ATGSTU8, GSTU8 | glutathione S-transferase TAU 8 | chr3:2848407-2849226 REVERSE LENGTH=224	Probable glutathione transferase (Fragment) OS=Aplysia californica PE=1 SV=1	Cytoplasmic;	26.2981	26.6013	26.5648	27.5965	27.5946	27.3561	26.2183	25.753	26.3507	26.9217	27.5722	27.4152	4	16.4	50.328	6.636	-0.254545	0	57.051
Pg_S0917.21	Endomembrane protein 70 protein family	AT2G01970.1	P40071	AT2G01970.1 | Symbols: | Endomembrane protein 70 protein family | chr2:452197-454819 REVERSE LENGTH=592	Transmembrane 9 superfamily member 3 OS=Saccharomyces cerevisiae (strain ATCC 204508 / S288c) GN=TMN3 PE=1 SV=1	Plasmamembrane;	27.9311	27.8592	27.986	27.5614	27.754	27.8096	27.3161	27.3561	27.3387	27.9523	27.8972	27.7805	3	19.1	118.87	7.708	-0.0383523	0	70.944
Pg_S0920.4	TCP-1/cpn60 chaperonin family protein	AT3G18190.1	Q6NF74	AT3G18190.1 | Symbols: | TCP-1/cpn60 chaperonin family protein | chr3:6232226-6233836 FORWARD LENGTH=536	60 kDa chaperonin 2 OS=Corynebacterium diphtheriae (strain ATCC 700971 / NCTC 13129 / Biotype gravis) GN=groL2 PE=3 SV=1	Cytoplasmic;	24.8209	25.4566	25.7646	28.2226	28.2168	28.2761	29.1878	29.122	29.1773	28.4094	28.3869	28.3451	1	59.6	57.369	6.731	0.146241	0	174.24
Pg_S0922.18	serine carboxypeptidase-like 20	AT4G12910.1	B6V867	AT4G12910.1 | Symbols: scpl20 | serine carboxypeptidase-like 20 | chr4:7550576-7553051 REVERSE LENGTH=497	Carboxypeptidase S1 homolog A OS=Trichophyton tonsurans GN=SCPA PE=3 SV=1	Lysosomal; Vacuole;	29.3153	29.4825	29.2253	27.8157	27.745	28.1099	27.3581	27.3117	27.6264	27.9609	27.9268	27.7841	7	20.4	55.004	5.117	-0.220808	0	36.948
Pg_S1865.29	translocon-associated protein beta (TRAPB) family protein	AT5G14030.1	-	AT5G14030.1 | Symbols: | translocon-associated protein beta (TRAPB) family protein | chr5:4526878-4528253 FORWARD LENGTH=195	-	Unknown	26.4902	26.6736	26.3479	26.7409	27.3217	26.997	26.7708	26.314	26.1136	27.0613	27.2646	27.0876	5	24.9	23.306	5.313	-0.0732057	0	15.542
Pg_S0930.40	Ubiquinol-cytochrome C reductase iron-sulfur subunit	AT5G13440.1	Q7NCE1	AT5G13440.1 | Symbols: | Ubiquinol-cytochrome C reductase iron-sulfur subunit | chr5:4308431-4310022 REVERSE LENGTH=274	Cytochrome b6-f complex iron-sulfur subunit OS=Gloeobacter violaceus (strain PCC 7421) GN=petC PE=3 SV=1	Chloroplast;	27.2059	27.1178	27.2225	26.7704	26.9994	26.8757	26.699	26.8751	26.7636	26.7334	26.6234	26.7314	1	22.7	30.404	8.339	-0.153237	0	54.48
Pg_S0930.5	acetyl-CoA synthetase	AT5G36880.2	A7IFD4	AT5G36880.2 | Symbols: ACS | acetyl-CoA synthetase | chr5:14534961-14540296 REVERSE LENGTH=743	Acetyl-coenzyme A synthetase OS=Xanthobacter autotrophicus (strain ATCC BAA-1158 / Py2) GN=acsA PE=3 SV=1	Plasmamembrane;	29.8476	29.9246	29.6655	28.359	28.4759	28.4844	25.0408	25.311	25.0394	28.0713	28.2597	28.0693	6	29.1	88.186	6.467	-0.253046	0	94.863
Pg_S0938.17	Photosystem II reaction center PsbP family protein	AT2G28605.1	Q8VY52	AT2G28605.1 | Symbols: | Photosystem II reaction center PsbP family protein | chr2:12254911-12255689 FORWARD LENGTH=232	PsbP domain-containing protein 2, chloroplastic OS=Arabidopsis thaliana GN=PPD2 PE=1 SV=1	Chloroplast;	29.1237	29.2247	29.2691	27.978	27.7599	27.8589	28.4348	28.3516	28.3973	27.9092	27.9261	27.8775	7	43.9	28.107	6.133	-0.326482	0	148.18
Pg_S0939.5	triosephosphate isomerase	AT2G21170.1	P48491	AT2G21170.1 | Symbols: TIM, PDTPI | triosephosphate isomerase | chr2:9071047-9073106 REVERSE LENGTH=315	Triosephosphate isomerase, cytosolic OS=Arabidopsis thaliana GN=CTIMC PE=1 SV=2	Cytoplasmic; Chloroplast;	28.876	28.8552	28.628	29.4398	29.8629	29.8805	29.6894	29.6481	29.6413	29.5408	29.7556	29.3936	3	66.9	34.504	5.473	-0.14	0	118.24
Pg_S0940.1	Stabilizer of iron transporter SufD / Polynucleotidyl transferase	AT5G43810.1	Q8TC59	AT5G43810.1 | Symbols: ZLL, PNH, AGO10 | Stabilizer of iron transporter SufD / Polynucleotidyl transferase | chr5:17611939-17616562 FORWARD LENGTH=988	Piwi-like protein 2 OS=Homo sapiens GN=PIWIL2 PE=1 SV=1	Nuclear;	29.7966	29.783	29.6441	28.0717	27.9642	27.947	28.626	28.63	28.5323	28.0049	27.9981	28.131	8	25.3	133.32	9.314	-0.57075	0	164.52
Pg_S0953.16	ferredoxin/thioredoxin reductase subunit A (variable subunit) 2	AT5G08410.1	P24018	AT5G08410.1 | Symbols: FTRA2 | ferredoxin/thioredoxin reductase subunit A (variable subunit) 2 | chr5:2709974-2710528 REVERSE LENGTH=184	Ferredoxin-thioredoxin reductase, variable chain OS=Synechococcus sp. (strain ATCC 27144 / PCC 6301 / SAUG 1402/1) GN=ftrV PE=1 SV=1	Chloroplast; Nuclear;	29.3523	29.4015	29.2764	27.727	27.6177	27.6792	28.4392	28.4434	28.4385	28.4913	28.6102	28.5907	4	54.8	18.511	7.717	-0.406548	0	67.541
Pg_S0953.18	alpha/beta-Hydrolases superfamily protein	AT4G16820.1	Q9P979	AT4G16820.1 | Symbols: PLA-I{beta]2 | alpha/beta-Hydrolases superfamily protein | chr4:9467563-9469116 FORWARD LENGTH=517	Feruloyl esterase A OS=Aspergillus awamori GN=faeA PE=1 SV=3	Cytoplasmic;	25.9724	25.8057	26.0289	28.3136	28.2094	28.315	25.5536	26.0258	25.1339	28.0281	28.4345	28.5561	11	29.6	58.818	4.959	-0.135373	0	42.369
Pg_S0953.6	rubisco activase	AT2G39730.1	O28972	AT2G39730.1 | Symbols: RCA | rubisco activase | chr2:16570951-16573345 REVERSE LENGTH=474	Cell division cycle protein 48 homolog AF_1297 OS=Archaeoglobus fulgidus (strain ATCC 49558 / VC-16 / DSM 4304 / JCM 9628 / NBRC 100126) GN=AF_1297 PE=3 SV=1	Chloroplast;	31.6562	31.3113	31.5846	31.872	31.8406	31.7682	32.1727	32.246	32.2408	31.6353	31.5962	31.6261	2	46.2	61.578	6.91	-0.270383	0	294.29
Pg_S0956.18	Leucine-rich repeat (LRR) family protein	AT1G33590.1	Q3V1N1	AT1G33590.1 | Symbols: | Leucine-rich repeat (LRR) family protein | chr1:12177788-12179221 FORWARD LENGTH=477	Malignant fibrous histiocytoma-amplified sequence 1 homolog OS=Mus musculus GN=Mfhas1 PE=2 SV=2	Extracellular; Plasmamembrane;	27.7298	27.8707	27.7744	25.5107	25.6871	25.5842	27.6931	27.7202	27.6236	26.3582	25.7971	26.06	10	39.4	39.351	8.284	0.142149	0	61.896
Pg_S0959.9	Plant stearoyl-acyl-carrier-protein desaturase family protein	AT2G43710.2	P9WNZ6	AT2G43710.2 | Symbols: SSI2, FAB2 | Plant stearoyl-acyl-carrier-protein desaturase family protein | chr2:18120107-18122495 FORWARD LENGTH=401	Putative acyl-[acyl-carrier-protein] desaturase desA1 OS=Mycobacterium tuberculosis (strain CDC 1551 / Oshkosh) GN=desA1 PE=3 SV=1	Cytoplasmic; Chloroplast;	23.8552	25.0571	24.8455	24.1	24.2389	24.3617	25.8948	25.5046	24.8146	24.6533	24.929	24.8835	5	22.7	45.085	6.246	-0.418434	0	20.886
Pg_S0960.27	Pyruvate kinase family protein	AT5G56350.1	P19680	AT5G56350.1 | Symbols: | Pyruvate kinase family protein | chr5:22820254-22822529 REVERSE LENGTH=498	Pyruvate kinase (Fragment) OS=Spiroplasma citri GN=pyk PE=3 SV=1	Cytoplasmic;	25.8796	25.7225	25.9568	27.1464	26.9159	27.037	26.1252	26.3937	26.3042	26.5448	26.3105	26.3764	1	53.1	53.571	6.653	-0.0193939	0	13.114
Pg_S3386.29	H(+)-ATPase 11	AT5G62670.1	Q9SH76	AT5G62670.1 | Symbols: AHA11, HA11 | H(+)-ATPase 11 | chr5:25159495-25164957 FORWARD LENGTH=956	ATPase 6, plasma membrane-type OS=Arabidopsis thaliana GN=AHA6 PE=2 SV=1	Plasmamembrane;	27.1764	27.2179	26.9098	28.7845	28.6303	28.607	29.2806	29.2288	29.1234	28.5013	28.6341	28.4731	16	39.9	105.22	6.28	0.0895397	0	158.4
Pg_S0961.41	plastid transcriptionally active 16	AT3G46780.1	Q8H0U5	AT3G46780.1 | Symbols: PTAC16 | plastid transcriptionally active 16 | chr3:17228766-17231021 FORWARD LENGTH=510	Protein TIC 62, chloroplastic OS=Arabidopsis thaliana GN=TIC62 PE=1 SV=1	Mitochondrial; Chloroplast;	27.9431	27.7014	27.5472	29.3172	29.4982	29.3956	28.5901	28.4661	28.4293	29.4234	29.4191	29.4072	9	40.9	54.231	8.493	-0.223772	0	190.55
Pg_S0961.57	rubisco activase	AT2G39730.1	O28972	AT2G39730.1 | Symbols: RCA | rubisco activase | chr2:16570951-16573345 REVERSE LENGTH=474	Cell division cycle protein 48 homolog AF_1297 OS=Archaeoglobus fulgidus (strain ATCC 49558 / VC-16 / DSM 4304 / JCM 9628 / NBRC 100126) GN=AF_1297 PE=3 SV=1	Chloroplast;	32.7017	32.9989	32.8244	31.9282	32.0451	32.412	32.4655	32.4359	32.4598	31.627	31.7946	31.7574	6	70.6	51.633	5.836	-0.35572	0	174.4
Pg_S0967.48	nitrogen fixation S (NIFS)-like 1	AT5G65720.1	C6DBJ1	AT5G65720.1 | Symbols: ATNIFS1, NIFS1, NFS1, ATNFS1 | nitrogen fixation S (NIFS)-like 1 | chr5:26296349-26297710 FORWARD LENGTH=453	Cysteine desulfurase IscS OS=Pectobacterium carotovorum subsp. carotovorum (strain PC1) GN=iscS PE=3 SV=1	Mitochondrial; Chloroplast;	27.731	27.3894	27.8637	26.9766	26.7661	26.7442	26.8295	27.1526	26.8032	26.5603	26.9835	26.489	10	31.5	49.547	7.929	-0.188692	0	36.292
Pg_S0969.2	actin 7	AT5G09810.1	P27131	AT5G09810.1 | Symbols: ACT7 | actin 7 | chr5:3052809-3054220 FORWARD LENGTH=377	Actin-1 OS=Naegleria fowleri PE=2 SV=2	Cytoplasmic;	33.8772	33.867	33.8956	33.1962	33.0225	33.0151	33.1511	33.0846	33.1002	32.9744	32.9305	32.9117	2	66	41.711	5.146	-0.170292	0	323.31
Pg_S0978.10	Alanyl-tRNA synthetase	AT1G50200.1	A2BZG2	AT1G50200.1 | Symbols: ALATS, ACD | Alanyl-tRNA synthetase | chr1:18591429-18598311 REVERSE LENGTH=1003	Alanine--tRNA ligase OS=Prochlorococcus marinus (strain NATL1A) GN=alaS PE=3 SV=1	Cytoplasmic;	30.2456	30.4056	30.3921	29.2128	29.386	29.2312	28.7572	28.7248	28.9535	29.0897	29.2219	29.0718	15	37.2	109.23	5.568	-0.298379	0	205.14
Pg_S0978.34	exportin 1A	AT5G17020.1	Q54EV7	AT5G17020.1 | Symbols: XPO1A, ATCRM1, ATXPO1, XPO1, HIT2 | exportin 1A | chr5:5594904-5602467 FORWARD LENGTH=1075	Exportin-1 OS=Dictyostelium discoideum GN=xpo1 PE=3 SV=2	Plasmamembrane;	24.1784	24.3919	25.3246	27.11	26.5973	26.628	26.3219	26.4051	26.5095	26.6264	26.8704	26.91	6	16.7	123.76	5.278	-0.0664186	0	77.31
Pg_S0978.44	rubredoxin family protein	AT5G17170.1	-	AT5G17170.1 | Symbols: ENH1 | rubredoxin family protein | chr5:5649335-5650975 FORWARD LENGTH=271	-	Chloroplast;	31.5332	31.3656	30.781	29.5926	29.7004	29.9076	25.7993	27.6232	27.5359	31.1909	30.1623	30.741	2	38.8	29.132	10.006	-0.140288	0	47.199
Pg_S0981.25	proteasome alpha subunit D2	AT5G66140.1	Q9VA12	AT5G66140.1 | Symbols: PAD2 | proteasome alpha subunit D2 | chr5:26437445-26438677 REVERSE LENGTH=250	Proteasome subunit alpha type-4-like OS=Drosophila melanogaster GN=Prosalpha3T PE=2 SV=1	Mitochondrial;	26.0458	26.5634	26.7757	29.0166	29.0579	29.122	27.4491	27.7471	27.7137	28.6831	28.6123	28.572	9	50.7	32.745	8.789	-0.35473	0	62.36
Pg_S0988.21	heat shock protein 91	AT1G79930.1	Q1LST3	AT1G79930.1 | Symbols: HSP91 | heat shock protein 91 | chr1:30063781-30067067 REVERSE LENGTH=831	Chaperone protein DnaK OS=Baumannia cicadellinicola subsp. Homalodisca coagulata GN=dnaK PE=3 SV=1	Cytoplasmic;	29.5383	29.5992	29.6226	28.3189	28.2229	28.3611	28.899	28.8579	28.7268	28.1532	28.172	27.9434	6	39.1	93.502	4.947	-0.384298	0	136.7
Pg_S6053.13	photosystem I subunit H2	AT1G52230.1	P13352	AT1G52230.1 | Symbols: PSAH2, PSAH-2, PSI-H | photosystem I subunit H2 | chr1:19454902-19455508 FORWARD LENGTH=145	Photosystem I reaction center subunit VI, chloroplastic OS=Chlamydomonas reinhardtii GN=PSAH PE=1 SV=1	Extracellular; Mitochondrial;	28.4269	28.1437	28.0819	27.8125	27.9301	27.7427	28.6685	28.8617	28.6369	27.3848	27.0647	27.4919	2	49	15.392	10.156	-0.12069	0	61.025
Pg_S6053.14	ribosomal protein S17	AT1G79850.1	Q8UE27	AT1G79850.1 | Symbols: RPS17, CS17, PRPS17 | ribosomal protein S17 | chr1:30041473-30041922 REVERSE LENGTH=149	30S ribosomal protein S17 OS=Agrobacterium tumefaciens (strain C58 / ATCC 33970) GN=rpsQ PE=3 SV=1	Mitochondrial; Nuclear;	25.7576	25.7874	25.8577	25.3152	25.148	25.3005	26.7167	26.7766	26.357	25.2141	26.0476	25.2664	1	35	11.318	10.74	-0.77	0	10.815
Pg_S0992.13	fructose-bisphosphate aldolase 2	AT4G38970.1	P91759	AT4G38970.1 | Symbols: FBA2 | fructose-bisphosphate aldolase 2 | chr4:18163714-18165659 REVERSE LENGTH=398	Fructose-bisphosphate aldolase (Fragment) OS=Lymnaea stagnalis PE=2 SV=1	Chloroplast;	32.704	32.8227	32.9811	33.6011	33.2299	33.6495	33.7713	33.8009	33.8228	33.6179	33.1429	33.5429	11	69.3	42.95	7.321	-0.157683	0	323.31
Pg_S0992.19	NAD(P)-linked oxidoreductase superfamily protein	AT1G59960.1	P78736	AT1G59960.1 | Symbols: | NAD(P)-linked oxidoreductase superfamily protein | chr1:22071410-22073067 REVERSE LENGTH=326	NAD(P)H-dependent D-xylose reductase OS=Pachysolen tannophilus GN=XYL1 PE=1 SV=1	Cytoplasmic;	25.6277	25.6029	25.7468	27.7314	27.9903	27.7134	27.5363	27.3094	27.3738	27.531	27.5816	27.672	11	36.6	34.918	5.827	-0.184142	0	39.024
Pg_S0992.53	Translation initiation factor 2, small GTP-binding protein	AT1G17220.1	Q0I7K2	AT1G17220.1 | Symbols: FUG1 | Translation initiation factor 2, small GTP-binding protein | chr1:5885383-5890165 FORWARD LENGTH=1026	Translation initiation factor IF-2 OS=Synechococcus sp. (strain CC9311) GN=infB PE=3 SV=1	Cytoplasmic; Chloroplast;	25.1064	25.1771	25.2995	24.7083	24.7713	24.5224	25.6406	25.7096	25.7351	25.0829	25.2172	25.213	3	7.7	109.63	6.767	-0.289053	0	10.331
Pg_S1014.15	ubiquitin-activating enzyme 1	AT2G30110.1	P51335	AT2G30110.1 | Symbols: ATUBA1, MOS5, UBA1 | ubiquitin-activating enzyme 1 | chr2:12852632-12857369 REVERSE LENGTH=1080	Probable molybdopterin-synthase adenylyltransferase OS=Porphyra purpurea GN=moeB PE=3 SV=1	Cytoplasmic;	29.9799	29.8697	30.0296	29.4227	29.2024	29.2617	27.8687	27.6822	27.8069	28.8794	28.7279	28.7041	4	31.7	122.28	4.974	-0.22686	0	71.671
Pg_S1014.24	Glycosyl hydrolase family protein	AT5G20950.1	P83344	AT5G20950.1 | Symbols: | Glycosyl hydrolase family protein | chr5:7107609-7110775 REVERSE LENGTH=624	Putative beta-D-xylosidase (Fragment) OS=Prunus persica PE=2 SV=1	Plasmamembrane;	27.7238	27.7761	27.7771	25.4334	24.7584	25.7799	27.7692	27.8845	27.151	24.7281	25.074	25.1189	14	19.4	131.61	9.047	-0.0656928	0	60.939
Pg_S1296.22	Sucrose-6F-phosphate phosphohydrolase family protein	AT2G35840.1	A9CK30	AT2G35840.1 | Symbols: | Sucrose-6F-phosphate phosphohydrolase family protein | chr2:15053952-15055776 FORWARD LENGTH=422	Mannosylfructose-phosphate phosphatase OS=Agrobacterium tumefaciens (strain C58 / ATCC 33970) GN=mfppA PE=1 SV=1	Cytoplasmic;	25.0511	25.2339	24.9316	26.044	26.3947	26.0192	25.7966	25.7064	25.4852	26.2523	26.0637	25.8818	6	38.6	47.887	5.7	-0.289882	0	11.284
Pg_S1016.10	semialdehyde dehydrogenase family protein	AT1G14810.1	P57008	AT1G14810.1 | Symbols: | semialdehyde dehydrogenase family protein | chr1:5102684-5104633 REVERSE LENGTH=375	Aspartate-semialdehyde dehydrogenase OS=Neisseria meningitidis serogroup A / serotype 4A (strain Z2491) GN=asd PE=3 SV=1	Cytoplasmic; Chloroplast;	28.9529	28.5637	28.4709	27.5486	27.6929	27.8356	27.8056	27.5925	27.6832	27.5088	27.9426	27.7835	1	36.9	33.275	5.403	-0.138235	0	54.533
Pg_S1029.23	translocon at the outer envelope membrane of chloroplasts 34	AT5G05000.2	Q6S5G3	AT5G05000.2 | Symbols: TOC34, ATTOC34, OEP34 | translocon at the outer envelope membrane of chloroplasts 34 | chr5:1474262-1475772 REVERSE LENGTH=313	Translocase of chloroplast 90, chloroplastic OS=Arabidopsis thaliana GN=TOC90 PE=1 SV=1	Mitochondrial; Chloroplast;	24.5934	25.0463	25.2834	26.8684	26.9804	26.6475	27.3454	27.3979	26.9415	26.3142	26.5499	26.7085	6	38	33.74	9.72	-0.0767213	0	41.596
Pg_S1031.16	glutamate synthase 1	AT5G04140.2	O87392	AT5G04140.2 | Symbols: GLU1, GLS1, GLUS, FD-GOGAT | glutamate synthase 1 | chr5:1130031-1138186 FORWARD LENGTH=1648	Glutamate synthase large subunit-like protein OS=Rhizobium meliloti (strain 1021) GN=glxD PE=3 SV=2	Chloroplast;	33.8667	33.8275	33.8064	32.536	32.6905	32.5832	32.2552	32.2855	32.1807	32.523	32.4611	32.4652	9	53	176.89	6.224	-0.153666	0	323.31
Pg_S1038.31	Cytosol aminopeptidase family protein	AT4G30920.1	Q41382	AT4G30920.1 | Symbols: | Cytosol aminopeptidase family protein | chr4:15046589-15049304 REVERSE LENGTH=583	DEAD-box ATP-dependent RNA helicase 7 OS=Spinacia oleracea GN=RH7 PE=2 SV=1	Cytoplasmic; Chloroplast;	30.3301	30.641	30.4035	31.0818	30.9591	31.1315	30.2392	30.1947	30.161	30.9786	31.0215	30.9417	8	80.2	54.813	5.282	0.0322519	0	311.98
Pg_S1051.9	Cyclophilin-like peptidyl-prolyl cis-trans isomerase family protein	AT4G33060.1	P52015	AT4G33060.1 | Symbols: | Cyclophilin-like peptidyl-prolyl cis-trans isomerase family protein | chr4:15948535-15951954 FORWARD LENGTH=504	Peptidyl-prolyl cis-trans isomerase 7 OS=Caenorhabditis elegans GN=cyn-7 PE=1 SV=2	Chloroplast;	28.1578	28.2197	28.0277	28.9983	29.0846	29.1068	27.1194	27.2475	27.5113	29.0562	29.0271	29.0796	12	28.3	50.142	6.391	-0.135076	0	70.309
Pg_S1058.4	Phosphofructokinase family protein	AT1G12000.1	O51669	AT1G12000.1 | Symbols: | Phosphofructokinase family protein | chr1:4050159-4053727 REVERSE LENGTH=566	ATP-dependent 6-phosphofructokinase OS=Borrelia burgdorferi (strain ATCC 35210 / B31 / CIP 102532 / DSM 4680) GN=pfkA PE=3 SV=2	Cytoplasmic;	28.4666	28.7686	28.7712	28.0027	28.068	28.1707	28.1335	28.2483	28.0306	27.5447	27.6917	27.7767	5	63.5	61.198	5.976	-0.178114	0	171.02
Pg_S2464.21	fibrillin	AT4G04020.1	Q5M755	AT4G04020.1 | Symbols: FIB | fibrillin | chr4:1932161-1933546 FORWARD LENGTH=318	Probable plastid-lipid-associated protein 7, chloroplastic OS=Arabidopsis thaliana GN=PAP7 PE=2 SV=1	Chloroplast;	30.9979	30.9144	30.5425	31.2618	31.2428	31.1777	28.5343	28.4869	28.3053	31.1898	31.0562	30.8953	11	49.7	34.459	5.956	-0.155063	0	323.31
Pg_S1064.5	phosphoglucose isomerase 1	AT4G24620.1	Q48N88	AT4G24620.1 | Symbols: PGI1, PGI | phosphoglucose isomerase 1 | chr4:12708972-12712610 REVERSE LENGTH=613	Glucose-6-phosphate isomerase OS=Pseudomonas syringae pv. phaseolicola (strain 1448A / Race 6) GN=pgi PE=3 SV=1	Cytoplasmic;	25.7646	25.575	25.9413	27.5132	27.2226	27.3026	28.4399	28.3507	28.3991	26.4968	26.6457	26.9313	15	70.3	34.277	4.818	0.0230032	0	187
Pg_S1067.24	FTSH protease 8	AT1G06430.1	Q9C5U3	AT1G06430.1 | Symbols: FTSH8 | FTSH protease 8 | chr1:1960214-1962525 REVERSE LENGTH=685	26S protease regulatory subunit 8 homolog A OS=Arabidopsis thaliana GN=RPT6A PE=1 SV=1	Chloroplast;	26.9278	26.8526	26.9106	27.7271	27.7927	27.6994	28.0526	27.972	28.0473	27.9682	28.2096	27.9572	1	58.7	74.329	5.717	-0.0920635	0	97.654
Pg_S1075.12	FAD-binding Berberine family protein	AT4G20840.1	P93762	AT4G20840.1 | Symbols: | FAD-binding Berberine family protein | chr4:11157916-11159535 FORWARD LENGTH=539	Hexose oxidase OS=Chondrus crispus GN=HOX PE=1 SV=2	Plasmamembrane;	33.2679	33.0496	33.0216	30.9564	31.0111	31.0278	28.8335	29.122	29.3663	30.8857	31.051	30.9455	7	40.6	60.161	9.227	-0.0884112	0	299.58
Pg_S1092.4	F-box family protein with a domain of unknown function (DUF295)	AT4G22030.1	O65451	AT4G22030.1 | Symbols: | F-box family protein with a domain of unknown function (DUF295) | chr4:11672396-11675575 FORWARD LENGTH=626	Probable F-box protein At4g22030 OS=Arabidopsis thaliana GN=At4g22030 PE=4 SV=1	Extracellular; Nuclear;	30.9847	30.8829	31.1213	32.352	32.3649	32.347	31.1903	31.2532	31.3091	32.0769	32.113	32.1777	16	44.8	49.017	4.624	-0.292217	0	72.647
Pg_S1095.20	integral membrane TerC family protein	AT5G12130.1	Q8K9X4	AT5G12130.1 | Symbols: PDE149, ATTERC | integral membrane TerC family protein | chr5:3919613-3922154 FORWARD LENGTH=384	Uncharacterized membrane protein BUsg_160 OS=Buchnera aphidicola subsp. Schizaphis graminum (strain Sg) GN=BUsg_160 PE=3 SV=1	Plasmamembrane;	29.919	30.0675	30.0779	29.9293	29.8638	29.9512	28.0506	28.0271	27.6499	30.1812	30.3052	30.3192	6	17.5	84.264	5.394	-0.0925134	0	37.023
Pg_S1097.9	Glycosyl hydrolase family 38 protein	AT3G26720.1	Q64542	AT3G26720.1 | Symbols: | Glycosyl hydrolase family 38 protein | chr3:9816707-9823056 FORWARD LENGTH=1019	Plasma membrane calcium-transporting ATPase 4 OS=Rattus norvegicus GN=Atp2b4 PE=2 SV=1	Cytoplasmic;	29.8165	29.8514	29.8838	27.8043	27.76	27.8639	29.4948	29.4815	29.5299	27.9524	27.7482	27.7565	4	36.3	112.35	5.692	-0.313433	0	237.24
Pg_S1104.18	phosphatase-related	AT4G23570.3	Q2KIK0	AT4G23570.3 | Symbols: SGT1A | phosphatase-related | chr4:12300015-12302493 FORWARD LENGTH=351	Suppressor of G2 allele of SKP1 homolog OS=Bos taurus GN=SUGT1 PE=2 SV=1	Cytoplasmic;	26.1854	26.0576	26.2955	25.7174	25.6847	25.872	26.2932	26.0883	26.0481	25.7784	26.0189	25.7735	3	24.7	41.412	4.814	-0.533871	0	29.427
Pg_S1106.21	presequence protease 1	AT3G19170.1	Q6BTC0	AT3G19170.1 | Symbols: ATPREP1, ATZNMP, PREP1 | presequence protease 1 | chr3:6625578-6631874 REVERSE LENGTH=1080	Mitochondrial presequence protease OS=Debaryomyces hansenii (strain ATCC 36239 / CBS 767 / JCM 1990 / NBRC 0083 / IGC 2968) GN=CYM1 PE=3 SV=2	Cytoplasmic; Nuclear;	31.8586	31.84	31.8092	31.8146	31.8217	31.8234	31.6518	31.6269	31.6013	31.8358	31.693	31.7809	7	67.4	119.84	5.464	-0.337547	0	323.31
Pg_S1106.3	3-deoxy-D-arabino-heptulosonate 7-phosphate synthase 1	AT4G39980.1	P55911	AT4G39980.1 | Symbols: DHS1 | 3-deoxy-D-arabino-heptulosonate 7-phosphate synthase 1 | chr4:18539654-18541832 FORWARD LENGTH=525	Phospho-2-dehydro-3-deoxyheptonate aldolase (Fragment) OS=Streptomyces lividans PE=3 SV=1	Mitochondrial; Chloroplast;	25.7735	26.2883	26.0676	26.8954	26.648	26.8637	27.305	27.5183	27.5686	26.5583	26.8067	26.7107	1	19.2	58.102	7.579	-0.360845	0	52.867
Pg_S1106.38	3-methylcrotonyl-CoA carboxylase	AT4G34030.1	Q06700	AT4G34030.1 | Symbols: MCCB | 3-methylcrotonyl-CoA carboxylase | chr4:16301298-16303949 FORWARD LENGTH=587	Glutaconyl-CoA decarboxylase subunit alpha OS=Acidaminococcus fermentans (strain ATCC 25085 / DSM 20731 / VR4) GN=gcdA PE=1 SV=1	Cytoplasmic; Mitochondrial; Chloroplast	27.4091	27.2873	27.4608	26.7764	26.8585	26.9609	26.7613	26.5625	26.3921	26.8003	26.6863	26.8132	11	27.1	71.663	6.489	-0.0635258	0	34.598
Pg_S1116.22	glyoxalase I homolog	AT1G11840.6	Q8H0V3	AT1G11840.6 | Symbols: GLX1 | glyoxalase I homolog | chr1:3995928-3997518 FORWARD LENGTH=322	Lactoylglutathione lyase OS=Arabidopsis thaliana GN=At1g08110 PE=2 SV=1	Cytoplasmic;	30.0144	29.7514	29.7902	30.2033	30.2156	30.1933	29.1183	28.8852	29.1153	30.2826	30.1545	30.2774	12	51.4	33.255	5.088	-0.403378	0	100.12
Pg_S1124.2	UDP-GLUCOSE PYROPHOSPHORYLASE 1	AT3G03250.1	Q8SSC5	AT3G03250.1 | Symbols: UGP, UGP1, AtUGP1 | UDP-GLUCOSE PYROPHOSPHORYLASE 1 | chr3:749761-754014 REVERSE LENGTH=469	UTP--glucose-1-phosphate uridylyltransferase OS=Encephalitozoon cuniculi (strain GB-M1) GN=UGP1 PE=1 SV=1	Cytoplasmic; Mitochondrial;	29.8995	29.6744	29.8352	31.6897	31.6987	31.7825	30.5723	30.4826	30.6554	31.2744	31.4917	31.3631	7	40	86.847	8.613	-0.184137	0	323.31
Pg_S1124.27	NADH-ubiquinone dehydrogenase, mitochondrial, putative	AT5G37510.2	Q34312	AT5G37510.2 | Symbols: EMB1467, CI76 | NADH-ubiquinone dehydrogenase, mitochondrial, putative | chr5:14897490-14900447 FORWARD LENGTH=748	NADH-ubiquinone oxidoreductase 75 kDa subunit OS=Dictyostelium discoideum GN=nad11 PE=3 SV=1	Cytoplasmic; Mitochondrial;	29.3006	29.4067	29.3879	28.6363	28.762	28.8557	28.368	28.5017	28.6197	28.7156	28.668	28.6237	3	32.8	80.992	6.224	-0.16371	0	119.18
Pg_S5064.6	Inositol monophosphatase family protein	AT5G63980.1	Q45499	AT5G63980.1 | Symbols: SAL1, ALX8, ATSAL1, HOS2, FRY1, RON1 | Inositol monophosphatase family protein | chr5:25609840-25611802 FORWARD LENGTH=407	Inositol-1-monophosphatase OS=Bacillus subtilis (strain 168) GN=suhB PE=3 SV=1	Cytoplasmic;	30.2325	29.8284	29.8178	29.0859	29.2728	29.2001	29.6002	29.5748	29.5247	28.925	28.8854	28.7771	13	52.4	37.183	5.906	-0.145	0	323.31
Pg_S1133.3	Leucine-rich repeat (LRR) family protein	AT1G33590.1	Q3V1N1	AT1G33590.1 | Symbols: | Leucine-rich repeat (LRR) family protein | chr1:12177788-12179221 FORWARD LENGTH=477	Malignant fibrous histiocytoma-amplified sequence 1 homolog OS=Mus musculus GN=Mfhas1 PE=2 SV=2	Extracellular; Cytoplasmic;	28.5073	28.5434	28.632	26.8615	26.9547	26.9776	28.9882	28.6802	28.8648	26.6763	26.449	26.6867	17	50.7	61.249	4.978	-0.0803249	0	159.61
Pg_S1135.37	beta-galactosidase 8	AT2G28470.1	Q54MV6	AT2G28470.1 | Symbols: BGAL8 | beta-galactosidase 8 | chr2:12169047-12173164 REVERSE LENGTH=852	Probable beta-galactosidase 2 OS=Dictyostelium discoideum GN=glb2 PE=3 SV=1	Extracellular; Lysosomal;	27.0298	27.2645	26.9535	25.3542	25.4798	25.4641	26.4668	27.052	26.8616	25.2994	25.3693	25.0176	4	26	92.155	5.66	-0.188402	0	29.178
Pg_S1135.9	chaperonin-60alpha	AT2G28000.1	Q89IK8	AT2G28000.1 | Symbols: CPN60A, CH-CPN60A, SLP | chaperonin-60alpha | chr2:11926603-11929184 FORWARD LENGTH=586	60 kDa chaperonin 6 OS=Bradyrhizobium diazoefficiens (strain JCM 10833 / IAM 13628 / NBRC 14792 / USDA 110) GN=groL6 PE=3 SV=1	Mitochondrial; Chloroplast;	27.2822	27.2771	27.309	29.8753	29.9203	30.0054	30.2077	30.3057	30.1984	29.9657	29.9278	29.9512	7	63.4	62.141	4.988	-0.0294218	0	257.98
Pg_S1142.4	hydroxymethylbilane synthase	AT5G08280.1	B4S922	AT5G08280.1 | Symbols: HEMC | hydroxymethylbilane synthase | chr5:2663763-2665596 REVERSE LENGTH=382	Porphobilinogen deaminase OS=Prosthecochloris aestuarii (strain DSM 271 / SK 413) GN=hemC PE=3 SV=1	Mitochondrial; Chloroplast;	25.8617	24.8184	26.1741	26.6934	26.1841	26.1439	30.7771	31.0272	30.5488	27.0604	26.9384	26.6081	2	55.3	40.505	6.159	-0.0795213	0	323.31
Pg_S1147.6	phosphoglucomutase	AT5G51820.1	P33401	AT5G51820.1 | Symbols: PGM, ATPGMP, PGM1, STF1 | phosphoglucomutase | chr5:21063531-21067933 REVERSE LENGTH=623	Phosphoglucomutase-1 OS=Saccharomyces cerevisiae (strain ATCC 204508 / S288c) GN=PGM1 PE=1 SV=1	Chloroplast;	29.9443	29.7676	29.6682	28.8216	29.0416	28.8178	29.321	29.2631	29.2001	29.1323	28.8902	28.9197	5	45.1	68.582	5.476	-0.168949	0	124.79
Pg_S1150.1	hydroxyproline-rich glycoprotein family protein	AT5G16620.1	Q5ZLF0	AT5G16620.1 | Symbols: PDE120, TIC40, ATTIC40 | hydroxyproline-rich glycoprotein family protein | chr5:5450808-5454256 FORWARD LENGTH=447	Hsc70-interacting protein OS=Gallus gallus GN=ST13 PE=2 SV=1	Extracellular; Nuclear;	28.8235	29.0275	29.1534	27.6565	27.501	27.6182	28.8932	28.9142	28.9592	27.8556	27.8783	27.7072	7	32	38.37	6.239	-1.08783	0	78.74
Pg_S1167.1	regulatory particle triple-A ATPase 5A	AT3G05530.1	A9GAW6	AT3G05530.1 | Symbols: RPT5A, ATS6A.2 | regulatory particle triple-A ATPase 5A | chr3:1603540-1605993 FORWARD LENGTH=424	ATP-dependent zinc metalloprotease FtsH 3 OS=Sorangium cellulosum (strain So ce56) GN=ftsH3 PE=3 SV=1	Cytoplasmic;	26.4958	26.5396	26.6701	28.3235	28.2488	28.1622	28.0331	28.2096	28.0338	27.9808	28.1063	28.1692	14	48.1	43.862	5.004	-0.461125	0	163.87
Pg_S1171.21	cytochrome P450, family 97, subfamily B, polypeptide 3	AT4G15110.1	Q7KWN2	AT4G15110.1 | Symbols: CYP97B3 | cytochrome P450, family 97, subfamily B, polypeptide 3 | chr4:8629922-8632993 REVERSE LENGTH=580	Probable cytochrome P450 525A1 OS=Dictyostelium discoideum GN=cyp525A1 PE=3 SV=1	Cytoplasmic; Mitochondrial;	26.3182	26.4533	26.2891	27.5838	27.521	27.3611	26.7247	26.6543	26.8226	27.4383	27.3179	27.0945	12	29.1	65.969	6.071	-0.199316	0	40.258
Pg_S1171.28	heat shock protein 70 (Hsp 70) family protein	AT3G09440.1	Q83MH5	AT3G09440.1 | Symbols: | Heat shock protein 70 (Hsp 70) family protein | chr3:2903434-2905632 REVERSE LENGTH=649	Chaperone protein DnaK OS=Shigella flexneri GN=dnaK PE=3 SV=1	Cytoplasmic; ER; Nuclear	29.8141	29.7772	29.8686	28.0095	28.157	28.1577	28.0421	28.1853	27.8748	28.0066	28.0017	27.6847	20	42.1	99.134	5.296	-0.47764	0	120
Pg_S1171.52	photosystem II subunit P-1	AT1G06680.1	P11471	AT1G06680.1 | Symbols: PSBP-1, OEE2, PSII-P, OE23 | photosystem II subunit P-1 | chr1:2047940-2049186 FORWARD LENGTH=263	Oxygen-evolving enhancer protein 2, chloroplastic OS=Chlamydomonas reinhardtii GN=PSBP PE=1 SV=1	Cytoplasmic; Chloroplast;	32.9576	32.5837	32.6309	33.1887	33.4448	33.6198	33.9242	33.9026	33.9115	33.2618	33.4615	33.3122	12	79.8	19.713	6.822	-0.336066	0	323.31
Pg_S1176.7	NAD(P)-binding Rossmann-fold superfamily protein	AT1G30620.1	Q31FG4	AT1G30620.1 | Symbols: HSR8, MUR4, UXE1 | NAD(P)-binding Rossmann-fold superfamily protein | chr1:10855496-10857970 FORWARD LENGTH=419	ADP-L-glycero-D-manno-heptose-6-epimerase OS=Thiomicrospira crunogena (strain XCL-2) GN=hldD PE=3 SV=1	Chloroplast;	27.1045	27.2738	27.2122	29.4593	29.3597	29.2897	27.8968	27.8883	27.9047	28.8161	29.0189	29.0254	5	34.6	33.496	5.403	0.0355769	0	46.403
Pg_S5440.1	GroES-like zinc-binding dehydrogenase family protein	AT5G24760.1	Q9P6I8	AT5G24760.1 | Symbols: | GroES-like zinc-binding dehydrogenase family protein | chr5:8495035-8497245 REVERSE LENGTH=381	Zinc-type alcohol dehydrogenase-like protein C1198.01 OS=Schizosaccharomyces pombe (strain 972 / ATCC 24843) GN=SPBC1198.01 PE=3 SV=1	Cytoplasmic;	30.711	30.6207	30.6151	29.7557	29.678	29.7824	29.4324	29.3702	29.0584	29.6232	29.5317	29.5723	13	46.7	44.07	7.817	-0.0246944	0	180.55
Pg_S1185.40	CLIP-associated protein	AT2G20190.1	Q6NYW6	AT2G20190.1 | Symbols: ATCLASP, CLASP | CLIP-associated protein | chr2:8711862-8718813 REVERSE LENGTH=1439	CLIP-associating protein 2 OS=Danio rerio GN=clasp2 PE=2 SV=1	Nuclear;	29.3578	29.4082	29.3086	30.6393	30.5423	30.5204	29.393	29.7742	29.6195	30.7326	30.8082	30.7198	5	17.4	219.95	6.827	-0.212307	0	161.24
Pg_S1185.46	UDP-Glycosyltransferase superfamily protein	AT4G01070.1	P34317	AT4G01070.1 | Symbols: GT72B1, UGT72B1 | UDP-Glycosyltransferase superfamily protein | chr4:461858-463300 REVERSE LENGTH=480	Putative UDP-glucuronosyltransferase ugt-60 OS=Caenorhabditis elegans GN=ugt-60 PE=3 SV=2	Cytoplasmic;	25.5723	26.3111	26.2749	24.6734	24.6979	24.7208	25.1556	24.9753	24.9995	23.9606	24.2816	24.2995	5	12.6	66.899	5.666	-0.217734	0	14.214
Pg_S1195.2	Plastid-lipid associated protein PAP / fibrillin family protein	AT2G46910.1	Q8W4F1	AT2G46910.1 | Symbols: | Plastid-lipid associated protein PAP / fibrillin family protein | chr2:19272427-19273856 FORWARD LENGTH=284	Probable plastid-lipid-associated protein 10, chloroplastic OS=Arabidopsis thaliana GN=PAP10 PE=2 SV=1	Cytoplasmic; Nuclear;	30.3883	29.9066	30.3138	30.6341	30.6118	30.5143	28.8014	28.5366	28.6995	30.5898	30.4154	30.3457	4	40.9	37.972	4.889	-0.305714	0	277.5
Pg_S1195.30	isopropyl malate isomerase large subunit 1	AT4G13430.1	Q3IJS4	AT4G13430.1 | Symbols: IIL1, ATLEUC1 | isopropyl malate isomerase large subunit 1 | chr4:7804194-7807789 REVERSE LENGTH=509	3-isopropylmalate dehydratase large subunit OS=Pseudoalteromonas haloplanktis (strain TAC 125) GN=leuC PE=3 SV=1	Cytoplasmic; Chloroplast;	26.5696	26.4287	26.3988	26.4423	26.2756	26.2847	27.9654	28.0942	27.8304	26.4332	26.2071	26.5284	10	36.8	55.562	6.365	-0.227559	0	122.63
Pg_S1197.3	peptidase M1 family protein	AT1G63770.5	Q2GY21	AT1G63770.5 | Symbols: | Peptidase M1 family protein | chr1:23657791-23664243 REVERSE LENGTH=1013	Leukotriene A-4 hydrolase homolog OS=Chaetomium globosum (strain ATCC 6205 / CBS 148.51 / DSM 1962 / NBRC 6347 / NRRL 1970) GN=CHGG_07133 PE=3 SV=1	Chloroplast;	26.0948	26.0477	25.8217	28.13	28.1566	28.1184	27.9549	27.9649	28.1552	27.9686	27.9165	27.9004	18	44.1	69.082	5.103	-0.230882	0	94.711
Pg_S1199.16	photosynthetic electron transfer A	ATCG00540.1	B0YPP2	ATCG00540.1 | Symbols: PETA | photosynthetic electron transfer A | chrC:61657-62619 FORWARD LENGTH=320	Plastid envelope membrane protein OS=Aneura mirabilis GN=cemA PE=3 SV=1	Mitochondrial; Chloroplast;	33.6143	33.2051	33.3303	32.4034	32.3147	32.4561	31.4879	31.5187	31.5052	32.5337	32.5862	32.5382	16	51.8	30.518	9.152	-0.2175	0	323.31
Pg_S5453.1	6,7-dimethyl-8-ribityllumazine synthase / DMRL synthase / lumazine synthase / riboflavin synthase	AT2G44050.1	B1MYJ5	AT2G44050.1 | Symbols: COS1 | 6,7-dimethyl-8-ribityllumazine synthase / DMRL synthase / lumazine synthase / riboflavin synthase | chr2:18224304-18225917 FORWARD LENGTH=227	6,7-dimethyl-8-ribityllumazine synthase OS=Leuconostoc citreum (strain KM20) GN=ribH PE=3 SV=1	Chloroplast;	24.9724	25.0986	25.4123	28.0039	27.8817	27.5586	27.263	26.7255	26.6927	27.3956	26.9971	27.1578	6	25	25.509	8.142	0.0820833	0	22.967
Pg_S1202.12	calnexin 1	AT5G61790.1	Q96L12	AT5G61790.1 | Symbols: CNX1, ATCNX1 | calnexin 1 | chr5:24827394-24829642 REVERSE LENGTH=530	Calreticulin-3 OS=Homo sapiens GN=CALR3 PE=1 SV=2	Cytoplasmic; ER;	31.1217	30.9663	30.9349	30.205	30.1338	30.0634	30.3292	30.2308	30.1972	30.1569	30.0729	30.0911	1	39.7	61.434	4.71	-0.787013	0	145.06
Pg_S3345.10	pyruvate dehydrogenase E1 alpha	AT1G01090.1	F4KIN4	AT1G01090.1 | Symbols: PDH-E1 ALPHA | pyruvate dehydrogenase E1 alpha | chr1:47705-49166 REVERSE LENGTH=428	Putative 2-dehydropantoate 2-reductase OS=Arabidopsis thaliana GN=KPR PE=3 SV=1	Mitochondrial; Chloroplast;	25.5433	26.1383	25.8801	26.6523	26.3172	26.2417	27.2648	26.9944	26.7889	26.723	26.2791	26.3386	6	34.3	47.914	6.448	-0.269816	0	59.493
Pg_S1205.13	-	-	-	-	-	Cytoplasmic;	27.0566	27.4977	27.3685	25.2558	25.2009	25.8327	28.2802	28.2446	28.4464	25.4677	25.5861	25.0607	3	37.2	39.971	4.202	-0.236957	0	142.8
Pg_S1205.5	catalase 2	AT4G35090.1	Q73WB6	AT4G35090.1 | Symbols: CAT2 | catalase 2 | chr4:16700937-16703215 REVERSE LENGTH=492	Catalase-related peroxidase OS=Mycobacterium paratuberculosis (strain ATCC BAA-968 / K-10) GN=MAP_2744c PE=1 SV=1	Peroxisomal;	32.489	32.5452	32.5212	32.4361	32.7181	32.5652	30.4236	30.4196	30.0788	32.482	32.5921	32.6215	3	60.6	56.798	6.833	-0.553862	0	323.31
Pg_S5239.3	Pyruvate kinase family protein	AT5G56350.1	P19680	AT5G56350.1 | Symbols: | Pyruvate kinase family protein | chr5:22820254-22822529 REVERSE LENGTH=498	Pyruvate kinase (Fragment) OS=Spiroplasma citri GN=pyk PE=3 SV=1	Cytoplasmic;	27.5923	27.5176	27.6426	28.2588	28.696	28.5668	27.1903	27.3417	27.4527	27.8021	27.8033	27.7889	5	42.4	55.277	7.905	0.0505882	0	120.22
Pg_S1227.8	high cyclic electron flow 1	AT3G54050.1	B2JEJ7	AT3G54050.1 | Symbols: HCEF1 | high cyclic electron flow 1 | chr3:20016951-20018527 FORWARD LENGTH=417	Fructose-1,6-bisphosphatase class 1 1 OS=Burkholderia phymatum (strain DSM 17167 / STM815) GN=fbp1 PE=3 SV=1	Chloroplast;	33.1742	33.3311	33.3394	31.8269	31.7042	31.9094	31.8931	31.833	31.7764	32.0044	32.0124	31.8256	17	53.5	38.654	4.617	-0.104762	0	323.31
Pg_S1231.2	eukaryotic translation initiation factor 4A1	AT3G13920.2	A5DWJ1	AT3G13920.2 | Symbols: EIF4A1, RH4, TIF4A1 | eukaryotic translation initiation factor 4A1 | chr3:4592586-4594128 REVERSE LENGTH=415	ATP-dependent RNA helicase FAL1 OS=Lodderomyces elongisporus (strain ATCC 11503 / CBS 2605 / JCM 1781 / NBRC 1676 / NRRL YB-4239) GN=FAL1 PE=3 SV=1	Cytoplasmic; Nuclear;	24.7341	24.8481	24.8498	25.1742	25.1516	25.765	25.3939	25.6504	25.2123	26.0592	25.9729	26.1603	1	55	46.477	5.119	-0.210706	0	12.279
Pg_S1235.1	Translation elongation factor EF1A/initiation factor IF2gamma family protein	AT1G18070.3	B2VG01	AT1G18070.3 | Symbols: | Translation elongation factor EF1A/initiation factor IF2gamma family protein | chr1:6214236-6218211 REVERSE LENGTH=543	Sulfate adenylyltransferase subunit 1 OS=Erwinia tasmaniensis (strain DSM 17950 / Et1/99) GN=cysN PE=3 SV=1	Cytoplasmic;	26.5437	26.1526	26.8289	27.5775	27.5873	27.3858	27.5195	27.418	27.6699	27.4724	27.2162	27.4019	14	32.1	67.156	5.418	-0.25626	0	53.112
Pg_S1237.31	Translation elongation factor EFG/EF2 protein	AT1G45332.1	B7HQU1	AT1G45332.1 | Symbols: | Translation elongation factor EFG/EF2 protein | chr1:17172507-17176683 REVERSE LENGTH=754	Elongation factor G OS=Bacillus cereus (strain AH187) GN=fusA PE=3 SV=1	Chloroplast;	31.3252	31.3816	31.2995	31.2177	31.3491	31.2817	31.3481	31.3379	31.2979	31.3092	31.2088	31.2551	4	64.3	86.52	5.177	-0.208492	0	323.31
Pg_S1240.38	D-3-phosphoglycerate dehydrogenase	AT4G34200.1	A1A9T1	AT4G34200.1 | Symbols: EDA9 | D-3-phosphoglycerate dehydrogenase | chr4:16374041-16376561 REVERSE LENGTH=603	Glyoxylate/hydroxypyruvate reductase A OS=Escherichia coli O1:K1 / APEC GN=ghrA PE=3 SV=2	Cytoplasmic; Chloroplast;	28.6806	28.6976	28.4722	29.0541	29.1014	28.9888	29.7293	29.5105	29.3027	29.3092	29.35	29.0525	2	66.3	57.468	5.399	0.188828	0	323.31
Pg_S1240.48	S-methyl-5-thioribose kinase	AT1G49820.1	A8FCG6	AT1G49820.1 | Symbols: ATMTK, MTK | S-methyl-5-thioribose kinase | chr1:18443005-18444907 FORWARD LENGTH=420	Methylthioribose kinase OS=Bacillus pumilus (strain SAFR-032) GN=mtnK PE=3 SV=1	Cytoplasmic;	26.5471	26.5859	26.7622	28.0173	28.0084	28.2233	27.1954	26.5789	26.698	28.0456	28.1338	28.1985	1	39.5	44.112	5.872	-0.216279	0	54.219
Pg_S1242.10	RNA-binding (RRM/RBD/RNP motifs) family protein	AT4G14300.1	Q6GLB5	AT4G14300.1 | Symbols: | RNA-binding (RRM/RBD/RNP motifs) family protein | chr4:8231179-8232785 FORWARD LENGTH=411	ELAV-like protein 1 OS=Xenopus tropicalis GN=elavl1 PE=2 SV=1	Mitochondrial; Chloroplast;	26.9931	26.8345	26.6487	26.4882	26.1573	26.5506	25.1937	25.4407	25.6735	25.9499	25.9352	25.9205	11	28.8	60.704	8.278	-0.353153	0	23.661
Pg_S1242.3	Glycosyl transferase, family 35	AT3G29320.1	P29849	AT3G29320.1 | Symbols: | Glycosyl transferase, family 35 | chr3:11252871-11257587 FORWARD LENGTH=962	Maltodextrin phosphorylase OS=Streptococcus pneumoniae serotype 4 (strain ATCC BAA-334 / TIGR4) GN=malP PE=3 SV=2	Cytoplasmic; Chloroplast;	25.9175	25.493	25.9192	26.0262	26.632	26.3991	25.1529	25.3576	25.0083	25.6469	25.3466	25.5668	5	49.6	108.86	4.949	-0.342708	0	21.179
Pg_S1242.42	casein lytic proteinase B3	AT5G15450.1	O15885	AT5G15450.1 | Symbols: APG6, CLPB3, CLPB-P | casein lytic proteinase B3 | chr5:5014399-5018255 REVERSE LENGTH=968	Heat shock protein 100 (Fragment) OS=Trypanosoma cruzi GN=HSP100 PE=3 SV=1	Cytoplasmic; Mitochondrial;	28.3495	28.523	28.4249	30.2036	30.1861	30.0869	28.8214	28.6462	28.8366	30.1142	30.1703	30.0835	3	45.1	103.87	5.89	-0.455157	0	251.74
Pg_S1249.2	mercaptopyruvate sulfurtransferase 1	AT1G79230.1	P91247	AT1G79230.1 | Symbols: ST1, ATMST1, MST1, ATRDH1, STR1 | mercaptopyruvate sulfurtransferase 1 | chr1:29800824-29803679 FORWARD LENGTH=379	Putative thiosulfate sulfurtransferase mpst-4 OS=Caenorhabditis elegans GN=mpst-4 PE=2 SV=1	Chloroplast;	27.1988	27.2613	27.2443	27.4395	27.3296	27.7718	27.1922	27.3081	28.1301	27.2442	27.4444	27.212	3	55.6	41.49	6.477	-0.230053	0	68.922
Pg_S1254.9	eukaryotic translation initiation factor 3A	AT4G11420.1	Q9XHR2	AT4G11420.1 | Symbols: EIF3A, ATEIF3A-1, EIF3A-1, ATTIF3A1, TIF3A1 | eukaryotic translation initiation factor 3A | chr4:6947834-6952053 REVERSE LENGTH=987	Eukaryotic translation initiation factor 3 subunit A OS=Zea mays GN=TIF3A1 PE=2 SV=1	Cytoplasmic; Cytoskeletal; Nuclear	22.6403	24.3063	24.0566	24.1794	23.9868	23.6423	26.4898	26.4615	26.1378	23.9136	25.8646	25.939	3	15.7	109.65	9.232	-0.734185	0	87.754
Pg_S1255.11	ureidoglycine aminohydrolase	AT4G17050.1	Q7F1K9	AT4G17050.1 | Symbols: UGLYAH | ureidoglycine aminohydrolase | chr4:9589662-9592413 FORWARD LENGTH=298	Probable (S)-ureidoglycine aminohydrolase OS=Oryza sativa subsp. japonica GN=UGLYAH PE=1 SV=1	Lysosomal;	28.0214	27.3742	28.177	25.0106	25.5568	25.7334	26.1995	25.8066	25.954	25.4423	25.3219	25.7516	1	20	34.12	6.389	-0.0747541	0	14.189
Pg_S1259.3	pfkB-like carbohydrate kinase family protein	AT5G58730.1	-	AT5G58730.1 | Symbols: | pfkB-like carbohydrate kinase family protein | chr5:23723627-23725324 REVERSE LENGTH=353	-	Cytoplasmic; Chloroplast;	29.3401	29.4012	29.2748	30.0437	30.0469	30.1796	30.3846	30.2443	30.2256	30.1392	29.983	29.8914	3	69.1	35.036	5.138	0.0737003	0	321.31
Pg_S1270.20	Subtilase family protein	AT5G67360.1	P40903	AT5G67360.1 | Symbols: ARA12 | Subtilase family protein | chr5:26872192-26874465 REVERSE LENGTH=757	Sexual differentiation process putative subtilase-type proteinase isp6 OS=Schizosaccharomyces pombe (strain 972 / ATCC 24843) GN=isp6 PE=2 SV=1	Plasmamembrane;	29.2481	29.3799	29.9269	27.2819	26.9342	27.0076	26.0686	26.0931	26.6022	27.3394	27.1337	26.9627	3	17.3	38.944	5.635	-0.0662011	0	24.478
Pg_S1275.6	lipoxygenase 2	AT3G45140.1	Q8GSM3	AT3G45140.1 | Symbols: LOX2, ATLOX2 | lipoxygenase 2 | chr3:16525437-16529233 FORWARD LENGTH=896	Lipoxygenase 2.2, chloroplastic OS=Hordeum vulgare GN=LOX2.2 PE=1 SV=1	Cytoplasmic;	33.1235	33.1296	32.9865	33.3296	33.4217	33.3016	29.9222	29.938	29.8825	33.3599	33.1188	33.2126	43	53.5	106.17	7.065	-0.437942	0	323.31
Pg_S1275.7	plastid transcriptionally active 16	AT3G46780.1	Q8H0U5	AT3G46780.1 | Symbols: PTAC16 | plastid transcriptionally active 16 | chr3:17228766-17231021 FORWARD LENGTH=510	Protein TIC 62, chloroplastic OS=Arabidopsis thaliana GN=TIC62 PE=1 SV=1	Mitochondrial; Chloroplast;	30.5302	30.8483	30.332	30.2448	30.7078	30.4219	30.0152	29.987	30.0441	30.4383	30.1935	30.3057	5	48.2	55.093	9.308	-0.281359	0	323.31
Pg_S1286.6	fructose-2,6-bisphosphatase	AT1G07110.1	Q12471	AT1G07110.1 | Symbols: F2KP, ATF2KP, FKFBP | fructose-2,6-bisphosphatase | chr1:2178363-2183980 REVERSE LENGTH=744	6-phosphofructo-2-kinase 2 OS=Saccharomyces cerevisiae (strain ATCC 204508 / S288c) GN=PFK27 PE=1 SV=1	Mitochondrial;	27.9298	27.9403	27.9376	26.2072	26.067	26.2765	26.6457	27.0905	26.1482	26.151	26.2842	25.9774	17	29.8	84.054	7.452	-0.431034	0	51.969
Pg_S1290.18	serine carboxypeptidase-like 29	AT4G30810.1	Q8S8P0	AT4G30810.1 | Symbols: scpl29 | serine carboxypeptidase-like 29 | chr4:15003474-15006017 FORWARD LENGTH=479	Putative serine carboxypeptidase-like 52 OS=Arabidopsis thaliana GN=SCPL52 PE=5 SV=1	Extracellular; Lysosomal;	27.9249	28.1241	28.1704	26.4245	26.2176	26.446	26.1708	26.6769	26.6747	26.2231	25.966	25.7155	2	23.9	55.795	6.055	-0.331781	0	24.375
Pg_S6030.5	aldehyde dehydrogenase 12A1	AT5G62530.1	Q40255	AT5G62530.1 | Symbols: ALDH12A1, ATP5CDH, P5CDH | aldehyde dehydrogenase 12A1 | chr5:25099768-25103159 REVERSE LENGTH=556	Probable aldehyde dehydrogenase OS=Linum usitatissimum GN=FIS1 PE=2 SV=1	Cytoplasmic; Mitochondrial;	27.5299	27.287	27.2319	28.3464	28.5372	28.3753	27.3086	27.2444	27.6923	28.6584	28.574	28.5078	14	37.4	61.913	6.449	-0.16444	0	129.22
Pg_S1295.36	Translation initiation factor IF6	AT3G55620.1	A5UL31	AT3G55620.1 | Symbols: emb1624 | Translation initiation factor IF6 | chr3:20634581-20636312 FORWARD LENGTH=245	Translation initiation factor 6 OS=Methanobrevibacter smithii (strain PS / ATCC 35061 / DSM 861) GN=eif6 PE=3 SV=1	Plasmamembrane;	27.2097	26.436	27.3567	28.2422	28.9646	29.1962	27.1106	27.4369	27.0192	26.9476	27.1576	27.164	7	47.6	36.216	6.382	0.126061	0	96.592
Pg_S1302.31	NAD(P)-binding Rossmann-fold superfamily protein	AT1G30620.1	Q31FG4	AT1G30620.1 | Symbols: HSR8, MUR4, UXE1 | NAD(P)-binding Rossmann-fold superfamily protein | chr1:10855496-10857970 FORWARD LENGTH=419	ADP-L-glycero-D-manno-heptose-6-epimerase OS=Thiomicrospira crunogena (strain XCL-2) GN=hldD PE=3 SV=1	Cytoplasmic;	26.9334	26.8868	27.2266	28.0172	28.2687	27.6552	28.3444	28.2192	28.0034	28.0902	28.072	28.0791	4	23.8	36.24	5.357	-0.0439024	0	21.292
Pg_S1507.14	Carbohydrate-binding-like fold	AT3G62360.1	Q5JPE7	AT3G62360.1 | Symbols: | Carbohydrate-binding-like fold | chr3:23073020-23080455 REVERSE LENGTH=1227	Nodal modulator 2 OS=Homo sapiens GN=NOMO2 PE=1 SV=1	Cytoplasmic;	28.4927	27.9813	27.8582	25.9991	24.6889	25.8894	24.8641	25.2515	25.1979	25.6369	25.1814	24.8924	11	14.7	131.42	5.698	-0.146706	0	42.592
Pg_S1304.10	glutamine-tRNA ligase, putative / glutaminyl-tRNA synthetase, putative / GlnRS, putative	AT1G25350.2	A9ISS8	AT1G25350.2 | Symbols: OVA9 | glutamine-tRNA ligase, putative / glutaminyl-tRNA synthetase, putative / GlnRS, putative | chr1:8889280-8894205 REVERSE LENGTH=800	Glutamate--tRNA ligase 2 OS=Bartonella tribocorum (strain CIP 105476 / IBS 506) GN=gltX2 PE=3 SV=1	Cytoplasmic;	26.477	26.582	26.6524	27.2964	27.2058	27.4646	26.6224	26.906	26.4126	27.3016	27.5525	27.391	1	29.9	90.249	6.28	-0.448608	0	35.959
Pg_S1305.17	Insulinase (Peptidase family M16) protein	AT3G02090.2	O31766	AT3G02090.2 | Symbols: MPPBETA | Insulinase (Peptidase family M16) protein | chr3:365624-368534 FORWARD LENGTH=535	Uncharacterized zinc protease YmfH OS=Bacillus subtilis (strain 168) GN=ymfH PE=3 SV=2	Mitochondrial;	28.9882	28.9867	28.8561	28.884	29.0649	28.9732	29.3199	29.1959	29.2202	28.8659	28.859	28.8672	3	60.6	53.89	5.615	-0.3325	0	323.31
Pg_S1307.5	NADH dehydrogenase subunit J	ATCG00420.1	B8HLE8	ATCG00420.1 | Symbols: NDHJ | NADH dehydrogenase subunit J | chrC:48677-49153 REVERSE LENGTH=158	NAD(P)H-quinone oxidoreductase subunit K 2 OS=Cyanothece sp. (strain PCC 7425 / ATCC 29141) GN=ndhK2 PE=3 SV=1	Unknown	24.9827	24.561	25.7896	25.974	25.9612	25.8268	25.3896	25.6055	25.5742	26.042	26.484	26.6148	4	37.3	18.677	6.376	-0.252532	0	24.047
Pg_S1314.10	cyclophilin 38	AT3G01480.1	P82869	AT3G01480.1 | Symbols: CYP38, ATCYP38 | cyclophilin 38 | chr3:188569-190674 FORWARD LENGTH=437	Peptidyl-prolyl cis-trans isomerase CYP37, chloroplastic OS=Arabidopsis thaliana GN=CYP37 PE=1 SV=3	Cytoplasmic; Chloroplast;	27.956	27.4105	27.4521	30.1615	30.2709	30.2241	29.7611	29.7955	29.7789	30.2116	30.2815	30.1901	3	66.6	43.553	4.464	-0.211899	0	323.31
Pg_S1314.13	formate dehydrogenase	AT5G14780.1	P75913	AT5G14780.1 | Symbols: FDH | formate dehydrogenase | chr5:4777043-4779190 FORWARD LENGTH=384	Glyoxylate/hydroxypyruvate reductase A OS=Escherichia coli (strain K12) GN=ghrA PE=1 SV=2	Mitochondrial;	31.4551	31.4774	31.4971	32.218	32.1062	32.0783	29.3053	29.3693	29.1826	32.0123	31.5535	31.98	2	64	42.456	6.891	-0.207254	0	219.64
Pg_S1314.19	carbonic anhydrase 1	AT3G01500.2	P9WPJ8	AT3G01500.2 | Symbols: CA1 | carbonic anhydrase 1 | chr3:194853-197873 REVERSE LENGTH=347	Carbonic anhydrase 2 OS=Mycobacterium tuberculosis (strain CDC 1551 / Oshkosh) GN=mtcA2 PE=3 SV=1	Chloroplast;	30.6451	30.6363	30.2607	31.3927	31.1135	31.0441	31.2114	31.1906	31.1406	30.1725	30.0806	30.3868	4	64.8	36.049	6.241	-0.0134328	0	193.47
Pg_S1319.13	AICARFT/IMPCHase bienzyme family protein	AT2G35040.1	B5Z0A3	AT2G35040.1 | Symbols: | AICARFT/IMPCHase bienzyme family protein | chr2:14765347-14768269 REVERSE LENGTH=596	Bifunctional purine biosynthesis protein PurH OS=Escherichia coli O157:H7 (strain EC4115 / EHEC) GN=purH PE=3 SV=1	Cytoplasmic; Chloroplast;	25.5262	25.4799	25.806	25.9182	25.8456	25.7625	25.5605	25.2886	25.5287	25.4709	25.1786	25.4303	2	17	78.368	5.907	-0.216152	0	28.342
Pg_S1333.10	Pyridoxal phosphate (PLP)-dependent transferases superfamily protein	AT1G43710.1	Q9CG20	AT1G43710.1 | Symbols: emb1075 | Pyridoxal phosphate (PLP)-dependent transferases superfamily protein | chr1:16486534-16488298 REVERSE LENGTH=482	Glutamate decarboxylase OS=Lactococcus lactis subsp. lactis (strain IL1403) GN=gadB PE=1 SV=1	Mitochondrial;	27.6219	27.5027	27.2815	28.8294	29.0585	28.9663	27.7419	27.6432	27.8389	28.977	28.9	28.6366	13	42.1	46.305	8.007	-0.200721	0	102.12
Pg_S1335.13	glyceraldehyde-3-phosphate dehydrogenase C subunit 1	AT3G04120.1	P99136	AT3G04120.1 | Symbols: GAPC, GAPC-1, GAPC1 | glyceraldehyde-3-phosphate dehydrogenase C subunit 1 | chr3:1081077-1083131 FORWARD LENGTH=338	Glyceraldehyde-3-phosphate dehydrogenase 1 OS=Staphylococcus aureus (strain N315) GN=gapA1 PE=1 SV=1	Cytoplasmic;	28.611	28.5295	28.6832	28.8064	28.464	28.7788	29.6114	29.6615	29.7477	28.6767	28.3037	28.5014	2	66.2	39.831	8.227	0.0247253	0	140.09
Pg_S1335.20	Zn-dependent exopeptidases superfamily protein	AT5G60160.1	Q9WYJ9	AT5G60160.1 | Symbols: | Zn-dependent exopeptidases superfamily protein | chr5:24223887-24226783 REVERSE LENGTH=477	Probable M18 family aminopeptidase 1 OS=Thermotoga maritima (strain ATCC 43589 / MSB8 / DSM 3109 / JCM 10099) GN=apeA PE=1 SV=2	Cytoplasmic; Mitochondrial;	27.4118	27.5398	27.7653	27.5702	27.8301	27.88	27.2768	27.5674	27.1973	27.2258	27.4074	27.4762	2	36.9	52.405	6.236	-0.245702	0	108.88
Pg_S3431.1	Ribosomal protein L22p/L17e family protein	AT1G27400.1	B1XSQ6	AT1G27400.1 | Symbols: | Ribosomal protein L22p/L17e family protein | chr1:9515230-9516725 FORWARD LENGTH=176	50S ribosomal protein L22 OS=Polynucleobacter necessarius subsp. necessarius (strain STIR1) GN=rplV PE=3 SV=1	Nuclear;	27.9719	27.9244	27.9397	26.5191	26.325	26.4115	28.0523	27.8444	27.6906	29.3301	28.8368	29.1646	2	31.2	21.826	10.41	-0.759896	0	10.756
Pg_S1335.38	haloacid dehalogenase-like hydrolase family protein	AT5G53850.2	C5M5Z6	AT5G53850.2 | Symbols: | haloacid dehalogenase-like hydrolase family protein | chr5:21861155-21864817 REVERSE LENGTH=507	Enolase-phosphatase E1 OS=Candida tropicalis (strain ATCC MYA-3404 / T1) GN=UTR4 PE=3 SV=1	Chloroplast;	29.868	29.3546	28.925	27.3383	27.263	27.1159	26.0365	26.0749	25.8757	27.2022	27.1551	27.0758	21	28.5	117.97	5.107	-0.20212	0	104.73
Pg_S1338.22	Rhodanese/Cell cycle control phosphatase superfamily protein	AT1G17850.2	Q1QPC1	AT1G17850.2 | Symbols: | Rhodanese/Cell cycle control phosphatase superfamily protein | chr1:6146470-6148820 REVERSE LENGTH=448	UPF0176 protein Nham_1078 OS=Nitrobacter hamburgensis (strain X14 / DSM 10229) GN=Nham_1078 PE=3 SV=1	Plasmamembrane; Mitochondrial; Chloroplast	25.4119	25.5391	25.3723	25.9495	25.8856	26.1087	26.6266	26.8522	26.9519	26.4445	25.8146	26.7671	2	23.3	40.847	8.891	0.0445026	0	24.181
Pg_S1345.17	dehydroascorbate reductase 1	unknown	unknown	unknown	unknown	Cytoplasmic;	25.9095	25.886	26.1192	27.5825	27.7691	27.3937	25.5522	25.5215	25.4433	29.3606	29.0386	28.7621	4	48.5	25.651	5.983	-0.1869	0	23.363
Pg_S2428.20	high mobility group A	AT1G14900.1	-	AT1G14900.1 | Symbols: HMGA | high mobility group A | chr1:5138665-5139353 REVERSE LENGTH=204	-	Nuclear;	26.3382	26.6067	26.7806	25.9643	26.1128	26.2726	29.8195	29.8106	29.6584	27.3247	27.0394	27.0358	6	54.1	18.877	10.367	-1.09128	0	145.01
Pg_S1345.3	Lactate/malate dehydrogenase family protein	AT1G53240.1	B3EEE5	AT1G53240.1 | Symbols: mMDH1 | Lactate/malate dehydrogenase family protein | chr1:19854966-19856802 REVERSE LENGTH=341	Malate dehydrogenase OS=Chlorobium limicola (strain DSM 245 / NBRC 103803) GN=mdh PE=3 SV=1	Cytoplasmic;	30.8082	30.7433	30.6394	31.8725	32.1156	32.0618	32.1968	32.0618	32.0639	31.7256	31.7499	31.7695	1	57	35.144	6.405	0.0612805	0	323.31
Pg_S1347.19	alpha/beta-Hydrolases superfamily protein	AT4G16820.1	Q9P979	AT4G16820.1 | Symbols: PLA-I{beta]2 | alpha/beta-Hydrolases superfamily protein | chr4:9467563-9469116 FORWARD LENGTH=517	Feruloyl esterase A OS=Aspergillus awamori GN=faeA PE=1 SV=3	Cytoplasmic;	26.7227	26.8869	26.3527	28.7102	28.5093	28.5131	27.7957	27.6359	27.8065	28.6899	28.5763	28.7834	5	61.7	36.585	5.517	-0.173148	0	69.582
Pg_S1348.15	Uroporphyrinogen decarboxylase	AT3G14930.1	Q1CN66	AT3G14930.1 | Symbols: HEME1 | Uroporphyrinogen decarboxylase | chr3:5020675-5022577 FORWARD LENGTH=418	Uroporphyrinogen decarboxylase OS=Yersinia pestis bv. Antiqua (strain Nepal516) GN=hemE PE=3 SV=1	Chloroplast;	27.4186	26.4151	26.9126	28.6539	28.7487	28.9031	29.9658	29.8678	29.8424	28.3308	28.4907	28.1698	3	55.3	43.503	6.363	0.00812183	0	323.31
Pg_S1348.26	translocon at the inner envelope membrane of chloroplasts 110	AT1G06950.1	O24303	AT1G06950.1 | Symbols: ATTIC110, TIC110 | translocon at the inner envelope membrane of chloroplasts 110 | chr1:2130303-2135563 REVERSE LENGTH=1016	Protein TIC110, chloroplastic OS=Pisum sativum GN=TIC110 PE=1 SV=1	Cytoplasmic; Nuclear;	25.5343	25.3379	25.9016	26.4282	26.7686	26.8964	27.1242	27.3062	27.3442	26.3902	26.0224	26.7515	3	34.2	93.822	5.2	-0.32617	0	33.249
Pg_S1352.21	RNA-binding KH domain-containing protein	AT3G04610.1	Q5RB68	AT3G04610.1 | Symbols: FLK | RNA-binding KH domain-containing protein | chr3:1250762-1254272 REVERSE LENGTH=577	Insulin-like growth factor 2 mRNA-binding protein 2 OS=Pongo abelii GN=IGF2BP2 PE=2 SV=1	Nuclear;	26.5999	26.8405	26.9682	24.8944	25.0127	25.0793	24.8424	24.8688	24.9015	25.1051	24.7257	25.4788	7	34.3	50.77	5.153	-0.374526	0	16.61
Pg_S1355.1	LOCATED IN: chloroplast; EXPRESSED IN: 17 plant structures; EXPRESSED DURING: 9 growth stages; CONTAINS InterPro DOMAIN/s: Barren (InterPro:IPR008418); Has 467 Blast hits to 447 proteins in 202 species: Archae - 0; Bacteria - 4; Metazoa - 14	unknown	unknown	unknown	unknown	Cytoplasmic; Nuclear;	29.1698	29.3947	29.1975	30.6225	30.633	30.6211	26.9526	27.0782	26.7819	29.9496	30.05	30.0965	13	13.2	108.3	4.79	-0.500622	0	178.34
Pg_S1357.4	outer envelope protein of 80 kDa	AT5G19620.1	Q5IZC8	AT5G19620.1 | Symbols: EMB213, OEP80, ATOEP80, TOC75 | outer envelope protein of 80 kDa | chr5:6623323-6627641 FORWARD LENGTH=732	Protein TOC75-4, chloroplastic OS=Arabidopsis thaliana GN=TOC75-4 PE=2 SV=1	Chloroplast; Nuclear;	27.439	27.687	28.2944	25.4786	25.2376	25.2825	24.9803	25.4527	25.154	25.5911	25.7817	25.6051	10	19.7	71.38	8.416	-0.29314	0	20.548
Pg_S1370.10	Glutamyl/glutaminyl-tRNA synthetase, class Ic	AT5G26710.1	Q728Q1	AT5G26710.1 | Symbols: | Glutamyl/glutaminyl-tRNA synthetase, class Ic | chr5:9305673-9308247 FORWARD LENGTH=719	Glutamate--tRNA ligase OS=Desulfovibrio vulgaris (strain Hildenborough / ATCC 29579 / NCIMB 8303) GN=gltX PE=3 SV=1	Cytoplasmic;	25.8306	26.347	26.3177	26.5657	26.2085	26.5031	26.1907	26.4494	25.1664	26.6259	26.6999	26.2713	1	25	82.961	7.422	-0.399454	0	23.763
Pg_S1378.3	heat shock protein 90.1	AT5G52640.1	P58480	AT5G52640.1 | Symbols: HSP81-1, ATHS83, HSP81.1, HSP83, ATHSP90.1, AtHsp90-1, HSP90.1 | heat shock protein 90.1 | chr5:21352542-21355147 FORWARD LENGTH=705	Chaperone protein HtpG OS=Salmonella typhimurium (strain LT2 / SGSC1412 / ATCC 700720) GN=htpG PE=3 SV=1	Cytoplasmic;	29.3708	29.4341	29.313	31.0483	31.1957	31.1841	28.2752	27.874	27.5898	30.956	30.8858	31.1049	3	40.2	80.347	4.771	-0.607582	0	201.28
Pg_S1386.1	DHFS-FPGS homolog B	AT5G05980.1	P57265	AT5G05980.1 | Symbols: ATDFB, DFB, FPGS1 | DHFS-FPGS homolog B | chr5:1799738-1804441 REVERSE LENGTH=571	Bifunctional protein FolC OS=Buchnera aphidicola subsp. Acyrthosiphon pisum (strain APS) GN=folC PE=3 SV=1	Cytoplasmic;	27.3953	28.0421	28.0505	27.922	27.6474	27.8469	28.1775	28.1264	28.113	27.7087	28.429	27.6974	4	36.2	58.089	5.555	-0.101916	0	68.92
Pg_S1389.15	succinate dehydrogenase 1-1	AT5G66760.1	O13755	AT5G66760.1 | Symbols: SDH1-1 | succinate dehydrogenase 1-1 | chr5:26653776-26657224 FORWARD LENGTH=634	Fumarate reductase OS=Schizosaccharomyces pombe (strain 972 / ATCC 24843) GN=osm1 PE=3 SV=1	Mitochondrial;	29.7287	29.8661	29.7498	28.7264	28.6152	28.5267	28.3748	28.337	28.3759	28.3047	28.679	28.6018	4	38.4	69.514	6.397	-0.324684	0	185.79
Pg_S1395.25	Clathrin light chain protein	AT2G20760.1	Q6Z3A8	AT2G20760.1 | Symbols: | Clathrin light chain protein | chr2:8943279-8945108 REVERSE LENGTH=338	Clathrin light chain 3 OS=Oryza sativa subsp. japonica GN=Os07g0461500 PE=3 SV=1	Nuclear;	27.6328	27.591	27.3568	25.3275	24.4524	24.6409	27.5621	27.3985	27.3404	24.5275	24.2716	24.4144	2	18.6	36.103	5.31	-0.998171	0	9.268
Pg_S3818.12	DNA-directed RNA polymerase family protein	ATCG00180.1	O25806	ATCG00180.1 | Symbols: RPOC1 | DNA-directed RNA polymerase family protein | chrC:20251-23084 REVERSE LENGTH=680	Bifunctional DNA-directed RNA polymerase subunit beta-beta' OS=Helicobacter pylori (strain ATCC 700392 / 26695) GN=rpoBC PE=1 SV=1	Nuclear;	25.3579	25.1508	24.6283	22.7639	23.1634	23.5173	23.6831	23.6639	23.7516	23.5268	22.2366	23.3203	5	6.2	135.03	7.455	-0.431092	0	11.502
Pg_S1407.21	homolog of bacterial cytokinesis Z-ring protein FTSZ 1-1	AT5G55280.1	P72079	AT5G55280.1 | Symbols: FTSZ1-1, ATFTSZ1-1, CPFTSZ | homolog of bacterial cytokinesis Z-ring protein FTSZ 1-1 | chr5:22420740-22422527 REVERSE LENGTH=433	Cell division protein FtsZ OS=Neisseria gonorrhoeae GN=ftsZ PE=3 SV=1	Chloroplast;	23.3243	24.7728	24.4949	24.9639	25.7337	25.3758	28.418	28.2691	28.3973	24.9562	23.2785	25.347	11	53.6	44.322	6.184	0.0149289	0	103.69
Pg_S1407.28	PLC-like phosphodiesterase family protein	AT4G26690.1	P54527	AT4G26690.1 | Symbols: SHV3, MRH5, GPDL2 | PLC-like phosphodiesterase family protein | chr4:13456793-13459890 REVERSE LENGTH=759	Uncharacterized protein YqiK OS=Bacillus subtilis (strain 168) GN=yqiK PE=4 SV=2	Plasmamembrane;	29.5563	29.2911	29.4303	29.335	29.0084	29.0858	28.3232	28.2953	28.1194	27.4121	27.4843	27.4686	3	21.7	81.448	4.525	0.0666667	0	180.26
Pg_S2790.6	Ribosomal protein S8e family protein	AT5G59240.1	P25204	AT5G59240.1 | Symbols: | Ribosomal protein S8e family protein | chr5:23902626-23903670 REVERSE LENGTH=210	40S ribosomal protein S8 OS=Leishmania major GN=RPS8A PE=3 SV=1	Nuclear;	27.6084	27.4845	27.7069	28.5764	28.4733	28.4806	29.9806	29.8982	29.8697	28.4359	28.623	28.7661	2	28.2	39.137	11.073	-0.978779	0	98.227
Pg_S1410.1	allene oxide cyclase 4	unknown	unknown	unknown	unknown	Chloroplast;	28.0845	28.2123	28.0128	28.6596	28.737	28.8597	28.4029	28.3853	28.2332	28.3064	28.3157	28.315	4	40.7	26.485	8.471	-0.0177419	0	51.8
Pg_S1410.20	dolichyl-diphosphooligosaccharide-protein glycosyltransferase 48kDa subunit family protein	AT5G66680.1	P33767	AT5G66680.1 | Symbols: DGL1 | dolichyl-diphosphooligosaccharide-protein glycosyltransferase 48kDa subunit family protein | chr5:26617840-26620581 REVERSE LENGTH=437	Dolichyl-diphosphooligosaccharide--protein glycosyltransferase subunit WBP1 OS=Saccharomyces cerevisiae (strain ATCC 204508 / S288c) GN=WBP1 PE=1 SV=1	Plasmamembrane;	26.3961	26.0299	26.103	27.4113	27.3535	27.299	27.5475	27.5685	27.3135	27.6499	27.8429	27.7286	5	30.2	48.871	5.974	-0.00640732	0	45.709
Pg_S1416.27	Class I glutamine amidotransferase-like superfamily protein	AT1G53280.1	-	AT1G53280.1 | Symbols: | Class I glutamine amidotransferase-like superfamily protein | chr1:19864942-19867341 REVERSE LENGTH=438	-	Cytoplasmic; Chloroplast;	27.863	27.4074	27.8895	29.292	29.0015	28.9547	27.6153	27.5092	28.0782	29.6022	29.7069	29.5918	4	33	46.76	7.533	0.0862385	0	80.457
Pg_S1417.11	Translation elongation factor EF1B, gamma chain	AT1G09640.1	Q9VG96	AT1G09640.1 | Symbols: | Translation elongation factor EF1B, gamma chain | chr1:3120162-3122152 FORWARD LENGTH=414	Glutathione S-transferase D4 OS=Drosophila melanogaster GN=GstD4 PE=1 SV=1	Cytoplasmic;	25.5656	25.7088	25.7404	26.8615	26.9493	27.2475	26.7997	26.8045	27.1109	26.9683	26.7492	26.4208	2	40.2	48.069	5.635	-0.361229	0	14.278
Pg_S1417.4	proteasome activating protein 200	AT3G13330.1	F1R2X6	AT3G13330.1 | Symbols: PA200 | proteasome activating protein 200 | chr3:4319804-4330061 REVERSE LENGTH=1816	Proteasome activator complex subunit 4B OS=Danio rerio GN=psme4b PE=3 SV=2	Plasmamembrane;	26.5431	26.8358	27.2737	26.6317	26.3766	26.1261	26.011	25.805	25.3551	26.4304	26.3049	26.3963	3	10.2	202.16	7.035	-0.111596	0	51.688
Pg_S1418.12	Peptidase M1 family protein	AT1G63770.5	Q2GY21	AT1G63770.5 | Symbols: | Peptidase M1 family protein | chr1:23657791-23664243 REVERSE LENGTH=1013	Leukotriene A-4 hydrolase homolog OS=Chaetomium globosum (strain ATCC 6205 / CBS 148.51 / DSM 1962 / NBRC 6347 / NRRL 1970) GN=CHGG_07133 PE=3 SV=1	Cytoplasmic;	27.6964	28.1174	28.4791	27.0046	27.3612	27.2584	27.4771	27.8075	27.6777	27.8482	27.9454	27.8277	6	79.8	72.68	5.724	-0.272994	0	92.093
Pg_S1419.6	Cytosol aminopeptidase family protein	AT4G30920.1	Q41382	AT4G30920.1 | Symbols: | Cytosol aminopeptidase family protein | chr4:15046589-15049304 REVERSE LENGTH=583	DEAD-box ATP-dependent RNA helicase 7 OS=Spinacia oleracea GN=RH7 PE=2 SV=1	Cytoplasmic; Chloroplast;	28.7031	28.8578	28.8416	29.2181	29.2313	29.2885	28.918	28.9517	29.0574	29.3085	29.3904	29.2427	6	74.7	54.692	5.508	0.101143	0	162.76
Pg_S1421.2	Phosphoribosyltransferase family protein	AT2G44530.1	Q9XGA1	AT2G44530.1 | Symbols: | Phosphoribosyltransferase family protein | chr2:18383732-18385974 FORWARD LENGTH=394	Ribose-phosphate pyrophosphokinase 4 OS=Spinacia oleracea GN=PRS4 PE=2 SV=1	Plasmamembrane; Cytoplasmic;	26.4988	26.2554	26.4814	28.0162	27.789	27.92	26.1267	26.4606	26.1506	27.4268	27.3909	27.9078	5	42.3	35.577	6.292	0.0567398	0	60.337
Pg_S1430.1	GHMP kinase family protein	AT1G31910.1	Q9UT88	AT1G31910.1 | Symbols: | GHMP kinase family protein | chr1:11459050-11461649 FORWARD LENGTH=505	Probable phosphomevalonate kinase OS=Schizosaccharomyces pombe (strain 972 / ATCC 24843) GN=erg8 PE=3 SV=1	Plasmamembrane;	26.4226	26.0772	25.938	26.175	26.2566	26.4172	26.6206	26.7144	26.5828	26.2149	26.2576	26.333	11	29.8	46.618	6.727	-0.220714	0	45.851
Pg_S1437.6	elongation factor Ts family protein	AT4G29060.1	A0Q4H2	AT4G29060.1 | Symbols: emb2726 | elongation factor Ts family protein | chr4:14317744-14321315 FORWARD LENGTH=953	Elongation factor Ts OS=Francisella tularensis subsp. novicida (strain U112) GN=tsf PE=3 SV=1	Cytoplasmic; Nuclear;	30.8009	30.7498	30.8192	29.6413	29.617	29.6102	30.4111	30.477	30.4296	29.687	29.6886	29.6095	18	34	113.64	4.814	-0.473077	0	323.31
Pg_S1439.10	Aldolase-type TIM barrel family protein	AT5G13420.1	Q255E4	AT5G13420.1 | Symbols: | Aldolase-type TIM barrel family protein | chr5:4302080-4304212 REVERSE LENGTH=438	Transaldolase OS=Chlamydophila felis (strain Fe/C-56) GN=tal PE=3 SV=1	Cytoplasmic; Mitochondrial; Chloroplast	27.7976	27.6844	27.7998	28.7453	28.5561	28.6898	28.1288	28.0909	27.9928	28.6209	28.7057	28.6324	3	44.5	32.894	6.127	0.105844	0	86.308
Pg_S7588.5	acyl-CoA oxidase 4	AT3G51840.1	Q80XL6	AT3G51840.1 | Symbols: ACX4, ATSCX, ATG6 | acyl-CoA oxidase 4 | chr3:19225653-19229008 REVERSE LENGTH=436	Acyl-CoA dehydrogenase family member 11 OS=Mus musculus GN=Acad11 PE=1 SV=2	Plasmamembrane; Chloroplast;	25.6731	25.4823	25.5788	27.1121	27.1858	27.1737	25.1055	25.0877	25.0483	27.3111	27.1839	27.275	7	22.8	48.026	7.382	0.033713	0	10.002
Pg_S1439.22	CAX-interacting protein 2	AT2G38270.1	Q2R075	AT2G38270.1 | Symbols: CXIP2, ATGRX2 | CAX-interacting protein 2 | chr2:16031347-16033054 REVERSE LENGTH=293	Putative glutaredoxin-C11 OS=Oryza sativa subsp. japonica GN=GRXC11 PE=3 SV=1	Chloroplast;	26.2506	26.5938	26.8721	26.9071	26.5223	26.7766	27.2746	27.2003	27.2919	26.626	26.9563	26.9732	7	40	29.65	5.727	-0.230741	0	64.567
Pg_S1450.21	plastid transcriptionally active 17	AT1G80480.1	P33030	AT1G80480.1 | Symbols: PTAC17 | plastid transcriptionally active 17 | chr1:30258272-30260570 REVERSE LENGTH=444	Uncharacterized protein YeiR OS=Escherichia coli (strain K12) GN=yeiR PE=3 SV=2	Cytoplasmic; Mitochondrial;	29.1963	29.1307	29.0933	29.7785	29.7261	29.568	29.3743	29.4376	29.4601	29.7918	29.9163	29.7281	15	43.4	50.765	5.876	-0.384581	0	233.44
Pg_S6920.1	isopropylmalate dehydrogenase 2	AT1G80560.1	Q8NKB8	AT1G80560.1 | Symbols: ATIMD2, IMD2 | isopropylmalate dehydrogenase 2 | chr1:30287833-30290126 FORWARD LENGTH=405	3-isopropylmalate dehydrogenase OS=Blastobotrys adeninivorans GN=LEU2 PE=3 SV=1	Cytoplasmic; Chloroplast;	27.6464	27.4654	28.0311	29.0466	29.1181	29.2808	29.0812	29.0566	29.1304	29.1096	29.0385	29.2038	14	52	43.109	5.197	-0.0452736	0	310.78
Pg_S5625.4	HSP20-like chaperones superfamily protein	AT5G02480.1	-	AT5G02480.1 | Symbols: | HSP20-like chaperones superfamily protein | chr5:548152-549678 FORWARD LENGTH=508	-	Cytoplasmic; ER; Nuclear	27.4573	27.3995	27.9327	25.4469	25.2369	25.126	26.4537	26.5471	26.521	25.9115	25.6615	25.7883	4	27.7	20.992	4.213	-0.807979	0	25.328
Pg_S1468.16	UDP-glucosyl transferase 84B1	AT2G23260.1	Q83140	AT2G23260.1 | Symbols: UGT84B1 | UDP-glucosyl transferase 84B1 | chr2:9900046-9901416 REVERSE LENGTH=456	Ecdysteroid UDP-glucosyltransferase OS=Mamestra brassicae nuclear polyhedrosis virus GN=EGT PE=3 SV=1	Cytoplasmic;	26.0192	26.4654	25.5931	27.6553	27.8056	27.7011	26.5561	26.1504	26.2526	27.0568	27.4155	27.547	7	27.2	50.174	5.402	-0.0712695	0	49.995
Pg_S1468.23	Octicosapeptide/Phox/Bem1p family protein	AT5G64430.1	-	AT5G64430.1 | Symbols: | Octicosapeptide/Phox/Bem1p family protein | chr5:25762540-25764081 REVERSE LENGTH=513	-	Nuclear;	27.9615	27.9496	27.9536	25.8457	26.2954	26.1329	26.7686	26.7574	25.6978	25.9791	26.0956	26.0222	6	37.7	49.006	5.277	-0.643379	0	52.507
Pg_S1475.2	D-aminoacid aminotransferase-like PLP-dependent enzymes superfamily protein	AT5G27410.1	Q8W0Z7	AT5G27410.1 | Symbols: | D-aminoacid aminotransferase-like PLP-dependent enzymes superfamily protein | chr5:9678821-9682468 FORWARD LENGTH=559	Branched-chain-amino-acid aminotransferase-like protein 1 OS=Arabidopsis thaliana GN=At3g05190 PE=2 SV=1	Mitochondrial; Chloroplast;	25.5293	27.1447	26.2998	27.1717	27.3109	27.2392	26.2304	26.881	26.3192	27.4521	27.6146	27.3977	9	31.5	44.17	7.588	-0.09	0	39.664
Pg_S1481.2	ribulose-bisphosphate carboxylases	ATCG00490.1	Q33438	ATCG00490.1 | Symbols: RBCL | ribulose-bisphosphate carboxylases | chrC:54958-56397 FORWARD LENGTH=479	Ribulose bisphosphate carboxylase large chain (Fragment) OS=Erythrina crista-galli GN=rbcL PE=3 SV=1	Mitochondrial;	33.0632	33.2321	33.8746	34.5576	34.311	34.5857	33.1479	33.2924	33.0689	32.9728	33.2236	33.2531	3	51	26.83	8.416	-0.293724	0	239.83
Pg_S1497.17	ribulose bisphosphate carboxylase small chain 1A	AT1G67090.1	O98946	AT1G67090.1 | Symbols: RBCS1A | ribulose bisphosphate carboxylase small chain 1A | chr1:25048465-25049249 REVERSE LENGTH=180	Ribulose bisphosphate carboxylase small chain OS=Detonula confervacea GN=rbcS PE=3 SV=1	Chloroplast;	33.6844	33.295	33.3652	35.2001	35.4235	34.87	32.8756	32.8617	33.026	34.4609	34.2186	34.8774	5	72.4	20.332	7.663	-0.155801	0	260.46
Pg_S1497.24	Rad23 UV excision repair protein family	AT5G38470.1	P14794	AT5G38470.1 | Symbols: RAD23D | Rad23 UV excision repair protein family | chr5:15404720-15407500 FORWARD LENGTH=378	Ubiquitin-60S ribosomal protein L40 OS=Dictyostelium discoideum GN=ubqB PE=1 SV=2	Cytoplasmic;	27.3588	27.1637	27.1694	25.3619	25.2475	25.0169	25.8857	25.8153	26.279	25.6317	24.9955	25.0841	1	19.3	41.041	4.411	-0.178068	0	15.853
Pg_S4947.5	MAP kinase kinase 2	AT4G29810.2	Q5R8Z4	AT4G29810.2 | Symbols: ATMKK2, MKK2, MK1 | MAP kinase kinase 2 | chr4:14593299-14595241 REVERSE LENGTH=372	Serine/threonine-protein kinase PAK 6 OS=Pongo abelii GN=PAK6 PE=2 SV=1	Extracellular; Cytoplasmic;	26.2284	25.9557	25.8983	26.3276	26.5849	26.5869	25.6942	26.0953	25.8908	26.2281	26.3664	26.0857	6	26.6	39.243	5.701	-0.15904	0	33.244
Pg_S1501.29	DNA polymerase V family	AT5G64420.1	-	AT5G64420.1 | Symbols: | DNA polymerase V family | chr5:25756416-25761122 FORWARD LENGTH=1306	-	Cytoplasmic; Nuclear;	30.9389	30.9479	30.6718	30.537	30.4857	30.3562	29.0029	28.849	28.958	30.0948	30.1263	30.1405	12	15.9	189.1	5.999	-0.279755	0	168.96
Pg_S1503.7	neurofilament protein-related	AT3G05900.1	-	AT3G05900.1 | Symbols: | neurofilament protein-related | chr3:1761408-1763854 REVERSE LENGTH=673	-	Cytoplasmic; Nuclear;	27.4167	27.3965	27.3285	27.1406	27.4824	27.4959	27.2422	26.9877	27.0121	28.0961	28.0893	28.1901	3	40.3	68.38	4.115	-0.748336	0	57.781
Pg_S1518.26	Pyridine nucleotide-disulphide oxidoreductase family protein	AT1G74470.1	O26377	AT1G74470.1 | Symbols: | Pyridine nucleotide-disulphide oxidoreductase family protein | chr1:27991248-27992845 FORWARD LENGTH=467	Digeranylgeranylglycerophospholipid reductase 1 OS=Methanothermobacter thermautotrophicus (strain ATCC 29096 / DSM 1053 / JCM 10044 / NBRC 100330 / Delta H) GN=MTH_277 PE=3 SV=1	Cytoplasmic; Mitochondrial;	26.8881	27.1308	26.967	28.2762	28.3614	28.5974	30.2902	30.3133	30.1344	28.3689	28.3892	28.3685	4	49.3	51.367	8.61	-0.232548	0	164.7
Pg_S1518.44	2-oxoglutarate (2OG) and Fe(II)-dependent oxygenase superfamily protein	AT3G12940.1	-	AT3G12940.1 | Symbols: | 2-oxoglutarate (2OG) and Fe(II)-dependent oxygenase superfamily protein | chr3:4130242-4131912 REVERSE LENGTH=474	-	Cytoplasmic;	28.7975	29.2861	29.0094	28.7921	28.9485	29.0003	27.0795	27.2229	26.9206	28.9012	28.9087	28.8091	2	40.9	36.977	6.021	-0.362727	0	37.69
Pg_S1529.5	uracil phosphoribosyltransferase	AT3G53900.2	Q9M336	AT3G53900.2 | Symbols: UPP, PYRR | uracil phosphoribosyltransferase | chr3:19956914-19959006 REVERSE LENGTH=296	Uracil phosphoribosyltransferase, chloroplastic OS=Arabidopsis thaliana GN=UPP PE=1 SV=1	Mitochondrial; Chloroplast;	27.9498	27.8251	27.8042	27.5886	27.6676	27.8136	26.9629	26.8224	26.8192	27.4666	27.4101	27.1788	1	50.3	31.956	8.895	-0.116207	0	50.504
Pg_S1541.5	O-acetylserine (thiol) lyase (OAS-TL) isoform A1	AT4G14880.1	Q2YUU0	AT4G14880.1 | Symbols: OASA1, OLD3, CYTACS1 | O-acetylserine (thiol) lyase (OAS-TL) isoform A1 | chr4:8518209-8520050 REVERSE LENGTH=322	Probable siderophore biosynthesis protein SbnA OS=Staphylococcus aureus (strain bovine RF122 / ET3-1) GN=sbnA PE=3 SV=1	Cytoplasmic; Chloroplast;	29.5651	29.7783	29.6348	31.1927	31.1734	31.3175	29.2775	29.3017	29.3238	31.1399	31.0811	31.009	4	45.6	52.445	5.693	-0.119756	0	176.82
Pg_S1555.4	Photosystem I, PsaA/PsaB protein	ATCG00340.1	Q6B8U7	ATCG00340.1 | Symbols: PSAB | Photosystem I, PsaA/PsaB protein | chrC:37375-39579 REVERSE LENGTH=734	Photosystem I P700 chlorophyll a apoprotein A2 OS=Gracilaria tenuistipitata var. liui GN=psaB PE=3 SV=1	Plasmamembrane;	32.0211	32.2092	32.2735	32.4292	32.4183	32.5135	34.0108	33.9725	33.8553	32.4485	32.3663	32.3633	13	32.9	83.086	6.701	0.2484	0	323.31
Pg_S1560.7	mitochondrial lipoamide dehydrogenase 1	AT1G48030.1	P80647	AT1G48030.1 | Symbols: mtLPD1 | mitochondrial lipoamide dehydrogenase 1 | chr1:17717432-17719141 REVERSE LENGTH=507	Dihydrolipoyl dehydrogenase (Fragment) OS=Hymenolepis diminuta PE=1 SV=1	Mitochondrial;	30.268	30.2215	30.1179	29.1314	29.058	29.2462	27.2744	27.154	27.4477	29.047	29.0382	29.0571	5	57.6	54.37	6.938	-0.0015625	0	193.29
Pg_S1566.17	E1 C-terminal related 1	AT5G19180.1	Q9NAN1	AT5G19180.1 | Symbols: ECR1 | E1 C-terminal related 1 | chr5:6453375-6455750 FORWARD LENGTH=454	SUMO-activating enzyme subunit uba-2 OS=Caenorhabditis elegans GN=uba-2 PE=3 SV=3	Cytoplasmic; Nuclear;	28.0754	27.968	27.7622	27.7703	27.495	27.7058	27.197	27.1917	27.0906	28.7081	28.3621	28.691	8	21	76.16	7.172	-0.1925	0	31.558
Pg_S1569.2	ATP binding;leucine-tRNA ligases;aminoacyl-tRNA ligases;nucleotide binding;ATP binding;aminoacyl-tRNA ligases	AT1G09620.1	A5IKQ3	AT1G09620.1 | Symbols: | ATP binding;leucine-tRNA ligases;aminoacyl-tRNA ligases;nucleotide binding;ATP binding;aminoacyl-tRNA ligases | chr1:3113077-3116455 REVERSE LENGTH=1091	Leucine--tRNA ligase OS=Thermotoga petrophila (strain RKU-1 / ATCC BAA-488 / DSM 13995) GN=leuS PE=3 SV=1	Cytoplasmic; Mitochondrial;	27.6881	27.6943	27.6362	27.0171	27.2831	27.3709	27.741	27.8454	27.6108	26.8809	27.2794	26.9222	1	44.7	48.336	6.973	-0.420567	0	143.74
Pg_S1583.19	Class II aaRS and biotin synthetases superfamily protein	AT5G52520.1	Q3A6R6	AT5G52520.1 | Symbols: OVA6, PRORS1 | Class II aaRS and biotin synthetases superfamily protein | chr5:21311112-21313875 FORWARD LENGTH=543	Proline--tRNA ligase OS=Pelobacter carbinolicus (strain DSM 2380 / Gra Bd 1) GN=proS PE=3 SV=1	Cytoplasmic;	28.6388	28.3718	28.5551	28.1461	28.1299	28.3003	28.3812	28.4092	28.4529	28.0996	27.9287	27.9394	23	52.4	58.332	6.652	-0.497451	0	98.299
Pg_S1590.18	phosphoenolpyruvate carboxylase 1	AT1G53310.1	Q72L05	AT1G53310.1 | Symbols: ATPPC1, PEPC1, ATPEPC1, PPC1 | phosphoenolpyruvate carboxylase 1 | chr1:19884261-19888070 REVERSE LENGTH=967	Phosphoenolpyruvate carboxylase OS=Thermus thermophilus (strain HB27 / ATCC BAA-163 / DSM 7039) GN=ppc PE=3 SV=1	Cytoplasmic;	27.8657	27.8439	27.628	29.1475	29.2281	29.2167	27.2934	27.1363	26.9877	29.355	29.0935	29.2339	3	45.2	110.27	5.637	-0.362836	0	80.843
Pg_S1590.5	ribosomal protein large subunit 16A	AT2G42740.1	Q3J8S6	AT2G42740.1 | Symbols: RPL16A | ribosomal protein large subunit 16A | chr2:17791794-17792946 FORWARD LENGTH=182	50S ribosomal protein L5 OS=Nitrosococcus oceani (strain ATCC 19707 / NCIMB 11848) GN=rplE PE=3 SV=1	Mitochondrial;	27.3203	27.1053	26.6649	28.2033	27.6725	28.2864	29.6836	29.6473	29.5549	28.064	27.3567	26.0829	2	30.2	25.257	10.169	-0.387838	0	110.69
Pg_S1590.6	aspartate aminotransferase 1	AT2G30970.1	Q01802	AT2G30970.1 | Symbols: ASP1 | aspartate aminotransferase 1 | chr2:13179012-13181686 FORWARD LENGTH=430	Aspartate aminotransferase, mitochondrial OS=Saccharomyces cerevisiae (strain ATCC 204508 / S288c) GN=AAT1 PE=1 SV=2	Cytoplasmic; Mitochondrial;	26.6003	26.9708	26.6671	27.5204	27.5886	27.4118	25.9846	26.002	25.7581	26.7392	26.8611	26.7035	6	26.4	47.367	6.464	-0.344104	0	18.2
Pg_S1599.6	ACT domain-containing protein	AT2G39570.1	-	AT2G39570.1 | Symbols: | ACT domain-containing protein | chr2:16507963-16509741 FORWARD LENGTH=411	-	Cytoplasmic; Nuclear;	26.0946	26.463	26.2009	28.3426	28.0481	28.2189	26.345	26.1615	26.6565	28.3966	28.1723	28.5032	8	38.8	26.694	4.513	-0.105	0	36.039
Pg_S1606.15	S-adenosyl-L-methionine-dependent methyltransferases superfamily protein	AT1G73600.2	Q6ZIK0	AT1G73600.2 | Symbols: | S-adenosyl-L-methionine-dependent methyltransferases superfamily protein | chr1:27669224-27673400 FORWARD LENGTH=504	Probable tocopherol O-methyltransferase, chloroplastic OS=Oryza sativa subsp. japonica GN=VTE4 PE=2 SV=1	Cytoplasmic;	25.6676	25.9878	26.0094	26.6728	26.7884	26.6542	26.9442	26.9905	27.1311	26.627	26.6893	26.6199	2	20	43.748	4.47	-0.307532	0	57.129
Pg_S1606.25	MIRO-related GTP-ase 1	AT5G27540.1	Q9GPS3	AT5G27540.1 | Symbols: MIRO1, emb2473 | MIRO-related GTP-ase 1 | chr5:9722816-9727112 FORWARD LENGTH=648	Rho-related protein racF2 OS=Dictyostelium discoideum GN=racF2 PE=3 SV=1	Cytoplasmic; Chloroplast; Nuclear	27.8989	27.5647	27.4927	27.5277	27.2457	27.3292	27.0555	26.8449	26.8209	27.7407	27.4643	27.5673	9	34.9	71.593	5.546	-0.225	0	95.756
Pg_S6185.8	light-harvesting chlorophyll-protein complex II subunit B1	AT2G34430.1	Q03965	AT2G34430.1 | Symbols: LHB1B1, LHCB1.4 | light-harvesting chlorophyll-protein complex II subunit B1 | chr2:14524818-14525618 FORWARD LENGTH=266	Chlorophyll a-b binding protein L1818, chloroplastic OS=Chlamydomonas moewusii GN=L1818 PE=2 SV=1	Chloroplast;	29.5594	29.9962	30.1948	31.5437	31.4381	31.4774	31.0178	31.1255	31.0601	31.4049	31.3114	31.2714	3	80.3	27.974	4.977	-0.0121212	0	92.659
Pg_S1615.16	glyceraldehyde-3-phosphate dehydrogenase C subunit 1	AT3G04120.1	P99136	AT3G04120.1 | Symbols: GAPC, GAPC-1, GAPC1 | glyceraldehyde-3-phosphate dehydrogenase C subunit 1 | chr3:1081077-1083131 FORWARD LENGTH=338	Glyceraldehyde-3-phosphate dehydrogenase 1 OS=Staphylococcus aureus (strain N315) GN=gapA1 PE=1 SV=1	Cytoplasmic;	33.083	33.1816	33.2689	33.1059	33.2219	33.1741	34.1914	34.158	34.0789	33.1993	33.0361	32.9059	7	60.1	44.405	5.891	0.115403	0	323.31
Pg_S1617.20	Transketolase	AT2G45290.1	A4IQR7	AT2G45290.1 | Symbols: | Transketolase | chr2:18672737-18675589 FORWARD LENGTH=741	1-deoxy-D-xylulose-5-phosphate synthase OS=Geobacillus thermodenitrificans (strain NG80-2) GN=dxs PE=3 SV=1	Cytoplasmic; Chloroplast;	31.3567	31.3969	30.7793	30.0578	30.3613	30.1263	30.7515	30.7339	30.8616	29.8705	29.8137	29.9127	6	70.7	76.53	5.375	-0.203966	0	323.31
Pg_S1619.3	Peroxidase superfamily protein	AT4G33420.1	Q42580	AT4G33420.1 | Symbols: | Peroxidase superfamily protein | chr4:16084856-16086105 FORWARD LENGTH=325	Peroxidase 21 OS=Arabidopsis thaliana GN=PER21 PE=1 SV=1	Extracellular;	28.2756	28.5811	28.3493	26.373	26.6341	26.6518	27.4398	27.382	27.2688	26.4078	26.1225	26.1126	1	49.7	34.193	6.087	-0.204459	0	74.729
Pg_S1713.18	Ribosomal protein S19 family protein	AT5G09510.1	B8E1D7	AT5G09510.1 | Symbols: | Ribosomal protein S19 family protein | chr5:2955698-2956554 REVERSE LENGTH=152	30S ribosomal protein S19 OS=Dictyoglomus turgidum (strain Z-1310 / DSM 6724) GN=rpsS PE=3 SV=1	Mitochondrial; Nuclear;	25.0028	25.175	25.616	25.8138	25.5433	26.1172	27.4752	27.4146	27.2301	25.5767	26.1879	26.367	1	32.8	21.864	10.739	-0.467708	0	32.96
Pg_S1632.28	phosphoribosylformylglycinamidine cyclo-ligase, chloroplast / phosphoribosyl-aminoimidazole synthetase / AIR synthase (PUR5)	AT3G55010.1	A8H5R0	AT3G55010.1 | Symbols: ATPURM, PUR5 | phosphoribosylformylglycinamidine cyclo-ligase, chloroplast / phosphoribosyl-aminoimidazole synthetase / AIR synthase (PUR5) | chr3:20386818-20388549 FORWARD LENGTH=389	Phosphoribosylformylglycinamidine cyclo-ligase OS=Shewanella pealeana (strain ATCC 700345 / ANG-SQ1) GN=purM PE=3 SV=1	Chloroplast;	26.574	26.6429	26.5705	27.0992	27.0694	26.9897	26.6024	26.5756	26.9578	27.128	26.9557	27.1935	4	36.6	42.786	5.093	0.113614	0	27.839
Pg_S1635.9	phosphate transporter 3;1	AT5G14040.1	P23641	AT5G14040.1 | Symbols: PHT3;1 | phosphate transporter 3;1 | chr5:4531059-4532965 REVERSE LENGTH=375	Mitochondrial phosphate carrier protein OS=Saccharomyces cerevisiae (strain ATCC 204508 / S288c) GN=MIR1 PE=1 SV=1	Chloroplast;	26.2999	26.2415	25.775	28.0282	27.9704	28.0477	27.6294	27.5254	27.7157	27.1216	27.0593	26.8713	6	26.3	75.325	5.59	-0.184805	0	71.611
Pg_S7150.1	Translocon-associated protein (TRAP), alpha subunit	AT2G16595.1	P53815	AT2G16595.1 | Symbols: | Translocon-associated protein (TRAP), alpha subunit | chr2:7198363-7200086 FORWARD LENGTH=251	Translocon-associated protein subunit alpha OS=Oryctolagus cuniculus GN=SSR1 PE=2 SV=1	Plasmamembrane;	26.5899	27.3045	27.1793	25.1782	25.3258	24.7352	25.2192	25.5072	25.3883	25.2224	24.9654	25.3788	3	25.7	27.709	4.613	0.0688716	0	42.578
Pg_S1642.4	methylenetetrahydrofolate reductase 2	AT2G44160.1	Q8KA62	AT2G44160.1 | Symbols: MTHFR2 | methylenetetrahydrofolate reductase 2 | chr2:18262301-18265185 FORWARD LENGTH=594	5,10-methylenetetrahydrofolate reductase OS=Buchnera aphidicola subsp. Schizaphis graminum (strain Sg) GN=metF PE=3 SV=1	Cytoplasmic;	27.606	28.0053	27.8531	27.889	27.8318	27.7709	29.0436	28.9452	28.9628	27.9037	27.6621	27.848	5	60.7	66.982	5.706	-0.222241	0	309.09
Pg_S1642.7	TCP-1/cpn60 chaperonin family protein	AT3G18190.1	Q6NF74	AT3G18190.1 | Symbols: | TCP-1/cpn60 chaperonin family protein | chr3:6232226-6233836 FORWARD LENGTH=536	60 kDa chaperonin 2 OS=Corynebacterium diphtheriae (strain ATCC 700971 / NCTC 13129 / Biotype gravis) GN=groL2 PE=3 SV=1	Cytoplasmic;	26.2194	25.6745	26.3511	27.6337	27.6698	27.7009	29.1145	29.2681	29.1013	27.594	27.545	27.5302	18	27.7	103.86	6.036	-0.283738	0	251.18
Pg_S1645.4	multifunctional protein 2	AT3G06860.1	B1VLT7	AT3G06860.1 | Symbols: MFP2, ATMFP2 | multifunctional protein 2 | chr3:2161926-2166009 FORWARD LENGTH=725	L-carnitine dehydrogenase OS=Streptomyces griseus subsp. griseus (strain JCM 4626 / NBRC 13350) GN=lcdH PE=3 SV=1	Cytoplasmic; Mitochondrial; Chloroplast	28.7236	28.5923	28.8216	28.7358	28.8198	28.9976	28.9194	28.962	28.8716	28.2988	28.1454	28.4	3	51.1	78.768	9.005	-0.0459834	0	188.95
Pg_S1645.6	alpha/beta-Hydrolases superfamily protein	AT4G16820.1	Q9P979	AT4G16820.1 | Symbols: PLA-I{beta]2 | alpha/beta-Hydrolases superfamily protein | chr4:9467563-9469116 FORWARD LENGTH=517	Feruloyl esterase A OS=Aspergillus awamori GN=faeA PE=1 SV=3	Cytoplasmic;	27.0933	26.7793	26.9188	27.2113	27.5887	27.3248	27.374	27.436	27.2548	27.0879	26.8553	26.7773	3	33.2	36.634	5.905	-0.0710769	0	34.923
Pg_S1647.24	FKBP-like peptidyl-prolyl cis-trans isomerase family protein	AT2G43560.1	O22870	AT2G43560.1 | Symbols: | FKBP-like peptidyl-prolyl cis-trans isomerase family protein | chr2:18073995-18075385 REVERSE LENGTH=223	Peptidyl-prolyl cis-trans isomerase FKBP16-3, chloroplastic OS=Arabidopsis thaliana GN=FKBP16-3 PE=1 SV=2	Mitochondrial; Chloroplast;	25.875	26.2447	25.8057	27.7396	27.707	27.66	26.28	25.8346	25.5776	27.7925	27.7774	27.7966	4	21.8	24.974	9.285	-0.0448718	0	85.86
Pg_S1647.3	pfkB-like carbohydrate kinase family protein	AT5G58730.1	-	AT5G58730.1 | Symbols: | pfkB-like carbohydrate kinase family protein | chr5:23723627-23725324 REVERSE LENGTH=353	-	Cytoplasmic; Mitochondrial; Chloroplast	28.1478	28.0806	28.1228	27.2158	27.0789	27.3196	27.0639	27.1362	24.1951	26.9861	26.9774	26.9567	6	21	38.931	7.848	-0.0379032	0	67.831
Pg_S1647.32	Cytochrome P450 superfamily protein	AT5G07990.1	O42430	AT5G07990.1 | Symbols: TT7, CYP75B1, D501 | Cytochrome P450 superfamily protein | chr5:2560437-2562859 FORWARD LENGTH=513	Cytochrome P450 1A1 OS=Limanda limanda GN=cyp1a1 PE=2 SV=1	Plasmamembrane; Chloroplast;	25.2371	25.0436	25.3027	26.3183	26.1771	26.2641	27.0454	27.0351	26.871	25.879	25.9689	26.2092	11	31.3	61.744	6.458	-0.151002	0	57.952
Pg_S1650.1	O-acetylserine (thiol) lyase B	AT2G43750.1	Q79FV4	AT2G43750.1 | Symbols: OASB, ACS1, CPACS1, ATCS-B | O-acetylserine (thiol) lyase B | chr2:18129604-18132322 REVERSE LENGTH=392	Uncharacterized pyridoxal phosphate-dependent protein CysK2 OS=Mycobacterium tuberculosis (strain ATCC 25618 / H37Rv) GN=cysK2 PE=3 SV=1	Chloroplast;	30.1077	30.065	30.0061	31.6106	31.5975	31.6114	31.2745	31.1868	31.1338	31.4506	31.4375	31.5756	1	70.6	40.222	7.364	0.00608466	0	323.31
Pg_S1650.4	Rhodanese/Cell cycle control phosphatase superfamily protein	AT1G17850.2	Q1QPC1	AT1G17850.2 | Symbols: | Rhodanese/Cell cycle control phosphatase superfamily protein | chr1:6146470-6148820 REVERSE LENGTH=448	UPF0176 protein Nham_1078 OS=Nitrobacter hamburgensis (strain X14 / DSM 10229) GN=Nham_1078 PE=3 SV=1	Chloroplast;	29.1152	29.1891	29.2158	30.7097	30.5887	30.5897	29.7709	29.7273	29.72	30.406	30.3829	30.4937	5	46.9	68.042	4.725	-0.0695375	0	323.31
Pg_S1652.19	zeaxanthin epoxidase (ZEP) (ABA1)	AT5G67030.1	P23262	AT5G67030.1 | Symbols: ABA1, LOS6, NPQ2, ATABA1, ZEP, IBS3, ATZEP | zeaxanthin epoxidase (ZEP) (ABA1) | chr5:26753745-26757090 REVERSE LENGTH=667	Salicylate hydroxylase OS=Pseudomonas putida GN=nahG PE=1 SV=4	Chloroplast;	29.5118	29.8367	29.7572	28.3614	28.1377	28.0785	27.8498	27.8461	27.6697	28.3638	28.0893	28.323	3	28.9	72.358	6.517	-0.295202	0	75.245
Pg_S1657.4	thioredoxin M-type 4	AT3G15360.1	P85801	AT3G15360.1 | Symbols: ATHM4, TRX-M4, ATM4 | thioredoxin M-type 4 | chr3:5188448-5189457 FORWARD LENGTH=193	Thioredoxin H-type OS=Populus jackii PE=1 SV=1	Chloroplast;	28.4234	28.7254	28.9537	29.1371	29.0487	29.242	29.1125	29.1831	28.948	29.6993	29.48	29.6326	2	20.2	20.137	9.148	0.143617	0	14.272
Pg_S1658.28	ubiquitin activating enzyme 2	AT5G06460.1	A2VE14	AT5G06460.1 | Symbols: ATUBA2, UBA 2 | ubiquitin activating enzyme 2 | chr5:1970239-1974382 FORWARD LENGTH=1077	SUMO-activating enzyme subunit 1 OS=Bos taurus GN=SAE1 PE=2 SV=1	Cytoplasmic; Nuclear;	25.7529	25.9795	25.6867	26.3843	26.3283	26.1536	26.3183	26.6039	26.3067	26.1256	26.0065	26.1306	5	21.8	120.75	5.182	-0.220795	0	24.316
Pg_S1921.14	peroxisomal 3-ketoacyl-CoA thiolase 3	AT2G33150.1	A0KV75	AT2G33150.1 | Symbols: PKT3, PED1, KAT2 | peroxisomal 3-ketoacyl-CoA thiolase 3 | chr2:14047814-14050983 REVERSE LENGTH=462	3-ketoacyl-CoA thiolase OS=Shewanella sp. (strain ANA-3) GN=fadI PE=3 SV=1	Chloroplast;	29.5661	29.4229	29.4076	29.6055	29.5587	29.4536	29.065	29.202	29.3802	29.1615	29.1679	29.2198	15	50.6	48.726	7.19	-0.0310345	0	134.87
Pg_S3125.12	Aldolase superfamily protein	AT1G69740.1	Q59295	AT1G69740.1 | Symbols: HEMB1 | Aldolase superfamily protein | chr1:26232197-26234713 FORWARD LENGTH=430	Delta-aminolevulinic acid dehydratase (Fragment) OS=Clostridium josui GN=hemB PE=3 SV=1	Chloroplast;	25.3497	25.5686	25.537	26.7389	26.9365	26.8935	26.8695	26.8012	26.6417	27.1766	27.0476	27.0265	8	27.6	42.691	6.838	-0.205102	0	102
Pg_S1668.13	6-phosphogluconate dehydrogenase family protein	AT3G02360.2	O33730	AT3G02360.2 | Symbols: | 6-phosphogluconate dehydrogenase family protein | chr3:482498-483958 FORWARD LENGTH=486	Uncharacterized oxidoreductase Sfri_1503 OS=Shewanella frigidimarina (strain NCIMB 400) GN=Sfri_1503 PE=3 SV=2	Cytoplasmic; Chloroplast;	27.9103	27.8087	27.8394	29.051	29.0939	29.0422	27.5317	27.5696	27.6699	29.051	28.7392	28.8204	6	53.3	53.38	5.531	-0.15679	0	54.997
Pg_S1669.10	secretion-associated RAS super family 2	AT4G02080.1	Q8SS09	AT4G02080.1 | Symbols: ASAR1, ATSARA1C, ATSAR2, SAR2 | secretion-associated RAS super family 2 | chr4:921554-922547 FORWARD LENGTH=193	Small COPII coat GTPase SAR1 OS=Encephalitozoon cuniculi (strain GB-M1) GN=SAR1 PE=1 SV=1	Extracellular; Cytoplasmic;	25.9876	25.8751	26.1518	28.9827	28.749	28.7753	27.6903	27.7485	27.5336	29.1395	29.3168	29.0996	1	57.8	22.691	7.122	-0.126633	0	58.283
Pg_S1669.8	calreticulin 1a	AT1G56340.1	Q9D9Q6	AT1G56340.1 | Symbols: CRT1, CRT1a, AtCRT1a | calreticulin 1a | chr1:21090059-21092630 REVERSE LENGTH=425	Calreticulin-3 OS=Mus musculus GN=Calr3 PE=1 SV=2	ER;	28.7508	28.5112	28.5705	28.0996	27.9321	28.0549	29.3672	29.4	29.5785	26.9777	26.6231	26.3842	2	42.1	44.647	4.304	-1.00692	0	58.803
Pg_S1669.9	lipoamide dehydrogenase 1	AT3G16950.2	P50970	AT3G16950.2 | Symbols: LPD1, ptlpd1 | lipoamide dehydrogenase 1 | chr3:5786508-5790383 REVERSE LENGTH=623	Dihydrolipoyl dehydrogenase OS=Zymomonas mobilis subsp. mobilis (strain ATCC 31821 / ZM4 / CP4) GN=lpd PE=3 SV=3	Mitochondrial; Chloroplast;	25.8356	26.0292	25.9548	27.3104	27.1025	27.0981	27.9658	27.8388	27.7433	26.9044	27.5007	26.7634	7	37.1	60.442	6.801	0.0232517	0	105.9
Pg_S5056.8	AAA-type ATPase family protein	AT2G27600.1	Q6MDI5	AT2G27600.1 | Symbols: SKD1, VPS4, ATSKD1 | AAA-type ATPase family protein | chr2:11781226-11783730 FORWARD LENGTH=435	ATP-dependent zinc metalloprotease FtsH OS=Protochlamydia amoebophila (strain UWE25) GN=ftsH PE=3 SV=1	Cytoplasmic; Mitochondrial;	27.1245	27.1575	27.3375	28.7794	28.6758	29.4774	26.9691	27.2206	26.7061	28.8488	28.6907	29.0601	10	41.9	44.73	7.914	-0.355388	0	78.701
Pg_S1678.43	NAD(P)-binding Rossmann-fold superfamily protein	AT1G30620.1	Q31FG4	AT1G30620.1 | Symbols: HSR8, MUR4, UXE1 | NAD(P)-binding Rossmann-fold superfamily protein | chr1:10855496-10857970 FORWARD LENGTH=419	ADP-L-glycero-D-manno-heptose-6-epimerase OS=Thiomicrospira crunogena (strain XCL-2) GN=hldD PE=3 SV=1	Mitochondrial; Chloroplast;	27.1601	26.93	26.8176	27.2733	27.273	27.2105	26.5393	26.6823	26.8869	27.1175	27.134	27.1981	7	23.6	39.111	9.781	-0.140449	0	27.102
Pg_S1678.50	GLN phosphoribosyl pyrophosphate amidotransferase 1	AT2G16570.1	P41390	AT2G16570.1 | Symbols: ATASE, ATASE1, ASE1 | GLN phosphoribosyl pyrophosphate amidotransferase 1 | chr2:7180424-7182124 REVERSE LENGTH=566	Amidophosphoribosyltransferase OS=Schizosaccharomyces pombe (strain 972 / ATCC 24843) GN=ade4 PE=1 SV=1	Chloroplast;	28.1564	27.9585	27.7485	27.8885	27.8445	28.7465	25.8293	25.854	26.178	28.5326	28.5416	28.5153	14	27.5	63.382	6.424	-0.0893471	0	73.28
Pg_S1678.59	Coatomer, alpha subunit	AT1G62020.1	Q8TAF3	AT1G62020.1 | Symbols: | Coatomer, alpha subunit | chr1:22919814-22923728 FORWARD LENGTH=1216	WD repeat-containing protein 48 OS=Homo sapiens GN=WDR48 PE=1 SV=1	Cytoplasmic; Golgi;	27.5118	26.9509	27.5293	26.8734	27.1804	27.3247	27.4674	27.5934	27.5092	27.095	26.9514	27.1934	1	30.1	135.76	7.047	-0.2	0	111.29
Pg_S1679.11	51 kDa subunit of complex I	AT5G08530.1	Q52716	AT5G08530.1 | Symbols: CI51 | 51 kDa subunit of complex I | chr5:2759848-2761726 REVERSE LENGTH=486	Electron transport complex subunit RnfC OS=Rhodobacter capsulatus GN=rnfC PE=1 SV=1	Cytoplasmic; Mitochondrial;	27.8796	28.2348	27.9889	27.0604	27.2055	26.9395	26.9312	27.2173	26.9311	27.3829	27.0466	27.055	12	35.7	53.675	7.749	-0.370431	0	51.9
Pg_S1682.6	FKBP-like peptidyl-prolyl cis-trans isomerase family protein	AT2G43560.1	O22870	AT2G43560.1 | Symbols: | FKBP-like peptidyl-prolyl cis-trans isomerase family protein | chr2:18073995-18075385 REVERSE LENGTH=223	Peptidyl-prolyl cis-trans isomerase FKBP16-3, chloroplastic OS=Arabidopsis thaliana GN=FKBP16-3 PE=1 SV=2	Chloroplast;	27.2275	27.7639	27.5495	28.1075	28.0784	28.0825	27.5677	27.5032	27.5121	28.4834	28.2859	28.28	6	36.6	24.716	5.21	-0.0340517	0	25.937
Pg_S1692.18	Transketolase	AT2G45290.1	A4IQR7	AT2G45290.1 | Symbols: | Transketolase | chr2:18672737-18675589 FORWARD LENGTH=741	1-deoxy-D-xylulose-5-phosphate synthase OS=Geobacillus thermodenitrificans (strain NG80-2) GN=dxs PE=3 SV=1	Chloroplast;	34.4625	34.4661	34.5157	33.7093	33.6548	33.7231	33.5502	33.5976	33.6475	33.6996	33.6789	33.6218	7	68.1	79.671	6.08	-0.17973	0	323.31
Pg_S1698.3	Copper amine oxidase family protein	AT1G62810.1	Q812C9	AT1G62810.1 | Symbols: | Copper amine oxidase family protein | chr1:23258253-23261772 REVERSE LENGTH=712	Retina-specific copper amine oxidase OS=Mus musculus GN=Aoc2 PE=2 SV=2	Plasmamembrane;	29.3103	28.9776	29.0363	27.5234	27.4505	27.3634	30.7944	30.738	30.8662	27.2971	27.2277	27.272	25	51.9	73.925	6.858	-0.285452	0	323.31
Pg_S1703.25	alpha/beta-Hydrolases superfamily protein	AT4G16820.1	Q9P979	AT4G16820.1 | Symbols: PLA-I{beta]2 | alpha/beta-Hydrolases superfamily protein | chr4:9467563-9469116 FORWARD LENGTH=517	Feruloyl esterase A OS=Aspergillus awamori GN=faeA PE=1 SV=3	Cytoplasmic;	26.1895	25.792	25.84	27.2958	27.1261	27.1961	26.7365	26.7939	27.2817	27.4387	27.5018	27.41	7	59.5	23.657	4.956	0.0190698	0	48.968
Pg_S1703.34	eukaryotic release factor 1-3	AT3G26618.1	Q8ZU81	AT3G26618.1 | Symbols: ERF1-3 | eukaryotic release factor 1-3 | chr3:9788854-9790161 FORWARD LENGTH=435	Peptide chain release factor subunit 1 OS=Pyrobaculum aerophilum (strain ATCC 51768 / IM2 / DSM 7523 / JCM 9630 / NBRC 100827) GN=prf1 PE=3 SV=1	Plasmamembrane;	25.9064	26.3094	26.0081	26.3213	26.3075	26.2609	27.3657	27.3185	27.5489	26.0084	25.8702	25.8539	3	16.2	101.2	8.647	-0.0263506	0	62.412
Pg_S1703.39	ADP glucose pyrophosphorylase large subunit 1	AT5G19220.1	Q9CHN1	AT5G19220.1 | Symbols: ADG2, APL1 | ADP glucose pyrophosphorylase large subunit 1 | chr5:6463931-6466775 REVERSE LENGTH=522	Glucose-1-phosphate adenylyltransferase OS=Lactococcus lactis subsp. lactis (strain IL1403) GN=glgC PE=3 SV=1	Mitochondrial; Chloroplast;	29.3876	29.49	29.5258	30.6094	30.6551	30.7395	30.7992	30.8098	30.6347	30.7886	30.7964	30.6973	3	55	57.794	9.051	-0.170307	0	323.31
Pg_S1703.5	peroxiredoxin IIF	AT3G06050.1	O14313	AT3G06050.1 | Symbols: PRXIIF, ATPRXIIF | peroxiredoxin IIF | chr3:1826311-1827809 REVERSE LENGTH=201	Putative peroxiredoxin pmp20 OS=Schizosaccharomyces pombe (strain 972 / ATCC 24843) GN=pmp20 PE=2 SV=2	Cytoplasmic; Mitochondrial; Chloroplast	27.8071	27.6196	27.6301	28.0601	27.4373	27.5055	27.4519	26.9335	26.7295	27.1956	27.3785	27.0843	1	35.2	21.367	8.879	0.0351759	0	48.686
Pg_S1713.23	ureidoglycolate amidohydrolase	AT5G43600.1	A0QZE3	AT5G43600.1 | Symbols: ATAAH-2, UAH | ureidoglycolate amidohydrolase | chr5:17512651-17515280 FORWARD LENGTH=476	Putative hydrolase MSMEG_3995/MSMEI_3903 OS=Mycobacterium smegmatis (strain ATCC 700084 / mc(2)155) GN=MSMEG_3995 PE=1 SV=1	Cytoplasmic; Chloroplast;	28.3938	28.6163	28.1946	26.57	26.8736	26.3401	26.2311	25.86	25.5761	26.4947	25.8758	25.6937	9	36	47.131	4.991	-0.0981651	0	57.592
Pg_S1713.7	acylaminoacyl-peptidase-related	AT4G14570.1	Q10MJ1	AT4G14570.1 | Symbols: | acylaminoacyl-peptidase-related | chr4:8362586-8366525 FORWARD LENGTH=764	Probable glutamyl endopeptidase, chloroplastic OS=Oryza sativa subsp. japonica GN=GEP PE=2 SV=1	Plasmamembrane; Chloroplast;	29.1559	29.2132	29.4442	27.2056	27.5313	27.25	27.2873	27.1807	27.1836	27.3577	27.3943	27.256	16	29.4	89.246	5.587	0.00704739	0	80.179
Pg_S1717.3	glyoxalase 2-4	AT1G06130.1	A2C7W3	AT1G06130.1 | Symbols: GLX2-4 | glyoxalase 2-4 | chr1:1858034-1860640 REVERSE LENGTH=331	Hydroxyacylglutathione hydrolase OS=Prochlorococcus marinus (strain MIT 9303) GN=gloB PE=3 SV=1	Mitochondrial;	26.2554	26.2922	26.6216	25.4321	25.2156	25.5659	25.7466	25.3845	25.6089	25.2972	25.3059	25.2561	5	26.4	36.664	8.244	-0.193939	0	17.8
Pg_S1721.10	Tubulin binding cofactor C domain-containing protein	AT3G57890.2	Q08AV6	AT3G57890.2 | Symbols: | Tubulin binding cofactor C domain-containing protein | chr3:21438271-21441695 FORWARD LENGTH=609	TBCC domain-containing protein 1 OS=Xenopus laevis GN=tbccd1 PE=2 SV=1	Nuclear;	27.6798	28.0151	27.8486	25.6336	25.8673	25.5648	26.2665	26.4232	25.9804	26.0236	25.5914	25.853	3	37	63.303	5.427	-0.292	0	39.044
Pg_S1725.1	ribosomal protein S11	ATCG00750.1	Q749B1	ATCG00750.1 | Symbols: RPS11 | ribosomal protein S11 | chrC:78960-79376 REVERSE LENGTH=138	30S ribosomal protein S11 OS=Geobacter sulfurreducens (strain ATCC 51573 / DSM 12127 / PCA) GN=rpsK PE=3 SV=1	Mitochondrial; Nuclear;	26.8304	26.9195	27.0023	25.7861	25.7394	25.54	28.1788	28.1673	28.0556	26.0819	26.1209	26.0449	3	26.8	14.89	12.354	-0.376812	0	43.853
Pg_S1728.4	Aldolase-type TIM barrel family protein	AT5G13420.1	Q255E4	AT5G13420.1 | Symbols: | Aldolase-type TIM barrel family protein | chr5:4302080-4304212 REVERSE LENGTH=438	Transaldolase OS=Chlamydophila felis (strain Fe/C-56) GN=tal PE=3 SV=1	Peroxisomal;	30.0592	30.1237	30.1358	32.8738	32.7591	32.8354	32.9826	32.9484	32.974	32.6656	32.7216	32.6392	11	75.9	40.605	9.198	-0.00596206	0	323.31
Pg_S1734.1	NAD(P)-linked oxidoreductase superfamily protein	AT1G59960.1	P78736	AT1G59960.1 | Symbols: | NAD(P)-linked oxidoreductase superfamily protein | chr1:22071410-22073067 REVERSE LENGTH=326	NAD(P)H-dependent D-xylose reductase OS=Pachysolen tannophilus GN=XYL1 PE=1 SV=1	Cytoplasmic; Mitochondrial;	26.5956	26.4621	26.5707	28.6796	28.4352	28.8588	26.4917	26.4838	26.6112	29.2302	28.5235	28.7526	3	57.6	18.862	6.307	-0.0447059	0	98.169
Pg_S1746.17	Pyruvate kinase family protein	AT5G56350.1	P19680	AT5G56350.1 | Symbols: | Pyruvate kinase family protein | chr5:22820254-22822529 REVERSE LENGTH=498	Pyruvate kinase (Fragment) OS=Spiroplasma citri GN=pyk PE=3 SV=1	Cytoplasmic; Chloroplast;	29.2579	29.3028	29.1328	30.0475	30.4345	30.399	29.6606	29.5969	29.7489	30.2137	30.3029	30.1261	2	48.6	51.942	7.327	0.0101053	0	323.31
Pg_S1750.10	Thioesterase superfamily protein	AT1G48320.1	P77781	AT1G48320.1 | Symbols: | Thioesterase superfamily protein | chr1:17855024-17855577 REVERSE LENGTH=156	Esterase YdiI OS=Escherichia coli (strain K12) GN=ydiI PE=1 SV=1	Cytoplasmic;	25.6457	25.6341	25.7323	27.583	27.4805	27.5342	27.1236	27.2371	27.2638	27.7312	27.4944	27.6392	5	33.5	19.365	6.164	0.128324	0	18.881
Pg_S1758.3	Alkaline-phosphatase-like family protein	AT4G29680.1	Q6DDP3	AT4G29680.1 | Symbols: | Alkaline-phosphatase-like family protein | chr4:14538067-14539557 REVERSE LENGTH=496	Ectonucleotide pyrophosphatase/phosphodiesterase family member 6 OS=Xenopus laevis GN=enpp6 PE=2 SV=1	Chloroplast;	31.4209	31.3134	31.5007	29.1795	28.9878	29.0858	26.5291	26.3711	26.3598	29.1519	29.1108	29.1371	11	27.3	54.747	5.677	-0.211538	0	117.68
Pg_S1770.12	cytochrome P450, family 716, subfamily A, polypeptide 1	AT5G36110.1	Q9FG65	AT5G36110.1 | Symbols: CYP716A1 | cytochrome P450, family 716, subfamily A, polypeptide 1 | chr5:14195377-14197613 FORWARD LENGTH=477	Cytochrome P450 81D1 OS=Arabidopsis thaliana GN=CYP81D1 PE=2 SV=1	Plasmamembrane; Cytoplasmic; Mitochondrial	27.0908	27.0194	27.0473	28.1223	28.0236	28.0448	28.9881	28.9869	28.9777	28.1613	28.1866	28.2747	5	52.2	46.038	9.118	-0.11133	0	77.334
Pg_S4184.8	Heat shock protein 70 (Hsp 70) family protein	AT3G09440.1	Q83MH5	AT3G09440.1 | Symbols: | Heat shock protein 70 (Hsp 70) family protein | chr3:2903434-2905632 REVERSE LENGTH=649	Chaperone protein DnaK OS=Shigella flexneri GN=dnaK PE=3 SV=1	ER;	28.7091	28.7626	28.6668	28.1543	28.1681	28.5021	29.4358	29.4294	29.4507	28.4411	28.2693	28.2731	6	41.3	73.688	4.946	-0.446637	0	225.38
Pg_S1774.22	Albino or Glassy Yellow 1	AT4G01800.2	A6TLE7	AT4G01800.2 | Symbols: AGY1, SECA1 | Albino or Glassy Yellow 1 | chr4:770926-776134 REVERSE LENGTH=1042	Protein translocase subunit SecA 1 OS=Alkaliphilus metalliredigens (strain QYMF) GN=secA1 PE=3 SV=1	Chloroplast;	28.833	28.6298	28.8716	28.165	27.9584	28.127	28.6663	28.6584	28.552	28.0714	27.7099	27.9835	29	37.2	116.98	7.058	-0.386526	0	118.26
Pg_S1779.7	ethylene-dependent gravitropism-deficient and yellow-green-like 2	AT5G05740.1	Q9LMU1	AT5G05740.1 | Symbols: ATEGY2, EGY2 | ethylene-dependent gravitropism-deficient and yellow-green-like 2 | chr5:1724023-1726859 REVERSE LENGTH=556	Probable zinc metallopeptidase EGY3, chloroplastic OS=Arabidopsis thaliana GN=EGY3 PE=2 SV=1	Plasmamembrane;	27.4637	27.5263	27.4626	27.3132	27.4317	27.2655	26.7727	26.5035	26.7341	27.2046	27.1253	26.9636	2	19.3	58.523	4.937	0.132222	0	47.928
Pg_S1793.4	Coatomer, beta&apos; subunit	unknown	unknown	unknown	unknown	Plasmamembrane; Cytoplasmic;	29.6128	29.9625	29.7495	29.1931	29.279	29.4873	26.9155	26.7671	27.2477	29.4697	29.507	29.4637	4	21	71.025	6.518	-0.20512	0	65.417
Pg_S1797.6	non-intrinsic ABC protein 8	AT4G25450.1	Q8LPQ6	AT4G25450.1 | Symbols: ATNAP8, NAP8 | non-intrinsic ABC protein 8 | chr4:13009845-13013912 REVERSE LENGTH=714	ABC transporter B family member 28 OS=Arabidopsis thaliana GN=ABCB28 PE=2 SV=1	Plasmamembrane;	26.0729	26.9965	26.3774	28.016	27.942	28.0007	26.7167	26.6051	25.5321	28.3169	28.2888	28.7084	2	27	58.969	8.672	0.162936	0	47.63
Pg_S1798.6	beta-amylase 5	AT4G15210.1	P06547	AT4G15210.1 | Symbols: ATBETA-AMY, AT-BETA-AMY, RAM1, BMY1, BAM5 | beta-amylase 5 | chr4:8666734-8669357 REVERSE LENGTH=498	Beta-amylase OS=Bacillus circulans PE=3 SV=1	Cytoplasmic;	27.5221	27.0998	27.1624	28.8954	28.9502	28.8744	28.7794	28.7051	28.6368	29.1278	28.8928	29.0259	20	35.6	84.052	5.697	-0.388904	0	152.2
Pg_S1799.1	Oxidoreductase, zinc-binding dehydrogenase family protein	AT1G23740.1	B1IZH4	AT1G23740.1 | Symbols: | Oxidoreductase, zinc-binding dehydrogenase family protein | chr1:8398245-8399656 REVERSE LENGTH=386	L-threonine 3-dehydrogenase OS=Escherichia coli (strain ATCC 8739 / DSM 1576 / Crooks) GN=tdh PE=3 SV=1	Cytoplasmic;	29.1145	29.2098	29.2843	30.7421	30.6992	30.6293	31.367	31.4357	31.4798	30.5191	30.556	30.4428	5	67.1	32.937	5.428	0.0890323	0	323.31
Pg_S1804.3	rhamnose biosynthesis 1	AT1G78570.1	B3R3C0	AT1G78570.1 | Symbols: RHM1, ROL1, ATRHM1 | rhamnose biosynthesis 1 | chr1:29550110-29552207 FORWARD LENGTH=669	ADP-L-glycero-D-manno-heptose-6-epimerase OS=Cupriavidus taiwanensis (strain R1 / LMG 19424) GN=hldD PE=3 SV=1	Cytoplasmic; Mitochondrial;	26.9981	27.8516	27.9178	26.0794	26.6737	26.7343	28.8442	29.1044	29.3634	26.3487	25.9564	26.1942	1	39.4	75.579	6.924	-0.3875	0	137.25
Pg_S1847.24	RNA-binding KH domain-containing protein	AT3G04610.1	Q5RB68	AT3G04610.1 | Symbols: FLK | RNA-binding KH domain-containing protein | chr3:1250762-1254272 REVERSE LENGTH=577	Insulin-like growth factor 2 mRNA-binding protein 2 OS=Pongo abelii GN=IGF2BP2 PE=2 SV=1	Nuclear;	28.0449	28.0331	28.134	26.5276	26.5634	26.2967	28.004	27.7968	27.6653	26.4721	26.4193	26.4857	2	51.7	49.487	4.917	-0.522727	0	49.197
Pg_S1856.1	lactoylglutathione lyase family protein / glyoxalase I family protein	AT1G08110.4	Q948T6	AT1G08110.4 | Symbols: | lactoylglutathione lyase family protein / glyoxalase I family protein | chr1:2535463-2537630 FORWARD LENGTH=235	Lactoylglutathione lyase OS=Oryza sativa subsp. japonica GN=GLX-I PE=1 SV=2	Mitochondrial; Chloroplast;	27.2688	27.2278	27.2612	26.8963	27.0916	26.8536	26.191	26.0126	26.0019	26.7773	26.5417	26.6702	7	32.8	26.07	7.873	-0.421983	0	16.862
Pg_S1865.7	metallopeptidase M24 family protein	AT3G51800.2	Q9ZCD3	AT3G51800.2 | Symbols: ATG2, EBP1, ATEBP1 | metallopeptidase M24 family protein | chr3:19211261-19213568 REVERSE LENGTH=401	Methionine aminopeptidase OS=Rickettsia prowazekii (strain Madrid E) GN=map PE=1 SV=1	Cytoplasmic;	26.5546	26.8181	26.4281	26.6738	26.6263	26.8869	28.2681	28.4523	28.1161	27.4168	26.5761	26.5402	11	51.1	43.325	6.322	-0.395674	0	86.2
Pg_S1903.13	voltage dependent anion channel 1	AT3G01280.1	P07144	AT3G01280.1 | Symbols: VDAC1, ATVDAC1 | voltage dependent anion channel 1 | chr3:85754-87612 FORWARD LENGTH=276	Mitochondrial outer membrane protein porin OS=Neurospora crassa (strain ATCC 24698 / 74-OR23-1A / CBS 708.71 / DSM 1257 / FGSC 987) GN=B7H23.070 PE=2 SV=1	Plasmamembrane;	28.9353	29.0334	29.1227	28.3035	28.3335	28.2035	28.5876	28.5413	28.6199	28.3435	27.8354	28.0229	1	11	73.069	9.226	0.197478	0	102.66
Pg_S1915.15	nitrite reductase 1	AT2G15620.1	P0A1Y3	AT2G15620.1 | Symbols: NIR1, NIR, ATHNIR | nitrite reductase 1 | chr2:6810552-6812666 FORWARD LENGTH=586	Anaerobic sulfite reductase subunit C OS=Salmonella typhi GN=asrC PE=3 SV=1	Cytoplasmic; Mitochondrial;	28.1038	28.2294	28.218	28.155	27.9169	28.1111	26.8322	26.751	27.0298	27.8692	27.9263	28.0057	2	39.1	65.862	6.129	-0.343707	0	74.32
Pg_S1915.24	aldehyde dehydrogenase 10A8	AT1G74920.1	P42269	AT1G74920.1 | Symbols: ALDH10A8 | aldehyde dehydrogenase 10A8 | chr1:28139175-28142573 REVERSE LENGTH=501	5-carboxymethyl-2-hydroxymuconate semialdehyde dehydrogenase OS=Escherichia coli GN=hpcC PE=3 SV=1	Cytoplasmic; Chloroplast;	28.0209	28.0866	28.1643	28.6788	28.8134	28.6765	28.5712	27.926	28.4086	28.9708	28.6459	28.6523	2	54.5	54.654	5.144	-0.0765408	0	170.63
Pg_S4339.6	ARP protein (REF)	AT1G49670.2	P50165	AT1G49670.2 | Symbols: NQR | ARP protein (REF) | chr1:18381591-18386021 REVERSE LENGTH=652	Tropinone reductase homolog OS=Datura stramonium PE=2 SV=1	Cytoplasmic; Mitochondrial;	26.564	27.249	28.1732	26.321	25.9576	26.3094	26.7918	26.7912	26.7277	27.0179	26.6557	26.4264	10	25.1	68.556	8.66	0.102366	0	83.639
Pg_S1921.12	dehydratase family	AT3G23940.1	C4ZAW6	AT3G23940.1 | Symbols: | dehydratase family | chr3:8648780-8652323 FORWARD LENGTH=608	Dihydroxy-acid dehydratase OS=Eubacterium rectale (strain ATCC 33656 / VPI 0990) GN=ilvD PE=3 SV=1	Cytoplasmic;	27.4654	27.4265	27.5498	26.709	26.9108	26.965	28.0547	28.0765	28.0118	26.2566	26.5581	26.6308	3	37.7	64.126	4.65	-0.129293	0	91.989
Pg_S1921.13	Class II aminoacyl-tRNA and biotin synthetases superfamily protein	AT5G56680.1	Q97PR0	AT5G56680.1 | Symbols: SYNC1, EMB2755, SYNC1 ARATH | Class II aminoacyl-tRNA and biotin synthetases superfamily protein | chr5:22936645-22938841 FORWARD LENGTH=572	Asparagine--tRNA ligase OS=Streptococcus pneumoniae serotype 4 (strain ATCC BAA-334 / TIGR4) GN=asnS PE=1 SV=1	Cytoplasmic;	27.8658	28.2185	28.2382	28.9102	29.0283	28.9575	28.2888	28.5279	28.6085	28.694	28.7561	28.4528	3	39.3	60.156	5.921	-0.243762	0	173.23
Pg_S1930.1	FAD-dependent oxidoreductase family protein	AT5G48440.1	-	AT5G48440.1 | Symbols: | FAD-dependent oxidoreductase family protein | chr5:19629932-19632588 REVERSE LENGTH=459	-	Mitochondrial; Chloroplast;	26.7171	26.5391	26.4728	26.2667	25.8956	25.9724	27.9719	27.7759	28.0969	25.9715	25.8214	25.9204	10	21.4	68.962	7.89	-0.141456	0	29.602
Pg_S1935.2	ARM repeat superfamily protein	AT2G45720.1	Q59MN0	AT2G45720.1 | Symbols: | ARM repeat superfamily protein | chr2:18834468-18836129 FORWARD LENGTH=553	Vacuolar protein 8 OS=Candida albicans (strain SC5314 / ATCC MYA-2876) GN=VAC8 PE=3 SV=3	Cytoplasmic; Golgi;	25.0238	25.2343	25.4921	26.2644	26.5615	26.4913	27.1598	27.0805	27.0959	27.381	27.5165	27.5594	1	23.5	96.911	4.355	-0.023341	0	65.479
Pg_S1935.3	Heat shock protein 70 (Hsp 70) family protein	AT3G09440.1	Q83MH5	AT3G09440.1 | Symbols: | Heat shock protein 70 (Hsp 70) family protein | chr3:2903434-2905632 REVERSE LENGTH=649	Chaperone protein DnaK OS=Shigella flexneri GN=dnaK PE=3 SV=1	ER;	30.3768	30.2988	30.3901	30.1246	30.1524	30.1506	30.9749	30.9322	30.9492	30.204	30.0744	30.1001	1	45.6	73.688	4.839	-0.446188	0	286.81
Pg_S1941.7	regulatory particle non-ATPase 10	AT4G38630.1	O17453	AT4G38630.1 | Symbols: RPN10, MCB1, ATMCB1, MBP1 | regulatory particle non-ATPase 10 | chr4:18057357-18059459 REVERSE LENGTH=386	26S proteasome non-ATPase regulatory subunit 4 OS=Schistosoma mansoni PE=2 SV=2	Cytoplasmic; Nuclear;	27.9449	27.9346	28.0323	26.9862	27.0444	27.3535	27.5885	27.2956	27.2172	27.392	27.2784	27.3939	5	50.5	42.604	4.2	-0.350743	0	64.777
Pg_S1947.1	Late embryogenesis abundant protein, group 2	AT2G44060.1	P46519	AT2G44060.1 | Symbols: | Late embryogenesis abundant protein, group 2 | chr2:18226922-18227988 FORWARD LENGTH=325	Desiccation protectant protein Lea14 homolog OS=Glycine max PE=2 SV=1	Cytoplasmic;	29.214	29.5889	29.5384	29.6739	29.8225	29.8611	27.5225	27.9214	27.8284	29.7831	29.757	29.5815	1	61.2	35.223	4.55	-0.378549	0	110.19
Pg_S1947.6	NAD(P)-linked oxidoreductase superfamily protein	AT1G59960.1	P78736	AT1G59960.1 | Symbols: | NAD(P)-linked oxidoreductase superfamily protein | chr1:22071410-22073067 REVERSE LENGTH=326	NAD(P)H-dependent D-xylose reductase OS=Pachysolen tannophilus GN=XYL1 PE=1 SV=1	Cytoplasmic;	29.2356	28.8927	28.884	30.007	30.1559	30.2072	27.189	27.2566	27.1621	30.1385	30.2218	30.1731	8	42	38.379	6.18	-0.240517	0	150.6
Pg_S1954.1	Protein of unknown function (DUF3411)	AT5G12470.1	-	AT5G12470.1 | Symbols: | Protein of unknown function (DUF3411) | chr5:4044950-4047290 REVERSE LENGTH=386	-	Plasmamembrane; Chloroplast;	25.9652	26.2103	26.5266	25.3408	25.2554	24.948	26.2451	26.742	26.2231	25.6831	25.8475	25.6135	10	19.1	62.32	8.411	-0.0775832	0	35.381
Pg_S1954.7	plantacyanin	AT2G02850.1	P80728	AT2G02850.1 | Symbols: ARPN | plantacyanin | chr2:826630-827720 REVERSE LENGTH=129	Mavicyanin OS=Cucurbita pepo PE=1 SV=1	Extracellular;	30.2617	30.5053	30.3306	27.6802	27.6039	27.6122	29.1963	29.197	29.3741	28.0345	28.0237	27.647	5	48	13.07	9.736	0.155285	0	121.29
Pg_S7205.10	germin 3	AT5G20630.1	P09351	AT5G20630.1 | Symbols: GLP3, GLP3A, GLP3B, ATGER3, GER3 | germin 3 | chr5:6975315-6975950 REVERSE LENGTH=211	Spherulin-1B OS=Physarum polycephalum PE=2 SV=1	Plasmamembrane;	30.4434	30.4753	30.2613	30.0161	29.9882	30.122	32.3589	32.3354	32.4376	27.3348	27.2168	27.696	2	33	21.747	6.911	0.669378	0	162.44
Pg_S5960.10	ankyrin repeat-containing 2B	AT2G17390.1	Q9W0T5	AT2G17390.1 | Symbols: AKR2B | ankyrin repeat-containing 2B | chr2:7555870-7557743 FORWARD LENGTH=344	Transient receptor potential channel pyrexia OS=Drosophila melanogaster GN=pyx PE=2 SV=2	Cytoplasmic; Nuclear;	29.5919	29.0312	29.1614	27.4491	27.805	27.1457	28.0163	28.0183	27.998	27.5797	27.4473	27.5972	10	49.4	37.057	4.253	-0.570058	0	103.5
Pg_S1974.16	Root hair defective 3 GTP-binding protein (RHD3)	AT3G13870.1	A2EK80	AT3G13870.1 | Symbols: RHD3 | Root hair defective 3 GTP-binding protein (RHD3) | chr3:4565762-4571109 REVERSE LENGTH=802	Protein SEY1 homolog 2 OS=Trichomonas vaginalis GN=TVAG_100140 PE=3 SV=1	Cytoplasmic;	27.6116	27.6949	27.91	26.346	26.6077	26.6652	26.9695	26.9798	26.1013	26.5928	26.8009	26.5261	1	23.7	90.296	5.258	-0.293235	0	60.153
Pg_S1974.32	Dihydrolipoamide acetyltransferase, long form protein	AT3G13930.1	Q59695	AT3G13930.1 | Symbols: | Dihydrolipoamide acetyltransferase, long form protein | chr3:4596240-4600143 FORWARD LENGTH=539	Dihydrolipoyllysine-residue acetyltransferase component of acetoin cleaving system OS=Pseudomonas putida GN=acoC PE=3 SV=1	Mitochondrial;	30.191	30.4133	30.0966	29.0639	28.9631	29.0306	27.9813	28.1677	27.885	29.0913	29.0477	29.0242	5	36.1	61.091	6.841	-0.354352	0	81.702
Pg_S1979.33	light-harvesting chlorophyll B-binding protein 3	AT5G54270.1	Q40301	AT5G54270.1 | Symbols: LHCB3, LHCB3*1 | light-harvesting chlorophyll B-binding protein 3 | chr5:22038424-22039383 FORWARD LENGTH=265	Fucoxanthin-chlorophyll a-c binding protein E, chloroplastic OS=Macrocystis pyrifera GN=FCPE PE=2 SV=1	Chloroplast;	27.3682	27.36	27.7272	31.2033	30.8207	30.8021	30.2048	30.2643	30.1747	30.0785	30.0087	29.5973	2	63	17.53	4.497	0.194444	0	79.053
Pg_S6874.1	GTP-binding protein-related	AT1G56050.1	Q71ZD3	AT1G56050.1 | Symbols: | GTP-binding protein-related | chr1:20963793-20966181 FORWARD LENGTH=421	GTPase Obg OS=Listeria monocytogenes serotype 4b (strain F2365) GN=obg PE=3 SV=1	Cytoplasmic;	25.3354	25.2593	24.9867	27.7336	27.5861	27.6422	26.2551	26.7213	26.7336	27.4761	27.57	27.532	10	39.5	40.207	4.987	-0.0894595	0	78.56
Pg_S2003.11	2-oxoacid dehydrogenases acyltransferase family protein	AT3G06850.1	Q73WX4	AT3G06850.1 | Symbols: BCE2, LTA1, DIN3 | 2-oxoacid dehydrogenases acyltransferase family protein | chr3:2158212-2160465 REVERSE LENGTH=483	Multifunctional 2-oxoglutarate metabolism enzyme OS=Mycobacterium paratuberculosis (strain ATCC BAA-968 / K-10) GN=kgd PE=3 SV=1	Mitochondrial; Chloroplast;	29.2744	29.0688	29.1236	28.1775	28.057	28.3053	28.6909	28.4264	28.4806	28.0638	28.0155	28.1899	12	43.6	49.409	8.305	0.0682105	0	89.15
Pg_S2003.15	Rad23 UV excision repair protein family	AT5G38470.1	P14794	AT5G38470.1 | Symbols: RAD23D | Rad23 UV excision repair protein family | chr5:15404720-15407500 FORWARD LENGTH=378	Ubiquitin-60S ribosomal protein L40 OS=Dictyostelium discoideum GN=ubqB PE=1 SV=2	Nuclear;	29.8315	29.7583	30.0758	28.3891	28.4718	28.594	28.2646	27.9283	28.1999	28.5049	28.742	28.6169	3	33.3	41.421	4.47	-0.229744	0	45.472
Pg_S2003.25	ribosomal protein L15	AT3G25920.1	P31165	AT3G25920.1 | Symbols: RPL15 | ribosomal protein L15 | chr3:9491268-9492558 REVERSE LENGTH=277	50S ribosomal protein L15, chloroplastic (Fragment) OS=Pisum sativum GN=RPL15 PE=1 SV=1	Mitochondrial; Chloroplast; Nuclear	27.3669	27.1468	27.4882	26.0823	25.4136	25.9719	27.5053	27.538	28.1803	27.2887	26.8704	26.952	8	20.5	37.69	10.758	-0.526801	0	68.453
Pg_S2003.3	protein phosphatase 2A subunit A2	unknown	unknown	unknown	unknown	Cytoplasmic;	26.8085	26.9664	27.7314	27.7984	27.5796	28.0709	27.7279	27.6313	27.4762	28.1753	27.9304	28.0453	4	45.8	65.754	4.772	0.126917	0	75.683
Pg_S3109.20	Pyridoxal-dependent decarboxylase family protein	AT5G11880.1	B5XUB1	AT5G11880.1 | Symbols: | Pyridoxal-dependent decarboxylase family protein | chr5:3827806-3829942 REVERSE LENGTH=489	Biosynthetic arginine decarboxylase OS=Klebsiella pneumoniae (strain 342) GN=speA PE=3 SV=1	Cytoplasmic; Chloroplast;	26.8937	27.357	27.2268	27.4584	27.172	27.1213	27.7905	27.909	27.6373	27.1942	27.3263	27.299	3	29	53.488	6.617	-0.144513	0	98.116
Pg_S2014.21	vacuolar proton ATPase A3	AT4G39080.1	Q9HM61	AT4G39080.1 | Symbols: VHA-A3 | vacuolar proton ATPase A3 | chr4:18209513-18214752 FORWARD LENGTH=821	V-type ATP synthase subunit I OS=Thermoplasma acidophilum (strain ATCC 25905 / DSM 1728 / JCM 9062 / NBRC 15155 / AMRC-C165) GN=atpI PE=3 SV=1	Plasmamembrane;	23.7928	23.8161	23.9043	26.9088	26.1295	26.8758	25.2521	26.1374	25.5064	27.1064	27.0255	26.9789	2	12.9	180.34	5.626	-0.141429	0	44.272
Pg_S2015.1	plastid ribosomal protein l11	AT1G32990.1	B9LI29	AT1G32990.1 | Symbols: PRPL11 | plastid ribosomal protein l11 | chr1:11955827-11957139 FORWARD LENGTH=222	50S ribosomal protein L11 OS=Chloroflexus aurantiacus (strain ATCC 29364 / DSM 637 / Y-400-fl) GN=rplK PE=3 SV=1	Cytoplasmic; Mitochondrial;	25.0058	24.9417	24.8579	26.3029	26.0315	26.4388	26.995	27.0367	27.0833	26.6014	26.7514	26.2181	5	33.1	16.779	9.578	-0.011875	0	11.814
Pg_S2015.3	protein kinase family protein	AT5G21222.1	O23169	AT5G21222.1 | Symbols: | protein kinase family protein | chr5:7209422-7213700 FORWARD LENGTH=831	Pentatricopeptide repeat-containing protein At4g37170 OS=Arabidopsis thaliana GN=PCMP-H5 PE=3 SV=1	Cytoplasmic;	26.4913	26.7608	26.3146	26.8415	26.7997	26.7914	27.3474	27.2049	27.2309	26.9385	26.9078	26.6014	6	8.8	95.27	6.132	-0.340306	0	25.133
Pg_S3474.8	GroES-like family protein	AT1G23100.1	O59804	AT1G23100.1 | Symbols: | GroES-like family protein | chr1:8195867-8196336 FORWARD LENGTH=97	10 kDa heat shock protein, mitochondrial OS=Schizosaccharomyces pombe (strain 972 / ATCC 24843) GN=hsp10 PE=1 SV=1	Cytoplasmic; Mitochondrial;	24.7503	25.3082	24.9359	27.0984	26.892	26.9919	26.7502	26.7944	26.5968	29.4837	29.4139	29.3897	6	68	10.44	9.842	-0.0927835	0	50.762
Pg_S2020.13	Insulinase (Peptidase family M16) protein	AT3G02090.2	O31766	AT3G02090.2 | Symbols: MPPBETA | Insulinase (Peptidase family M16) protein | chr3:365624-368534 FORWARD LENGTH=535	Uncharacterized zinc protease YmfH OS=Bacillus subtilis (strain 168) GN=ymfH PE=3 SV=2	Mitochondrial;	25.7002	25.6757	25.6541	27.6642	27.7375	27.906	24.3308	26.9555	26.9936	27.7874	27.7056	27.7537	6	30	53.513	7.338	-0.310504	0	35.785
Pg_S2020.22	SPFH/Band 7/PHB domain-containing membrane-associated protein family	AT5G62740.1	O60121	AT5G62740.1 | Symbols: HIR1, ATHIR1 | SPFH/Band 7/PHB domain-containing membrane-associated protein family | chr5:25201320-25202535 FORWARD LENGTH=286	Uncharacterized protein C16G5.07c OS=Schizosaccharomyces pombe (strain 972 / ATCC 24843) GN=SPBC16G5.07c PE=3 SV=1	Plasmamembrane;	30.6046	30.6072	30.6275	28.8024	28.7399	28.8282	27.9158	27.985	27.7915	28.8277	28.7909	28.7147	11	22.8	66.486	7.095	0.0015	0	82.693
Pg_S2035.29	cytosolic NADP+-dependent isocitrate dehydrogenase	AT1G65930.1	P40495	AT1G65930.1 | Symbols: cICDH | cytosolic NADP+-dependent isocitrate dehydrogenase | chr1:24539088-24541861 FORWARD LENGTH=410	Homoisocitrate dehydrogenase, mitochondrial OS=Saccharomyces cerevisiae (strain ATCC 204508 / S288c) GN=LYS12 PE=1 SV=1	Cytoplasmic;	29.6248	29.473	29.5638	30.9751	30.9938	30.9296	30.1172	30.2442	30.111	30.6483	30.6811	30.7588	9	38	67.693	6.206	-0.190594	0	249.55
Pg_S2036.7	cinnamyl-alcohol dehydrogenase	AT1G72680.1	Q15ZU4	AT1G72680.1 | Symbols: ATCAD1, CAD1 | cinnamyl-alcohol dehydrogenase | chr1:27359346-27360876 REVERSE LENGTH=355	L-threonine 3-dehydrogenase OS=Pseudoalteromonas atlantica (strain T6c / ATCC BAA-1087) GN=tdh PE=3 SV=1	Cytoplasmic;	28.2773	28.7493	28.4394	27.2618	27.2724	27.2337	26.4045	26.269	26.0556	27.2348	27.534	27.3552	7	24.5	38.911	6.147	-0.018663	0	25.737
Pg_S2044.6	NAD(P)-binding Rossmann-fold superfamily protein	AT1G30620.1	Q31FG4	AT1G30620.1 | Symbols: HSR8, MUR4, UXE1 | NAD(P)-binding Rossmann-fold superfamily protein | chr1:10855496-10857970 FORWARD LENGTH=419	ADP-L-glycero-D-manno-heptose-6-epimerase OS=Thiomicrospira crunogena (strain XCL-2) GN=hldD PE=3 SV=1	Chloroplast;	31.587	31.7872	31.8739	30.012	30.2421	30.1892	27.4071	27.4023	27.5266	30.1611	30.071	30.0473	24	44.2	66.231	7.798	-0.208911	0	203.37
Pg_S2057.16	disproportionating enzyme 2	AT2G40840.1	P15977	AT2G40840.1 | Symbols: DPE2 | disproportionating enzyme 2 | chr2:17045368-17050779 FORWARD LENGTH=955	4-alpha-glucanotransferase OS=Escherichia coli (strain K12) GN=malQ PE=3 SV=2	Cytoplasmic; Nuclear;	25.9941	26.6019	26.2605	26.2478	25.9386	25.9443	25.4226	25.6764	25.8962	25.9803	26.0287	25.9197	4	16.4	125.73	5.952	-0.368364	0	29.731
Pg_S2058.8	Leucine-rich repeat transmembrane protein kinase	AT1G56140.1	O81069	AT1G56140.1 | Symbols: | Leucine-rich repeat transmembrane protein kinase | chr1:21001708-21007725 REVERSE LENGTH=1033	Probable leucine-rich repeat receptor-like protein kinase At2g28990 OS=Arabidopsis thaliana GN=At2g28990 PE=2 SV=1	Plasmamembrane; Chloroplast;	26.3565	26.0833	26.8232	25.4673	25.355	25.4035	25.7915	25.7481	25.5075	24.9321	25.009	25.2309	2	8.7	153	6.066	-0.0528703	0	30.309
Pg_S2069.19	alpha/beta-Hydrolases superfamily protein	AT4G16820.1	Q9P979	AT4G16820.1 | Symbols: PLA-I{beta]2 | alpha/beta-Hydrolases superfamily protein | chr4:9467563-9469116 FORWARD LENGTH=517	Feruloyl esterase A OS=Aspergillus awamori GN=faeA PE=1 SV=3	Cytoplasmic;	27.5757	27.6949	27.6364	30.3339	29.9141	29.8887	29.8625	29.8756	29.8503	30.0821	30.0614	30.1821	7	63.1	35.859	4.918	-0.100312	0	142.72
Pg_S2069.2	pyrophosphorylase 6	AT5G09650.1	Q6KZB3	AT5G09650.1 | Symbols: AtPPa6, PPa6 | pyrophosphorylase 6 | chr5:2991331-2993117 REVERSE LENGTH=300	Inorganic pyrophosphatase OS=Picrophilus torridus (strain ATCC 700027 / DSM 9790 / JCM 10055 / NBRC 100828) GN=ppa PE=3 SV=1	Cytoplasmic; Mitochondrial; Chloroplast	24.5399	24.8951	24.6019	26.1731	25.9378	26.3856	26.068	25.956	25.8765	26.7715	26.6349	26.5303	6	36.3	32.259	6.189	-0.385813	0	21.781
Pg_S2078.2	Photosystem I, PsaA/PsaB protein	ATCG00340.1	Q6B8U7	ATCG00340.1 | Symbols: PSAB | Photosystem I, PsaA/PsaB protein | chrC:37375-39579 REVERSE LENGTH=734	Photosystem I P700 chlorophyll a apoprotein A2 OS=Gracilaria tenuistipitata var. liui GN=psaB PE=3 SV=1	Plasmamembrane;	30.6834	30.8323	30.9291	33.1333	33.2764	33.2474	33.9356	33.9112	33.8691	32.9278	32.8061	32.6745	20	40.2	82.458	6.737	0.121662	0	323.31
Pg_S2093.20	alpha/beta-Hydrolases superfamily protein	AT4G16820.1	Q9P979	AT4G16820.1 | Symbols: PLA-I{beta]2 | alpha/beta-Hydrolases superfamily protein | chr4:9467563-9469116 FORWARD LENGTH=517	Feruloyl esterase A OS=Aspergillus awamori GN=faeA PE=1 SV=3	Unknown	27.3083	27.3399	27.3149	28.6176	28.7679	28.6601	28.3935	28.3429	28.2772	28.7206	28.7002	28.6026	4	44	36.613	5.493	-0.0178462	0	161.97
Pg_S2093.27	translationally controlled tumor protein	AT3G16640.1	Q6CTH3	AT3G16640.1 | Symbols: TCTP | translationally controlled tumor protein | chr3:5669709-5670729 REVERSE LENGTH=168	Translationally-controlled tumor protein homolog OS=Kluyveromyces lactis (strain ATCC 8585 / CBS 2359 / DSM 70799 / NBRC 1267 / NRRL Y-1140 / WM37) GN=KLLA0C12716g PE=3 SV=1	Cytoplasmic;	24.1479	24.0841	23.5183	25.6923	26.1326	25.6926	27.6752	27.8723	27.8164	25.4966	25.5305	25.5384	2	35.1	18.917	4.347	-0.394048	0	75.454
Pg_S2096.23	Cytosol aminopeptidase family protein	AT4G30920.1	Q41382	AT4G30920.1 | Symbols: | Cytosol aminopeptidase family protein | chr4:15046589-15049304 REVERSE LENGTH=583	DEAD-box ATP-dependent RNA helicase 7 OS=Spinacia oleracea GN=RH7 PE=2 SV=1	Cytoplasmic; Chloroplast;	25.3009	25.1246	25.3914	26.1162	25.993	25.9826	26.0076	26.1807	26.17	25.6294	25.8136	25.804	5	68.4	54.807	5.375	0.0876426	0	29.619
Pg_S5690.4	MIF4G domain-containing protein / MA3 domain-containing protein	AT5G57870.1	O82233	AT5G57870.1 | Symbols: eIFiso4G1 | MIF4G domain-containing protein / MA3 domain-containing protein | chr5:23439755-23443433 FORWARD LENGTH=780	Eukaryotic translation initiation factor isoform 4G-2 OS=Arabidopsis thaliana GN=EIF(ISO)4G2 PE=1 SV=1	Cytoplasmic; Nuclear;	28.29	28.3187	28.3948	26.2774	26.2865	26.5239	26.9576	26.5723	26.4825	26.6495	26.5792	26.499	9	27.6	83.824	7.895	-0.528667	0	49.767
Pg_S7970.1	ribosomal protein 1	AT1G43170.1	Q97BX7	AT1G43170.1 | Symbols: ARP1, emb2207, RPL3A, RP1 | ribosomal protein 1 | chr1:16266992-16268631 FORWARD LENGTH=389	50S ribosomal protein L3 OS=Thermoplasma volcanium (strain ATCC 51530 / DSM 4299 / JCM 9571 / NBRC 15438 / GSS1) GN=rpl3 PE=3 SV=1	Cytoplasmic;	28.3684	27.8703	28.329	29.0367	29.0114	29.1863	30.3095	30.4079	30.2069	28.6825	28.7809	28.8454	4	38.6	44.48	10.439	-0.654242	0	99.924
Pg_S2104.6	ATPase, AAA-type, CDC48 protein	AT5G03340.1	P46466	AT5G03340.1 | Symbols: | ATPase, AAA-type, CDC48 protein | chr5:810091-813133 REVERSE LENGTH=810	26S protease regulatory subunit 4 homolog OS=Oryza sativa subsp. japonica GN=TBP2 PE=2 SV=2	Cytoplasmic;	28.6494	28.5257	28.2217	27.8611	27.6248	27.9552	27.8108	27.6915	27.3345	27.6782	26.9231	27.373	8	61.8	86.867	4.935	-0.398592	0	92.206
Pg_S2105.1	ATP synthase subunit beta	ATCG00480.1	P56480	ATCG00480.1 | Symbols: ATPB, PB | ATP synthase subunit beta | chrC:52660-54156 REVERSE LENGTH=498	ATP synthase subunit beta, mitochondrial OS=Mus musculus GN=Atp5b PE=1 SV=2	Cytoplasmic; Chloroplast;	28.9379	29.0368	28.6591	30.4592	30.3637	30.5035	30.0107	30.0115	29.919	30.6244	30.8285	30.9317	8	74	31.897	4.695	-0.285121	0	323.31
Pg_S2113.13	Cytochrome C1 family	AT5G40810.1	P51131	AT5G40810.1 | Symbols: | Cytochrome C1 family | chr5:16340200-16342327 FORWARD LENGTH=307	Cytochrome b/c1 OS=Bradyrhizobium diazoefficiens (strain JCM 10833 / IAM 13628 / NBRC 14792 / USDA 110) GN=fbcH PE=1 SV=1	Mitochondrial;	24.874	25.0295	24.4654	27.0295	26.8152	26.9943	25.2406	26.1539	26.4409	27.7148	27.3264	27.6718	2	29.9	33.808	6.201	-0.211039	0	42.923
Pg_S2115.11	triosephosphate isomerase	AT2G21170.1	P48491	AT2G21170.1 | Symbols: TIM, PDTPI | triosephosphate isomerase | chr2:9071047-9073106 REVERSE LENGTH=315	Triosephosphate isomerase, cytosolic OS=Arabidopsis thaliana GN=CTIMC PE=1 SV=2	Cytoplasmic; Chloroplast;	26.9748	27.0036	26.9949	28.1717	27.9362	27.4784	27.6182	27.8507	27.6058	27.6208	27.516	27.9953	1	68.8	27.214	5.363	0.155336	0	49.557
Pg_S2124.22	NmrA-like negative transcriptional regulator family protein	AT4G39230.1	O65679	AT4G39230.1 | Symbols: | NmrA-like negative transcriptional regulator family protein | chr4:18266024-18267604 REVERSE LENGTH=308	Probable pinoresinol-lariciresinol reductase 3 OS=Arabidopsis thaliana GN=PLR3 PE=3 SV=2	Cytoplasmic;	27.1338	27.1485	27.0956	29.5777	29.5708	29.4873	27.3654	27.2246	27.3979	29.235	29.4899	29.5878	8	32.1	34.055	5.552	-0.0866883	0	50.954
Pg_S2124.26	ornithine carbamoyltransferase	AT1G75330.1	A1KJ73	AT1G75330.1 | Symbols: OTC | ornithine carbamoyltransferase | chr1:28266457-28268383 REVERSE LENGTH=375	Ornithine carbamoyltransferase OS=Mycobacterium bovis (strain BCG / Pasteur 1173P2) GN=argF PE=3 SV=1	Chloroplast;	25.4116	25.8476	26.0405	27.5864	27.4888	27.4266	27.4957	27.3358	27.3921	27.3492	27.6063	27.8673	1	28.2	41.494	6.795	-0.0377309	0	46.826
Pg_S2135.7	12-oxophytodienoate reductase 2	AT1G76690.1	P41816	AT1G76690.1 | Symbols: OPR2, ATOPR2 | 12-oxophytodienoate reductase 2 | chr1:28778976-28780355 FORWARD LENGTH=374	NADPH dehydrogenase 3 OS=Saccharomyces cerevisiae (strain ATCC 204508 / S288c) GN=OYE3 PE=1 SV=2	Cytoplasmic; Mitochondrial;	28.4497	28.1405	28.4136	27.7447	27.9747	28.1259	27.5739	27.1587	26.2007	27.8031	28.1887	28.095	13	39.1	41.422	6.11	-0.363612	0	44.511
Pg_S2138.15	phosphofructokinase 3	AT4G26270.1	B8DHH7	AT4G26270.1 | Symbols: PFK3 | phosphofructokinase 3 | chr4:13301094-13304030 REVERSE LENGTH=489	ATP-dependent 6-phosphofructokinase OS=Listeria monocytogenes serotype 4a (strain HCC23) GN=pfkA PE=3 SV=1	Cytoplasmic;	27.4901	27.5777	27.4572	27.7184	27.8458	27.7549	27.0263	27.1416	26.9946	28.042	27.7507	27.821	11	44.1	52.616	5.768	-0.258824	0	57.566
Pg_S2145.24	protochlorophyllide oxidoreductase A	AT5G54190.1	Q96NR8	AT5G54190.1 | Symbols: PORA | protochlorophyllide oxidoreductase A | chr5:21991183-21992773 REVERSE LENGTH=405	Retinol dehydrogenase 12 OS=Homo sapiens GN=RDH12 PE=1 SV=3	Mitochondrial; Chloroplast;	27.5821	27.3848	27.3437	29.0398	28.9863	29.0577	32.9781	32.9267	32.9282	29.1999	29.0093	29.0041	3	62.2	43.585	9.13	-0.19975	0	323.31
Pg_S2145.4	ubiquitin-specific protease 14	AT3G20630.1	Q9T0E0	AT3G20630.1 | Symbols: UBP14, TTN6, ATUBP14, PER1 | ubiquitin-specific protease 14 | chr3:7203001-7208340 REVERSE LENGTH=797	Putative ATPase, plasma membrane-like OS=Arabidopsis thaliana GN=At4g11730 PE=3 SV=1	Cytoplasmic;	28.3359	28.4578	28.5231	27.7221	27.4986	27.7047	27.6758	27.6431	27.8481	27.416	27.407	27.2647	19	35.3	88.494	4.808	-0.290794	0	98.565
Pg_S2148.27	FtsH extracellular protease family	AT5G42270.1	Q9SSB4	AT5G42270.1 | Symbols: VAR1, FTSH5 | FtsH extracellular protease family | chr5:16902659-16905102 FORWARD LENGTH=704	26S protease regulatory subunit 7 homolog B OS=Arabidopsis thaliana GN=RPT1B PE=1 SV=2	Cytoplasmic; Chloroplast;	26.4411	26.4294	26.5577	27.3796	27.3749	27.3679	27.382	27.3369	27.2921	27.6946	27.6559	27.6576	4	70.3	64.527	5.036	-0.0746244	0	36.23
Pg_S2159.13	photosystem II reaction center protein B	ATCG00680.1	Q0P3P9	ATCG00680.1 | Symbols: PSBB | photosystem II reaction center protein B | chrC:72371-73897 FORWARD LENGTH=508	Photosystem II reaction center protein T OS=Ostreococcus tauri GN=psbT PE=3 SV=1	Plasmamembrane;	33.102	33.1114	33.1759	33.4892	33.4871	33.6794	34.3536	34.3281	34.3033	33.592	33.482	33.6852	8	40.7	50.171	6.651	0.0810573	0	323.31
Pg_S2159.5	ribosomal protein L2	ATCG01310.1	Q50264	ATCG01310.1 | Symbols: RPL2.2 | ribosomal protein L2 | chrC:152806-154312 FORWARD LENGTH=274	50S ribosomal protein L2 OS=Aster yellows phytoplasma GN=rplB PE=3 SV=1	Cytoplasmic; Mitochondrial; Nuclear	27.5235	27.4465	27.5948	27.0179	26.9393	26.8119	28.995	28.7993	29.0007	26.9664	26.7491	26.822	2	25.7	30.325	10.431	-0.519203	0	73.272
Pg_S2162.42	Insulinase (Peptidase family M16) protein	AT3G02090.2	O31766	AT3G02090.2 | Symbols: MPPBETA | Insulinase (Peptidase family M16) protein | chr3:365624-368534 FORWARD LENGTH=535	Uncharacterized zinc protease YmfH OS=Bacillus subtilis (strain 168) GN=ymfH PE=3 SV=2	Mitochondrial;	27.0198	26.5131	26.4833	28.5564	28.5706	27.5332	25.0009	24.6004	24.4689	27.8017	28.1948	27.7392	3	53	31.312	7.603	-0.425806	0	36.183
Pg_S2177.7	Cobalamin-independent synthase family protein	AT5G17920.1	Q65KT8	AT5G17920.1 | Symbols: ATCIMS, ATMETS, ATMS1 | Cobalamin-independent synthase family protein | chr5:5935771-5939195 FORWARD LENGTH=765	5-methyltetrahydropteroyltriglutamate--homocysteine methyltransferase OS=Bacillus licheniformis (strain DSM 13 / ATCC 14580) GN=metE PE=3 SV=1	Cytoplasmic; Chloroplast;	31.0313	30.8366	30.8572	31.8862	32.0189	32.021	33.1802	33.191	33.1202	31.8057	31.7582	31.7076	2	61.8	84.662	5.924	-0.15098	0	323.31
Pg_S4479.6	root FNR 2	AT1G30510.2	A8GAC4	AT1G30510.2 | Symbols: ATRFNR2, RFNR2 | root FNR 2 | chr1:10807150-10808984 REVERSE LENGTH=382	Na(+)-translocating NADH-quinone reductase subunit F OS=Serratia proteamaculans (strain 568) GN=nqrF PE=3 SV=1	Mitochondrial; Chloroplast;	29.3969	29.3484	29.5564	28.0852	28.0221	28.1949	27.3291	27.307	27.2082	28.3033	28.0986	28.0877	9	34.3	51.027	8.728	-0.532965	0	45.416
Pg_S2190.27	electron transfer flavoprotein alpha	AT1G50940.1	Q46907	AT1G50940.1 | Symbols: ETFALPHA | electron transfer flavoprotein alpha | chr1:18878038-18879939 REVERSE LENGTH=363	Putative electron transfer flavoprotein subunit YgcQ OS=Escherichia coli (strain K12) GN=ygcQ PE=3 SV=2	Mitochondrial; Chloroplast;	24.8376	24.8798	24.7148	26.1607	25.9024	25.6063	25.9656	25.8923	25.8663	25.3794	25.3113	25.8263	4	20.3	37.172	6.361	0.0242857	0	14.687
Pg_S2190.6	chloroplastic drought-induced stress protein of 32 kD	AT1G76080.1	Q9SGS4	AT1G76080.1 | Symbols: ATCDSP32, CDSP32 | chloroplastic drought-induced stress protein of 32 kD | chr1:28548063-28549348 REVERSE LENGTH=302	Thioredoxin-like protein CDSP32, chloroplastic OS=Arabidopsis thaliana GN=CDSP32 PE=1 SV=1	Cytoplasmic; Chloroplast; Nuclear	28.3341	28.6346	28.353	29.4363	29.318	29.3453	28.758	28.9687	29.0336	29.7645	29.6784	29.7867	1	44.3	34.881	7.402	-0.310423	0	137.11
Pg_S2206.18	6-phosphogluconate dehydrogenase family protein	AT3G02360.2	O33730	AT3G02360.2 | Symbols: | 6-phosphogluconate dehydrogenase family protein | chr3:482498-483958 FORWARD LENGTH=486	Uncharacterized oxidoreductase Sfri_1503 OS=Shewanella frigidimarina (strain NCIMB 400) GN=Sfri_1503 PE=3 SV=2	Mitochondrial; Chloroplast;	25.3672	25.8373	25.362	26.3043	25.7676	25.7637	26.7992	26.7718	26.5349	25.6749	25.7794	25.9967	5	55.9	15.042	5.868	0.212587	0	35.218
Pg_S2206.8	profilin 1	AT2G19760.1	Q6QNF8	AT2G19760.1 | Symbols: PFN1, PRF1 | profilin 1 | chr2:8517074-8518067 REVERSE LENGTH=131	Profilin OS=Naegleria gruberi PE=3 SV=1	Cytoplasmic;	27.5643	28.3455	28.2457	27.5448	27.0763	27.6424	28.9115	29.0774	28.1209	27.8586	27.164	27.7501	1	51.9	14.388	4.536	-0.161654	0	35.607
Pg_S2208.14	eukaryotic elongation factor 5A-1	AT1G13950.1	O50089	AT1G13950.1 | Symbols: EIF-5A, ELF5A-1, ATELF5A-1, EIF5A | eukaryotic elongation factor 5A-1 | chr1:4773631-4774668 FORWARD LENGTH=158	Translation initiation factor 5A OS=Pyrococcus horikoshii (strain ATCC 700860 / DSM 12428 / JCM 9974 / NBRC 100139 / OT-3) GN=eif5a PE=1 SV=1	Cytoplasmic; Nuclear;	26.7685	26.3433	26.1254	26.1687	26.2696	25.8787	26.7962	27.0346	26.9617	24.9174	25.6462	25.7121	4	66.9	17.545	5.41	-0.5525	0	45.597
Pg_S2241.35	phosphoglucomutase	AT5G51820.1	P33401	AT5G51820.1 | Symbols: PGM, ATPGMP, PGM1, STF1 | phosphoglucomutase | chr5:21063531-21067933 REVERSE LENGTH=623	Phosphoglucomutase-1 OS=Saccharomyces cerevisiae (strain ATCC 204508 / S288c) GN=PGM1 PE=1 SV=1	Cytoplasmic;	26.2004	26.0914	26.4232	25.6978	26.2991	26.249	26.2618	26.3261	26.4841	25.4418	25.591	25.8297	4	51.1	51.182	4.885	-0.190558	0	13.988
Pg_S2252.13	Calcium-dependent lipid-binding (CaLB domain) family protein	AT5G55530.1	-	AT5G55530.1 | Symbols: | Calcium-dependent lipid-binding (CaLB domain) family protein | chr5:22494439-22495656 FORWARD LENGTH=405	-	Cytoplasmic;	25.0307	24.6348	25.0097	25.977	26.2882	25.6369	25.4226	25.5183	25.6171	24.9195	25.2006	25.29	7	18.4	53.97	6.016	-0.07119	0	12.658
Pg_S2253.2	Tubulin/FtsZ family protein	AT4G14960.2	P28551	AT4G14960.2 | Symbols: TUA6 | Tubulin/FtsZ family protein | chr4:8548769-8550319 REVERSE LENGTH=450	Tubulin beta chain (Fragment) OS=Glycine max GN=TUBB PE=1 SV=2	Chloroplast;	26.3279	26.1918	25.267	25.6079	25.5753	26.1076	27.3999	27.398	27.0287	25.1399	25.393	26.0953	1	38.9	49.001	5.636	-0.0639309	0	57.463
Pg_S2259.22	rubredoxin family protein	AT5G17170.1	-	AT5G17170.1 | Symbols: ENH1 | rubredoxin family protein | chr5:5649335-5650975 FORWARD LENGTH=271	-	Chloroplast;	31.4126	31.0362	31.3292	30.1526	30.0168	30.1224	29.4355	29.4096	29.3353	30.1903	30.2914	30.2326	2	38.8	29.185	10.076	-0.13741	0	148.31
Pg_S2259.4	Ribosomal protein L6 family	AT1G05190.1	A1USQ9	AT1G05190.1 | Symbols: emb2394 | Ribosomal protein L6 family | chr1:1502515-1503738 REVERSE LENGTH=223	50S ribosomal protein L6 OS=Bartonella bacilliformis (strain ATCC 35685 / KC583) GN=rplF PE=3 SV=1	Cytoplasmic; Mitochondrial;	27.1242	27.2326	27.1842	28.6782	28.6833	28.8303	30.3487	30.2601	30.3745	28.8511	28.9849	28.9406	2	64.1	21.937	9.937	-0.345641	0	137.24
Pg_S2267.4	thylakoidal ascorbate peroxidase	AT1G77490.1	B1M869	AT1G77490.1 | Symbols: TAPX | thylakoidal ascorbate peroxidase | chr1:29117688-29120046 FORWARD LENGTH=426	Catalase-peroxidase OS=Methylobacterium radiotolerans (strain ATCC 27329 / DSM 1819 / JCM 2831) GN=katG PE=3 SV=1	Mitochondrial; Chloroplast;	28.7379	29.173	29.1745	29.2537	29.1677	29.3362	27.7639	27.7206	27.7124	30.3553	30.3725	30.552	3	33.6	45.995	8.256	-0.40782	0	89.316
Pg_S2289.15	alpha-glucan phosphorylase 2	AT3G46970.1	O66932	AT3G46970.1 | Symbols: ATPHS2, PHS2 | alpha-glucan phosphorylase 2 | chr3:17301625-17306111 REVERSE LENGTH=841	Glycogen phosphorylase OS=Aquifex aeolicus (strain VF5) GN=glgP PE=3 SV=1	Cytoplasmic;	27.9241	27.8919	27.773	29.0589	28.7281	28.7953	28.1335	28.1765	28.2804	29.1198	28.6302	28.8537	11	48	95.797	5.999	-0.368521	0	105.71
Pg_S2295.14	protein containing PDZ domain, a K-box domain, and a TPR region	AT1G55480.1	Q9SRY4	AT1G55480.1 | Symbols: ZKT | protein containing PDZ domain, a K-box domain, and a TPR region | chr1:20713822-20715351 FORWARD LENGTH=335	Protein LOW PSII ACCUMULATION 1, chloroplastic OS=Arabidopsis thaliana GN=LPA1 PE=1 SV=1	Chloroplast; Nuclear;	28.955	28.9668	28.6757	29.355	29.5553	29.4024	28.9788	28.9217	28.8382	29.5386	29.5834	29.6735	17	51.2	37.594	8.3	-0.696707	0	185.87
Pg_S4623.12	tubulin alpha-5	AT5G19780.1	Q9ZRB0	AT5G19780.1 | Symbols: TUA5 | tubulin alpha-5 | chr5:6687212-6688926 FORWARD LENGTH=450	Tubulin beta-3 chain OS=Triticum aestivum GN=TUBB3 PE=2 SV=1	Cytoplasmic;	26.9173	26.8671	26.9338	26.8764	26.5386	27.1591	26.1774	26.8471	26.2246	26.2169	26.218	25.8542	1	57.2	49.563	4.736	-0.145657	0	32.162
Pg_S2306.11	alpha-xylosidase 1	AT1G68560.1	Q9US55	AT1G68560.1 | Symbols: ATXYL1, XYL1, TRG1 | alpha-xylosidase 1 | chr1:25734435-25737897 REVERSE LENGTH=915	Glucosidase 2 subunit alpha OS=Schizosaccharomyces pombe (strain 972 / ATCC 24843) GN=gls2 PE=3 SV=1	Lysosomal;	26.745	27.3503	27.1126	22.8017	23.6682	23.6312	28.9798	29.3094	29.4957	23.8697	23.244	23.0868	3	34.7	103.84	6.383	-0.203644	0	107.61
Pg_S2306.26	SOUL heme-binding family protein	AT5G20140.2	Q9SR77	AT5G20140.2 | Symbols: | SOUL heme-binding family protein | chr5:6799066-6800892 REVERSE LENGTH=395	Heme-binding-like protein At3g10130, chloroplastic OS=Arabidopsis thaliana GN=At3g10130 PE=2 SV=1	Extracellular;	31.6213	31.8497	31.5789	30.1568	30.26	30.5346	28.87	28.9274	28.9073	30.6889	30.6862	30.5305	3	61.7	24.822	4.817	-0.144595	0	295.47
Pg_S2317.22	Aldolase-type TIM barrel family protein	AT5G13420.1	Q255E4	AT5G13420.1 | Symbols: | Aldolase-type TIM barrel family protein | chr5:4302080-4304212 REVERSE LENGTH=438	Transaldolase OS=Chlamydophila felis (strain Fe/C-56) GN=tal PE=3 SV=1	Cytoplasmic; Chloroplast;	26.6828	26.6494	26.6615	26.8104	26.5467	26.4992	26.3962	26.2264	26.528	26.7351	26.8937	26.9094	8	25.6	46.036	7.77	-0.32343	0	33.222
Pg_S2325.18	acyl-CoA oxidase 1	AT4G16760.1	P08503	AT4G16760.1 | Symbols: ACX1, ATACX1 | acyl-CoA oxidase 1 | chr4:9424930-9428689 REVERSE LENGTH=664	Medium-chain specific acyl-CoA dehydrogenase, mitochondrial OS=Rattus norvegicus GN=Acadm PE=1 SV=1	Peroxisomal;	26.6947	26.7777	26.5567	27.0458	26.8171	26.9261	27.6103	27.5105	27.5761	26.5619	27.0602	26.8879	2	27.7	74.337	6.526	-0.213554	0	70.86
Pg_S2326.10	Haloacid dehalogenase-like hydrolase (HAD) superfamily protein	AT4G26190.1	-	AT4G26190.1 | Symbols: | Haloacid dehalogenase-like hydrolase (HAD) superfamily protein | chr4:13262473-13266282 REVERSE LENGTH=1057	-	Cytoplasmic; Chloroplast;	27.7599	27.291	27.9233	29.1299	29.0443	28.9328	28.3687	28.1621	28.2624	28.9363	29.0598	28.9834	1	32.4	29.619	4.969	0.00145455	0	113.21
Pg_S2362.1	Galactose mutarotase-like superfamily protein	AT3G61610.1	P44160	AT3G61610.1 | Symbols: | Galactose mutarotase-like superfamily protein | chr3:22799480-22801029 FORWARD LENGTH=317	Putative glucose-6-phosphate 1-epimerase OS=Haemophilus influenzae (strain ATCC 51907 / DSM 11121 / KW20 / Rd) GN=HI_1317 PE=3 SV=1	Extracellular; Cytoplasmic;	28.442	28.4222	28.1795	27.0422	27.0367	27.2266	27.3648	27.6021	27.6431	27.0151	27.1271	27.1155	9	43.3	36.586	5.763	-0.316617	0	54.782
Pg_S4164.11	Ribosomal protein L3 family protein	AT2G43030.1	Q01W92	AT2G43030.1 | Symbols: | Ribosomal protein L3 family protein | chr2:17894898-17895713 FORWARD LENGTH=271	50S ribosomal protein L3 OS=Solibacter usitatus (strain Ellin6076) GN=rplC PE=3 SV=1	Mitochondrial; Nuclear;	27.6205	26.9371	27.4975	27.1953	26.991	26.7828	27.6755	27.6427	27.9883	26.4489	27.2682	27.032	7	34.8	32.571	10.846	-0.396622	0	189.2
Pg_S2369.5	ferredoxin 3	AT2G27510.1	P26395	AT2G27510.1 | Symbols: ATFD3, FD3 | ferredoxin 3 | chr2:11758281-11758748 REVERSE LENGTH=155	Protein RfbI OS=Salmonella typhimurium (strain LT2 / SGSC1412 / ATCC 700720) GN=rfbI PE=3 SV=1	Chloroplast;	26.5263	26.7538	26.4571	23.5122	23.4152	23.6421	30.2099	30.4449	30.2186	23.9544	24.1921	23.9682	1	50.3	15.973	4.709	-0.0761589	0	265.22
Pg_S2377.3	H(+)-ATPase 5	AT2G24520.1	P15718	AT2G24520.1 | Symbols: AHA5, HA5 | H(+)-ATPase 5 | chr2:10415522-10419730 FORWARD LENGTH=931	Putative Pol polyprotein from transposon element Bs1 OS=Zea mays PE=3 SV=1	Plasmamembrane; Cytoplasmic;	27.7521	27.5914	27.5405	28.4668	28.3916	28.5926	28.4014	28.6016	28.7085	28.6541	28.6527	28.5965	1	25.1	184.23	5.858	-0.184797	0	108.71
Pg_S2389.18	photosystem II subunit O-2	AT3G50820.1	P83504	AT3G50820.1 | Symbols: PSBO2, PSBO-2, OEC33 | photosystem II subunit O-2 | chr3:18891008-18892311 REVERSE LENGTH=331	Oxygen-evolving enhancer protein 1, chloroplastic (Fragment) OS=Brassica campestris GN=PSBO PE=1 SV=1	Chloroplast;	32.5894	33.3661	33.2456	30.0208	29.8225	29.4437	31.075	31.0196	31.2462	31.0939	30.5928	30.9516	2	60.9	34.913	6.771	-0.29	0	194.36
Pg_S2390.3	DNAJ heat shock family protein	AT3G62600.1	Q2SYZ3	AT3G62600.1 | Symbols: ATERDJ3B, ERDJ3B | DNAJ heat shock family protein | chr3:23151038-23153346 REVERSE LENGTH=346	Chaperone protein DnaJ OS=Burkholderia thailandensis (strain E264 / ATCC 700388 / DSM 13276 / CIP 106301) GN=dnaJ PE=3 SV=1	Chloroplast; Nuclear;	30.698	30.387	30.649	29.0334	28.6125	28.7365	28.2597	28.2065	28.2319	28.666	28.674	28.486	16	30.2	47.443	9.159	-0.394558	0	110.91
Pg_S2406.3	RNA-binding (RRM/RBD/RNP motifs) family protein	AT4G14300.1	Q6GLB5	AT4G14300.1 | Symbols: | RNA-binding (RRM/RBD/RNP motifs) family protein | chr4:8231179-8232785 FORWARD LENGTH=411	ELAV-like protein 1 OS=Xenopus tropicalis GN=elavl1 PE=2 SV=1	Mitochondrial; Nuclear;	28.4621	29.0735	28.554	26.0832	26.4551	26.2869	26.8747	27.082	26.8272	26.7443	26.8103	26.5439	2	19.6	57.118	8.852	-0.0895495	0	34.71
Pg_S2420.2	hydroxycinnamoyl-CoA shikimate/quinate hydroxycinnamoyl transferase	AT5G48930.1	Q8W1W9	AT5G48930.1 | Symbols: HCT | hydroxycinnamoyl-CoA shikimate/quinate hydroxycinnamoyl transferase | chr5:19836654-19838092 REVERSE LENGTH=433	Malonyl-coenzyme:anthocyanin 5-O-glucoside-6'''-O-malonyltransferase OS=Salvia splendens GN=5MAT1 PE=1 SV=1	Plasmamembrane; Cytoplasmic;	27.8261	27.8689	28.0628	26.8781	27.1569	27.5082	26.8504	26.9904	26.6603	26.9318	27.0856	27.4455	2	41.4	47.875	6.153	-0.130374	0	19.068
Pg_S2421.6	isocitrate dehydrogenase 1	AT4G35260.1	Q2SJD6	AT4G35260.1 | Symbols: IDH1, IDH-I | isocitrate dehydrogenase 1 | chr4:16774494-16776233 REVERSE LENGTH=367	3-isopropylmalate dehydrogenase OS=Hahella chejuensis (strain KCTC 2396) GN=leuB PE=3 SV=1	Cytoplasmic; Mitochondrial;	27.8647	27.9632	28.0385	27.9257	28.1941	28.3394	27.5199	27.687	27.79	27.9794	27.8406	27.6097	6	46.5	40.127	7.617	-0.0216216	0	77.67
Pg_S5464.7	GTP binding	AT5G65960.1	-	AT5G65960.1 | Symbols: | GTP binding | chr5:26385413-26387197 FORWARD LENGTH=393	-	Cytoplasmic;	27.4027	27.4862	27.7821	28.9074	28.8459	28.8677	28.5057	28.4827	28.2953	28.8289	28.8438	28.8847	19	65.5	44.559	6.419	-0.30533	0	141.64
Pg_S2440.12	methyl-CPG-binding domain 11	AT3G15790.1	Q9XI36	AT3G15790.1 | Symbols: MBD11, ATMBD11 | methyl-CPG-binding domain 11 | chr3:5343209-5344386 FORWARD LENGTH=254	Methyl-CpG-binding domain-containing protein 10 OS=Arabidopsis thaliana GN=MBD10 PE=1 SV=1	Cytoplasmic; Nuclear;	28.8059	28.4361	28.6074	26.5306	26.5945	26.6866	27.6623	27.7795	27.8193	27.002	27.1719	26.9709	2	27.3	36.56	4.539	-1.4203	0	184.8
Pg_S4181.13	Oxidoreductase, zinc-binding dehydrogenase family protein	AT1G23740.1	B1IZH4	AT1G23740.1 | Symbols: | Oxidoreductase, zinc-binding dehydrogenase family protein | chr1:8398245-8399656 REVERSE LENGTH=386	L-threonine 3-dehydrogenase OS=Escherichia coli (strain ATCC 8739 / DSM 1576 / Crooks) GN=tdh PE=3 SV=1	Cytoplasmic; Mitochondrial; Chloroplast	30.5983	30.609	30.4197	30.4771	30.485	30.4777	29.6913	29.7244	29.681	30.3746	30.1599	30.342	14	69.9	34.63	7.43	0.0285714	0	165.25
Pg_S2448.17	Early-responsive to dehydration stress protein (ERD4)	AT1G30360.1	Q12252	AT1G30360.1 | Symbols: ERD4 | Early-responsive to dehydration stress protein (ERD4) | chr1:10715892-10718799 FORWARD LENGTH=724	Phosphate metabolism protein 7 OS=Saccharomyces cerevisiae (strain ATCC 204508 / S288c) GN=PHM7 PE=1 SV=1	Plasmamembrane;	29.6141	29.7184	29.8064	28.4139	28.5772	28.4809	28.3846	28.3265	28.6987	28.2985	28.4117	28.4903	19	26.3	81.851	8.837	0.221162	0	84.942
Pg_S2448.23	multidrug resistance-associated protein 2	AT2G34660.1	Q492S9	AT2G34660.1 | Symbols: ATMRP2, EST4, MRP2, ABCC2, AtABCC2 | multidrug resistance-associated protein 2 | chr2:14603267-14612387 FORWARD LENGTH=1623	Lipid A export ATP-binding/permease protein MsbA OS=Blochmannia pennsylvanicus (strain BPEN) GN=msbA PE=3 SV=1	Plasmamembrane;	27.5725	27.5586	27.5541	28.4005	28.24	28.5931	27.5617	27.435	27.5627	28.0711	28.4835	28.2598	3	29.8	136.25	5.862	0.0221949	0	96.124
Pg_S2452.13	haloacid dehalogenase-like hydrolase family protein	AT5G53850.2	C5M5Z6	AT5G53850.2 | Symbols: | haloacid dehalogenase-like hydrolase family protein | chr5:21861155-21864817 REVERSE LENGTH=507	Enolase-phosphatase E1 OS=Candida tropicalis (strain ATCC MYA-3404 / T1) GN=UTR4 PE=3 SV=1	Cytoplasmic;	28.1548	28.1316	28.0365	27.4257	27.8165	27.5264	27.5813	27.0688	27.4121	27.3406	27.4107	27.2094	8	33.3	58.217	5.773	-0.133081	0	149
Pg_S2452.2	AAA-type ATPase family protein	AT2G27600.1	Q6MDI5	AT2G27600.1 | Symbols: SKD1, VPS4, ATSKD1 | AAA-type ATPase family protein | chr2:11781226-11783730 FORWARD LENGTH=435	ATP-dependent zinc metalloprotease FtsH OS=Protochlamydia amoebophila (strain UWE25) GN=ftsH PE=3 SV=1	Cytoplasmic;	26.7261	27.0042	26.894	27.6019	27.5175	27.2637	27.4755	27.2979	27.1062	27.4153	27.3002	27.6503	13	24	77.569	5.495	-0.098727	0	63.303
Pg_S2457.10	Ribosomal protein L10 family protein	AT2G40010.1	Q97BN3	AT2G40010.1 | Symbols: | Ribosomal protein L10 family protein | chr2:16708578-16710448 REVERSE LENGTH=317	50S ribosomal protein L10 OS=Thermoplasma volcanium (strain ATCC 51530 / DSM 4299 / JCM 9571 / NBRC 15438 / GSS1) GN=rpl10 PE=3 SV=1	Chloroplast;	26.4733	26.5095	25.8847	29.1587	28.6052	28.6077	29.6332	29.5171	29.5878	28.7354	28.521	28.3806	8	58.3	34.02	4.988	0.109657	0	146.37
Pg_S2462.1	disproportionating enzyme	AT5G64860.1	P65337	AT5G64860.1 | Symbols: DPE1 | disproportionating enzyme | chr5:25925373-25928788 REVERSE LENGTH=576	4-alpha-glucanotransferase OS=Mycobacterium bovis (strain ATCC BAA-935 / AF2122/97) GN=malQ PE=3 SV=1	Chloroplast;	24.812	24.3384	23.9858	27.4934	27.6571	27.5353	27.642	27.6587	27.6809	27.293	27.1238	27.015	15	41.5	65.351	6.572	-0.345502	0	82.963
Pg_S2468.19	ATPase, F1 complex, gamma subunit protein	AT4G04640.1	Q5QZI5	AT4G04640.1 | Symbols: ATPC1 | ATPase, F1 complex, gamma subunit protein | chr4:2350761-2351882 REVERSE LENGTH=373	ATP synthase gamma chain OS=Idiomarina loihiensis (strain ATCC BAA-735 / DSM 15497 / L2-TR) GN=atpG PE=3 SV=1	Chloroplast;	28.4702	29.3854	29.0472	30.3174	30.4854	30.3461	30.5969	30.5773	30.2858	30.8871	30.851	30.8091	9	47.7	41.472	5.844	-0.129973	0	323.31
Pg_S2473.26	NmrA-like negative transcriptional regulator family protein	AT4G39230.1	O65679	AT4G39230.1 | Symbols: | NmrA-like negative transcriptional regulator family protein | chr4:18266024-18267604 REVERSE LENGTH=308	Probable pinoresinol-lariciresinol reductase 3 OS=Arabidopsis thaliana GN=PLR3 PE=3 SV=2	Cytoplasmic;	31.2236	31.4262	31.5312	32.9442	32.9253	33.1423	30.1142	30.1459	29.9113	33.0221	33.0044	33.0601	1	71.1	33.863	6.014	-0.0772727	0	239.86
Pg_S2473.29	20S proteasome alpha subunit F2	AT1G47250.1	C3NFX2	AT1G47250.1 | Symbols: PAF2 | 20S proteasome alpha subunit F2 | chr1:17319220-17320900 FORWARD LENGTH=277	Proteasome subunit beta 1 OS=Sulfolobus islandicus (strain Y.N.15.51 / Yellowstone #2) GN=psmB1 PE=3 SV=1	Cytoplasmic; Chloroplast;	26.9747	26.9167	26.6891	28.7983	28.5392	28.293	27.5416	27.6634	27.4231	28.4177	28.3399	28.1936	7	38	29.943	4.998	-0.208333	0	41.587
Pg_S2473.30	INVOLVED IN: protein processing; LOCATED IN: mitochondrion, endoplasmic reticulum, plasma membrane, vacuole; EXPRESSED IN: 25 plant structures; EXPRESSED DURING: 13 growth stages; CONTAINS InterPro DOMAIN/s: Nicalin (InterPro:IPR016574), EF	unknown	unknown	unknown	unknown	Plasmamembrane;	28.0169	28.4078	28.6491	25.9604	25.5306	25.5783	25.3783	25.4441	25.6835	25.7126	25.3235	26.0957	11	33.1	61.568	6.222	0.0813953	0	32.168
Pg_S2486.2	NAD(P)-binding Rossmann-fold superfamily protein	AT1G30620.1	Q31FG4	AT1G30620.1 | Symbols: HSR8, MUR4, UXE1 | NAD(P)-binding Rossmann-fold superfamily protein | chr1:10855496-10857970 FORWARD LENGTH=419	ADP-L-glycero-D-manno-heptose-6-epimerase OS=Thiomicrospira crunogena (strain XCL-2) GN=hldD PE=3 SV=1	Plasmamembrane; Chloroplast;	25.7951	26.2839	26.6006	26.8042	26.5359	26.6948	26.0389	26.7891	26.0831	27.0552	27.0689	26.9339	6	29.7	29.069	6.953	-0.0810409	0	56.547
Pg_S2486.9	purine biosynthesis 4	AT1G74260.1	Q9CFE7	AT1G74260.1 | Symbols: PUR4 | purine biosynthesis 4 | chr1:27923005-27927764 REVERSE LENGTH=1407	Phosphoribosylformylglycinamidine synthase subunit PurQ OS=Lactococcus lactis subsp. lactis (strain IL1403) GN=purQ PE=3 SV=1	Plasmamembrane; Cytoplasmic;	28.5942	28.5104	28.6618	27.6036	27.4151	27.6213	28.1828	28.1783	27.9834	27.5097	27.4047	27.3311	4	22.4	168.19	5.436	-0.150294	0	74.132
Pg_S2490.10	ATP binding;leucine-tRNA ligases;aminoacyl-tRNA ligases;nucleotide binding;ATP binding;aminoacyl-tRNA ligases	AT1G09620.1	A5IKQ3	AT1G09620.1 | Symbols: | ATP binding;leucine-tRNA ligases;aminoacyl-tRNA ligases;nucleotide binding;ATP binding;aminoacyl-tRNA ligases | chr1:3113077-3116455 REVERSE LENGTH=1091	Leucine--tRNA ligase OS=Thermotoga petrophila (strain RKU-1 / ATCC BAA-488 / DSM 13995) GN=leuS PE=3 SV=1	Cytoplasmic;	26.7991	26.9205	26.9699	27.4224	27.2099	27.2471	27.3958	27.2927	27.3775	26.8853	27.0289	27.0486	1	39.5	60.436	6.244	-0.458835	0	45.558
Pg_S2499.11	Coatomer, beta&apos; subunit	unknown	unknown	unknown	unknown	Cytoplasmic; Golgi;	27.6051	27.6321	27.6081	27.4225	27.6919	27.4604	28.1315	28.2115	28.1649	27.3686	27.4344	27.3551	9	33.3	106.74	4.618	-0.265994	0	118.16
Pg_S6797.1	Quinone reductase family protein	AT4G27270.1	P54586	AT4G27270.1 | Symbols: | Quinone reductase family protein | chr4:13661458-13663243 REVERSE LENGTH=205	Uncharacterized protein YhcB OS=Bacillus subtilis (strain 168) GN=yhcB PE=3 SV=1	Cytoplasmic;	29.3127	29.0515	28.8925	28.058	28.2001	28.2677	26.8427	26.9927	26.7895	27.2654	27.0082	27.2171	5	31.9	24.953	6.681	-0.134052	0	34.762
Pg_S2507.15	GLU-ADT subunit B	AT1G48520.1	C0M7E9	AT1G48520.1 | Symbols: GATB | GLU-ADT subunit B | chr1:17940185-17942540 FORWARD LENGTH=550	Aspartyl/glutamyl-tRNA(Asn/Gln) amidotransferase subunit B OS=Streptococcus equi subsp. equi (strain 4047) GN=gatB PE=3 SV=1	Cytoplasmic; Mitochondrial;	26.4636	26.0262	26.2394	26.9241	26.9078	27.0224	27.0563	27.1145	26.906	26.419	26.4114	26.5447	11	30.5	56.504	6.967	-0.322593	0	48.272
Pg_S7284.3	Ribosomal protein L14p/L23e family protein	AT3G04400.1	P58139	AT3G04400.1 | Symbols: emb2171 | Ribosomal protein L14p/L23e family protein | chr3:1167339-1168308 FORWARD LENGTH=140	50S ribosomal protein L14, plastid OS=Euglena longa GN=rpl14 PE=3 SV=1	Mitochondrial; Chloroplast;	26.9508	26.8326	27.1877	25.5683	25.8	25.8931	28.2768	28.1754	28.0726	27.1065	26.9222	27.3099	6	48.6	15.015	10.826	-0.179286	0	100.6
Pg_S2510.1	PDI-like 1-3	AT3G54960.1	Q7KQL8	AT3G54960.1 | Symbols: ATPDIL1-3, PDI1, ATPDI1, PDIL1-3 | PDI-like 1-3 | chr3:20363514-20366822 REVERSE LENGTH=579	Thioredoxin OS=Plasmodium falciparum (isolate 3D7) GN=PF14_0545 PE=1 SV=1	ER;	29.177	29.1055	28.7491	26.0858	26.8411	26.2133	24.5751	24.828	25.2236	26.5246	26.2308	26.9647	2	31.8	63.853	4.596	-0.30614	0	39.619
Pg_S2524.23	glutamine synthetase 2	AT5G35630.1	Q60182	AT5G35630.1 | Symbols: GS2, GLN2, ATGSL1 | glutamine synthetase 2 | chr5:13831220-13833239 FORWARD LENGTH=430	Glutamine synthetase OS=Methanocaldococcus jannaschii (strain ATCC 43067 / DSM 2661 / JAL-1 / JCM 10045 / NBRC 100440) GN=glnA PE=3 SV=1	Cytoplasmic; Chloroplast;	29.7031	30.1509	30.6104	27.1704	27.8429	27.1572	28.8178	28.616	28.6789	27.6046	27.1871	27.5735	4	60.9	47.756	6.336	-0.461806	0	207.44
Pg_S2538.9	heat shock protein 101	AT1G74310.1	O15885	AT1G74310.1 | Symbols: ATHSP101, HSP101, HOT1 | heat shock protein 101 | chr1:27936715-27939862 REVERSE LENGTH=911	Heat shock protein 100 (Fragment) OS=Trypanosoma cruzi GN=HSP100 PE=3 SV=1	Cytoplasmic; Mitochondrial; Chloroplast	30.4563	30.3573	30.3879	31.201	31.2551	31.157	29.3765	29.5032	29.4996	31.386	31.4238	31.2692	7	53.8	101.01	5.809	-0.416484	0	323.31
Pg_S2565.1	trigger factor type chaperone family protein	AT5G55220.1	Q2JV31	AT5G55220.1 | Symbols: | trigger factor type chaperone family protein | chr5:22397677-22400678 FORWARD LENGTH=547	Trigger factor OS=Synechococcus sp. (strain JA-3-3Ab) GN=tig PE=3 SV=1	Cytoplasmic; Nuclear;	25.9852	25.2226	25.6508	27.1898	27.1804	26.8926	26.4368	26.4291	26.505	27.1507	26.7405	26.831	15	34.8	62.117	4.98	-0.445355	0	50.537
Pg_S2566.4	methylenetetrahydrofolate reductase 2	AT2G44160.1	Q8KA62	AT2G44160.1 | Symbols: MTHFR2 | methylenetetrahydrofolate reductase 2 | chr2:18262301-18265185 FORWARD LENGTH=594	5,10-methylenetetrahydrofolate reductase OS=Buchnera aphidicola subsp. Schizaphis graminum (strain Sg) GN=metF PE=3 SV=1	Cytoplasmic;	24.854	24.6977	24.8179	25.0669	24.9106	24.839	26.1984	26.1791	26.0335	24.953	24.7111	25.051	4	54.2	67.089	5.512	-0.250669	0	29.573
Pg_S2588.16	phosphoenolpyruvate carboxylase 3	AT3G14940.1	Q9A871	AT3G14940.1 | Symbols: ATPPC3, PPC3 | phosphoenolpyruvate carboxylase 3 | chr3:5025584-5029476 FORWARD LENGTH=968	Phosphoenolpyruvate carboxylase OS=Caulobacter crescentus (strain ATCC 19089 / CB15) GN=ppc PE=3 SV=1	Cytoplasmic;	27.219	26.9295	27.0182	27.6524	27.917	27.6651	26.8601	26.8964	27.2189	27.6568	27.3791	27.4455	12	46.2	110.13	5.626	-0.398548	0	56.005
Pg_S2590.16	Enoyl-CoA hydratase/isomerase family	AT4G29010.1	B8CH91	AT4G29010.1 | Symbols: AIM1 | Enoyl-CoA hydratase/isomerase family | chr4:14297312-14302016 REVERSE LENGTH=721	Fatty acid oxidation complex subunit alpha OS=Shewanella piezotolerans (strain WP3 / JCM 13877) GN=fadB PE=3 SV=1	Cytoplasmic; Mitochondrial;	29.5462	29.5801	29.5612	29.6867	29.6054	29.687	27.3133	27.7789	27.5798	29.4344	29.5042	29.6013	14	36.7	78.144	9.648	0.117289	0	116.21
Pg_S2592.5	photosystem II reaction center protein C	ATCG00280.1	Q9L8M2	ATCG00280.1 | Symbols: PSBC | photosystem II reaction center protein C | chrC:33720-35141 FORWARD LENGTH=473	Divinyl chlorophyll a/b light-harvesting protein PcbE OS=Prochlorococcus marinus (strain SARG / CCMP1375 / SS120) GN=pcbE PE=1 SV=1	Mitochondrial;	30.6314	30.4463	30.3971	33.6826	33.8537	33.8058	34.4112	34.3897	34.4735	33.5231	33.3481	33.4454	8	61	23.336	9.974	-0.181905	0	323.31
Pg_S2594.7	26S proteasome regulatory subunit S2 1A	AT2G20580.1	Q8SS65	AT2G20580.1 | Symbols: RPN1A, ATRPN1A | 26S proteasome regulatory subunit S2 1A | chr2:8859211-8864699 FORWARD LENGTH=891	26S proteasome regulatory subunit RPN1 OS=Encephalitozoon cuniculi (strain GB-M1) GN=RPN1 PE=1 SV=1	Cytoplasmic;	28.1015	28.3141	28.2157	29.3148	29.3054	29.4833	29.2017	29.1753	29.1806	29.2564	29.1818	29.2697	3	39	109.12	5.031	-0.197686	0	204.75
Pg_S3767.12	peroxisomal NAD-malate dehydrogenase 1	AT2G22780.1	Q88Q44	AT2G22780.1 | Symbols: PMDH1 | peroxisomal NAD-malate dehydrogenase 1 | chr2:9689995-9691923 REVERSE LENGTH=354	Probable malate dehydrogenase OS=Pseudomonas putida (strain KT2440) GN=mdh PE=3 SV=1	Mitochondrial; Peroxisomal;	28.1137	28.0017	27.8533	30.0272	30.0293	29.9119	28.2348	28.3148	28.7843	28.6498	28.324	28.8491	4	53.7	37.231	8.283	0.19774	0	172.01
Pg_S2611.4	carbonic anhydrase 1	AT3G01500.2	P9WPJ8	AT3G01500.2 | Symbols: CA1 | carbonic anhydrase 1 | chr3:194853-197873 REVERSE LENGTH=347	Carbonic anhydrase 2 OS=Mycobacterium tuberculosis (strain CDC 1551 / Oshkosh) GN=mtcA2 PE=3 SV=1	Chloroplast;	33.6402	33.7017	33.7651	33.8337	34.0465	34.0329	35.2672	35.1899	34.8736	33.7746	33.7801	33.8106	4	64	36.533	6.919	-0.0215339	0	323.31
Pg_S2631.6	hydroxypyruvate reductase	AT1G68010.2	P13443	AT1G68010.2 | Symbols: HPR | hydroxypyruvate reductase | chr1:25493418-25495720 FORWARD LENGTH=387	Glycerate dehydrogenase OS=Cucumis sativus GN=HPR-A PE=2 SV=1	Cytoplasmic; Chloroplast;	25.3819	25.4844	25.5817	24.6779	24.6379	24.9638	26.2679	26.2977	26.1077	25.2005	25.7373	25.2352	4	53.6	59.665	5.039	-0.103882	0	18.841
Pg_S2636.20	phosphoribulokinase	AT1G32060.1	P19824	AT1G32060.1 | Symbols: PRK | phosphoribulokinase | chr1:11532668-11534406 FORWARD LENGTH=395	Phosphoribulokinase, chloroplastic OS=Chlamydomonas reinhardtii GN=PRKA PE=1 SV=1	Plasmamembrane; Cytoplasmic;	27.2891	27.7705	27.938	29.3234	29.0772	28.9663	28.2442	27.9403	28.0174	29.332	29.2636	29.3882	2	35.8	67.185	5.824	-0.078727	0	30.206
Pg_S2647.19	Rubisco methyltransferase family protein	AT5G14260.3	-	AT5G14260.3 | Symbols: | Rubisco methyltransferase family protein | chr5:4601139-4603873 FORWARD LENGTH=514	-	Cytoplasmic;	24.8347	25.5867	25.1836	26.3913	26.1448	26.1097	25.574	25.3185	25.7086	25.1424	25.7293	25.5324	6	17.6	56.643	5.638	-0.202767	0	43.666
Pg_S2658.2	HIS HF	AT4G26900.1	Q3SPZ6	AT4G26900.1 | Symbols: AT-HF, HISN4 | HIS HF | chr4:13515514-13519608 FORWARD LENGTH=592	Imidazole glycerol phosphate synthase subunit HisH 2 OS=Nitrobacter winogradskyi (strain Nb-255 / ATCC 25391) GN=hisH2 PE=3 SV=1	Chloroplast;	26.7566	26.9937	27.0035	25.8732	26.0215	26.2299	27.6972	27.3465	27.2144	25.8128	25.9717	26.0214	3	40.2	59.146	6.161	-0.188848	0	66.233
Pg_S7525.3	NAD(P)-binding Rossmann-fold superfamily protein	AT1G30620.1	Q31FG4	AT1G30620.1 | Symbols: HSR8, MUR4, UXE1 | NAD(P)-binding Rossmann-fold superfamily protein | chr1:10855496-10857970 FORWARD LENGTH=419	ADP-L-glycero-D-manno-heptose-6-epimerase OS=Thiomicrospira crunogena (strain XCL-2) GN=hldD PE=3 SV=1	Cytoplasmic;	25.5636	25.7309	25.9159	25.6648	25.7517	26.0955	26.2906	25.92	25.9338	26.1325	25.9784	25.9294	8	28.9	58.313	4.985	-0.198088	0	19.907
Pg_S2672.19	acetyl Co-enzyme a carboxylase carboxyltransferase alpha subunit	AT2G38040.1	Q41008	AT2G38040.1 | Symbols: CAC3 | acetyl Co-enzyme a carboxylase carboxyltransferase alpha subunit | chr2:15917612-15920749 FORWARD LENGTH=769	Acetyl-coenzyme A carboxylase carboxyl transferase subunit alpha, chloroplastic OS=Pisum sativum GN=ACCA PE=1 SV=1	Cytoplasmic; Mitochondrial;	28.5102	28.0376	28.3975	26.9742	26.6514	26.6922	27.2938	27.2822	27.1815	26.7025	26.816	26.6572	5	33.6	83.733	8.475	-0.477748	0	45.556
Pg_S2673.5	thiazole biosynthetic enzyme, chloroplast (ARA6) (THI1) (THI4)	AT5G54770.1	P84548	AT5G54770.1 | Symbols: THI1, TZ, THI4 | thiazole biosynthetic enzyme, chloroplast (ARA6) (THI1) (THI4) | chr5:22246634-22247891 FORWARD LENGTH=349	Thiamine thiazole synthase, chloroplastic (Fragments) OS=Populus euphratica GN=THI1 PE=1 SV=1	Chloroplast;	25.5152	25.6605	25.2278	27.5019	27.4151	27.6253	28.7054	28.7867	28.5063	27.8736	27.4706	27.9263	1	45.4	37.605	4.882	0.111714	0	86.042
Pg_S2681.1	Enolase	AT2G36530.1	Q39T27	AT2G36530.1 | Symbols: LOS2, ENO2 | Enolase | chr2:15321081-15323786 REVERSE LENGTH=444	Enolase OS=Geobacter metallireducens (strain GS-15 / ATCC 53774 / DSM 7210) GN=eno PE=3 SV=1	Cytoplasmic; Nuclear;	31.6599	31.689	31.6076	32.0582	31.9922	31.9398	31.6608	31.8464	31.5991	31.9318	31.8154	31.9987	3	49.3	79.462	6.893	-0.724721	0	323.31
Pg_S2681.8	Aldolase superfamily protein	AT1G69740.1	Q59295	AT1G69740.1 | Symbols: HEMB1 | Aldolase superfamily protein | chr1:26232197-26234713 FORWARD LENGTH=430	Delta-aminolevulinic acid dehydratase (Fragment) OS=Clostridium josui GN=hemB PE=3 SV=1	Cytoplasmic;	25.4303	25.4994	25.3268	26.9879	26.7674	26.4161	28.0473	26.5267	27.7327	26.9356	26.9688	26.8215	8	72.9	38.405	7.206	-0.209777	0	155.47
Pg_S2687.5	heat shock cognate protein 70-1	AT5G02500.1	P0CW13	AT5G02500.1 | Symbols: HSC70-1, HSP70-1, AT-HSC70-1, HSC70 | heat shock cognate protein 70-1 | chr5:554055-556334 REVERSE LENGTH=651	Chaperone protein DnaK OS=Methanosarcina mazei (strain ATCC BAA-159 / DSM 3647 / Goe1 / Go1 / JCM 11833 / OCM 88) GN=dnaK PE=3 SV=1	Cytoplasmic;	32.9375	32.7655	32.9152	33.0693	33.0906	33.0919	33.3663	33.4204	33.3368	32.9475	32.9307	32.8967	2	61.1	70.817	4.919	-0.433643	0	323.31
Pg_S2688.13	SPFH/Band 7/PHB domain-containing membrane-associated protein family	AT5G62740.1	O60121	AT5G62740.1 | Symbols: HIR1, ATHIR1 | SPFH/Band 7/PHB domain-containing membrane-associated protein family | chr5:25201320-25202535 FORWARD LENGTH=286	Uncharacterized protein C16G5.07c OS=Schizosaccharomyces pombe (strain 972 / ATCC 24843) GN=SPBC16G5.07c PE=3 SV=1	Mitochondrial; Chloroplast;	29.3376	28.7706	29.2922	27.6333	27.5083	27.6897	25.9663	26.1501	26.3719	27.8848	27.747	27.6488	11	47.3	46.9	8.416	-0.344471	0	33.623
Pg_S2706.12	S-adenosyl-L-homocysteine hydrolase	AT4G13940.1	P26799	AT4G13940.1 | Symbols: HOG1, EMB1395, SAHH1, MEE58, ATSAHH1 | S-adenosyl-L-homocysteine hydrolase | chr4:8054931-8056676 FORWARD LENGTH=485	Adenosylhomocysteinase (Fragment) OS=Streptomyces fradiae GN=ahcY PE=3 SV=1	Cytoplasmic;	28.6974	28.7922	28.8868	30.4665	30.3653	30.3382	32.2341	32.2847	32.1539	30.0356	29.992	30.0654	13	77.3	53.14	5.708	-0.109072	0	323.31
Pg_S2819.7	Ribosomal S17 family protein	AT5G04800.1	Q8SSF9	AT5G04800.1 | Symbols: | Ribosomal S17 family protein | chr5:1389217-1389642 FORWARD LENGTH=141	40S ribosomal protein S17 OS=Encephalitozoon cuniculi (strain GB-M1) GN=RPS17 PE=1 SV=1	Mitochondrial; Nuclear;	24.2701	24.5502	24.2643	25.3463	25.3294	26.362	25.8389	26.4078	25.9619	28.4612	28.4606	28.5716	2	39.6	16.746	10.312	-0.575168	0	31.69
Pg_S2715.2	photosystem I light harvesting complex gene 2	AT3G61470.1	Q39709	AT3G61470.1 | Symbols: LHCA2 | photosystem I light harvesting complex gene 2 | chr3:22745736-22747032 FORWARD LENGTH=257	Fucoxanthin-chlorophyll a-c binding protein, chloroplastic OS=Isochrysis galbana GN=FCP PE=1 SV=1	Chloroplast;	28.7531	28.0112	27.9343	29.246	29.1142	29.2901	29.962	29.9184	29.8043	29.6814	29.7368	29.4379	2	31.1	29.117	6.882	-0.0144444	0	59.58
Pg_S2721.12	ferritin 4	AT2G40300.1	P19133	AT2G40300.1 | Symbols: ATFER4, FER4 | ferritin 4 | chr2:16831501-16833214 REVERSE LENGTH=259	Ferritin light chain (Fragment) OS=Sus scrofa GN=FTL PE=1 SV=1	Cytoplasmic;	26.5457	26.524	26.7158	27.7189	27.6665	27.6956	25.9166	25.6057	25.8024	28.6611	28.7681	28.7928	6	35.5	31.784	5.236	-0.384946	0	54.534
Pg_S2735.13	Sucrose-6F-phosphate phosphohydrolase family protein	AT2G35840.1	A9CK30	AT2G35840.1 | Symbols: | Sucrose-6F-phosphate phosphohydrolase family protein | chr2:15053952-15055776 FORWARD LENGTH=422	Mannosylfructose-phosphate phosphatase OS=Agrobacterium tumefaciens (strain C58 / ATCC 33970) GN=mfppA PE=1 SV=1	Cytoplasmic;	28.0648	28.0994	28.4562	29.811	29.5421	29.7341	28.584	28.6188	28.807	29.3163	29.3705	29.1714	2	54.7	47.825	5.446	-0.310329	0	106.37
Pg_S2748.13	isocitrate dehydrogenase	AT1G54340.1	P41019	AT1G54340.1 | Symbols: ICDH | isocitrate dehydrogenase | chr1:20283520-20286506 FORWARD LENGTH=416	3-isopropylmalate dehydrogenase OS=Bacillus megaterium (strain DSM 319) GN=leuB PE=3 SV=2	Cytoplasmic;	25.0799	25.589	25.4716	26.6428	26.7586	26.7904	25.1742	25.3968	25.0021	26.766	26.611	26.8407	7	39.8	46.719	7.851	-0.202651	0	17.01
Pg_S2748.7	metacaspase 4	AT1G79340.1	Q9FMG1	AT1G79340.1 | Symbols: AtMC4, MC4 | metacaspase 4 | chr1:29842849-29844368 FORWARD LENGTH=418	Metacaspase-3 OS=Arabidopsis thaliana GN=AMC3 PE=2 SV=1	Cytoplasmic; Nuclear;	28.6043	28.641	28.1196	27.3889	27.0136	27.0383	27.9472	27.979	28.0073	27.2266	26.9895	27.0628	11	43.3	45.572	5.129	-0.588702	0	70.969
Pg_S2753.1	D-mannose binding lectin protein with Apple-like carbohydrate-binding domain	AT5G03700.1	Q39086	AT5G03700.1 | Symbols: | D-mannose binding lectin protein with Apple-like carbohydrate-binding domain | chr5:965874-967322 REVERSE LENGTH=482	Receptor-like serine/threonine-protein kinase SD1-7 OS=Arabidopsis thaliana GN=SD17 PE=1 SV=1	Extracellular;	28.0391	27.7629	28.1952	25.7504	24.9428	25.7398	31.3995	31.1754	30.9777	25.9446	24.5619	25.7569	8	45	50.426	6.83	-0.311308	0	323.31
Pg_S2754.9	eif4a-2	AT1G54270.1	Q9QY16	AT1G54270.1 | Symbols: EIF4A-2 | eif4a-2 | chr1:20260495-20262018 FORWARD LENGTH=412	ATP-dependent RNA helicase DDX25 OS=Rattus norvegicus GN=Ddx25 PE=1 SV=2	Cytoplasmic; Nuclear;	29.2569	29.0683	29.0242	31.0547	30.9882	30.8999	31.4643	31.4158	31.2876	30.8885	30.8684	30.9468	2	69.7	46.923	5.11	-0.236804	0	323.31
Pg_S2755.15	NPL4-like protein 1	AT3G63000.1	A7TTC4	AT3G63000.1 | Symbols: NPL41 | NPL4-like protein 1 | chr3:23283836-23285357 FORWARD LENGTH=413	Nuclear protein localization protein 4 OS=Vanderwaltozyma polyspora (strain ATCC 22028 / DSM 70294) GN=NPL4 PE=3 SV=1	Cytoplasmic; Nuclear;	27.0351	27.0353	27.328	26.2304	26.2719	26.2917	26.2646	26.3974	26.5666	26.3491	26.3258	26.4658	8	28.8	46.431	5.301	-0.248426	0	21.6
Pg_S2758.4	glycyl-tRNA synthetase / glycine--tRNA ligase	AT1G29880.1	B9E6V6	AT1G29880.1 | Symbols: | glycyl-tRNA synthetase / glycine--tRNA ligase | chr1:10459662-10462781 REVERSE LENGTH=729	Glycine--tRNA ligase OS=Macrococcus caseolyticus (strain JCSC5402) GN=glyQS PE=3 SV=1	Cytoplasmic; Mitochondrial;	26.5415	27.0257	27.2215	27.5534	27.5382	27.8561	26.4173	25.897	25.8796	26.5634	26.4575	27.1783	3	11.8	80.882	7.263	-0.288719	0	32.857
Pg_S5470.8	sucrose synthase 3	AT4G02280.1	A7TZT2	AT4G02280.1 | Symbols: SUS3, ATSUS3 | sucrose synthase 3 | chr4:995166-998719 FORWARD LENGTH=809	Mannosylfructose-phosphate synthase OS=Agrobacterium tumefaciens (strain C58 / ATCC 33970) GN=mfpsA PE=1 SV=1	Cytoplasmic;	28.5313	29.0551	29.0352	29.5296	29.5277	29.5842	28.5348	29.1137	28.4734	29.3948	29.3938	29.2347	19	38.6	93.114	5.946	-0.281998	0	160.29
Pg_S2762.5	ribosomal protein L18	AT3G05590.1	P24558	AT3G05590.1 | Symbols: RPL18 | ribosomal protein L18 | chr3:1621511-1622775 FORWARD LENGTH=187	60S ribosomal protein L18 OS=Salmo salar GN=rpl18 PE=2 SV=1	Mitochondrial;	26.2994	26.42	26.3746	27.0623	26.8322	26.1304	27.0587	26.9976	26.858	28.322	28.5685	28.5323	1	33.8	35.21	10.451	-0.305414	0	38.365
Pg_S2768.18	ADP glucose pyrophosphorylase 1	unknown	unknown	unknown	unknown	Chloroplast;	29.357	29.4607	29.4512	29.9848	30.1925	30.244	29.445	29.5725	29.5637	29.901	30.0832	29.7643	15	51.5	45.109	7.063	-0.280392	0	182.26
Pg_S2773.19	MLP-like protein 28	AT1G70830.1	Q93VR4	AT1G70830.1 | Symbols: MLP28 | MLP-like protein 28 | chr1:26710203-26711395 REVERSE LENGTH=335	MLP-like protein 423 OS=Arabidopsis thaliana GN=MLP423 PE=2 SV=1	Cytoplasmic;	28.2907	28.0254	28.0981	30.6533	30.4578	30.6348	32.0624	32.0938	32.1072	31.2365	31.2637	31.1151	5	45.8	17.688	4.926	-0.490196	0	108.17
Pg_S2779.13	nodulin-related protein 1	AT2G03440.1	-	AT2G03440.1 | Symbols: NRP1, ATNRP1 | nodulin-related protein 1 | chr2:1039409-1039972 REVERSE LENGTH=187	-	Cytoplasmic; Nuclear;	27.3016	28.316	28.0925	25.2098	24.55	24.3257	27.8355	27.6745	28.4727	30.1492	30.1681	30.0737	1	66.1	11.997	4.582	-0.683929	0	65.031
Pg_S2784.3	DegP protease 1	AT3G27925.1	Q8YG32	AT3G27925.1 | Symbols: DEGP1, Deg1 | DegP protease 1 | chr3:10366659-10368864 REVERSE LENGTH=439	Probable periplasmic serine endoprotease DegP-like OS=Brucella melitensis biotype 1 (strain 16M / ATCC 23456 / NCTC 10094) GN=htrA PE=3 SV=1	Chloroplast;	31.1522	30.8628	30.9319	30.3457	30.4092	29.9845	29.1008	29.1368	28.8227	30.2134	29.9041	29.889	6	19.7	80.129	5.785	-0.0944369	0	157.48
Pg_S2791.12	Alanyl-tRNA synthetase, class IIc	AT5G22800.1	B0TFY7	AT5G22800.1 | Symbols: EMB86, EMB1030, EMB263 | Alanyl-tRNA synthetase, class IIc | chr5:7616221-7619961 REVERSE LENGTH=978	Alanine--tRNA ligase OS=Heliobacterium modesticaldum (strain ATCC 51547 / Ice1) GN=alaS PE=3 SV=1	Cytoplasmic; Chloroplast;	25.8934	26.0381	26.2821	25.8308	25.8281	25.9523	25.3159	25.1797	25.0733	25.7672	25.8845	25.4491	11	13.1	109.67	5.667	-0.181974	0	25.602
Pg_S2791.8	homoserine kinase	AT2G17265.1	Q8L7R2	AT2G17265.1 | Symbols: HSK, DMR1 | homoserine kinase | chr2:7508606-7509718 FORWARD LENGTH=370	Homoserine kinase OS=Arabidopsis thaliana GN=HSK PE=1 SV=1	Chloroplast;	25.6241	25.2756	25.2646	25.2278	25.7264	25.2382	26.1301	26.2272	26.1815	24.948	25.0449	24.9347	5	30.6	36.752	7.411	0.254391	0	27.82
Pg_S2796.1	SAD1/UNC-84 domain protein 1	AT5G04990.1	Q558Z2	AT5G04990.1 | Symbols: SUN1, ATSUN1 | SAD1/UNC-84 domain protein 1 | chr5:1471698-1473770 REVERSE LENGTH=471	Sun domain-containing protein 1 OS=Dictyostelium discoideum GN=sun1 PE=1 SV=1	Chloroplast;	27.0058	27.1837	26.9967	25.5368	25.718	25.6731	26.498	26.1	26.6109	25.8386	25.7096	25.5082	4	13.3	43.018	8.687	-0.382412	0	16.677
Pg_S5425.10	Nucleoside diphosphate kinase family protein	AT4G09320.1	Q8RBR5	AT4G09320.1 | Symbols: NDPK1 | Nucleoside diphosphate kinase family protein | chr4:5923424-5924366 FORWARD LENGTH=169	Nucleoside diphosphate kinase OS=Thermoanaerobacter tengcongensis (strain DSM 15242 / JCM 11007 / NBRC 100824 / MB4) GN=ndk PE=3 SV=1	Cytoplasmic; Chloroplast;	28.7121	28.6651	28.6607	31.7796	31.8002	31.6893	31.3233	31.3833	31.4002	31.5441	31.5112	31.5387	5	80.4	16.253	6.417	-0.0162162	0	310.35
Pg_S2797.3	Hyaluronan / mRNA binding family	AT4G17520.1	-	AT4G17520.1 | Symbols: | Hyaluronan / mRNA binding family | chr4:9771496-9773313 FORWARD LENGTH=360	-	Nuclear;	28.5138	28.6829	28.5273	26.1572	26.1833	26.4931	28.2435	28.2678	28.2343	26.8179	26.5986	26.6931	2	30.6	39.48	5.614	-1.22927	0	81.378
Pg_S2798.19	photosystem I subunit G	AT1G55670.1	P36886	AT1G55670.1 | Symbols: PSAG | photosystem I subunit G | chr1:20802874-20803356 REVERSE LENGTH=160	Photosystem I reaction center subunit psaK, chloroplastic OS=Hordeum vulgare GN=PSAK PE=1 SV=1	Plasmamembrane;	23.6523	23.635	23.3189	29.0035	28.2151	28.3419	30.2994	30.2501	30.1419	24.1268	23.4811	24.0295	4	23.6	16.028	8.971	0.00405405	0	45.347
Pg_S2803.16	glycosyl hydrolase 9C1	unknown	unknown	unknown	unknown	Extracellular;	28.2932	28.3005	28.3487	27.0784	27.0233	27.0888	27.4367	27.2885	27.5858	27.2435	27.1211	26.9039	3	23.3	112.9	7.439	-0.38998	0	26.337
Pg_S2803.8	Pentatricopeptide repeat (PPR) superfamily protein	AT3G48250.1	Q9STK5	AT3G48250.1 | Symbols: | Pentatricopeptide repeat (PPR) superfamily protein | chr3:17870064-17871929 REVERSE LENGTH=621	Pentatricopeptide repeat-containing protein At3g48250, chloroplastic OS=Arabidopsis thaliana GN=At3g48250 PE=2 SV=1	Plasmamembrane; Cytoplasmic; Mitochondrial	30.0359	30.1087	30.1696	29.1416	29.0228	28.9058	28.3673	28.7685	28.3097	29.3039	29.5908	29.3082	3	16.7	89.426	7.49	0.0507917	0	130.41
Pg_S2805.19	glutamine synthetase 2	AT5G35630.1	Q60182	AT5G35630.1 | Symbols: GS2, GLN2, ATGSL1 | glutamine synthetase 2 | chr5:13831220-13833239 FORWARD LENGTH=430	Glutamine synthetase OS=Methanocaldococcus jannaschii (strain ATCC 43067 / DSM 2661 / JAL-1 / JCM 10045 / NBRC 100440) GN=glnA PE=3 SV=1	Cytoplasmic; Chloroplast;	33.2342	33.1183	33.1807	31.5099	31.3935	31.6008	31.5753	31.5197	31.6818	31.0056	31.0711	31.4012	6	62.3	47.691	6.336	-0.463194	0	323.31
Pg_S2819.15	2-cysteine peroxiredoxin B	AT5G06290.1	P44411	AT5G06290.1 | Symbols: 2-Cys Prx B, 2CPB | 2-cysteine peroxiredoxin B | chr5:1919380-1921211 FORWARD LENGTH=273	Putative peroxiredoxin bcp OS=Haemophilus influenzae (strain ATCC 51907 / DSM 11121 / KW20 / Rd) GN=bcp PE=3 SV=1	Chloroplast;	30.1726	30.305	30.0738	33.7255	33.676	33.6023	31.6876	31.6174	31.7138	33.1985	33.1114	33.3873	2	59.3	29.471	7.793	-0.0645522	0	323.31
Pg_S2819.22	ubiquitin E2 variant 1D-4	AT3G52560.4	P53152	AT3G52560.4 | Symbols: UEV1D-4 | ubiquitin E2 variant 1D-4 | chr3:19494678-19495954 REVERSE LENGTH=164	Ubiquitin-conjugating enzyme variant MMS2 OS=Saccharomyces cerevisiae (strain ATCC 204508 / S288c) GN=MMS2 PE=1 SV=1	Cytoplasmic; Nuclear;	27.6558	27.6207	27.4654	27.4177	27.2278	26.9857	27.5483	27.6956	27.6272	27.0153	27.1119	26.9895	2	78.1	16.605	6.245	-0.617123	0	36.543
Pg_S2826.22	Thiamine pyrophosphate dependent pyruvate decarboxylase family protein	AT4G33070.1	Q41769	AT4G33070.1 | Symbols: | Thiamine pyrophosphate dependent pyruvate decarboxylase family protein | chr4:15952519-15954676 REVERSE LENGTH=607	Acetolactate synthase 2, chloroplastic OS=Zea mays GN=ALS2 PE=3 SV=1	Cytoplasmic; Chloroplast;	29.3412	28.93	28.9134	28.3775	28.219	28.3394	27.7277	27.6578	27.7574	28.0117	28.1387	28.0993	4	26	82.277	4.981	-0.00461133	0	61.698
Pg_S2829.3	NAD(P)-linked oxidoreductase superfamily protein	AT1G59960.1	P78736	AT1G59960.1 | Symbols: | NAD(P)-linked oxidoreductase superfamily protein | chr1:22071410-22073067 REVERSE LENGTH=326	NAD(P)H-dependent D-xylose reductase OS=Pachysolen tannophilus GN=XYL1 PE=1 SV=1	Cytoplasmic; Chloroplast;	27.2784	27.1001	27.0486	29.0727	29.0697	29.1442	29.9466	30.0688	30.0279	28.8521	28.9385	28.8038	3	59.7	59.355	6.155	-0.279592	0	323.31
Pg_S2835.3	ENTH/ANTH/VHS superfamily protein	AT4G32285.1	Q9C502	AT4G32285.1 | Symbols: | ENTH/ANTH/VHS superfamily protein | chr4:15586003-15587910 FORWARD LENGTH=635	Putative clathrin assembly protein At1g33340 OS=Arabidopsis thaliana GN=At1g33340 PE=2 SV=1	Cytoplasmic; Nuclear;	26.2436	26.337	26.6899	25.5183	25.3471	25.5923	26.8967	26.6625	26.6277	25.2203	25.7559	25.462	5	7	116.94	6.673	-0.301041	0	16.63
Pg_S2854.8	glutathione-disulfide reductase	AT3G24170.1	P08655	AT3G24170.1 | Symbols: ATGR1, GR1 | glutathione-disulfide reductase | chr3:8729762-8734115 REVERSE LENGTH=499	Uncharacterized 19.7 kDa protein in mercuric resistance operon OS=Staphylococcus aureus PE=4 SV=1	Cytoplasmic; Chloroplast;	28.0018	27.8547	27.9136	28.9978	29.0539	28.899	28.3815	28.4069	28.2989	28.7836	28.6886	28.2083	2	40.2	53.56	5.875	-0.0535354	0	131.22
Pg_S2855.6	long-chain acyl-CoA synthetase 7	AT5G27600.1	P17814	AT5G27600.1 | Symbols: LACS7, ATLACS7 | long-chain acyl-CoA synthetase 7 | chr5:9742616-9746795 FORWARD LENGTH=700	Probable 4-coumarate--CoA ligase 1 OS=Oryza sativa subsp. japonica GN=4CL1 PE=2 SV=2	Plasmamembrane; Cytoplasmic;	27.0855	27.2285	27.1339	26.4656	26.7824	26.8726	26.0568	26.2708	26.475	26.7661	26.7729	26.743	13	14.2	149.4	6.544	-0.0735207	0	49.823
Pg_S2873.13	chloroplast ribosomal protein S4	ATCG00380.1	P48270	ATCG00380.1 | Symbols: RPS4 | chloroplast ribosomal protein S4 | chrC:45223-45828 REVERSE LENGTH=201	30S ribosomal protein S4, chloroplastic OS=Chlamydomonas reinhardtii GN=rps4 PE=1 SV=1	Mitochondrial; Nuclear;	26.2675	25.8899	27.7102	26.4342	26.7794	26.5326	28.1879	28.2379	27.8298	27.8192	27.8666	28.2031	9	49.3	23.312	10.957	-0.619403	0	100.7
Pg_S2891.16	phosphoglycerate kinase	AT1G79550.1	O83549	AT1G79550.1 | Symbols: PGK | phosphoglycerate kinase | chr1:29924347-29926295 REVERSE LENGTH=401	Phosphoglycerate kinase OS=Treponema pallidum (strain Nichols) GN=pgk PE=3 SV=1	Cytoplasmic; Chloroplast;	25.5541	25.5446	25.3932	28.8911	28.8436	28.8916	28.3899	28.2338	28.3262	28.9391	29.0176	29.038	2	69.1	42.171	6.335	0.130175	0	147.88
Pg_S2891.3	Phosphoglycerate kinase family protein	AT1G56190.1	P68897	AT1G56190.1 | Symbols: | Phosphoglycerate kinase family protein | chr1:21028403-21030454 FORWARD LENGTH=478	Phosphoglycerate kinase OS=Streptococcus pyogenes serotype M1 GN=pgk PE=3 SV=2	Cytoplasmic; Chloroplast;	31.5957	31.5469	31.2649	34.3448	34.4067	34.4245	33.2269	33.2556	33.242	34.2398	34.1296	34.298	6	68.4	52.804	4.9	-0.0583673	0	323.31
Pg_S2898.19	aconitase 3	AT2G05710.1	P07264	AT2G05710.1 | Symbols: ACO3 | aconitase 3 | chr2:2141591-2146350 FORWARD LENGTH=990	3-isopropylmalate dehydratase OS=Saccharomyces cerevisiae (strain ATCC 204508 / S288c) GN=LEU1 PE=1 SV=3	Cytoplasmic; Mitochondrial; Chloroplast	30.493	30.2358	30.1409	30.0855	29.9457	30.133	29.1449	29.0924	29.1936	29.5822	29.7921	29.82	4	46	109.1	6.941	-0.160639	0	323.31
Pg_S5569.2	regulatory particle AAA-ATPase 2A	AT4G29040.1	C6VKW6	AT4G29040.1 | Symbols: RPT2a | regulatory particle AAA-ATPase 2A | chr4:14312369-14314386 FORWARD LENGTH=443	ATP-dependent zinc metalloprotease FtsH OS=Lactobacillus plantarum (strain JDM1) GN=ftsH PE=3 SV=1	Cytoplasmic;	27.6446	27.9994	27.5337	29.272	28.8629	29.0172	28.1336	28.1218	27.9489	28.8642	28.6997	28.6413	14	43.6	49.442	5.868	-0.460497	0	147.19
Pg_S3484.5	20S proteasome alpha subunit E2	AT3G14290.1	Q8PTU1	AT3G14290.1 | Symbols: PAE2 | 20S proteasome alpha subunit E2 | chr3:4764364-4766381 FORWARD LENGTH=237	Proteasome subunit alpha OS=Methanosarcina mazei (strain ATCC BAA-159 / DSM 3647 / Goe1 / Go1 / JCM 11833 / OCM 88) GN=psmA PE=3 SV=1	Cytoplasmic; Chloroplast;	27.2589	27.1964	27.3805	28.2154	28.1448	28.1423	27.6355	27.6673	27.5029	28.8257	28.6196	28.7795	9	51.9	25.98	4.556	-0.230802	0	145.97
Pg_S2920.26	pectin methylesterase 3	AT3G14310.1	P17407	AT3G14310.1 | Symbols: ATPME3, PME3 | pectin methylesterase 3 | chr3:4772214-4775095 REVERSE LENGTH=592	21 kDa protein OS=Daucus carota PE=2 SV=1	Mitochondrial;	30.8009	30.9061	30.9834	30.1145	29.9356	30.1057	30.4955	30.4802	30.6911	30.1239	29.9982	30.1136	7	33.2	63.521	9.033	-0.195214	0	323.31
Pg_S2924.15	UDP-D-apiose/UDP-D-xylose synthase 2	AT1G08200.1	Q9LZI2	AT1G08200.1 | Symbols: AXS2 | UDP-D-apiose/UDP-D-xylose synthase 2 | chr1:2574259-2576609 REVERSE LENGTH=389	UDP-glucuronic acid decarboxylase 2 OS=Arabidopsis thaliana GN=UXS2 PE=1 SV=1	Cytoplasmic;	26.805	25.9492	25.7832	27.5538	27.6381	27.6291	27.5514	27.5095	27.2528	27.6661	27.5729	27.626	2	50.5	43.441	5.522	-0.282902	0	103.12
Pg_S2924.17	Nucleotidylyl transferase superfamily protein	AT3G04600.1	Q9YA64	AT3G04600.1 | Symbols: | Nucleotidylyl transferase superfamily protein | chr3:1243152-1245958 FORWARD LENGTH=402	Tyrosine--tRNA ligase OS=Aeropyrum pernix (strain ATCC 700893 / DSM 11879 / JCM 9820 / NBRC 100138 / K1) GN=tyrS PE=1 SV=1	Cytoplasmic;	25.3938	25.7066	25.6236	25.9934	25.8917	26.2344	26.1856	26.6193	26.4987	26.131	25.3279	25.6259	3	24.2	45.33	6.126	-0.31775	0	56.689
Pg_S2953.17	pyruvate dehydrogenase complex E1 alpha subunit	AT1G59900.1	Q5SLR4	AT1G59900.1 | Symbols: AT-E1 ALPHA, E1 ALPHA | pyruvate dehydrogenase complex E1 alpha subunit | chr1:22051368-22053660 FORWARD LENGTH=389	2-oxoisovalerate dehydrogenase subunit alpha OS=Thermus thermophilus (strain HB8 / ATCC 27634 / DSM 579) GN=TTHA0229 PE=1 SV=1	Mitochondrial;	30.2248	30.1771	30.0812	29.5058	29.4061	29.2869	28.7324	28.6012	28.9429	29.2212	29.0871	29.0261	12	33.4	43.213	6.814	-0.319898	0	69.201
Pg_S2971.19	ATP citrate lyase subunit B 2	AT5G49460.1	Q94522	AT5G49460.1 | Symbols: ACLB-2 | ATP citrate lyase subunit B 2 | chr5:20055048-20058195 FORWARD LENGTH=608	Succinyl-CoA ligase [ADP/GDP-forming] subunit alpha, mitochondrial OS=Drosophila melanogaster GN=Scsalpha PE=2 SV=3	Cytoplasmic; Mitochondrial; Chloroplast	25.1705	25.1961	24.8532	25.3316	25.272	25.6983	26.0756	25.3206	25.4493	25.3419	25.7745	25.8336	4	51	66.052	6.818	-0.03125	0	12.004
Pg_S2980.3	FtsH extracellular protease family	AT5G42270.1	Q9SSB4	AT5G42270.1 | Symbols: VAR1, FTSH5 | FtsH extracellular protease family | chr5:16902659-16905102 FORWARD LENGTH=704	26S protease regulatory subunit 7 homolog B OS=Arabidopsis thaliana GN=RPT1B PE=1 SV=2	Chloroplast;	30.4321	30.4844	30.4899	31.4341	31.6349	31.5738	31.4522	31.4608	31.4716	31.6808	31.6337	31.685	5	60.6	74.269	5.688	-0.0929088	0	323.31
Pg_S2982.1	aldehyde dehydrogenase 7B4	AT1G54100.1	B1K708	AT1G54100.1 | Symbols: ALDH7B4 | aldehyde dehydrogenase 7B4 | chr1:20195435-20198853 REVERSE LENGTH=508	NAD/NADP-dependent betaine aldehyde dehydrogenase OS=Burkholderia cenocepacia (strain MC0-3) GN=betB PE=3 SV=1	Plasmamembrane; Cytoplasmic; Chloroplast	30.0284	30.0795	30.1365	28.7294	28.7076	28.8228	27.9305	28.2414	27.7809	28.5376	28.4921	28.5419	14	45.6	55.318	5.364	0.0789474	0	93.458
Pg_S2982.10	gamma subunit of Mt ATP synthase	AT2G33040.1	Q87KA7	AT2G33040.1 | Symbols: ATP3 | gamma subunit of Mt ATP synthase | chr2:14018978-14021047 REVERSE LENGTH=325	ATP synthase gamma chain OS=Vibrio parahaemolyticus serotype O3:K6 (strain RIMD 2210633) GN=atpG PE=3 SV=1	Mitochondrial; Chloroplast;	27.1886	27.3629	27.3329	29.2621	29.1468	29.1306	28.1923	28.2314	28.0949	29.2874	29.3699	29.2523	1	38	35.214	9.164	-0.191277	0	61.907
Pg_S2991.16	pfkB-like carbohydrate kinase family protein	AT5G58730.1	-	AT5G58730.1 | Symbols: | pfkB-like carbohydrate kinase family protein | chr5:23723627-23725324 REVERSE LENGTH=353	-	Cytoplasmic; Chloroplast;	26.0154	25.9437	25.6666	27.5831	27.7395	27.6969	27.5579	27.472	27.586	27.0106	27.2651	27.2275	10	60.4	33.496	5.126	-0.0773463	0	76.453
Pg_S2993.2	Lipase/lipooxygenase, PLAT/LH2 family protein	AT2G22170.1	-	AT2G22170.1 | Symbols: | Lipase/lipooxygenase, PLAT/LH2 family protein | chr2:9427010-9427742 REVERSE LENGTH=183	-	Extracellular;	32.394	32.2713	32.3531	30.3897	30.3634	30.3364	29.9354	29.7169	30.0666	30.2735	30.289	30.3008	2	39.5	23.206	5.41	-0.0757143	0	184.04
Pg_S2995.3	Ribosomal protein L2 family	AT4G36130.1	A2SPK6	AT4G36130.1 | Symbols: | Ribosomal protein L2 family | chr4:17097613-17098656 FORWARD LENGTH=258	50S ribosomal protein L2 OS=Methanocorpusculum labreanum (strain ATCC 43576 / DSM 4855 / Z) GN=rpl2 PE=3 SV=1	Cytoplasmic; Mitochondrial;	29.1089	30.0368	30.7246	28.3734	28.3068	27.6982	30.0741	29.9694	29.6229	25.8253	27.766	27.8343	1	38.1	28.143	11.264	-0.504615	0	98.662
Pg_S3017.6	serine transhydroxymethyltransferase 1	AT4G37930.1	A7FFW1	AT4G37930.1 | Symbols: SHM1, STM, SHMT1 | serine transhydroxymethyltransferase 1 | chr4:17831891-17834742 REVERSE LENGTH=517	Serine hydroxymethyltransferase OS=Yersinia pseudotuberculosis serotype O:1b (strain IP 31758) GN=glyA PE=3 SV=1	Cytoplasmic; Mitochondrial;	28.1332	28.524	28.3564	29.4496	29.4805	29.4003	29.2767	29.1764	29.3753	30.1764	29.5674	29.518	1	65.7	56.645	8.346	-0.227096	0	178.1
Pg_S3018.21	dolichyl-diphosphooligosaccharide-protein glycosyltransferase 48kDa subunit family protein	AT5G66680.1	P33767	AT5G66680.1 | Symbols: DGL1 | dolichyl-diphosphooligosaccharide-protein glycosyltransferase 48kDa subunit family protein | chr5:26617840-26620581 REVERSE LENGTH=437	Dolichyl-diphosphooligosaccharide--protein glycosyltransferase subunit WBP1 OS=Saccharomyces cerevisiae (strain ATCC 204508 / S288c) GN=WBP1 PE=1 SV=1	Plasmamembrane;	22.9201	23.193	23.5416	25.2767	26.5686	25.7468	24.3496	24.4669	24.9219	25.0448	26.0616	26.1614	1	11.6	83.207	5.827	0.163228	0	22.016
Pg_S3022.27	Plastid-lipid associated protein PAP / fibrillin family protein	AT2G46910.1	Q8W4F1	AT2G46910.1 | Symbols: | Plastid-lipid associated protein PAP / fibrillin family protein | chr2:19272427-19273856 FORWARD LENGTH=284	Probable plastid-lipid-associated protein 10, chloroplastic OS=Arabidopsis thaliana GN=PAP10 PE=2 SV=1	Chloroplast; Nuclear;	31.5896	31.0277	31.2081	30.3685	30.1528	30.0855	27.664	27.5373	27.8983	30.0321	29.979	29.5743	9	26.1	40.358	4.397	-0.344565	0	86.733
Pg_S3024.19	Ribosomal protein L30/L7 family protein	AT3G13580.3	A5UL67	AT3G13580.3 | Symbols: | Ribosomal protein L30/L7 family protein | chr3:4433809-4435109 FORWARD LENGTH=244	50S ribosomal protein L30P OS=Methanobrevibacter smithii (strain PS / ATCC 35061 / DSM 861) GN=rpl30p PE=3 SV=1	Cytoplasmic; Mitochondrial; Nuclear	25.6153	25.2703	25.4519	26.715	26.9456	26.7516	27.298	26.4022	27.0761	29.1197	28.7384	29.072	1	51.6	28.5	10.27	-0.511382	0	59.777
Pg_S3025.3	vacuolar ATP synthase subunit A	AT1G78900.1	P41009	AT1G78900.1 | Symbols: VHA-A | vacuolar ATP synthase subunit A | chr1:29660463-29664575 FORWARD LENGTH=623	ATP synthase subunit beta OS=Bacillus caldotenax GN=atpD PE=3 SV=1	Cytoplasmic; Chloroplast;	31.7124	31.8479	31.7374	31.5471	31.7047	31.5826	30.8564	30.8217	30.8234	31.6327	31.5696	31.4671	1	66.9	78.34	5.156	-0.179155	0	323.31
Pg_S3026.2	transducin family protein / WD-40 repeat family protein	AT4G33270.1	Q5IS43	AT4G33270.1 | Symbols: CDC20.1 | Transducin family protein / WD-40 repeat family protein | chr4:16044545-16046590 REVERSE LENGTH=457	Platelet-activating factor acetylhydrolase IB subunit alpha OS=Pan troglodytes GN=PAFAH1B1 PE=2 SV=3	Plasmamembrane; Nuclear;	29.957	30.2057	30.0943	28.1592	28.1297	28.1606	28.1882	28.2646	28.1699	28.2843	27.9732	28.0915	4	27.6	120.56	4.875	-0.326505	0	151.3
Pg_S3027.13	glutamate decarboxylase	AT5G17330.1	A6VIC0	AT5G17330.1 | Symbols: GAD, GAD1 | glutamate decarboxylase | chr5:5711141-5714839 FORWARD LENGTH=502	L-tyrosine decarboxylase OS=Methanococcus maripaludis (strain C7 / ATCC BAA-1331) GN=mfnA PE=3 SV=1	Cytoplasmic;	30.8111	30.5661	30.5917	31.2915	31.2076	31.4631	30.2061	30.1535	29.9762	31.1864	31.1074	31.1017	2	53.8	56.056	5.603	-0.199194	0	323.31
Pg_S3034.3	glycine-rich RNA-binding protein 3	AT5G61030.1	P17133	AT5G61030.1 | Symbols: GR-RBP3 | glycine-rich RNA-binding protein 3 | chr5:24560870-24562152 FORWARD LENGTH=309	U1 small nuclear ribonucleoprotein 70 kDa OS=Drosophila melanogaster GN=snRNP-U1-70K PE=1 SV=2	Nuclear;	29.1087	28.4815	28.8062	27.2798	27.0049	27.2085	29.3509	29.2948	29.2427	26.5698	26.0731	26.3169	2	19.3	23.836	4.39	-0.739474	0	148.05
Pg_S3045.2	DNAJ homologue 2	AT5G22060.1	P59910	AT5G22060.1 | Symbols: ATJ2, J2 | DNAJ homologue 2 | chr5:7303798-7305668 REVERSE LENGTH=419	DnaJ homolog subfamily B member 13 OS=Homo sapiens GN=DNAJB13 PE=2 SV=1	Nuclear;	26.6992	27.1153	27.1121	24.4611	24.2093	24.253	25.2273	25.2073	25.2223	24.6143	24.1951	24.2077	4	32.9	46.396	6.051	-0.773861	0	21.473
Pg_S3048.11	ribophorin II (RPN2) family protein	AT4G21150.1	Q9DBG6	AT4G21150.1 | Symbols: HAP6 | ribophorin II (RPN2) family protein | chr4:11278646-11283599 FORWARD LENGTH=691	Dolichyl-diphosphooligosaccharide--protein glycosyltransferase subunit 2 OS=Mus musculus GN=Rpn2 PE=2 SV=1	Plasmamembrane;	26.6174	26.679	26.5014	27.584	27.7052	27.6082	27.4062	27.7514	27.8254	27.7139	27.7729	27.7551	1	30.2	82.67	6	0.233641	0	126.51
Pg_S4137.2	photosystem I light harvesting complex gene 1	AT3G54890.1	P08963	AT3G54890.1 | Symbols: LHCA1 | photosystem I light harvesting complex gene 1 | chr3:20339706-20340922 REVERSE LENGTH=241	Chlorophyll a-b binding protein 2, chloroplastic OS=Hordeum vulgare GN=CAB2 PE=3 SV=1	Chloroplast;	26.9959	27.2751	26.9816	29.2241	29.4306	29.8554	30.9164	30.9239	30.7537	28.3733	28.1227	28.5375	6	24.2	26.362	6.107	-0.0913934	0	44.567
Pg_S3064.27	Tubulin/FtsZ family protein	AT4G14960.2	P28551	AT4G14960.2 | Symbols: TUA6 | Tubulin/FtsZ family protein | chr4:8548769-8550319 REVERSE LENGTH=450	Tubulin beta chain (Fragment) OS=Glycine max GN=TUBB PE=1 SV=2	Cytoplasmic;	30.0537	30.1825	30.4731	29.8318	29.8584	29.5133	32.3269	32.2334	32.1893	29.4854	29.5411	29.4484	1	65.1	49.482	4.704	-0.192889	0	323.31
Pg_S3064.8	Pyridoxal phosphate (PLP)-dependent transferases superfamily protein	AT1G43710.1	Q9CG20	AT1G43710.1 | Symbols: emb1075 | Pyridoxal phosphate (PLP)-dependent transferases superfamily protein | chr1:16486534-16488298 REVERSE LENGTH=482	Glutamate decarboxylase OS=Lactococcus lactis subsp. lactis (strain IL1403) GN=gadB PE=1 SV=1	Mitochondrial;	28.771	28.9018	28.5861	28.8449	28.9491	29.0819	28.9337	28.9649	28.8418	29.098	28.8326	28.9145	2	45.3	50.944	6.926	-0.138841	0	157.26
Pg_S3073.10	CONTAINS InterPro DOMAIN/s: Mediator complex subunit Med28 (InterPro:IPR021640); BEST Arabidopsis thaliana protein match is: unknown protein (TAIR:AT3G01670.1); Has 122 Blast hits to 112 proteins in 13 species: Archae - 0; Bacteria - 0; Meta	unknown	unknown	unknown	unknown	Plasmamembrane; Nuclear;	28.8712	28.837	28.7002	28.8937	28.7937	28.9458	29.5345	29.505	29.4063	28.9064	28.8111	28.9094	8	30.3	159.65	6.27	-0.220214	0	190.23
Pg_S3073.11	31-kDa RNA binding protein	AT4G24770.1	Q925G0	AT4G24770.1 | Symbols: RBP31, ATRBP31, CP31, ATRBP33 | 31-kDa RNA binding protein | chr4:12766223-12767952 REVERSE LENGTH=329	Putative RNA-binding protein 3 OS=Rattus norvegicus GN=Rbm3 PE=1 SV=2	Chloroplast;	24.7587	25.1266	24.6104	28.8989	28.9807	28.8727	30.7064	30.5852	30.544	29.2228	29.118	29.2101	2	48	33.728	4.607	-0.521854	0	286.61
Pg_S3075.8	Translation elongation factor EF1B, gamma chain	AT1G09640.1	Q9VG96	AT1G09640.1 | Symbols: | Translation elongation factor EF1B, gamma chain | chr1:3120162-3122152 FORWARD LENGTH=414	Glutathione S-transferase D4 OS=Drosophila melanogaster GN=GstD4 PE=1 SV=1	Cytoplasmic;	27.1641	27.6022	27.2545	28.7035	28.7262	28.7256	27.6287	27.7453	27.5769	28.7381	28.752	28.8608	9	34.7	48.037	5.395	-0.345843	0	93.275
Pg_S3077.2	diaminopimelate epimerase family protein	AT3G53580.1	A1AWJ5	AT3G53580.1 | Symbols: | diaminopimelate epimerase family protein | chr3:19864784-19866907 FORWARD LENGTH=362	Diaminopimelate epimerase OS=Ruthia magnifica subsp. Calyptogena magnifica GN=dapF PE=1 SV=1	Cytoplasmic;	28.1298	28.4095	27.8448	26.9032	27.019	26.8972	27.4975	27.3614	27.7755	26.6283	26.8336	26.8998	11	45.6	33.681	4.756	-0.155049	0	66.22
Pg_S7351.1	Tic22-like family protein	AT5G62650.1	-	AT5G62650.1 | Symbols: | Tic22-like family protein | chr5:25152873-25155872 REVERSE LENGTH=529	-	Mitochondrial; Chloroplast;	25.1919	24.5302	24.7603	26.283	26.3204	25.9735	25.399	25.4516	25.5063	25.4563	25.3641	25.249	3	13.5	30.57	9.582	-0.141455	0	6.4249
Pg_S3083.17	Cyclase family protein	AT4G35220.1	Q2T0N2	AT4G35220.1 | Symbols: | Cyclase family protein | chr4:16752636-16753966 FORWARD LENGTH=272	Kynurenine formamidase OS=Burkholderia thailandensis (strain E264 / ATCC 700388 / DSM 13276 / CIP 106301) GN=kynB PE=3 SV=2	Cytoplasmic; Chloroplast;	30.8005	30.7756	30.6865	28.5518	28.8598	28.3392	27.4207	26.943	27.2683	29.1403	29.0659	28.8902	7	41.5	31.221	5.225	0.137589	0	54.278
Pg_S3083.4	poly(A) binding protein 8	AT1G49760.1	Q8TBY0	AT1G49760.1 | Symbols: PAB8, PABP8 | poly(A) binding protein 8 | chr1:18416740-18419753 FORWARD LENGTH=671	Probable RNA-binding protein 46 OS=Homo sapiens GN=RBM46 PE=2 SV=1	Cytoplasmic; Nuclear;	29.5733	29.7492	29.6201	28.2895	28.1125	28.4409	28.7697	28.7437	28.7362	28.2726	28.2468	28.2103	2	38.3	70.337	7.414	-0.425816	0	125.19
Pg_S3085.4	tripeptidyl peptidase ii	AT4G20850.1	Q09541	AT4G20850.1 | Symbols: TPP2 | tripeptidyl peptidase ii | chr4:11160935-11169889 REVERSE LENGTH=1380	Tripeptidyl-peptidase 2 OS=Caenorhabditis elegans GN=tpp-2 PE=2 SV=1	Cytoplasmic; Nuclear;	30.7669	30.8865	30.9701	28.7214	28.7415	28.8899	28.2479	28.353	28.2638	28.7442	29.0204	28.9769	6	45.3	144.18	5.697	-0.347248	0	242.51
Pg_S3087.1	Ribonuclease T2 family protein	AT1G14210.1	Q7SID5	AT1G14210.1 | Symbols: | Ribonuclease T2 family protein | chr1:4856902-4857941 REVERSE LENGTH=247	Ribonuclease S-F11 OS=Nicotiana alata PE=1 SV=1	Extracellular; Plasmamembrane;	32.8804	32.3415	32.5703	29.9411	30.0359	29.5489	30.4399	30.3798	30.2787	29.7556	29.3598	29.6033	3	23	24.713	7.683	-0.0518018	0	58.783
Pg_S3087.2	ribonuclease 1	AT2G02990.1	Q02933	AT2G02990.1 | Symbols: RNS1, ATRNS1 | ribonuclease 1 | chr2:873714-874667 FORWARD LENGTH=230	Ribonuclease T2-like OS=Saccharomyces cerevisiae (strain ATCC 204508 / S288c) GN=RNY1 PE=1 SV=1	Extracellular; Plasmamembrane;	24.7029	24.8009	28.0175	26.2982	26.1119	24.3848	28.5765	28.6832	28.5974	27.3499	26.0935	25.7566	1	10.8	24.704	7.697	0.0346847	0	5.7246
Pg_S3092.15	Aldolase superfamily protein	AT1G69740.1	Q59295	AT1G69740.1 | Symbols: HEMB1 | Aldolase superfamily protein | chr1:26232197-26234713 FORWARD LENGTH=430	Delta-aminolevulinic acid dehydratase (Fragment) OS=Clostridium josui GN=hemB PE=3 SV=1	Mitochondrial; Chloroplast;	24.8702	24.3425	24.4439	27.3446	27.2623	27.6394	26.4003	26.6139	26.3025	28.2273	28.0959	27.7601	9	17.2	60.955	6.418	-0.219963	0	56.65
Pg_S3094.24	plant uncoupling mitochondrial protein 1	AT3G54110.1	P31167	AT3G54110.1 | Symbols: ATPUMP1, UCP, PUMP1, ATUCP1, UCP1 | plant uncoupling mitochondrial protein 1 | chr3:20038890-20040996 FORWARD LENGTH=306	ADP,ATP carrier protein 1, mitochondrial OS=Arabidopsis thaliana GN=AAC1 PE=1 SV=2	Mitochondrial; Chloroplast;	25.8496	25.4514	25.7561	27.0007	26.9156	27.0862	25.8437	25.8518	26.1037	26.8817	26.7474	26.9977	7	29.8	33.682	9.939	0.196825	0	25.642
Pg_S3098.28	Proteasome component (PCI) domain protein	AT5G45620.1	A1DC62	AT5G45620.1 | Symbols: | Proteasome component (PCI) domain protein | chr5:18501590-18503868 FORWARD LENGTH=386	Eukaryotic translation initiation factor 3 subunit M OS=Neosartorya fischeri (strain ATCC 1020 / DSM 3700 / FGSC A1164 / NRRL 181) GN=NFIA_024940 PE=3 SV=1	Cytoplasmic;	24.6882	24.6765	24.9951	27.3002	26.793	27.4951	26.213	26.1254	26.2198	27.6903	27.6166	27.0683	2	21.5	44.403	5.087	-0.0580311	0	27.682
Pg_S3098.31	phosphoribulokinase	AT1G32060.1	P19824	AT1G32060.1 | Symbols: PRK | phosphoribulokinase | chr1:11532668-11534406 FORWARD LENGTH=395	Phosphoribulokinase, chloroplastic OS=Chlamydomonas reinhardtii GN=PRKA PE=1 SV=1	Cytoplasmic;	30.812	30.9012	30.6738	32.2098	32.0612	32.2037	31.941	31.9647	31.9545	31.9075	31.9682	31.8648	2	64.8	36.971	4.94	-0.31303	0	323.31
Pg_S3112.16	GTP binding Elongation factor Tu family protein	AT5G60390.1	A1UBL1	AT5G60390.1 | Symbols: | GTP binding Elongation factor Tu family protein | chr5:24289226-24290675 FORWARD LENGTH=449	Elongation factor Tu OS=Mycobacterium sp. (strain KMS) GN=tuf PE=3 SV=1	Cytoplasmic;	29.3712	29.6777	28.7512	29.1567	29.9606	29.1426	29.8136	29.7988	29.7333	30.2693	29.6152	30.5587	1	47.7	49.412	9.131	-0.312249	0	45.888
Pg_S3119.11	rubisco activase	AT2G39730.1	O28972	AT2G39730.1 | Symbols: RCA | rubisco activase | chr2:16570951-16573345 REVERSE LENGTH=474	Cell division cycle protein 48 homolog AF_1297 OS=Archaeoglobus fulgidus (strain ATCC 49558 / VC-16 / DSM 4304 / JCM 9628 / NBRC 100126) GN=AF_1297 PE=3 SV=1	Cytoplasmic; Chloroplast;	34.7639	34.6936	34.8386	33.6479	33.4119	34.3214	33.0473	33.0122	32.9086	32.9728	32.9846	32.9838	2	32.9	27.783	6.478	-0.428514	0	323.31
Pg_S3138.2	FAD/NAD(P)-binding oxidoreductase family protein	AT1G58440.1	P52019	AT1G58440.1 | Symbols: XF1, SQE1 | FAD/NAD(P)-binding oxidoreductase family protein | chr1:21714094-21717246 REVERSE LENGTH=531	Squalene monooxygenase OS=Mus musculus GN=Sqle PE=2 SV=1	Chloroplast;	27.006	27.1809	26.7634	27.7366	27.8168	27.7664	27.6711	27.6285	27.6526	27.7831	27.657	27.6974	14	35.8	51.732	6.052	-0.0345912	0	46.533
Pg_S3140.3	thioredoxin M-type 4	AT3G15360.1	P85801	AT3G15360.1 | Symbols: ATHM4, TRX-M4, ATM4 | thioredoxin M-type 4 | chr3:5188448-5189457 FORWARD LENGTH=193	Thioredoxin H-type OS=Populus jackii PE=1 SV=1	Chloroplast;	28.1016	27.5516	27.7809	29.4432	29.4257	29.2952	28.1816	28.0966	28.3412	29.5032	29.3011	29.3544	2	43.3	20.418	8.559	0.0486631	0	33.401
Pg_S3142.6	Sulfite exporter TauE/SafE family protein	AT2G36630.1	-	AT2G36630.1 | Symbols: | Sulfite exporter TauE/SafE family protein | chr2:15352767-15355050 REVERSE LENGTH=459	-	Plasmamembrane;	26.9147	27.5822	27.1829	26.1995	26.2306	26.2706	28.4535	28.483	28.0295	26.8447	26.7927	26.4993	2	7.1	73.632	10.187	0.219578	0	20.512
Pg_S3155.9	Tautomerase/MIF superfamily protein	AT3G51660.1	P81748	AT3G51660.1 | Symbols: | Tautomerase/MIF superfamily protein | chr3:19164229-19165076 REVERSE LENGTH=112	Macrophage migration inhibitory factor homolog OS=Trichuris trichiura PE=1 SV=2	Cytoplasmic; Chloroplast;	29.3408	28.7498	29.2766	29.3439	29.01	29.661	28.3198	28.3862	28.3079	28.8111	28.9525	28.9582	5	32.6	19.486	6.907	-0.110112	0	75.66
Pg_S3171.4	FAD-binding Berberine family protein	AT4G20840.1	P93762	AT4G20840.1 | Symbols: | FAD-binding Berberine family protein | chr4:11157916-11159535 FORWARD LENGTH=539	Hexose oxidase OS=Chondrus crispus GN=HOX PE=1 SV=2	Plasmamembrane;	32.3041	32.1808	32.1861	30.2157	30.2077	30.3088	33.0164	33.0384	32.9633	30.1513	30.1827	30.132	7	62.2	60.585	8.555	0.000185185	0	323.31
Pg_S3173.3	glutamate dehydrogenase 1	AT5G18170.1	Q9USN5	AT5G18170.1 | Symbols: GDH1 | glutamate dehydrogenase 1 | chr5:6006172-6008248 FORWARD LENGTH=411	Probable NAD-specific glutamate dehydrogenase OS=Schizosaccharomyces pombe (strain 972 / ATCC 24843) GN=gdh2 PE=3 SV=1	Cytoplasmic; Mitochondrial;	27.299	27.4989	27.3821	28.5051	28.5107	28.5082	27.5953	27.5425	27.3731	28.5738	28.6243	28.515	7	56	44.403	5.699	-0.115572	0	96.106
Pg_S3176.1	Zinc-binding dehydrogenase family protein	AT5G37980.1	Q9C0Y6	AT5G37980.1 | Symbols: | Zinc-binding dehydrogenase family protein | chr5:15131405-15132940 FORWARD LENGTH=353	Zinc-type alcohol dehydrogenase-like protein PB24D3.08c OS=Schizosaccharomyces pombe (strain 972 / ATCC 24843) GN=SPAPB24D3.08c PE=3 SV=1	Cytoplasmic; Chloroplast;	27.7816	27.6186	27.9222	28.4363	28.5048	28.507	27.1399	27.2557	27.1632	28.4771	28.3203	28.394	10	51.6	38.017	6.399	-0.0638484	0	44.367
Pg_S3181.5	NAD(P)-binding Rossmann-fold superfamily protein	AT1G30620.1	Q31FG4	AT1G30620.1 | Symbols: HSR8, MUR4, UXE1 | NAD(P)-binding Rossmann-fold superfamily protein | chr1:10855496-10857970 FORWARD LENGTH=419	ADP-L-glycero-D-manno-heptose-6-epimerase OS=Thiomicrospira crunogena (strain XCL-2) GN=hldD PE=3 SV=1	Mitochondrial; Chloroplast;	24.4756	25.4841	25.1191	28.4698	28.3761	28.3631	28.787	28.9154	29.1991	28.3357	28.3962	27.9768	9	52	42.091	9.268	-0.0196429	0	76.025
Pg_S3187.18	FAD/NAD(P)-binding oxidoreductase	AT1G15140.1	O85675	AT1G15140.1 | Symbols: | FAD/NAD(P)-binding oxidoreductase | chr1:5210403-5212137 REVERSE LENGTH=295	Anthranilate 1,2-dioxygenase electron transfer component OS=Acinetobacter baylyi (strain ATCC 33305 / BD413 / ADP1) GN=antC PE=1 SV=1	Mitochondrial; Chloroplast;	29.4119	29.4051	29.4236	28.2038	28.2483	28.2434	28.5595	28.1767	28.3241	28.1625	28.3227	28.3537	10	52.9	32.418	7.938	-0.106397	0	114.46
Pg_S3205.7	dehydroascorbate reductase 2	AT1G75270.1	Q9CNB0	AT1G75270.1 | Symbols: DHAR2 | dehydroascorbate reductase 2 | chr1:28250255-28251237 REVERSE LENGTH=213	Stringent starvation protein A homolog OS=Pasteurella multocida (strain Pm70) GN=sspA PE=3 SV=1	Cytoplasmic;	28.2892	28.5215	28.3362	29.0675	29.0797	29.1133	28.7433	28.734	28.7785	29.0392	28.9441	28.9332	2	82.2	23.431	5.104	-0.0953052	0	69.727
Pg_S3226.20	fumarylacetoacetase, putative	AT1G12050.1	Q00770	AT1G12050.1 | Symbols: | fumarylacetoacetase, putative | chr1:4072904-4075856 FORWARD LENGTH=421	Fumarylacetoacetase OS=Emericella nidulans (strain FGSC A4 / ATCC 38163 / CBS 112.46 / NRRL 194 / M139) GN=fahA PE=1 SV=3	Cytoplasmic;	27.8452	27.9036	27.1576	26.8009	26.6742	26.604	25.7097	25.7363	25.7093	26.57	26.3154	26.7123	2	27.8	43.076	5.611	-0.191646	0	31.089
Pg_S3226.22	rubisco activase	AT2G39730.1	O28972	AT2G39730.1 | Symbols: RCA | rubisco activase | chr2:16570951-16573345 REVERSE LENGTH=474	Cell division cycle protein 48 homolog AF_1297 OS=Archaeoglobus fulgidus (strain ATCC 49558 / VC-16 / DSM 4304 / JCM 9628 / NBRC 100126) GN=AF_1297 PE=3 SV=1	Chloroplast;	35.6066	35.3759	35.6708	34.5542	34.6568	34.6892	35.7256	35.727	35.5845	34.456	34.4489	34.561	7	70.6	51.554	5.582	-0.340254	0	323.31
Pg_S3250.1	Aldolase-type TIM barrel family protein	AT5G13420.1	Q255E4	AT5G13420.1 | Symbols: | Aldolase-type TIM barrel family protein | chr5:4302080-4304212 REVERSE LENGTH=438	Transaldolase OS=Chlamydophila felis (strain Fe/C-56) GN=tal PE=3 SV=1	Peroxisomal;	25.1189	25.3088	24.0704	28.3148	28.7112	28.3388	26.8098	26.7142	27.0846	27.9544	27.7285	27.8815	2	61.5	40.565	9.198	-0.0143631	0	40.938
Pg_S3264.10	Adaptin family protein	AT1G31730.1	Q80V94	AT1G31730.1 | Symbols: | Adaptin family protein | chr1:11359907-11363916 FORWARD LENGTH=938	AP-4 complex subunit epsilon-1 OS=Mus musculus GN=Ap4e1 PE=2 SV=3	Golgi; Nuclear;	27.57	27.803	27.6689	25.4022	26.4675	25.6712	26.3232	25.9929	25.9413	26.3685	25.4908	25.2224	13	16.5	105.17	5.781	-0.222869	0	43.679
Pg_S3264.2	Peptidase M1 family protein	AT1G63770.5	Q2GY21	AT1G63770.5 | Symbols: | Peptidase M1 family protein | chr1:23657791-23664243 REVERSE LENGTH=1013	Leukotriene A-4 hydrolase homolog OS=Chaetomium globosum (strain ATCC 6205 / CBS 148.51 / DSM 1962 / NBRC 6347 / NRRL 1970) GN=CHGG_07133 PE=3 SV=1	Cytoplasmic; Nuclear;	32.0567	31.9597	32.0448	32.0788	32.0572	32.028	31.7034	31.6945	31.6931	31.8585	31.8062	31.8285	15	73.7	109.22	5.758	-0.32345	0	323.31
Pg_S3276.2	N-terminal nucleophile aminohydrolases (Ntn hydrolases) superfamily protein	AT5G08100.1	B4GHE3	AT5G08100.1 | Symbols: | N-terminal nucleophile aminohydrolases (Ntn hydrolases) superfamily protein | chr5:2593242-2594586 REVERSE LENGTH=315	L-asparaginase-like protein GL17509 OS=Drosophila persimilis GN=GL17509 PE=3 SV=1	Cytoplasmic; Mitochondrial; Chloroplast	28.0292	28.1253	28.0901	29.1279	28.9728	29.1528	28.9033	29.037	28.9941	28.7223	28.8221	28.6663	2	66	25.638	5.634	-0.195319	0	76.349
Pg_S3277.15	Tyrosyl-tRNA synthetase, class Ib, bacterial/mitochondrial	AT3G02660.1	B8D726	AT3G02660.1 | Symbols: emb2768 | Tyrosyl-tRNA synthetase, class Ib, bacterial/mitochondrial | chr3:570221-571756 REVERSE LENGTH=511	Tyrosine--tRNA ligase OS=Buchnera aphidicola subsp. Acyrthosiphon pisum (strain Tuc7) GN=tyrS PE=3 SV=1	Chloroplast;	25.0174	24.8551	25.1188	26.9333	26.8043	27.1738	25.0302	25.2919	25.3818	26.9596	27.2015	26.7753	2	17.8	53.294	6.701	-0.127178	0	17.15
Pg_S3289.2	Ribosomal protein S4	AT5G39850.1	P49214	AT5G39850.1 | Symbols: | Ribosomal protein S4 | chr5:15950053-15951171 FORWARD LENGTH=197	40S ribosomal protein S9 (Fragment) OS=Nicotiana tabacum GN=RPS9 PE=2 SV=1	Cytoplasmic; Nuclear;	25.8287	25.7187	25.962	26.3558	26.0567	25.7919	26.854	27.1084	26.2721	28.8514	28.8284	28.8347	3	41.6	22.982	10.665	-0.709645	0	76.567
Pg_S3296.1	Peroxidase superfamily protein	AT4G33420.1	Q42580	AT4G33420.1 | Symbols: | Peroxidase superfamily protein | chr4:16084856-16086105 FORWARD LENGTH=325	Peroxidase 21 OS=Arabidopsis thaliana GN=PER21 PE=1 SV=1	Extracellular; Cytoplasmic;	29.4916	29.6017	29.4765	27.9164	27.9743	27.8489	28.8195	28.7672	28.6994	28.0765	28.1026	27.9699	12	46.4	37.451	5.041	-0.131195	0	148.68
Pg_S3296.4	Peroxidase superfamily protein	AT4G33420.1	Q42580	AT4G33420.1 | Symbols: | Peroxidase superfamily protein | chr4:16084856-16086105 FORWARD LENGTH=325	Peroxidase 21 OS=Arabidopsis thaliana GN=PER21 PE=1 SV=1	Extracellular;	34.4537	34.4497	34.4037	32.5698	32.5617	32.4979	30.2082	30.2012	30.0213	32.7174	32.5355	32.3916	12	40.3	38.975	7.213	-0.0940845	0	323.31
Pg_S3297.1	Clathrin, heavy chain	AT3G11130.1	Q10161	AT3G11130.1 | Symbols: | Clathrin, heavy chain | chr3:3482575-3491667 REVERSE LENGTH=1705	Probable clathrin heavy chain OS=Schizosaccharomyces pombe (strain 972 / ATCC 24843) GN=chc1 PE=1 SV=1	Cytoplasmic;	30.6897	30.5406	30.6702	31.0727	31.1314	31.2078	31.382	31.387	31.2586	30.9627	31.0762	31.1145	1	57.5	192.07	5.054	-0.141284	0	323.31
Pg_S3303.4	catalase 2	AT4G35090.1	Q73WB6	AT4G35090.1 | Symbols: CAT2 | catalase 2 | chr4:16700937-16703215 REVERSE LENGTH=492	Catalase-related peroxidase OS=Mycobacterium paratuberculosis (strain ATCC BAA-968 / K-10) GN=MAP_2744c PE=1 SV=1	Peroxisomal;	35.2209	34.9428	35.0357	34.9754	35.0399	35.0791	33.1171	33.1803	33.1096	34.6487	34.6476	34.7894	8	47	119.35	6.717	-0.516699	0	323.31
Pg_S3309.15	aldehyde dehydrogenase 2C4	AT3G24503.1	Q66I21	AT3G24503.1 | Symbols: ALDH2C4, ALDH1A, REF1 | aldehyde dehydrogenase 2C4 | chr3:8919732-8923029 REVERSE LENGTH=501	Aldehyde dehydrogenase family 8 member A1 OS=Danio rerio GN=aldh8a1 PE=2 SV=1	Cytoplasmic;	25.7042	25.9005	25.6168	29.2573	28.4701	28.3636	26.7977	26.8501	26.052	27.7957	28.0387	27.5852	1	30.4	54.823	6.054	-0.0456349	0	49.16
Pg_S3313.15	Lactoylglutathione lyase / glyoxalase I family protein	AT1G80160.1	Q9LFQ4	AT1G80160.1 | Symbols: | Lactoylglutathione lyase / glyoxalase I family protein | chr1:30151101-30151930 FORWARD LENGTH=167	Pentatricopeptide repeat-containing protein At5g15010, mitochondrial OS=Arabidopsis thaliana GN=At5g15010 PE=2 SV=2	Cytoplasmic; Chloroplast;	27.3199	27.3185	27.3537	25.0144	25.0823	25.1266	28.0964	27.9761	27.9504	25.857	25.7356	25.8156	3	78.7	17.398	4.616	-0.0945122	0	19.022
Pg_S3332.21	hydroxypyruvate reductase	AT1G68010.2	P13443	AT1G68010.2 | Symbols: HPR | hydroxypyruvate reductase | chr1:25493418-25495720 FORWARD LENGTH=387	Glycerate dehydrogenase OS=Cucumis sativus GN=HPR-A PE=2 SV=1	Cytoplasmic;	31.2249	31.3206	31.3222	32.5384	32.4885	32.5809	30.6804	30.5856	30.6798	32.6118	32.623	32.7177	7	54.3	59.867	5.159	-0.0928177	0	306.1
Pg_S3336.5	NAD(P)-binding Rossmann-fold superfamily protein	AT1G30620.1	Q31FG4	AT1G30620.1 | Symbols: HSR8, MUR4, UXE1 | NAD(P)-binding Rossmann-fold superfamily protein | chr1:10855496-10857970 FORWARD LENGTH=419	ADP-L-glycero-D-manno-heptose-6-epimerase OS=Thiomicrospira crunogena (strain XCL-2) GN=hldD PE=3 SV=1	Mitochondrial;	27.2143	26.8056	26.902	28.4163	27.6861	28.4341	25.7064	25.8294	25.8389	27.7112	27.4677	27.7885	5	41.5	34.514	9.113	-0.167089	0	31.918
Pg_S3338.1	rotamase CYP 4	AT3G62030.2	Q9C566	AT3G62030.2 | Symbols: ROC4 | rotamase CYP 4 | chr3:22973004-22975139 FORWARD LENGTH=313	Peptidyl-prolyl cis-trans isomerase CYP40 OS=Arabidopsis thaliana GN=CYP40 PE=2 SV=1	Extracellular;	26.6919	26.5792	26.7225	25.2576	25.7324	25.2245	27.0108	27.1666	27.3705	25.1703	25.2113	25.4194	2	16	25.883	6.911	-0.201266	0	15.723
Pg_S3338.7	transducin family protein / WD-40 repeat family protein	AT4G33270.1	Q5IS43	AT4G33270.1 | Symbols: CDC20.1 | Transducin family protein / WD-40 repeat family protein | chr4:16044545-16046590 REVERSE LENGTH=457	Platelet-activating factor acetylhydrolase IB subunit alpha OS=Pan troglodytes GN=PAFAH1B1 PE=2 SV=3	Extracellular;	29.0416	28.6735	28.7333	26.9567	27.2507	27.4676	26.8574	26.9222	26.9199	26.6251	26.8915	26.6861	6	42.7	32.582	5.785	-0.248344	0	47.027
Pg_S3339.14	carbamoyl phosphate synthetase B	AT1G29900.1	O93937	AT1G29900.1 | Symbols: CARB | carbamoyl phosphate synthetase B | chr1:10468164-10471976 FORWARD LENGTH=1187	Protein pyrABCN OS=Emericella nidulans (strain FGSC A4 / ATCC 38163 / CBS 112.46 / NRRL 194 / M139) GN=pyrABCN PE=3 SV=2	Cytoplasmic; Chloroplast;	29.5094	29.1816	29.3698	28.2993	28.1585	28.2226	27.927	27.704	28.1018	28.027	28.2347	28.3434	2	26.2	131.46	5.164	-0.115167	0	163.71
Pg_S5931.1	FKBP-like peptidyl-prolyl cis-trans isomerase family protein	AT2G43560.1	O22870	AT2G43560.1 | Symbols: | FKBP-like peptidyl-prolyl cis-trans isomerase family protein | chr2:18073995-18075385 REVERSE LENGTH=223	Peptidyl-prolyl cis-trans isomerase FKBP16-3, chloroplastic OS=Arabidopsis thaliana GN=FKBP16-3 PE=1 SV=2	Cytoplasmic; Mitochondrial;	27.3259	27.2818	27.3162	25.8478	26.0772	25.9617	26.833	27.097	26.5355	25.7126	25.7396	25.8341	6	35.8	23.995	8.506	-0.55566	0	38.275
Pg_S3340.1	RNA-binding (RRM/RBD/RNP motifs) family protein	AT4G14300.1	Q6GLB5	AT4G14300.1 | Symbols: | RNA-binding (RRM/RBD/RNP motifs) family protein | chr4:8231179-8232785 FORWARD LENGTH=411	ELAV-like protein 1 OS=Xenopus tropicalis GN=elavl1 PE=2 SV=1	Chloroplast; Nuclear;	25.2623	25.2725	24.8176	26.7305	26.9993	27.0677	28.7775	28.8358	28.5635	27.2891	27.004	26.756	3	36.8	35.419	4.815	-0.38522	0	88.262
Pg_S3341.2	HEAT SHOCK PROTEIN 89.1	AT3G07770.1	A1VYN0	AT3G07770.1 | Symbols: Hsp89.1, AtHsp90.6, AtHsp90-6 | HEAT SHOCK PROTEIN 89.1 | chr3:2479611-2483970 FORWARD LENGTH=799	Chaperone protein HtpG OS=Campylobacter jejuni subsp. jejuni serotype O:23/36 (strain 81-176) GN=htpG PE=3 SV=1	Cytoplasmic; Nuclear;	27.9757	28.2073	28.4574	28.6369	28.7963	28.8225	28.6961	28.5694	28.8673	28.849	28.775	28.6763	4	46.1	90.566	5.106	-0.575503	0	142
Pg_S3363.2	poly(A) binding protein 8	AT1G49760.1	Q8TBY0	AT1G49760.1 | Symbols: PAB8, PABP8 | poly(A) binding protein 8 | chr1:18416740-18419753 FORWARD LENGTH=671	Probable RNA-binding protein 46 OS=Homo sapiens GN=RBM46 PE=2 SV=1	Cytoplasmic; Chloroplast; Nuclear	29.4814	29.2837	29.1051	28.1549	28.2891	28.1154	28.9252	28.8827	28.9041	28.412	28.2182	28.3076	2	36.6	71.425	6.591	-0.352287	0	132.12
Pg_S3366.2	methylthioadenosine nucleosidase 1	AT4G38800.1	Q7XA67	AT4G38800.1 | Symbols: ATMTN1, ATMTAN1, MTN1, MTAN1 | methylthioadenosine nucleosidase 1 | chr4:18113355-18114996 REVERSE LENGTH=267	5'-methylthioadenosine/S-adenosylhomocysteine nucleosidase 2 OS=Arabidopsis thaliana GN=MTN2 PE=1 SV=1	Extracellular; Cytoplasmic;	27.6786	27.6466	27.9127	26.5666	26.7893	26.9922	27.3848	27.5513	27.663	26.6444	26.3046	26.4958	1	41.6	27.595	4.446	0.198855	0	50.138
Pg_S3372.2	MLP-like protein 31	AT1G70840.1	Q93VR4	AT1G70840.1 | Symbols: MLP31 | MLP-like protein 31 | chr1:26713170-26714014 REVERSE LENGTH=171	MLP-like protein 423 OS=Arabidopsis thaliana GN=MLP423 PE=2 SV=1	Cytoplasmic;	24.7258	24.7492	24.33	25.7817	26.3776	26.0279	28.1503	28.3425	28.105	26.6079	26.2543	26.6587	1	47	16.851	4.884	-0.227815	0	133.58
Pg_S3378.10	sucrose phosphate synthase 1F	AT5G20280.1	P49034	AT5G20280.1 | Symbols: ATSPS1F, SPS1F | sucrose phosphate synthase 1F | chr5:6844994-6849997 REVERSE LENGTH=1043	Sucrose synthase OS=Alnus glutinosa GN=SUS1 PE=2 SV=1	Cytoplasmic; Nuclear;	27.1353	27.2492	26.9567	27.1352	26.9415	27.0873	27.5926	27.4927	27.4234	25.9091	26.187	26.1355	12	19.3	117.9	6.314	-0.422814	0	45.918
Pg_S4521.4	Inorganic H pyrophosphatase family protein	AT1G15690.1	Q93AR9	AT1G15690.1 | Symbols: AVP1, ATAVP3, AVP-3, AtVHP1;1 | Inorganic H pyrophosphatase family protein | chr1:5399115-5402185 FORWARD LENGTH=770	Pyrophosphate-energized proton pump 2 (Fragment) OS=Mycoplana dimorpha GN=hppA2 PE=3 SV=1	Plasmamembrane;	26.3486	26.3191	26.9928	28.9035	28.2756	28.665	28.1781	28.166	28.313	27.5756	27.8466	27.8717	4	26	80.186	4.985	0.593856	0	59.074
Pg_S3394.17	ATP citrate lyase subunit B 2	AT5G49460.1	Q94522	AT5G49460.1 | Symbols: ACLB-2 | ATP citrate lyase subunit B 2 | chr5:20055048-20058195 FORWARD LENGTH=608	Succinyl-CoA ligase [ADP/GDP-forming] subunit alpha, mitochondrial OS=Drosophila melanogaster GN=Scsalpha PE=2 SV=3	Cytoplasmic; Mitochondrial; Chloroplast	28.9212	28.9176	28.9682	29.1032	29.0513	28.9593	29.9134	29.8078	29.878	28.9776	29.007	28.8719	2	53.3	65.937	7.268	-0.0297697	0	323.31
Pg_S3422.5	uridine 5&apos;-monophosphate synthase / UMP synthase (PYRE-F) (UMPS)	unknown	unknown	unknown	unknown	Cytoplasmic; Chloroplast;	25.744	25.9445	25.9759	26.4092	26.7975	26.6963	26.5337	26.4816	26.4946	26.7904	26.5753	26.8385	2	43	33.972	8.516	-0.0557325	0	87.825
Pg_S3422.6	uridine 5&apos;-monophosphate synthase / UMP synthase (PYRE-F) (UMPS)	unknown	unknown	unknown	unknown	Cytoplasmic; Chloroplast;	26.2469	26.2721	26.0399	27.4465	27.4262	27.4939	26.6816	26.45	26.6465	27.0669	26.932	27.17	1	26.4	38.199	5.422	0.142816	0	57.801
Pg_S3423.1	monodehydroascorbate reductase 1	AT3G52880.2	Q6D8S1	AT3G52880.2 | Symbols: ATMDAR1, MDAR1 | monodehydroascorbate reductase 1 | chr3:19601477-19604366 REVERSE LENGTH=466	Nitric oxide reductase FlRd-NAD(+) reductase OS=Pectobacterium atrosepticum (strain SCRI 1043 / ATCC BAA-672) GN=norW PE=3 SV=1	Cytoplasmic; Chloroplast;	28.247	28.043	28.143	28.3299	28.5953	28.3595	28.2928	28.2898	28.1905	28.3397	28.2564	28.2056	3	73.3	47.147	6.064	-0.0582949	0	23.064
Pg_S3427.17	20S proteasome subunit PAA2	AT2G05840.1	O27270	AT2G05840.1 | Symbols: PAA2 | 20S proteasome subunit PAA2 | chr2:2234226-2236053 FORWARD LENGTH=246	Proteasome subunit beta OS=Methanothermobacter thermautotrophicus (strain ATCC 29096 / DSM 1053 / JCM 10044 / NBRC 100330 / Delta H) GN=psmB PE=3 SV=1	Cytoplasmic; Mitochondrial;	27.7136	27.8159	27.5789	29.1313	29.19	29.1618	29.04	29.1288	28.9287	29.4784	29.2772	29.2551	1	67.1	27.329	6.23	-0.273984	0	199.98
Pg_S3431.9	beta glucosidase 13	AT5G44640.1	O52629	AT5G44640.1 | Symbols: BGLU13 | beta glucosidase 13 | chr5:18011146-18012669 FORWARD LENGTH=507	Beta-galactosidase OS=Pyrococcus woesei PE=1 SV=1	Unknown	29.2981	29.3475	29.3207	30.1966	30.514	30.4283	29.4445	29.7383	29.8868	30.5744	30.4415	30.4913	17	48.5	62.533	6.694	-0.404918	0	144.11
Pg_S3448.3	synaptotagmin A	AT2G20990.3	P47708	AT2G20990.3 | Symbols: SYTA | synaptotagmin A | chr2:9014827-9017829 FORWARD LENGTH=579	Rabphilin-3A OS=Mus musculus GN=Rph3a PE=1 SV=2	Cytoplasmic;	26.1312	25.9871	26.7565	27.5643	27.2533	27.5064	27.2437	25.0058	25.7748	29.0256	28.5468	28.6852	5	22.3	87.879	7.413	-0.24242	0	93.788
Pg_S3490.6	Serine protease inhibitor (SERPIN) family protein	AT1G47710.1	Q6P734	AT1G47710.1 | Symbols: | Serine protease inhibitor (SERPIN) family protein | chr1:17558271-17560061 FORWARD LENGTH=391	Plasma protease C1 inhibitor OS=Rattus norvegicus GN=Serping1 PE=2 SV=1	Cytoplasmic; Mitochondrial;	25.6812	25.4868	25.344	27.7621	27.5546	27.2364	28.1188	28.1265	28.076	27.1764	27.4068	27.4148	12	45	38.722	6.543	-0.039255	0	64.66
Pg_S4167.3	20S proteasome beta subunit D1	AT3G22630.1	A3DN21	AT3G22630.1 | Symbols: PBD1, PRCGB | 20S proteasome beta subunit D1 | chr3:8009709-8010774 REVERSE LENGTH=204	Proteasome subunit beta 1 OS=Staphylothermus marinus (strain ATCC 43588 / DSM 3639 / F1) GN=psmB1 PE=3 SV=1	Cytoplasmic; Mitochondrial;	25.9839	26.0549	26.3641	28.9597	28.8991	28.8183	28.6755	28.6906	28.6702	28.8413	28.7863	28.7205	1	56.9	22.492	5.98	0.0833333	0	31.134
Pg_S3535.2	ADP glucose pyrophosphorylase large subunit 1	AT5G19220.1	Q9CHN1	AT5G19220.1 | Symbols: ADG2, APL1 | ADP glucose pyrophosphorylase large subunit 1 | chr5:6463931-6466775 REVERSE LENGTH=522	Glucose-1-phosphate adenylyltransferase OS=Lactococcus lactis subsp. lactis (strain IL1403) GN=glgC PE=3 SV=1	Mitochondrial; Chloroplast;	24.4825	24.9809	24.7132	26.062	25.9769	26.0041	25.7536	26.0282	26.7612	26.1952	25.9737	25.6026	1	55	57.722	8.875	-0.160153	0	63.227
Pg_S3535.7	Thioredoxin superfamily protein	AT2G37240.1	Q6PBP3	AT2G37240.1 | Symbols: | Thioredoxin superfamily protein | chr2:15640235-15641720 REVERSE LENGTH=248	Redox-regulatory protein FAM213A OS=Danio rerio GN=fam213a PE=2 SV=2	Extracellular; Chloroplast;	29.5451	29.3899	29.4139	29.0372	28.8568	28.9793	29.7859	29.6477	29.3385	29.8789	30.0218	30.1416	1	43.1	23.922	9.741	-0.391284	0	162.73
Pg_S3541.6	proteasome beta subunit C1	AT1G21720.1	Q55D66	AT1G21720.1 | Symbols: PBC1 | proteasome beta subunit C1 | chr1:7626394-7628070 FORWARD LENGTH=204	Proteasome subunit beta type-3 OS=Dictyostelium discoideum GN=psmB3 PE=3 SV=1	Extracellular; Plasmamembrane; Cytoplasmic	26.6517	26.6543	26.8924	28.7379	28.3118	28.2793	27.3748	27.3103	27.1822	28.2657	28.1405	28.2669	6	47.5	22.795	4.961	-0.0357843	0	149.66
Pg_S4930.12	cyclophilin 5	AT2G29960.1	Q5HHD1	AT2G29960.1 | Symbols: CYP5, ATCYP5, CYP19-4 | cyclophilin 5 | chr2:12769183-12770528 REVERSE LENGTH=201	Putative peptidyl-prolyl cis-trans isomerase OS=Staphylococcus aureus (strain COL) GN=SACOL0957 PE=3 SV=1	Cytoplasmic; Mitochondrial;	29.1895	29.2966	29.195	28.4807	28.5806	28.2653	28.7811	28.8351	28.8446	27.812	27.8991	27.6623	7	46.6	22.262	9.88	-0.100481	0	122.19
Pg_S3554.17	lumazine-binding family protein	AT2G20690.1	P21578	AT2G20690.1 | Symbols: | lumazine-binding family protein | chr2:8923342-8924621 FORWARD LENGTH=271	Yellow fluorescent protein OS=Aliivibrio fischeri GN=luxY PE=1 SV=1	Cytoplasmic; Chloroplast;	26.3621	26.5223	27.04	28.2387	27.6389	27.6958	27.8096	27.5411	27.7969	27.8942	28.1638	27.8168	6	33.9	30.684	7.064	0.0260714	0	26.941
Pg_S3581.10	calcium sensing receptor	AT5G23060.1	Q9FN48	AT5G23060.1 | Symbols: CaS | calcium sensing receptor | chr5:7736760-7738412 REVERSE LENGTH=387	Calcium sensing receptor, chloroplastic OS=Arabidopsis thaliana GN=CAS PE=1 SV=1	Nuclear;	28.7466	28.8588	28.8371	30.6703	30.5354	30.3052	28.6047	28.7234	28.8203	30.4782	30.2356	30.3396	13	18	105.47	9.065	-0.0446561	0	151.16
Pg_S3582.10	RNA-binding (RRM/RBD/RNP motifs) family protein	AT4G14300.1	Q6GLB5	AT4G14300.1 | Symbols: | RNA-binding (RRM/RBD/RNP motifs) family protein | chr4:8231179-8232785 FORWARD LENGTH=411	ELAV-like protein 1 OS=Xenopus tropicalis GN=elavl1 PE=2 SV=1	Nuclear;	26.3461	26.5462	26.6244	23.6412	23.6607	24.3378	27.6871	27.6849	27.2331	23.759	23.5584	23.2467	2	36.6	45.771	7.149	-0.672247	0	45.154
Pg_S3584.22	phospholipase D delta	AT4G35790.1	Q9LTG5	AT4G35790.1 | Symbols: ATPLDDELTA, PLDDELTA | phospholipase D delta | chr4:16955774-16959875 REVERSE LENGTH=868	Callose synthase 4 OS=Arabidopsis thaliana GN=CALS4 PE=3 SV=2	Cytoplasmic;	27.0068	27.3672	27.6391	27.1608	27.3214	27.1455	27.431	27.3383	27.6619	26.9662	26.8634	26.7112	4	24.7	96.396	6.534	-0.378353	0	89.101
Pg_S3610.15	aconitase 3	AT2G05710.1	P07264	AT2G05710.1 | Symbols: ACO3 | aconitase 3 | chr2:2141591-2146350 FORWARD LENGTH=990	3-isopropylmalate dehydratase OS=Saccharomyces cerevisiae (strain ATCC 204508 / S288c) GN=LEU1 PE=1 SV=3	Mitochondrial; Nuclear;	29.1651	29.1511	29.1814	28.8919	29.0701	28.953	28.6336	28.5173	28.3836	29.0306	29.0481	29.0998	1	29.8	169.97	8.197	-0.469961	0	53.074
Pg_S3613.11	starch branching enzyme 2.2	AT5G03650.1	Q2A4U7	AT5G03650.1 | Symbols: SBE2.2 | starch branching enzyme 2.2 | chr5:931924-937470 FORWARD LENGTH=805	1,4-alpha-glucan branching enzyme GlgB OS=Francisella tularensis subsp. holarctica (strain LVS) GN=glgB PE=3 SV=1	Cytoplasmic;	28.0044	27.7522	27.8582	27.5984	27.8077	27.7288	26.3846	26.3994	27.6019	27.9688	27.9641	27.7793	15	19.7	117.54	5.94	-0.398071	0	56.39
Pg_S3613.4	catalase 2	AT4G35090.1	Q73WB6	AT4G35090.1 | Symbols: CAT2 | catalase 2 | chr4:16700937-16703215 REVERSE LENGTH=492	Catalase-related peroxidase OS=Mycobacterium paratuberculosis (strain ATCC BAA-968 / K-10) GN=MAP_2744c PE=1 SV=1	Peroxisomal;	32.1257	31.5417	31.5064	31.9827	32.0306	31.7006	30.6934	30.5875	30.5411	31.6466	31.6103	31.3729	4	61.9	52.121	6.743	-0.449339	0	84.89
Pg_S3615.1	pyrophosphorylase 6	AT5G09650.1	Q6KZB3	AT5G09650.1 | Symbols: AtPPa6, PPa6 | pyrophosphorylase 6 | chr5:2991331-2993117 REVERSE LENGTH=300	Inorganic pyrophosphatase OS=Picrophilus torridus (strain ATCC 700027 / DSM 9790 / JCM 10055 / NBRC 100828) GN=ppa PE=3 SV=1	Cytoplasmic; Chloroplast;	24.7964	25.7493	24.1906	28.7124	28.5582	28.3149	28.9015	29.2053	29.137	29.3111	29.5733	29.4463	10	44.8	33.025	5.796	-0.328283	0	58.882
Pg_S3622.8	lipoxygenase 2	AT3G45140.1	Q8GSM3	AT3G45140.1 | Symbols: LOX2, ATLOX2 | lipoxygenase 2 | chr3:16525437-16529233 FORWARD LENGTH=896	Lipoxygenase 2.2, chloroplastic OS=Hordeum vulgare GN=LOX2.2 PE=1 SV=1	Cytoplasmic;	30.613	30.6747	30.7048	31.0788	31.0861	31.0846	32.2468	32.0648	32.2556	31.4284	31.493	31.3517	30	60.5	97.827	5.852	-0.417321	0	323.31
Pg_S3628.11	phosphoenolpyruvate carboxylase 3	AT3G14940.1	Q9A871	AT3G14940.1 | Symbols: ATPPC3, PPC3 | phosphoenolpyruvate carboxylase 3 | chr3:5025584-5029476 FORWARD LENGTH=968	Phosphoenolpyruvate carboxylase OS=Caulobacter crescentus (strain ATCC 19089 / CB15) GN=ppc PE=3 SV=1	Cytoplasmic;	29.3423	29.134	29.2596	30.068	30.1801	30.1183	29.3913	29.4133	29.5534	30.2715	30.1783	30.097	11	45.5	110.3	5.952	-0.396888	0	215.6
Pg_S3629.11	phragmoplast orienting kinesin 2	AT3G19050.1	Q9ULI4	AT3G19050.1 | Symbols: POK2 | phragmoplast orienting kinesin 2 | chr3:6578047-6590106 FORWARD LENGTH=2771	Kinesin-like protein KIF26A OS=Homo sapiens GN=KIF26A PE=2 SV=3	Cytoplasmic; Nuclear;	27.0798	27.1307	27.0733	27.6555	27.585	28.0306	27.5699	27.5598	27.4298	27.8058	27.5612	27.6054	13	5.6	406.86	5.008	-0.496685	0	63.192
Pg_S3643.7	chaperonin 20	AT5G20720.1	Q5LAF5	AT5G20720.1 | Symbols: CPN20, CPN10, CHCPN10, ATCPN21, CPN21 | chaperonin 20 | chr5:7015015-7016354 FORWARD LENGTH=253	10 kDa chaperonin OS=Bacteroides fragilis (strain ATCC 25285 / NCTC 9343) GN=groS PE=3 SV=1	Chloroplast;	29.4605	29.1687	29.3561	29.0928	29.4705	29.1487	31.0889	30.6145	30.8439	29.1514	29.3221	29.1509	2	54.1	27.072	7.065	-0.0942085	0	283.7
Pg_S3645.2	glycine decarboxylase P-protein 1	AT4G33010.1	A4WUX2	AT4G33010.1 | Symbols: AtGLDP1, GLDP1 | glycine decarboxylase P-protein 1 | chr4:15926852-15931150 REVERSE LENGTH=1037	Glycine dehydrogenase (decarboxylating) OS=Rhodobacter sphaeroides (strain ATCC 17025 / ATH 2.4.3) GN=gcvP PE=3 SV=1	Mitochondrial;	33.4975	33.2967	33.4912	33.0976	33.1801	33.1919	33.1335	33.1449	33.1227	33.1286	33.0223	33.1307	8	63.7	114.3	6.9	-0.159087	0	323.31
Pg_S3656.5	arginosuccinate synthase family	AT4G24830.1	A5FWI5	AT4G24830.1 | Symbols: | arginosuccinate synthase family | chr4:12793085-12795857 REVERSE LENGTH=494	Argininosuccinate synthase OS=Acidiphilium cryptum (strain JF-5) GN=argG PE=3 SV=1	Chloroplast;	27.3046	27.315	27.3229	27.4956	27.6431	27.5926	27.3696	27.4494	27.3418	27.9143	27.8226	27.8697	12	27.2	53.947	5.792	-0.264213	0	47.777
Pg_S3660.9	Ribonuclease T2 family protein	AT1G14210.1	Q7SID5	AT1G14210.1 | Symbols: | Ribonuclease T2 family protein | chr1:4856902-4857941 REVERSE LENGTH=247	Ribonuclease S-F11 OS=Nicotiana alata PE=1 SV=1	Extracellular; Nuclear;	30.3135	29.7615	29.4109	28.6836	28.3615	28.8141	33.0619	32.6772	32.9195	29.3188	29.0973	30.163	9	53.6	31.109	4.047	-0.193165	0	323.31
Pg_S3670.1	kinesin like protein for actin based chloroplast movement 1	AT5G10470.2	Q9FKP4	AT5G10470.2 | Symbols: KAC1 | kinesin like protein for actin based chloroplast movement 1 | chr5:3290121-3297248 REVERSE LENGTH=1274	Kinesin-like protein KCA2 OS=Arabidopsis thaliana GN=KCA2 PE=1 SV=1	Nuclear;	27.0376	27.1793	27.3487	26.4527	26.2235	26.5961	26.7972	26.6626	26.7136	26.217	26.0876	26.1729	4	16.9	143.89	6.257	-0.414253	0	43.857
Pg_S3671.7	Rubisco methyltransferase family protein	AT5G14260.3	-	AT5G14260.3 | Symbols: | Rubisco methyltransferase family protein | chr5:4601139-4603873 FORWARD LENGTH=514	-	Plasmamembrane; Chloroplast;	24.6901	24.6375	24.9253	26.9882	27.0495	27.3273	26.5101	26.6804	26.3819	27.5354	26.6573	26.9657	11	30.2	55.738	4.96	-0.173631	0	62.535
Pg_S3675.13	heat shock protein 60	AT3G23990.1	Q1QDC9	AT3G23990.1 | Symbols: HSP60, HSP60-3B | heat shock protein 60 | chr3:8669013-8672278 FORWARD LENGTH=577	60 kDa chaperonin OS=Psychrobacter cryohalolentis (strain K5) GN=groL PE=3 SV=1	Mitochondrial;	26.8364	26.9915	27.878	28.5344	28.8581	28.4114	27.1549	27.0234	26.9598	28.319	28.4773	28.3584	3	24.4	140.35	6.322	-0.241511	0	57.353
Pg_S5569.8	photosystem I subunit E-2	AT2G20260.1	A8G2Z0	AT2G20260.1 | Symbols: PSAE-2 | photosystem I subunit E-2 | chr2:8736780-8737644 FORWARD LENGTH=145	Photosystem I reaction center subunit IV OS=Prochlorococcus marinus (strain MIT 9215) GN=psaE PE=3 SV=1	Chloroplast;	30.468	29.7025	30.3483	30.7021	30.6576	30.6834	32.1618	32.0877	32.1964	31.4702	31.6032	31.4193	5	44.5	14.627	9.432	-0.210219	0	136.46
Pg_S3677.6	translocon at the inner envelope membrane of chloroplasts 110	AT1G06950.1	O24303	AT1G06950.1 | Symbols: ATTIC110, TIC110 | translocon at the inner envelope membrane of chloroplasts 110 | chr1:2130303-2135563 REVERSE LENGTH=1016	Protein TIC110, chloroplastic OS=Pisum sativum GN=TIC110 PE=1 SV=1	Cytoplasmic;	26.4995	26.3855	26.7099	27.803	27.444	27.4915	28.6897	28.4331	28.8129	27.5196	27.5421	27.5445	5	32.8	102.35	5.339	-0.285157	0	159.31
Pg_S3701.9	Aldolase superfamily protein	AT1G69740.1	Q59295	AT1G69740.1 | Symbols: HEMB1 | Aldolase superfamily protein | chr1:26232197-26234713 FORWARD LENGTH=430	Delta-aminolevulinic acid dehydratase (Fragment) OS=Clostridium josui GN=hemB PE=3 SV=1	Cytoplasmic;	29.4068	29.7165	29.6065	30.3546	30.4574	30.492	31.0048	30.9906	30.8818	30.6563	30.6108	30.5497	3	69.4	40.196	7.824	-0.300538	0	323.31
Pg_S3706.3	-	-	-	-	-	Plasmamembrane; Cytoplasmic;	24.7691	25.2334	25.2176	26.7995	26.9634	26.7443	25.8074	25.9243	26.1026	26.1475	26.0245	25.9394	1	17.9	23.295	8.521	-0.111594	0	19.95
Pg_S3713.22	NmrA-like negative transcriptional regulator family protein	AT4G39230.1	O65679	AT4G39230.1 | Symbols: | NmrA-like negative transcriptional regulator family protein | chr4:18266024-18267604 REVERSE LENGTH=308	Probable pinoresinol-lariciresinol reductase 3 OS=Arabidopsis thaliana GN=PLR3 PE=3 SV=2	Cytoplasmic;	30.5171	30.3812	30.4519	31.4778	31.6519	31.6639	30.1547	30.0927	30.0103	31.1864	31.2777	31.4219	6	62	33.758	5.86	-0.0175325	0	136.3
Pg_S3718.1	xyloglucan endotransglucosylase/hydrolase 7	AT4G37800.1	P32623	AT4G37800.1 | Symbols: XTH7 | xyloglucan endotransglucosylase/hydrolase 7 | chr4:17775703-17777372 REVERSE LENGTH=293	Probable glycosidase CRH2 OS=Saccharomyces cerevisiae (strain ATCC 204508 / S288c) GN=UTR2 PE=1 SV=3	Extracellular; Cytoplasmic;	28.4505	27.9746	28.2566	25.9917	26.4642	26.2017	29.7077	29.7727	29.5584	26.7462	26.5871	26.2254	9	57	32.688	6.081	-0.523077	0	208.78
Pg_S3734.6	catalytics	AT1G74790.1	P75804	AT1G74790.1 | Symbols: | catalytics | chr1:28098912-28101673 FORWARD LENGTH=695	Soluble aldose sugar dehydrogenase YliI OS=Escherichia coli (strain K12) GN=yliI PE=1 SV=1	Plasmamembrane;	27.1101	27.3211	26.7769	27.5741	27.8156	27.8901	27.3414	27.2845	27.2683	27.9788	27.4154	26.9835	3	27.8	110.31	6.339	0.0183756	0	57.244
Pg_S3747.16	UDP-glucose:glycoprotein glucosyltransferases;transferases, transferring hexosyl groups;transferases, transferring glycosyl groups	AT1G71220.2	P22023	AT1G71220.2 | Symbols: EBS1 | UDP-glucose:glycoprotein glucosyltransferases;transferases, transferring hexosyl groups;transferases, transferring glycosyl groups | chr1:26841664-26851730 FORWARD LENGTH=1614	Killer toxin-resistance protein 5 OS=Saccharomyces cerevisiae (strain ATCC 204508 / S288c) GN=KRE5 PE=1 SV=2	Plasmamembrane; Cytoplasmic; Nuclear	30.5272	30.5138	30.476	28.8254	28.7934	28.968	28.268	28.2023	28.1774	28.7572	28.5964	28.4427	5	33.1	185.91	5.8	-0.257699	0	217.18
Pg_S3748.5	aconitase 3	AT2G05710.1	P07264	AT2G05710.1 | Symbols: ACO3 | aconitase 3 | chr2:2141591-2146350 FORWARD LENGTH=990	3-isopropylmalate dehydratase OS=Saccharomyces cerevisiae (strain ATCC 204508 / S288c) GN=LEU1 PE=1 SV=3	Cytoplasmic; Mitochondrial; Chloroplast	31.7981	31.8587	31.8288	31.6394	31.7229	31.6118	30.5373	30.5877	30.5757	31.5762	31.4036	31.4091	2	47.7	107.99	7.276	-0.18854	0	323.31
Pg_S3754.2	calcium-dependent protein kinase 21	AT4G04720.1	Q96QS6	AT4G04720.1 | Symbols: CPK21 | calcium-dependent protein kinase 21 | chr4:2394817-2397631 REVERSE LENGTH=531	Serine/threonine-protein kinase H2 OS=Homo sapiens GN=PSKH2 PE=2 SV=1	Cytoplasmic; Nuclear;	25.2383	24.7831	25.0401	25.0737	25.0703	24.8317	24.9754	25.0863	25.1871	24.9455	24.6123	24.9572	3	11.9	61.884	5.987	-0.572263	0	16.555
Pg_S3755.2	aminopeptidase M1	AT4G33090.1	Q8VZH2	AT4G33090.1 | Symbols: APM1, ATAPM1 | aminopeptidase M1 | chr4:15965915-15970418 REVERSE LENGTH=879	Aminopeptidase M1 OS=Arabidopsis thaliana GN=APM1 PE=1 SV=1	Cytoplasmic;	27.0915	27.0899	27.164	28.256	28.2597	28.3196	27.9522	28.0491	27.95	28.3251	28.4088	28.039	4	35.9	98.186	5.271	-0.238895	0	170.96
Pg_S3756.11	gamma-glutamyl hydrolase 2	AT1G78680.1	A7YWG4	AT1G78680.1 | Symbols: ATGGH2, GGH2 | gamma-glutamyl hydrolase 2 | chr1:29593933-29596037 FORWARD LENGTH=347	Gamma-glutamyl hydrolase OS=Bos taurus GN=GGH PE=2 SV=1	Plasmamembrane; Chloroplast;	28.6112	28.4068	28.6098	25.7538	25.2777	25.6912	24.6109	24.6193	25.6419	25.7117	25.5452	25.4854	5	35.1	41.314	5.631	-0.181892	0	24.563
Pg_S3761.3	unknown protein; FUNCTIONS IN: molecular_function unknown; INVOLVED IN: biological_process unknown; LOCATED IN: plasma membrane; BEST Arabidopsis thaliana protein match is: unknown protein (TAIR:AT3G28720.1); Has 5 Blast hits to 5 proteins i	unknown	unknown	unknown	unknown	Nuclear;	28.5484	28.7631	28.6242	26.0414	25.8024	25.9718	23.8758	24.3272	25.7361	25.9558	26.2781	26.1358	13	24.7	83.857	6.136	-0.354491	0	42.184
Pg_S3774.1	Protein of unknown function, DUF642	AT5G11420.1	-	AT5G11420.1 | Symbols: | Protein of unknown function, DUF642 | chr5:3644655-3646991 FORWARD LENGTH=366	-	Cytoplasmic; Chloroplast;	24.9172	25.858	25.105	25.1452	26.6363	26.6367	29.5438	29.539	29.4689	24.4574	25.0222	24.7359	1	42.8	40.82	6.144	-0.0639037	0	155.61
Pg_S3794.22	villin 4	AT4G30160.2	P34268	AT4G30160.2 | Symbols: VLN4 | villin 4 | chr4:14754528-14759511 FORWARD LENGTH=983	Protein flightless-1 homolog OS=Caenorhabditis elegans GN=fli-1 PE=2 SV=2	Cytoplasmic;	28.022	27.9858	28.0587	26.5993	26.6071	26.4507	26.3069	26.4343	24.8048	26.3486	26.3705	26.2397	6	18.3	105.21	5.817	-0.45138	0	35.815
Pg_S3804.6	vacuolar ATP synthase subunit A	AT1G78900.1	P41009	AT1G78900.1 | Symbols: VHA-A | vacuolar ATP synthase subunit A | chr1:29660463-29664575 FORWARD LENGTH=623	ATP synthase subunit beta OS=Bacillus caldotenax GN=atpD PE=3 SV=1	Cytoplasmic; Chloroplast;	26.9697	27.2021	27.1299	26.962	26.8008	26.9056	26.163	25.9817	26.1724	26.993	27.0088	27.0261	5	72.2	68.829	5.174	-0.185714	0	12.387
Pg_S3827.2	Pyridoxal phosphate (PLP)-dependent transferases superfamily protein	AT1G43710.1	Q9CG20	AT1G43710.1 | Symbols: emb1075 | Pyridoxal phosphate (PLP)-dependent transferases superfamily protein | chr1:16486534-16488298 REVERSE LENGTH=482	Glutamate decarboxylase OS=Lactococcus lactis subsp. lactis (strain IL1403) GN=gadB PE=1 SV=1	Cytoplasmic; Mitochondrial; Chloroplast	28.573	28.5074	28.6878	28.2392	28.2536	28.3553	27.538	27.4709	27.4584	28.2796	28.388	28.3838	16	53.4	56.287	7.031	-0.203536	0	103.97
Pg_S3830.6	sucrose synthase 6	AT1G73370.1	B8HCF8	AT1G73370.1 | Symbols: SUS6, ATSUS6 | sucrose synthase 6 | chr1:27584533-27588326 REVERSE LENGTH=942	D-inositol 3-phosphate glycosyltransferase OS=Arthrobacter chlorophenolicus (strain A6 / ATCC 700700 / DSM 12829 / JCM 12360) GN=mshA PE=3 SV=1	Cytoplasmic;	25.6531	25.9257	25.8691	26.2744	26.2126	26.2659	26.3191	26.0454	26.2586	26.3648	26.4643	26.7773	8	15.7	94.428	7.593	-0.391189	0	19.351
Pg_S3833.3	ATPase, F1 complex, gamma subunit protein	AT4G04640.1	Q5QZI5	AT4G04640.1 | Symbols: ATPC1 | ATPase, F1 complex, gamma subunit protein | chr4:2350761-2351882 REVERSE LENGTH=373	ATP synthase gamma chain OS=Idiomarina loihiensis (strain ATCC BAA-735 / DSM 15497 / L2-TR) GN=atpG PE=3 SV=1	Chloroplast;	28.1797	28.5196	28.9461	29.5735	29.9473	29.7572	28.4455	28.524	28.9261	30.7049	30.3754	30.381	9	59.6	41.467	6.031	-0.112766	0	89.366
Pg_S3843.11	MLP-like protein 423	AT1G24020.1	P85524	AT1G24020.1 | Symbols: MLP423 | MLP-like protein 423 | chr1:8500653-8501458 REVERSE LENGTH=155	Kirola OS=Actinidia deliciosa PE=1 SV=1	Cytoplasmic;	29.4564	28.3083	28.2405	27.4666	27.6673	27.3503	29.7447	29.6029	29.5792	26.7356	26.5714	26.7951	1	83.1	16.582	4.375	-0.00324675	0	11.341
Pg_S3855.13	Pyruvate kinase family protein	AT5G56350.1	P19680	AT5G56350.1 | Symbols: | Pyruvate kinase family protein | chr5:22820254-22822529 REVERSE LENGTH=498	Pyruvate kinase (Fragment) OS=Spiroplasma citri GN=pyk PE=3 SV=1	Nuclear;	28.295	27.9279	28.0517	28.9738	28.8104	29.0433	27.5161	27.6006	27.5467	28.7498	28.425	28.7784	7	27.9	118.64	4.875	-0.575187	0	128.51
Pg_S3876.17	Glycosyl hydrolases family 32 protein	AT1G12240.1	Q04937	AT1G12240.1 | Symbols: ATBETAFRUCT4, VAC-INV | Glycosyl hydrolases family 32 protein | chr1:4153699-4157457 FORWARD LENGTH=664	Sucrose-6-phosphate hydrolase OS=Lactococcus lactis subsp. lactis GN=scrB PE=1 SV=1	Extracellular; Vacuole;	31.42	31.6786	31.5666	29.6186	29.4826	29.5462	29.1995	29.4312	29.2033	29.6317	29.7121	29.6365	13	32	72.512	5.138	-0.224353	0	108.77
Pg_S7223.1	N-terminal nucleophile aminohydrolases (Ntn hydrolases) superfamily protein	AT5G08100.1	B4GHE3	AT5G08100.1 | Symbols: | N-terminal nucleophile aminohydrolases (Ntn hydrolases) superfamily protein | chr5:2593242-2594586 REVERSE LENGTH=315	L-asparaginase-like protein GL17509 OS=Drosophila persimilis GN=GL17509 PE=3 SV=1	Extracellular; Chloroplast;	27.8673	27.9472	27.9508	28.5524	28.3877	28.2485	28.6659	28.4141	28.5402	28.3419	28.201	28.4453	7	57	25.373	4.686	-0.0982979	0	235.72
Pg_S3920.12	UDP-Glycosyltransferase superfamily protein	AT4G01070.1	P34317	AT4G01070.1 | Symbols: GT72B1, UGT72B1 | UDP-Glycosyltransferase superfamily protein | chr4:461858-463300 REVERSE LENGTH=480	Putative UDP-glucuronosyltransferase ugt-60 OS=Caenorhabditis elegans GN=ugt-60 PE=3 SV=2	Cytoplasmic; Chloroplast;	28.8518	28.4186	28.7475	29.2914	29.211	29.0587	26.9434	27.1136	27.2774	28.7444	28.946	28.773	6	35.3	53.081	4.969	-0.136975	0	59.028
Pg_S3947.9	Class II aminoacyl-tRNA and biotin synthetases superfamily protein	AT5G56680.1	Q97PR0	AT5G56680.1 | Symbols: SYNC1, EMB2755, SYNC1 ARATH | Class II aminoacyl-tRNA and biotin synthetases superfamily protein | chr5:22936645-22938841 FORWARD LENGTH=572	Asparagine--tRNA ligase OS=Streptococcus pneumoniae serotype 4 (strain ATCC BAA-334 / TIGR4) GN=asnS PE=1 SV=1	Cytoplasmic;	28.0991	28.3677	28.3182	27.9382	27.8746	28.0718	27.2561	27.5186	27.2855	27.9762	28.0013	27.9339	6	27.8	63.304	5.873	-0.250355	0	76.66
Pg_S3948.2	Polyketide cyclase/dehydrase and lipid transport superfamily protein	AT1G55960.1	Q8R1R3	AT1G55960.1 | Symbols: | Polyketide cyclase/dehydrase and lipid transport superfamily protein | chr1:20927962-20929825 REVERSE LENGTH=403	StAR-related lipid transfer protein 7, mitochondrial OS=Mus musculus GN=Stard7 PE=2 SV=2	Chloroplast;	25.5649	25.573	25.9168	25.712	26.1146	25.5255	25.6089	25.2464	25.5009	26.1233	25.6465	25.8394	3	14.2	25.472	9.416	-0.090708	0	7.2867
Pg_S3957.4	DEAD/DEAH box RNA helicase family protein	unknown	unknown	unknown	unknown	Cytoplasmic; Nuclear;	25.3268	25.811	25.8133	27.2662	27.5004	27.4771	29.5895	29.8031	29.8957	27.5347	27.2566	27.2631	3	68.5	48.377	5.288	-0.228037	0	246.39
Pg_S3958.7	Ribosomal protein S5/Elongation factor G/III/V family protein	AT3G12915.1	C0Q0C2	AT3G12915.1 | Symbols: | Ribosomal protein S5/Elongation factor G/III/V family protein | chr3:4112999-4115708 FORWARD LENGTH=820	Elongation factor G OS=Salmonella paratyphi C (strain RKS4594) GN=fusA PE=3 SV=1	Cytoplasmic;	27.0549	29.2487	28.9233	26.9455	27.4225	27.1299	29.1687	29.1315	29.0082	27.5008	26.9952	27.55	3	60.8	39.314	5.065	-0.280398	0	76.941
Pg_S3958.9	Ribosomal protein S5/Elongation factor G/III/V family protein	AT3G12915.1	C0Q0C2	AT3G12915.1 | Symbols: | Ribosomal protein S5/Elongation factor G/III/V family protein | chr3:4112999-4115708 FORWARD LENGTH=820	Elongation factor G OS=Salmonella paratyphi C (strain RKS4594) GN=fusA PE=3 SV=1	Cytoplasmic;	30.722	30.567	30.6829	31.824	31.8359	31.767	32.3266	32.329	32.28	31.3871	31.4912	31.4632	2	68.9	87.925	5.705	-0.238071	0	323.31
Pg_S4883.6	nuclear encoded CLP protease 5	AT1G02560.1	Q493F8	AT1G02560.1 | Symbols: CLPP5, NCLPP5, NCLPP1 | nuclear encoded CLP protease 5 | chr1:538000-539805 FORWARD LENGTH=298	ATP-dependent Clp protease proteolytic subunit OS=Blochmannia pennsylvanicus (strain BPEN) GN=clpP PE=3 SV=1	Mitochondrial; Chloroplast; Nuclear	27.9159	28.0257	27.8188	29.3633	29.1762	29.2471	28.8027	28.8749	28.5309	28.4103	28.1889	28.3441	5	26.9	31.943	8.832	-0.19932	0	70.579
Pg_S3988.5	FtsH extracellular protease family	AT5G42270.1	Q9SSB4	AT5G42270.1 | Symbols: VAR1, FTSH5 | FtsH extracellular protease family | chr5:16902659-16905102 FORWARD LENGTH=704	26S protease regulatory subunit 7 homolog B OS=Arabidopsis thaliana GN=RPT1B PE=1 SV=2	Chloroplast;	31.0197	31.1064	31.1209	31.5049	31.59	31.5172	31.6758	31.7083	31.6199	31.745	31.7169	31.7375	3	54	78.809	6.367	-0.134973	0	323.31
Pg_S3991.17	K+ efflux antiporter 2	AT4G00630.2	Q9ZTZ7	AT4G00630.2 | Symbols: KEA2 | K+ efflux antiporter 2 | chr4:261655-267789 REVERSE LENGTH=1185	K(+) efflux antiporter 1, chloroplastic OS=Arabidopsis thaliana GN=KEA1 PE=1 SV=2	Plasmamembrane;	26.3127	26.7011	26.2476	26.1108	25.8967	25.9452	25.8672	26.0492	25.7038	25.4664	25.4843	25.6745	5	13.2	132.09	4.771	-0.0110197	0	42.396
Pg_S4021.14	ADP-ribosylation factor A1F	AT1G10630.1	Q54GY8	AT1G10630.1 | Symbols: ATARFA1F, ARFA1F | ADP-ribosylation factor A1F | chr1:3513189-3514230 REVERSE LENGTH=181	Ras-related protein Rab-18 OS=Dictyostelium discoideum GN=rab18 PE=3 SV=1	Mitochondrial;	26.7656	26.6395	26.8846	30.3525	30.3552	30.1223	30.9197	30.928	30.7267	29.9851	30.096	30.266	2	74.5	21.084	7.158	-0.235326	0	152.71
Pg_S4021.17	ribosomal protein L12-A	AT3G27830.1	C1F3Y2	AT3G27830.1 | Symbols: RPL12-A, RPL12 | ribosomal protein L12-A | chr3:10318576-10319151 FORWARD LENGTH=191	50S ribosomal protein L7/L12 OS=Acidobacterium capsulatum (strain ATCC 51196 / DSM 11244 / JCM 7670) GN=rplL PE=3 SV=1	Chloroplast;	28.4505	28.2283	28.6008	28.669	28.3556	28.581	28.5976	28.5098	28.0759	31.086	31.0501	30.912	6	46	20.084	5.772	-0.0306878	0	49.059
Pg_S4045.3	thioredoxin-dependent peroxidase 1	AT1G65980.1	Q8RCY5	AT1G65980.1 | Symbols: TPX1 | thioredoxin-dependent peroxidase 1 | chr1:24559524-24560753 REVERSE LENGTH=162	Peroxiredoxin 1 OS=Thermoanaerobacter tengcongensis (strain DSM 15242 / JCM 11007 / NBRC 100824 / MB4) GN=TTE0270 PE=3 SV=2	Cytoplasmic;	26.3164	26.9313	26.7314	29.5936	29.1758	29.7725	29.0545	28.9617	29.0609	29.876	29.7669	29.6101	4	67.9	17.39	5.566	0.0623457	0	118.61
Pg_S4048.5	Ribosomal protein S5 family protein	AT1G64880.1	Q6AP53	AT1G64880.1 | Symbols: | Ribosomal protein S5 family protein | chr1:24105713-24108780 FORWARD LENGTH=515	30S ribosomal protein S5 OS=Desulfotalea psychrophila (strain LSv54 / DSM 12343) GN=rpsE PE=3 SV=1	Cytoplasmic; Mitochondrial;	28.3753	28.4361	28.5516	29.3793	29.0331	29.1994	30.106	30.0422	30.0293	29.3786	29.3299	29.1245	2	43.8	29.98	10.658	-0.401838	0	323.31
Pg_S4048.6	Isocitrate/isopropylmalate dehydrogenase family protein	AT5G14590.1	P53982	AT5G14590.1 | Symbols: | Isocitrate/isopropylmalate dehydrogenase family protein | chr5:4703533-4706627 REVERSE LENGTH=485	Isocitrate dehydrogenase [NADP] OS=Saccharomyces cerevisiae (strain ATCC 204508 / S288c) GN=IDP3 PE=1 SV=1	Cytoplasmic; Mitochondrial;	25.9714	25.8884	26.0316	27.6111	27.5368	27.691	26.8443	26.8398	26.0376	27.2994	27.1554	26.9366	5	32.4	65.125	8.965	-0.150607	0	28.7
Pg_S4096.1	Translation elongation factor EF1B, gamma chain	AT1G09640.1	Q9VG96	AT1G09640.1 | Symbols: | Translation elongation factor EF1B, gamma chain | chr1:3120162-3122152 FORWARD LENGTH=414	Glutathione S-transferase D4 OS=Drosophila melanogaster GN=GstD4 PE=1 SV=1	Cytoplasmic; Chloroplast;	28.1604	28.2325	28.394	30.094	30.1221	30.1407	29.803	29.7864	29.7705	29.9878	30.0464	30.1365	4	49.7	51.769	6.239	-0.354525	0	199.88
Pg_S4106.4	S-formylglutathione hydrolase	AT2G41530.1	P40363	AT2G41530.1 | Symbols: ATSFGH, SFGH | S-formylglutathione hydrolase | chr2:17323656-17325430 REVERSE LENGTH=284	S-formylglutathione hydrolase OS=Saccharomyces cerevisiae (strain ATCC 204508 / S288c) GN=YJL068C PE=1 SV=1	Extracellular;	27.7027	27.9575	27.9502	27.871	27.8452	27.8979	27.294	27.2505	26.3011	27.6079	27.7056	27.458	8	47.1	28.741	5.307	-0.344747	0	54.148
Pg_S4129.6	glycine decarboxylase P-protein 1	AT4G33010.1	A4WUX2	AT4G33010.1 | Symbols: AtGLDP1, GLDP1 | glycine decarboxylase P-protein 1 | chr4:15926852-15931150 REVERSE LENGTH=1037	Glycine dehydrogenase (decarboxylating) OS=Rhodobacter sphaeroides (strain ATCC 17025 / ATH 2.4.3) GN=gcvP PE=3 SV=1	Cytoplasmic; Mitochondrial;	29.007	28.4656	29.4255	29.0155	28.9065	29.3276	27.4447	27.4875	27.5419	28.1053	28.6051	28.6276	4	70	102.71	6.169	-0.0996829	0	53.072
Pg_S4142.9	DNA/RNA polymerases superfamily protein	ATMG00860.1	P27401	ATMG00860.1 | Symbols: ORF158 | DNA/RNA polymerases superfamily protein | chrM:235916-236392 FORWARD LENGTH=158	Pro-Pol polyprotein OS=Simian foamy virus type 3 (strain LK3) GN=pol PE=3 SV=2	Cytoplasmic; Mitochondrial;	28.4483	28.5635	29.0441	29.9097	29.9424	30.1057	31.1604	31.2284	31.1631	29.8808	29.8745	30.2645	10	28.8	45.829	6.2	-0.176355	0	323.31
Pg_S4146.2	Metallopeptidase M24 family protein	AT3G51800.2	Q9ZCD3	AT3G51800.2 | Symbols: ATG2, EBP1, ATEBP1 | metallopeptidase M24 family protein | chr3:19211261-19213568 REVERSE LENGTH=401	Methionine aminopeptidase OS=Rickettsia prowazekii (strain Madrid E) GN=map PE=1 SV=1	Mitochondrial; Chloroplast;	25.5107	26.1756	25.2902	24.6714	23.9079	24.4481	25.2681	25.1365	25.1407	24.4347	24.6196	24.7253	8	16.3	98.543	8.578	-0.338983	0	39.597
Pg_S4157.4	UDP-Glycosyltransferase superfamily protein	AT4G01070.1	P34317	AT4G01070.1 | Symbols: GT72B1, UGT72B1 | UDP-Glycosyltransferase superfamily protein | chr4:461858-463300 REVERSE LENGTH=480	Putative UDP-glucuronosyltransferase ugt-60 OS=Caenorhabditis elegans GN=ugt-60 PE=3 SV=2	Plasmamembrane; Cytoplasmic;	28.5625	28.5763	28.6102	29.5443	29.379	29.485	30.9803	30.9602	30.986	29.0077	29.0646	29.2161	4	46.5	53.443	4.96	-0.120632	0	323.31
Pg_S4162.4	CLPC homologue 1	AT5G50920.1	P84565	AT5G50920.1 | Symbols: CLPC, ATHSP93-V, HSP93-V, DCA1, CLPC1 | CLPC homologue 1 | chr5:20715710-20719800 REVERSE LENGTH=929	ATP-dependent Clp protease ATP-binding subunit clpA homolog (Fragments) OS=Populus euphratica PE=1 SV=1	Mitochondrial; Chloroplast;	30.1867	30.2339	30.2888	31.6995	31.7567	31.8102	32.3108	32.3212	32.3169	31.8182	31.8713	31.8131	8	54.7	102.37	6.418	-0.357592	0	323.31
Pg_S4174.1	Zinc-binding dehydrogenase family protein	AT5G37980.1	Q9C0Y6	AT5G37980.1 | Symbols: | Zinc-binding dehydrogenase family protein | chr5:15131405-15132940 FORWARD LENGTH=353	Zinc-type alcohol dehydrogenase-like protein PB24D3.08c OS=Schizosaccharomyces pombe (strain 972 / ATCC 24843) GN=SPAPB24D3.08c PE=3 SV=1	Cytoplasmic;	28.1381	28.2955	28.3016	28.1283	27.862	27.9227	26.7727	26.7799	26.8457	27.9963	27.9299	27.8707	2	45.2	38.052	6.672	-0.0760933	0	38.971
Pg_S4177.2	glutamine synthetase 2	AT5G35630.1	Q60182	AT5G35630.1 | Symbols: GS2, GLN2, ATGSL1 | glutamine synthetase 2 | chr5:13831220-13833239 FORWARD LENGTH=430	Glutamine synthetase OS=Methanocaldococcus jannaschii (strain ATCC 43067 / DSM 2661 / JAL-1 / JCM 10045 / NBRC 100440) GN=glnA PE=3 SV=1	Cytoplasmic; Chloroplast;	29.7113	28.9346	29.0351	27.7586	27.6865	27.5179	27.2202	27.4362	27.2153	27.2233	26.7727	27.5687	2	54.6	47.625	5.872	-0.454398	0	17.793
Pg_S4209.3	glycyl-tRNA synthetase / glycine--tRNA ligase	AT1G29880.1	B9E6V6	AT1G29880.1 | Symbols: | glycyl-tRNA synthetase / glycine--tRNA ligase | chr1:10459662-10462781 REVERSE LENGTH=729	Glycine--tRNA ligase OS=Macrococcus caseolyticus (strain JCSC5402) GN=glyQS PE=3 SV=1	Cytoplasmic;	28.258	28.2061	28.2863	29.6554	29.6062	29.6597	29.3195	29.1935	29.358	29.579	29.5621	29.5132	5	45.5	62.808	6.202	-0.301978	0	256.41
Pg_S4217.5	chloroplast heat shock protein 70-2	AT5G49910.1	P0CS91	AT5G49910.1 | Symbols: CPHSC70-2EAT SHOCK PROTEIN 70-2, HSC70-7, cpHsc70-2 | chloroplast heat shock protein 70-2 | chr5:20303470-20306295 FORWARD LENGTH=718	Heat shock protein SSC1, mitochondrial OS=Saccharomyces cerevisiae GN=SSC1 PE=1 SV=1	Mitochondrial; Chloroplast;	33.5185	33.5303	33.5569	32.4699	32.4344	32.499	31.998	31.9906	31.8899	32.5457	32.4991	32.4168	11	44.9	75.695	5.196	-0.319492	0	323.31
Pg_S4225.11	glyceraldehyde 3-phosphate dehydrogenase A subunit	AT3G26650.1	Q5PJI5	AT3G26650.1 | Symbols: GAPA, GAPA-1 | glyceraldehyde 3-phosphate dehydrogenase A subunit | chr3:9795226-9796848 FORWARD LENGTH=396	D-erythrose-4-phosphate dehydrogenase OS=Salmonella paratyphi A (strain ATCC 9150 / SARB42) GN=epd PE=3 SV=1	Chloroplast;	32.0593	32.0095	32.2733	28.3064	28.8858	28.0216	29.9948	30.1438	30.7145	28.8186	28.8785	28.6598	4	65.9	42.478	7.406	0.0140351	0	96.741
Pg_S4247.1	Glycosyl hydrolases family 31 protein	unknown	unknown	unknown	unknown	Cytoplasmic;	28.9418	28.8311	28.8244	26.9107	26.6832	26.9664	26.1264	26.4266	25.7178	26.7292	26.8123	26.3862	8	20.4	107.14	5.938	-0.465955	0	50.493
Pg_S4250.13	Papain family cysteine protease	AT2G21430.1	P25249	AT2G21430.1 | Symbols: | Papain family cysteine protease | chr2:9171964-9173301 REVERSE LENGTH=361	Cysteine proteinase EP-B 1 OS=Hordeum vulgare GN=EPB1 PE=2 SV=1	Extracellular; Lysosomal;	28.033	27.8736	27.7468	26.3196	26.2178	25.9658	26.4706	26.5626	26.8102	26.1577	26.0187	25.9437	2	30.3	40.207	5.353	-0.318852	0	53.356
Pg_S4269.6	Protein of unknown function, DUF538	AT5G54530.1	-	AT5G54530.1 | Symbols: | Protein of unknown function, DUF538 | chr5:22152781-22154201 FORWARD LENGTH=161	-	Cytoplasmic; Nuclear;	27.315	27.4734	27.3471	27.3528	27.1145	27.5711	28.584	28.7353	28.6857	27.6464	27.5773	27.4285	1	59.9	17.606	6.183	-0.363694	0	81.838
Pg_S4318.6	triosephosphate isomerase	AT2G21170.1	P48491	AT2G21170.1 | Symbols: TIM, PDTPI | triosephosphate isomerase | chr2:9071047-9073106 REVERSE LENGTH=315	Triosephosphate isomerase, cytosolic OS=Arabidopsis thaliana GN=CTIMC PE=1 SV=2	Cytoplasmic; Chloroplast;	30.71	30.275	30.5872	31.187	31.1105	30.8975	31.2989	31.1374	31.2219	30.9637	30.6677	30.8343	1	77.2	27.02	5.436	0.0929134	0	235.5
Pg_S4321.2	NAD(P)-binding Rossmann-fold superfamily protein	AT1G30620.1	Q31FG4	AT1G30620.1 | Symbols: HSR8, MUR4, UXE1 | NAD(P)-binding Rossmann-fold superfamily protein | chr1:10855496-10857970 FORWARD LENGTH=419	ADP-L-glycero-D-manno-heptose-6-epimerase OS=Thiomicrospira crunogena (strain XCL-2) GN=hldD PE=3 SV=1	Cytoplasmic;	27.2718	27.4894	27.4893	28.4545	28.5372	28.0174	26.3092	26.2124	26.4993	28.2971	28.3346	28.0982	8	34.4	39.357	4.997	-0.315029	0	37.16
Pg_S4344.7	NAD(P)-binding Rossmann-fold superfamily protein	AT1G30620.1	Q31FG4	AT1G30620.1 | Symbols: HSR8, MUR4, UXE1 | NAD(P)-binding Rossmann-fold superfamily protein | chr1:10855496-10857970 FORWARD LENGTH=419	ADP-L-glycero-D-manno-heptose-6-epimerase OS=Thiomicrospira crunogena (strain XCL-2) GN=hldD PE=3 SV=1	Chloroplast;	26.8974	26.3593	27.0395	28.8021	28.6588	28.7713	26.8753	26.7409	26.757	28.6042	28.8036	28.3817	4	39.4	33.486	5.726	0.0435897	0	19.523
Pg_S4357.3	FUNCTIONS IN: molecular_function unknown; INVOLVED IN: biological_process unknown; LOCATED IN: chloroplast; EXPRESSED IN: 22 plant structures; EXPRESSED DURING: 13 growth stages; BEST Arabidopsis thaliana protein match is: cobalt ion binding	unknown	unknown	unknown	unknown	Plasmamembrane; Chloroplast;	26.6237	27.1489	27.3039	25.4498	25.509	25.2656	26.661	26.6847	26.9752	25.2666	24.8614	25.4598	9	56.6	23.606	6.596	-0.303302	0	48.177
Pg_S4358.1	vacuolar ATP synthase subunit C (VATC) / V-ATPase C subunit / vacuolar proton pump C subunit (DET3)	AT1G12840.1	Q9HDW6	AT1G12840.1 | Symbols: DET3, ATVHA-C | vacuolar ATP synthase subunit C (VATC) / V-ATPase C subunit / vacuolar proton pump C subunit (DET3) | chr1:4375584-4378220 FORWARD LENGTH=375	V-type proton ATPase subunit C OS=Schizosaccharomyces pombe (strain 972 / ATCC 24843) GN=vma5 PE=1 SV=1	Nuclear;	24.435	24.6411	24.8912	26.3003	26.0262	25.896	24.8679	25.0058	25.3398	26.2916	26.2895	26.302	4	19.4	45.376	4.966	-0.405051	0	13.081
Pg_S4363.6	ATP-citrate lyase A-3	AT1G09430.1	O13907	AT1G09430.1 | Symbols: ACLA-3 | ATP-citrate lyase A-3 | chr1:3042135-3044978 FORWARD LENGTH=424	Probable ATP-citrate synthase subunit 2 OS=Schizosaccharomyces pombe (strain 972 / ATCC 24843) GN=SPAC22A12.16 PE=1 SV=1	Cytoplasmic; Chloroplast;	26.0344	25.6893	25.7481	27.2315	27.2071	27.0127	28.4403	27.9112	28.6178	26.9614	26.8883	26.8844	9	40.4	46.647	6.043	-0.0673759	0	119.62
Pg_S4369.3	monodehydroascorbate reductase 6	AT1G63940.2	Q9M5K3	AT1G63940.2 | Symbols: MDAR6 | monodehydroascorbate reductase 6 | chr1:23730095-23733534 FORWARD LENGTH=493	Dihydrolipoyl dehydrogenase 1, mitochondrial OS=Arabidopsis thaliana GN=LPD1 PE=1 SV=2	Chloroplast;	29.16	29.0019	29.0619	29.6651	29.405	29.5211	27.9003	28.124	28.2124	29.5273	29.4323	29.4689	13	39.3	53.411	8.098	-0.12229	0	47.936
Pg_S7699.3	isoprenoid F	AT1G63970.1	Q8ZMF7	AT1G63970.1 | Symbols: ISPF, MECPS | isoprenoid F | chr1:23738923-23740336 REVERSE LENGTH=231	2-C-methyl-D-erythritol 2,4-cyclodiphosphate synthase OS=Salmonella typhimurium (strain LT2 / SGSC1412 / ATCC 700720) GN=ispF PE=1 SV=1	Mitochondrial; Chloroplast;	24.1188	23.9699	23.6748	26.7338	26.2399	25.5852	27.1416	26.9633	27.1347	24.2348	24.3338	24.1162	1	29.1	25.57	8.953	0.0839662	0	16.519
Pg_S4394.1	chloroplastic lipocalin	AT3G47860.1	-	AT3G47860.1 | Symbols: CHL | chloroplastic lipocalin | chr3:17656778-17658269 REVERSE LENGTH=353	-	Chloroplast; Nuclear;	29.3944	29.2893	29.0633	27.6176	27.0158	27.2593	26.6116	26.7762	26.8882	27.6195	27.6043	27.298	11	24.1	45.93	5.604	-0.342553	0	71.551
Pg_S4394.16	peroxisomal NAD-malate dehydrogenase 1	AT2G22780.1	Q88Q44	AT2G22780.1 | Symbols: PMDH1 | peroxisomal NAD-malate dehydrogenase 1 | chr2:9689995-9691923 REVERSE LENGTH=354	Probable malate dehydrogenase OS=Pseudomonas putida (strain KT2440) GN=mdh PE=3 SV=1	Mitochondrial; Peroxisomal;	30.095	30.1484	30.0335	31.5142	31.6505	31.4641	30.2745	30.3068	30.362	30.3886	30.6108	30.5501	5	66.7	37.278	8.155	0.213559	0	228.67
Pg_S4395.9	Prolyl oligopeptidase family protein	AT2G47390.1	P34422	AT2G47390.1 | Symbols: | Prolyl oligopeptidase family protein | chr2:19442278-19446253 REVERSE LENGTH=961	Dipeptidyl peptidase family member 6 OS=Caenorhabditis elegans GN=dpf-6 PE=3 SV=2	Cytoplasmic; Chloroplast;	30.0646	30.0531	29.9047	29.1505	29.1828	29.3318	29.0534	28.9568	28.9034	29.0393	29.0581	28.8845	3	38.5	100.34	5.594	-0.382594	0	93.081
Pg_S7398.1	Sec23/Sec24 protein transport family protein	AT1G05520.1	P38769	AT1G05520.1 | Symbols: | Sec23/Sec24 protein transport family protein | chr1:1631126-1635703 REVERSE LENGTH=783	Uncharacterized protein YHR035W OS=Saccharomyces cerevisiae (strain ATCC 204508 / S288c) GN=YHR035W PE=1 SV=1	Plasmamembrane; Nuclear;	27.0454	26.891	26.9607	25.57	25.1406	25.7706	26.4777	26.8727	26.013	25.3302	25.2172	25.4741	5	16.1	110.94	6.886	-0.188683	0	32.117
Pg_S4870.15	multidrug resistance-associated protein 4	AT2G47800.1	Q2QLB4	AT2G47800.1 | Symbols: ATMRP4, EST3, MRP4, ABCC4 | multidrug resistance-associated protein 4 | chr2:19574944-19580383 FORWARD LENGTH=1516	Cystic fibrosis transmembrane conductance regulator OS=Callicebus moloch GN=CFTR PE=3 SV=1	Plasmamembrane;	26.5453	26.4474	26.3152	26.9631	26.9056	26.5909	27.2027	27.2733	27.315	26.7178	26.5529	26.5782	13	13.6	168.29	7.806	0.19221	0	80.378
Pg_S4442.9	tolB protein-related	AT4G01870.1	Q14HZ9	AT4G01870.1 | Symbols: | tolB protein-related | chr4:808473-810431 REVERSE LENGTH=652	Protein TolB OS=Francisella tularensis subsp. tularensis (strain FSC 198) GN=tolB PE=3 SV=1	Chloroplast;	30.2442	30.0188	30.0654	28.1531	28.6529	28.7253	25.7666	25.6884	26.7595	28.5079	28.5027	28.3242	20	46.8	73.35	6.268	-0.33186	0	78.305
Pg_S4458.1	RNA-binding (RRM/RBD/RNP motifs) family protein	AT4G14300.1	Q6GLB5	AT4G14300.1 | Symbols: | RNA-binding (RRM/RBD/RNP motifs) family protein | chr4:8231179-8232785 FORWARD LENGTH=411	ELAV-like protein 1 OS=Xenopus tropicalis GN=elavl1 PE=2 SV=1	Nuclear;	29.7083	29.7104	29.6828	27.745	27.8788	27.715	28.4385	28.4498	28.1634	27.2637	27.3231	27.5222	7	35.2	41.766	6.612	-0.425436	0	115.56
Pg_S4480.2	RAB GTPase homolog B1C	AT4G17170.1	Q96E17	AT4G17170.1 | Symbols: AT-RAB2, ATRABB1C, ATRAB2A, RAB2A, RABB1C, ATRAB-B1B, RAB-B1B | RAB GTPase homolog B1C | chr4:9644908-9646220 REVERSE LENGTH=211	Ras-related protein Rab-3C OS=Homo sapiens GN=RAB3C PE=2 SV=1	Cytoplasmic; Mitochondrial;	27.3421	27.5552	27.348	27.8391	27.7952	27.728	26.7745	26.9041	26.8975	27.6785	27.6256	27.518	2	52.6	23.067	6.609	-0.142654	0	128.03
Pg_S4667.9	photosystem I light harvesting complex gene 3	AT1G61520.1	P08975	AT1G61520.1 | Symbols: LHCA3 | photosystem I light harvesting complex gene 3 | chr1:22700152-22701149 FORWARD LENGTH=273	Light-harvesting complex I LH35 proteins (Fragment) OS=Euglena gracilis PE=2 SV=1	Chloroplast;	30.154	29.9931	30.026	33.4385	33.3288	33.3229	33.1671	33.2355	33.3605	31.6133	31.6074	31.5627	10	44.3	29.493	7.058	-0.0153846	0	255.85
Pg_S4487.19	6-phosphogluconate dehydrogenase family protein	AT3G02360.2	O33730	AT3G02360.2 | Symbols: | 6-phosphogluconate dehydrogenase family protein | chr3:482498-483958 FORWARD LENGTH=486	Uncharacterized oxidoreductase Sfri_1503 OS=Shewanella frigidimarina (strain NCIMB 400) GN=Sfri_1503 PE=3 SV=2	Chloroplast;	27.5136	27.2889	27.4799	28.4181	27.9641	28.2952	27.1336	27.2924	27.2903	28.124	28.1428	28.1158	7	49.7	53.466	5.982	-0.216155	0	117.86
Pg_S4496.1	aspartate aminotransferase 5	AT4G31990.3	P85906	AT4G31990.3 | Symbols: ASP5, AAT3, ATAAT1 | aspartate aminotransferase 5 | chr4:15470876-15473521 REVERSE LENGTH=462	Aspartate aminotransferase 1 (Fragments) OS=Pseudotsuga menziesii PE=1 SV=1	Mitochondrial; Chloroplast;	30.087	30.0643	30.0026	31.1367	30.8981	30.8412	30.9491	30.7256	30.8303	30.7522	30.7781	30.7101	5	70.5	48.515	7.4	-0.212273	0	275.74
Pg_S4499.1	Transducin/WD40 repeat-like superfamily protein	AT3G53390.1	Q8BHD1	AT3G53390.1 | Symbols: | Transducin/WD40 repeat-like superfamily protein | chr3:19792781-19796428 FORWARD LENGTH=558	POC1 centriolar protein homolog B OS=Mus musculus GN=Poc1b PE=2 SV=1	Nuclear;	29.3419	29.3733	29.441	27.7225	27.8108	27.7442	28.3373	28.3718	27.7883	27.7071	27.7882	27.8868	2	28.4	150.89	5.738	-0.301881	0	102.76
Pg_S4503.7	Glycogen/starch synthases, ADP-glucose type	AT5G24300.1	Q935Y7	AT5G24300.1 | Symbols: SSI1, SSI, ATSS1 | Glycogen/starch synthases, ADP-glucose type | chr5:8266934-8270860 FORWARD LENGTH=652	Glycogen synthase OS=Synechococcus elongatus (strain PCC 7942) GN=glgA PE=3 SV=3	Cytoplasmic; Nuclear;	27.4745	27.4063	27.2863	26.6431	26.5904	26.0501	26.8193	28.3906	26.7266	26.1391	26.2747	26.5083	4	18.8	164.51	6.196	-0.481662	0	133.52
Pg_S6183.5	MLP-like protein 423	AT1G24020.1	P85524	AT1G24020.1 | Symbols: MLP423 | MLP-like protein 423 | chr1:8500653-8501458 REVERSE LENGTH=155	Kirola OS=Actinidia deliciosa PE=1 SV=1	Cytoplasmic; Chloroplast;	28.9432	28.9808	28.9704	32.1142	32.075	32.0516	31.1377	31.1935	31.2195	31.5636	31.6125	31.5637	9	69	16.541	4.222	0.146452	0	201.9
Pg_S4516.5	NAD-dependent malic enzyme 2	AT4G00570.1	P40375	AT4G00570.1 | Symbols: NAD-ME2 | NAD-dependent malic enzyme 2 | chr4:242817-246522 REVERSE LENGTH=607	NAD-dependent malic enzyme OS=Schizosaccharomyces pombe (strain 972 / ATCC 24843) GN=mae2 PE=1 SV=1	Mitochondrial;	27.6894	27.8986	27.7155	28.9236	28.9631	29.2417	28.1987	28.3924	28.0028	29.1575	29.1341	29.1255	4	45.2	66.766	6.736	-0.112086	0	116.58
Pg_S4527.8	Chaperone protein htpG family protein	AT4G24190.1	B0UN89	AT4G24190.1 | Symbols: SHD, HSP90.7, AtHsp90.7, AtHsp90-7 | Chaperone protein htpG family protein | chr4:12551902-12555851 REVERSE LENGTH=823	Chaperone protein HtpG OS=Methylobacterium sp. (strain 4-46) GN=htpG PE=3 SV=1	ER;	29.7405	29.8341	29.8424	30.5208	30.3953	30.4747	31.305	31.3691	31.3712	30.2977	30.1835	30.1833	3	45.9	93.207	4.741	-0.699631	0	323.31
Pg_S4554.9	alpha/beta-Hydrolases superfamily protein	AT4G16820.1	Q9P979	AT4G16820.1 | Symbols: PLA-I{beta]2 | alpha/beta-Hydrolases superfamily protein | chr4:9467563-9469116 FORWARD LENGTH=517	Feruloyl esterase A OS=Aspergillus awamori GN=faeA PE=1 SV=3	Nuclear;	26.203	25.5464	25.9308	26.3652	26.5534	26.7776	26.4628	26.3363	26.4531	25.608	25.3515	25.726	2	28.3	46.788	6.144	-0.527053	0	63.22
Pg_S4568.18	glyceraldehyde-3-phosphate dehydrogenase C2	AT1G13440.1	B1LDD2	AT1G13440.1 | Symbols: GAPC-2, GAPC2 | glyceraldehyde-3-phosphate dehydrogenase C2 | chr1:4608465-4610494 REVERSE LENGTH=338	D-erythrose-4-phosphate dehydrogenase OS=Escherichia coli (strain SMS-3-5 / SECEC) GN=epd PE=3 SV=1	Cytoplasmic;	27.0153	26.4759	27.024	27.5154	27.6581	27.8457	27.8401	27.7981	27.8121	27.0732	27.509	27.3241	2	57.8	36.785	8.09	-0.0784661	0	77.418
Pg_S4579.13	NDH-dependent cyclic electron flow 1	AT1G15980.1	-	AT1G15980.1 | Symbols: NDF1, NDH48 | NDH-dependent cyclic electron flow 1 | chr1:5489314-5491199 FORWARD LENGTH=461	-	Chloroplast;	29.0376	28.3507	28.8505	27.0324	26.9544	26.7119	26.6675	26.7175	26.5659	26.965	26.9811	26.8804	2	25.5	53.621	5.944	-0.249393	0	45.892
Pg_S4590.14	non-intrinsic ABC protein 7	AT3G10670.1	Q720M2	AT3G10670.1 | Symbols: ATNAP7, NAP7 | non-intrinsic ABC protein 7 | chr3:3335325-3337304 REVERSE LENGTH=338	Putative ABC transporter ATP-binding protein LMOf2365_1216 OS=Listeria monocytogenes serotype 4b (strain F2365) GN=LMOf2365_1216 PE=3 SV=1	Chloroplast;	24.8905	24.9767	24.6697	27.9588	27.7434	27.415	27.2426	27.2777	27.8206	27.649	26.7176	27.715	11	42.1	34.551	5.784	0.00791139	0	40.074
Pg_S4604.7	NAD(P)-binding Rossmann-fold superfamily protein	AT1G30620.1	Q31FG4	AT1G30620.1 | Symbols: HSR8, MUR4, UXE1 | NAD(P)-binding Rossmann-fold superfamily protein | chr1:10855496-10857970 FORWARD LENGTH=419	ADP-L-glycero-D-manno-heptose-6-epimerase OS=Thiomicrospira crunogena (strain XCL-2) GN=hldD PE=3 SV=1	Mitochondrial; Chloroplast;	28.6092	28.4649	28.518	29.598	29.452	29.5718	29.2758	29.262	29.1783	29.8438	29.8546	29.7858	6	41.6	43.258	6.884	-0.131328	0	104.86
Pg_S4616.10	Class II aaRS and biotin synthetases superfamily protein	AT5G52520.1	Q3A6R6	AT5G52520.1 | Symbols: OVA6, PRORS1 | Class II aaRS and biotin synthetases superfamily protein | chr5:21311112-21313875 FORWARD LENGTH=543	Proline--tRNA ligase OS=Pelobacter carbinolicus (strain DSM 2380 / Gra Bd 1) GN=proS PE=3 SV=1	Cytoplasmic; Chloroplast;	28.2636	28.2239	28.6455	27.6364	28.158	28.1519	27.527	27.0483	27.7147	28.5951	28.1035	27.9966	16	24	99.994	5.883	-0.203859	0	68.392
Pg_S4616.21	sedoheptulose-bisphosphatase	AT3G55800.1	Q2J1K3	AT3G55800.1 | Symbols: SBPASE | sedoheptulose-bisphosphatase | chr3:20709640-20711421 FORWARD LENGTH=393	Fructose-1,6-bisphosphatase class 1 OS=Rhodopseudomonas palustris (strain HaA2) GN=fbp PE=3 SV=1	Chloroplast;	33.4454	33.2628	33.2413	32.3984	32.4175	32.602	32.1527	32.2043	32.1985	32.527	32.4538	32.4349	1	49.7	42.441	5.869	-0.0464467	0	323.31
Pg_S4621.5	chlorophyll A/B binding protein 1	AT1G29930.1	Q9XF88	AT1G29930.1 | Symbols: CAB1, AB140, CAB140, LHCB1.3 | chlorophyll A/B binding protein 1 | chr1:10478071-10478874 FORWARD LENGTH=267	Chlorophyll a-b binding protein CP29.2, chloroplastic OS=Arabidopsis thaliana GN=LHCB4.2 PE=1 SV=1	Chloroplast;	31.8598	31.6851	32.4836	32.4435	32.3626	32.9098	34.5794	34.625	34.6691	33.3658	32.9801	33.0523	4	80.5	28.205	5.124	0.0165414	0	323.31
Pg_S4621.6	chlorophyll A/B binding protein 1	AT1G29930.1	Q9XF88	AT1G29930.1 | Symbols: CAB1, AB140, CAB140, LHCB1.3 | chlorophyll A/B binding protein 1 | chr1:10478071-10478874 FORWARD LENGTH=267	Chlorophyll a-b binding protein CP29.2, chloroplastic OS=Arabidopsis thaliana GN=LHCB4.2 PE=1 SV=1	Chloroplast;	27.4495	27.8177	27.7371	29.5989	29.6253	30.5388	30.7815	30.8418	30.0397	29.0163	29.4905	29.5767	1	81.3	27.804	4.849	0	0	104.11
Pg_S4650.8	1-deoxy-D-xylulose 5-phosphate reductoisomerase	AT5G62790.2	Q5F5X0	AT5G62790.2 | Symbols: DXR | 1-deoxy-D-xylulose 5-phosphate reductoisomerase | chr5:25214358-25217289 REVERSE LENGTH=497	1-deoxy-D-xylulose 5-phosphate reductoisomerase OS=Neisseria gonorrhoeae (strain ATCC 700825 / FA 1090) GN=dxr PE=3 SV=1	Cytoplasmic; Chloroplast;	27.672	27.69	27.6893	28.186	28.2416	28.1643	28.7083	28.6372	28.6385	28.0103	27.9352	27.9453	5	49.7	51.478	6.523	-0.0012685	0	106.27
Pg_S4658.18	isocitrate dehydrogenase V	AT5G03290.1	Q8PH05	AT5G03290.1 | Symbols: IDH-V | isocitrate dehydrogenase V | chr5:794043-795939 FORWARD LENGTH=374	3-isopropylmalate dehydrogenase OS=Xanthomonas axonopodis pv. citri (strain 306) GN=leuB PE=3 SV=1	Mitochondrial; Chloroplast;	28.2127	27.6514	28.0165	28.7602	28.9313	28.9184	28.036	27.9582	27.8931	28.7795	28.6416	28.7961	3	39	41.174	6.589	-0.159358	0	92.894
Pg_S4660.3	photosynthetic electron transfer C	AT4G03280.1	P49727	AT4G03280.1 | Symbols: PETC, PGR1 | photosynthetic electron transfer C | chr4:1440314-1441717 FORWARD LENGTH=229	Cytochrome b-c1 complex subunit Rieske, mitochondrial OS=Zea mays PE=2 SV=1	Chloroplast;	30.7747	30.8249	30.7895	30.1908	30.0989	30.2792	29.4839	29.3221	29.3924	31.6932	31.5778	31.4663	10	51.4	26.037	7.313	-0.130612	0	201.51
Pg_S4671.7	glutathione peroxidase 6	AT4G11600.1	O08368	AT4G11600.1 | Symbols: ATGPX6, PHGPX, LSC803, GPX6 | glutathione peroxidase 6 | chr4:7010021-7011330 REVERSE LENGTH=232	Glutathione peroxidase OS=Pseudomonas wisconsinensis GN=gpwA PE=3 SV=1	Cytoplasmic;	27.9001	27.7531	27.6693	26.8218	27.2576	27.4139	28.2624	28.2972	27.9779	29.4863	29.2039	29.3751	3	47.4	19.967	7.347	-0.341714	0	69.183
Pg_S4691.7	UDP-Glycosyltransferase superfamily protein	AT4G01070.1	P34317	AT4G01070.1 | Symbols: GT72B1, UGT72B1 | UDP-Glycosyltransferase superfamily protein | chr4:461858-463300 REVERSE LENGTH=480	Putative UDP-glucuronosyltransferase ugt-60 OS=Caenorhabditis elegans GN=ugt-60 PE=3 SV=2	Cytoplasmic; Chloroplast;	24.9899	24.9426	24.6509	25.5521	25.0593	25.2889	25.2056	25.129	25.0164	25.0405	25.0781	25.1351	6	23.3	41.522	5.884	-0.26748	0	18.692
Pg_S4695.7	20S proteasome beta subunit G1	AT1G56450.1	Q9VNA5	AT1G56450.1 | Symbols: PBG1 | 20S proteasome beta subunit G1 | chr1:21141970-21144186 FORWARD LENGTH=246	Proteasome subunit beta type-4 OS=Drosophila melanogaster GN=Prosbeta7 PE=2 SV=1	Cytoplasmic;	25.1037	25.0555	25.0941	28.9374	28.9455	28.6808	28.3508	28.1923	27.8995	28.6223	29.1299	28.7449	1	37	32.056	6.447	-0.244718	0	224.69
Pg_S4696.8	elicitor-activated gene 3-1	AT4G37980.1	P39714	AT4G37980.1 | Symbols: ELI3-1, ELI3, ATCAD7, CAD7 | elicitor-activated gene 3-1 | chr4:17852670-17854302 FORWARD LENGTH=357	(R,R)-butanediol dehydrogenase OS=Saccharomyces cerevisiae (strain ATCC 204508 / S288c) GN=BDH1 PE=1 SV=2	Cytoplasmic; Chloroplast;	30.344	30.4706	30.3951	29.7551	29.7252	29.7055	29.5279	29.5024	29.4632	29.6308	29.5599	29.6808	12	55.3	39.012	6.151	-0.0602778	0	284.96
Pg_S4696.9	elicitor-activated gene 3-2	AT4G37990.1	P22144	AT4G37990.1 | Symbols: ELI3-2, ELI3, ATCAD8, CAD-B2 | elicitor-activated gene 3-2 | chr4:17855964-17857388 FORWARD LENGTH=359	D-xylulose reductase OS=Scheffersomyces stipitis (strain ATCC 58785 / CBS 6054 / NBRC 10063 / NRRL Y-11545) GN=XYL2 PE=2 SV=1	Cytoplasmic;	30.667	30.471	30.495	30.4598	30.399	30.4152	31.2785	31.2321	31.3402	30.2162	30.0888	30.2241	16	75.2	35.495	5.934	-0.0400612	0	323.31
Pg_S4699.13	heat shock cognate protein 70-1	AT5G02500.1	P0CW13	AT5G02500.1 | Symbols: HSC70-1, HSP70-1, AT-HSC70-1, HSC70 | heat shock cognate protein 70-1 | chr5:554055-556334 REVERSE LENGTH=651	Chaperone protein DnaK OS=Methanosarcina mazei (strain ATCC BAA-159 / DSM 3647 / Goe1 / Go1 / JCM 11833 / OCM 88) GN=dnaK PE=3 SV=1	Cytoplasmic; Chloroplast;	27.9432	27.7905	28.0082	28.007	28.053	28.2437	29.5395	29.5001	29.5382	27.9485	27.7678	27.7365	7	64.2	71.158	4.894	-0.411883	0	187.83
Pg_S4720.1	B-S glucosidase 44	AT3G18080.1	Q8L6H7	AT3G18080.1 | Symbols: BGLU44 | B-S glucosidase 44 | chr3:6191586-6194124 FORWARD LENGTH=512	Beta-glucosidase-like SFR2, chloroplastic OS=Oryza sativa subsp. japonica GN=SFR2 PE=2 SV=1	Mitochondrial; Vacuole;	29.165	28.8312	28.8156	27.0618	27.1932	26.9578	29.3353	29.2107	29.0807	27.1569	27.2588	27.0802	17	44.9	59.423	9.128	-0.375435	0	180.46
Pg_S4733.14	multidrug resistance-associated protein 10	AT3G62700.1	P9WQJ0	AT3G62700.1 | Symbols: ATMRP10, MRP10, ABCC14 | multidrug resistance-associated protein 10 | chr3:23190428-23195727 REVERSE LENGTH=1539	Uncharacterized ABC transporter ATP-binding protein MT1311 OS=Mycobacterium tuberculosis (strain CDC 1551 / Oshkosh) GN=MT1311 PE=3 SV=1	Plasmamembrane;	26.606	25.9829	26.1785	26.3003	26.5277	26.5115	26.2024	26.3114	26.0401	26.3488	26.8697	26.153	3	11.8	146.95	6.581	0.0858015	0	31.717
Pg_S4761.3	2-cysteine peroxiredoxin B	AT5G06290.1	P44411	AT5G06290.1 | Symbols: 2-Cys Prx B, 2CPB | 2-cysteine peroxiredoxin B | chr5:1919380-1921211 FORWARD LENGTH=273	Putative peroxiredoxin bcp OS=Haemophilus influenzae (strain ATCC 51907 / DSM 11121 / KW20 / Rd) GN=bcp PE=3 SV=1	Chloroplast;	28.1669	28.4235	28.3546	31.5058	31.4922	31.5285	30.1495	30.032	29.9193	31.3111	31.243	31.3826	1	58.7	29.708	7.668	-0.151661	0	323.31
Pg_S4766.9	citrate synthase 2	AT3G58750.1	P83372	AT3G58750.1 | Symbols: CSY2 | citrate synthase 2 | chr3:21724564-21727458 REVERSE LENGTH=514	Citrate synthase, mitochondrial OS=Fragaria ananassa GN=MCSI PE=1 SV=1	Mitochondrial; Chloroplast; Peroxisomal	26.005	25.8206	25.8689	27.1486	27.4734	27.1186	26.5756	26.53	26.5216	27.3644	27.2973	27.1553	3	20.3	79.088	8.598	-0.103922	0	51.715
Pg_S4824.9	Heat shock protein 70 (Hsp 70) family protein	AT3G09440.1	Q83MH5	AT3G09440.1 | Symbols: | Heat shock protein 70 (Hsp 70) family protein | chr3:2903434-2905632 REVERSE LENGTH=649	Chaperone protein DnaK OS=Shigella flexneri GN=dnaK PE=3 SV=1	ER;	26.6925	26.8056	26.8797	26.1244	26.3803	26.5378	26.6303	26.7335	26.5622	26.7853	26.8009	26.5298	1	39.3	73.35	4.968	-0.450751	0	20.049
Pg_S4831.5	glutamine synthase clone R1	AT5G37600.1	Q9HU65	AT5G37600.1 | Symbols: ATGSR1, GLN1;1, GSR 1, ATGLN1;1 | glutamine synthase clone R1 | chr5:14933574-14935656 REVERSE LENGTH=356	Glutamine synthetase OS=Pseudomonas aeruginosa (strain ATCC 15692 / PAO1 / 1C / PRS 101 / LMG 12228) GN=glnA PE=1 SV=1	Cytoplasmic;	28.1594	28.046	27.9111	28.6957	28.5732	28.8417	28.4893	28.4421	28.429	28.2947	28.7987	28.8055	1	66.3	39.149	5.357	-0.386517	0	110.03
Pg_S4836.7	ATPase, AAA-type, CDC48 protein	AT5G03340.1	P46466	AT5G03340.1 | Symbols: | ATPase, AAA-type, CDC48 protein | chr5:810091-813133 REVERSE LENGTH=810	26S protease regulatory subunit 4 homolog OS=Oryza sativa subsp. japonica GN=TBP2 PE=2 SV=2	Cytoplasmic; Nuclear;	28.1204	28.283	27.889	27.47	27.2801	26.7631	26.3915	26.6695	26.4864	26.7991	27.1224	27.3853	9	36.9	90.626	4.912	-0.430061	0	37.541
Pg_S4841.3	proline-rich family protein	AT5G62640.3	-	AT5G62640.3 | Symbols: | proline-rich family protein | chr5:25149584-25152351 REVERSE LENGTH=540	-	Chloroplast; Nuclear;	29.439	29.6572	29.6409	28.1376	28.2163	28.3876	28.3388	28.379	28.3694	28.6215	28.7579	28.647	6	51	25.884	6.599	-0.368465	0	108.42
Pg_S4855.11	voltage dependent anion channel 1	AT3G01280.1	P07144	AT3G01280.1 | Symbols: VDAC1, ATVDAC1 | voltage dependent anion channel 1 | chr3:85754-87612 FORWARD LENGTH=276	Mitochondrial outer membrane protein porin OS=Neurospora crassa (strain ATCC 24698 / 74-OR23-1A / CBS 708.71 / DSM 1257 / FGSC 987) GN=B7H23.070 PE=2 SV=1	Mitochondrial;	28.9465	28.7882	28.9632	28.9759	29.1256	28.9199	29.4288	29.4188	29.4756	29.0282	28.9999	28.9077	7	37.5	36.698	8.669	-0.121829	0	166.46
Pg_S4885.2	nucleotide-rhamnose synthase/epimerase-reductase	AT1G63000.1	Q5UPS5	AT1G63000.1 | Symbols: NRS/ER, UER1 | nucleotide-rhamnose synthase/epimerase-reductase | chr1:23342510-23343859 FORWARD LENGTH=301	Uncharacterized protein L780 OS=Acanthamoeba polyphaga mimivirus GN=MIMI_L780 PE=4 SV=1	Cytoplasmic; Chloroplast;	26.5843	26.4691	26.136	25.9459	25.9502	25.9993	26.1489	26.3367	26.084	26.073	26.0057	25.8778	3	34.2	33.661	6.439	-0.276744	0	21.843
Pg_S4898.9	Metal-dependent protein hydrolase	AT5G41970.1	Q9PK08	AT5G41970.1 | Symbols: | Metal-dependent protein hydrolase | chr5:16791198-16792961 FORWARD LENGTH=373	UPF0160 protein TC_0665 OS=Chlamydia muridarum (strain MoPn / Nigg) GN=TC_0665 PE=3 SV=2	Mitochondrial; Chloroplast;	25.0558	25.6107	25.4592	25.7467	26.0156	26.1144	26.5582	26.7585	26.6625	26.0153	26.0483	25.9469	5	32	41.946	6.488	-0.248656	0	43.783
Pg_S4912.3	10-formyltetrahydrofolate synthetase	AT1G50480.1	Q1GE26	AT1G50480.1 | Symbols: THFS | 10-formyltetrahydrofolate synthetase | chr1:18702064-18704687 FORWARD LENGTH=634	Formate--tetrahydrofolate ligase OS=Ruegeria sp. (strain TM1040) GN=fhs PE=3 SV=1	Cytoplasmic; Mitochondrial;	31.3902	31.3123	31.3893	30.4955	30.4265	30.5328	30.007	30.0767	30.0279	30.3155	30.3404	30.3924	30	69.4	67.217	6.622	0.0173016	0	323.31
Pg_S4922.5	GroES-like zinc-binding alcohol dehydrogenase family protein	AT3G56460.1	B0BNC9	AT3G56460.1 | Symbols: | GroES-like zinc-binding alcohol dehydrogenase family protein | chr3:20933029-20934425 REVERSE LENGTH=348	Quinone oxidoreductase-like protein 2 OS=Rattus norvegicus PE=2 SV=1	Cytoplasmic; Mitochondrial; Chloroplast	29.5499	29.4044	29.2575	28.295	28.0967	28.221	27.9943	27.7716	27.3176	27.7362	27.644	27.7555	15	65.4	41.273	7.172	0.0260417	0	95.887
Pg_S4965.2	Phosphoenolpyruvate carboxylase family protein	AT2G43180.1	P46831	AT2G43180.1 | Symbols: | Phosphoenolpyruvate carboxylase family protein | chr2:17953719-17955774 REVERSE LENGTH=479	Isocitrate lyase OS=Mycobacterium leprae (strain TN) GN=aceA PE=3 SV=2	Chloroplast;	27.6938	27.7174	27.7796	27.8298	27.6253	27.9264	26.1735	26.199	26.1552	27.7336	27.521	27.2342	8	27.8	47.514	5.074	-0.200456	0	50.928
Pg_S4970.8	-	-	-	-	-	Cytoplasmic; Nuclear;	28.9451	28.8782	28.614	27.0666	27.0361	27.1563	26.3061	26.4126	26.0939	27.3623	27.386	27.5219	1	12.4	18.85	3.83	-0.735028	0	11.299
Pg_S4975.5	plastidic pyruvate kinase beta subunit 1	AT5G52920.1	P19680	AT5G52920.1 | Symbols: PKP1, PKP-BETA1, PKP2 | plastidic pyruvate kinase beta subunit 1 | chr5:21463680-21466612 FORWARD LENGTH=579	Pyruvate kinase (Fragment) OS=Spiroplasma citri GN=pyk PE=3 SV=1	Mitochondrial; Chloroplast;	25.1571	24.0469	24.1315	26.8528	26.3938	26.7331	27.8418	27.8075	27.9926	25.888	26.0506	25.8919	1	37.7	63.275	6.981	-0.145848	0	116.2
Pg_S4995.3	protochlorophyllide oxidoreductase C	AT1G03630.1	O74959	AT1G03630.1 | Symbols: POR C, PORC | protochlorophyllide oxidoreductase C | chr1:907699-909245 FORWARD LENGTH=401	Uncharacterized oxidoreductase C736.13 OS=Schizosaccharomyces pombe (strain 972 / ATCC 24843) GN=SPCC736.13 PE=3 SV=1	Mitochondrial; Chloroplast;	28.428	28.6287	28.6178	30.0392	29.8677	29.7019	29.5583	29.3923	29.3969	29.6042	29.5637	29.3786	7	42.9	43.287	8.742	-0.175439	0	100.94
Pg_S5009.4	chorismate synthase, putative / 5-enolpyruvylshikimate-3-phosphate phospholyase, putative	AT1G48850.1	B1KKS1	AT1G48850.1 | Symbols: EMB1144 | chorismate synthase, putative / 5-enolpyruvylshikimate-3-phosphate phospholyase, putative | chr1:18065154-18067956 REVERSE LENGTH=436	Chorismate synthase OS=Shewanella woodyi (strain ATCC 51908 / MS32) GN=aroC PE=3 SV=1	Chloroplast;	28.4114	27.7509	28.6105	27.6503	27.8247	27.7175	27.2709	27.7044	27.1617	26.7514	27.1282	27.5046	4	38.9	47.65	7.36	-0.292727	0	80.112
Pg_S5018.1	40s ribosomal protein SA B	AT3G04770.1	A8A8X0	AT3G04770.1 | Symbols: RPSAb | 40s ribosomal protein SA B | chr3:1309465-1310846 REVERSE LENGTH=332	30S ribosomal protein S2 OS=Ignicoccus hospitalis (strain KIN4/I / DSM 18386 / JCM 14125) GN=rps2 PE=3 SV=1	Cytoplasmic;	30.0623	30.0247	30.0924	29.3822	29.0563	29.3216	28.7454	28.6883	28.8727	29.7145	29.6167	29.77	3	38.7	33.047	4.756	-0.314333	0	203.05
Pg_S5025.12	stress-inducible protein, putative	AT4G12400.2	Q9XT11	AT4G12400.2 | Symbols: Hop3 | stress-inducible protein, putative | chr4:7338866-7341239 REVERSE LENGTH=558	Peptidyl-prolyl cis-trans isomerase FKBP5 OS=Aotus nancymaae GN=FKBP5 PE=2 SV=2	Cytoplasmic; Nuclear;	28.7387	28.6422	28.6354	29.1154	29.2062	29.1262	27.0484	26.8404	26.9337	30.0705	29.914	30.1132	6	22.1	114.05	5.931	-0.7445	0	85.848
Pg_S5447.4	3-ketoacyl-acyl carrier protein synthase III	AT1G62640.1	P99159	AT1G62640.1 | Symbols: KAS III | 3-ketoacyl-acyl carrier protein synthase III | chr1:23192502-23194737 FORWARD LENGTH=404	3-oxoacyl-[acyl-carrier-protein] synthase 3 OS=Staphylococcus aureus (strain N315) GN=fabH PE=1 SV=1	Chloroplast;	25.7211	25.9426	25.6242	25.534	26.0734	25.5649	25.7602	25.9842	26.3465	25.8521	25.7131	25.3968	2	24	42.562	5.883	-0.000990099	0	45.141
Pg_S5049.5	P-loop containing nucleoside triphosphate hydrolases superfamily protein	AT1G08410.1	A8GM60	AT1G08410.1 | Symbols: | P-loop containing nucleoside triphosphate hydrolases superfamily protein | chr1:2646307-2649106 FORWARD LENGTH=589	Probable GTP-binding protein EngB OS=Rickettsia akari (strain Hartford) GN=engB PE=3 SV=1	Cytoplasmic; Nuclear;	28.8457	28.8902	29.01	28.241	28.4529	28.2886	26.3756	26.2599	26.19	28.347	28.5615	28.5293	2	36	60.353	5.636	-0.228386	0	104.93
Pg_S5052.3	chloroplast RNA binding	AT1G09340.1	Q9LYA9	AT1G09340.1 | Symbols: CRB, CSP41B, HIP1.3 | chloroplast RNA binding | chr1:3015473-3018035 FORWARD LENGTH=378	Chloroplast stem-loop binding protein of 41 kDa a, chloroplastic OS=Arabidopsis thaliana GN=CSP41A PE=1 SV=1	Cytoplasmic; Mitochondrial;	26.3811	26.3131	26.2931	28.7261	28.9453	29.2269	28.1684	28.161	28.1582	28.8737	28.579	28.9281	4	67.9	42.495	8.589	-0.234211	0	58.851
Pg_S5093.9	Tetratricopeptide repeat (TPR)-like superfamily protein	AT5G41950.1	-	AT5G41950.1 | Symbols: | Tetratricopeptide repeat (TPR)-like superfamily protein | chr5:16785825-16789360 FORWARD LENGTH=565	-	Extracellular; Chloroplast;	23.5456	23.5386	23.3632	27.2834	27.4539	26.4093	26.4685	26.6857	26.4502	27.6619	27.5699	27.3234	4	33.9	23.889	5.252	-0.119824	0	81.795
Pg_S5098.7	ascorbate peroxidase 1	AT1G07890.3	P0CP57	AT1G07890.3 | Symbols: APX1, MEE6, CS1, ATAPX1, ATAPX01 | ascorbate peroxidase 1 | chr1:2438005-2439435 FORWARD LENGTH=250	Putative heme-binding peroxidase OS=Cryptococcus neoformans var. neoformans serotype D (strain B-3501A) GN=CNBE3880 PE=3 SV=1	Cytoplasmic;	31.8697	31.9383	32.0187	32.4876	32.3827	32.5728	31.3492	31.4757	31.3832	32.8962	32.7178	32.6752	3	73.6	27.511	5.613	-0.4252	0	323.31
Pg_S5120.7	BRI1 suppressor 1 (BSU1)-like 3	AT2G27210.1	Q9K907	AT2G27210.1 | Symbols: BSL3 | BRI1 suppressor 1 (BSU1)-like 3 | chr2:11630188-11636182 FORWARD LENGTH=1006	Bis(5'-nucleosyl)-tetraphosphatase PrpE [asymmetrical] OS=Bacillus halodurans (strain ATCC BAA-125 / DSM 18197 / FERM 7344 / JCM 9153 / C-125) GN=prpE PE=3 SV=1	Plasmamembrane; Cytoplasmic;	27.242	27.4827	27.5392	25.5809	25.1858	25.1593	26.1125	25.5125	25.9956	25.2407	25.2826	25.7124	2	24	106.54	5.577	-0.207708	0	42.387
Pg_S5121.1	acclimation of photosynthesis to environment	unknown	unknown	unknown	unknown	Plasmamembrane; Chloroplast;	25.0838	24.7419	24.7504	26.8624	27.0166	27.3452	26.7955	27.0163	27.0226	27.2068	27.7268	26.6176	9	31.3	30.692	6.962	0.0156584	0	56.049
Pg_S5121.3	general regulatory factor 3	AT5G38480.1	C6TH93	AT5G38480.1 | Symbols: GRF3, RCI1 | general regulatory factor 3 | chr5:15410277-15411285 FORWARD LENGTH=255	Casparian strip membrane protein 4 OS=Glycine max PE=2 SV=1	Cytoplasmic;	26.3586	26.5649	26.5915	27.5347	27.5859	27.4176	24.1134	25.0165	26.2542	30.1081	30.1431	30.2194	1	56.5	29.57	4.523	-0.404198	0	85.966
Pg_S5121.5	TCP-1/cpn60 chaperonin family protein	AT3G18190.1	Q6NF74	AT3G18190.1 | Symbols: | TCP-1/cpn60 chaperonin family protein | chr3:6232226-6233836 FORWARD LENGTH=536	60 kDa chaperonin 2 OS=Corynebacterium diphtheriae (strain ATCC 700971 / NCTC 13129 / Biotype gravis) GN=groL2 PE=3 SV=1	Cytoplasmic;	26.9686	26.7427	26.7657	28.4908	28.7391	28.6762	28.2035	28.3533	28.246	28.3634	28.6082	28.3366	1	46.2	73.966	5.958	-0.267922	0	132.01
Pg_S5125.4	isovaleryl-CoA-dehydrogenase	AT3G45300.1	Q9ZQP2	AT3G45300.1 | Symbols: IVD, ATIVD, IVDH | isovaleryl-CoA-dehydrogenase | chr3:16621659-16624848 REVERSE LENGTH=409	Putative peroxisomal acyl-coenzyme A oxidase 1.2 OS=Arabidopsis thaliana GN=ACX1.2 PE=2 SV=1	Mitochondrial;	25.0213	24.7564	24.9109	26.1537	25.9453	26.0386	25.0602	25.1767	25.1624	25.672	26.009	25.6771	5	18.5	44.856	6.783	-0.0924574	0	20.645
Pg_S5158.12	phosphoglycerate kinase 1	AT3G12780.1	C5BV35	AT3G12780.1 | Symbols: PGK1 | phosphoglycerate kinase 1 | chr3:4061127-4063140 REVERSE LENGTH=481	Phosphoglycerate kinase OS=Beutenbergia cavernae (strain ATCC BAA-8 / DSM 12333 / NBRC 16432) GN=pgk PE=3 SV=1	Chloroplast;	29.0801	29.0513	29.1441	31.9212	32.2497	32.049	30.3881	30.3936	30.7895	31.7804	31.3849	32.3228	6	65.9	56.255	8.253	0.0964353	0	197.18
Pg_S5162.5	carotenoid cleavage dioxygenase 1	AT3G63520.1	Q5RF16	AT3G63520.1 | Symbols: CCD1, ATCCD1, ATNCED1, NCED1 | carotenoid cleavage dioxygenase 1 | chr3:23452940-23455896 FORWARD LENGTH=538	Beta,beta-carotene 9',10'-oxygenase OS=Pongo abelii GN=BCO2 PE=2 SV=1	Cytoplasmic;	30.9455	30.9467	31.2099	30.3807	30.5407	30.2713	27.5802	27.2593	27.0117	30.5409	30.3369	30.1721	2	40	61.113	6.338	-0.266236	0	214.55
Pg_S5168.11	Prolyl oligopeptidase family protein	AT2G47390.1	P34422	AT2G47390.1 | Symbols: | Prolyl oligopeptidase family protein | chr2:19442278-19446253 REVERSE LENGTH=961	Dipeptidyl peptidase family member 6 OS=Caenorhabditis elegans GN=dpf-6 PE=3 SV=2	Cytoplasmic;	27.7489	27.4994	27.4706	27.2971	27.6142	27.3607	26.4903	26.5776	26.8202	26.9239	27.0323	26.8021	10	17.7	82.566	5.132	-0.322877	0	30.014
Pg_S5172.8	Protein of unknown function (DUF1350)	AT3G43540.1	-	AT3G43540.1 | Symbols: | Protein of unknown function (DUF1350) | chr3:15430770-15433035 FORWARD LENGTH=373	-	Plasmamembrane;	27.6685	26.9926	27.2037	28.1578	28.4292	28.558	26.66	26.4866	26.169	27.7251	27.8601	28.2127	3	31.7	48.995	6.757	-0.133105	0	57.847
Pg_S5196.13	aconitase 3	AT2G05710.1	P07264	AT2G05710.1 | Symbols: ACO3 | aconitase 3 | chr2:2141591-2146350 FORWARD LENGTH=990	3-isopropylmalate dehydratase OS=Saccharomyces cerevisiae (strain ATCC 204508 / S288c) GN=LEU1 PE=1 SV=3	Cytoplasmic;	27.306	26.7268	26.8865	26.9714	26.9544	26.9045	26.2707	26.0218	26.3696	26.6725	26.4791	26.5512	2	43.2	106.77	5.805	-0.21963	0	25.889
Pg_S5198.2	ascorbate peroxidase 1	AT1G07890.3	P0CP57	AT1G07890.3 | Symbols: APX1, MEE6, CS1, ATAPX1, ATAPX01 | ascorbate peroxidase 1 | chr1:2438005-2439435 FORWARD LENGTH=250	Putative heme-binding peroxidase OS=Cryptococcus neoformans var. neoformans serotype D (strain B-3501A) GN=CNBE3880 PE=3 SV=1	Cytoplasmic;	28.8247	28.7097	28.8206	28.5171	29.0957	28.9618	27.9379	27.79	27.3254	29.0439	29.1338	29.2177	5	53.6	27.671	5.612	-0.372	0	61.453
Pg_S5206.4	spermidine synthase 1	AT1G23820.1	Q8EZP1	AT1G23820.1 | Symbols: SPDS1 | spermidine synthase 1 | chr1:8420278-8422724 FORWARD LENGTH=378	Polyamine aminopropyl transferase 1 OS=Leptospira interrogans serogroup Icterohaemorrhagiae serovar Lai (strain 56601) GN=speE1 PE=3 SV=1	Cytoplasmic;	28.1885	28.4063	28.2726	27.4737	27.7099	27.5692	27.8573	27.5927	27.6679	27.501	27.4054	27.5647	2	61	36.388	4.833	0.0195195	0	109.5
Pg_S5206.6	aldehyde dehydrogenase 2B7	AT1G23800.1	Q8FHK7	AT1G23800.1 | Symbols: ALDH2B7, ALDH2B | aldehyde dehydrogenase 2B7 | chr1:8412238-8414804 REVERSE LENGTH=534	Gamma-aminobutyraldehyde dehydrogenase OS=Escherichia coli O6:H1 (strain CFT073 / ATCC 700928 / UPEC) GN=prr PE=3 SV=1	Cytoplasmic; Mitochondrial;	26.5642	27.0136	26.8802	27.2636	27.3043	27.5728	26.8748	26.3467	26.3864	27.5413	27.3577	27.5326	8	35	60.761	6.177	-0.145848	0	37.804
Pg_S5207.3	PDI-like 1-1	AT1G21750.1	Q9DGI3	AT1G21750.1 | Symbols: ATPDIL1-1, ATPDI5, PDI5, PDIL1-1 | PDI-like 1-1 | chr1:7645767-7648514 FORWARD LENGTH=501	Thioredoxin OS=Ictalurus punctatus GN=txn PE=3 SV=1	ER;	30.2715	30.0495	30.1982	27.948	27.9538	27.7253	28.4382	28.428	27.6457	28.1935	28.0807	27.7967	3	52.7	53.92	5.141	-0.0847737	0	65.365
Pg_S5214.1	oxidoreductase, zinc-binding dehydrogenase family protein	AT1G23740.1	B1IZH4	AT1G23740.1 | Symbols: | Oxidoreductase, zinc-binding dehydrogenase family protein | chr1:8398245-8399656 REVERSE LENGTH=386	L-threonine 3-dehydrogenase OS=Escherichia coli (strain ATCC 8739 / DSM 1576 / Crooks) GN=tdh PE=3 SV=1	Cytoplasmic; Chloroplast;	27.3121	27.2056	27.3399	28.7439	28.6739	28.9354	27.3935	27.5267	27.3605	28.5346	28.6567	28.6208	9	35.4	34.54	6.552	0.171077	0	34.244
Pg_S5274.12	Ribosomal protein L4/L1 family	AT3G09630.1	P14117	AT3G09630.1 | Symbols: | Ribosomal protein L4/L1 family | chr3:2953813-2955444 FORWARD LENGTH=406	60S ribosomal protein L4 (Fragment) OS=Xenopus tropicalis GN=rpl4 PE=3 SV=1	Mitochondrial;	29.7575	29.7135	29.7367	29.2218	29.3656	29.2691	29.796	29.8395	29.7519	29.9855	29.901	30.2493	4	43	45.128	10.84	-0.464792	0	237.26
Pg_S5275.1	2-phosphoglycolate phosphatase 1	AT5G36700.1	P94526	AT5G36700.1 | Symbols: ATPGLP1, PGLP1 | 2-phosphoglycolate phosphatase 1 | chr5:14421929-14424430 REVERSE LENGTH=362	Arabinose operon protein AraL OS=Bacillus subtilis (strain 168) GN=araL PE=2 SV=1	Chloroplast; Vacuole;	29.3668	29.5231	29.3108	30.5934	30.6579	30.5903	29.8694	29.8548	29.8879	30.2802	30.0999	30.2776	16	59.8	40.654	6.333	-0.141576	0	267.72
Pg_S5279.7	Phosphoglucomutase/phosphomannomutase family protein	AT1G70730.3	P18159	AT1G70730.3 | Symbols: PGM2 | Phosphoglucomutase/phosphomannomutase family protein | chr1:26669020-26673166 REVERSE LENGTH=662	Phosphoglucomutase OS=Bacillus subtilis (strain 168) GN=pgcA PE=1 SV=3	Cytoplasmic; Chloroplast;	28.121	27.7918	27.9035	27.6108	27.4658	27.505	27.2001	26.9771	27.3218	27.505	27.4946	27.3861	1	49.1	81.444	5.623	-0.171159	0	37.186
[truncated: 2,106 more rows]
