# Supplementary material for: Optimization of Protein Isolation and Label-Free Quantitative Proteomic Analysis in Four Different Tissues of Korean Ginseng
Source: Plants (Basel). 2021 Jul 9;10(7):1409. doi: 10.3390/plants10071409 (PMC8309323; doi:10.3390/plants10071409)
Supplement: Supplementary file 1 [file plants-10-01409-s001.zip › Table S2.xlsx]

## Sheet: Sample information
Table 1. Sample information
Replicates	Sample Info	Number of identified peptides	Number of identified unique peptides	Average sequence coverage/protein
Replicates_1	Fruit	18988	5960	13.93
	Leaf	28419	10508	20.08
	Root	26917	9887	18.82
	Shoot	30198	11269	20.96
Replicates_2	Fruit	18650	5907	13.75
	Leaf	28330	10433	20.06
	Root	26830	9812	18.75
	Shoot	30182	11239	20.98
Replicates_3	Fruit	18797	4764	13.84
	Leaf	28375	10499	20.03
	Root	26863	9861	18.77
	Shoot	29985	11133	20.89
Replicates_4	Fruit	18582	5809	13.7
	Leaf	28328	10457	20.07
	Root	26741	9826	18.73
	Shoot	30177	11246	20.96

## Sheet: List of identified proteins
Table 2. Significantly modulated proteins isolated from ginseng fruit, leaf, root, and shoot tissues using TCA/Acetone-MeOH/chloroform method
Ginseng ID	Protein name	[TAIR10]	[UniProt] ID	[TAIR10] Description	[UniProt] Description	intensity Fruit rep_1	intensity Fruit rep_2	intensity Fruit rep_3	intensity Fruit rep_4	intensity Leaf rep_1	intensity Leaf rep_2	intensity Leaf rep_3	intensity Leaf rep_4	intensity Root rep_1	intensity Root rep_2	intensity Root rep_3	intensity Root rep_4	intensity Shoot rep_1	intensity Shoot rep_2	intensity Shoot rep_3	intensity Shoot rep_4	Cluster	Unique peptides	Sequence coverage [%]	Mol. weight [kDa]	Q-value	Score	(-) log (Anova p-value)	ANOVA q-value
Pg_S1501.27	Octicosapeptide/Phox/Bem1p family protein	AT5G64430.1	unknown	AT5G64430.1 | Symbols: | Octicosapeptide/Phox/Bem1p family protein | chr5:25762540-25764081 REVERSE LENGTH=513	unknown	22.9908	27.5008	27.7703	27.2393	23.3999	22.7955	23.6175	23.0745	26.8811	23.2995	23.4381	26.8024	26.5353	27.2095	27.1339	27.1554	Cluster -1	6	17.7	65.114	0	13.974	1.68088	0.0240599
Pg_S1566.30	Aluminium induced protein with YGL and LRDR motifs	AT4G27450.1	Q10MX3	AT4G27450.1 | Symbols: | Aluminium induced protein with YGL and LRDR motifs | chr4:13727665-13728683 REVERSE LENGTH=250	Asparagine synthetase [glutamine-hydrolyzing] 1 OS=Oryza sativa subsp. japonica GN=Os03g0291500 PE=2 SV=1	25.1102	25.3397	25.2333	25.3116	24.8537	23.6163	24.7565	24.8585	24.3538	24.3275	24.3309	24.3672	24.882	25.1234	25.3987	25.1538	Cluster -1	4	40.2	26.934	0	11.009	2.3827	0.00524241
Pg_S4588.10	UDP-XYL synthase 5	AT3G46440.1	P75517	AT3G46440.1 | Symbols: UXS5 | UDP-XYL synthase 5 | chr3:17089268-17091611 REVERSE LENGTH=341	UDP-glucose 4-epimerase OS=Mycoplasma pneumoniae (strain ATCC 29342 / M129) GN=galE PE=3 SV=1	24.9498	24.274	24.6019	24.5847	23.9093	22.7792	24.2769	23.7866	24.1575	23.3853	24.1847	24.0341	25.1902	24.2648	24.4395	24.3527	Cluster -1	2	31.2	40.86	0	7.0625	1.49325	0.0364085
Pg_S2798.8	evolutionarily conserved C-terminal region 5	AT3G13060.2	Q9H6S0	AT3G13060.2 | Symbols: ECT5 | evolutionarily conserved C-terminal region 5 | chr3:4180625-4183632 FORWARD LENGTH=634	Probable ATP-dependent RNA helicase YTHDC2 OS=Homo sapiens GN=YTHDC2 PE=1 SV=2	24.7022	24.6453	24.6391	24.8699	24.0131	23.0606	24.0978	23.9289	23.9775	24.3654	22.9766	24.4082	24.1472	23.776	23.7056	24.0755	Cluster -1	3	4.7	71.845	0	7.497	1.43917	0.0409314
Pg_S0760.18	gamma tonoplast intrinsic protein	AT2G36830.1	C8ZJM1	AT2G36830.1 | Symbols: GAMMA-TIP, TIP1;1, GAMMA-TIP1 | gamma tonoplast intrinsic protein | chr2:15445490-15446336 FORWARD LENGTH=251	Aquaporin-1 OS=Saccharomyces cerevisiae (strain Lalvin EC1118 / Prise de mousse) GN=AQY1 PE=2 SV=1	28.5245	28.803	28.8271	28.8173	26.7187	23.3091	26.9318	26.7839	26.8071	27.0671	27.2682	27.3348	26.9451	27.3178	27.4601	27.3726	Cluster -1	1	10	25.555	0	21.185	2.16036	0.00853101
Pg_S0897.55	BRI1 suppressor 1 (BSU1)-like 2	AT1G08420.1	Q9LEV0	AT1G08420.1 | Symbols: BSL2 | BRI1 suppressor 1 (BSU1)-like 2 | chr1:2649959-2656564 FORWARD LENGTH=1018	Serine/threonine-protein phosphatase 7 inactive homolog OS=Arabidopsis thaliana GN=At5g10900 PE=3 SV=1	24.5436	24.7492	24.5653	24.1926	23.3369	22.2349	23.7888	24.0441	23.407	24.0301	23.3633	23.5754	24.2116	24.2754	24.2412	24.1434	Cluster -1	1	11.2	108.94	0	15.639	1.98096	0.0125101
Pg_S1620.1	Phosphate-responsive 1 family protein	AT4G08950.1	Q9SII5	AT4G08950.1 | Symbols: EXO | Phosphate-responsive 1 family protein | chr4:5740378-5741322 FORWARD LENGTH=314	Protein EXORDIUM-like 5 OS=Arabidopsis thaliana GN=EXL5 PE=2 SV=1	24.8641	25.5224	26.7763	25.5943	25.5895	25.5001	24.874	25.5737	24.3805	24.3267	23.2274	23.8671	24.6153	24.5651	25.104	24.6333	Cluster -1	4	18.2	33.698	0	16.638	2.60179	0.00323624
Pg_S0878.6	FMN binding	AT3G03890.1	unknown	AT3G03890.1 | Symbols: | FMN binding | chr3:999667-1001996 REVERSE LENGTH=321	unknown	23.5285	24.1835	25.7507	25.6434	25.4107	25.0435	25.0095	25.2364	23.5924	23.5672	22.0414	23.1284	23.5051	25.2091	25.3324	25.3593	Cluster -1	4	26.9	31.426	0	13.486	1.888	0.0153564
Pg_S3920.4	Reticulon family protein	AT5G58000.1	Q56X72	AT5G58000.1 | Symbols: | Reticulon family protein | chr5:23477416-23479496 FORWARD LENGTH=487	Reticulon-like protein B21 OS=Arabidopsis thaliana GN=RTNLB21 PE=2 SV=2	23.551	24.8472	25.229	24.476	23.7304	23.811	23.9184	23.9741	23.701	23.5943	23.5216	23.4692	23.454	23.5259	23.6009	23.6859	Cluster -1	1	11.4	22.028	0	6.8903	1.99628	0.0120965
Pg_S5052.8	non-intrinsic ABC protein 9	AT5G02270.2	P43569	AT5G02270.2 | Symbols: NAP9 | non-intrinsic ABC protein 9 | chr5:467269-469041 REVERSE LENGTH=354	CCR4-associated factor 16 OS=Saccharomyces cerevisiae (strain ATCC 204508 / S288c) GN=CAF16 PE=1 SV=1	24.2379	24.5836	24.3541	24.0293	23.3037	23.4914	23.9072	23.7761	23.3271	24.2246	22.1125	23.0245	23.9476	23.7215	23.8868	24.0172	Cluster -1	1	14.3	36.697	0	6.7461	1.45777	0.0393075
Pg_S0527.3	FK506-binding protein 12	AT5G64350.1	Q91DM0	AT5G64350.1 | Symbols: FKBP12, ATFKBP12 | FK506-binding protein 12 | chr5:25734810-25735990 REVERSE LENGTH=112	Genome polyprotein OS=Petunia vein clearing virus (isolate Shepherd) PE=3 SV=1	26.4939	26.905	26.7766	26.8028	26.1329	25.5695	25.7656	25.6594	21.8585	25.2856	22.2794	23.858	26.2862	25.3771	25.3764	23.9543	Cluster -1	2	26.8	12.04	0	7.1188	2.77853	0.00219051
Pg_S3109.4	purple acid phosphatase 10	AT2G16430.2	Q9ZQ81	AT2G16430.2 | Symbols: PAP10, ATPAP10 | purple acid phosphatase 10 | chr2:7120502-7122772 REVERSE LENGTH=468	Probable inactive purple acid phosphatase 9 OS=Arabidopsis thaliana GN=PAP9 PE=2 SV=1	25.7077	25.3221	25.2998	25.7008	25.2809	24.5278	24.5394	24.9294	23.1519	24.6955	23.1632	24.7811	24.8065	24.6663	24.9601	24.6836	Cluster -1	1	4.5	54.093	0	5.6841	2.08686	0.00994707
Pg_S5206.4	spermidine synthase 1	AT1G23820.1	Q8EZP1	AT1G23820.1 | Symbols: SPDS1 | spermidine synthase 1 | chr1:8420278-8422724 FORWARD LENGTH=378	Polyamine aminopropyl transferase 1 OS=Leptospira interrogans serogroup Icterohaemorrhagiae serovar Lai (strain 56601) GN=speE1 PE=3 SV=1	28.7948	29.1878	28.5413	28.8987	28.3572	28.4473	28.4416	28.4893	27.9669	27.9744	28.1102	28.0458	28.3188	28.3724	28.397	28.3319	Cluster -1	2	70.9	36.388	0	91.262	4.56107	4.5331e-05
Pg_S4616.10	Class II aaRS and biotin synthetases superfamily protein	AT5G52520.1	Q3A6R6	AT5G52520.1 | Symbols: OVA6, PRORS1 | Class II aaRS and biotin synthetases superfamily protein | chr5:21311112-21313875 FORWARD LENGTH=543	Proline--tRNA ligase OS=Pelobacter carbinolicus (strain DSM 2380 / Gra Bd 1) GN=proS PE=3 SV=1	27.0687	27.2005	27.1463	27.1781	26.6256	26.8806	26.9298	26.9339	26.0975	26.1323	26.1497	26.1348	26.74	26.7288	26.7908	26.6695	Cluster -1	12	16.1	99.994	0	47.675	8.15839	2.24034e-08
Pg_S2631.5	plasma membrane intrinsic protein 3	AT4G35100.1	Q8LAI1	AT4G35100.1 | Symbols: PIP3, PIP3A, PIP2;7, SIMIP | plasma membrane intrinsic protein 3 | chr4:16708672-16709958 FORWARD LENGTH=280	Probable aquaporin NIP7-1 OS=Arabidopsis thaliana GN=NIP7-1 PE=2 SV=2	26.4529	26.0886	26.2765	26.4438	24.4979	25.4601	25.297	25.6697	22.1671	22.7124	22.9764	24.508	24.9338	24.4852	24.4534	24.5338	Cluster -1	2	37.5	29.747	0	10.97	4.39466	6.49432e-05
Pg_S2464.7	SIT4 phosphatase-associated family protein	AT1G07990.1	unknown	AT1G07990.1 | Symbols: | SIT4 phosphatase-associated family protein | chr1:2477413-2482898 FORWARD LENGTH=802	unknown	24.0638	24.2389	23.6275	25.4086	22.4046	23.5922	24.3594	23.5141	22.1278	22.1791	22.0338	22.1711	23.9153	23.0867	23.0491	22.9927	Cluster -1	2	6.8	87.124	0.003847	2.8889	2.72347	0.00247537
Pg_S2259.12	exportin 1A	AT5G17020.1	Q54EV7	AT5G17020.1 | Symbols: XPO1A, ATCRM1, ATXPO1, XPO1, HIT2 | exportin 1A | chr5:5594904-5602467 FORWARD LENGTH=1075	Exportin-1 OS=Dictyostelium discoideum GN=xpo1 PE=3 SV=2	27.5946	27.5065	27.5559	27.5505	27.426	27.4347	27.4312	27.2606	26.9815	26.7089	27.0047	27.1178	27.2226	27.2735	27.28	27.3099	Cluster -1	8	22	123.85	0	59.972	4.77755	2.83787e-05
Pg_S2093.20	alpha/beta-Hydrolases superfamily protein	AT4G16820.1	Q9P979	AT4G16820.1 | Symbols: PLA-I{beta]2 | alpha/beta-Hydrolases superfamily protein | chr4:9467563-9469116 FORWARD LENGTH=517	Feruloyl esterase A OS=Aspergillus awamori GN=faeA PE=1 SV=3	28.9304	29.0443	29.0818	29.1936	28.4044	28.9552	28.9703	28.4735	28.2276	26.2395	25.9686	26.2807	28.4481	28.6511	28.5624	28.4847	Cluster -1	4	33.2	36.613	0	98.932	3.66389	0.000317876
Pg_S1590.6	aspartate aminotransferase 1	AT2G30970.1	Q01802	AT2G30970.1 | Symbols: ASP1 | aspartate aminotransferase 1 | chr2:13179012-13181686 FORWARD LENGTH=430	Aspartate aminotransferase, mitochondrial OS=Saccharomyces cerevisiae (strain ATCC 204508 / S288c) GN=AAT1 PE=1 SV=2	30.9656	30.5508	31.1183	31.0583	28.7846	29.5102	28.9111	29.4734	27.0629	27.2983	27.8886	27.748	29.7139	29.6537	29.6783	29.5787	Cluster -1	9	29.5	47.367	0	35.345	7.75807	5.12857e-08
Pg_S1273.1	phospholipase D alpha 2	AT1G52570.1	Q54Z25	AT1G52570.1 | Symbols: PLDALPHA2 | phospholipase D alpha 2 | chr1:19583940-19586551 REVERSE LENGTH=810	Phospholipase D C OS=Dictyostelium discoideum GN=pldC PE=3 SV=1	26.1298	26.191	26.2775	26.4022	25.8796	26.126	25.8257	25.9354	25.8142	25.427	25.4338	25.699	25.9183	25.9846	25.9375	26.2955	Cluster -1	2	65.9	91.966	0	14.516	3.19253	0.00088502
Pg_S0408.13	GTP binding Elongation factor Tu family protein	AT5G60390.1	A1UBL1	AT5G60390.1 | Symbols: | GTP binding Elongation factor Tu family protein | chr5:24289226-24290675 FORWARD LENGTH=449	Elongation factor Tu OS=Mycobacterium sp. (strain KMS) GN=tuf PE=3 SV=1	33.9431	33.9085	34.1425	34.081	33.5416	33.665	33.4848	33.6054	33.1671	33.0991	33.1713	33.135	33.5001	33.4125	33.4662	33.4633	Cluster -1	2	50.8	49.383	0	260.36	8.04484	2.82783e-08
Pg_S1066.20	Nuclear transport factor 2 (NTF2) family protein with RNA binding (RRM-RBD-RNP motifs) domain	AT3G25150.2	P97379	AT3G25150.2 | Symbols: | Nuclear transport factor 2 (NTF2) family protein with RNA binding (RRM-RBD-RNP motifs) domain | chr3:9157161-9160052 REVERSE LENGTH=587	Ras GTPase-activating protein-binding protein 2 OS=Mus musculus GN=G3bp2 PE=1 SV=2	26.3201	26.6547	26.5417	25.9542	25.671	25.9292	25.8696	25.6807	25.6399	25.5434	25.7055	24.8537	26.1223	25.8897	25.9183	25.9598	Cluster -1	4	15.5	54.306	0	25.351	2.60362	0.00322412
Pg_S7177.8	Late embryogenesis abundant protein, group 2	AT2G44060.1	P46519	AT2G44060.1 | Symbols: | Late embryogenesis abundant protein, group 2 | chr2:18226922-18227988 FORWARD LENGTH=325	Desiccation protectant protein Lea14 homolog OS=Glycine max PE=2 SV=1	28.7584	28.5726	28.545	28.6067	28.3326	28.2398	28.2485	28.1373	27.4529	27.4071	27.302	27.4872	28.357	28.4424	28.3667	28.4081	Cluster -1	2	60.5	35.293	0	73.295	9.63482	1.15479e-09
Pg_S5828.3	sodium/calcium exchanger family protein / calcium-binding EF hand family protein	AT1G53210.1	unknown	AT1G53210.1 | Symbols: | sodium/calcium exchanger family protein / calcium-binding EF hand family protein | chr1:19844790-19847533 FORWARD LENGTH=585	unknown	28.2463	28.0543	28.2332	28.1496	27.7353	27.8169	27.5361	27.3255	26.9432	26.8979	26.7538	26.7007	28.2813	28.3261	28.3901	28.3653	Cluster -1	1	18.9	49.987	0	47.328	8.14043	2.32718e-08
Pg_S4311.7	copper chaperone for SOD1	AT1G12520.1	Q6BZU2	AT1G12520.1 | Symbols: ATCCS, CCS | copper chaperone for SOD1 | chr1:4267277-4268900 REVERSE LENGTH=320	Superoxide dismutase 1 copper chaperone OS=Yarrowia lipolytica (strain CLIB 122 / E 150) GN=CCS1 PE=3 SV=1	26.2102	26.0896	26.5407	25.9507	25.4961	25.5025	25.3315	25.5513	22.5428	22.0513	22.7444	22.5516	25.8376	25.8384	25.7877	25.8224	Cluster -1	5	34.5	23.82	0	15.542	10.7263	1.31583e-10
Pg_S5398.15	PapD-like superfamily protein	AT4G21450.3	Q8LPQ7	AT4G21450.3 | Symbols: | PapD-like superfamily protein | chr4:11426136-11428125 FORWARD LENGTH=314	Vesicle-associated protein 4-3 OS=Arabidopsis thaliana GN=PVA43 PE=2 SV=1	24.4646	24.0361	25.0331	23.9791	24.1226	23.5154	23.8691	24.0129	22.5468	23.7658	22.2687	22.8777	24.7657	23.0144	25.065	24.7837	Cluster -1	2	13.9	30.143	0.0071755	2.4773	1.79219	0.0188685
Pg_S4142.10	MLP-like protein 31	AT1G70840.1	Q93VR4	AT1G70840.1 | Symbols: MLP31 | MLP-like protein 31 | chr1:26713170-26714014 REVERSE LENGTH=171	MLP-like protein 423 OS=Arabidopsis thaliana GN=MLP423 PE=2 SV=1	29.4036	29.4152	29.2418	29.4906	28.0807	28.1379	28.0937	28.1541	23.5815	22.4554	23.1115	22.5485	30.1174	30.3333	30.187	30.2364	Cluster -1	5	50	23.643	0	80.168	12.5145	4.04174e-12
Pg_S4021.14	ADP-ribosylation factor A1F	AT1G10630.1	Q54GY8	AT1G10630.1 | Symbols: ATARFA1F, ARFA1F | ADP-ribosylation factor A1F | chr1:3513189-3514230 REVERSE LENGTH=181	Ras-related protein Rab-18 OS=Dictyostelium discoideum GN=rab18 PE=3 SV=1	31.4736	31.4746	31.2763	31.5455	31.0009	31.0971	31.0911	30.9881	30.7053	30.5818	30.6395	30.5692	31.5541	31.5982	31.5873	31.5754	Cluster -1	2	74.5	21.084	0	165.36	8.89564	5.01372e-09
Pg_S3876.17	Glycosyl hydrolases family 32 protein	AT1G12240.1	Q04937	AT1G12240.1 | Symbols: ATBETAFRUCT4, VAC-INV | Glycosyl hydrolases family 32 protein | chr1:4153699-4157457 FORWARD LENGTH=664	Sucrose-6-phosphate hydrolase OS=Lactococcus lactis subsp. lactis GN=scrB PE=1 SV=1	30.2745	30.209	30.3435	30.2812	29.9566	29.9137	30.0601	29.8227	28.3605	28.3049	28.2344	28.4045	31.0276	31.0584	31.0771	31.0596	Cluster -1	11	31.1	72.512	0	99.031	14.2654	1.45447e-13
Pg_S3363.2	poly(A) binding protein 8	AT1G49760.1	Q8TBY0	AT1G49760.1 | Symbols: PAB8, PABP8 | poly(A) binding protein 8 | chr1:18416740-18419753 FORWARD LENGTH=671	Probable RNA-binding protein 46 OS=Homo sapiens GN=RBM46 PE=2 SV=1	29.7576	29.6696	29.6317	29.6872	29.3067	29.2898	29.2717	29.3431	28.9684	28.9727	28.8949	28.9309	29.5649	29.6596	29.6123	29.6249	Cluster -1	3	39.2	71.425	0	169.05	10.6617	1.49438e-10
Pg_S2504.7	Major facilitator superfamily protein	AT1G52190.1	A8AJB3	AT1G52190.1 | Symbols: | Major facilitator superfamily protein | chr1:19434671-19438673 FORWARD LENGTH=607	Dipeptide permease D OS=Citrobacter koseri (strain ATCC BAA-895 / CDC 4225-83 / SGSC4696) GN=dtpD PE=3 SV=1	25.1404	22.5147	24.5314	24.7477	24.2546	24.3061	24.3222	23.8062	22.873	23.3157	22.6608	22.3828	24.4849	24.5527	24.4165	24.4922	Cluster -1	3	10.8	52.599	0	9.544	1.9486	0.0134222
Pg_S5155.9	PDI-like 2-2	AT1G04980.1	P75512	AT1G04980.1 | Symbols: ATPDIL2-2, ATPDI10, PDI10, PDIL2-2 | PDI-like 2-2 | chr1:1413869-1416120 REVERSE LENGTH=447	Thioredoxin OS=Mycoplasma pneumoniae (strain ATCC 29342 / M129) GN=trxA PE=3 SV=1	27.958	28.0718	28.0291	27.9084	27.6182	27.6339	27.7343	27.7203	27.2059	27.3392	27.065	27.0842	27.7703	27.9225	27.9409	27.9014	Cluster -1	6	38.5	47.468	0	52.839	7.08695	2.09084e-07
Pg_S2229.7	unknown	unknown	unknown	unknown	unknown	28.1453	28.0706	28.3392	28.2886	25.013	23.2928	26.0082	24.8191	23.655	23.4381	23.0216	22.9022	27.4526	27.3956	27.3379	27.2911	Cluster -1	1	27.2	49.127	0	63.811	6.76333	4.13145e-07
Pg_S1769.27	lysophosphatidyl acyltransferase 2	AT3G57650.1	P32129	AT3G57650.1 | Symbols: LPAT2 | lysophosphatidyl acyltransferase 2 | chr3:21349751-21352839 FORWARD LENGTH=389	Probable acyltransferase YihG OS=Escherichia coli (strain K12) GN=yihG PE=1 SV=1	23.4853	24.0181	24.6324	24.5649	24.3108	24.2659	24.0188	24.3615	22.9405	23.8131	22.3218	22.8053	24.4501	24.7157	24.6106	24.5238	Cluster -1	2	7.8	42.54	0	6.5533	3.05225	0.00119961
Pg_S0917.21	Endomembrane protein 70 protein family	AT2G01970.1	P40071	AT2G01970.1 | Symbols: | Endomembrane protein 70 protein family | chr2:452197-454819 REVERSE LENGTH=592	Transmembrane 9 superfamily member 3 OS=Saccharomyces cerevisiae (strain ATCC 204508 / S288c) GN=TMN3 PE=1 SV=1	27.6137	27.1508	27.253	27.4257	26.7121	26.8503	26.8917	26.8901	25.9208	25.9308	25.6563	25.8503	27.5646	27.5637	27.626	27.6445	Cluster -1	4	12.9	118.87	0	68.363	8.99814	4.08776e-09
Pg_S6591.8	Ribosomal protein L32e	AT4G18100.1	P34040	AT4G18100.1 | Symbols: | Ribosomal protein L32e | chr4:10035715-10036475 REVERSE LENGTH=133	60S ribosomal protein L32 OS=Trichoderma harzianum GN=rpl32 PE=2 SV=1	28.2363	27.9628	27.8507	27.8566	27.6951	27.824	28.2231	27.7695	27.4532	27.476	27.4651	27.5056	27.9832	28.1515	28.0041	28.1049	Cluster -1	4	36.1	15.724	0	24.478	3.08292	0.001122
Pg_S0824.14	NB-ARC domain-containing disease resistance protein	AT1G10920.1	Q9FKZ0	AT1G10920.1 | Symbols: LOV1 | NB-ARC domain-containing disease resistance protein | chr1:3644587-3647004 REVERSE LENGTH=727	Probable disease resistance protein At5g66910 OS=Arabidopsis thaliana GN=At5g66910 PE=2 SV=1	24.4367	24.5958	25.3564	24.9098	24.6807	24.3754	22.5564	24.6258	22.8229	22.8099	23.225	23.2458	24.5769	24.5959	24.4683	24.5637	Cluster -1	3	4.7	112.8	0	8.2254	2.47866	0.00425524
Pg_S0544.25	cullin-associated and neddylation dissociated	AT2G02560.1	Q5BAH2	AT2G02560.1 | Symbols: CAND1, ATCAND1, ETA2, TIP120, HVE | cullin-associated and neddylation dissociated | chr2:690345-697342 FORWARD LENGTH=1219	Cullin-associated NEDD8-dissociated protein 1, C-terminal part OS=Emericella nidulans (strain FGSC A4 / ATCC 38163 / CBS 112.46 / NRRL 194 / M139) GN=candA-C PE=1 SV=1	27.6917	27.7542	27.7332	27.7367	27.3482	27.256	27.29	27.3393	27.0175	26.9399	26.8889	27.0709	27.5029	27.5546	27.533	27.5155	Cluster -1	6	13.2	127.42	0	40.458	9.389	1.86093e-09
Pg_S0475.11	Coatomer, beta subunit	AT4G31480.1	Q9U4N3	AT4G31480.1 | Symbols: | Coatomer, beta subunit | chr4:15264145-15267384 FORWARD LENGTH=948	Coatomer subunit beta OS=Toxoplasma gondii PE=2 SV=2	29.2452	29.1592	29.4841	29.2243	29.0928	29.1019	29.0705	29.0335	28.7072	28.563	28.6825	28.6211	29.5908	29.6677	29.5452	29.609	Cluster -1	7	44.5	105.88	0	211.14	7.83851	4.34967e-08
Pg_S0953.13	Glucose-1-phosphate adenylyltransferase family protein	AT4G39210.1	B5EUW3	AT4G39210.1 | Symbols: APL3 | Glucose-1-phosphate adenylyltransferase family protein | chr4:18260332-18263181 FORWARD LENGTH=521	Glucose-1-phosphate adenylyltransferase OS=Vibrio fischeri (strain MJ11) GN=glgC PE=3 SV=1	27.7038	28.2615	28.5594	28.5159	27.4538	27.5619	27.5331	27.4124	27.0142	27.0891	27.0399	27.1665	27.9713	28.0798	27.9174	27.9692	Cluster -1	1	34.1	39.711	0	56.251	4.81905	2.59291e-05
Pg_S0277.17	RNA-binding (RRM/RBD/RNP motifs) family protein	AT4G14300.1	Q6GLB5	AT4G14300.1 | Symbols: | RNA-binding (RRM/RBD/RNP motifs) family protein | chr4:8231179-8232785 FORWARD LENGTH=411	ELAV-like protein 1 OS=Xenopus tropicalis GN=elavl1 PE=2 SV=1	28.2245	28.4227	28.3722	28.1922	27.7351	27.7305	27.8206	27.7045	27.5003	27.5245	27.5299	27.3663	28.3123	28.2629	28.1923	28.2405	Cluster -1	1	32.8	49.687	0	93.048	8.23172	1.92443e-08
Pg_S3338.6	ADP-glucose pyrophosphorylase family protein	AT1G74910.1	Q9Y725	AT1G74910.1 | Symbols: | ADP-glucose pyrophosphorylase family protein | chr1:28135770-28138456 REVERSE LENGTH=415	Mannose-1-phosphate guanyltransferase 1 OS=Candida glabrata (strain ATCC 2001 / CBS 138 / JCM 3761 / NBRC 0622 / NRRL Y-65) GN=MPG1 PE=1 SV=1	27.6457	27.6094	27.0794	27.3405	27.2819	27.2187	27.1048	27.1166	26.8472	26.7813	26.9029	26.7339	27.5051	27.3172	27.3976	27.4629	Cluster -1	6	31.3	46.075	0	31.406	3.58086	0.000381179
Pg_S6326.7	Transducin family protein / WD-40 repeat family protein	AT4G33270.1	Q5IS43	AT4G33270.1 | Symbols: CDC20.1 | Transducin family protein / WD-40 repeat family protein | chr4:16044545-16046590 REVERSE LENGTH=457	Platelet-activating factor acetylhydrolase IB subunit alpha OS=Pan troglodytes GN=PAFAH1B1 PE=2 SV=3	26.0327	25.8269	25.7415	26.2346	23.5177	23.0465	25.8194	25.8124	23.653	23.5356	22.7138	25.6815	26.1458	26.2848	26.0184	26.2032	Cluster -1	4	51	32.644	0	21.33	1.75941	0.0202821
Pg_S4590.19	GroES-like zinc-binding alcohol dehydrogenase family protein	AT3G56460.1	B0BNC9	AT3G56460.1 | Symbols: | GroES-like zinc-binding alcohol dehydrogenase family protein | chr3:20933029-20934425 REVERSE LENGTH=348	Quinone oxidoreductase-like protein 2 OS=Rattus norvegicus PE=2 SV=1	24.4257	24.4471	24.623	23.8784	21.7834	24.1699	23.2266	23.7686	23.2388	23.0702	22.0707	23.1875	24.4589	24.506	24.3081	24.5262	Cluster -1	1	45.1	36.928	0	5.9432	2.13644	0.00896798
Pg_S2708.21	Phototropic-responsive NPH3 family protein	AT4G31820.1	Q9M2W8	AT4G31820.1 | Symbols: ENP, NPY1, MAB4 | Phototropic-responsive NPH3 family protein | chr4:15390788-15393627 REVERSE LENGTH=571	BTB/POZ domain-containing protein At3g49900 OS=Arabidopsis thaliana GN=At3g49900 PE=2 SV=1	23.6027	23.5415	24.0747	25.1087	22.2805	22.9837	23.4728	23.499	23.5404	22.3183	21.1566	22.931	24.3425	24.1831	24.1266	24.1653	Cluster -1	2	21	71.311	0	6.3787	1.95315	0.0132878
Pg_S3016.15	temperature-induced lipocalin	AT5G58070.1	P51910	AT5G58070.1 | Symbols: ATTIL, TIL | temperature-induced lipocalin | chr5:23500512-23501156 REVERSE LENGTH=186	Apolipoprotein D OS=Mus musculus GN=Apod PE=2 SV=1	25.1564	25.696	25.4859	25.3708	22.7572	23.1495	24.3219	25.874	24.429	21.7714	23.1447	23.0085	25.0345	24.9643	25.0169	25.0764	Cluster -1	2	19.1	20.613	0	6.9481	1.88869	0.0153509
Pg_S1202.7	Clp ATPase	AT5G51070.1	O15885	AT5G51070.1 | Symbols: ERD1, CLPD, SAG15 | Clp ATPase | chr5:20764479-20768481 FORWARD LENGTH=945	Heat shock protein 100 (Fragment) OS=Trypanosoma cruzi GN=HSP100 PE=3 SV=1	23.6483	23.6158	24.7999	24.2339	24.2011	24.0439	24.1081	24.2293	22.7141	21.3437	23.4437	23.457	22.8557	23.8865	23.6315	24.1292	Cluster -1	3	4.9	93.401	0	7.4033	1.50635	0.0354651
Pg_S2848.2	sorting nexin 2B	AT5G07120.1	Q91YJ2	AT5G07120.1 | Symbols: SNX2b | sorting nexin 2B | chr5:2207065-2209355 REVERSE LENGTH=572	Sorting nexin-4 OS=Mus musculus GN=Snx4 PE=2 SV=1	23.5539	22.8404	24.3788	23.1627	24.0401	23.6663	24.1091	22.5848	21.723	23.1837	23.3481	22.284	24.52	24.32	24.8304	24.7597	Cluster -1	2	7.8	60.016	0	8.2841	2.16081	0.00852569
Pg_S4990.1	RNA-binding (RRM/RBD/RNP motifs) family protein	AT4G14300.1	Q6GLB5	AT4G14300.1 | Symbols: | RNA-binding (RRM/RBD/RNP motifs) family protein | chr4:8231179-8232785 FORWARD LENGTH=411	ELAV-like protein 1 OS=Xenopus tropicalis GN=elavl1 PE=2 SV=1	25.0456	23.2887	23.958	23.2895	25.791	25.9826	25.6881	22.6733	22.7989	23.5784	23.6213	22.9643	25.8692	26.0149	25.8756	25.9271	Cluster -1	6	12.7	64	0	10.423	2.1936	0.00794307
Pg_S1237.8	Eukaryotic aspartyl protease family protein	AT1G25510.1	Q0IU52	AT1G25510.1 | Symbols: | Eukaryotic aspartyl protease family protein | chr1:8959372-8960823 REVERSE LENGTH=483	Aspartic proteinase Asp1 OS=Oryza sativa subsp. japonica GN=ASP1 PE=2 SV=1	26.002	24.3029	24.7802	23.9433	25.7409	25.8135	25.8606	23.6297	22.8379	23.097	24.1033	23.102	25.9051	26.1411	25.8579	25.959	Cluster -1	2	16.7	53.029	0	22.152	2.6495	0.00290863
Pg_S1637.40	Coatomer, alpha subunit	AT1G62020.1	Q8TAF3	AT1G62020.1 | Symbols: | Coatomer, alpha subunit | chr1:22919814-22923728 FORWARD LENGTH=1216	WD repeat-containing protein 48 OS=Homo sapiens GN=WDR48 PE=1 SV=1	24.1435	23.6433	24.045	23.6583	25.0016	25.1765	24.9704	22.7497	23.0237	25.0964	25.0043	24.0085	25.3762	25.8786	25.6357	25.4983	Cluster -1	2	38.9	135.93	0	26.137	1.34881	0.0497981
Pg_S3991.11	Cleavage/polyadenylation specificity factor, 25kDa subunit	AT4G25550.1	Q9CQF3	AT4G25550.1 | Symbols: | Cleavage/polyadenylation specificity factor, 25kDa subunit | chr4:13048519-13050873 FORWARD LENGTH=200	Cleavage and polyadenylation specificity factor subunit 5 OS=Mus musculus GN=Nudt21 PE=1 SV=1	24.941	22.8771	25.0013	24.089	23.0922	24.4631	25.5406	23.9549	23.4961	23.8976	23.8601	23.8756	25.627	25.5487	25.5892	25.5806	Cluster -1	2	18	18.648	0	11.61	1.66625	0.0248542
Pg_S6424.1	serine hydroxymethyltransferase 2	AT5G26780.3	Q9PET2	AT5G26780.3 | Symbols: SHM2 | serine hydroxymethyltransferase 2 | chr5:9418299-9421725 FORWARD LENGTH=533	Serine hydroxymethyltransferase OS=Xylella fastidiosa (strain 9a5c) GN=glyA PE=3 SV=2	27.2212	24.2473	26.7434	26.702	27.8088	27.9672	27.7998	27.915	27.628	27.5657	27.5357	27.6854	28.6797	28.7911	28.7789	28.5317	Cluster -1	1	57.1	57.589	0	100.74	2.7127	0.00253386
Pg_S5422.1	sucrose synthase 4	AT3G43190.1	A0JZ09	AT3G43190.1 | Symbols: SUS4, ATSUS4 | sucrose synthase 4 | chr3:15179204-15182577 REVERSE LENGTH=808	D-inositol 3-phosphate glycosyltransferase OS=Arthrobacter sp. (strain FB24) GN=mshA PE=3 SV=1	26.5351	24.0664	26.4035	26.6154	27.5307	27.4878	27.3743	27.3608	26.7946	26.9904	26.7563	26.9291	29.2134	29.2726	29.213	29.25	Cluster -1	1	54.5	94.482	0	30.226	4.29095	8.14613e-05
Pg_S2123.23	ARM repeat superfamily protein	AT2G45720.1	Q59MN0	AT2G45720.1 | Symbols: | ARM repeat superfamily protein | chr2:18834468-18836129 FORWARD LENGTH=553	Vacuolar protein 8 OS=Candida albicans (strain SC5314 / ATCC MYA-2876) GN=VAC8 PE=3 SV=3	24.1735	22.5049	24.0703	23.8928	24.0325	23.5786	23.8335	24.0702	23.7489	23.8548	23.8761	23.7695	24.8563	24.8325	25.086	24.8006	Cluster -1	4	27.4	110.79	0	24.635	2.35302	0.00557909
Pg_S2744.3	UDP-D-apiose/UDP-D-xylose synthase 2	AT1G08200.1	Q9LZI2	AT1G08200.1 | Symbols: AXS2 | UDP-D-apiose/UDP-D-xylose synthase 2 | chr1:2574259-2576609 REVERSE LENGTH=389	UDP-glucuronic acid decarboxylase 2 OS=Arabidopsis thaliana GN=UXS2 PE=1 SV=1	24.837	23.5071	24.586	25.4937	25.5757	25.7098	25.4738	25.6847	24.7371	24.7059	24.8605	24.8343	26.1063	26.6357	25.9667	26.5006	Cluster -1	4	55.5	43.689	0	17.961	3.24374	0.000791859
Pg_S1400.29	S-adenosylmethionine synthetase 1	AT1G02500.1	B4THH4	AT1G02500.1 | Symbols: SAM1, SAM-1, MAT1, AtSAM1 | S-adenosylmethionine synthetase 1 | chr1:519037-520218 FORWARD LENGTH=393	S-adenosylmethionine synthase OS=Salmonella heidelberg (strain SL476) GN=metK PE=3 SV=1	26.6942	23.485	26.7725	26.9563	27.7162	27.5301	27.5967	28.7183	23.233	26.6253	26.5923	26.6577	28.0948	28.1357	28.1515	28.1032	Cluster -1	1	69.8	42.717	0	7.6719	1.49029	0.0366286
Pg_S0622.13	hydroxycinnamoyl-CoA shikimate/quinate hydroxycinnamoyl transferase	AT5G48930.1	Q8W1W9	AT5G48930.1 | Symbols: HCT | hydroxycinnamoyl-CoA shikimate/quinate hydroxycinnamoyl transferase | chr5:19836654-19838092 REVERSE LENGTH=433	Malonyl-coenzyme:anthocyanin 5-O-glucoside-6'''-O-malonyltransferase OS=Salvia splendens GN=5MAT1 PE=1 SV=1	22.988	24.0238	24.2125	23.5509	23.4656	23.487	23.0411	23.1365	22.9703	22.0217	22.4391	23.8578	26.205	22.7184	26.2375	26.2713	Cluster -1	1	39.9	31.107	0	5.5377	1.69283	0.0234439
Pg_S7633.5	Aha1 domain-containing protein	AT3G12050.1	P53834	AT3G12050.1 | Symbols: | Aha1 domain-containing protein | chr3:3839289-3841303 FORWARD LENGTH=360	Hsp90 co-chaperone HCH1 OS=Saccharomyces cerevisiae (strain ATCC 204508 / S288c) GN=HCH1 PE=1 SV=1	27.949	28.1931	28.1263	27.859	27.1867	27.5298	27.3264	26.8735	27.3915	27.4788	27.5027	27.3096	28.1027	27.9844	28.1647	28.0643	Cluster -1	1	27.7	39.474	0	56.434	4.8114	2.63281e-05
Pg_S7478.3	ubiquitin-specific protease 12	AT5G06600.1	unknown	AT5G06600.1 | Symbols: UBP12 | ubiquitin-specific protease 12 | chr5:2019545-2027834 REVERSE LENGTH=1116	unknown	28.3291	28.4738	28.1964	28.1223	27.7563	27.848	27.6181	27.443	27.7858	27.7634	27.8388	27.8648	28.2674	28.2785	28.326	28.2969	Cluster -1	1	26.7	136.86	0	110.16	5.01759	1.69375e-05
Pg_S5036.16	actin 7	AT5G09810.1	P27131	AT5G09810.1 | Symbols: ACT7 | actin 7 | chr5:3052809-3054220 FORWARD LENGTH=377	Actin-1 OS=Naegleria fowleri PE=2 SV=2	26.6012	26.3839	26.2546	26.359	23.6223	23.7031	25.787	22.3764	22.6785	26.1572	26.1396	22.8888	26.7361	26.8215	27.5995	26.7643	Cluster -1	2	66.3	41.701	0	15.19	2.00759	0.011815
Pg_S2350.4	Phosphofructokinase family protein	AT1G12000.1	O51669	AT1G12000.1 | Symbols: | Phosphofructokinase family protein | chr1:4050159-4053727 REVERSE LENGTH=566	ATP-dependent 6-phosphofructokinase OS=Borrelia burgdorferi (strain ATCC 35210 / B31 / CIP 102532 / DSM 4680) GN=pfkA PE=3 SV=2	25.9849	26.3496	26.6694	26.0655	25.0895	25.5513	25.3151	25.3214	25.9943	25.884	25.6047	26.0508	26.6606	26.5127	26.6529	26.4322	Cluster -1	3	42.4	61.461	0	19.153	4.73813	3.08101e-05
Pg_S5316.2	plasma membrane intrinsic protein 1;4	AT4G00430.1	O86231	AT4G00430.1 | Symbols: TMP-C, PIP1;4, PIP1E | plasma membrane intrinsic protein 1;4 | chr4:186143-187531 REVERSE LENGTH=287	Uncharacterized aquaporin-like protein HI_1017 OS=Haemophilus influenzae (strain ATCC 51907 / DSM 11121 / KW20 / Rd) GN=HI_1017 PE=3 SV=1	24.864	27.4367	27.4155	27.3262	23.7179	23.2402	22.8134	24.0392	22.4961	26.4285	26.3754	23.3618	27.1053	27.1974	27.2323	26.9584	Cluster -1	2	44.9	30.809	0	9.7661	2.47525	0.00428686
Pg_S7856.6	ARM repeat superfamily protein	AT2G45720.1	Q59MN0	AT2G45720.1 | Symbols: | ARM repeat superfamily protein | chr2:18834468-18836129 FORWARD LENGTH=553	Vacuolar protein 8 OS=Candida albicans (strain SC5314 / ATCC MYA-2876) GN=VAC8 PE=3 SV=3	28.6508	28.7	28.615	28.5529	27.8476	27.9312	27.7521	27.7897	27.8245	27.941	27.9672	27.7217	28.697	28.8129	28.6415	28.8366	Cluster -1	2	40.3	96.979	0	108.27	8.5203	1.07557e-08
Pg_S7150.5	rotamase CYP 3	AT2G16600.1	Q4R713	AT2G16600.1 | Symbols: ROC3 | rotamase CYP 3 | chr2:7200862-7201383 FORWARD LENGTH=173	Peptidyl-prolyl cis-trans isomerase CWC27 homolog OS=Macaca fascicularis GN=CWC27 PE=2 SV=1	32.2441	32.1939	32.2137	32.2644	31.7589	31.8592	31.7994	31.6631	31.8284	31.8725	31.81	31.7108	32.5136	32.5106	32.5528	32.5265	Cluster -1	4	68.6	17.993	0	112.96	9.26627	2.39693e-09
Pg_S5838.4	serine hydroxymethyltransferase 4	AT4G13930.1	B4TDC8	AT4G13930.1 | Symbols: SHM4 | serine hydroxymethyltransferase 4 | chr4:8048013-8050021 REVERSE LENGTH=471	Serine hydroxymethyltransferase OS=Salmonella heidelberg (strain SL476) GN=glyA PE=3 SV=1	32.513	32.5383	32.537	32.5591	31.9093	31.9288	31.9599	31.9268	32.0771	32.0488	32.082	32.0871	32.6644	32.725	32.6419	32.6589	Cluster -1	5	80.1	49.213	0	323.31	13.5005	5.8853e-13
Pg_S5503.6	unknown	unknown	unknown	unknown	unknown	29.3139	29.4962	29.5411	29.2815	29.0079	29.0254	29.0743	29.0548	28.7929	28.7294	28.6771	28.7712	29.5879	29.6392	29.7575	29.7099	Cluster -1	6	38.2	58.533	0	151.79	8.10853	2.48244e-08
Pg_S5231.1	SAD1/UNC-84 domain protein 1	AT5G04990.1	Q558Z2	AT5G04990.1 | Symbols: SUN1, ATSUN1 | SAD1/UNC-84 domain protein 1 | chr5:1471698-1473770 REVERSE LENGTH=471	Sun domain-containing protein 1 OS=Dictyostelium discoideum GN=sun1 PE=1 SV=1	27.2991	27.241	27.4391	27.2657	26.681	26.8118	26.8511	26.9207	26.9432	27.1208	26.922	26.8898	27.4983	27.5429	27.5802	27.5212	Cluster -1	7	23	47.125	0	34.125	6.63609	5.42123e-07
Pg_S4883.11	Cyclophilin-like peptidyl-prolyl cis-trans isomerase family protein	AT4G33060.1	P52015	AT4G33060.1 | Symbols: | Cyclophilin-like peptidyl-prolyl cis-trans isomerase family protein | chr4:15948535-15951954 FORWARD LENGTH=504	Peptidyl-prolyl cis-trans isomerase 7 OS=Caenorhabditis elegans GN=cyn-7 PE=1 SV=2	24.7975	23.7764	24.3601	24.8568	22.7932	22.9596	22.5303	23.9494	23.2954	22.9182	22.774	23.8572	25.1322	25.3504	25.073	25.0476	Cluster -1	3	22.1	26.578	0	11.039	4.03839	0.000141213
Pg_S4458.1	RNA-binding (RRM/RBD/RNP motifs) family protein	AT4G14300.1	Q6GLB5	AT4G14300.1 | Symbols: | RNA-binding (RRM/RBD/RNP motifs) family protein | chr4:8231179-8232785 FORWARD LENGTH=411	ELAV-like protein 1 OS=Xenopus tropicalis GN=elavl1 PE=2 SV=1	28.7991	29.0183	28.7872	28.8965	28.5148	28.5703	28.6174	28.4675	28.537	28.6151	28.4981	28.51	29.256	29.2741	29.3063	29.2454	Cluster -1	9	38.7	41.766	0	114.58	8.03051	2.91641e-08
Pg_S3718.2	unknown	unknown	unknown	unknown	unknown	24.353	25.3802	24.6775	23.7251	22.2196	22.7163	23.7803	23.3076	23.0299	23.4641	22.5991	22.9919	24.6783	25.0069	24.9811	25.028	Cluster -1	2	4.9	72.099	0	5.0981	3.60252	0.000363914
Pg_S3182.6	neurofilament protein-related	AT3G05900.1	unknown	AT3G05900.1 | Symbols: | neurofilament protein-related | chr3:1761408-1763854 REVERSE LENGTH=673	unknown	28.8054	28.5738	28.6661	28.8815	28.0292	28.2124	28.0855	27.9358	28.3543	28.2511	28.2074	28.1458	28.7816	28.998	28.9518	28.8758	Cluster -1	2	29.2	69.636	0	58.796	6.38277	9.22124e-07
Pg_S3026.2	Transducin family protein / WD-40 repeat family protein	AT4G33270.1	Q5IS43	AT4G33270.1 | Symbols: CDC20.1 | Transducin family protein / WD-40 repeat family protein | chr4:16044545-16046590 REVERSE LENGTH=457	Platelet-activating factor acetylhydrolase IB subunit alpha OS=Pan troglodytes GN=PAFAH1B1 PE=2 SV=3	28.659	28.6168	28.7067	28.6245	28.2802	28.3192	28.3525	28.2848	28.2617	28.3694	28.3013	28.2186	28.8753	28.9436	28.9725	28.9551	Cluster -1	9	21.7	120.56	0	112.67	9.44242	1.67453e-09
Pg_S2618.9	phospholipase C 2	AT3G08510.1	Q9BRC7	AT3G08510.1 | Symbols: ATPLC2, PLC2 | phospholipase C 2 | chr3:2582626-2585556 REVERSE LENGTH=581	1-phosphatidylinositol 4,5-bisphosphate phosphodiesterase delta-4 OS=Homo sapiens GN=PLCD4 PE=1 SV=1	28.123	28.2802	28.2994	28.5734	27.8654	27.5817	27.5658	27.4809	27.6972	27.7352	27.4577	27.286	28.4361	28.6991	28.598	28.6197	Cluster -1	2	33.4	67.548	0	50.814	5.51527	5.84356e-06
Pg_S2499.11	unknown	unknown	unknown	unknown	unknown	29.8216	29.7561	29.5934	29.6744	29.2221	29.1651	29.1568	29.3862	29.0548	29.0104	29.0448	29.0068	30.0643	30.1447	30.0278	30.1611	Cluster -1	5	43	106.74	0	167.1	8.94405	4.54059e-09
Pg_S2000.5	RAB GTPase homolog 1C	AT4G17530.1	Q9VP48	AT4G17530.1 | Symbols: RAB1C, ATRAB1C, ATRABD2C | RAB GTPase homolog 1C | chr4:9773721-9775424 REVERSE LENGTH=202	Ras-related protein Rab-26 OS=Drosophila melanogaster GN=Rab26 PE=2 SV=2	28.5	28.4715	28.457	28.5956	28.1999	28.2484	28.272	28.3059	28.2612	28.1229	28.2975	28.1718	28.7483	28.9162	28.8961	28.8425	Cluster -1	2	48.8	22.619	0	41.551	7.3619	1.16663e-07
Pg_S1499.16	Clathrin light chain protein	AT2G20760.1	Q6Z3A8	AT2G20760.1 | Symbols: | Clathrin light chain protein | chr2:8943279-8945108 REVERSE LENGTH=338	Clathrin light chain 3 OS=Oryza sativa subsp. japonica GN=Os07g0461500 PE=3 SV=1	24.0631	24.3047	23.9747	23.8499	23.1428	22.8296	22.6633	22.8553	23.4166	23.2343	23.3839	23.3059	25.0526	24.8177	24.8487	25.0158	Cluster -1	2	34.1	36.032	0	5.731	8.74758	6.73836e-09
Pg_S1272.1	subunit of exocyst complex 8	AT3G10380.1	Q93YU5	AT3G10380.1 | Symbols: SEC8, ATSEC8 | subunit of exocyst complex 8 | chr3:3219922-3228356 REVERSE LENGTH=1053	Exocyst complex component SEC8 OS=Arabidopsis thaliana GN=SEC8 PE=1 SV=1	25.1352	25.589	24.8937	24.8447	24.3764	24.3074	24.56	24.3782	24.5758	23.8947	24.0336	24.1688	25.605	25.0378	25.0662	25.1934	Cluster -1	6	10.3	119.95	0	17.872	3.68988	0.000300935
Pg_S1058.4	Phosphofructokinase family protein	AT1G12000.1	O51669	AT1G12000.1 | Symbols: | Phosphofructokinase family protein | chr1:4050159-4053727 REVERSE LENGTH=566	ATP-dependent 6-phosphofructokinase OS=Borrelia burgdorferi (strain ATCC 35210 / B31 / CIP 102532 / DSM 4680) GN=pfkA PE=3 SV=2	30.0714	30.085	29.933	29.8039	29.3505	29.3354	29.4141	29.2768	29.3345	29.3772	29.3924	29.4502	30.2103	30.2189	30.2338	30.2338	Cluster -1	4	65.5	61.198	0	215.25	8.7166	7.17134e-09
Pg_S0786.28	regulatory particle triple-A ATPase 3	AT5G58290.1	D3FFN2	AT5G58290.1 | Symbols: RPT3 | regulatory particle triple-A ATPase 3 | chr5:23569155-23571116 FORWARD LENGTH=408	ATP-dependent zinc metalloprotease FtsH OS=Mycoplasma gallisepticum (strain R(high / passage 156)) GN=ftsH PE=3 SV=1	29.3782	29.285	29.2401	29.1783	28.8525	28.9125	28.9938	28.8701	28.9346	28.9911	29.1054	28.899	29.6307	29.6596	29.6425	29.6746	Cluster -1	14	68.8	46.807	0	190.7	7.85579	4.21498e-08
Pg_S0635.5	pfkB-like carbohydrate kinase family protein	AT5G58730.1	unknown	AT5G58730.1 | Symbols: | pfkB-like carbohydrate kinase family protein | chr5:23723627-23725324 REVERSE LENGTH=353	unknown	27.7152	27.8769	28.1314	28.0391	24.4588	23.443	25.1033	24.9879	25.1602	24.5456	25.4624	24.9281	30.9877	30.9884	31.0205	30.9173	Cluster -1	4	80.4	34.41	0	226.78	9.63182	1.16028e-09
Pg_S5818.1	tubulin beta 8	AT5G23860.1	P33623	AT5G23860.1 | Symbols: TUB8 | tubulin beta 8 | chr5:8042962-8044528 FORWARD LENGTH=449	Tubulin alpha-1 chain OS=Anemia phyllitidis GN=TUBA1 PE=2 SV=1	30.2047	30.3252	30.2185	30.2381	29.7067	29.5243	29.6093	29.8491	29.1817	29.176	29.1425	29.0424	30.8706	30.7591	30.8435	30.8859	Cluster -1	2	76.2	49.981	0	102.14	10.734	1.29602e-10
Pg_S0431.81	unknown	unknown	unknown	unknown	unknown	24.7093	23.7933	23.7402	23.7547	22.5618	23.2146	23.862	23.3096	23.3281	23.0389	22.7122	23.2331	24.9982	24.7526	24.8675	24.8441	Cluster -1	3	4.2	143.87	0	18.088	4.02487	0.000145447
Pg_S2935.3	Protein kinase superfamily protein	AT2G24360.1	P54757	AT2G24360.1 | Symbols: | Protein kinase superfamily protein | chr2:10364742-10366075 REVERSE LENGTH=411	Ephrin type-A receptor 5 OS=Rattus norvegicus GN=Epha5 PE=1 SV=1	26.7539	26.2381	26.2276	26.2374	24.8529	24.8292	25.2068	25.4521	25.3175	25.2239	25.7824	25.7135	26.4052	26.499	26.599	26.7774	Cluster -1	4	22.9	40.079	0	28.736	5.15347	1.26399e-05
Pg_S0524.17	vacuolar protein sorting 41	AT1G08190.1	Q03656	AT1G08190.1 | Symbols: ATVPS41, ZIP2, VPS41, ATVAM2, VAM2 | vacuolar protein sorting 41 | chr1:2567652-2573142 FORWARD LENGTH=980	Serine/threonine-protein kinase SKY1 OS=Saccharomyces cerevisiae (strain ATCC 204508 / S288c) GN=SKY1 PE=1 SV=1	25.0326	24.4147	23.7091	23.6916	24.116	22.6266	23.4569	22.8168	22.85	24.2819	22.323	24.2804	24.4865	24.9572	24.6779	24.6676	Cluster -1	1	11.3	69.802	0	8.3601	1.40493	0.0441178
Pg_S0544.3	FAD-binding Berberine family protein	AT4G20840.1	P93762	AT4G20840.1 | Symbols: | FAD-binding Berberine family protein | chr4:11157916-11159535 FORWARD LENGTH=539	Hexose oxidase OS=Chondrus crispus GN=HOX PE=1 SV=2	25.6864	25.3198	25.2085	25.2782	23.5869	23.9644	22.3943	22.1898	22.6825	24.2798	23.5139	24.3285	26.3685	25.7165	25.9618	25.9015	Cluster -1	6	13.2	60.153	0	29.621	4.306	7.88175e-05
Pg_S6471.7	RNA binding (RRM/RBD/RNP motifs) family protein	AT5G16260.1	O13845	AT5G16260.1 | Symbols: ELF9 | RNA binding (RRM/RBD/RNP motifs) family protein | chr5:5311363-5315496 FORWARD LENGTH=519	RNA-binding protein rsd1 OS=Schizosaccharomyces pombe (strain 972 / ATCC 24843) GN=rsd1 PE=1 SV=2	23.074	24.7883	23.6087	23.5121	23.7534	23.2292	23.3461	23.2488	22.9132	23.769	23.6613	23.7643	24.5109	24.7601	24.812	24.6745	Cluster -1	1	5.2	28.682	0	4.6192	2.24609	0.00708732
Pg_S4793.5	vesicle-associated membrane protein 726	AT1G04760.1	P63024	AT1G04760.1 | Symbols: ATVAMP726, VAMP726 | vesicle-associated membrane protein 726 | chr1:1334760-1336070 FORWARD LENGTH=220	Vesicle-associated membrane protein 3 OS=Mus musculus GN=Vamp3 PE=1 SV=1	26.7163	27.3536	26.8995	26.6523	26.7876	26.5628	26.7253	26.687	26.764	26.9453	26.8351	26.848	27.7287	27.2464	27.2565	27.3755	Cluster -1	3	24.4	24.761	0	26.375	2.69254	0.00264374
Pg_S2929.1	2-oxoglutarate (2OG) and Fe(II)-dependent oxygenase superfamily protein	AT3G12940.1	unknown	AT3G12940.1 | Symbols: | 2-oxoglutarate (2OG) and Fe(II)-dependent oxygenase superfamily protein | chr3:4130242-4131912 REVERSE LENGTH=474	unknown	23.3739	25.3352	23.8906	24.4211	23.4873	23.626	23.4401	23.6776	22.6411	23.4231	22.1726	25.8986	25.8844	25.9425	26.0517	25.9911	Cluster -1	2	15	35.575	0	6.9038	2.01681	0.0115957
Pg_S2971.18	phytochrome B	AT2G18790.1	Q2JWK9	AT2G18790.1 | Symbols: PHYB, HY3, OOP1 | phytochrome B | chr2:8140079-8144151 FORWARD LENGTH=1172	Adaptive-response sensory-kinase SasA OS=Synechococcus sp. (strain JA-3-3Ab) GN=sasA PE=3 SV=1	22.9052	25.3177	24.456	23.3903	23.5561	24.153	23.2646	23.4633	24.1744	24.2263	24.6483	24.9279	25.2337	25.4155	25.2319	25.4014	Cluster -1	5	6.3	126.5	0	19.184	1.99694	0.0120832
Pg_S4680.6	phototropin 1	AT3G45780.1	Q00078	AT3G45780.1 | Symbols: PHOT1, NPH1, JK224, RPT1 | phototropin 1 | chr3:16818557-16823960 FORWARD LENGTH=996	Protein kinase C-like OS=Aspergillus niger GN=pkcA PE=3 SV=1	23.9893	23.9334	23.9271	24.9748	22.7528	22.8209	23.3026	23.4429	22.5291	23.9771	23.5225	23.1392	23.5256	25.9644	25.7721	25.8851	Cluster -1	1	18.4	115.18	0	11.161	2.37731	0.00529857
Pg_S5806.2	vaculolar sorting receptor 3	AT2G14740.1	Q9FYH7	AT2G14740.1 | Symbols: ATVSR3, VSR3, VSR2;2, BP80-2;2 | vaculolar sorting receptor 3 | chr2:6308895-6312303 FORWARD LENGTH=628	Vacuolar-sorting receptor 6 OS=Arabidopsis thaliana GN=VSR6 PE=2 SV=3	24.1259	24.0918	23.9788	24.7045	23.2367	24.4098	23.2771	22.7839	23.1793	23.3167	24.0646	23.3085	23.7587	25.756	25.7209	25.8478	Cluster -1	3	5.1	69.772	0	7.9062	2.19489	0.00792277
Pg_S3550.9	Aldolase-type TIM barrel family protein	AT5G13420.1	Q255E4	AT5G13420.1 | Symbols: | Aldolase-type TIM barrel family protein | chr5:4302080-4304212 REVERSE LENGTH=438	Transaldolase OS=Chlamydophila felis (strain Fe/C-56) GN=tal PE=3 SV=1	24.4701	24.1417	23.6504	24.4206	23.3651	23.7531	24.0158	24.1595	24.0949	23.1368	23.579	24.3934	23.6259	25.8512	25.5449	25.5041	Cluster -1	2	39.7	33.293	0	11.848	1.42309	0.0423275
Pg_S3414.4	IQ-domain 32	AT1G19870.1	Q9FXI5	AT1G19870.1 | Symbols: iqd32 | IQ-domain 32 | chr1:6895400-6898539 REVERSE LENGTH=794	Protein IQ-DOMAIN 32 OS=Arabidopsis thaliana GN=IQD32 PE=1 SV=3	24.6712	24.3604	25.0295	24.3779	23.4884	22.1156	22.1598	22.5315	23.8188	23.981	24.8173	21.0838	26.1564	26.2747	26.2244	26.1478	Cluster -1	3	30.2	74.338	0	18.464	3.2927	0.000711536
Pg_S3077.11	RNA-binding (RRM/RBD/RNP motifs) family protein with retrovirus zinc finger-like domain	AT1G60650.1	Q99729	AT1G60650.1 | Symbols: | RNA-binding (RRM/RBD/RNP motifs) family protein with retrovirus zinc finger-like domain | chr1:22340089-22342148 FORWARD LENGTH=292	Heterogeneous nuclear ribonucleoprotein A/B OS=Homo sapiens GN=HNRNPAB PE=1 SV=2	24.8917	23.8532	24.2052	25.3079	24.7797	24.7004	23.1831	24.591	22.6866	24.1865	23.949	22.3882	25.7288	25.1374	25.0746	26.0104	Cluster -1	2	5.9	36.354	0	4.6187	2.10879	0.00951716
Pg_S0727.11	Calcium-dependent lipid-binding (CaLB domain) family protein	AT5G55530.1	unknown	AT5G55530.1 | Symbols: | Calcium-dependent lipid-binding (CaLB domain) family protein | chr5:22494439-22495656 FORWARD LENGTH=405	unknown	23.2281	23.853	24.8585	24.5251	23.9038	24.0095	23.6057	23.6454	24.6681	24.4169	24.7376	22.3908	25.5113	25.823	25.6079	25.7159	Cluster -1	2	21.9	17.171	0	16.599	2.09199	0.00983851
Pg_S0472.6	diacylglycerol kinase 7	AT4G30340.1	Q5KSL6	AT4G30340.1 | Symbols: ATDGK7, DGK7 | diacylglycerol kinase 7 | chr4:14838465-14840941 REVERSE LENGTH=492	Diacylglycerol kinase kappa OS=Homo sapiens GN=DGKK PE=1 SV=1	25.2743	25.023	25.1459	24.9023	24.8249	24.9834	25.0226	24.871	25.4567	25.3499	25.4248	21.9792	26.8763	25.9046	26.6351	26.6855	Cluster -1	3	7.1	144.73	0	17.533	1.39418	0.0451336
Pg_S3572.3	somatic embryogenesis receptor-like kinase 1	AT1G71830.1	Q9SCZ4	AT1G71830.1 | Symbols: SERK1, ATSERK1 | somatic embryogenesis receptor-like kinase 1 | chr1:27018575-27021842 FORWARD LENGTH=625	Receptor-like protein kinase FERONIA OS=Arabidopsis thaliana GN=FER PE=1 SV=1	23.5662	24.465	23.255	23.8862	23.9903	23.2731	22.8618	23.8759	23.3439	23.649	23.1512	22.2146	24.908	24.77	24.8852	24.544	Cluster -1	3	8.5	69.836	0	8.7217	2.59677	0.00326948
Pg_S4797.4	ATP-citrate lyase A-3	AT1G09430.1	O13907	AT1G09430.1 | Symbols: ACLA-3 | ATP-citrate lyase A-3 | chr1:3042135-3044978 FORWARD LENGTH=424	Probable ATP-citrate synthase subunit 2 OS=Schizosaccharomyces pombe (strain 972 / ATCC 24843) GN=SPAC22A12.16 PE=1 SV=1	24.1055	24.2219	23.9242	23.7833	23.0019	25.4309	23.371	25.4431	21.8206	23.678	22.9413	24.0344	26.2906	26.3946	26.319	25.9224	Cluster -1	3	29.8	29.962	0	30.037	2.85899	0.00183677
Pg_S2143.10	Transketolase family protein	AT5G50850.1	B1YLQ5	AT5G50850.1 | Symbols: MAB1 | Transketolase family protein | chr5:20689671-20692976 FORWARD LENGTH=363	1-deoxy-D-xylulose-5-phosphate synthase OS=Exiguobacterium sibiricum (strain DSM 17290 / JCM 13490 / 255-15) GN=dxs PE=3 SV=1	24.1312	24.6352	24.4767	23.722	22.5815	24.5327	24.1012	24.2972	22.3824	22.8248	23.7217	23.073	24.6034	24.7133	24.7759	25.2003	Cluster -1	2	24.3	45.489	0	6.2938	2.26103	0.00685943
Pg_S4149.7	cell elongation protein / DWARF1 / DIMINUTO (DIM)	AT3G19820.1	P9WJF0	AT3G19820.1 | Symbols: DWF1, DIM, EVE1, DIM1, CBB1 | cell elongation protein / DWARF1 / DIMINUTO (DIM) | chr3:6879835-6881616 REVERSE LENGTH=561	Probable decaprenylphosphoryl-beta-D-ribose oxidase OS=Mycobacterium tuberculosis (strain CDC 1551 / Oshkosh) GN=dprE1 PE=3 SV=1	23.9854	24.1507	23.4421	23.5857	23.4899	24.7038	22.7145	23.918	22.278	24.1695	24.1926	24.2646	25.5746	25.6471	25.6122	25.4909	Cluster -1	2	48.5	66.122	0	6.7617	2.42642	0.00477372
Pg_S6896.2	hydroxymethylglutaryl-CoA synthase / HMG-CoA synthase / 3-hydroxy-3-methylglutaryl coenzyme A synthase	AT4G11820.2	A9AAA1	AT4G11820.2 | Symbols: MVA1, FKP1 | hydroxymethylglutaryl-CoA synthase / HMG-CoA synthase / 3-hydroxy-3-methylglutaryl coenzyme A synthase | chr4:7109124-7111901 REVERSE LENGTH=461	UPF0219 protein MmarC6_1461 OS=Methanococcus maripaludis (strain C6 / ATCC BAA-1332) GN=MmarC6_1461 PE=3 SV=1	23.1073	23.4609	24.6614	22.9057	27.0187	26.6734	27.3146	26.6319	25.8195	22.3874	25.1484	22.8882	27.83	27.7376	27.6997	27.7627	Cluster -1	1	21.8	52.066	0	29.225	4.19053	0.000101593
Pg_S6881.4	endomembrane-type CA-ATPase 4	AT1G07670.1	P9WPS3	AT1G07670.1 | Symbols: ATECA4, ECA4 | endomembrane-type CA-ATPase 4 | chr1:2370305-2374196 REVERSE LENGTH=1061	Probable copper-exporting P-type ATPase V OS=Mycobacterium tuberculosis (strain ATCC 25618 / H37Rv) GN=ctpV PE=1 SV=1	25.5081	25.5649	25.5722	25.4252	25.9711	26.2333	26.3174	25.9327	25.4279	25.4477	25.4801	25.3225	26.613	26.5802	26.5447	26.6429	Cluster -1	3	12.8	111.66	0	32.221	8.07873	2.63272e-08
Pg_S5535.7	Adaptor protein complex AP-2, alpha subunit	AT5G22780.1	P63010	AT5G22780.1 | Symbols: | Adaptor protein complex AP-2, alpha subunit | chr5:7590100-7597828 REVERSE LENGTH=1013	AP-2 complex subunit beta OS=Homo sapiens GN=AP2B1 PE=1 SV=1	26.9274	26.8253	26.9079	27.0862	27.2926	27.2255	27.3189	27.2643	27.3919	26.6308	26.8284	26.8758	27.8812	27.9339	27.8904	27.8075	Cluster -1	17	25	113.48	0	73.657	4.81618	2.60552e-05
Pg_S5368.11	fatty acid amide hydrolase	AT5G64440.1	Q31F53	AT5G64440.1 | Symbols: AtFAAH, FAAH | fatty acid amide hydrolase | chr5:25766229-25770260 FORWARD LENGTH=607	Glutamyl-tRNA(Gln) amidotransferase subunit A OS=Thiomicrospira crunogena (strain XCL-2) GN=gatA PE=3 SV=1	24.4367	23.288	24.0397	23.8595	25.0492	24.9458	24.9971	25.1688	24.1914	22.5512	22.6395	22.9229	26.9293	26.8541	26.8459	26.6136	Cluster -1	1	16	62.568	0	27.211	6.33609	1.01659e-06
Pg_S5206.10	methyl-CPG-binding domain 9	AT3G01460.1	Q9SIW1	AT3G01460.1 | Symbols: MBD9, ATMBD9 | methyl-CPG-binding domain 9 | chr3:173316-182038 FORWARD LENGTH=2176	BEL1-like homeodomain protein 7 OS=Arabidopsis thaliana GN=BLH7 PE=2 SV=1	27.0003	27.1511	27.1483	27.3498	27.8164	27.7174	27.7309	27.5608	27.1134	26.9662	27.1523	27.2066	28.1705	28.0166	28.1215	28.2951	Cluster -1	1	1.9	102.71	0.0023502	3.2796	7.12958	1.91644e-07
Pg_S3967.1	3-ketoacyl-CoA synthase 19	AT5G04530.1	A0PXB6	AT5G04530.1 | Symbols: KCS19 | 3-ketoacyl-CoA synthase 19 | chr5:1292222-1293616 REVERSE LENGTH=464	3-oxoacyl-[acyl-carrier-protein] synthase 3 OS=Clostridium novyi (strain NT) GN=fabH PE=3 SV=1	22.2193	23.2711	24.2493	23.4281	26.0501	25.9995	26.5177	25.8028	23.898	23.0608	23.5631	24.2049	27.7141	27.5487	27.7331	27.6899	Cluster -1	10	31	53.052	0	33.42	7.0118	2.45117e-07
Pg_S2608.10	expansin A8	AT2G40610.1	Q2QP13	AT2G40610.1 | Symbols: ATEXPA8, EXP8, ATEXP8, ATHEXP ALPHA 1.11, EXPA8 | expansin A8 | chr2:16949121-16950472 REVERSE LENGTH=253	Expansin-A26 OS=Oryza sativa subsp. japonica GN=EXPA26 PE=2 SV=1	22.7949	24.1931	23.0849	24.0395	26.3933	26.2925	26.4971	25.965	24.0321	23.2696	22.8031	22.734	28.1755	28.1572	28.1437	28.128	Cluster -1	2	12.9	27.568	0	9.1913	8.01885	2.98931e-08
Pg_S2464.19	Phosphofructokinase family protein	AT1G12000.1	O51669	AT1G12000.1 | Symbols: | Phosphofructokinase family protein | chr1:4050159-4053727 REVERSE LENGTH=566	ATP-dependent 6-phosphofructokinase OS=Borrelia burgdorferi (strain ATCC 35210 / B31 / CIP 102532 / DSM 4680) GN=pfkA PE=3 SV=2	23.3208	23.4715	23.945	22.2665	25.7071	25.8142	25.7974	26.0175	26.0857	22.6501	22.9205	22.9635	27.0805	26.6839	27.0596	27.1393	Cluster -1	3	62.3	60.304	0	80.567	3.74361	0.00026714
Pg_S1231.2	eukaryotic translation initiation factor 4A1	AT3G13920.2	A5DWJ1	AT3G13920.2 | Symbols: EIF4A1, RH4, TIF4A1 | eukaryotic translation initiation factor 4A1 | chr3:4592586-4594128 REVERSE LENGTH=415	ATP-dependent RNA helicase FAL1 OS=Lodderomyces elongisporus (strain ATCC 11503 / CBS 2605 / JCM 1781 / NBRC 1676 / NRRL YB-4239) GN=FAL1 PE=3 SV=1	27.804	27.9775	27.896	27.8614	28.2688	28.2896	28.1383	28.0705	28.0418	27.8168	27.9482	27.9804	28.5025	28.5952	28.5765	28.5433	Cluster -1	1	59.6	46.477	0	24.169	6.54757	6.49936e-07
Pg_S1290.18	serine carboxypeptidase-like 29	AT4G30810.1	Q8S8P0	AT4G30810.1 | Symbols: scpl29 | serine carboxypeptidase-like 29 | chr4:15003474-15006017 FORWARD LENGTH=479	Putative serine carboxypeptidase-like 52 OS=Arabidopsis thaliana GN=SCPL52 PE=5 SV=1	23.6416	23.3763	25.926	23.7403	25.6203	25.629	25.5661	25.5756	25.0495	22.14	25.3319	25.5662	26.5528	26.7722	26.5855	26.2553	Cluster -1	2	19.6	55.795	0	25.731	1.64641	0.0259646
Pg_S8941.1	S-adenosylmethionine synthetase 2	AT4G01850.1	Q32C11	AT4G01850.1 | Symbols: SAM-2, MAT2, SAM2, AtSAM2 | S-adenosylmethionine synthetase 2 | chr4:796298-797479 REVERSE LENGTH=393	S-adenosylmethionine synthase OS=Shigella dysenteriae serotype 1 (strain Sd197) GN=metK PE=3 SV=1	25.6661	25.9051	25.471	25.7059	27.4405	27.7229	27.4565	27.543	27.1859	27.0059	27.2712	26.9136	30.4645	30.624	30.6489	30.5898	Cluster -1	2	59.8	43.16	0	202.75	13.4495	6.42563e-13
Pg_S6426.2	HOPM interactor 7	AT3G43300.1	Q9R1D7	AT3G43300.1 | Symbols: ATMIN7, BEN1 | HOPM interactor 7 | chr3:15234235-15245034 REVERSE LENGTH=1758	Golgi-specific brefeldin A-resistance guanine nucleotide exchange factor 1 OS=Cricetulus griseus GN=GBF1 PE=2 SV=1	26.8552	27.0732	26.7217	26.8601	27.1736	27.2501	27.161	27.3032	26.6439	26.7779	26.7821	26.8405	28.0709	28.0274	27.9986	27.9933	Cluster -1	2	20.4	197.97	0	167.11	9.10737	3.27077e-09
Pg_S6074.2	adenosine kinase 2	AT5G03300.1	Q9SA51	AT5G03300.1 | Symbols: ADK2 | adenosine kinase 2 | chr5:796573-798997 FORWARD LENGTH=345	LOB domain-containing protein 3 OS=Arabidopsis thaliana GN=LBD3 PE=2 SV=1	28.3103	28.4117	28.4832	28.4839	28.8052	28.7374	28.7717	28.8252	28.3546	28.3917	28.3116	28.4166	29.3318	29.4094	29.3297	29.3532	Cluster -1	3	59.9	40.013	0	98.018	10.6714	1.46483e-10
Pg_S5954.7	pectin methylesterase PCR fragment F	AT5G53370.1	P58601	AT5G53370.1 | Symbols: ATPMEPCRF, PMEPCRF | pectin methylesterase PCR fragment F | chr5:21649683-21651530 REVERSE LENGTH=587	Pectinesterase OS=Ralstonia solanacearum (strain GMI1000) GN=pme PE=3 SV=1	23.9867	23.8205	23.987	23.5626	25.0223	24.9661	25.3002	25.4511	25.9405	25.5022	25.9536	26.2989	31.1375	31.0627	31.0147	31.0646	Cluster -1	2	36.5	42.447	0	90.034	13.328	8.04668e-13
Pg_S5603.2	villin 2	AT2G41740.1	P19657	AT2G41740.1 | Symbols: VLN2, ATVLN2 | villin 2 | chr2:17410962-17416878 REVERSE LENGTH=976	Plasma membrane ATPase 2 OS=Saccharomyces cerevisiae (strain ATCC 204508 / S288c) GN=PMA2 PE=1 SV=3	29.2235	29.2253	29.2573	29.2271	29.5038	29.534	29.3871	29.5973	29.4705	29.3907	29.4813	29.5455	30.7176	30.7325	30.6984	30.7988	Cluster -1	5	45.5	104.16	0	240.4	12.2699	6.55857e-12
Pg_S5446.5	ARM repeat superfamily protein	AT2G45720.1	Q59MN0	AT2G45720.1 | Symbols: | ARM repeat superfamily protein | chr2:18834468-18836129 FORWARD LENGTH=553	Vacuolar protein 8 OS=Candida albicans (strain SC5314 / ATCC MYA-2876) GN=VAC8 PE=3 SV=3	24.1158	24.175	23.4747	23.7632	25.6547	24.3176	25.5682	24.8342	24.233	24.5066	24.2198	24.0988	27.1712	26.8472	26.9599	26.6769	Cluster -1	11	16.4	122.24	0	28.104	6.32606	1.03796e-06
Pg_S3532.10	Ribosomal protein L19e family protein	AT1G02780.1	O05639	AT1G02780.1 | Symbols: emb2386 | Ribosomal protein L19e family protein | chr1:608120-609391 REVERSE LENGTH=214	50S ribosomal protein L19e OS=Sulfolobus acidocaldarius (strain ATCC 33909 / DSM 639 / JCM 8929 / NBRC 15157 / NCIMB 11770) GN=rpl19e PE=3 SV=1	23.6366	23.6001	23.128	23.0295	24.2345	24.3318	24.3586	22.7597	23.9159	23.9678	23.925	23.7471	26.4298	26.6013	26.6085	26.436	Cluster -1	1	20.1	24.363	0	5.9626	6.07897	1.75099e-06
Pg_S3214.14	sucrose synthase 4	AT3G43190.1	A0JZ09	AT3G43190.1 | Symbols: SUS4, ATSUS4 | sucrose synthase 4 | chr3:15179204-15182577 REVERSE LENGTH=808	D-inositol 3-phosphate glycosyltransferase OS=Arthrobacter sp. (strain FB24) GN=mshA PE=3 SV=1	30.2454	30.3228	30.3384	30.2949	31.2809	31.2804	31.3235	31.2736	30.4795	30.5142	30.6091	30.5106	33.2378	33.1795	33.1927	33.2528	Cluster -1	5	35.3	141.37	0	323.31	17.7073	3.02135e-16
Pg_S3073.10	unknown	unknown	unknown	unknown	unknown	29.4543	29.4865	29.5299	29.5351	30.085	30.1321	30.1695	30.1411	29.6663	29.6486	29.5593	29.6711	31.2528	31.3467	31.2786	31.2736	Cluster -1	14	43.9	159.65	0	272.63	14.9643	3.87909e-14
Pg_S3044.9	unknown	unknown	unknown	unknown	unknown	23.5285	24.3558	23.5377	22.8427	24.7083	24.6786	24.6705	24.6991	23.5131	23.5462	22.9603	23.9923	27.0584	27.0108	27.0976	27.079	Cluster -1	1	16.3	12.175	0	10.918	7.42921	1.01239e-07
Pg_S2456.18	beta-6 tubulin	AT5G12250.1	Q53M52	AT5G12250.1 | Symbols: TUB6 | beta-6 tubulin | chr5:3961317-3962971 REVERSE LENGTH=449	Tubulin alpha-2 chain OS=Oryza sativa subsp. japonica GN=TUBA PE=2 SV=1	23.8386	24.279	23.6281	23.8364	24.619	24.3479	24.6378	24.6203	23.1223	23.542	24.2596	24.0857	29.0875	28.8338	28.5172	28.8824	Cluster -1	3	73.9	50.192	0	121.2	10.0328	5.23113e-10
Pg_S1369.2	Stress responsive A/B Barrel Domain	AT5G22580.1	Q9LUV2	AT5G22580.1 | Symbols: | Stress responsive A/B Barrel Domain | chr5:7502709-7503137 FORWARD LENGTH=111	Probable protein Pop3 OS=Arabidopsis thaliana GN=At3g17210 PE=1 SV=1	23.0228	22.8993	23.6334	25.5379	24.9064	24.8837	24.9065	25.1994	24.639	24.612	24.8146	24.8039	29.1911	29.1794	29.1298	29.2384	Cluster -1	3	57.1	11.812	0	28.199	6.79901	3.82808e-07
Pg_S0920.4	TCP-1/cpn60 chaperonin family protein	AT3G18190.1	Q6NF74	AT3G18190.1 | Symbols: | TCP-1/cpn60 chaperonin family protein | chr3:6232226-6233836 FORWARD LENGTH=536	60 kDa chaperonin 2 OS=Corynebacterium diphtheriae (strain ATCC 700971 / NCTC 13129 / Biotype gravis) GN=groL2 PE=3 SV=1	30.0592	30.0398	29.9998	29.9338	30.3047	30.263	30.2935	30.2913	30.1854	30.2473	30.1841	30.1263	30.6032	30.6496	30.6173	30.5923	Cluster -1	1	65.6	57.369	0	222.94	9.24202	2.51532e-09
Pg_S1116.10	beta-6 tubulin	AT5G12250.1	Q53M52	AT5G12250.1 | Symbols: TUB6 | beta-6 tubulin | chr5:3961317-3962971 REVERSE LENGTH=449	Tubulin alpha-2 chain OS=Oryza sativa subsp. japonica GN=TUBA PE=2 SV=1	27.99	28.0967	28.2042	27.9225	29.426	29.6585	29.5253	29.3943	28.3707	28.3839	28.3065	28.3382	32.173	32.2251	32.2059	32.2397	Cluster -1	10	78.5	50.355	0	252.29	15.4961	1.48946e-14
Pg_S2472.11	Adaptor protein complex AP-1, gamma subunit	AT1G60070.2	Q8I8U2	AT1G60070.2 | Symbols: | Adaptor protein complex AP-1, gamma subunit | chr1:22142944-22149296 REVERSE LENGTH=898	AP-1 complex subunit gamma OS=Dictyostelium discoideum GN=ap1g1 PE=1 SV=1	25.4516	25.398	25.0764	24.8449	26.3188	26.0416	26.0301	26.1653	25.9077	25.8317	25.1388	25.3436	27.6073	27.4576	27.4625	27.5417	Cluster -1	13	19	96.544	0	37.574	7.08875	2.08542e-07
Pg_S2120.9	alpha-galactosidase 2	AT5G08370.1	Q4WVZ3	AT5G08370.1 | Symbols: AtAGAL2, AGAL2 | alpha-galactosidase 2 | chr5:2691116-2693441 REVERSE LENGTH=396	Probable alpha-galactosidase A OS=Neosartorya fumigata (strain ATCC MYA-4609 / Af293 / CBS 101355 / FGSC A1100) GN=aglA PE=3 SV=1	27.2863	27.6416	27.4643	27.4199	28.1414	28.2111	27.9935	27.9937	27.3476	27.3043	27.5818	27.6518	29.1651	29.3072	29.3024	29.2837	Cluster -1	9	40.3	43.033	0	112.42	9.3931	1.84927e-09
Pg_S5058.15	RNA-binding (RRM/RBD/RNP motifs) family protein	AT4G14300.1	Q6GLB5	AT4G14300.1 | Symbols: | RNA-binding (RRM/RBD/RNP motifs) family protein | chr4:8231179-8232785 FORWARD LENGTH=411	ELAV-like protein 1 OS=Xenopus tropicalis GN=elavl1 PE=2 SV=1	23.4399	24.3397	23.968	23.526	25.3541	23.1943	24.8549	24.9663	24.5442	24.8891	24.8966	24.3819	26.8011	26.9376	26.8851	26.8875	Cluster -1	5	25	32.179	0	18.138	4.62373	3.96251e-05
Pg_S8353.1	beta-D-xylosidase 4	AT5G64570.1	Q5B681	AT5G64570.1 | Symbols: XYL4, ATBXL4 | beta-D-xylosidase 4 | chr5:25810227-25813309 REVERSE LENGTH=784	Probable beta-glucosidase N OS=Emericella nidulans (strain FGSC A4 / ATCC 38163 / CBS 112.46 / NRRL 194 / M139) GN=bglN PE=3 SV=1	27.8089	26.0283	27.7862	27.4252	27.6845	27.7769	27.6459	26.8999	26.397	26.3952	26.2602	26.5742	28.8803	28.7725	28.9549	28.9606	Cluster -1	2	24.7	83.966	0	135.33	4.12407	0.000117242
Pg_S5918.6	xyloglucan endotransglucosylase/hydrolase 7	AT4G37800.1	P32623	AT4G37800.1 | Symbols: XTH7 | xyloglucan endotransglucosylase/hydrolase 7 | chr4:17775703-17777372 REVERSE LENGTH=293	Probable glycosidase CRH2 OS=Saccharomyces cerevisiae (strain ATCC 204508 / S288c) GN=UTR2 PE=1 SV=3	25.0119	23.5916	23.241	23.2083	24.341	24.3067	24.1734	24.5311	23.7833	23.4378	22.4138	22.908	28.8196	28.8762	28.9911	28.7421	Cluster -1	1	71.3	22.599	0	16.35	7.95411	3.42546e-08
Pg_S5010.7	Protein of unknown function (DUF288)	AT2G41770.1	unknown	AT2G41770.1 | Symbols: | Protein of unknown function (DUF288) | chr2:17424549-17427042 REVERSE LENGTH=771	unknown	23.7173	22.8001	23.638	23.3312	23.722	23.7476	23.9226	23.413	24.181	23.5351	23.1505	22.9758	24.7997	24.5046	24.6267	25.0428	Cluster -1	5	8.3	86.938	0	11.724	3.10868	0.00106087
Pg_S4460.5	NAD(P)-binding Rossmann-fold superfamily protein	AT1G30620.1	Q31FG4	AT1G30620.1 | Symbols: HSR8, MUR4, UXE1 | NAD(P)-binding Rossmann-fold superfamily protein | chr1:10855496-10857970 FORWARD LENGTH=419	ADP-L-glycero-D-manno-heptose-6-epimerase OS=Thiomicrospira crunogena (strain XCL-2) GN=hldD PE=3 SV=1	24.9943	23.9215	24.6537	24.4774	26.0008	25.4025	25.0119	25.085	24.2575	24.4868	24.3024	24.5721	27.1219	27.0219	27.0875	27.1335	Cluster -1	5	18.8	41.433	0	23.163	6.67123	5.01609e-07
Pg_S3804.6	vacuolar ATP synthase subunit A	AT1G78900.1	P41009	AT1G78900.1 | Symbols: VHA-A | vacuolar ATP synthase subunit A | chr1:29660463-29664575 FORWARD LENGTH=623	ATP synthase subunit beta OS=Bacillus caldotenax GN=atpD PE=3 SV=1	27.0107	27.0227	26.8272	27.0169	26.8843	27.2376	27.113	26.9412	26.7469	26.7023	26.804	26.7078	27.7984	27.9579	27.7389	27.6882	Cluster -1	7	75.6	68.829	0	23.705	6.98938	2.56322e-07
Pg_S3774.1	Protein of unknown function, DUF642	AT5G11420.1	unknown	AT5G11420.1 | Symbols: | Protein of unknown function, DUF642 | chr5:3644655-3646991 FORWARD LENGTH=366	unknown	23.2347	23.8819	24.4662	24.3682	22.8407	26.512	26.5104	23.302	23.6474	22.7669	23.4279	24.0164	28.5269	28.7355	28.5578	28.574	Cluster -1	1	43	40.82	0	22.476	4.10991	0.000120868
Pg_S3064.27	Tubulin/FtsZ family protein	AT4G14960.2	P28551	AT4G14960.2 | Symbols: TUA6 | Tubulin/FtsZ family protein | chr4:8548769-8550319 REVERSE LENGTH=450	Tubulin beta chain (Fragment) OS=Glycine max GN=TUBB PE=1 SV=2	32.1449	32.213	32.0843	32.2336	32.9683	32.9618	32.9631	32.9165	31.7171	31.6821	31.6909	31.6385	34.4426	34.4972	34.4438	34.4782	Cluster -1	1	78.7	49.482	0	323.31	17.1031	8.45267e-16
Pg_S4429.8	TPX2 (targeting protein for Xklp2) protein family	AT4G32330.1	Q8GYX9	AT4G32330.1 | Symbols: | TPX2 (targeting protein for Xklp2) protein family | chr4:15609801-15611867 FORWARD LENGTH=437	Protein WVD2-like 1 OS=Arabidopsis thaliana GN=WDL1 PE=1 SV=1	23.6668	22.5928	24.3412	24.3184	23.8478	24.2702	23.0903	24.0712	22.3097	22.86	22.0515	23.5214	26.1854	26.4683	26.2067	26.4726	Cluster -1	2	7.9	51.883	0	76.189	4.94769	1.9713e-05
Pg_S2692.8	pleiotropic drug resistance 12	AT1G15520.1	P08183	AT1G15520.1 | Symbols: PDR12, ATPDR12, ABCG40, ATABCG40 | pleiotropic drug resistance 12 | chr1:5331993-5338175 REVERSE LENGTH=1423	Multidrug resistance protein 1 OS=Homo sapiens GN=ABCB1 PE=1 SV=3	24.1349	23.3232	24.1534	23.4653	23.6604	23.7986	23.7508	23.3863	22.9989	22.2293	23.4055	23.0224	25.5579	25.2703	25.3641	25.3761	Cluster -1	1	24.7	183.97	0	15.084	5.5656	5.23875e-06
Pg_S2377.3	H(+)-ATPase 5	AT2G24520.1	P15718	AT2G24520.1 | Symbols: AHA5, HA5 | H(+)-ATPase 5 | chr2:10415522-10419730 FORWARD LENGTH=931	Putative Pol polyprotein from transposon element Bs1 OS=Zea mays PE=3 SV=1	29.1839	29.1194	29.2074	29.4753	29.2286	29.3205	29.4829	29.3594	29.1806	29.1668	29.0685	29.1762	30.2243	30.2027	30.1511	30.2201	Cluster -1	8	29.4	184.23	0	187.7	7.87394	4.05092e-08
Pg_S2330.3	NSP (nuclear shuttle protein)-interacting GTPase	AT4G13350.1	unknown	AT4G13350.1 | Symbols: NIG | NSP (nuclear shuttle protein)-interacting GTPase | chr4:7770170-7773321 REVERSE LENGTH=602	unknown	22.9997	23.7321	24.7524	23.5882	24.8929	22.044	25.0408	23.9045	24.2873	23.0577	23.4004	24.7344	25.9396	26.2982	26.1223	26.0595	Cluster -1	3	5.9	78.554	0	7.6959	2.15077	0.00870278
Pg_S2245.39	O-methyltransferase family protein	AT4G35160.1	Q0IP69	AT4G35160.1 | Symbols: | O-methyltransferase family protein | chr4:16730989-16732808 REVERSE LENGTH=382	Naringenin 7-O-methyltransferase OS=Oryza sativa subsp. japonica GN=Os12g0240900 PE=1 SV=2	25.0072	24.8107	24.7602	24.8147	24.9005	25.4979	25.3192	25.96	23.4108	24.0497	22.7582	23.6118	29.3949	29.4082	29.5515	29.4384	Cluster -1	6	52.4	39.39	0	102.64	9.93692	6.23809e-10
Pg_S2116.14	Phosphoglycerate mutase family protein	AT3G26780.1	unknown	AT3G26780.1 | Symbols: | Phosphoglycerate mutase family protein | chr3:9848747-9850277 FORWARD LENGTH=399	unknown	23.3498	23.6865	25.4615	23.8692	26.0285	26.1216	26.3363	27.1297	22.964	23.3897	23.7639	23.6511	31.4576	31.4262	31.3629	31.4196	Cluster -1	10	50.7	29.872	0	148.12	9.31109	2.18526e-09
Pg_S1744.17	Coatomer, beta subunit	AT4G31480.1	Q9U4N3	AT4G31480.1 | Symbols: | Coatomer, beta subunit | chr4:15264145-15267384 FORWARD LENGTH=948	Coatomer subunit beta OS=Toxoplasma gondii PE=2 SV=2	27.6549	27.5691	27.9211	27.5342	27.7757	27.9351	27.8515	27.5027	27.275	27.2654	27.288	27.2551	28.7488	28.7175	28.7337	28.6736	Cluster -1	2	40.6	105.98	0	69.696	7.76366	5.08353e-08
Pg_S1444.28	IQ-domain 32	AT1G19870.1	Q9FXI5	AT1G19870.1 | Symbols: iqd32 | IQ-domain 32 | chr1:6895400-6898539 REVERSE LENGTH=794	Protein IQ-DOMAIN 32 OS=Arabidopsis thaliana GN=IQD32 PE=1 SV=3	24.4317	23.4422	25.3046	24.9677	25.4358	24.8144	26.3167	25.4868	25.0669	25.3552	24.0505	25.0996	28.6878	28.2805	28.7503	28.2916	Cluster -1	5	30.4	85.819	0	82.26	5.57378	5.15134e-06
Pg_S4448.7	O-fucosyltransferase family protein	AT5G65470.1	Q8W486	AT5G65470.1 | Symbols: | O-fucosyltransferase family protein | chr5:26172432-26174904 FORWARD LENGTH=504	Uncharacterized protein At1g04910 OS=Arabidopsis thaliana GN=At1g04910 PE=2 SV=1	23.7039	23.1466	24.9025	23.7392	24.5049	24.6119	24.6756	24.4027	23.9404	23.9442	24.1721	24.0471	26.4111	26.502	26.5035	26.3942	Cluster -1	4	10.4	47.543	0	24.002	5.75581	3.49962e-06
Pg_S0199.6	GDSL-like Lipase/Acylhydrolase superfamily protein	AT1G29660.1	P10978	AT1G29660.1 | Symbols: | GDSL-like Lipase/Acylhydrolase superfamily protein | chr1:10371955-10373624 FORWARD LENGTH=364	Retrovirus-related Pol polyprotein from transposon TNT 1-94 OS=Nicotiana tabacum PE=2 SV=1	23.9426	24.2272	24.1767	24.6594	24.1806	24.5307	24.426	24.3716	23.7041	23.1219	24.1065	24.0891	25.5254	25.6125	25.6997	26.0855	Cluster -1	1	22	41.702	0	14.307	5.10992	1.38695e-05
Pg_S0439.55	ATP binding cassette subfamily B19	AT3G28860.1	Q8DAV2	AT3G28860.1 | Symbols: ATMDR1, ATMDR11, PGP19, MDR11, MDR1, ATPGP19, ABCB19, ATABCB19 | ATP binding cassette subfamily B19 | chr3:10870287-10877286 REVERSE LENGTH=1252	Lipid A export ATP-binding/permease protein MsbA OS=Vibrio vulnificus (strain CMCP6) GN=msbA PE=3 SV=1	23.0952	23.7344	24.5856	24.5247	24.2562	24.9784	24.9265	23.5601	22.4987	22.8051	24.6178	21.8298	28.9302	28.9744	28.9013	28.9952	Cluster -1	2	24.1	136.11	0	82.243	6.21654	1.30108e-06
Pg_S4303.3	tubulin beta chain 3	AT5G62700.1	Q25563	AT5G62700.1 | Symbols: TUB3 | tubulin beta chain 3 | chr5:25184501-25186426 FORWARD LENGTH=450	Tubulin alpha-13 chain OS=Naegleria gruberi GN=TUBA13 PE=2 SV=1	23.7135	24.7932	23.9284	24.9855	25.9407	25.6708	25.7075	23.7563	22.3059	23.6225	24.3542	22.259	27.9726	27.8925	27.8321	27.7839	Cluster -1	1	78.3	50.416	0	36.217	4.8016	2.68813e-05
Pg_S4227.7	potassium channel beta subunit 1	AT1G04690.1	P14065	AT1G04690.1 | Symbols: KAB1, KV-BETA1 | potassium channel beta subunit 1 | chr1:1313662-1315420 FORWARD LENGTH=328	Glycerol 2-dehydrogenase (NADP(+)) OS=Saccharomyces cerevisiae (strain ATCC 204508 / S288c) GN=GCY1 PE=1 SV=1	24.2365	24.8903	25.0163	24.8812	25.1985	24.9747	24.8441	25.0046	24.1399	24.1867	24.0682	22.8609	26.848	26.7351	26.9058	26.7992	Cluster -1	5	18.6	36.56	0	20.475	6.10302	1.66149e-06
Pg_S2757.6	cellulose synthase 1	AT4G32410.1	Q7XUU0	AT4G32410.1 | Symbols: CESA1, RSW1, AtCESA1 | cellulose synthase 1 | chr4:15641009-15646388 REVERSE LENGTH=1081	Putative cellulose synthase-like protein H3 OS=Oryza sativa subsp. japonica GN=CSLH3 PE=3 SV=3	23.1418	24.8861	23.8283	22.2331	24.6009	24.8395	24.9248	25.0965	23.9872	23.2045	23.514	22.6177	25.5494	26.0284	25.8588	25.7997	Cluster -1	5	5.5	122.25	0	22.789	3.37879	0.000591292
Pg_S2517.8	unknown	unknown	unknown	unknown	unknown	23.8063	25.717	24.2616	23.7228	24.7023	24.9601	24.7105	24.8642	23.8325	23.2551	24.3257	23.1899	26.6351	26.7841	26.6075	26.4278	Cluster -1	1	14.8	13.362	0	56.109	4.40394	6.37469e-05
Pg_S2282.8	HXXXD-type acyl-transferase family protein	AT1G03495.1	Q9ZTK5	AT1G03495.1 | Symbols: | HXXXD-type acyl-transferase family protein | chr1:873436-874832 FORWARD LENGTH=465	Deacetylvindoline O-acetyltransferase OS=Catharanthus roseus GN=DAT PE=1 SV=1	23.6696	24.6212	24.0238	23.2148	25.3427	25.1795	25.3254	25.1495	22.4298	24.1574	24.0497	22.0756	26.9381	27.0565	26.8152	26.5885	Cluster -1	2	15.3	33.075	0	13.824	4.87789	2.28192e-05
Pg_S1501.44	NAD(P)-binding Rossmann-fold superfamily protein	AT1G30620.1	Q31FG4	AT1G30620.1 | Symbols: HSR8, MUR4, UXE1 | NAD(P)-binding Rossmann-fold superfamily protein | chr1:10855496-10857970 FORWARD LENGTH=419	ADP-L-glycero-D-manno-heptose-6-epimerase OS=Thiomicrospira crunogena (strain XCL-2) GN=hldD PE=3 SV=1	24.4859	25.2429	25.3407	25.2066	25.2068	24.984	25.0559	24.9907	24.3458	24.7408	24.6358	24.2516	26.1013	26.0952	25.9967	25.9822	Cluster -1	4	23.1	35.453	0	14.125	5.11342	1.37753e-05
Pg_S0509.4	binding	AT4G15890.1	P42695	AT4G15890.1 | Symbols: | binding | chr4:9017453-9022745 FORWARD LENGTH=1314	Condensin-2 complex subunit D3 OS=Homo sapiens GN=NCAPD3 PE=1 SV=2	23.1998	24.2035	25.0617	23.393	24.9035	25.3214	24.8715	24.2541	23.4747	23.2117	22.8941	21.7614	27.5667	27.4152	27.6256	27.6108	Cluster -1	10	13.4	225.67	0	67.362	5.98627	2.13661e-06
Pg_S1419.5	Endomembrane protein 70 protein family	AT2G01970.1	P40071	AT2G01970.1 | Symbols: | Endomembrane protein 70 protein family | chr2:452197-454819 REVERSE LENGTH=592	Transmembrane 9 superfamily member 3 OS=Saccharomyces cerevisiae (strain ATCC 204508 / S288c) GN=TMN3 PE=1 SV=1	22.7459	24.3795	23.3937	23.7156	25.0919	25.1241	24.0799	23.0325	22.4279	24.1718	23.9384	22.5525	25.7351	25.6261	25.4616	26.11	Cluster -1	2	5.5	87.021	0	12.13	2.52044	0.00387007
Pg_S8437.3	methionine synthase 2	AT3G03780.1	A8YZI1	AT3G03780.1 | Symbols: ATMS2, MS2 | methionine synthase 2 | chr3:957602-960740 FORWARD LENGTH=765	5-methyltetrahydropteroyltriglutamate--homocysteine methyltransferase OS=Staphylococcus aureus (strain USA300 / TCH1516) GN=metE PE=3 SV=1	28.2537	28.4402	28.4459	28.1395	28.4693	28.5461	28.5598	28.2761	27.9193	27.8062	27.9861	27.9989	28.8291	28.8466	28.8796	28.8446	Cluster -1	4	62.7	84.736	0	83.58	6.26396	1.17871e-06
Pg_S7836.3	ADP-glucose pyrophosphorylase family protein	AT1G74910.1	Q9Y725	AT1G74910.1 | Symbols: | ADP-glucose pyrophosphorylase family protein | chr1:28135770-28138456 REVERSE LENGTH=415	Mannose-1-phosphate guanyltransferase 1 OS=Candida glabrata (strain ATCC 2001 / CBS 138 / JCM 3761 / NBRC 0622 / NRRL Y-65) GN=MPG1 PE=1 SV=1	24.3556	24.0022	23.525	22.9815	23.7627	22.7631	25.1431	24.0802	22.9579	22.8187	22.2854	21.7138	25.6093	25.5921	25.6772	25.6658	Cluster -1	3	27.4	45.965	0	8.8044	3.86805	0.000204671
Pg_S6958.5	tubulin beta 8	AT5G23860.1	P33623	AT5G23860.1 | Symbols: TUB8 | tubulin beta 8 | chr5:8042962-8044528 FORWARD LENGTH=449	Tubulin alpha-1 chain OS=Anemia phyllitidis GN=TUBA1 PE=2 SV=1	32.6071	32.5904	32.6014	32.6477	33.3472	33.2602	33.266	33.2248	31.979	31.9698	31.9337	31.9771	34.4745	34.4344	34.4743	34.4878	Cluster -1	2	78.5	50.297	0	323.31	17.7025	3.02135e-16
Pg_S5704.3	Coatomer, alpha subunit	AT1G62020.1	Q8TAF3	AT1G62020.1 | Symbols: | Coatomer, alpha subunit | chr1:22919814-22923728 FORWARD LENGTH=1216	WD repeat-containing protein 48 OS=Homo sapiens GN=WDR48 PE=1 SV=1	29.579	29.6338	29.5982	29.4841	29.5808	29.5687	29.6044	29.6104	28.9073	28.7894	28.8124	28.7547	30.2194	30.2661	30.163	30.1878	Cluster -1	6	47.2	137.14	0	224.62	12.0585	9.72887e-12
Pg_S4454.1	Leucine-rich repeat (LRR) family protein	AT1G33590.1	Q3V1N1	AT1G33590.1 | Symbols: | Leucine-rich repeat (LRR) family protein | chr1:12177788-12179221 FORWARD LENGTH=477	Malignant fibrous histiocytoma-amplified sequence 1 homolog OS=Mus musculus GN=Mfhas1 PE=2 SV=2	26.0822	26.1795	27.1685	23.5782	27.6402	27.8005	27.7163	27.6373	22.4472	22.3164	22.853	22.874	29.1132	29.4792	29.2461	29.4204	Cluster -1	13	41.1	43.19	0	113.75	6.51402	6.98808e-07
Pg_S4427.17	Chaperone protein htpG family protein	AT4G24190.1	B0UN89	AT4G24190.1 | Symbols: SHD, HSP90.7, AtHsp90.7, AtHsp90-7 | Chaperone protein htpG family protein | chr4:12551902-12555851 REVERSE LENGTH=823	Chaperone protein HtpG OS=Methylobacterium sp. (strain 4-46) GN=htpG PE=3 SV=1	25.7613	25.9669	25.909	25.8767	25.9972	26.3997	26.1456	26.2499	25.4086	25.3342	25.185	25.1889	26.5087	26.2181	26.6946	26.6794	Cluster -1	3	46	92.84	0	40.654	6.14141	1.53094e-06
Pg_S4363.6	ATP-citrate lyase A-3	AT1G09430.1	O13907	AT1G09430.1 | Symbols: ACLA-3 | ATP-citrate lyase A-3 | chr1:3042135-3044978 FORWARD LENGTH=424	Probable ATP-citrate synthase subunit 2 OS=Schizosaccharomyces pombe (strain 972 / ATCC 24843) GN=SPAC22A12.16 PE=1 SV=1	29.3711	29.3699	29.3549	29.2229	29.4081	29.2506	29.2989	29.3468	28.7451	28.744	28.8464	28.7224	30.2653	30.2921	30.3077	30.2699	Cluster -1	11	57.2	46.647	0	161.05	12.0533	9.79114e-12
Pg_S7281.2	beta-ketoacyl reductase 1	AT1G67730.1	F1SWA0	AT1G67730.1 | Symbols: YBR159, KCR1, ATKCR1 | beta-ketoacyl reductase 1 | chr1:25391676-25393365 FORWARD LENGTH=318	Zerumbone synthase OS=Zingiber zerumbet GN=ZSD1 PE=1 SV=1	27.0901	27.1319	26.5662	26.7491	27.2153	27.3569	27.2394	27.1277	26.6186	26.6389	26.5319	26.5179	27.6062	27.6384	27.5513	27.8075	Cluster -1	9	46.9	35.709	0	78.584	5.45138	6.71634e-06
Pg_S3394.17	ATP citrate lyase subunit B 2	AT5G49460.1	Q94522	AT5G49460.1 | Symbols: ACLB-2 | ATP citrate lyase subunit B 2 | chr5:20055048-20058195 FORWARD LENGTH=608	Succinyl-CoA ligase [ADP/GDP-forming] subunit alpha, mitochondrial OS=Drosophila melanogaster GN=Scsalpha PE=2 SV=3	30.6153	30.7116	30.6048	30.6204	31.0664	31.0625	30.9941	31.026	30.025	30.0527	30.0656	30.1301	31.7679	31.8128	31.7976	31.7773	Cluster -1	4	58.1	65.937	0	307.09	14.7928	5.3289e-14
Pg_S3264.10	Adaptin family protein	AT1G31730.1	Q80V94	AT1G31730.1 | Symbols: | Adaptin family protein | chr1:11359907-11363916 FORWARD LENGTH=938	AP-4 complex subunit epsilon-1 OS=Mus musculus GN=Ap4e1 PE=2 SV=3	26.8455	26.8624	26.9728	26.7542	26.7919	26.6938	26.898	26.9313	26.2238	26.3176	26.1657	26.1804	27.2914	27.2932	27.3722	27.2129	Cluster -1	10	16.2	105.17	0	37.377	8.23123	1.92443e-08
Pg_S3222.8	unknown	unknown	unknown	unknown	unknown	24.0808	24.1909	24.7984	23.2655	25.0008	25.0831	25.3681	25.0674	21.4938	23.3842	23.1287	23.281	26.5116	26.2544	26.4954	26.3404	Cluster -1	4	7.4	64.934	0	12.995	5.13483	1.31453e-05
Pg_S3092.13	Cupredoxin superfamily protein	AT1G23010.1	B0UVZ0	AT1G23010.1 | Symbols: LPR1 | Cupredoxin superfamily protein | chr1:8147353-8149580 FORWARD LENGTH=581	Cell division protein FtsP OS=Histophilus somni (strain 2336) GN=ftsP PE=3 SV=1	23.961	24.6171	23.534	24.8237	25.1143	24.928	25.1848	25.0503	22.6687	22.7789	23.7062	23.6069	26.9093	26.988	26.92	26.9371	Cluster -1	4	16.5	59.509	0	25.37	6.80891	3.75227e-07
Pg_S1957.32	ATP-dependent caseinolytic (Clp) protease/crotonase family protein	AT3G24360.1	Q28FR6	AT3G24360.1 | Symbols: | ATP-dependent caseinolytic (Clp) protease/crotonase family protein | chr3:8839832-8842799 REVERSE LENGTH=418	3-hydroxyisobutyryl-CoA hydrolase, mitochondrial OS=Xenopus tropicalis GN=hibch PE=2 SV=1	24.8857	23.596	24.7093	24.194	25.6041	25.5463	25.4406	25.2114	23.5791	22.3688	23.3621	22.8998	26.6384	26.5268	26.5978	26.5858	Cluster -1	4	13.7	50.727	0	16.946	6.5917	5.942e-07
Pg_S1583.46	cell elongation protein / DWARF1 / DIMINUTO (DIM)	AT3G19820.1	P9WJF0	AT3G19820.1 | Symbols: DWF1, DIM, EVE1, DIM1, CBB1 | cell elongation protein / DWARF1 / DIMINUTO (DIM) | chr3:6879835-6881616 REVERSE LENGTH=561	Probable decaprenylphosphoryl-beta-D-ribose oxidase OS=Mycobacterium tuberculosis (strain CDC 1551 / Oshkosh) GN=dprE1 PE=3 SV=1	28.1923	28.3883	28.1056	28.2062	28.5771	28.7308	28.7019	28.5979	27.9572	27.9082	28.0495	28.0404	29.2521	29.246	29.3314	29.3185	Cluster -1	2	48.5	66.256	0	114.86	9.73926	9.36983e-10
Pg_S1514.21	Phosphofructokinase family protein	AT1G12000.1	O51669	AT1G12000.1 | Symbols: | Phosphofructokinase family protein | chr1:4050159-4053727 REVERSE LENGTH=566	ATP-dependent 6-phosphofructokinase OS=Borrelia burgdorferi (strain ATCC 35210 / B31 / CIP 102532 / DSM 4680) GN=pfkA PE=3 SV=2	24.5968	23.0712	23.3906	24.0393	23.7385	25.1131	23.4076	24.8143	22.4926	22.7183	23.3328	22.6413	25.3066	25.7966	25.5482	25.5706	Cluster -1	2	48.7	44.837	0	14.512	3.76753	0.000254123
Pg_S1418.18	Adaptin family protein	AT1G31730.1	Q80V94	AT1G31730.1 | Symbols: | Adaptin family protein | chr1:11359907-11363916 FORWARD LENGTH=938	AP-4 complex subunit epsilon-1 OS=Mus musculus GN=Ap4e1 PE=2 SV=3	28.3438	28.292	28.0735	28.3273	28.0719	28.198	28.1015	27.9678	27.6404	27.4296	27.4884	27.3981	28.7936	28.7841	28.7535	28.7343	Cluster -1	4	26.3	124.96	0	95.373	8.48226	1.15693e-08
Pg_S2790.6	Ribosomal protein S8e family protein	AT5G59240.1	P25204	AT5G59240.1 | Symbols: | Ribosomal protein S8e family protein | chr5:23902626-23903670 REVERSE LENGTH=210	40S ribosomal protein S8 OS=Leishmania major GN=RPS8A PE=3 SV=1	30.1101	30.1428	30.1359	30.3225	30.4131	30.5358	30.4727	30.5204	29.9101	29.8453	29.8955	29.7275	30.7576	30.837	30.7389	30.8083	Cluster -1	1	22.7	39.137	0	103.46	8.52528	1.06662e-08
Pg_S1242.6	UDP-glucose 6-dehydrogenase family protein	AT5G15490.1	P39861	AT5G15490.1 | Symbols: | UDP-glucose 6-dehydrogenase family protein | chr5:5027872-5029314 REVERSE LENGTH=480	Protein CapL OS=Staphylococcus aureus GN=capL PE=3 SV=1	30.5729	30.6674	30.5853	30.6664	30.7853	30.7964	30.7753	30.7771	29.775	29.7987	29.6075	29.8264	31.7688	31.8186	31.8147	31.832	Cluster -1	1	64.6	52.983	0	258.85	13.556	5.36358e-13
Pg_S1237.20	Cytochrome P450 superfamily protein	AT5G07990.1	O42430	AT5G07990.1 | Symbols: TT7, CYP75B1, D501 | Cytochrome P450 superfamily protein | chr5:2560437-2562859 FORWARD LENGTH=513	Cytochrome P450 1A1 OS=Limanda limanda GN=cyp1a1 PE=2 SV=1	25.0945	23.7465	24.5663	24.3659	25.8372	25.9854	25.5877	26.0624	22.706	22.562	23.0436	23.7506	28.1731	28.2691	28.2025	28.1221	Cluster -1	12	35.3	57.324	0	40.406	8.52942	1.05844e-08
Pg_S2097.18	tubulin beta 8	AT5G23860.1	P33623	AT5G23860.1 | Symbols: TUB8 | tubulin beta 8 | chr5:8042962-8044528 FORWARD LENGTH=449	Tubulin alpha-1 chain OS=Anemia phyllitidis GN=TUBA1 PE=2 SV=1	28.7212	28.6782	28.7514	28.6438	29.5404	29.6404	29.618	29.6308	27.7418	27.7041	27.816	27.6954	30.3547	30.3469	30.3625	30.3557	Cluster -1	2	75.9	50.392	0	96.889	16.5859	2.08592e-15
Pg_S2245.26	plasma membrane intrinsic protein 2;8	AT2G16850.1	Q06611	AT2G16850.1 | Symbols: PIP3B, PIP2;8 | plasma membrane intrinsic protein 2;8 | chr2:7301647-7303180 FORWARD LENGTH=278	Aquaporin PIP1-2 OS=Arabidopsis thaliana GN=PIP1-2 PE=1 SV=1	29.2305	29.6419	29.5696	29.694	29.8215	29.9581	29.8159	29.8227	28.0988	28.0059	27.8722	28.1481	30.2356	30.1943	30.3672	30.3468	Cluster -1	2	37.6	29.68	0	84.728	10.0142	5.42728e-10
Pg_S0857.48	phototropin 1	AT3G45780.1	Q00078	AT3G45780.1 | Symbols: PHOT1, NPH1, JK224, RPT1 | phototropin 1 | chr3:16818557-16823960 FORWARD LENGTH=996	Protein kinase C-like OS=Aspergillus niger GN=pkcA PE=3 SV=1	23.4527	23.9676	23.2719	23.9257	25.6552	25.9245	25.807	25.6992	21.3187	23.057	22.0639	21.5058	28.5922	28.6486	28.6481	28.6269	Cluster -1	6	28.3	98.411	0	82.954	9.46554	1.60054e-09
Pg_S0544.7	dynamin-like 3	AT1G59610.1	Q9SE83	AT1G59610.1 | Symbols: ADL3, CF1, DRP2B, DL3 | dynamin-like 3 | chr1:21893413-21900780 FORWARD LENGTH=920	Dynamin-2A OS=Arabidopsis thaliana GN=DRP2A PE=1 SV=2	26.9146	26.6943	26.5044	26.5889	26.6213	26.5726	26.4342	26.4519	25.8733	25.9425	25.3745	25.729	27.1742	27.1139	27.3223	27.1683	Cluster -1	1	14	100.07	0	41.508	6.45308	7.95305e-07
Pg_S2935.1	Chitinase family protein	AT1G05850.1	P15326	AT1G05850.1 | Symbols: POM1, ERH2, ELP1, CTL1, ELP, HOT2, ATCTL1 | Chitinase family protein | chr1:1766833-1768117 REVERSE LENGTH=321	Alpha-amylase inhibitor/endochitinase (Fragments) OS=Coix lacryma-jobi PE=1 SV=1	24.9279	24.14	23.982	23.7575	25.8071	25.3134	23.4825	25.3682	22.8671	22.6634	22.9432	24.1982	26.572	26.3831	26.2736	26.2604	Cluster -1	2	20.9	34.696	0	16.942	3.76472	0.000255644
Pg_S0403.10	pleiotropic drug resistance 12	AT1G15520.1	P08183	AT1G15520.1 | Symbols: PDR12, ATPDR12, ABCG40, ATABCG40 | pleiotropic drug resistance 12 | chr1:5331993-5338175 REVERSE LENGTH=1423	Multidrug resistance protein 1 OS=Homo sapiens GN=ABCB1 PE=1 SV=3	28.6618	28.5851	28.5311	28.4967	28.5957	28.5844	28.479	28.5317	28.0479	28	28.0101	28.049	29.2169	29.2211	29.2496	29.2111	Cluster -1	4	28	184.71	0	164.98	11.7382	1.7685e-11
Pg_S3873.1	C2H2 zinc-finger protein SERRATE (SE)	AT2G27100.1	Q9ZVD0	AT2G27100.1 | Symbols: SE | C2H2 zinc-finger protein SERRATE (SE) | chr2:11572587-11576357 FORWARD LENGTH=720	Serrate RNA effector molecule OS=Arabidopsis thaliana GN=SE PE=1 SV=2	25.048	24.8725	24.3864	24.916	24.9267	24.8536	24.8904	24.7946	23.4973	23.9104	23.1504	24.6902	25.4304	25.5637	25.3552	25.521	Cluster -1	5	10.8	83.558	0	18.671	3.50765	0.000446462
Pg_S0102.70	Calcium-dependent lipid-binding (CaLB domain) family protein	AT5G55530.1	unknown	AT5G55530.1 | Symbols: | Calcium-dependent lipid-binding (CaLB domain) family protein | chr5:22494439-22495656 FORWARD LENGTH=405	unknown	27.5653	27.6203	27.2369	27.7593	27.8163	28.0527	27.8688	27.7784	26.9779	27.0318	27.1157	27.1222	28.4811	28.6639	28.4845	28.6913	Cluster -1	2	32.1	54.118	0	58.421	7.47465	9.26723e-08
Pg_S0234.13	tubulin beta-1 chain	AT1G75780.1	P14640	AT1G75780.1 | Symbols: TUB1 | tubulin beta-1 chain | chr1:28451378-28453602 REVERSE LENGTH=447	Tubulin alpha-1 chain OS=Zea mays GN=TUBA1 PE=3 SV=1	29.1719	29.2966	29.2561	29.1424	29.3741	29.2071	29.3631	29.4117	27.4581	27.2095	27.696	27.3126	29.9975	29.8551	30.0268	29.8507	Cluster -1	4	77	50.146	0	162.45	10.6741	1.45945e-10
Pg_S4885.2	nucleotide-rhamnose synthase/epimerase-reductase	AT1G63000.1	Q5UPS5	AT1G63000.1 | Symbols: NRS/ER, UER1 | nucleotide-rhamnose synthase/epimerase-reductase | chr1:23342510-23343859 FORWARD LENGTH=301	Uncharacterized protein L780 OS=Acanthamoeba polyphaga mimivirus GN=MIMI_L780 PE=4 SV=1	27.4393	26.9207	26.9767	25.3854	27.0719	27.1632	27.2226	26.9696	26.3209	26.1973	26.0505	26.1704	28.2894	28.3264	28.2907	28.3679	Cluster -1	4	42.2	33.661	0	59.007	3.78349	0.000245463
Pg_S4042.1	Laccase/Diphenol oxidase family protein	AT2G38080.1	Q04399	AT2G38080.1 | Symbols: IRX12, LAC4, ATLMCO4, LMCO4 | Laccase/Diphenol oxidase family protein | chr2:15934540-15937352 FORWARD LENGTH=558	Putative multicopper oxidase GMC1 OS=Saccharomyces cerevisiae (strain ATCC 204508 / S288c) GN=GMC1 PE=1 SV=1	25.0785	22.7987	24.6037	21.695	24.1502	23.2692	23.8866	23.4252	23.6475	21.9845	22.7752	22.5879	26.336	26.6763	23.9252	26.7078	Cluster -1	4	9.1	57.073	0	7.3666	2.01379	0.0116634
Pg_S0304.21	eukaryotic translation initiation factor 4G	AT3G60240.4	P39936	AT3G60240.4 | Symbols: EIF4G, CUM2 | eukaryotic translation initiation factor 4G | chr3:22261842-22268295 FORWARD LENGTH=1727	Eukaryotic initiation factor 4F subunit p130 OS=Saccharomyces cerevisiae (strain ATCC 204508 / S288c) GN=TIF4632 PE=1 SV=1	24.6498	24.4695	23.8411	23.25	23.9169	24.0838	24.7616	23.8134	23.4017	23.1156	24.4798	23.0984	25.0016	24.9999	24.8798	25.0192	Cluster -1	3	4	200.89	0	10.252	1.92545	0.0141339
Pg_S0905.17	transportin 1	AT2G16950.1	Q8H0U4	AT2G16950.1 | Symbols: TRN1, ATTRN1 | transportin 1 | chr2:7353939-7360637 FORWARD LENGTH=895	Transportin-1 OS=Arabidopsis thaliana GN=TRN1 PE=1 SV=1	25.9233	24.7598	25.4017	23.9493	25.3341	25.2874	26.0313	25.7638	25.0253	25.0965	25.2322	24.929	26.2349	26.16	26.2731	26.071	Cluster -1	1	14.5	99.007	0	22.149	1.88013	0.015618
Pg_S6822.2	cytochrome P450, family 71, subfamily A, polypeptide 25	AT3G48280.1	Q06367	AT3G48280.1 | Symbols: CYP71A25 | cytochrome P450, family 71, subfamily A, polypeptide 25 | chr3:17879594-17881164 FORWARD LENGTH=490	Cytochrome P450 1A1 OS=Cavia porcellus GN=CYP1A1 PE=1 SV=1	25.7766	24.8791	23.3365	23.5006	23.0706	24.4965	24.042	22.7493	23.2967	24.494	23.5039	23.0942	25.8526	26.3003	26.1061	26.2426	Cluster -1	5	19.5	57.512	0	25.255	2.73292	0.00242315
Pg_S4409.12	expansin A1	AT1G69530.3	P58738	AT1G69530.3 | Symbols: ATEXPA1, EXP1, AT-EXP1, ATEXP1, ATHEXP ALPHA 1.2, EXPA1 | expansin A1 | chr1:26142034-26143200 FORWARD LENGTH=275	Expansin-B1 OS=Zea mays GN=EXPB1 PE=1 SV=2	23.8152	24.103	24.0885	25.1123	22.4991	22.8827	24.0938	23.2268	24.5249	23.668	22.523	22.848	26.6334	26.706	26.5853	26.6802	Cluster -1	3	19.3	35.952	0	41.806	4.75769	2.95674e-05
Pg_S2478.3	SEC14 cytosolic factor family protein / phosphoglyceride transfer family protein	AT3G46450.2	F4JVA6	AT3G46450.2 | Symbols: | SEC14 cytosolic factor family protein / phosphoglyceride transfer family protein | chr3:17093297-17095319 REVERSE LENGTH=494	Phosphatidylinositol/phosphatidylcholine transfer protein SFH6 OS=Arabidopsis thaliana GN=SFH6 PE=2 SV=1	23.789	24.9178	23.0541	24.1814	23.3808	23.4677	23.5205	22.7378	24.525	23.9903	22.8899	23.2269	24.8709	24.9192	24.573	24.8467	Cluster -1	2	20.8	74.787	0	18.254	1.79423	0.0187951
Pg_S2396.18	tubulin folding cofactor E / Pfifferling (PFI)	AT1G71440.1	Q01397	AT1G71440.1 | Symbols: PFI, TFC E | tubulin folding cofactor E / Pfifferling (PFI) | chr1:26921271-26924373 REVERSE LENGTH=531	Dynactin, 150 kDa isoform OS=Neurospora crassa (strain ATCC 24698 / 74-OR23-1A / CBS 708.71 / DSM 1257 / FGSC 987) GN=ro-3 PE=3 SV=3	24.6789	23.5974	23.4303	24.6171	23.6704	22.1547	24.7631	22.5204	23.9904	23.5006	22.7151	23.2795	24.9216	24.8617	24.7786	24.8096	Cluster -1	3	12.2	53.062	0	7.5058	1.46244	0.0389324
Pg_S0439.48	ATPase, V0/A0 complex, subunit C/D	AT3G28715.1	Q9VCQ3	AT3G28715.1 | Symbols: | ATPase, V0/A0 complex, subunit C/D | chr3:10778025-10780350 FORWARD LENGTH=351	Probable V-type proton ATPase subunit d 2 OS=Drosophila melanogaster GN=VhaAC39-2 PE=2 SV=1	27.9031	27.6636	27.6017	28.0288	27.4612	27.3567	27.5773	27.4386	27.7752	27.8102	27.5502	27.5348	28.1371	28.2887	28.2046	28.2028	Cluster -1	3	54.4	40.607	0	107.44	4.41477	6.22819e-05
Pg_S0859.22	HXXXD-type acyl-transferase family protein	AT1G03495.1	Q9ZTK5	AT1G03495.1 | Symbols: | HXXXD-type acyl-transferase family protein | chr1:873436-874832 FORWARD LENGTH=465	Deacetylvindoline O-acetyltransferase OS=Catharanthus roseus GN=DAT PE=1 SV=1	25.0428	23.7227	22.8903	24.215	22.3377	23.5936	23.4527	22.1603	23.8075	23.7263	22.8334	22.2931	25.8962	25.8883	25.7527	26.0103	Cluster -1	1	21.2	47.356	0.0030303	3.2202	3.68695	0.00030267
Pg_S4157.2	Ras-related small GTP-binding family protein	AT2G44610.1	Q9SMR4	AT2G44610.1 | Symbols: RAB6, ATRABH1B, ATRAB6A, RAB6A | Ras-related small GTP-binding family protein | chr2:18411778-18413883 REVERSE LENGTH=208	Ras-related protein RABH1c OS=Arabidopsis thaliana GN=RABH1C PE=1 SV=1	25.37	26.0204	25.4283	26.0167	25.723	25.7697	25.6766	25.4394	25.3796	25.3995	25.5219	25.5089	25.9232	26.5218	26.5806	26.7434	Cluster -1	4	29.9	21.887	0	18.182	2.9595	0.00147624
Pg_S3866.1	WPP domain-interacting protein 2	AT1G68910.1	Q8L7E5	AT1G68910.1 | Symbols: WIT2 | WPP domain-interacting protein 2 | chr1:25908234-25910485 REVERSE LENGTH=627	WPP domain-interacting tail-anchored protein 1 OS=Arabidopsis thaliana GN=WIT1 PE=1 SV=2	25.0401	26.021	24.2452	24.9526	25.04	24.3713	24.7535	25.0275	24.727	24.5882	24.6827	24.1185	25.782	25.7374	25.9572	25.6665	Cluster -1	3	8	59.297	0	10.703	2.1205	0.00927579
Pg_S1885.42	BCL-2-associated athanogene 7	AT5G62390.1	Q9LVA0	AT5G62390.1 | Symbols: ATBAG7, BAG7 | BCL-2-associated athanogene 7 | chr5:25052377-25054170 REVERSE LENGTH=446	BAG family molecular chaperone regulator 7 OS=Arabidopsis thaliana GN=BAG7 PE=1 SV=1	23.3669	25.1695	22.9006	24.162	23.9212	23.8112	23.9502	22.7356	23.3128	22.9243	23.1957	22.8893	25.2742	25.2061	25.5615	25.2871	Cluster -1	2	24.7	28.721	0	14.745	2.97403	0.00143031
Pg_S3733.15	Tetratricopeptide repeat (TPR)-like superfamily protein	AT5G41950.1	unknown	AT5G41950.1 | Symbols: | Tetratricopeptide repeat (TPR)-like superfamily protein | chr5:16785825-16789360 FORWARD LENGTH=565	unknown	23.1282	24.5599	23.519	25.0354	23.3883	24.2491	23.2959	22.2331	22.6449	23.356	22.1744	23.2562	24.6286	24.7675	24.7627	24.7476	Cluster -1	1	5.7	80.775	0	8.5872	2.05063	0.0107673
Pg_S0753.7	Galactosyltransferase family protein	AT1G05170.2	Q8L7M1	AT1G05170.2 | Symbols: | Galactosyltransferase family protein | chr1:1491460-1493931 REVERSE LENGTH=407	Probable beta-1,3-galactosyltransferase 14 OS=Arabidopsis thaliana GN=B3GALT14 PE=2 SV=1	22.6373	25.3286	24.3628	25.0876	24.4922	22.7233	23.6273	23.2429	23.4132	22.8961	22.6392	22.9896	26.6644	26.7087	26.6162	26.6531	Cluster -1	1	4.4	33.294	0.00073511	3.743	4.19834	9.98903e-05
Pg_S1003.6	Amidase family protein	AT4G34880.1	unknown	AT4G34880.1 | Symbols: | Amidase family protein | chr4:16615549-16617424 FORWARD LENGTH=466	unknown	23.257	24.2894	23.9828	24.4864	23.2498	24.1127	23.5961	22.4756	23.3615	23.2021	23.4092	23.1035	24.5343	24.6252	24.5639	24.5681	Cluster -1	3	10.3	53.37	0	9.9511	2.37995	0.00526877
Pg_S5964.5	sucrose synthase 6	AT1G73370.1	B8HCF8	AT1G73370.1 | Symbols: SUS6, ATSUS6 | sucrose synthase 6 | chr1:27584533-27588326 REVERSE LENGTH=942	D-inositol 3-phosphate glycosyltransferase OS=Arthrobacter chlorophenolicus (strain A6 / ATCC 700700 / DSM 12829 / JCM 12360) GN=mshA PE=3 SV=1	23.227	25.0125	24.273	25.2691	23.4584	22.1567	26.1261	23.8649	22.6572	23.7077	22.2712	24.4037	26.2257	26.2304	26.0883	26.071	Cluster -1	6	8.5	100.23	0	14.15	1.86969	0.015952
Pg_S7486.3	COP1-interacting protein 7	AT4G27430.1	unknown	AT4G27430.1 | Symbols: CIP7 | COP1-interacting protein 7 | chr4:13718817-13722736 FORWARD LENGTH=1058	unknown	24.3383	25.3762	23.7133	24.6513	22.857	23.4657	24.3276	22.9881	23.0499	23.0332	21.8486	22.349	25.8129	25.8266	25.6966	25.8347	Cluster -1	4	5.4	102.01	0	11.02	4.69742	3.37518e-05
Pg_S4800.12	glycosyl hydrolase 9B7	AT1G75680.1	P23666	AT1G75680.1 | Symbols: AtGH9B7, GH9B7 | glycosyl hydrolase 9B7 | chr1:28417215-28419231 REVERSE LENGTH=525	Endoglucanase 2 (Fragment) OS=Persea americana GN=CEL2 PE=2 SV=1	23.4763	23.7009	23.7065	24.3587	22.6187	24.8967	25.0032	23.908	23.2432	23.9734	22.8292	23.7195	25.664	25.2491	25.5783	25.3795	Cluster -1	3	9.7	57.897	0	10.23	2.362	0.00547681
Pg_S3316.5	COP1-interacting protein 7	AT4G27430.1	unknown	AT4G27430.1 | Symbols: CIP7 | COP1-interacting protein 7 | chr4:13718817-13722736 FORWARD LENGTH=1058	unknown	24.4567	24.2296	24.1808	23.8928	23.9486	23.438	24.3366	23.2053	22.7021	22.3866	23.294	25.5967	25.3694	25.4906	25.7938	25.4793	Cluster -1	5	6.3	131.52	0	12.555	1.86203	0.0162162
Pg_S2748.17	tonoplast monosaccharide transporter2	AT4G35300.1	Q9XSC2	AT4G35300.1 | Symbols: TMT2 | tonoplast monosaccharide transporter2 | chr4:16796432-16799071 REVERSE LENGTH=739	Solute carrier family 2, facilitated glucose transporter member 3 (Fragment) OS=Oryctolagus cuniculus GN=SLC2A3 PE=2 SV=1	25.2443	23.1998	24.161	25.542	24.782	23.512	24.3748	23.9679	23.0808	22.8318	22.3971	23.8243	26.3728	26.0105	26.4139	25.8839	Cluster -1	5	11.9	84.312	0	15.165	3.5564	0.00040165
Pg_S2428.28	receptor-like kinase 1	AT1G48480.1	Q9LDS6	AT1G48480.1 | Symbols: RKL1 | receptor-like kinase 1 | chr1:17918475-17920743 FORWARD LENGTH=655	Putative cysteine-rich receptor-like protein kinase 32 OS=Arabidopsis thaliana GN=CRK32 PE=3 SV=1	24.7773	24.9279	24.6208	25.0614	23.6624	23.99	25.1251	24.197	22.2797	22.5021	22.189	23.1952	28.1575	28.287	28.03	27.9698	Cluster -1	3	37.8	69.051	0	70.792	8.73342	6.92559e-09
Pg_S5378.2	flower-specific, phytochrome-associated protein phosphatase 3	AT3G19980.1	P34430	AT3G19980.1 | Symbols: ATFYPP3, EMB2736, STPP, FYPP3 | flower-specific, phytochrome-associated protein phosphatase 3 | chr3:6962008-6964761 FORWARD LENGTH=303	Uncharacterized protein F44B9.9 OS=Caenorhabditis elegans GN=F44B9.9 PE=4 SV=2	23.3785	24.1793	24.6417	24.6331	24.9777	22.5496	23.73	24.9882	23.2636	21.4729	22.398	25.0426	25.4981	25.886	26.2467	25.9856	Cluster -1	6	27.1	34.788	0	24.003	1.8719	0.0158842
Pg_S1097.26	clathrin adaptor complexes medium subunit family protein	AT5G05010.1	P43621	AT5G05010.1 | Symbols: | clathrin adaptor complexes medium subunit family protein | chr5:1477137-1479872 FORWARD LENGTH=527	Coatomer subunit delta OS=Saccharomyces cerevisiae (strain ATCC 204508 / S288c) GN=RET2 PE=1 SV=3	26.6655	26.5764	27.0437	26.729	26.5027	26.5649	26.5222	26.3781	26.7949	25.8107	25.9297	25.9807	27.0681	27.2373	27.169	27.1102	Cluster -1	10	29.3	50.439	0	32.825	3.12111	0.00103289
Pg_S1415.9	glutamate dehydrogenase 1	AT5G18170.1	Q9USN5	AT5G18170.1 | Symbols: GDH1 | glutamate dehydrogenase 1 | chr5:6006172-6008248 FORWARD LENGTH=411	Probable NAD-specific glutamate dehydrogenase OS=Schizosaccharomyces pombe (strain 972 / ATCC 24843) GN=gdh2 PE=3 SV=1	24.2207	24.3751	24.2084	24.2352	23.7634	23.256	24.0814	23.1216	23.2644	23.4512	23.0835	25.1854	25.3154	25.6372	25.4446	25.3027	Cluster -1	3	47	44.512	0	11.047	2.78989	0.00213783
Pg_S0708.6	FAD-binding Berberine family protein	AT4G20840.1	P93762	AT4G20840.1 | Symbols: | FAD-binding Berberine family protein | chr4:11157916-11159535 FORWARD LENGTH=539	Hexose oxidase OS=Chondrus crispus GN=HOX PE=1 SV=2	23.703	24.0059	24.3026	24.4018	23.1243	24.2527	23.8588	23.9183	23.0677	23.1423	21.777	23.2087	25.9297	25.9604	25.8529	25.8928	Cluster -1	3	14.3	60.109	0	15.028	5.41134	7.3022e-06
Pg_S2579.3	glycosyl hydrolase 9A1	AT5G49720.1	P38534	AT5G49720.1 | Symbols: ATGH9A1, TSD1, DEC, KOR, RSW2, IRX2, KOR1, GH9A1 | glycosyl hydrolase 9A1 | chr5:20197765-20200168 REVERSE LENGTH=621	Endoglucanase CX (Fragment) OS=Prunus persica PE=2 SV=1	22.4699	25.4445	23.1055	24.9006	22.505	23.5294	24.1056	23.5417	22.7057	22.782	22.7529	23.9941	26.8559	26.8351	26.9778	26.6968	Cluster -1	5	10.6	68.306	0	12.064	3.83625	0.000218846
Pg_S0493.5	clathrin adaptor complexes medium subunit family protein	AT5G05010.1	P43621	AT5G05010.1 | Symbols: | clathrin adaptor complexes medium subunit family protein | chr5:1477137-1479872 FORWARD LENGTH=527	Coatomer subunit delta OS=Saccharomyces cerevisiae (strain ATCC 204508 / S288c) GN=RET2 PE=1 SV=3	28.8201	28.8417	28.8629	28.9662	28.7672	28.6991	28.772	28.8258	28.546	28.4435	28.3185	28.6127	29.607	29.6448	29.6674	29.6404	Cluster -1	4	38.4	58.121	0	113.01	9.27408	2.36504e-09
Pg_S0102.5	unknown	unknown	unknown	unknown	unknown	26.117	26.3638	26.0307	26.6267	25.8599	26.0474	26.1069	25.7071	25.6296	25.7633	25.7271	25.7566	26.979	27.3869	27.0772	27.081	Cluster -1	8	27.7	55.583	0	41.725	6.02967	1.94174e-06
Pg_S0252.5	hydroxycinnamoyl-CoA shikimate/quinate hydroxycinnamoyl transferase	AT5G48930.1	Q8W1W9	AT5G48930.1 | Symbols: HCT | hydroxycinnamoyl-CoA shikimate/quinate hydroxycinnamoyl transferase | chr5:19836654-19838092 REVERSE LENGTH=433	Malonyl-coenzyme:anthocyanin 5-O-glucoside-6'''-O-malonyltransferase OS=Salvia splendens GN=5MAT1 PE=1 SV=1	24.2328	24.95	23.6362	24.4307	23.0177	23.4957	23.6954	23.2801	22.8615	22.7246	22.2522	23.6404	26.438	26.5412	26.5577	26.5289	Cluster -1	1	31.8	47.91	0	11.436	6.70183	4.70542e-07
Pg_S4273.2	TPX2 (targeting protein for Xklp2) protein family	AT4G32330.1	Q8GYX9	AT4G32330.1 | Symbols: | TPX2 (targeting protein for Xklp2) protein family | chr4:15609801-15611867 FORWARD LENGTH=437	Protein WVD2-like 1 OS=Arabidopsis thaliana GN=WDL1 PE=1 SV=1	24.0416	24.172	24.178	22.9727	24.519	23.5938	23.6672	24.4076	23.3775	24.5305	24.1278	24.0756	26.0869	26.2056	26.3007	26.1567	Cluster -1	3	13.5	51.275	0	10.079	4.66746	3.60994e-05
Pg_S2274.6	N-acetylglucosamine-1-phosphate uridylyltransferase 1	AT1G31070.2	Q09WE7	AT1G31070.2 | Symbols: GlcNAc1pUT1 | N-acetylglucosamine-1-phosphate uridylyltransferase 1 | chr1:11084951-11088361 FORWARD LENGTH=505	UDP-sugar pyrophosphorylase 1 OS=Glycine max GN=USP1 PE=1 SV=1	25.4219	24.6221	25.4242	22.4741	24.6435	25.0068	24.8046	24.7527	24.6393	25.1678	24.476	24.4718	29.3034	29.066	29.1881	29.0648	Cluster -1	2	43.6	54.86	0	64.764	5.73469	3.66144e-06
Pg_S1442.16	unknown	unknown	unknown	unknown	unknown	23.6605	23.8076	24.4763	22.8641	24.3582	23.8614	23.4243	23.9548	22.6731	23.2958	24.3794	24.4114	25.5046	25.317	25.5723	25.525	Cluster -1	4	10.8	92.602	0	13.176	2.66908	0.00278546
Pg_S0970.7	tubulin alpha-5	AT5G19780.1	Q9ZRB0	AT5G19780.1 | Symbols: TUA5 | tubulin alpha-5 | chr5:6687212-6688926 FORWARD LENGTH=450	Tubulin beta-3 chain OS=Triticum aestivum GN=TUBB3 PE=2 SV=1	23.4649	25.0564	25.8669	23.2491	24.5232	24.4509	24.1968	24.7318	24.3857	24.673	24.4489	24.4779	28.4617	28.4412	28.3918	28.36	Cluster -1	3	48.3	52.987	0	29.478	5.65808	4.31445e-06
Pg_S4553.1	myosin 1	AT3G19960.2	P81271	AT3G19960.2 | Symbols: ATM1 | myosin 1 | chr3:6949787-6956736 FORWARD LENGTH=1176	Myosin-11 (Fragments) OS=Sus scrofa GN=MYH11 PE=1 SV=1	23.1583	24.1453	23.5393	22.0767	22.9305	23.9983	23.602	24.2606	23.7024	22.3991	22.7347	24.081	26.0901	26.1017	26.0192	25.8866	Cluster -1	7	8.6	132.14	0	12.115	3.83842	0.000217871
Pg_S0922.32	ARM repeat superfamily protein	AT2G45720.1	Q59MN0	AT2G45720.1 | Symbols: | ARM repeat superfamily protein | chr2:18834468-18836129 FORWARD LENGTH=553	Vacuolar protein 8 OS=Candida albicans (strain SC5314 / ATCC MYA-2876) GN=VAC8 PE=3 SV=3	23.9675	25.0723	25.4596	24.0829	24.683	25.1937	23.2889	24.802	24.3834	23.6574	24.9056	24.6523	26.2852	25.8186	26.0135	26.0472	Cluster -1	5	14.8	117.95	0	29.117	2.03779	0.0110766
Pg_S7964.2	Clathrin light chain protein	AT2G20760.1	Q6Z3A8	AT2G20760.1 | Symbols: | Clathrin light chain protein | chr2:8943279-8945108 REVERSE LENGTH=338	Clathrin light chain 3 OS=Oryza sativa subsp. japonica GN=Os07g0461500 PE=3 SV=1	23.3907	23.2973	24.8655	23.1816	23.2081	22.7429	23.6015	22.6171	22.6799	23.1833	23.0679	23.3823	25.9075	25.8287	23.0765	25.8389	Cluster -1	1	14.4	37.112	0	4.5969	1.88824	0.0153541
Pg_S7572.1	vacuolar ATP synthase subunit H family protein	AT3G42050.1	P41807	AT3G42050.1 | Symbols: | vacuolar ATP synthase subunit H family protein | chr3:14228846-14232228 REVERSE LENGTH=441	V-type proton ATPase subunit H OS=Saccharomyces cerevisiae (strain ATCC 204508 / S288c) GN=VMA13 PE=1 SV=1	26.94	26.5538	27.2432	26.6642	26.5256	26.7015	26.3742	26.4237	26.695	26.3087	26.4139	26.5399	27.2974	27.267	27.2106	27.3303	Cluster -1	2	30.2	51.525	0	39.082	3.63381	0.000340158
Pg_S7119.3	Pyridoxal phosphate (PLP)-dependent transferases superfamily protein	AT1G43710.1	Q9CG20	AT1G43710.1 | Symbols: emb1075 | Pyridoxal phosphate (PLP)-dependent transferases superfamily protein | chr1:16486534-16488298 REVERSE LENGTH=482	Glutamate decarboxylase OS=Lactococcus lactis subsp. lactis (strain IL1403) GN=gadB PE=1 SV=1	29.2519	29.0769	29.3209	29.2805	28.952	28.976	28.9485	28.7921	29.0556	29.078	29.0671	29.0807	29.5912	29.6565	29.5806	29.6377	Cluster -1	14	65.5	35.734	0	96.882	7.20976	1.61138e-07
Pg_S4855.14	profilin 5	AT2G19770.1	Q8H2C8	AT2G19770.1 | Symbols: PRF5 | profilin 5 | chr2:8519885-8521119 REVERSE LENGTH=134	Profilin-2 OS=Artemisia vulgaris PE=1 SV=3	26.4714	26.5707	26.8086	26.5885	26.1077	26.0329	25.8765	25.3905	26.1444	26.331	26.2797	26.109	27.6602	27.7477	27.8742	27.9549	Cluster -1	5	39.6	14.618	0	15.426	7.34151	1.21608e-07
Pg_S0234.17	flavanone 3-hydroxylase	AT3G51240.1	Q944Z5	AT3G51240.1 | Symbols: F3H, TT6, F3'H | flavanone 3-hydroxylase | chr3:19025409-19026658 FORWARD LENGTH=358	Probable 2-oxoglutarate-dependent dioxygenase AOP1 (Fragment) OS=Arabidopsis thaliana GN=AOP1 PE=2 SV=1	24.5355	23.5428	26.2222	26.3575	22.932	24.6515	22.9968	22.9829	23.401	22.4255	21.6688	23.2107	26.9771	27.5278	27.5137	27.4924	Cluster -1	7	31.7	40.507	0	44.818	4.39549	6.48899e-05
Pg_S1296.34	unknown	unknown	unknown	unknown	unknown	23.8079	23.82	24.5016	24.2521	23.219	23.3288	24.2402	23.0357	22.7443	23.1512	24.0499	23.6811	26.0415	25.9524	26.0969	26.0947	Cluster -1	2	8.7	27.007	0	11.034	5.35895	8.12793e-06
Pg_S7465.2	Clathrin, heavy chain	AT3G11130.1	Q10161	AT3G11130.1 | Symbols: | Clathrin, heavy chain | chr3:3482575-3491667 REVERSE LENGTH=1705	Probable clathrin heavy chain OS=Schizosaccharomyces pombe (strain 972 / ATCC 24843) GN=chc1 PE=1 SV=1	31.8155	31.7672	31.8122	31.7579	31.6892	31.6595	31.7012	31.5816	31.6869	31.7357	31.718	31.6973	32.2958	32.3346	32.3276	32.3334	Cluster -1	13	63.9	192.6	0	323.31	11.0489	6.95094e-11
Pg_S4892.3	adenosine kinase 2	AT5G03300.1	Q9SA51	AT5G03300.1 | Symbols: ADK2 | adenosine kinase 2 | chr5:796573-798997 FORWARD LENGTH=345	LOB domain-containing protein 3 OS=Arabidopsis thaliana GN=LBD3 PE=2 SV=1	30.9962	31.0977	31.1236	31.0415	31.0567	31.0141	30.9637	30.9799	30.9071	30.8466	30.9361	30.9389	32.188	32.2136	32.1979	32.2106	Cluster -1	2	87.1	37.289	0	244.98	13.5251	5.6832e-13
Pg_S4601.14	beta-galactosidase 3	AT4G36360.1	Q9C6W4	AT4G36360.1 | Symbols: BGAL3 | beta-galactosidase 3 | chr4:17176840-17181143 REVERSE LENGTH=856	Beta-galactosidase 15 OS=Arabidopsis thaliana GN=BGAL15 PE=2 SV=1	24.4594	24.9631	23.2831	23.569	22.388	26.1824	22.9091	22.5661	23.126	21.553	22.4737	23.3564	27.2258	27.7943	27.3603	27.2879	Cluster -1	11	25.6	94.303	0	39.951	3.6936	0.000298675
Pg_S3761.3	unknown	unknown	unknown	unknown	unknown	25.0256	25.1103	25.2539	25.2546	25.1526	25.3241	24.9774	24.988	25.0049	25.1235	25.1348	25.2639	25.6819	25.7368	25.7274	25.7454	Cluster -1	4	8	83.857	0	18.148	4.89684	2.19102e-05
Pg_S3584.22	phospholipase D delta	AT4G35790.1	Q9LTG5	AT4G35790.1 | Symbols: ATPLDDELTA, PLDDELTA | phospholipase D delta | chr4:16955774-16959875 REVERSE LENGTH=868	Callose synthase 4 OS=Arabidopsis thaliana GN=CALS4 PE=3 SV=2	28.8928	28.6953	28.9789	29.024	28.9268	28.862	28.8507	28.7922	28.775	28.8322	28.734	28.973	30.0762	30.1027	30.0543	29.9871	Cluster -1	7	40.7	96.396	0	138.95	9.08607	3.40559e-09
Pg_S3265.4	Calcium-binding EF hand family protein	AT5G08580.1	Q05186	AT5G08580.1 | Symbols: | Calcium-binding EF hand family protein | chr5:2780976-2782961 REVERSE LENGTH=391	Reticulocalbin-1 OS=Mus musculus GN=Rcn1 PE=1 SV=1	26.3526	26.3404	26.3296	26.3271	26.1949	26.2183	26.3459	25.7828	26.3172	26.1445	26.3659	26.1354	27.2018	27.0136	26.9085	27.1915	Cluster -1	3	11.9	124.49	0	24.233	5.22248	1.08981e-05
Pg_S2961.15	ferredoxin-related	AT1G02180.1	unknown	AT1G02180.1 | Symbols: | ferredoxin-related | chr1:413619-414505 REVERSE LENGTH=226	unknown	24.1401	25.6038	24.3482	24.9018	24.7843	24.7968	24.5323	24.5598	24.3899	22.7257	24.6389	24.3623	28.1169	28.2136	28.1627	28.2143	Cluster -1	1	26.3	23.416	0	43.426	6.13307	1.55832e-06
Pg_S2452.2	AAA-type ATPase family protein	AT2G27600.1	Q6MDI5	AT2G27600.1 | Symbols: SKD1, VPS4, ATSKD1 | AAA-type ATPase family protein | chr2:11781226-11783730 FORWARD LENGTH=435	ATP-dependent zinc metalloprotease FtsH OS=Protochlamydia amoebophila (strain UWE25) GN=ftsH PE=3 SV=1	28.6478	28.876	28.5941	28.6777	28.3241	28.4691	28.4231	28.2661	28.5542	28.4736	28.4722	28.4621	29.3342	29.4361	29.3998	29.3393	Cluster -1	4	44.6	77.569	0	114.27	8.40027	1.36746e-08
Pg_S2403.11	cytochrome P450, family 86, subfamily C, polypeptide 1	AT1G24540.1	Q5QQX7	AT1G24540.1 | Symbols: CYP86C1 | cytochrome P450, family 86, subfamily C, polypeptide 1 | chr1:8699751-8701319 FORWARD LENGTH=522	Aromatase OS=Canis familiaris GN=CYP19A1 PE=2 SV=1	24.2658	24.2023	23.584	23.7467	24.4906	23.4149	21.8724	22.7973	23.1394	22.0575	23.0166	23.1338	27.5772	27.5315	27.6451	27.6081	Cluster -1	1	17.2	62.46	0	35.121	6.23705	1.24545e-06
Pg_S2381.6	3-oxo-5-alpha-steroid 4-dehydrogenase family protein	AT2G16530.1	O94511	AT2G16530.1 | Symbols: | 3-oxo-5-alpha-steroid 4-dehydrogenase family protein | chr2:7163276-7165064 REVERSE LENGTH=343	Putative enoyl reductase C646.07c OS=Schizosaccharomyces pombe (strain 972 / ATCC 24843) GN=SPBC646.07c PE=3 SV=1	24.0309	24.2409	23.861	23.9159	22.8713	23.5184	21.7353	22.6062	22.627	23.2591	23.0633	23.0057	27.0845	27.1973	27.1433	27.1249	Cluster -1	4	24.1	30.008	0	13.036	8.09432	2.55938e-08
Pg_S1858.19	xyloglucan endotransglucosylase/hydrolase 7	AT4G37800.1	P32623	AT4G37800.1 | Symbols: XTH7 | xyloglucan endotransglucosylase/hydrolase 7 | chr4:17775703-17777372 REVERSE LENGTH=293	Probable glycosidase CRH2 OS=Saccharomyces cerevisiae (strain ATCC 204508 / S288c) GN=UTR2 PE=1 SV=3	24.5144	22.7829	24.3259	23.5812	24.4405	24.0358	23.2835	22.5125	22.9576	23.277	22.7102	22.1982	27.4059	27.6303	27.5998	27.7016	Cluster -1	2	44.6	22.762	0	94.116	6.1715	1.43264e-06
Pg_S1744.3	MLP-like protein 43	AT1G70890.1	Q9SSK9	AT1G70890.1 | Symbols: MLP43 | MLP-like protein 43 | chr1:26725912-26726489 REVERSE LENGTH=158	MLP-like protein 28 OS=Arabidopsis thaliana GN=MLP28 PE=1 SV=1	24.9453	24.238	23.6971	23.6736	24.7113	22.9679	22.7646	22.5258	23.6896	21.7853	23.327	22.2373	28.6524	28.7786	28.7384	28.7674	Cluster -1	5	66.9	16.914	0	44.447	6.586	6.00603e-07
Pg_S1678.59	Coatomer, alpha subunit	AT1G62020.1	Q8TAF3	AT1G62020.1 | Symbols: | Coatomer, alpha subunit | chr1:22919814-22923728 FORWARD LENGTH=1216	WD repeat-containing protein 48 OS=Homo sapiens GN=WDR48 PE=1 SV=1	28.3901	28.516	28.5899	28.4213	28.3148	28.2795	28.303	28.3109	28.2735	28.2794	28.2256	28.3221	29.0006	29.0274	29.0629	28.9606	Cluster -1	1	38	135.76	0	121.95	9.16257	2.9356e-09
Pg_S6477.1	Late embryogenesis abundant (LEA) hydroxyproline-rich glycoprotein family	AT2G27260.1	Q9SJ52	AT2G27260.1 | Symbols: | Late embryogenesis abundant (LEA) hydroxyproline-rich glycoprotein family | chr2:11669769-11670500 FORWARD LENGTH=243	Protein YLS9 OS=Arabidopsis thaliana GN=YLS9 PE=2 SV=1	24.3285	23.3504	24.3435	24.2216	24.1343	23.0617	23.4568	22.7424	21.889	25.3696	22.7777	22.1758	26.4742	26.3236	26.317	26.3472	Cluster -1	2	20.1	27.026	0	79.289	3.12593	0.00102294
Pg_S3584.5	plasma membrane intrinsic protein 3	AT4G35100.1	Q8LAI1	AT4G35100.1 | Symbols: PIP3, PIP3A, PIP2;7, SIMIP | plasma membrane intrinsic protein 3 | chr4:16708672-16709958 FORWARD LENGTH=280	Probable aquaporin NIP7-1 OS=Arabidopsis thaliana GN=NIP7-1 PE=2 SV=2	23.5878	24.1972	24.763	25.1322	24.5015	23.8374	23.2642	22.539	23.7484	23.1641	24.4585	22.8408	27.3979	27.1272	27.3886	27.2574	Cluster -1	2	11.2	29.366	0	8.6272	5.1452	1.28444e-05
Pg_S0981.31	UDP-glucose 6-dehydrogenase family protein	AT5G15490.1	P39861	AT5G15490.1 | Symbols: | UDP-glucose 6-dehydrogenase family protein | chr5:5027872-5029314 REVERSE LENGTH=480	Protein CapL OS=Staphylococcus aureus GN=capL PE=3 SV=1	24.1944	24.7985	23.8341	24.0022	23.5441	24.1809	23.6825	23.0993	22.8527	22.9157	24.1394	22.1916	26.2328	26.2133	26.0532	26.4918	Cluster -1	1	49.6	52.981	0	37.32	5.08397	1.46423e-05
Pg_S5153.11	regulatory particle triple-A 1A	AT1G53750.1	P54812	AT1G53750.1 | Symbols: RPT1A | regulatory particle triple-A 1A | chr1:20065921-20068324 REVERSE LENGTH=426	Transitional endoplasmic reticulum ATPase homolog 2 OS=Caenorhabditis elegans GN=cdc-48.2 PE=1 SV=2	28.8472	28.6964	28.7302	28.5571	28.6448	28.6591	28.6178	28.3932	28.6906	28.657	28.5931	28.646	29.2585	29.1897	29.0954	29.1866	Cluster -1	10	53.2	47.822	0	143.52	5.38185	7.77038e-06
Pg_S0713.22	Stress responsive A/B Barrel Domain	AT5G22580.1	Q9LUV2	AT5G22580.1 | Symbols: | Stress responsive A/B Barrel Domain | chr5:7502709-7503137 FORWARD LENGTH=111	Probable protein Pop3 OS=Arabidopsis thaliana GN=At3g17210 PE=1 SV=1	22.7742	22.8978	23.9539	24.1417	22.9772	23.55	23.8899	22.3089	22.9929	23.1639	22.9892	22.9861	28.1305	28.1209	28.1602	28.089	Cluster -1	2	51.9	12.217	0	12.467	7.98085	3.2521e-08
Pg_S5120.7	BRI1 suppressor 1 (BSU1)-like 3	AT2G27210.1	Q9K907	AT2G27210.1 | Symbols: BSL3 | BRI1 suppressor 1 (BSU1)-like 3 | chr2:11630188-11636182 FORWARD LENGTH=1006	Bis(5'-nucleosyl)-tetraphosphatase PrpE [asymmetrical] OS=Bacillus halodurans (strain ATCC BAA-125 / DSM 18197 / FERM 7344 / JCM 9153 / C-125) GN=prpE PE=3 SV=1	25.4681	25.6343	25.7568	25.7672	25.7961	25.72	25.7919	25.3924	25.4786	25.6574	25.6358	25.4707	26.2974	26.395	26.4458	26.3928	Cluster -1	2	13.3	106.54	0	31.247	5.34477	8.38161e-06
Pg_S8532.1	Sec14p-like phosphatidylinositol transfer family protein	AT1G72160.1	Q8NHP6	AT1G72160.1 | Symbols: | Sec14p-like phosphatidylinositol transfer family protein | chr1:27153823-27155609 REVERSE LENGTH=490	Motile sperm domain-containing protein 2 OS=Homo sapiens GN=MOSPD2 PE=1 SV=1	26.3162	24.551	23.6818	24.9338	23.7281	24.471	22.1903	23.1648	24.1161	22.698	23.948	23.089	27.2039	27.5353	27.5244	27.5112	Cluster -1	2	26.3	65.301	0	75.902	4.43816	5.92481e-05
Pg_S3153.2	pfkB-like carbohydrate kinase family protein	AT5G58730.1	unknown	AT5G58730.1 | Symbols: | pfkB-like carbohydrate kinase family protein | chr5:23723627-23725324 REVERSE LENGTH=353	unknown	23.4239	24.1469	24.8	24.365	21.9721	24.1129	22.3479	23.2614	23.3582	21.8054	24.1421	22.2002	26.7028	26.8132	26.8237	26.8913	Cluster -1	2	75.5	34.374	0	56.536	4.49817	5.19816e-05
Pg_S2327.6	O-methyltransferase family protein	AT4G35160.1	Q0IP69	AT4G35160.1 | Symbols: | O-methyltransferase family protein | chr4:16730989-16732808 REVERSE LENGTH=382	Naringenin 7-O-methyltransferase OS=Oryza sativa subsp. japonica GN=Os12g0240900 PE=1 SV=2	23.7563	23.2852	24.3565	23.8862	22.6167	23.6932	23.3698	22.9095	24.1813	22.7259	24.4805	22.195	27.0824	27.0567	27.0534	27.1332	Cluster -1	6	33.8	38.779	0	33.742	5.32239	8.79205e-06
Pg_S0222.3	hexokinase 2	AT2G19860.1	Q4U3Y2	AT2G19860.1 | Symbols: ATHXK2, HXK2 | hexokinase 2 | chr2:8570818-8573762 FORWARD LENGTH=502	Hexokinase-1 OS=Neosartorya fumigata (strain ATCC MYA-4609 / Af293 / CBS 101355 / FGSC A1100) GN=hxkA PE=2 SV=1	26.4082	26.2426	26.3637	26.2609	26.0706	26.0394	26.1548	26.2597	26.4119	25.7555	26.5008	26.2161	27.1835	26.9899	27.2772	27.1037	Cluster -1	7	31.9	53.587	0	46.951	4.66242	3.64364e-05
Pg_S0866.15	unknown	unknown	unknown	unknown	unknown	24.9808	25.1323	23.5396	24.8188	24.231	22.7841	23.464	23.0553	24.8879	21.1915	25.0948	22.4814	27.5331	27.6228	27.5427	27.6998	Cluster -1	3	12.2	46.313	0	25.911	3.47715	0.000475878
Pg_S6491.1	terpene synthase 21	AT5G23960.1	Q0JF02	AT5G23960.1 | Symbols: ATTPS21, TPS21 | terpene synthase 21 | chr5:8092969-8095128 FORWARD LENGTH=547	Syn-copalyl diphosphate synthase OS=Oryza sativa subsp. japonica GN=CPS4 PE=2 SV=1	23.8972	23.3219	22.7745	24.3562	23.6717	23.6694	23.575	23.7775	24.0593	23.691	21.775	23.2577	26.0567	26.1192	26.2566	25.9871	Cluster -1	5	24.5	63.783	0	14.93	4.10257	0.000122796
Pg_S3518.16	methionine adenosyltransferase 3	AT2G36880.1	A7MJQ6	AT2G36880.1 | Symbols: MAT3 | methionine adenosyltransferase 3 | chr2:15479721-15480893 REVERSE LENGTH=390	S-adenosylmethionine synthase OS=Cronobacter sakazakii (strain ATCC BAA-894) GN=metK PE=3 SV=1	24.4324	24.4383	23.3564	23.7052	23.4399	24.8848	23.0446	24.066	23.614	23.709	22.423	23.3121	25.4454	25.5343	25.821	25.6665	Cluster -1	3	42.6	42.696	0	8.914	3.26287	0.000760299
Pg_S0263.12	tubulin alpha-5	AT5G19780.1	Q9ZRB0	AT5G19780.1 | Symbols: TUA5 | tubulin alpha-5 | chr5:6687212-6688926 FORWARD LENGTH=450	Tubulin beta-3 chain OS=Triticum aestivum GN=TUBB3 PE=2 SV=1	27.5796	27.6956	27.3427	27.6287	28.1678	28.1216	28.1395	28.0671	27.5088	27.6344	23.1946	27.7154	29.479	29.4812	29.4782	29.5306	Cluster -1	1	61	49.664	0	24.913	1.75053	0.0206845
Pg_S2566.11	Agenet domain-containing protein	AT5G52070.1	unknown	AT5G52070.1 | Symbols: | Agenet domain-containing protein | chr5:21162116-21164717 FORWARD LENGTH=271	unknown	24.1271	24.3947	24.3385	24.4587	25.3664	25.403	25.166	25.2505	25.9468	26.3061	22.5011	22.843	26.533	26.616	26.5184	26.558	Cluster -1	2	29.5	35.355	0	30.174	1.53863	0.0330026
Pg_S4984.2	RNA-binding (RRM/RBD/RNP motifs) family protein with retrovirus zinc finger-like domain	AT1G60650.1	Q99729	AT1G60650.1 | Symbols: | RNA-binding (RRM/RBD/RNP motifs) family protein with retrovirus zinc finger-like domain | chr1:22340089-22342148 FORWARD LENGTH=292	Heterogeneous nuclear ribonucleoprotein A/B OS=Homo sapiens GN=HNRNPAB PE=1 SV=2	23.0503	23.8867	23.5898	22.7093	23.0642	23.6292	24.2573	25.251	24.8009	23.7326	23.1474	22.7184	26.3798	25.7583	25.6123	25.7341	Cluster -1	4	12.1	33.405	0	10.333	2.88052	0.00175194
Pg_S1784.4	RAN GTPase activating protein 2	AT5G19320.1	C3VPR6	AT5G19320.1 | Symbols: RANGAP2 | RAN GTPase activating protein 2 | chr5:6505310-6506947 REVERSE LENGTH=545	Protein NLRC5 OS=Mus musculus GN=Nlrc5 PE=1 SV=2	23.8228	23.6728	22.777	24.0926	22.7613	22.9659	23.0031	25.7745	23.5417	24.2069	23.0874	23.9452	25.3606	25.314	25.7152	25.4573	Cluster -1	1	18.3	59.66	0	21.418	1.75523	0.02047
Pg_S4463.3	strictosidine synthase-like 3	AT1G08470.1	Q9CAZ7	AT1G08470.1 | Symbols: SSL3 | strictosidine synthase-like 3 | chr1:2682262-2683977 REVERSE LENGTH=390	Protein YLS2 OS=Arabidopsis thaliana GN=YLS2 PE=2 SV=1	23.3214	23.8076	22.9409	24.1158	23.5117	22.9221	23.3986	26.4754	23.2418	22.9104	21.9175	23.0802	26.2318	24.2129	26.2146	26.1587	Cluster -1	6	23.1	43.656	0	23.248	1.95412	0.0132638
Pg_S1777.2	Pectinacetylesterase family protein	AT3G05910.1	Q6P988	AT3G05910.1 | Symbols: | Pectinacetylesterase family protein | chr3:1764509-1767240 REVERSE LENGTH=415	Protein notum homolog OS=Homo sapiens GN=NOTUM PE=2 SV=2	23.8781	23.5178	23.6691	23.0354	23.1766	23.6718	22.8202	26.2574	23.9916	24.2556	23.195	23.0889	27.1604	27.2301	27.2233	27.0206	Cluster -1	4	60.6	43.585	0	28.325	3.84359	0.000215517
Pg_S0388.17	subtilisin-like serine protease 2	AT4G34980.1	Q9LLL8	AT4G34980.1 | Symbols: SLP2 | subtilisin-like serine protease 2 | chr4:16656929-16659223 REVERSE LENGTH=764	Xylem serine proteinase 1 OS=Arabidopsis thaliana GN=XSP1 PE=2 SV=1	24.108	23.7714	22.8786	23.1079	23.8416	26.2701	26.4809	22.7886	23.2029	23.7299	22.3854	22.833	26.0368	26.1628	26.1473	23.7186	Cluster -1	3	11.3	81.864	0	13.959	1.45608	0.0394448
Pg_S6190.8	S-adenosyl-L-methionine-dependent methyltransferases superfamily protein	AT1G73600.2	Q6ZIK0	AT1G73600.2 | Symbols: | S-adenosyl-L-methionine-dependent methyltransferases superfamily protein | chr1:27669224-27673400 FORWARD LENGTH=504	Probable tocopherol O-methyltransferase, chloroplastic OS=Oryza sativa subsp. japonica GN=VTE4 PE=2 SV=1	23.3386	24.5808	24.5122	23.9653	25.2791	25.7989	25.3488	23.6427	23.8618	24.1337	22.5896	24.1092	25.8498	26.016	26.2694	25.862	Cluster -1	5	11.9	68.516	0	12.878	2.76305	0.00226484
Pg_S0762.36	cycloartenol synthase 1	AT2G07050.1	B0Y5B4	AT2G07050.1 | Symbols: CAS1 | cycloartenol synthase 1 | chr2:2924629-2930295 FORWARD LENGTH=759	Protostadienol synthase A OS=Neosartorya fumigata (strain CEA10 / CBS 144.89 / FGSC A1163) GN=pdsA PE=3 SV=1	25.4388	24.8278	22.83	23.5873	24.881	24.8768	24.7211	22.951	22.6358	22.7626	22.6645	22.7929	24.8486	24.8845	24.7363	24.6644	Cluster -1	3	11.9	86.153	0	10.502	1.92028	0.0142973
Pg_S5691.4	S-adenosyl-L-methionine-dependent methyltransferases superfamily protein	AT1G73600.2	Q6ZIK0	AT1G73600.2 | Symbols: | S-adenosyl-L-methionine-dependent methyltransferases superfamily protein | chr1:27669224-27673400 FORWARD LENGTH=504	Probable tocopherol O-methyltransferase, chloroplastic OS=Oryza sativa subsp. japonica GN=VTE4 PE=2 SV=1	23.7612	24.9428	23.0643	22.7369	24.2081	24.2226	24.1021	23.2458	23.023	23.2229	22.0547	22.3539	24.2338	24.3072	24.0976	24.1598	Cluster -1	3	22.7	19.674	0	9.3311	1.71505	0.0223371
Pg_S6155.1	Calcium-binding EF-hand family protein	AT4G26470.1	Q39752	AT4G26470.1 | Symbols: | Calcium-binding EF-hand family protein | chr4:13371377-13372343 FORWARD LENGTH=231	Calmodulin OS=Fagus sylvatica GN=CAMF1 PE=2 SV=3	23.5818	23.8886	23.2435	24.2907	24.8881	24.9923	24.936	24.0079	24.8334	21.7116	24.4715	23.2821	25.167	25.2928	25.1297	25.3596	Cluster -1	3	8	62.02	0	9.1536	1.5023	0.0357272
Pg_S0447.12	coatomer gamma-2 subunit, putative / gamma-2 coat protein, putative / gamma-2 COP, putative	AT4G34450.1	Q62726	AT4G34450.1 | Symbols: | coatomer gamma-2 subunit, putative / gamma-2 coat protein, putative / gamma-2 COP, putative | chr4:16471956-16476795 FORWARD LENGTH=886	Serine/threonine-protein kinase ICK OS=Rattus norvegicus GN=Ick PE=1 SV=1	23.3891	24.8735	23.3785	25.6411	26.168	26.211	26.1582	26.6693	25.3566	23.6004	24.1444	24.1653	26.9439	26.8826	26.7295	26.8491	Cluster -1	4	51.1	98.503	0	41.39	3.61505	0.0003541
Pg_S1858.12	tubulin alpha-2 chain	AT1G50010.1	P29515	AT1G50010.1 | Symbols: TUA2 | tubulin alpha-2 chain | chr1:18517737-18519729 FORWARD LENGTH=450	Tubulin beta-7 chain OS=Arabidopsis thaliana GN=TUBB7 PE=2 SV=1	29.326	28.5549	24.8369	27.3523	28.7186	28.7729	29.0274	29.0734	27.1792	22.4659	27.2815	27.3481	30.155	30.2368	30.087	30.2172	Cluster -1	2	77.8	49.609	0	53.514	1.79961	0.0185786
Pg_S1890.1	calreticulin 3	AT1G08450.1	P27825	AT1G08450.1 | Symbols: CRT3, PSL1, EBS2, AtCRT3 | calreticulin 3 | chr1:2668008-2671800 REVERSE LENGTH=424	Calnexin homolog OS=Saccharomyces cerevisiae (strain ATCC 204508 / S288c) GN=CNE1 PE=1 SV=1	24.1844	24.2536	23.3011	23.9314	22.9862	25.1199	25.3	22.2249	25.1193	21.8269	22.2068	23.6989	25.7066	25.6357	25.7255	25.7487	Cluster -1	2	41.1	50.914	0	20.897	1.38749	0.045801
Pg_S3067.6	Pentatricopeptide repeat (PPR) superfamily protein	AT3G48250.1	Q9STK5	AT3G48250.1 | Symbols: | Pentatricopeptide repeat (PPR) superfamily protein | chr3:17870064-17871929 REVERSE LENGTH=621	Pentatricopeptide repeat-containing protein At3g48250, chloroplastic OS=Arabidopsis thaliana GN=At3g48250 PE=2 SV=1	24.2353	24.9574	23.237	23.4405	26.1075	25.9903	26.026	23.4634	26.8474	23.5024	23.4707	22.2601	26.3893	26.4959	26.4135	26.4452	Cluster -1	3	5.4	133.93	0	6.6124	1.35549	0.0490951
Pg_S2784.4	like SEX4 1	AT3G01510.1	G4LTX4	AT3G01510.1 | Symbols: LSF1 | like SEX4 1 | chr3:198855-201682 REVERSE LENGTH=591	Phosphoglucan phosphatase DSP4, amyloplastic OS=Castanea sativa GN=DSP4 PE=1 SV=1	25.7256	24.2618	25.7578	26.0635	26.6642	26.5836	26.7841	26.6338	26.6	26.4277	26.4918	26.509	25.9296	25.7802	25.8225	25.8553	Cluster -2	7	17.8	66.729	0	30.251	2.40972	0.00494129
Pg_S2762.5	ribosomal protein L18	AT3G05590.1	P24558	AT3G05590.1 | Symbols: RPL18 | ribosomal protein L18 | chr3:1621511-1622775 FORWARD LENGTH=187	60S ribosomal protein L18 OS=Salmo salar GN=rpl18 PE=2 SV=1	26.5848	24.2494	26.751	27.3562	26.8371	26.8954	26.7877	27.5211	28.0768	27.6291	28.1765	27.8975	26.3018	26.4933	26.8623	27.0362	Cluster -2	1	29.3	35.21	0	39.64	1.43568	0.04123
Pg_S0052.20	winged-helix DNA-binding transcription factor family protein	AT5G66100.1	D5MCN2	AT5G66100.1 | Symbols: | winged-helix DNA-binding transcription factor family protein | chr5:26427639-26429772 FORWARD LENGTH=453	La-related protein 1 OS=Caenorhabditis elegans GN=larp-1 PE=3 SV=2	27.2586	24.4729	26.5425	27.2014	27.7803	27.7474	27.5449	27.5813	27.3316	27.0451	27.1238	27.0337	25.1607	24.6575	24.7333	24.7002	Cluster -2	3	22.9	30.791	0	28.898	3.46281	0.000490881
Pg_S1252.3	winged-helix DNA-binding transcription factor family protein	AT5G66100.1	D5MCN2	AT5G66100.1 | Symbols: | winged-helix DNA-binding transcription factor family protein | chr5:26427639-26429772 FORWARD LENGTH=453	La-related protein 1 OS=Caenorhabditis elegans GN=larp-1 PE=3 SV=2	25.6801	23.4824	26.0967	26.0617	27.1499	26.6637	27.3056	26.8877	26.6963	26.6688	26.6167	26.6572	24.6719	24.3871	24.459	24.6779	Cluster -2	3	22.9	30.766	0	21.214	3.30408	0.000695157
Pg_S0146.4	hydroxyproline-rich glycoprotein family protein	AT5G16620.1	Q5ZLF0	AT5G16620.1 | Symbols: PDE120, TIC40, ATTIC40 | hydroxyproline-rich glycoprotein family protein | chr5:5450808-5454256 FORWARD LENGTH=447	Hsc70-interacting protein OS=Gallus gallus GN=ST13 PE=2 SV=1	26.4615	26.4768	23.7458	24.4626	28.1397	27.6659	27.9684	28.0683	26.2474	26.6414	26.5132	26.5058	26.3007	23.48	23.5908	26.0447	Cluster -2	10	52	32.998	0	36.188	2.27719	0.0066147
Pg_S2045.7	chaperonin 60 beta	AT1G55490.1	C4K477	AT1G55490.1 | Symbols: CPN60B, LEN1 | chaperonin 60 beta | chr1:20715717-20718673 REVERSE LENGTH=600	60 kDa chaperonin OS=Hamiltonella defensa subsp. Acyrthosiphon pisum (strain 5AT) GN=groL PE=3 SV=1	26.3279	26.155	25.9898	26.1484	27.195	26.4027	26.5118	26.8244	26.0372	25.9946	26.1324	25.9758	26.0259	24.4559	24.3717	24.4778	Cluster -2	2	56.7	64.171	0	31.715	3.34866	0.000632229
Pg_S2124.26	ornithine carbamoyltransferase	AT1G75330.1	A1KJ73	AT1G75330.1 | Symbols: OTC | ornithine carbamoyltransferase | chr1:28266457-28268383 REVERSE LENGTH=375	Ornithine carbamoyltransferase OS=Mycobacterium bovis (strain BCG / Pasteur 1173P2) GN=argF PE=3 SV=1	22.7668	27.2712	25.2174	27.9867	28.5773	28.6622	28.7127	28.6534	28.5035	28.3822	28.4682	28.5713	27.77	27.8502	27.6632	27.7055	Cluster -2	2	60.9	41.494	0	52.829	1.7286	0.0216858
Pg_S7807.1	S18 ribosomal protein	AT4G09800.1	Q73HA7	AT4G09800.1 | Symbols: RPS18C | S18 ribosomal protein | chr4:6173818-6174963 FORWARD LENGTH=152	30S ribosomal protein S13 OS=Wolbachia pipientis wMel GN=rpsM PE=3 SV=1	27.4188	27.6296	28.0594	27.4373	28.3292	28.3446	28.3211	28.3255	28.5302	28.6347	28.4988	28.6334	27.4732	27.6774	27.7391	27.5861	Cluster -2	4	20.8	26.745	0	34.356	5.51052	5.90385e-06
Pg_S7448.1	malate dehydrogenase	AT3G47520.1	B1LZN1	AT3G47520.1 | Symbols: MDH | malate dehydrogenase | chr3:17513657-17514868 FORWARD LENGTH=403	Malate dehydrogenase OS=Methylobacterium radiotolerans (strain ATCC 27329 / DSM 1819 / JCM 2831) GN=mdh PE=3 SV=1	28.5588	28.5988	28.7091	28.652	29.8511	29.8463	29.8258	29.9078	29.8176	29.9858	29.8506	29.9368	28.7038	28.6814	28.7024	28.6979	Cluster -2	1	56.3	43.401	0	136.57	12.9367	1.73486e-12
Pg_S6708.5	UDP-Glycosyltransferase superfamily protein	AT4G01070.1	P34317	AT4G01070.1 | Symbols: GT72B1, UGT72B1 | UDP-Glycosyltransferase superfamily protein | chr4:461858-463300 REVERSE LENGTH=480	Putative UDP-glucuronosyltransferase ugt-60 OS=Caenorhabditis elegans GN=ugt-60 PE=3 SV=2	23.9922	24.4964	24.9258	22.7483	25.0843	24.8612	25.1964	24.7883	24.9843	24.7597	24.445	24.8467	23.9926	24.3633	23.9538	23.6675	Cluster -2	2	15.3	37.415	0	10.132	1.39976	0.0446113
Pg_S2829.3	NAD(P)-linked oxidoreductase superfamily protein	AT1G59960.1	P78736	AT1G59960.1 | Symbols: | NAD(P)-linked oxidoreductase superfamily protein | chr1:22071410-22073067 REVERSE LENGTH=326	NAD(P)H-dependent D-xylose reductase OS=Pachysolen tannophilus GN=XYL1 PE=1 SV=1	29.4351	29.1629	29.2346	29.0402	30.1079	30.3432	30.2358	30.3575	30.1381	30.1948	30.1706	30.1051	29.2509	29.3118	29.2964	29.1416	Cluster -2	2	52.7	59.355	0	247.7	8.16155	2.2291e-08
Pg_S2461.3	Ribosomal protein S6e	AT5G10360.1	P54067	AT5G10360.1 | Symbols: EMB3010, RPS6B | Ribosomal protein S6e | chr5:3258734-3260142 REVERSE LENGTH=249	30S ribosomal protein S6e OS=Methanocaldococcus jannaschii (strain ATCC 43067 / DSM 2661 / JAL-1 / JCM 10045 / NBRC 100440) GN=rps6e PE=3 SV=1	28.5247	28.279	28.4065	28.2811	29.0197	29.0195	28.8997	28.9616	28.7065	28.6091	28.7413	28.7285	28.0918	28.2166	28.265	28.1398	Cluster -2	5	14.5	53.118	0	47.602	7.29517	1.3431e-07
Pg_S2069.2	pyrophosphorylase 6	AT5G09650.1	Q6KZB3	AT5G09650.1 | Symbols: AtPPa6, PPa6 | pyrophosphorylase 6 | chr5:2991331-2993117 REVERSE LENGTH=300	Inorganic pyrophosphatase OS=Picrophilus torridus (strain ATCC 700027 / DSM 9790 / JCM 10055 / NBRC 100828) GN=ppa PE=3 SV=1	24.111	24.0579	24.0957	23.6127	26.7278	26.6764	26.576	27.0395	25.8479	25.6277	26.0233	25.9269	25.2293	25.3765	23.7218	22.2349	Cluster -2	3	27	32.259	0	16.763	3.31032	0.000685569
Pg_S1097.36	unknown	unknown	unknown	unknown	unknown	23.5463	24.8123	24.6806	24.1163	25.7559	25.191	24.995	25.1249	24.6691	24.8356	25.0701	24.675	24.7233	23.1411	24.4041	22.8841	Cluster -2	3	31.5	23.981	0	12.642	1.74838	0.0207787
Pg_S0649.16	unknown	unknown	unknown	unknown	unknown	29.8227	29.8782	30.0125	29.7642	30.6839	30.5844	30.7231	30.6618	30.1808	30.0922	30.2881	30.5248	29.3309	29.4202	29.303	29.5145	Cluster -2	2	40	22.45	0	263.77	7.50055	8.81384e-08
Pg_S0102.68	Ribosomal protein S13/S15	AT3G60770.1	P05762	AT3G60770.1 | Symbols: | Ribosomal protein S13/S15 | chr3:22460525-22461656 REVERSE LENGTH=151	30S ribosomal protein S15 OS=Haloarcula marismortui (strain ATCC 43049 / DSM 3752 / JCM 8966 / VKM B-1809) GN=rps15 PE=1 SV=3	25.7438	25.4272	25.6483	25.1231	26.7682	26.6101	26.6244	26.261	26.2884	26.087	25.7859	25.5758	24.6264	24.741	24.8194	24.5534	Cluster -2	4	23.8	17.118	0	18.174	5.93493	2.38541e-06
Pg_S0588.26	dihydrodipicolinate synthase	AT2G45440.1	Q1INQ6	AT2G45440.1 | Symbols: DHDPS2 | dihydrodipicolinate synthase | chr2:18731294-18732867 FORWARD LENGTH=365	4-hydroxy-tetrahydrodipicolinate synthase OS=Koribacter versatilis (strain Ellin345) GN=dapA PE=3 SV=1	24.767	24.5786	25.2728	23.3668	26.5429	26.6269	26.5176	26.5222	25.7121	25.9454	25.9438	25.8671	25.0853	24.9386	25.1384	25.0252	Cluster -2	2	12.5	40.942	0	16.518	4.16986	0.000106388
Pg_S2894.3	UDP-Glycosyltransferase superfamily protein	AT4G01070.1	P34317	AT4G01070.1 | Symbols: GT72B1, UGT72B1 | UDP-Glycosyltransferase superfamily protein | chr4:461858-463300 REVERSE LENGTH=480	Putative UDP-glucuronosyltransferase ugt-60 OS=Caenorhabditis elegans GN=ugt-60 PE=3 SV=2	23.3379	23.678	23.0561	22.962	25.1932	25.2946	25.7361	25.4022	25.7529	25.3839	25.6081	25.4526	23.7172	24.8131	22.6319	25.0038	Cluster -2	6	13.9	67.34	0	15.214	3.50171	0.000451583
Pg_S7397.3	ascorbate peroxidase 1	AT1G07890.3	P0CP57	AT1G07890.3 | Symbols: APX1, MEE6, CS1, ATAPX1, ATAPX01 | ascorbate peroxidase 1 | chr1:2438005-2439435 FORWARD LENGTH=250	Putative heme-binding peroxidase OS=Cryptococcus neoformans var. neoformans serotype D (strain B-3501A) GN=CNBE3880 PE=3 SV=1	28.6254	28.5865	28.4976	28.5778	29.1515	29.3022	29.234	29.3083	29.2151	29.2062	29.231	29.1568	28.6514	28.6787	28.7279	28.8058	Cluster -2	3	46.6	41.279	0	145.57	8.77784	6.31032e-09
Pg_S7224.3	aldehyde dehydrogenase 2B4	AT3G48000.1	Q6GEV3	AT3G48000.1 | Symbols: ALDH2B4, ALDH2, ALDH2A | aldehyde dehydrogenase 2B4 | chr3:17717082-17719843 REVERSE LENGTH=538	Putative aldehyde dehydrogenase SAR2210 OS=Staphylococcus aureus (strain MRSA252) GN=SAR2210 PE=3 SV=1	27.9084	28.0432	26.7622	28.0611	29.4434	29.5795	29.5682	29.3715	29.0379	28.9706	29.0724	28.8721	27.7084	27.7836	27.6682	27.7212	Cluster -2	17	40.6	80.214	0	155.71	5.29098	9.4023e-06
Pg_S5951.4	nascent polypeptide-associated complex subunit alpha-like protein 2	AT3G49470.1	Q6FJD5	AT3G49470.1 | Symbols: NACA2 | nascent polypeptide-associated complex subunit alpha-like protein 2 | chr3:18341072-18342273 FORWARD LENGTH=217	Nascent polypeptide-associated complex subunit alpha OS=Candida glabrata (strain ATCC 2001 / CBS 138 / JCM 3761 / NBRC 0622 / NRRL Y-65) GN=EGD2 PE=3 SV=1	22.9894	23.2096	23.6345	23.7117	27.1593	27.1086	27.1626	27.0885	25.1776	25.1053	24.9512	24.9859	23.971	24.3342	23.5912	24.0462	Cluster -2	1	35.3	22.826	0	35.12	9.68684	1.03872e-09
Pg_S6026.11	ribosomal protein L14	ATCG00780.1	A1E9M6	ATCG00780.1 | Symbols: RPL14 | ribosomal protein L14 | chrC:80696-81064 REVERSE LENGTH=122	30S ribosomal protein S8, chloroplastic OS=Hordeum vulgare GN=rps8 PE=3 SV=1	27.5032	27.3977	27.4761	27.4936	28.1456	28.2145	28.2545	28.1755	27.8482	27.7826	27.8019	27.7774	27.5776	27.6055	27.6207	27.7044	Cluster -2	1	35.1	15.421	0	24.222	9.57168	1.30131e-09
Pg_S3615.1	pyrophosphorylase 6	AT5G09650.1	Q6KZB3	AT5G09650.1 | Symbols: AtPPa6, PPa6 | pyrophosphorylase 6 | chr5:2991331-2993117 REVERSE LENGTH=300	Inorganic pyrophosphatase OS=Picrophilus torridus (strain ATCC 700027 / DSM 9790 / JCM 10055 / NBRC 100828) GN=ppa PE=3 SV=1	24.2253	23.2313	24.5495	23.6183	29.5211	29.494	29.4972	29.6445	26.8241	27.1188	26.8848	27.0281	25.9458	25.8298	26.2017	25.6567	Cluster -2	7	37.7	33.025	0	40.291	9.86094	7.31404e-10
Pg_S5521.1	UDP-Glycosyltransferase superfamily protein	AT4G01070.1	P34317	AT4G01070.1 | Symbols: GT72B1, UGT72B1 | UDP-Glycosyltransferase superfamily protein | chr4:461858-463300 REVERSE LENGTH=480	Putative UDP-glucuronosyltransferase ugt-60 OS=Caenorhabditis elegans GN=ugt-60 PE=3 SV=2	24.8772	23.4213	24.182	24.1896	27.8801	27.8812	27.8309	27.8837	26.2492	26.2788	26.3523	26.2958	25.4106	25.1802	25.2754	25.6639	Cluster -2	8	27.6	53.573	0	39.544	7.95929	3.39259e-08
Pg_S6920.1	isopropylmalate dehydrogenase 2	AT1G80560.1	Q8NKB8	AT1G80560.1 | Symbols: ATIMD2, IMD2 | isopropylmalate dehydrogenase 2 | chr1:30287833-30290126 FORWARD LENGTH=405	3-isopropylmalate dehydrogenase OS=Blastobotrys adeninivorans GN=LEU2 PE=3 SV=1	28.0695	28.087	28.1791	28.103	29.3576	29.321	29.351	29.3542	28.899	28.8102	29.0151	28.7878	28.4796	28.397	28.5206	28.5792	Cluster -2	12	49.3	43.109	0	143.46	10.1837	3.8931e-10
Pg_S0076.19	Rhodanese/Cell cycle control phosphatase superfamily protein	AT1G17850.2	Q1QPC1	AT1G17850.2 | Symbols: | Rhodanese/Cell cycle control phosphatase superfamily protein | chr1:6146470-6148820 REVERSE LENGTH=448	UPF0176 protein Nham_1078 OS=Nitrobacter hamburgensis (strain X14 / DSM 10229) GN=Nham_1078 PE=3 SV=1	23.4253	22.725	24.6321	24.0212	28.0507	28.0539	28.1339	28.0884	26.4076	26.2182	26.2863	26.2554	25.2037	24.5493	24.5001	24.2889	Cluster -2	3	26.3	19.801	0	85.604	7.20168	1.63867e-07
Pg_S1064.5	phosphoglucose isomerase 1	AT4G24620.1	Q48N88	AT4G24620.1 | Symbols: PGI1, PGI | phosphoglucose isomerase 1 | chr4:12708972-12712610 REVERSE LENGTH=613	Glucose-6-phosphate isomerase OS=Pseudomonas syringae pv. phaseolicola (strain 1448A / Race 6) GN=pgi PE=3 SV=1	27.8651	28.0147	27.9024	27.8939	29.0339	29.0376	29.0027	28.9896	28.5849	28.4678	28.4765	28.5023	28.2188	28.2344	28.3224	28.2359	Cluster -2	2	70.6	34.277	0	138.35	11.1765	5.38413e-11
Pg_S5890.3	Ribosomal protein L18ae/LX family protein	AT2G34480.1	Q8WQI7	AT2G34480.1 | Symbols: | Ribosomal protein L18ae/LX family protein | chr2:14532916-14534161 REVERSE LENGTH=178	60S ribosomal protein L18a OS=Spodoptera frugiperda GN=RpL18A PE=2 SV=1	24.2145	23.3254	24.6461	23.6522	27.1741	27.0753	27.0059	27.0174	26.5416	26.4364	26.6225	26.4872	26.4022	26.2324	26.3201	26.3482	Cluster -2	2	13.5	70.501	0	14.96	7.5887	7.32907e-08
Pg_S5086.1	Eukaryotic aspartyl protease family protein	AT1G25510.1	Q0IU52	AT1G25510.1 | Symbols: | Eukaryotic aspartyl protease family protein | chr1:8959372-8960823 REVERSE LENGTH=483	Aspartic proteinase Asp1 OS=Oryza sativa subsp. japonica GN=ASP1 PE=2 SV=1	23.9004	24.3086	24.7013	22.7461	30.2948	30.3774	30.2934	30.2307	29.6519	29.5976	29.7543	29.5871	28.2351	28.1249	28.0681	27.9224	Cluster -2	6	27.3	46.789	0	143.25	9.48648	1.53264e-09
Pg_S3943.3	Eukaryotic aspartyl protease family protein	AT1G25510.1	Q0IU52	AT1G25510.1 | Symbols: | Eukaryotic aspartyl protease family protein | chr1:8959372-8960823 REVERSE LENGTH=483	Aspartic proteinase Asp1 OS=Oryza sativa subsp. japonica GN=ASP1 PE=2 SV=1	23.4872	23.7215	24.7603	23.2201	29.3451	29.3091	29.3468	29.3687	28.2322	28.0487	28.1618	28.1779	27.1022	27.4103	27.3075	27.2845	Cluster -2	6	27.3	46.828	0	51.406	9.66254	1.09279e-09
Pg_S2768.18	unknown	unknown	unknown	unknown	unknown	23.5158	24.3312	23.5711	22.6935	29.9083	29.9475	29.9809	29.9258	28.5004	28.4319	28.4199	28.4937	27.472	27.4007	27.4231	27.6664	Cluster -2	14	51	45.109	0	94.081	10.441	2.33358e-10
Pg_S3757.2	60S acidic ribosomal protein family	AT5G47700.1	Q9HFQ6	AT5G47700.1 | Symbols: | 60S acidic ribosomal protein family | chr5:19328019-19328724 REVERSE LENGTH=113	60S acidic ribosomal protein P1-B OS=Candida albicans GN=RPP1B PE=1 SV=1	23.9022	24.2642	24.5434	24.4237	27.1767	27.1173	27.2958	27.103	26.8107	26.8453	27.1967	26.7392	25.857	25.9212	26.0214	25.9841	Cluster -2	2	49.6	11.493	0	17.936	9.85899	7.33355e-10
Pg_S1500.7	cullin-associated and neddylation dissociated	AT2G02560.1	Q5BAH2	AT2G02560.1 | Symbols: CAND1, ATCAND1, ETA2, TIP120, HVE | cullin-associated and neddylation dissociated | chr2:690345-697342 FORWARD LENGTH=1219	Cullin-associated NEDD8-dissociated protein 1, C-terminal part OS=Emericella nidulans (strain FGSC A4 / ATCC 38163 / CBS 112.46 / NRRL 194 / M139) GN=candA-C PE=1 SV=1	22.2663	23.7194	24.6081	23.3738	26.8028	27.0334	27.4351	26.8876	26.7653	26.7286	26.906	26.5221	26.0216	26.1318	26.2007	26.0743	Cluster -2	3	8	134.69	0	10.317	5.78689	3.27826e-06
Pg_S1865.29	translocon-associated protein beta (TRAPB) family protein	AT5G14030.1	unknown	AT5G14030.1 | Symbols: | translocon-associated protein beta (TRAPB) family protein | chr5:4526878-4528253 FORWARD LENGTH=195	unknown	25.1674	24.8769	25.4479	24.1859	26.1596	26.1629	26.0925	26.2307	25.8659	25.8356	26.2654	26.4148	25.7594	25.8257	25.8587	25.7217	Cluster -2	4	24.9	23.306	0	13.042	3.44019	0.000514925
Pg_S4268.1	GTP cyclohydrolase II	AT5G64300.1	Q32GQ6	AT5G64300.1 | Symbols: ATGCH, GCH, ATRIBA1, RFD1 | GTP cyclohydrolase II | chr5:25718459-25720790 FORWARD LENGTH=543	GTP cyclohydrolase-2 OS=Shigella dysenteriae serotype 1 (strain Sd197) GN=ribA PE=3 SV=1	23.6336	23.3464	24.9087	23.6973	26.7225	27.0331	26.8436	26.6269	25.879	26.0577	26.2104	25.9515	25.7757	25.7329	25.9054	25.7639	Cluster -2	8	24.5	59.824	0	28.535	6.10379	1.65974e-06
Pg_S3621.4	ethylene-forming enzyme	AT1G05010.1	Q945B5	AT1G05010.1 | Symbols: EFE, ACO4, EAT1 | ethylene-forming enzyme | chr1:1431419-1432695 REVERSE LENGTH=323	2-oxoglutarate-dependent dioxygenase AOP2 OS=Arabidopsis thaliana GN=AOP2 PE=2 SV=1	23.796	23.9654	25.0279	23.863	29.2913	29.3272	29.3094	29.2114	27.7932	27.4417	27.8286	27.7701	27.1379	27.2179	27.2043	27.1363	Cluster -2	5	51.3	35.017	0	67.132	9.73633	9.41641e-10
Pg_S8512.4	ubiquitin 6	AT2G47110.1	Q5F3Z7	AT2G47110.1 | Symbols: UBQ6 | ubiquitin 6 | chr2:19344701-19345174 FORWARD LENGTH=157	CTD small phosphatase-like protein 2 OS=Gallus gallus GN=CTDSPL2 PE=2 SV=2	28.7385	28.6212	28.7647	28.7729	29.7859	29.8558	29.9231	29.6219	29.445	29.4929	29.63	29.4392	29.4494	29.4009	29.4266	29.4026	Cluster -2	3	44.9	17.701	0	74.255	8.26164	1.80659e-08
Pg_S7668.1	Tubulin/FtsZ family protein	AT4G14960.2	P28551	AT4G14960.2 | Symbols: TUA6 | Tubulin/FtsZ family protein | chr4:8548769-8550319 REVERSE LENGTH=450	Tubulin beta chain (Fragment) OS=Glycine max GN=TUBB PE=1 SV=2	25.16	25.2413	25.1154	24.9717	26.5216	26.4399	26.4395	26.4626	26.331	26.0613	26.433	26.0949	25.7637	25.6584	25.7133	25.724	Cluster -2	3	24.4	51.129	0	47.613	8.41268	1.33687e-08
Pg_S7440.2	starch branching enzyme 2.1	AT2G36390.1	Q81K82	AT2G36390.1 | Symbols: SBE2.1, BE3 | starch branching enzyme 2.1 | chr2:15264283-15269940 FORWARD LENGTH=858	1,4-alpha-glucan branching enzyme GlgB OS=Bacillus anthracis GN=glgB PE=3 SV=1	25.4196	26.8064	25.854	25.1094	29.0762	29.129	29.0924	29.1557	28.1796	28.2195	28.2396	28.2197	27.4447	27.5331	27.348	27.4582	Cluster -2	5	34.2	99.642	0	177.19	6.65253	5.23251e-07
Pg_S5093.4	purine biosynthesis 4	AT1G74260.1	Q9CFE7	AT1G74260.1 | Symbols: PUR4 | purine biosynthesis 4 | chr1:27923005-27927764 REVERSE LENGTH=1407	Phosphoribosylformylglycinamidine synthase subunit PurQ OS=Lactococcus lactis subsp. lactis (strain IL1403) GN=purQ PE=3 SV=1	25.0163	25.6486	25.3569	26.0228	28.2897	28.3569	28.3069	27.9896	27.3179	27.0142	27.4189	26.8935	26.7984	26.5892	26.4709	26.483	Cluster -2	16	17.8	154.72	0	48.598	7.14755	1.84291e-07
Pg_S1703.25	alpha/beta-Hydrolases superfamily protein	AT4G16820.1	Q9P979	AT4G16820.1 | Symbols: PLA-I{beta]2 | alpha/beta-Hydrolases superfamily protein | chr4:9467563-9469116 FORWARD LENGTH=517	Feruloyl esterase A OS=Aspergillus awamori GN=faeA PE=1 SV=3	24.3223	24.7765	23.9217	23.8926	27.8962	27.7425	27.8007	28.035	26.7868	26.7163	26.7688	26.9	26.0888	26.2105	26.1288	26.5132	Cluster -2	4	45.6	23.657	0	33.776	9.23691	2.53828e-09
Pg_S0061.44	nodulin-related protein 1	AT2G03440.1	unknown	AT2G03440.1 | Symbols: NRP1, ATNRP1 | nodulin-related protein 1 | chr2:1039409-1039972 REVERSE LENGTH=187	unknown	23.6975	24.2402	24.2144	24.8213	28.7486	28.5445	28.7021	28.6784	26.498	26.4632	27.1392	27.1367	26.2121	26.4494	26.2657	26.0842	Cluster -2	5	71.5	14.296	0	37.451	8.83146	5.65807e-09
Pg_S2428.20	high mobility group A	AT1G14900.1	unknown	AT1G14900.1 | Symbols: HMGA | high mobility group A | chr1:5138665-5139353 REVERSE LENGTH=204	unknown	21.2921	24.1497	23.5301	23.6254	30.3164	30.3508	30.2347	30.3377	27.8318	27.8166	27.8892	27.8479	26.5919	26.6629	26.3908	26.5159	Cluster -2	7	61.6	18.877	0	90.838	7.7021	5.75222e-08
Pg_S7262.6	S-adenosyl-L-methionine-dependent methyltransferases superfamily protein	AT1G73600.2	Q6ZIK0	AT1G73600.2 | Symbols: | S-adenosyl-L-methionine-dependent methyltransferases superfamily protein | chr1:27669224-27673400 FORWARD LENGTH=504	Probable tocopherol O-methyltransferase, chloroplastic OS=Oryza sativa subsp. japonica GN=VTE4 PE=2 SV=1	25.9953	26.7657	25.5325	22.509	28.3787	28.3356	28.517	28.2916	26.9681	27.0376	27.0831	27.4071	26.5986	26.7494	26.7764	26.4719	Cluster -2	7	43.1	38.695	0	70.457	2.42392	0.00479504
Pg_S6236.8	rotamase CYP 4	AT3G62030.2	Q9C566	AT3G62030.2 | Symbols: ROC4 | rotamase CYP 4 | chr3:22973004-22975139 FORWARD LENGTH=313	Peptidyl-prolyl cis-trans isomerase CYP40 OS=Arabidopsis thaliana GN=CYP40 PE=2 SV=1	24.4603	26.7574	26.7242	23.669	30.1426	30.508	30.1164	30.5891	28.6989	28.7263	28.7102	28.64	28.86	28.8878	28.8027	28.8492	Cluster -2	2	19.6	33.879	0	68.69	4.90742	2.14082e-05
Pg_S3339.14	carbamoyl phosphate synthetase B	AT1G29900.1	O93937	AT1G29900.1 | Symbols: CARB | carbamoyl phosphate synthetase B | chr1:10468164-10471976 FORWARD LENGTH=1187	Protein pyrABCN OS=Emericella nidulans (strain FGSC A4 / ATCC 38163 / CBS 112.46 / NRRL 194 / M139) GN=pyrABCN PE=3 SV=2	24.201	27.4443	26.6934	23.3187	28.2677	28.2644	27.983	28.3092	27.7401	27.6686	27.6324	27.6085	27.3926	27.2083	27.1964	27.2407	Cluster -2	13	20.8	131.46	0	81.986	2.01374	0.0116634
Pg_S2152.3	ribosomal protein 1	AT1G43170.1	Q97BX7	AT1G43170.1 | Symbols: ARP1, emb2207, RPL3A, RP1 | ribosomal protein 1 | chr1:16266992-16268631 FORWARD LENGTH=389	50S ribosomal protein L3 OS=Thermoplasma volcanium (strain ATCC 51530 / DSM 4299 / JCM 9571 / NBRC 15438 / GSS1) GN=rpl3 PE=3 SV=1	24.3103	25.619	25.4199	24.09	27.3218	27.3479	27.264	27.7365	26.6362	26.5894	26.5879	26.4287	26.7574	27.0293	27.0636	26.9568	Cluster -2	2	40.1	44.57	0	8.2623	5.11374	1.37737e-05
Pg_S1680.6	ARM repeat superfamily protein	AT2G45720.1	Q59MN0	AT2G45720.1 | Symbols: | ARM repeat superfamily protein | chr2:18834468-18836129 FORWARD LENGTH=553	Vacuolar protein 8 OS=Candida albicans (strain SC5314 / ATCC MYA-2876) GN=VAC8 PE=3 SV=3	22.9173	24.5707	23.5807	21.5493	25.6129	25.912	25.487	25.5199	25.3095	23.7688	25.0494	24.2759	25.5201	25.4798	25.5713	25.5069	Cluster -2	6	15.5	51.494	0	16	2.81913	0.00200687
Pg_S1882.1	Transducin family protein / WD-40 repeat family protein	AT4G33270.1	Q5IS43	AT4G33270.1 | Symbols: CDC20.1 | Transducin family protein / WD-40 repeat family protein | chr4:16044545-16046590 REVERSE LENGTH=457	Platelet-activating factor acetylhydrolase IB subunit alpha OS=Pan troglodytes GN=PAFAH1B1 PE=2 SV=3	23.6261	25.7823	25.8249	23.7679	26.1258	26.25	26.096	26.034	25.6526	25.4665	24.6076	25.4332	25.7504	26.0851	26.0468	25.9321	Cluster -2	6	20	54.477	0	29.186	1.36849	0.0477208
Pg_S1163.3	L-Aspartase-like family protein	AT1G36280.1	Q05911	AT1G36280.1 | Symbols: | L-Aspartase-like family protein | chr1:13640600-13642908 FORWARD LENGTH=527	Adenylosuccinate lyase OS=Saccharomyces cerevisiae (strain ATCC 204508 / S288c) GN=ADE13 PE=1 SV=1	22.9337	25.5353	24.8214	23.8792	26.235	26.1911	26.1748	26.2129	25.542	25.4543	25.5655	25.5382	25.2805	25.0851	25.2213	25.3628	Cluster -2	7	19.6	58.869	0	24.654	2.41582	0.00487665
Pg_S1858.24	branched-chain aminotransferase 3	AT3G49680.1	Q56693	AT3G49680.1 | Symbols: ATBCAT-3, BCAT3 | branched-chain aminotransferase 3 | chr3:18422768-18425473 FORWARD LENGTH=413	Aminodeoxychorismate lyase OS=Vibrio harveyi GN=pabC PE=3 SV=1	23.9532	26.398	26.4141	25.3435	27.4406	27.6195	27.4805	27.5505	26.2555	26.2728	26.3738	26.3192	26.3571	26.6359	26.5709	26.7632	Cluster -2	3	23.2	44.16	0	38.995	2.42907	0.00475307
Pg_S3422.2	alpha/beta-Hydrolases superfamily protein	AT4G16820.1	Q9P979	AT4G16820.1 | Symbols: PLA-I{beta]2 | alpha/beta-Hydrolases superfamily protein | chr4:9467563-9469116 FORWARD LENGTH=517	Feruloyl esterase A OS=Aspergillus awamori GN=faeA PE=1 SV=3	23.6197	23.8106	24.5581	24.1523	25.3085	23.8188	25.2588	25.2575	25.3667	25.4799	25.4432	25.4856	25.338	25.4168	25.7505	25.3832	Cluster -2	4	9.3	76.194	0	13.177	2.81602	0.00202035
Pg_S0077.9	O-methyltransferase family protein	AT4G35160.1	Q0IP69	AT4G35160.1 | Symbols: | O-methyltransferase family protein | chr4:16730989-16732808 REVERSE LENGTH=382	Naringenin 7-O-methyltransferase OS=Oryza sativa subsp. japonica GN=Os12g0240900 PE=1 SV=2	23.9719	24.0887	24.186	25.1752	26.6994	23.6309	27.8638	26.3203	26.5979	27.2229	26.6355	26.7213	25.9238	25.9485	25.9644	26.0504	Cluster -2	3	19.6	42.418	0.00024863	3.9164	1.68435	0.0238969
Pg_S0662.3	Eukaryotic aspartyl protease family protein	AT1G25510.1	Q0IU52	AT1G25510.1 | Symbols: | Eukaryotic aspartyl protease family protein | chr1:8959372-8960823 REVERSE LENGTH=483	Aspartic proteinase Asp1 OS=Oryza sativa subsp. japonica GN=ASP1 PE=2 SV=1	23.4165	23.3047	23.8572	23.6307	26.793	22.6764	26.7159	27.0148	25.9884	26.0518	25.9861	26.0616	26.8881	26.9947	26.941	26.6935	Cluster -2	4	10	39.927	0	8.5586	2.31165	0.00612606
Pg_S5057.13	Coatomer epsilon subunit	AT1G30630.1	O62246	AT1G30630.1 | Symbols: | Coatomer epsilon subunit | chr1:10858546-10860173 REVERSE LENGTH=292	Coatomer subunit epsilon OS=Caenorhabditis elegans GN=cope-1 PE=3 SV=1	26.3616	24.0413	26.6204	25.4955	26.2363	26.2928	26.3659	26.36	26.3607	26.3542	26.4762	26.3113	27.248	27.2592	27.1985	27.3139	Cluster -2	7	45.7	32.131	0	28.731	1.80728	0.0182905
Pg_S2817.7	ADP/ATP carrier 2	AT5G13490.1	Q91XD8	AT5G13490.1 | Symbols: AAC2 | ADP/ATP carrier 2 | chr5:4336034-4337379 FORWARD LENGTH=385	Solute carrier family 25 member 38 OS=Mus musculus GN=Slc25a38 PE=2 SV=1	26.9643	24.4459	28.0378	24.1337	28.2134	28.2283	28.3912	28.5001	28.2834	28.3573	28.2984	28.2548	28.3642	28.3985	28.427	28.2649	Cluster -2	3	52.4	42.133	0	19.903	2.12651	0.00916389
Pg_S6258.1	Zn-dependent exopeptidases superfamily protein	AT5G60160.1	Q9WYJ9	AT5G60160.1 | Symbols: | Zn-dependent exopeptidases superfamily protein | chr5:24223887-24226783 REVERSE LENGTH=477	Probable M18 family aminopeptidase 1 OS=Thermotoga maritima (strain ATCC 43589 / MSB8 / DSM 3109 / JCM 10099) GN=apeA PE=1 SV=2	24.9822	23.3457	24.8689	24.0501	25.0318	25.0825	25.1572	25.0327	25.1875	25.0448	25.1301	24.8916	24.993	25.129	25.2	24.9921	Cluster -2	6	10.7	100.3	0	22.449	1.38348	0.0461899
Pg_S0263.1	purin-rich alpha 1	AT2G32080.1	P42669	AT2G32080.1 | Symbols: PUR ALPHA-1 | purin-rich alpha 1 | chr2:13642716-13644036 REVERSE LENGTH=296	Transcriptional activator protein Pur-alpha OS=Mus musculus GN=Pura PE=1 SV=1	25.9308	23.6228	26.1193	23.63	25.5757	25.6956	25.6845	25.9181	25.8818	25.7118	25.8737	25.8891	26.6505	26.5596	26.6779	26.5493	Cluster -2	7	25.1	31.771	0	21.457	1.57091	0.0307599
Pg_S2566.4	methylenetetrahydrofolate reductase 2	AT2G44160.1	Q8KA62	AT2G44160.1 | Symbols: MTHFR2 | methylenetetrahydrofolate reductase 2 | chr2:18262301-18265185 FORWARD LENGTH=594	5,10-methylenetetrahydrofolate reductase OS=Buchnera aphidicola subsp. Schizaphis graminum (strain Sg) GN=metF PE=3 SV=1	24.9936	22.8038	25.5899	23.433	26.6824	26.6281	26.6503	26.6853	26.0606	26.171	26.1028	26.3874	27.3034	27.3093	27.3982	27.4496	Cluster -2	5	63	67.089	0	39.489	3.89598	0.000192728
Pg_S7148.1	Pectinacetylesterase family protein	AT3G05910.1	Q6P988	AT3G05910.1 | Symbols: | Pectinacetylesterase family protein | chr3:1764509-1767240 REVERSE LENGTH=415	Protein notum homolog OS=Homo sapiens GN=NOTUM PE=2 SV=2	26.0543	24.158	25.7176	24.0916	26.1415	26.5205	26.4758	26.1409	26.5078	26.4243	26.6227	26.3694	27.7836	28.0133	27.9929	27.8332	Cluster -2	6	32.6	42.965	0	47.743	4.24327	9.06155e-05
Pg_S6181.5	villin 2	AT2G41740.1	P19657	AT2G41740.1 | Symbols: VLN2, ATVLN2 | villin 2 | chr2:17410962-17416878 REVERSE LENGTH=976	Plasma membrane ATPase 2 OS=Saccharomyces cerevisiae (strain ATCC 204508 / S288c) GN=PMA2 PE=1 SV=3	23.7988	23.3141	24.7924	22.8078	25.4175	25.2167	25.1802	25.9576	25.0028	25.1407	25.9699	24.8109	27.2273	27.3932	27.3062	27.3846	Cluster -2	4	43.4	104.08	0	38.634	5.29518	9.32379e-06
Pg_S5440.8	NAD(P)-binding Rossmann-fold superfamily protein	AT1G30620.1	Q31FG4	AT1G30620.1 | Symbols: HSR8, MUR4, UXE1 | NAD(P)-binding Rossmann-fold superfamily protein | chr1:10855496-10857970 FORWARD LENGTH=419	ADP-L-glycero-D-manno-heptose-6-epimerase OS=Thiomicrospira crunogena (strain XCL-2) GN=hldD PE=3 SV=1	26.9607	26.7005	27.6022	26.6674	27.9437	28.0661	27.9156	27.8842	27.6678	27.8641	27.7182	27.5649	28.1832	28.2966	28.1911	28.2141	Cluster -2	1	41.1	44.041	0	64.17	4.37357	6.80601e-05
Pg_S3048.11	ribophorin II (RPN2) family protein	AT4G21150.1	Q9DBG6	AT4G21150.1 | Symbols: HAP6 | ribophorin II (RPN2) family protein | chr4:11278646-11283599 FORWARD LENGTH=691	Dolichyl-diphosphooligosaccharide--protein glycosyltransferase subunit 2 OS=Mus musculus GN=Rpn2 PE=2 SV=1	28.9064	28.6536	29.3124	28.6366	29.1419	29.0434	28.9972	29.1409	29.163	29.1856	29.0209	28.9554	29.4075	29.5913	29.6349	29.5934	Cluster -2	4	39.8	82.67	0	126.82	2.93815	0.00154846
Pg_S2256.10	eukaryotic translation initiation factor 2	AT2G39990.1	Q75F44	AT2G39990.1 | Symbols: EIF2, AteIF3f, eIF3F | eukaryotic translation initiation factor 2 | chr2:16698332-16699929 REVERSE LENGTH=293	26S proteasome regulatory subunit RPN8 OS=Ashbya gossypii (strain ATCC 10895 / CBS 109.51 / FGSC 9923 / NRRL Y-1056) GN=RPN8 PE=3 SV=1	26.447	26.1527	26.7465	25.8283	26.907	26.8658	27.0733	27.0911	26.859	26.773	26.7502	26.7365	27.1394	27.1606	27.4131	27.3868	Cluster -2	4	32.6	36.973	0	26.242	3.52776	0.000427114
Pg_S2113.15	ARM repeat superfamily protein	AT2G45720.1	Q59MN0	AT2G45720.1 | Symbols: | ARM repeat superfamily protein | chr2:18834468-18836129 FORWARD LENGTH=553	Vacuolar protein 8 OS=Candida albicans (strain SC5314 / ATCC MYA-2876) GN=VAC8 PE=3 SV=3	22.7611	23.8552	25.4951	23.0257	25.4998	25.6033	25.6645	25.3436	25.9011	25.9333	25.598	25.6162	26.5272	26.7532	26.6481	26.5982	Cluster -2	7	12.2	129.27	0	41.959	3.55823	0.000400162
Pg_S1650.13	26S proteasome, regulatory subunit Rpn7;Proteasome component (PCI) domain	AT4G24820.1	Q6NRT5	AT4G24820.1 | Symbols: | 26S proteasome, regulatory subunit Rpn7;Proteasome component (PCI) domain | chr4:12790471-12792599 REVERSE LENGTH=387	COP9 signalosome complex subunit 1 OS=Xenopus laevis GN=csn1 PE=2 SV=1	23.9331	23.3618	24.7859	23.1157	25.6991	25.8472	25.7482	23.077	25.4436	25.0918	25.223	25.2494	25.9866	26.0947	26.2088	26.0579	Cluster -2	4	21.2	44.091	0	43.977	2.0087	0.0117896
Pg_S0654.5	clathrin adaptor complexes medium subunit family protein	AT5G05010.1	P43621	AT5G05010.1 | Symbols: | clathrin adaptor complexes medium subunit family protein | chr5:1477137-1479872 FORWARD LENGTH=527	Coatomer subunit delta OS=Saccharomyces cerevisiae (strain ATCC 204508 / S288c) GN=RET2 PE=1 SV=3	23.3379	23.6229	26.2093	23.4046	25.0425	24.9771	25.4832	23.1621	25.5779	25.5853	25.6409	25.0421	26.2298	26.2897	26.4421	26.252	Cluster -2	5	13.9	48.637	0	22.164	1.65759	0.0253349
Pg_S6262.1	U1 small nuclear ribonucleoprotein-70K	AT3G50670.1	Q9CWZ3	AT3G50670.1 | Symbols: U1-70K, U1SNRNP | U1 small nuclear ribonucleoprotein-70K | chr3:18826476-18829492 REVERSE LENGTH=427	RNA-binding protein 8A OS=Mus musculus GN=Rbm8a PE=1 SV=3	23.9181	25.8457	26.0059	22.9655	26.482	26.4134	26.5725	26.628	26.3538	25.4345	26.0432	25.7029	27.7129	27.3583	27.4006	27.4914	Cluster -2	6	15.8	59.887	0	18.699	2.7121	0.00253527
Pg_S5853.14	UDP-xylose synthase 4	AT2G47650.2	Q6DF08	AT2G47650.2 | Symbols: UXS4 | UDP-xylose synthase 4 | chr2:19538751-19541364 REVERSE LENGTH=449	UDP-glucuronic acid decarboxylase 1 OS=Xenopus tropicalis GN=uxs1 PE=2 SV=1	22.498	23.6145	24.7672	24.3123	25.982	26.5451	26.0109	26.6065	24.9725	24.9696	25.0151	24.9097	26.5003	26.9731	26.5072	26.9811	Cluster -2	2	33.1	41.594	0	33.563	4.66693	3.61077e-05
Pg_S2498.9	Acyl-CoA thioesterase family protein	AT1G01710.1	P41903	AT1G01710.1 | Symbols: | Acyl-CoA thioesterase family protein | chr1:262950-266029 FORWARD LENGTH=427	Peroxisomal acyl-coenzyme A thioester hydrolase 1 OS=Saccharomyces cerevisiae (strain ATCC 204508 / S288c) GN=TES1 PE=1 SV=1	23.2869	23.309	24.916	24.1553	24.9689	24.9275	24.9026	24.9566	24.7999	24.8279	24.551	24.677	24.8665	25.0894	24.8517	25.1086	Cluster -2	4	11.5	61.801	0	16.117	2.03022	0.0112618
Pg_S1356.4	vesicle-associated membrane protein 713	AT5G11150.1	O70404	AT5G11150.1 | Symbols: ATVAMP713, VAMP713 | vesicle-associated membrane protein 713 | chr5:3546625-3547844 REVERSE LENGTH=221	Vesicle-associated membrane protein 8 OS=Mus musculus GN=Vamp8 PE=1 SV=1	23.9623	23.7653	26.0967	26.2914	25.7898	26.0655	26.1674	26.4028	25.7074	25.8364	25.7381	25.7551	27.1174	27.0386	26.9461	26.9195	Cluster -2	8	34.7	25.169	0	31.945	1.92994	0.0139943
Pg_S0096.9	4-coumarate:CoA ligase 2	AT3G21240.1	Q2YTP0	AT3G21240.1 | Symbols: 4CL2, AT4CL2 | 4-coumarate:CoA ligase 2 | chr3:7454497-7457314 REVERSE LENGTH=556	2-succinylbenzoate--CoA ligase OS=Staphylococcus aureus (strain bovine RF122 / ET3-1) GN=menE PE=3 SV=1	23.3095	23.3129	27.0181	24.8886	27.0771	27.0182	27.0138	27.076	27.4217	27.2637	27.3129	27.1278	28.4194	28.4253	28.3471	28.3933	Cluster -2	5	28.1	102.19	0	58.379	3.34617	0.000634996
Pg_S0103.1	NAD(P)-binding Rossmann-fold superfamily protein	AT1G30620.1	Q31FG4	AT1G30620.1 | Symbols: HSR8, MUR4, UXE1 | NAD(P)-binding Rossmann-fold superfamily protein | chr1:10855496-10857970 FORWARD LENGTH=419	ADP-L-glycero-D-manno-heptose-6-epimerase OS=Thiomicrospira crunogena (strain XCL-2) GN=hldD PE=3 SV=1	24.7598	25.8787	26.5185	26.3865	26.8002	26.8526	26.8304	26.7294	26.5097	26.7546	26.8906	26.8934	27.0965	27.0907	27.1327	27.1806	Cluster -2	2	25.8	43.977	0	51.352	2.17222	0.00832604
Pg_S6024.3	eukaryotic translation initiation factor 3A	AT4G11420.1	Q9XHR2	AT4G11420.1 | Symbols: EIF3A, ATEIF3A-1, EIF3A-1, ATTIF3A1, TIF3A1 | eukaryotic translation initiation factor 3A | chr4:6947834-6952053 REVERSE LENGTH=987	Eukaryotic translation initiation factor 3 subunit A OS=Zea mays GN=TIF3A1 PE=2 SV=1	23.7056	22.4197	24.439	23.7191	27.1885	27.0596	27.2142	27.1531	26.2522	26.218	26.5923	26.1868	26.7242	26.8738	26.8476	26.7701	Cluster -2	3	19.1	94.452	0	80.753	6.6269	5.53265e-07
Pg_S6414.5	phospholipid:diacylglycerol acyltransferase	AT5G13640.1	Q8WMP9	AT5G13640.1 | Symbols: ATPDAT, PDAT, PDAT1 | phospholipid:diacylglycerol acyltransferase | chr5:4393529-4397213 FORWARD LENGTH=671	Group XV phospholipase A2 OS=Bos taurus GN=PLA2G15 PE=1 SV=1	24.0286	23.3008	24.5743	24.4451	25.9084	25.6503	25.8845	25.4133	25.3209	25.0483	25.1694	25.4264	25.5748	26.256	25.8565	25.3962	Cluster -2	1	17.4	66.451	0	16.704	3.9782	0.000161176
Pg_S5269.3	Actin-like ATPase superfamily protein	AT1G30540.1	Q54PM7	AT1G30540.1 | Symbols: | Actin-like ATPase superfamily protein | chr1:10816951-10819172 REVERSE LENGTH=351	N-acetyl-D-glucosamine kinase OS=Dictyostelium discoideum GN=nagk PE=3 SV=2	23.8866	22.709	23.6207	24.3886	25.6837	26.1337	25.4243	25.7666	24.8619	24.8651	24.9228	25.1153	25.3363	25.2929	25.5581	25.2746	Cluster -2	5	20.2	38.688	0	12.769	4.4157	6.21833e-05
Pg_S2672.19	acetyl Co-enzyme a carboxylase carboxyltransferase alpha subunit	AT2G38040.1	Q41008	AT2G38040.1 | Symbols: CAC3 | acetyl Co-enzyme a carboxylase carboxyltransferase alpha subunit | chr2:15917612-15920749 FORWARD LENGTH=769	Acetyl-coenzyme A carboxylase carboxyl transferase subunit alpha, chloroplastic OS=Pisum sativum GN=ACCA PE=1 SV=1	24.6075	22.1373	26.5777	26.6283	27.567	27.6857	27.7028	27.676	27.1606	27.1663	27.3801	27.06	27.4295	27.444	27.5051	27.5151	Cluster -2	14	28.3	83.733	0	45.906	1.87287	0.0158618
Pg_S2003.3	unknown	unknown	unknown	unknown	unknown	24.509	23.0276	26.2634	25.7137	27.4921	27.4834	27.3634	27.1221	26.8633	26.8234	26.7718	26.8119	27.7609	27.8216	27.8269	27.7703	Cluster -2	6	54.3	65.754	0	33.32	3.30345	0.000695827
Pg_S1306.14	pfkB-like carbohydrate kinase family protein	AT5G58730.1	unknown	AT5G58730.1 | Symbols: | pfkB-like carbohydrate kinase family protein | chr5:23723627-23725324 REVERSE LENGTH=353	unknown	26.2686	22.4016	26.0807	26.1842	27.6722	27.3957	27.5606	27.5769	27.1637	27.0142	27.1694	27.2197	26.803	26.767	27.0507	26.7812	Cluster -2	7	35.5	49.455	0	48.916	1.62925	0.0269787
Pg_S1442.4	golgin candidate 6	AT3G27530.1	B0F9L4	AT3G27530.1 | Symbols: GC6, MAG4 | golgin candidate 6 | chr3:10193778-10199659 REVERSE LENGTH=914	Golgin candidate 6 OS=Arabidopsis thaliana GN=GC6 PE=1 SV=2	23.9291	23.4909	24.4321	25.02	25.6223	25.5638	25.5367	25.6166	24.8271	25.1919	25.2643	25.2107	25.8857	25.8608	25.7955	25.4922	Cluster -2	2	9	105.36	0	13.257	3.63189	0.000341324
Pg_S6184.5	valyl-tRNA synthetase / valine--tRNA ligase (VALRS)	AT1G14610.1	Q9CBY7	AT1G14610.1 | Symbols: TWN2, VALRS | valyl-tRNA synthetase / valine--tRNA ligase (VALRS) | chr1:5008502-5014486 REVERSE LENGTH=1108	Valine--tRNA ligase OS=Mycobacterium leprae (strain TN) GN=valS PE=3 SV=1	23.4036	23.0749	26.5394	24.2876	26.3728	26.0927	26.4858	26.021	25.9176	25.9296	25.9874	26.0434	25.9447	26.4141	24.6406	26.0633	Cluster -2	3	13.7	111.22	0	32.122	1.39564	0.0450014
Pg_S2476.3	gamma-glutamyl hydrolase 2	AT1G78680.1	A7YWG4	AT1G78680.1 | Symbols: ATGGH2, GGH2 | gamma-glutamyl hydrolase 2 | chr1:29593933-29596037 FORWARD LENGTH=347	Gamma-glutamyl hydrolase OS=Bos taurus GN=GGH PE=2 SV=1	24.0574	23.9436	25.5798	24.1261	27.0505	26.7638	26.4327	26.6291	26.623	26.6479	26.7242	26.6554	26.8022	26.8576	26.6573	26.6679	Cluster -2	4	28.7	38.031	0	37.35	5.19796	1.14949e-05
Pg_S2097.19	20S proteasome alpha subunit C1	AT3G22110.1	P90513	AT3G22110.1 | Symbols: PAC1 | 20S proteasome alpha subunit C1 | chr3:7792819-7793571 REVERSE LENGTH=250	Proteasome subunit alpha type-3 (Fragment) OS=Acanthamoeba castellanii PE=2 SV=1	24.4237	24.4126	26.9534	23.51	26.6172	26.6736	26.489	26.8242	26.6148	26.6006	26.6465	26.5336	26.5126	26.6676	26.6043	26.5394	Cluster -2	3	52.6	31.518	0	13.73	1.94667	0.0134767
Pg_S0204.74	RNA-binding (RRM/RBD/RNP motifs) family protein	AT4G14300.1	Q6GLB5	AT4G14300.1 | Symbols: | RNA-binding (RRM/RBD/RNP motifs) family protein | chr4:8231179-8232785 FORWARD LENGTH=411	ELAV-like protein 1 OS=Xenopus tropicalis GN=elavl1 PE=2 SV=1	22.7304	23.3724	24.6452	22.8453	26.3757	26.4481	26.5269	26.5792	26.2985	26.3605	26.1022	26.3036	26.2689	26.2743	26.2712	26.2598	Cluster -2	1	9.8	53.607	0	13.894	6.02403	1.96286e-06
Pg_S4611.3	unknown	unknown	unknown	unknown	unknown	24.1854	24.0714	25.2605	23.2926	25.9205	25.9706	25.9489	25.9386	25.8035	25.8666	25.7205	25.774	25.5474	25.7368	25.8912	25.8456	Cluster -2	1	60.2	53.672	0	11.896	3.72748	0.000276964
Pg_S8510.3	O-methyltransferase 1	AT5G54160.1	D5AP78	AT5G54160.1 | Symbols: ATOMT1, OMT1 | O-methyltransferase 1 | chr5:21982075-21984167 FORWARD LENGTH=363	Demethylspheroidene O-methyltransferase OS=Rhodobacter capsulatus (strain ATCC BAA-309 / NBRC 16581 / SB1003) GN=crtF PE=1 SV=1	24.9527	25.183	24.4841	23.2818	25.5991	25.825	25.8685	25.4672	25.1114	24.9244	25.3379	25.1861	26.2654	26.1454	26.056	26.1867	Cluster -2	9	37.2	39.578	0	21.852	2.98004	0.00141133
Pg_S7717.6	carbonic anhydrase 2	AT5G14740.1	P9WPJ8	AT5G14740.1 | Symbols: CA2, CA18, BETA CA2 | carbonic anhydrase 2 | chr5:4758257-4762382 FORWARD LENGTH=331	Carbonic anhydrase 2 OS=Mycobacterium tuberculosis (strain CDC 1551 / Oshkosh) GN=mtcA2 PE=3 SV=1	24.9127	24.1468	24.6063	23.4127	25.9333	26.088	26.1	26.0357	26.0176	25.7783	25.9773	25.8495	26.2684	26.1701	26.2138	26.4956	Cluster -2	6	39.8	28.011	0	39.091	5.05539	1.56001e-05
Pg_S4358.1	vacuolar ATP synthase subunit C (VATC) / V-ATPase C subunit / vacuolar proton pump C subunit (DET3)	AT1G12840.1	Q9HDW6	AT1G12840.1 | Symbols: DET3, ATVHA-C | vacuolar ATP synthase subunit C (VATC) / V-ATPase C subunit / vacuolar proton pump C subunit (DET3) | chr1:4375584-4378220 FORWARD LENGTH=375	V-type proton ATPase subunit C OS=Schizosaccharomyces pombe (strain 972 / ATCC 24843) GN=vma5 PE=1 SV=1	25.4134	24.7467	24.0241	23.2854	26.6082	26.4046	26.5333	26.5309	26.2267	26.3693	26.3403	26.2478	27.309	27.4859	27.6309	27.4762	Cluster -2	7	31.6	45.376	0	35.508	5.21886	1.09686e-05
Pg_S3336.13	DHFS-FPGS homolog B	AT5G05980.1	P57265	AT5G05980.1 | Symbols: ATDFB, DFB, FPGS1 | DHFS-FPGS homolog B | chr5:1799738-1804441 REVERSE LENGTH=571	Bifunctional protein FolC OS=Buchnera aphidicola subsp. Acyrthosiphon pisum (strain APS) GN=folC PE=3 SV=1	23.9837	23.696	23.7869	22.1767	25.5392	25.6498	25.3535	25.7159	25.8435	25.731	25.8521	25.7838	25.8309	26.0244	25.6939	25.764	Cluster -2	3	42.4	60.449	0	12.333	5.08858	1.45051e-05
Pg_S3153.5	myosin heavy chain-related	AT4G31340.1	unknown	AT4G31340.1 | Symbols: | myosin heavy chain-related | chr4:15205662-15208950 FORWARD LENGTH=437	unknown	25.8787	23.69	24.3819	23.4175	25.9443	25.548	26.0005	26.2768	26.5982	25.9659	25.9678	25.9316	26.0602	26.1404	26.0328	26.0388	Cluster -2	5	14.2	52.769	0	9.7398	2.52199	0.00385972
Pg_S1497.29	TCP-1/cpn60 chaperonin family protein	AT3G18190.1	Q6NF74	AT3G18190.1 | Symbols: | TCP-1/cpn60 chaperonin family protein | chr3:6232226-6233836 FORWARD LENGTH=536	60 kDa chaperonin 2 OS=Corynebacterium diphtheriae (strain ATCC 700971 / NCTC 13129 / Biotype gravis) GN=groL2 PE=3 SV=1	25.2459	23.66	23.9303	23.3737	25.2839	25.3547	25.1564	25.2935	24.6698	25.1163	24.8046	25.1134	25.4342	25.3011	25.2218	25.5839	Cluster -2	6	55.3	59.105	0	24.448	2.382	0.0052486
Pg_S1338.22	Rhodanese/Cell cycle control phosphatase superfamily protein	AT1G17850.2	Q1QPC1	AT1G17850.2 | Symbols: | Rhodanese/Cell cycle control phosphatase superfamily protein | chr1:6146470-6148820 REVERSE LENGTH=448	UPF0176 protein Nham_1078 OS=Nitrobacter hamburgensis (strain X14 / DSM 10229) GN=Nham_1078 PE=3 SV=1	26.1678	26.1743	24.9685	23.9126	26.6091	26.3603	26.3525	26.48	26.534	26.9017	26.6063	26.6119	26.9604	26.8804	27.0068	27.1431	Cluster -2	4	19.6	40.847	0	21.31	2.24436	0.00711251
Pg_S1069.17	Transducin/WD40 repeat-like superfamily protein	AT3G53390.1	Q8BHD1	AT3G53390.1 | Symbols: | Transducin/WD40 repeat-like superfamily protein | chr3:19792781-19796428 FORWARD LENGTH=558	POC1 centriolar protein homolog B OS=Mus musculus GN=Poc1b PE=2 SV=1	27.1809	26.8236	25.9573	24.2859	26.9589	27.0654	26.9009	26.6403	26.9719	27.0231	26.9726	27.2152	27.7967	27.7721	27.8017	27.8421	Cluster -2	19	19.2	171.73	0	88.257	1.68415	0.0238986
Pg_S5838.2	S-adenosyl-l-homocysteine (SAH) hydrolase 2	AT3G23810.1	P26799	AT3G23810.1 | Symbols: SAHH2, ATSAHH2 | S-adenosyl-l-homocysteine (SAH) hydrolase 2 | chr3:8588013-8589671 REVERSE LENGTH=485	Adenosylhomocysteinase (Fragment) OS=Streptomyces fradiae GN=ahcY PE=3 SV=1	26.2679	26.9827	26.3261	24.0135	26.6815	26.9454	26.8125	26.9754	27.7872	27.7586	27.7596	27.8675	28.153	28.34	28.1991	28.1839	Cluster -2	6	58.1	53.3	0	50.799	2.85781	0.00184007
Pg_S0762.41	SH3 domain-containing protein	AT2G07360.2	Q9UR35	AT2G07360.2 | Symbols: | SH3 domain-containing protein | chr2:3047623-3057099 REVERSE LENGTH=1198	NADH-cytochrome b5 reductase 1 OS=Mortierella alpina GN=CBR1 PE=2 SV=1	25.8773	23.257	23.896	23.6502	25.8905	25.5597	25.8815	25.4776	25.4465	25.2269	25.298	25.5043	26.2209	26.1954	26.226	26.3464	Cluster -2	8	11.1	130.66	0	39.229	2.59983	0.00324802
Pg_S5782.11	high mobility group B1	AT3G51880.2	P40628	AT3G51880.2 | Symbols: HMGB1, NFD1 | high mobility group B1 | chr3:19247241-19248491 REVERSE LENGTH=185	High mobility group protein homolog OS=Invertebrate iridescent virus 6 GN=EF1 PE=3 SV=2	25.7665	25.7695	25.7414	23.8123	26.5357	26.479	26.7514	26.491	26.8361	26.6836	26.6742	26.6475	26.3968	26.476	26.6607	26.3511	Cluster -2	2	9.3	17.994	0	11.252	2.26988	0.00672397
Pg_S6384.3	RNA-binding (RRM/RBD/RNP motifs) family protein	AT4G14300.1	Q6GLB5	AT4G14300.1 | Symbols: | RNA-binding (RRM/RBD/RNP motifs) family protein | chr4:8231179-8232785 FORWARD LENGTH=411	ELAV-like protein 1 OS=Xenopus tropicalis GN=elavl1 PE=2 SV=1	25.8852	26.0822	23.7759	23.934	26.3128	26.24	26.4573	26.1048	25.9552	25.9835	25.9979	26.0161	26.4231	26.7053	26.539	26.612	Cluster -2	3	12.8	36.086	0	9.3507	1.83848	0.0170919
Pg_S6179.1	RNA polymerase I-associated factor PAF67	AT5G25757.1	B4PG99	AT5G25757.1 | Symbols: | RNA polymerase I-associated factor PAF67 | chr5:8965515-8967460 REVERSE LENGTH=514	Eukaryotic translation initiation factor 3 subunit L OS=Drosophila yakuba GN=GE20146 PE=3 SV=1	24.2205	24.7691	23.2513	22.7399	25.7272	25.6897	25.733	25.7824	24.8744	24.8148	24.9387	25.1182	25.5461	25.631	25.8038	25.7833	Cluster -2	3	6.4	60.384	0	12.811	3.73609	0.000271669
Pg_S4644.16	oxidoreductases, acting on the aldehyde or oxo group of donors, NAD or NADP as acceptor;copper ion binding	AT2G19940.1	A8AAF8	AT2G19940.1 | Symbols: | oxidoreductases, acting on the aldehyde or oxo group of donors, NAD or NADP as acceptor;copper ion binding | chr2:8613168-8615649 FORWARD LENGTH=401	N-acetyl-gamma-glutamyl-phosphate/N-acetyl-gamma-aminoadipyl-phosphate reductase OS=Ignicoccus hospitalis (strain KIN4/I / DSM 18386 / JCM 14125) GN=argC PE=3 SV=1	26.4339	26.3639	23.7408	23.9639	28.1046	27.7464	27.8567	27.6551	26.6819	26.843	27.2012	27.057	26.9548	26.8208	27.0719	27.0129	Cluster -2	7	26.2	44.045	0	32.881	2.70416	0.0025783
Pg_S2835.3	ENTH/ANTH/VHS superfamily protein	AT4G32285.1	Q9C502	AT4G32285.1 | Symbols: | ENTH/ANTH/VHS superfamily protein | chr4:15586003-15587910 FORWARD LENGTH=635	Putative clathrin assembly protein At1g33340 OS=Arabidopsis thaliana GN=At1g33340 PE=2 SV=1	26.7958	26.4989	23.1044	24.9922	27.7744	27.8939	27.6687	27.7449	26.0217	26.2018	26.0546	26.371	27.7257	27.5388	27.5307	27.1089	Cluster -2	3	6.4	116.94	0	18.8	2.24054	0.00716914
Pg_S0849.28	unknown	unknown	unknown	unknown	unknown	24.6502	26.216	23.4947	24.2397	25.7954	25.8432	26.4455	26.0104	25.6033	25.5909	25.7311	26.1319	26.1446	26.3439	26.1087	26.1576	Cluster -2	5	13.9	78.844	0	7.9633	1.80296	0.0184582
Pg_S1302.31	NAD(P)-binding Rossmann-fold superfamily protein	AT1G30620.1	Q31FG4	AT1G30620.1 | Symbols: HSR8, MUR4, UXE1 | NAD(P)-binding Rossmann-fold superfamily protein | chr1:10855496-10857970 FORWARD LENGTH=419	ADP-L-glycero-D-manno-heptose-6-epimerase OS=Thiomicrospira crunogena (strain XCL-2) GN=hldD PE=3 SV=1	26.4894	26.4569	22.5715	23.271	27.1159	26.4215	26.8303	26.5096	26.7659	26.8969	27.1559	27.1637	26.6986	26.2565	26.995	26.9016	Cluster -2	8	46.6	36.24	0	33.324	1.4599	0.0391301
Pg_S4456.7	ribosomal protein S11-beta	AT5G23740.1	Q9HIR8	AT5G23740.1 | Symbols: RPS11-BETA | ribosomal protein S11-beta | chr5:8008251-8009330 REVERSE LENGTH=159	30S ribosomal protein S17P OS=Thermoplasma acidophilum (strain ATCC 25905 / DSM 1728 / JCM 9062 / NBRC 15155 / AMRC-C165) GN=rps17p PE=3 SV=1	22.6471	27.4129	27.5153	24.0464	27.3843	27.5595	27.6503	27.4525	27.5751	27.5257	27.7693	27.6864	28.5314	28.495	27.9616	28.1141	Cluster -2	6	36	17.848	0	15.574	1.48873	0.0367316
Pg_S2704.10	Nucleotide-diphospho-sugar transferases superfamily protein	AT2G37090.1	Q9CW73	AT2G37090.1 | Symbols: IRX9 | Nucleotide-diphospho-sugar transferases superfamily protein | chr2:15587671-15589223 REVERSE LENGTH=351	Galactosylgalactosylxylosylprotein 3-beta-glucuronosyltransferase 1 OS=Mus musculus GN=B3gat1 PE=2 SV=2	22.296	26.5776	23.4502	23.6072	26.1882	26.0456	26.112	25.9064	26.8092	26.9618	26.3571	26.7131	25.9901	26.1072	26.0632	26.0572	Cluster -2	6	45.2	32.033	0	24.792	2.1568	0.00859379
Pg_S1988.1	lipoxygenase 1	AT1G55020.1	Q8RNT4	AT1G55020.1 | Symbols: LOX1, ATLOX1 | lipoxygenase 1 | chr1:20525798-20530143 FORWARD LENGTH=859	Linoleate 9/13-lipoxygenase OS=Pseudomonas aeruginosa GN=lox PE=1 SV=2	22.813	25.9055	24.5916	25.2305	27.3421	27.4042	27.4133	27.2726	29.3946	28.9762	29.0911	29.046	28.1317	28.2552	28.2822	28.1596	Cluster -2	7	37.7	99.394	0	107.89	5.36715	8.00623e-06
Pg_S0805.6	delta subunit of Mt ATP synthase	AT5G13450.1	Q2G5N8	AT5G13450.1 | Symbols: ATP5 | delta subunit of Mt ATP synthase | chr5:4310558-4311941 REVERSE LENGTH=238	ATP synthase subunit delta OS=Novosphingobium aromaticivorans (strain DSM 12444 / F199) GN=atpH PE=3 SV=2	22.3265	24.0872	24.0716	24.014	24.2762	24.6681	24.554	24.5174	24.6791	25.243	24.8321	24.7472	24.4791	24.3017	24.5982	24.5233	Cluster -2	3	17.5	28.067	0	11.887	1.81147	0.0181295
Pg_S0712.5	ubiquitin-specific protease 12	AT5G06600.1	unknown	AT5G06600.1 | Symbols: UBP12 | ubiquitin-specific protease 12 | chr5:2019545-2027834 REVERSE LENGTH=1116	unknown	22.6427	24.5784	24.0015	23.8707	25.4468	25.5601	25.1277	25.1828	26.0494	26.2722	26.1859	26.0115	26.2606	26.0754	25.7429	25.7149	Cluster -2	4	12.8	130.7	0	13.654	4.5581	4.56159e-05
Pg_S2496.10	developmentally regulated G-protein 1	AT1G17470.1	Q0RPF6	AT1G17470.1 | Symbols: ATDRG1, ATDRG, DRG1 | developmentally regulated G-protein 1 | chr1:6003442-6006155 FORWARD LENGTH=399	GTPase Obg OS=Frankia alni (strain ACN14a) GN=obg PE=3 SV=1	23.7446	25.1981	24.6037	24.2735	26.1578	25.6729	25.8989	25.743	26.1667	26.5035	26.4668	26.4013	26.4343	26.4148	26.6645	26.3898	Cluster -2	6	22.3	44.434	0	24.579	5.17452	1.20793e-05
Pg_S0429.9	non-ATPase subunit 9	AT1G29150.1	Q8W207	AT1G29150.1 | Symbols: ATS9, RPN6 | non-ATPase subunit 9 | chr1:10181240-10182499 FORWARD LENGTH=419	COP9 signalosome complex subunit 2 OS=Arabidopsis thaliana GN=CSN2 PE=1 SV=1	23.8651	26.8846	26.3363	26.5258	27.4066	27.7211	27.6901	27.5953	27.9993	27.8793	27.869	27.6606	27.8172	28.0495	27.9196	27.9672	Cluster -2	1	43	47.248	0	87.945	2.37133	0.00536744
Pg_S7315.2	U2 snRNP auxilliary factor, large subunit, splicing factor	AT1G60900.1	P09651	AT1G60900.1 | Symbols: | U2 snRNP auxilliary factor, large subunit, splicing factor | chr1:22424008-22427806 FORWARD LENGTH=589	Heterogeneous nuclear ribonucleoprotein A1 OS=Homo sapiens GN=HNRNPA1 PE=1 SV=5	23.808	24.9239	24.0323	22.9228	25.9507	25.9903	25.9371	25.9221	25.9885	25.8773	25.9281	25.572	26.0242	26.173	26.2255	26.2701	Cluster -2	5	22.1	59.368	0	20.83	4.63786	3.84448e-05
Pg_S6659.3	Nucleoporin autopeptidase	AT1G10390.1	unknown	AT1G10390.1 | Symbols: | Nucleoporin autopeptidase | chr1:3407265-3412045 REVERSE LENGTH=1041	unknown	23.8992	24.7687	23.0236	23.5673	24.6835	24.5625	24.7945	24.3705	24.9101	24.9593	24.899	25.3197	24.5875	25.1617	24.7224	24.6828	Cluster -2	2	3.2	101.5	0	8.538	2.13912	0.00891668
Pg_S1506.2	N-terminal nucleophile aminohydrolases (Ntn hydrolases) superfamily protein	AT5G08100.1	B4GHE3	AT5G08100.1 | Symbols: | N-terminal nucleophile aminohydrolases (Ntn hydrolases) superfamily protein | chr5:2593242-2594586 REVERSE LENGTH=315	L-asparaginase-like protein GL17509 OS=Drosophila persimilis GN=GL17509 PE=3 SV=1	23.8009	26.7035	24.1315	23.0417	26.0333	26.0646	25.9832	26.5408	26.5767	26.7605	26.871	26.9095	27.449	27.5219	27.5309	27.3302	Cluster -2	4	25.2	31.88	0	9.2082	2.91988	0.00160606
Pg_S1414.22	NADH-ubiquinone oxidoreductase 20 kDa subunit, mitochondrial	AT5G11770.1	Q1IPE7	AT5G11770.1 | Symbols: | NADH-ubiquinone oxidoreductase 20 kDa subunit, mitochondrial | chr5:3791148-3792929 REVERSE LENGTH=218	NADH-quinone oxidoreductase subunit B 1 OS=Koribacter versatilis (strain Ellin345) GN=nuoB1 PE=3 SV=1	25.8585	26.152	26.0929	25.4761	26.6538	26.4302	26.7475	26.5661	26.7174	26.631	26.6491	26.6544	26.6738	26.6291	26.6402	26.6176	Cluster -2	4	25.4	23.598	0	15.782	4.15251	0.000110108
Pg_S1717.3	glyoxalase 2-4	AT1G06130.1	A2C7W3	AT1G06130.1 | Symbols: GLX2-4 | glyoxalase 2-4 | chr1:1858034-1860640 REVERSE LENGTH=331	Hydroxyacylglutathione hydrolase OS=Prochlorococcus marinus (strain MIT 9303) GN=gloB PE=3 SV=1	24.3037	26.3763	24.296	23.7722	26.6475	26.1137	26.0948	26.0978	26.227	26.034	26.2439	26.1351	25.8071	25.7417	25.9103	25.8463	Cluster -2	5	24.2	36.664	0	16.188	1.95907	0.0131242
Pg_S2121.8	NADH-ubiquinone oxidoreductase-related	AT5G67590.1	Q9FJW4	AT5G67590.1 | Symbols: FRO1 | NADH-ubiquinone oxidoreductase-related | chr5:26958073-26959356 FORWARD LENGTH=154	NADH dehydrogenase [ubiquinone] iron-sulfur protein 4, mitochondrial OS=Arabidopsis thaliana GN=FRO1 PE=2 SV=1	23.7909	25.0951	23.508	23.3299	25.9099	25.7677	25.8309	25.6811	26.0603	25.5124	26.0185	26.0213	25.079	25.3296	25.1217	25.1283	Cluster -2	5	41.8	19.691	0	21.62	4.01517	0.000148492
Pg_S6308.2	NAD(P)-linked oxidoreductase superfamily protein	AT1G59960.1	P78736	AT1G59960.1 | Symbols: | NAD(P)-linked oxidoreductase superfamily protein | chr1:22071410-22073067 REVERSE LENGTH=326	NAD(P)H-dependent D-xylose reductase OS=Pachysolen tannophilus GN=XYL1 PE=1 SV=1	23.2539	23.1865	24.0115	25.1432	25.7668	25.836	25.7287	26.0352	25.7825	25.6571	25.8613	25.4705	25.7149	25.6895	25.5543	25.7243	Cluster -2	4	28.2	34.586	0	11.874	3.68896	0.000301421
Pg_S2113.13	Cytochrome C1 family	AT5G40810.1	P51131	AT5G40810.1 | Symbols: | Cytochrome C1 family | chr5:16340200-16342327 FORWARD LENGTH=307	Cytochrome b/c1 OS=Bradyrhizobium diazoefficiens (strain JCM 10833 / IAM 13628 / NBRC 14792 / USDA 110) GN=fbcH PE=1 SV=1	23.5852	23.1789	23.4821	25.9583	25.4508	25.7971	25.6348	26.5276	26.5945	26.769	26.2803	26.8643	25.9757	26.2329	26.0521	26.0983	Cluster -2	4	22.7	33.808	0	35.181	2.90536	0.00165912
Pg_S0662.35	ferredoxin 3	AT2G27510.1	P26395	AT2G27510.1 | Symbols: ATFD3, FD3 | ferredoxin 3 | chr2:11758281-11758748 REVERSE LENGTH=155	Protein RfbI OS=Salmonella typhimurium (strain LT2 / SGSC1412 / ATCC 700720) GN=rfbI PE=3 SV=1	23.8786	23.3781	22.845	26.7637	27.5956	27.6486	27.8452	27.7508	27.8574	28.0467	28.5989	27.8067	26.7405	26.373	26.7195	26.5082	Cluster -2	1	53.6	15.959	0	20.979	3.63264	0.000340901
Pg_S5750.1	Peptidase family M48 family protein	AT5G51740.1	Q9KQ40	AT5G51740.1 | Symbols: | Peptidase family M48 family protein | chr5:21017110-21018987 FORWARD LENGTH=442	Putative beta-barrel assembly-enhancing protease OS=Vibrio cholerae serotype O1 (strain ATCC 39315 / El Tor Inaba N16961) GN=VC_2164 PE=3 SV=1	24.9432	23.8178	25.3899	26.9991	26.9062	26.9237	26.7641	27.1957	27.1299	27.2336	27.0592	27.1707	26.8721	26.8874	26.8453	26.8547	Cluster -2	9	16.8	85.358	0	33.208	2.16335	0.00848324
Pg_S7834.1	cytosolic invertase 2	AT4G09510.1	Q9LQF2	AT4G09510.1 | Symbols: CINV2 | cytosolic invertase 2 | chr4:6021312-6023310 REVERSE LENGTH=558	Alkaline/neutral invertase CINV1 OS=Arabidopsis thaliana GN=CINV1 PE=1 SV=1	23.7293	25.2083	22.6029	24.3709	25.6957	25.779	26.1681	25.6939	25.6365	25.5183	25.6015	25.5298	26.1776	26.3174	26.1397	26.33	Cluster -2	5	14.2	61.377	0	14.282	3.25619	0.00077097
Pg_S5671.2	unknown	unknown	unknown	unknown	unknown	26.3008	26.5516	26.1915	26.8723	27.5391	27.3112	27.046	27.3959	27.449	27.19	27.0958	27.1309	27.3523	27.3492	27.3853	27.3896	Cluster -2	3	14.6	118.71	0	33.044	3.9323	0.000178292
Pg_S3862.18	Dihydropterin pyrophosphokinase / Dihydropteroate synthase	AT4G30000.2	Q9CGE3	AT4G30000.2 | Symbols: | Dihydropterin pyrophosphokinase / Dihydropteroate synthase | chr4:14670417-14672397 REVERSE LENGTH=561	Bifunctional protein FolKE OS=Lactococcus lactis subsp. lactis (strain IL1403) GN=folKE PE=3 SV=1	23.3554	24.0866	23.6202	24.5082	24.9785	24.8458	24.9057	25.0608	25.0953	25.0631	24.8142	24.7739	24.7298	24.792	24.7836	24.8658	Cluster -2	5	14.5	54.403	0	13.826	3.44561	0.000509215
Pg_S2147.1	short-chain dehydrogenase-reductase B	AT3G12800.1	P33368	AT3G12800.1 | Symbols: SDRB, DECR | short-chain dehydrogenase-reductase B | chr3:4063463-4064757 REVERSE LENGTH=298	Uncharacterized oxidoreductase YohF OS=Escherichia coli (strain K12) GN=yohF PE=3 SV=2	24.0814	25.3955	23.6989	25.49	25.7731	25.6378	25.6124	25.356	25.874	25.7045	25.9953	25.9185	25.9139	26.0386	26.0959	26.1246	Cluster -2	4	23.9	31.545	0	11.304	2.20925	0.00768166
Pg_S3498.11	ABC transporter family protein	AT5G60790.1	Q217B2	AT5G60790.1 | Symbols: ATGCN1, GCN1 | ABC transporter family protein | chr5:24453760-24455767 REVERSE LENGTH=595	Hemin import ATP-binding protein HmuV OS=Rhodopseudomonas palustris (strain BisB18) GN=hmuV PE=3 SV=1	22.9411	24.966	23.1521	23.5615	25.1433	25.2199	25.1918	25.0875	25.1358	25.3468	22.8976	25.1983	25.3166	25.0514	25.308	25.3379	Cluster -2	3	7.2	63.77	0	21.232	1.42367	0.0423038
Pg_S4699.13	heat shock cognate protein 70-1	AT5G02500.1	P0CW13	AT5G02500.1 | Symbols: HSC70-1, HSP70-1, AT-HSC70-1, HSC70 | heat shock cognate protein 70-1 | chr5:554055-556334 REVERSE LENGTH=651	Chaperone protein DnaK OS=Methanosarcina mazei (strain ATCC BAA-159 / DSM 3647 / Goe1 / Go1 / JCM 11833 / OCM 88) GN=dnaK PE=3 SV=1	28.5487	28.6076	28.594	28.7126	30.1232	29.9816	29.96	29.9693	29.4801	29.5571	29.5359	29.5451	30.4947	30.539	30.5148	30.4928	Cluster -2	9	65.1	71.158	0	129.78	13.4857	6.02449e-13
Pg_S4201.2	Eukaryotic aspartyl protease family protein	AT1G25510.1	Q0IU52	AT1G25510.1 | Symbols: | Eukaryotic aspartyl protease family protein | chr1:8959372-8960823 REVERSE LENGTH=483	Aspartic proteinase Asp1 OS=Oryza sativa subsp. japonica GN=ASP1 PE=2 SV=1	23.0763	24.0023	24.075	24.1493	28.7298	28.8461	28.663	28.8735	26.7729	27.3556	27.1068	27.2278	29.4167	29.4977	29.4668	29.3113	Cluster -2	2	39.5	47.217	0	39.578	10.8352	1.07467e-10
Pg_S3575.10	phospholipase C 2	AT3G08510.1	Q9BRC7	AT3G08510.1 | Symbols: ATPLC2, PLC2 | phospholipase C 2 | chr3:2582626-2585556 REVERSE LENGTH=581	1-phosphatidylinositol 4,5-bisphosphate phosphodiesterase delta-4 OS=Homo sapiens GN=PLCD4 PE=1 SV=1	23.5013	24.9718	24.0129	24.4013	26.0085	25.8818	26.0317	25.8365	25.097	25.1221	25.0887	24.9573	26.3545	25.9055	26.6528	26.0113	Cluster -2	6	26.4	67.768	0	22.535	4.77362	2.86195e-05
Pg_S3439.3	sterol methyltransferase 1	AT5G13710.1	Q4L6H3	AT5G13710.1 | Symbols: SMT1, CPH | sterol methyltransferase 1 | chr5:4424048-4426866 REVERSE LENGTH=336	Demethylmenaquinone methyltransferase OS=Staphylococcus haemolyticus (strain JCSC1435) GN=ubiE PE=3 SV=1	23.9051	25.0082	24.3084	24.5004	27.0688	27.1287	27.305	27.2436	26.0069	25.9238	26.0814	26.237	27.342	27.4378	27.4092	27.3865	Cluster -2	4	28.2	44.813	0	44.157	8.53933	1.03841e-08
Pg_S3300.18	heat shock cognate protein 70-1	AT5G02500.1	P0CW13	AT5G02500.1 | Symbols: HSC70-1, HSP70-1, AT-HSC70-1, HSC70 | heat shock cognate protein 70-1 | chr5:554055-556334 REVERSE LENGTH=651	Chaperone protein DnaK OS=Methanosarcina mazei (strain ATCC BAA-159 / DSM 3647 / Goe1 / Go1 / JCM 11833 / OCM 88) GN=dnaK PE=3 SV=1	31.2145	31.2541	31.193	31.2786	32.0731	32.0809	32.0873	32.023	31.7207	31.6754	31.7078	31.6985	32.2734	32.2755	32.2784	32.249	Cluster -2	2	65.1	70.831	0	293.5	14.275	1.44947e-13
Pg_S3092.15	Aldolase superfamily protein	AT1G69740.1	Q59295	AT1G69740.1 | Symbols: HEMB1 | Aldolase superfamily protein | chr1:26232197-26234713 FORWARD LENGTH=430	Delta-aminolevulinic acid dehydratase (Fragment) OS=Clostridium josui GN=hemB PE=3 SV=1	25.5579	25.8495	25.8142	25.8364	26.9828	26.996	26.9969	26.8893	26.668	26.6803	26.5153	26.5416	27.2958	26.8764	27.3942	27.0043	Cluster -2	8	22.3	60.955	0	39.977	7.0825	2.10587e-07
Pg_S2891.21	Aldolase-type TIM barrel family protein	AT5G13420.1	Q255E4	AT5G13420.1 | Symbols: | Aldolase-type TIM barrel family protein | chr5:4302080-4304212 REVERSE LENGTH=438	Transaldolase OS=Chlamydophila felis (strain Fe/C-56) GN=tal PE=3 SV=1	23.5703	24.385	24.6314	24.0689	25.3089	25.5296	25.5716	25.4269	24.5551	24.7695	24.9592	24.7956	25.8001	25.8188	25.7317	25.8039	Cluster -2	1	23.8	31.639	0	28.964	5.37256	7.91786e-06
Pg_S5530.7	Ribosomal protein L2 family	AT4G36130.1	A2SPK6	AT4G36130.1 | Symbols: | Ribosomal protein L2 family | chr4:17097613-17098656 FORWARD LENGTH=258	50S ribosomal protein L2 OS=Methanocorpusculum labreanum (strain ATCC 43576 / DSM 4855 / Z) GN=rpl2 PE=3 SV=1	29.952	30.1801	29.934	30.0757	31.028	31.0994	31.0148	30.854	30.6555	30.6715	30.6292	30.5859	31.2507	31.4348	31.3069	31.3584	Cluster -2	1	45.4	28.113	0	97.987	9.17465	2.87628e-09
Pg_S2207.14	Ribosomal protein L18e/L15 superfamily protein	AT1G23290.1	Q6LXD1	AT1G23290.1 | Symbols: RPL27A, RPL27AB | Ribosomal protein L18e/L15 superfamily protein | chr1:8263007-8263447 FORWARD LENGTH=146	50S ribosomal protein L15 OS=Methanococcus maripaludis (strain S2 / LL) GN=rpl15 PE=3 SV=1	28.7024	28.6106	28.7848	28.6436	29.5418	29.4387	29.4722	29.4309	29.2086	29.2203	29.1019	29.045	29.6159	29.6287	29.5994	29.6743	Cluster -2	2	43.2	16.348	0	45.805	9.3314	2.09841e-09
Pg_S8495.1	histone deacetylase 3	AT3G44750.1	Q9LZR5	AT3G44750.1 | Symbols: HD2A, ATHD2A, HDA3, HDT1 | histone deacetylase 3 | chr3:16298045-16299585 FORWARD LENGTH=245	Histone deacetylase HDT3 OS=Arabidopsis thaliana GN=HDT3 PE=1 SV=2	24.2246	24.4697	24.4839	24.6231	26.7903	26.8465	26.7729	26.5064	26.2964	26.4995	26.1688	26.2959	27.972	27.9491	27.9999	27.9313	Cluster -2	2	19.3	31.792	0	13.08	12.0524	9.79114e-12
Pg_S6471.11	methionine synthase 2	AT3G03780.1	A8YZI1	AT3G03780.1 | Symbols: ATMS2, MS2 | methionine synthase 2 | chr3:957602-960740 FORWARD LENGTH=765	5-methyltetrahydropteroyltriglutamate--homocysteine methyltransferase OS=Staphylococcus aureus (strain USA300 / TCH1516) GN=metE PE=3 SV=1	30.732	30.7078	30.7912	30.8307	31.581	31.6348	31.665	31.4801	31.4227	31.4502	31.5237	31.4944	32.0784	32.162	32.1064	32.1544	Cluster -2	2	62.7	84.776	0	226.08	11.3989	3.41742e-11
Pg_S6197.2	BCL-2-associated athanogene 7	AT5G62390.1	Q9LVA0	AT5G62390.1 | Symbols: ATBAG7, BAG7 | BCL-2-associated athanogene 7 | chr5:25052377-25054170 REVERSE LENGTH=446	BAG family molecular chaperone regulator 7 OS=Arabidopsis thaliana GN=BAG7 PE=1 SV=1	24.8037	25.6517	25.0339	26.0849	27.5292	27.504	27.5646	27.5902	27.1802	27.0736	27.1061	27.2246	28.513	28.5531	28.5393	28.5455	Cluster -2	5	27	46.311	0	58.311	7.45677	9.60981e-08
Pg_S5575.7	Chaperone protein htpG family protein	AT4G24190.1	B0UN89	AT4G24190.1 | Symbols: SHD, HSP90.7, AtHsp90.7, AtHsp90-7 | Chaperone protein htpG family protein | chr4:12551902-12555851 REVERSE LENGTH=823	Chaperone protein HtpG OS=Methylobacterium sp. (strain 4-46) GN=htpG PE=3 SV=1	28.8835	28.8916	28.9447	28.9704	30.0705	30.2778	30.2973	30.1616	29.8051	29.7345	29.8089	29.7993	30.6237	30.7805	30.6379	30.7161	Cluster -2	2	44.1	93.113	0	199.86	11.9131	1.28554e-11
Pg_S5121.5	TCP-1/cpn60 chaperonin family protein	AT3G18190.1	Q6NF74	AT3G18190.1 | Symbols: | TCP-1/cpn60 chaperonin family protein | chr3:6232226-6233836 FORWARD LENGTH=536	60 kDa chaperonin 2 OS=Corynebacterium diphtheriae (strain ATCC 700971 / NCTC 13129 / Biotype gravis) GN=groL2 PE=3 SV=1	28.6122	28.1617	28.5901	28.6711	29.3488	29.3893	29.3271	29.1592	28.9415	29.0145	28.9635	29.041	29.4638	29.5512	29.5184	29.5337	Cluster -2	1	48.2	73.966	0	122.49	6.07134	1.78073e-06
Pg_S2774.2	beta-galactosidase 10	AT5G63810.1	Q0CMF3	AT5G63810.1 | Symbols: BGAL10 | beta-galactosidase 10 | chr5:25537242-25541315 FORWARD LENGTH=741	Probable beta-galactosidase B OS=Aspergillus terreus (strain NIH 2624 / FGSC A1156) GN=lacB PE=3 SV=2	25.0891	23.9484	25.7302	26.2616	27.6315	27.5079	27.6186	27.5532	26.95	27.0633	27.0823	27.1243	28.5315	28.6523	28.7006	28.9384	Cluster -2	13	27.5	94.405	0	70.796	5.2871	9.48079e-06
Pg_S2608.6	PA-domain containing subtilase family protein	AT4G30020.1	Q9LLL8	AT4G30020.1 | Symbols: | PA-domain containing subtilase family protein | chr4:14678251-14681762 FORWARD LENGTH=816	Xylem serine proteinase 1 OS=Arabidopsis thaliana GN=XSP1 PE=2 SV=1	24.084	24.2075	24.6383	24.5172	26.9268	26.7193	26.8813	26.9594	26.7624	26.8371	26.7414	26.7406	27.8179	27.9571	27.9538	27.9459	Cluster -2	9	19.2	87.335	0	47.439	11.7198	1.83267e-11
Pg_S1345.3	Lactate/malate dehydrogenase family protein	AT1G53240.1	B3EEE5	AT1G53240.1 | Symbols: mMDH1 | Lactate/malate dehydrogenase family protein | chr1:19854966-19856802 REVERSE LENGTH=341	Malate dehydrogenase OS=Chlorobium limicola (strain DSM 245 / NBRC 103803) GN=mdh PE=3 SV=1	30.0605	29.9379	29.996	29.9754	30.5957	30.5209	30.4815	30.2723	30.4941	30.4481	30.5221	30.4514	30.7852	30.8091	30.7567	30.8284	Cluster -2	1	57	35.144	0	127.69	7.24149	1.50602e-07
Pg_S1205.13	unknown	unknown	unknown	unknown	unknown	24.1524	23.4445	24.3789	24.5206	26.8093	26.7264	26.6235	26.7631	26.5806	26.4904	26.7479	26.5979	27.5533	27.6029	27.5588	27.5538	Cluster -2	4	40.5	39.971	0	27.494	8.93006	4.66988e-09
Pg_S1018.4	Class-II DAHP synthetase family protein	AT1G22410.1	P55911	AT1G22410.1 | Symbols: | Class-II DAHP synthetase family protein | chr1:7912120-7914742 FORWARD LENGTH=527	Phospho-2-dehydro-3-deoxyheptonate aldolase (Fragment) OS=Streptomyces lividans PE=3 SV=1	25.6881	23.678	24.0427	23.7394	26.9717	27.0371	27.0083	27.4192	27.0039	26.4364	26.6697	26.7803	28.7913	28.8183	28.7104	28.8666	Cluster -2	10	34.6	58.468	0	51.054	6.57165	6.17809e-07
Pg_S3848.10	RNA-binding (RRM/RBD/RNP motifs) family protein	AT4G14300.1	Q6GLB5	AT4G14300.1 | Symbols: | RNA-binding (RRM/RBD/RNP motifs) family protein | chr4:8231179-8232785 FORWARD LENGTH=411	ELAV-like protein 1 OS=Xenopus tropicalis GN=elavl1 PE=2 SV=1	27.6917	27.4008	27.6096	27.7081	28.5901	28.6915	28.6449	28.5409	28.6775	28.6896	28.4911	28.4108	29.1753	29.1364	29.09	29.0858	Cluster -2	6	31.2	48.816	0	70.545	8.92362	4.72024e-09
Pg_S0922.18	serine carboxypeptidase-like 20	AT4G12910.1	B6V867	AT4G12910.1 | Symbols: scpl20 | serine carboxypeptidase-like 20 | chr4:7550576-7553051 REVERSE LENGTH=497	Carboxypeptidase S1 homolog A OS=Trichophyton tonsurans GN=SCPA PE=3 SV=1	27.3882	27.3148	27.4187	27.3957	28.4215	28.6418	28.2847	28.2311	28.6414	28.542	28.6292	28.5311	29.19	29.1092	29.1067	29.2143	Cluster -2	1	24.4	55.004	0	71.889	9.89768	6.79565e-10
Pg_S0588.20	WD-40 repeat family protein / beige-related	AT2G45540.2	O75529	AT2G45540.2 | Symbols: | WD-40 repeat family protein / beige-related | chr2:18757881-18772229 REVERSE LENGTH=3001	TAF5-like RNA polymerase II p300/CBP-associated factor-associated factor 65 kDa subunit 5L OS=Homo sapiens GN=TAF5L PE=1 SV=1	23.4499	22.5796	23.4954	23.8235	25.6737	25.3614	25.6292	25.3819	24.857	24.5103	24.6373	24.8742	25.9196	25.9951	26.0363	26.0087	Cluster -2	2	5.2	325.05	0	22.174	6.8802	3.22885e-07
Pg_S0368.6	translation initiation factor 3B1	AT5G27640.2	P12806	AT5G27640.2 | Symbols: TIF3B1, EIF3B, ATEIF3B-1, EIF3B-1, ATTIF3B1 | translation initiation factor 3B1 | chr5:9781207-9784759 REVERSE LENGTH=738	Eukaryotic translation initiation factor 3 subunit B (Fragment) OS=Pichia angusta GN=TIF32 PE=3 SV=1	28.086	27.6569	28.1848	28.056	28.9335	28.9915	28.9254	28.9374	28.9392	28.8447	28.8171	28.7636	29.43	29.4371	29.4516	29.4373	Cluster -2	2	41	82.755	0	93.385	7.9022	3.82375e-08
Pg_S0096.36	Pectinacetylesterase family protein	AT3G05910.1	Q6P988	AT3G05910.1 | Symbols: | Pectinacetylesterase family protein | chr3:1764509-1767240 REVERSE LENGTH=415	Protein notum homolog OS=Homo sapiens GN=NOTUM PE=2 SV=2	24.1714	23.3937	24.3772	25.71	28.8032	28.6784	28.709	28.4446	28.4178	28.2489	28.3869	28.4712	30.8642	30.9209	30.9089	30.8406	Cluster -2	4	63.2	44.125	0	182.83	8.50097	1.11221e-08
Pg_S0285.13	NADH dehydrogenase subunit 7	ATMG00510.1	A8FNN4	ATMG00510.1 | Symbols: NAD7 | NADH dehydrogenase subunit 7 | chrM:132071-138153 FORWARD LENGTH=394	NADH-quinone oxidoreductase subunit D OS=Campylobacter jejuni subsp. jejuni serotype O:6 (strain 81116 / NCTC 11828) GN=nuoD PE=3 SV=1	26.2651	26.3401	26.3239	26.3011	27.3413	27.375	26.9707	27.1524	27.3999	26.9165	27.1077	26.9999	27.8379	27.519	27.4809	27.4905	Cluster -2	4	33.1	17.422	0	23.245	5.9063	2.52878e-06
Pg_S7119.4	Phosphoinositide phosphatase family protein	AT5G66020.1	P40559	AT5G66020.1 | Symbols: IBS2, ATSAC1B, ATSAC6, SACIB | Phosphoinositide phosphatase family protein | chr5:26401193-26404691 REVERSE LENGTH=593	Phosphatidylinositol 4,5-bisphosphate 5-phosphatase INP51 OS=Saccharomyces cerevisiae (strain ATCC 204508 / S288c) GN=INP51 PE=1 SV=1	23.4372	24.1598	23.6432	22.7606	26.0012	25.821	25.8187	25.9495	25.6569	25.8291	25.8559	25.8023	26.3226	26.3758	26.5144	26.3096	Cluster -2	7	15.8	66.649	0	21.943	7.26428	1.43553e-07
Pg_S6802.4	DnaJ / Sec63 Brl domains-containing protein	AT1G79940.1	Q45552	AT1G79940.1 | Symbols: ATERDJ2A | DnaJ / Sec63 Brl domains-containing protein | chr1:30070023-30073237 FORWARD LENGTH=687	Chaperone protein DnaJ OS=Geobacillus stearothermophilus GN=dnaJ PE=3 SV=1	23.6421	23.5976	23.9347	23.4168	25.3179	25.4449	25.3097	25.3076	25.6177	25.5245	25.4775	25.3383	26.1212	26.1001	26.1381	26.1854	Cluster -2	7	15.9	76.66	0	21.98	10.6049	1.67558e-10
Pg_S6758.3	ATPase, V1 complex, subunit B protein	AT4G38510.5	Q5Z0Y3	AT4G38510.5 | Symbols: | ATPase, V1 complex, subunit B protein | chr4:18011155-18014897 REVERSE LENGTH=494	ATP synthase subunit alpha OS=Nocardia farcinica (strain IFM 10152) GN=atpA PE=3 SV=1	23.5816	23.0435	23.0108	24.2382	26.8794	26.718	26.7936	26.8213	27.8323	27.7518	27.6982	27.6969	27.8326	27.7584	27.7649	27.7698	Cluster -2	2	61	61.069	0	22.913	9.71255	9.91126e-10
Pg_S5025.6	Cupredoxin superfamily protein	AT1G23010.1	B0UVZ0	AT1G23010.1 | Symbols: LPR1 | Cupredoxin superfamily protein | chr1:8147353-8149580 FORWARD LENGTH=581	Cell division protein FtsP OS=Histophilus somni (strain 2336) GN=ftsP PE=3 SV=1	23.3884	24.2651	24.1522	24.1523	28.082	27.8813	27.9052	27.9636	27.9255	27.9907	27.9779	28.0556	28.8165	28.9155	28.8012	28.8765	Cluster -2	2	15.3	65.882	0	115.08	11.7383	1.7685e-11
Pg_S3513.13	Sec23/Sec24 protein transport family protein	AT1G05520.1	P38769	AT1G05520.1 | Symbols: | Sec23/Sec24 protein transport family protein | chr1:1631126-1635703 REVERSE LENGTH=783	Uncharacterized protein YHR035W OS=Saccharomyces cerevisiae (strain ATCC 204508 / S288c) GN=YHR035W PE=1 SV=1	23.6133	23.572	23.3121	23.5574	24.5034	24.4864	24.3331	24.3518	24.6561	24.4281	24.4725	24.4548	24.8478	24.7575	24.9944	24.7968	Cluster -2	3	3.5	94.86	0	6.8689	8.22627	1.94437e-08
Pg_S2995.3	Ribosomal protein L2 family	AT4G36130.1	A2SPK6	AT4G36130.1 | Symbols: | Ribosomal protein L2 family | chr4:17097613-17098656 FORWARD LENGTH=258	50S ribosomal protein L2 OS=Methanocorpusculum labreanum (strain ATCC 43576 / DSM 4855 / Z) GN=rpl2 PE=3 SV=1	23.1007	23.0463	23.6124	24.2865	26.2934	26.3685	26.5342	26.2134	26.3417	26.4042	26.5518	26.5125	27.1444	27.2044	27.2522	27.2156	Cluster -2	1	45.4	28.143	0	16.916	8.41443	1.33309e-08
Pg_S2803.8	Pentatricopeptide repeat (PPR) superfamily protein	AT3G48250.1	Q9STK5	AT3G48250.1 | Symbols: | Pentatricopeptide repeat (PPR) superfamily protein | chr3:17870064-17871929 REVERSE LENGTH=621	Pentatricopeptide repeat-containing protein At3g48250, chloroplastic OS=Arabidopsis thaliana GN=At3g48250 PE=2 SV=1	24.2	24.1072	24.668	23.1045	26.8983	26.8145	26.7473	26.6935	27.1977	27.4177	27.4837	27.4537	27.2819	27.2983	27.3383	27.3058	Cluster -2	1	16.8	89.426	0	31.948	7.72966	5.42017e-08
Pg_S2706.12	S-adenosyl-L-homocysteine hydrolase	AT4G13940.1	P26799	AT4G13940.1 | Symbols: HOG1, EMB1395, SAHH1, MEE58, ATSAHH1 | S-adenosyl-L-homocysteine hydrolase | chr4:8054931-8056676 FORWARD LENGTH=485	Adenosylhomocysteinase (Fragment) OS=Streptomyces fradiae GN=ahcY PE=3 SV=1	31.5614	31.6007	31.5491	31.5236	32.9521	32.9905	32.9742	32.9876	33.3174	33.3255	33.3354	33.359	33.8851	33.9525	33.95	33.939	Cluster -2	15	78.1	53.14	0	323.31	18.6378	5.4355e-17
Pg_S2471.14	ATP synthase subunit 1	ATMG01190.1	A4QL04	ATMG01190.1 | Symbols: ATP1 | ATP synthase subunit 1 | chrM:302166-303689 REVERSE LENGTH=507	ATP synthase subunit alpha, chloroplastic OS=Draba nemorosa GN=atpA PE=3 SV=1	23.5012	22.8149	23.2842	23.3853	28.9837	29.0704	29.3111	28.9117	29.3608	29.2564	29.2865	29.159	29.7737	29.7527	29.9413	29.6674	Cluster -2	1	4.3	30.583	0	6.7433	14.1205	1.89051e-13
Pg_S1744.8	MLP-like protein 31	AT1G70840.1	Q93VR4	AT1G70840.1 | Symbols: MLP31 | MLP-like protein 31 | chr1:26713170-26714014 REVERSE LENGTH=171	MLP-like protein 423 OS=Arabidopsis thaliana GN=MLP423 PE=2 SV=1	23.2993	23.335	24.8125	23.7922	28.2961	28.2752	28.3094	28.1914	30.4449	30.3407	30.0172	29.7698	30.4666	30.4313	30.3625	30.4197	Cluster -2	3	84.8	16.84	0	36.129	10.3516	2.78189e-10
Pg_S1734.11	catalytics	AT1G74790.1	P75804	AT1G74790.1 | Symbols: | catalytics | chr1:28098912-28101673 FORWARD LENGTH=695	Soluble aldose sugar dehydrogenase YliI OS=Escherichia coli (strain K12) GN=yliI PE=1 SV=1	27.2995	27.2413	27.3895	27.0738	27.8421	27.8018	27.6737	27.7756	27.9564	27.9189	27.971	27.9399	28.123	28.0911	28.1253	27.9809	Cluster -2	5	25.2	110.13	0	62.369	7.33717	1.22716e-07
Pg_S1530.25	Eukaryotic aspartyl protease family protein	AT1G25510.1	Q0IU52	AT1G25510.1 | Symbols: | Eukaryotic aspartyl protease family protein | chr1:8959372-8960823 REVERSE LENGTH=483	Aspartic proteinase Asp1 OS=Oryza sativa subsp. japonica GN=ASP1 PE=2 SV=1	24.7524	23.7153	23.4889	23.5497	27.8901	27.958	28.0219	27.3716	28.453	28.5326	28.0722	28.5594	28.3187	28.3586	28.3728	28.4164	Cluster -2	5	16.1	51.369	0	10.769	9.11975	3.19735e-09
Pg_S4947.5	MAP kinase kinase 2	AT4G29810.2	Q5R8Z4	AT4G29810.2 | Symbols: ATMKK2, MKK2, MK1 | MAP kinase kinase 2 | chr4:14593299-14595241 REVERSE LENGTH=372	Serine/threonine-protein kinase PAK 6 OS=Pongo abelii GN=PAK6 PE=2 SV=1	24.7378	23.4394	23.7542	23.8616	26.3004	26.1766	26.1671	26.475	26.5342	26.5126	26.511	26.3263	26.7733	26.8758	26.9387	26.887	Cluster -2	4	18.9	39.243	0	17.674	7.50265	8.77998e-08
Pg_S1305.17	Insulinase (Peptidase family M16) protein	AT3G02090.2	O31766	AT3G02090.2 | Symbols: MPPBETA | Insulinase (Peptidase family M16) protein | chr3:365624-368534 FORWARD LENGTH=535	Uncharacterized zinc protease YmfH OS=Bacillus subtilis (strain 168) GN=ymfH PE=3 SV=2	28.5234	28.42	28.542	28.5667	29.8119	29.9123	29.9195	29.876	30.1247	30.1707	30.1276	30.0987	30.244	30.3181	30.2404	30.3213	Cluster -2	3	53.5	53.89	0	297.35	14.1925	1.64639e-13
Pg_S3379.2	nucleolin like 2	AT3G18610.1	Q9FVQ1	AT3G18610.1 | Symbols: PARLL1, ATNUC-L2, NUC-L2 | nucleolin like 2 | chr3:6404270-6407822 REVERSE LENGTH=636	Nucleolin 1 OS=Arabidopsis thaliana GN=NUCL1 PE=1 SV=1	23.6958	23.8107	23.6514	23.3561	26.088	26.1143	26.0515	25.6705	25.9328	25.9983	26.0378	25.944	26.3611	26.575	26.3647	26.4043	Cluster -2	6	15.4	68.095	0	29.353	10.593	1.71817e-10
Pg_S2296.5	rotamase cyclophilin 2	AT3G56070.1	P23285	AT3G56070.1 | Symbols: ROC2 | rotamase cyclophilin 2 | chr3:20806987-20807517 REVERSE LENGTH=176	Peptidyl-prolyl cis-trans isomerase B OS=Saccharomyces cerevisiae (strain ATCC 204508 / S288c) GN=CPR2 PE=1 SV=1	26.9115	26.8416	26.753	26.5631	28.635	28.7015	28.637	28.6277	28.7943	28.8048	28.8271	28.7713	29.0205	29.106	29.1137	29.0515	Cluster -2	6	40.8	18.693	0	43.124	12.8888	1.90759e-12
Pg_S0434.4	calreticulin 1a	AT1G56340.1	Q9D9Q6	AT1G56340.1 | Symbols: CRT1, CRT1a, AtCRT1a | calreticulin 1a | chr1:21090059-21092630 REVERSE LENGTH=425	Calreticulin-3 OS=Mus musculus GN=Calr3 PE=1 SV=2	23.8826	24.5537	24.5749	24.3816	27.8215	27.8156	27.8348	28.0028	28.1423	27.8961	28.1045	28.7274	29.2999	29.4358	29.4754	29.2913	Cluster -2	2	51.2	51.666	0	26.394	10.8471	1.0525e-10
Pg_S7710.3	Subtilisin-like serine endopeptidase family protein	AT4G15040.1	F4JXC5	AT4G15040.1 | Symbols: | Subtilisin-like serine endopeptidase family protein | chr4:8581373-8584122 REVERSE LENGTH=687	Subtilisin-like protease SBT5.4 OS=Arabidopsis thaliana GN=SBT5.4 PE=1 SV=1	24.2381	23.409	24.0672	24.0594	27.2119	27.5234	27.1884	27.498	26.7459	26.5563	26.852	26.8085	27.7555	28.0094	27.8223	27.9224	Cluster -2	8	23.1	83.948	0	53.344	10.3678	2.70356e-10
Pg_S7390.2	glutamate-cysteine ligase	AT4G23100.1	A2YL07	AT4G23100.1 | Symbols: RML1, PAD2, GSH1, CAD2, ATECS1, GSHA | glutamate-cysteine ligase | chr4:12103458-12106751 REVERSE LENGTH=522	Glutamate--cysteine ligase B, chloroplastic OS=Oryza sativa subsp. indica GN=GSH1-2 PE=3 SV=2	27.8	27.888	27.7755	27.8184	28.5799	28.7125	28.7456	28.8	28.6286	28.5164	28.5362	28.5665	28.779	28.8697	28.7709	28.8156	Cluster -2	15	43.7	66.763	0	115.48	9.86779	7.21286e-10
Pg_S7160.1	receptor for activated C kinase 1B	AT1G48630.1	Q9FLX9	AT1G48630.1 | Symbols: RACK1B_AT | receptor for activated C kinase 1B | chr1:17981977-17983268 REVERSE LENGTH=326	Notchless protein homolog OS=Arabidopsis thaliana GN=NLE1 PE=2 SV=1	30.8721	30.9096	30.9277	30.9675	31.5577	31.6174	31.618	31.4397	31.3669	31.4175	31.3861	31.4147	31.5447	31.6042	31.5698	31.6154	Cluster -2	1	69.3	35.994	0	271.49	9.02002	3.91681e-09
Pg_S6457.1	eukaryotic translation initiation factor 3C	AT3G56150.1	Q6FIJ6	AT3G56150.1 | Symbols: EIF3C, ATEIF3C-1, EIF3C-1, ATTIF3C1, TIF3C1 | eukaryotic translation initiation factor 3C | chr3:20833790-20836820 REVERSE LENGTH=900	Eukaryotic translation initiation factor 3 subunit C OS=Candida glabrata (strain ATCC 2001 / CBS 138 / JCM 3761 / NBRC 0622 / NRRL Y-65) GN=NIP1 PE=3 SV=1	24.6952	24.4493	23.7662	24.1425	28.9282	28.8428	28.189	28.2521	28.0993	28.0994	28.1263	28.1598	29.2242	29.2425	29.2979	29.1667	Cluster -2	3	29.1	106.63	0	132.6	10.3957	2.5573e-10
Pg_S5143.5	arginine/serine-rich splicing factor 35	AT4G25500.1	P92966	AT4G25500.1 | Symbols: ATRSP35, ATRSP40, AT-SRP40, RSP35, RS40, At-RS40 | arginine/serine-rich splicing factor 35 | chr4:13025168-13027243 FORWARD LENGTH=350	Serine/arginine-rich splicing factor RS41 OS=Arabidopsis thaliana GN=RS41 PE=1 SV=2	23.2499	23.9838	23.751	22.9729	27.0237	27.0704	26.9905	27.132	26.6887	26.5443	26.8585	26.9801	27.696	27.8677	27.6657	27.8188	Cluster -2	4	13.9	50.325	0	26.388	10.029	5.26654e-10
Pg_S2754.9	eif4a-2	AT1G54270.1	Q9QY16	AT1G54270.1 | Symbols: EIF4A-2 | eif4a-2 | chr1:20260495-20262018 FORWARD LENGTH=412	ATP-dependent RNA helicase DDX25 OS=Rattus norvegicus GN=Ddx25 PE=1 SV=2	23.4457	24.592	24.5481	23.6299	26.642	26.8743	27.0803	26.8435	26.6659	26.2691	26.6799	26.2645	27.0988	27.2919	27.2528	27.3051	Cluster -2	2	76.8	46.923	0	16.375	7.21817	1.58334e-07
Pg_S2681.13	histone deacetylase 2C	AT5G03740.1	Q56WH4	AT5G03740.1 | Symbols: HD2C, HDT3 | histone deacetylase 2C | chr5:981994-983961 FORWARD LENGTH=294	Histone deacetylase HDT2 OS=Arabidopsis thaliana GN=HDT2 PE=1 SV=2	23.7891	22.5952	23.2325	23.4953	28.026	28.0793	28.0746	28.0447	27.6384	27.6844	27.523	27.572	28.9368	28.8864	28.9402	28.9553	Cluster -2	5	17.5	33.824	0	70.129	11.4468	3.1067e-11
Pg_S0323.5	Eukaryotic aspartyl protease family protein	AT1G25510.1	Q0IU52	AT1G25510.1 | Symbols: | Eukaryotic aspartyl protease family protein | chr1:8959372-8960823 REVERSE LENGTH=483	Aspartic proteinase Asp1 OS=Oryza sativa subsp. japonica GN=ASP1 PE=2 SV=1	29.0031	28.9284	29.038	29.146	31.7823	31.8707	31.7999	31.7221	31.0131	31.0154	30.9897	31.1141	31.9064	32.0213	32.0084	31.9911	Cluster -2	3	39.5	47.234	0	183.48	15.2368	2.33021e-14
Pg_S0896.40	beta glucosidase 13	AT5G44640.1	O52629	AT5G44640.1 | Symbols: BGLU13 | beta glucosidase 13 | chr5:18011146-18012669 FORWARD LENGTH=507	Beta-galactosidase OS=Pyrococcus woesei PE=1 SV=1	22.6396	26.2675	25.4391	26.3938	32.8637	32.907	32.8688	32.812	31.3508	31.3688	31.2833	31.2647	33.9102	33.9596	33.9792	34.0025	Cluster -2	19	64.1	61.045	0	323.31	7.47949	9.1899e-08
Pg_S7219.9	TCP-1/cpn60 chaperonin family protein	AT3G18190.1	Q6NF74	AT3G18190.1 | Symbols: | TCP-1/cpn60 chaperonin family protein | chr3:6232226-6233836 FORWARD LENGTH=536	60 kDa chaperonin 2 OS=Corynebacterium diphtheriae (strain ATCC 700971 / NCTC 13129 / Biotype gravis) GN=groL2 PE=3 SV=1	24.0639	23.6824	23.106	24.1551	26.5748	26.1654	26.2044	26.1178	26.1258	26.0154	26.2126	26.345	27.3264	27.3738	27.3857	27.2294	Cluster -2	3	46.1	57.234	0	24.253	8.56688	9.85617e-09
Pg_S3650.10	Pseudouridine synthase/archaeosine transglycosylase-like family protein	AT1G19920.1	Q54506	AT1G19920.1 | Symbols: APS2, ASA1 | Pseudouridine synthase/archaeosine transglycosylase-like family protein | chr1:6914835-6916657 REVERSE LENGTH=476	Sulfate adenylyltransferase OS=Riftia pachyptila sulfur-oxidizing endosymbiont GN=sat PE=1 SV=1	24.1548	24.1965	23.6543	23.5815	27.1638	27.015	27.1111	26.5053	26.2162	26.3111	26.7274	26.3248	27.8741	27.8726	27.8388	27.8528	Cluster -2	11	32.5	52.158	0	26.305	9.59426	1.24637e-09
Pg_S1974.14	Transducin family protein / WD-40 repeat family protein	AT4G33270.1	Q5IS43	AT4G33270.1 | Symbols: CDC20.1 | Transducin family protein / WD-40 repeat family protein | chr4:16044545-16046590 REVERSE LENGTH=457	Platelet-activating factor acetylhydrolase IB subunit alpha OS=Pan troglodytes GN=PAFAH1B1 PE=2 SV=3	25.0945	25.3965	24.6953	25.2386	25.6264	26.117	25.8129	25.9186	25.49	25.4176	25.8367	25.8141	25.9708	26.0656	25.8617	26.1857	Cluster -2	1	14.8	55.546	0	24.072	3.34298	0.000639302
Pg_S1014.31	ubiquitin-specific protease 12	AT5G06600.1	unknown	AT5G06600.1 | Symbols: UBP12 | ubiquitin-specific protease 12 | chr5:2019545-2027834 REVERSE LENGTH=1116	unknown	23.296	22.9305	22.5463	23.3423	24.9445	25.0454	25.1041	25.3007	24.6315	24.5905	24.9948	24.7901	25.3713	25.5284	25.2401	25.3401	Cluster -2	4	21.5	132.56	0	12.502	7.63668	6.60803e-08
Pg_S0747.44	Threonyl-tRNA synthetase	AT5G26830.1	A3QEK0	AT5G26830.1 | Symbols: | Threonyl-tRNA synthetase | chr5:9437351-9441568 FORWARD LENGTH=709	Threonine--tRNA ligase OS=Shewanella loihica (strain ATCC BAA-1088 / PV-4) GN=thrS PE=3 SV=1	26.7607	26.3925	26.0832	26.3458	27.2385	27.5324	27.2332	27.4662	27.2095	27.1454	27.2482	27.12	27.724	27.8174	27.4985	27.5513	Cluster -2	4	19.4	79.057	0	37.315	5.57105	5.18032e-06
Pg_S0550.6	DEK domain-containing chromatin associated protein	AT5G63550.2	Q7TNV0	AT5G63550.2 | Symbols: | DEK domain-containing chromatin associated protein | chr5:25444805-25447934 FORWARD LENGTH=531	Protein DEK OS=Mus musculus GN=Dek PE=1 SV=1	24.4656	24.4997	23.5867	24.9839	27.8743	27.9084	27.8536	27.7805	27.3704	27.4996	27.5359	27.7146	28.3533	28.4927	28.2573	28.4545	Cluster -2	13	24.8	69.873	0	91.642	8.87364	5.21741e-09
Pg_S0096.17	TUDOR-SN protein 1	AT5G07350.2	Q9BXT4	AT5G07350.2 | Symbols: Tudor1, AtTudor1, TSN1 | TUDOR-SN protein 1 | chr5:2320021-2324892 REVERSE LENGTH=1007	Tudor domain-containing protein 1 OS=Homo sapiens GN=TDRD1 PE=2 SV=2	24.0891	24.5571	23.1302	24.1256	26.0666	26.2185	26.2403	26.1597	26.1755	26.0599	26.0509	25.9421	26.6508	26.7065	26.6808	26.8771	Cluster -2	5	57.5	118.26	0	31.693	6.77523	4.03312e-07
Pg_S2579.9	Transducin/WD40 repeat-like superfamily protein	AT3G53390.1	Q8BHD1	AT3G53390.1 | Symbols: | Transducin/WD40 repeat-like superfamily protein | chr3:19792781-19796428 FORWARD LENGTH=558	POC1 centriolar protein homolog B OS=Mus musculus GN=Poc1b PE=2 SV=1	24.9347	23.3173	23.4534	23.8268	26.3686	26.292	26.3761	26.3213	26.1614	26.2122	26.2768	26.5225	27.316	27.2332	27.281	27.3412	Cluster -2	13	14.6	145.17	0	60.712	6.7552	4.18871e-07
Pg_S5954.3	Glycogen/starch synthases, ADP-glucose type	AT5G24300.1	Q935Y7	AT5G24300.1 | Symbols: SSI1, SSI, ATSS1 | Glycogen/starch synthases, ADP-glucose type | chr5:8266934-8270860 FORWARD LENGTH=652	Glycogen synthase OS=Synechococcus elongatus (strain PCC 7942) GN=glgA PE=3 SV=3	22.7938	23.7784	23.2914	24.049	28.942	28.9828	28.9257	28.7189	26.7699	27.0902	27.1629	27.0953	27.0729	26.8765	27.1635	27.0906	Cluster -2	3	31	71.509	0	70.831	10.0708	4.83954e-10
Pg_S5514.1	xylulose kinase-2	AT5G49650.1	Q9CFG8	AT5G49650.1 | Symbols: XK-2, XK2 | xylulose kinase-2 | chr5:20152898-20155574 FORWARD LENGTH=558	Xylulose kinase OS=Lactococcus lactis subsp. lactis (strain IL1403) GN=xylB PE=3 SV=1	23.5756	22.886	23.0407	23.7899	27.3555	27.36	27.4911	27.1717	25.7239	26.2191	25.7291	25.9407	26.9655	26.843	26.9513	26.8107	Cluster -2	8	21.3	61.394	0	35.633	9.75184	9.18386e-10
Pg_S5447.4	3-ketoacyl-acyl carrier protein synthase III	AT1G62640.1	P99159	AT1G62640.1 | Symbols: KAS III | 3-ketoacyl-acyl carrier protein synthase III | chr1:23192502-23194737 FORWARD LENGTH=404	3-oxoacyl-[acyl-carrier-protein] synthase 3 OS=Staphylococcus aureus (strain N315) GN=fabH PE=1 SV=1	24.7993	23.7426	23.2743	23.0838	26.2161	26.6044	26.4014	26.6115	26.1889	25.9734	25.9692	25.7527	26.4334	26.3881	26.5343	26.4547	Cluster -2	2	22.8	42.562	0	37.536	5.86999	2.73771e-06
Pg_S3077.2	diaminopimelate epimerase family protein	AT3G53580.1	A1AWJ5	AT3G53580.1 | Symbols: | diaminopimelate epimerase family protein | chr3:19864784-19866907 FORWARD LENGTH=362	Diaminopimelate epimerase OS=Ruthia magnifica subsp. Calyptogena magnifica GN=dapF PE=1 SV=1	24.4464	24.5456	23.5519	24.0353	28.7008	28.5163	28.3539	28.6532	27.279	27.2266	27.2636	27.219	27.7639	27.5923	27.4507	27.7514	Cluster -2	10	45.3	33.681	0	47.591	10.1688	4.00389e-10
Pg_S2791.8	homoserine kinase	AT2G17265.1	Q8L7R2	AT2G17265.1 | Symbols: HSK, DMR1 | homoserine kinase | chr2:7508606-7509718 FORWARD LENGTH=370	Homoserine kinase OS=Arabidopsis thaliana GN=HSK PE=1 SV=1	23.7146	23.769	23.5306	24.1748	26.5739	26.223	26.5884	26.6473	25.5319	25.4755	25.5183	25.5879	25.9105	25.6665	25.8226	25.9776	Cluster -2	4	32.3	36.752	0	24.949	9.26216	2.41603e-09
Pg_S2658.2	HIS HF	AT4G26900.1	Q3SPZ6	AT4G26900.1 | Symbols: AT-HF, HISN4 | HIS HF | chr4:13515514-13519608 FORWARD LENGTH=592	Imidazole glycerol phosphate synthase subunit HisH 2 OS=Nitrobacter winogradskyi (strain Nb-255 / ATCC 25391) GN=hisH2 PE=3 SV=1	25.7645	23.8035	23.795	23.6714	28.5087	28.4353	28.3701	28.3363	27.5131	27.5646	27.5609	27.6486	27.7686	27.8711	27.8863	27.8915	Cluster -2	3	38	59.146	0	64.369	6.56019	6.32824e-07
Pg_S2457.10	Ribosomal protein L10 family protein	AT2G40010.1	Q97BN3	AT2G40010.1 | Symbols: | Ribosomal protein L10 family protein | chr2:16708578-16710448 REVERSE LENGTH=317	50S ribosomal protein L10 OS=Thermoplasma volcanium (strain ATCC 51530 / DSM 4299 / JCM 9571 / NBRC 15438 / GSS1) GN=rpl10 PE=3 SV=1	28.1306	28.1661	28.2311	28.3286	29.9094	29.8832	29.8142	29.8573	29.4779	29.3227	29.4884	29.4366	29.4654	29.5147	29.5347	29.5412	Cluster -2	2	59.5	34.02	0	169.92	12.2079	7.31842e-12
Pg_S2325.18	acyl-CoA oxidase 1	AT4G16760.1	P08503	AT4G16760.1 | Symbols: ACX1, ATACX1 | acyl-CoA oxidase 1 | chr4:9424930-9428689 REVERSE LENGTH=664	Medium-chain specific acyl-CoA dehydrogenase, mitochondrial OS=Rattus norvegicus GN=Acadm PE=1 SV=1	26.9475	26.9283	26.9346	26.7618	28.1017	28.1049	28.0277	28.0039	27.5633	27.6165	27.7137	27.554	27.8727	27.9326	27.8445	27.8204	Cluster -2	10	25	74.337	0	62.856	10.1483	4.16339e-10
Pg_S1921.12	dehydratase family	AT3G23940.1	C4ZAW6	AT3G23940.1 | Symbols: | dehydratase family | chr3:8648780-8652323 FORWARD LENGTH=608	Dihydroxy-acid dehydratase OS=Eubacterium rectale (strain ATCC 33656 / VPI 0990) GN=ilvD PE=3 SV=1	26.9284	26.9402	26.7883	26.7887	28.7473	28.8316	28.844	28.4925	28.0604	28.0365	27.9541	28.105	28.1516	28.1561	28.2477	28.2127	Cluster -2	4	37.9	64.126	0	73.88	10.3324	2.88272e-10
Pg_S1771.7	RNA-binding KH domain-containing protein	AT3G04610.1	Q5RB68	AT3G04610.1 | Symbols: FLK | RNA-binding KH domain-containing protein | chr3:1250762-1254272 REVERSE LENGTH=577	Insulin-like growth factor 2 mRNA-binding protein 2 OS=Pongo abelii GN=IGF2BP2 PE=2 SV=1	23.0257	24.0473	24.6021	23.2694	27.0626	27.3535	27.1705	27.1793	25.8835	25.9291	26.0011	26.1875	26.7307	26.4996	26.4901	26.9885	Cluster -2	10	25.4	67.28	0	25.643	6.80156	3.81169e-07
Pg_S1407.21	homolog of bacterial cytokinesis Z-ring protein FTSZ 1-1	AT5G55280.1	P72079	AT5G55280.1 | Symbols: FTSZ1-1, ATFTSZ1-1, CPFTSZ | homolog of bacterial cytokinesis Z-ring protein FTSZ 1-1 | chr5:22420740-22422527 REVERSE LENGTH=433	Cell division protein FtsZ OS=Neisseria gonorrhoeae GN=ftsZ PE=3 SV=1	23.2469	24.6255	23.9736	22.9488	29.0518	29.0928	28.9805	29.0841	27.9507	27.8203	27.9423	28.2581	27.9546	28.2758	28.1193	28.0417	Cluster -2	13	55.7	44.322	0	95.601	8.99205	4.12229e-09
Pg_S0724.32	AMP-dependent synthetase and ligase family protein	AT3G48990.1	Q8EDK3	AT3G48990.1 | Symbols: | AMP-dependent synthetase and ligase family protein | chr3:18159031-18161294 REVERSE LENGTH=514	Acetyl-coenzyme A synthetase OS=Shewanella oneidensis (strain MR-1) GN=acsA PE=3 SV=1	23.3728	23.6602	23.4865	22.7997	26.0126	25.8472	26.0224	26.1957	25.5323	25.7249	25.5019	25.6808	25.9787	26.0672	25.9963	25.7438	Cluster -2	5	14.4	65.4	0	23.586	8.81588	5.84145e-09
Pg_S0121.20	glyoxylate reductase 1	AT3G25530.1	Q94KU2	AT3G25530.1 | Symbols: GHBDH, ATGHBDH, GLYR1, GR1 | glyoxylate reductase 1 | chr3:9271949-9273514 REVERSE LENGTH=289	6-phosphogluconate dehydrogenase, decarboxylating 2, chloroplastic OS=Spinacia oleracea GN=pgdP PE=1 SV=1	23.8275	23.7162	24.2371	24.1607	26.7393	26.8204	26.6659	26.6281	25.5421	25.4803	25.5441	25.395	25.96	25.9798	26.0647	26.1308	Cluster -2	2	68.6	29.459	0	39.412	10.4729	2.19869e-10
Pg_S0288.35	S-adenosyl-L-methionine-dependent methyltransferases superfamily protein	AT1G73600.2	Q6ZIK0	AT1G73600.2 | Symbols: | S-adenosyl-L-methionine-dependent methyltransferases superfamily protein | chr1:27669224-27673400 FORWARD LENGTH=504	Probable tocopherol O-methyltransferase, chloroplastic OS=Oryza sativa subsp. japonica GN=VTE4 PE=2 SV=1	25.5426	23.2698	23.1354	23.444	28.9105	29.1665	29.1249	29.0593	27.2736	27.3669	27.5706	27.26	28.6593	28.6792	28.6281	28.7545	Cluster -2	8	74.1	27.076	0	84.468	7.07374	2.14407e-07
Pg_S5731.3	Ribosomal protein S5 domain 2-like superfamily protein	AT3G49080.1	B0KCN5	AT3G49080.1 | Symbols: | Ribosomal protein S5 domain 2-like superfamily protein | chr3:18194500-18196657 REVERSE LENGTH=430	30S ribosomal protein S9 OS=Thermoanaerobacter pseudethanolicus (strain ATCC 33223 / 39E) GN=rpsI PE=3 SV=1	23.1473	24.2979	23.1613	24.0783	26.3528	26.342	26.3505	26.3911	25.9807	25.8936	25.9289	26.0167	25.8958	25.4223	25.8511	25.7961	Cluster -2	3	36.6	16.604	0	10.436	6.58833	5.98349e-07
Pg_S5274.12	Ribosomal protein L4/L1 family	AT3G09630.1	P14117	AT3G09630.1 | Symbols: | Ribosomal protein L4/L1 family | chr3:2953813-2955444 FORWARD LENGTH=406	60S ribosomal protein L4 (Fragment) OS=Xenopus tropicalis GN=rpl4 PE=3 SV=1	29.8075	29.8432	29.8222	29.8242	30.4476	30.5537	30.518	30.4899	30.3656	30.4004	30.3955	30.3837	30.4073	30.3519	30.3036	30.3439	Cluster -2	6	39.9	45.128	0	156.36	11.1341	5.82286e-11
Pg_S4898.9	Metal-dependent protein hydrolase	AT5G41970.1	Q9PK08	AT5G41970.1 | Symbols: | Metal-dependent protein hydrolase | chr5:16791198-16792961 FORWARD LENGTH=373	UPF0160 protein TC_0665 OS=Chlamydia muridarum (strain MoPn / Nigg) GN=TC_0665 PE=3 SV=2	24.3613	23.7606	24.4102	25.1286	27.6179	27.1322	27.4585	27.7511	26.7771	27.0024	26.8687	26.6775	26.857	26.9883	27.1148	26.8507	Cluster -2	5	29.8	41.946	0	32.315	7.19551	1.66062e-07
Pg_S3338.1	rotamase CYP 4	AT3G62030.2	Q9C566	AT3G62030.2 | Symbols: ROC4 | rotamase CYP 4 | chr3:22973004-22975139 FORWARD LENGTH=313	Peptidyl-prolyl cis-trans isomerase CYP40 OS=Arabidopsis thaliana GN=CYP40 PE=2 SV=1	24.5776	24.9559	23.4237	24.0642	27.8953	27.5298	27.7403	27.9278	27.2978	27.4359	27.3788	27.3304	26.6063	26.6269	26.6823	26.5081	Cluster -2	2	21.9	25.883	0	13.298	7.5322	8.28237e-08
Pg_S3489.6	KH domain-containing protein / zinc finger (CCCH type) family protein	AT3G12130.1	Q9FG30	AT3G12130.1 | Symbols: | KH domain-containing protein / zinc finger (CCCH type) family protein | chr3:3864486-3866406 REVERSE LENGTH=248	Zinc finger CCCH domain-containing protein 52 OS=Arabidopsis thaliana GN=At5g06770 PE=2 SV=1	22.9454	23.6696	22.9629	24.5429	26.7892	27.006	27.0953	27.0873	26.186	26.3225	26.3083	26.2197	26.668	26.7062	26.5081	26.6694	Cluster -2	3	26.7	31.57	0	22.181	7.01084	2.45447e-07
Pg_S2148.3	ketol-acid reductoisomerase	AT3G58610.1	B2IHY4	AT3G58610.1 | Symbols: | ketol-acid reductoisomerase | chr3:21671561-21674639 FORWARD LENGTH=591	Ketol-acid reductoisomerase OS=Beijerinckia indica subsp. indica (strain ATCC 9039 / DSM 1715 / NCIB 8712) GN=ilvC PE=3 SV=1	24.3509	23.2503	23.242	25.7536	28.6088	28.5555	28.42	28.2146	27.6657	27.6795	27.5559	27.6847	27.4183	27.466	27.4645	27.4562	Cluster -2	5	51.6	63.752	0	30.281	5.78767	3.27463e-06
Pg_S1420.4	Peroxidase superfamily protein	AT4G33420.1	Q42580	AT4G33420.1 | Symbols: | Peroxidase superfamily protein | chr4:16084856-16086105 FORWARD LENGTH=325	Peroxidase 21 OS=Arabidopsis thaliana GN=PER21 PE=1 SV=1	23.911	24.8626	23.6923	24.5378	26.7369	26.8655	26.8016	26.876	26.8998	26.9724	26.8401	26.6751	26.1413	26.0948	26.0837	26.0981	Cluster -2	4	42.2	46.833	0	23.839	7.32798	1.25224e-07
Pg_S0582.6	serine hydroxymethyltransferase 3	AT4G32520.1	Q9WZH9	AT4G32520.1 | Symbols: SHM3, AtSHMT3 | serine hydroxymethyltransferase 3 | chr4:15689642-15692334 REVERSE LENGTH=529	Serine hydroxymethyltransferase OS=Thermotoga maritima (strain ATCC 43589 / MSB8 / DSM 3109 / JCM 10099) GN=glyA PE=3 SV=1	23.3804	23.7819	24.1294	24.5651	27.0953	27.0457	27.007	27.4463	26.6798	26.5054	26.6252	26.6968	26.4061	26.445	26.4634	26.2688	Cluster -2	6	30.6	57.615	0	29.235	8.11206	2.46505e-08
Pg_S0505.4	Major facilitator superfamily protein	AT1G52190.1	A8AJB3	AT1G52190.1 | Symbols: | Major facilitator superfamily protein | chr1:19434671-19438673 FORWARD LENGTH=607	Dipeptide permease D OS=Citrobacter koseri (strain ATCC BAA-895 / CDC 4225-83 / SGSC4696) GN=dtpD PE=3 SV=1	23.5402	24.6919	23.4469	24.3139	26.7638	26.9421	27.0085	26.6875	26.7451	26.9103	26.8904	26.8389	26.6855	26.5648	26.5207	26.5459	Cluster -2	2	4	53.224	0	5.9669	7.38716	1.10907e-07
Pg_S0354.7	carbamoyl phosphate synthetase A	AT3G27740.1	Q81VE0	AT3G27740.1 | Symbols: CARA | carbamoyl phosphate synthetase A | chr3:10281470-10283792 REVERSE LENGTH=430	GMP synthase [glutamine-hydrolyzing] OS=Bacillus anthracis GN=guaA PE=3 SV=1	24.3315	23.8676	22.8592	24.3228	27.5973	27.5219	27.478	27.3845	27.227	27.3359	26.5785	27.42	26.4681	26.5445	26.5938	26.4041	Cluster -2	7	28.5	47.143	0	45.914	7.08192	2.10587e-07
Pg_S6553.7	Inorganic H pyrophosphatase family protein	AT1G15690.1	Q93AR9	AT1G15690.1 | Symbols: AVP1, ATAVP3, AVP-3, AtVHP1;1 | Inorganic H pyrophosphatase family protein | chr1:5399115-5402185 FORWARD LENGTH=770	Pyrophosphate-energized proton pump 2 (Fragment) OS=Mycoplana dimorpha GN=hppA2 PE=3 SV=1	23.833	23.3469	24.7222	24.5593	28.5194	28.6558	28.2448	28.0323	28.2014	28.6904	28.4443	28.5078	27.674	27.877	27.5606	27.8165	Cluster -2	3	28.8	80.769	0	32.003	8.55584	1.00846e-08
Pg_S4339.13	nitrite reductase 1	AT2G15620.1	P0A1Y3	AT2G15620.1 | Symbols: NIR1, NIR, ATHNIR | nitrite reductase 1 | chr2:6810552-6812666 FORWARD LENGTH=586	Anaerobic sulfite reductase subunit C OS=Salmonella typhi GN=asrC PE=3 SV=1	24.5923	23.0461	24.5037	24.3611	27.6651	27.4529	27.4893	27.725	28.2326	28.2349	28.3679	28.2289	27.0847	26.6396	26.754	26.7554	Cluster -2	2	20	117.76	0	88.228	7.76184	5.09439e-08
Pg_S3756.11	gamma-glutamyl hydrolase 2	AT1G78680.1	A7YWG4	AT1G78680.1 | Symbols: ATGGH2, GGH2 | gamma-glutamyl hydrolase 2 | chr1:29593933-29596037 FORWARD LENGTH=347	Gamma-glutamyl hydrolase OS=Bos taurus GN=GGH PE=2 SV=1	24.8339	24.8847	24.4169	24.5934	25.3463	25.6115	25.3116	25.6572	25.8511	25.5648	25.5775	25.2951	24.8435	25.6567	25.6557	25.6428	Cluster -2	4	26.8	41.314	0	15.229	2.72273	0.00247842
Pg_S2462.1	disproportionating enzyme	AT5G64860.1	P65337	AT5G64860.1 | Symbols: DPE1 | disproportionating enzyme | chr5:25925373-25928788 REVERSE LENGTH=576	4-alpha-glucanotransferase OS=Mycobacterium bovis (strain ATCC BAA-935 / AF2122/97) GN=malQ PE=3 SV=1	22.6533	24.0994	22.78	24.4486	28.319	28.1569	28.181	28.3043	29.0869	28.9576	28.9701	29.0236	27.5321	27.5315	27.6802	27.6086	Cluster -2	21	49.8	65.351	0	129.75	8.36836	1.45445e-08
Pg_S2266.24	peptidase M20/M25/M40 family protein	AT1G51760.1	Q1WUQ7	AT1G51760.1 | Symbols: IAR3, JR3 | peptidase M20/M25/M40 family protein | chr1:19199562-19201424 FORWARD LENGTH=440	N-acetyldiaminopimelate deacetylase OS=Lactobacillus salivarius (strain UCC118) GN=LSL_0469 PE=3 SV=1	24.0091	24.7161	23.7146	24.4639	26.1942	26.1084	25.9724	25.9283	26.3663	26.3953	26.5154	26.4922	26.3178	26.2733	26.0552	26.1787	Cluster -2	6	17.4	50.094	0	13.865	7.15187	1.82632e-07
Pg_S2123.28	nuclear transport factor 2A	AT1G27310.1	O94260	AT1G27310.1 | Symbols: NTF2A | nuclear transport factor 2A | chr1:9484615-9485790 REVERSE LENGTH=122	Putative G3BP-like protein OS=Schizosaccharomyces pombe (strain 972 / ATCC 24843) GN=nxt3 PE=1 SV=1	24.7393	24.2851	23.4859	23.5972	26.0428	26.4205	26.1797	26.1287	26.5744	26.9957	26.7776	26.5764	26.0203	26.0418	25.86	26.188	Cluster -2	1	36.8	12.71	0	6.4938	6.4028	8.86002e-07
Pg_S2093.27	translationally controlled tumor protein	AT3G16640.1	Q6CTH3	AT3G16640.1 | Symbols: TCTP | translationally controlled tumor protein | chr3:5669709-5670729 REVERSE LENGTH=168	Translationally-controlled tumor protein homolog OS=Kluyveromyces lactis (strain ATCC 8585 / CBS 2359 / DSM 70799 / NBRC 1267 / NRRL Y-1140 / WM37) GN=KLLA0C12716g PE=3 SV=1	23.6815	23.0525	24.2515	24.0092	28.2409	28.3099	28.4557	28.327	28.1188	27.9867	28.5931	28.6752	27.9591	27.954	28.0236	28.0416	Cluster -2	2	39.3	18.917	0	98.667	9.82	7.94969e-10
Pg_S1658.28	ubiquitin activating enzyme 2	AT5G06460.1	A2VE14	AT5G06460.1 | Symbols: ATUBA2, UBA 2 | ubiquitin activating enzyme 2 | chr5:1970239-1974382 FORWARD LENGTH=1077	SUMO-activating enzyme subunit 1 OS=Bos taurus GN=SAE1 PE=2 SV=1	24.2174	23.8687	22.7902	24.8456	27.11	26.8529	27.2057	26.9467	27.532	27.5229	27.5541	27.5336	27.5319	27.3154	27.6236	27.5612	Cluster -2	1	20.7	120.75	0	32.37	6.80875	3.75227e-07
Pg_S2031.3	nucleosome assembly protein 1;2	AT2G19480.1	Q01534	AT2G19480.1 | Symbols: NFA02, NFA2, NAP1;2 | nucleosome assembly protein 1;2 | chr2:8438601-8441040 FORWARD LENGTH=379	Testis-specific Y-encoded protein 1 OS=Homo sapiens GN=TSPY1 PE=1 SV=4	23.1903	25.2298	25.2053	25.9735	27.9247	28.1597	28.036	28.3284	29.0403	28.7858	28.8982	28.9702	28.6055	28.6888	28.7309	28.7438	Cluster -2	2	29.8	43.692	0	78.747	5.67868	4.13703e-06
Pg_S2588.12	ubiquitin-conjugating enzyme 35	AT1G78870.1	Q42551	AT1G78870.1 | Symbols: UBC35, UBC13A | ubiquitin-conjugating enzyme 35 | chr1:29650589-29652203 FORWARD LENGTH=154	SUMO-conjugating enzyme SCE1 OS=Arabidopsis thaliana GN=SCE1 PE=1 SV=1	23.9874	24.2214	23.8114	23.0507	26.221	26.2972	26.1545	26.1452	26.3831	26.2508	26.5178	26.7913	25.8877	25.9379	26.1055	26.2562	Cluster -2	5	51.8	18.88	0	17.974	7.25278	1.47004e-07
Pg_S3018.4	Leucine-rich repeat (LRR) family protein	AT1G33590.1	Q3V1N1	AT1G33590.1 | Symbols: | Leucine-rich repeat (LRR) family protein | chr1:12177788-12179221 FORWARD LENGTH=477	Malignant fibrous histiocytoma-amplified sequence 1 homolog OS=Mus musculus GN=Mfhas1 PE=2 SV=2	22.972	23.2014	24.486	23.902	26.4641	26.3657	26.2151	26.2297	26.225	26.2056	26.4083	26.3413	26.4531	26.5133	26.5131	26.5169	Cluster -2	5	17.9	51.686	0	48.059	6.77316	4.0457e-07
Pg_S0930.40	Ubiquinol-cytochrome C reductase iron-sulfur subunit	AT5G13440.1	Q7NCE1	AT5G13440.1 | Symbols: | Ubiquinol-cytochrome C reductase iron-sulfur subunit | chr5:4308431-4310022 REVERSE LENGTH=274	Cytochrome b6-f complex iron-sulfur subunit OS=Gloeobacter violaceus (strain PCC 7421) GN=petC PE=3 SV=1	24.1021	23.715	23.5925	24.6065	27.3825	27.397	27.5102	27.3939	27.8573	27.4788	27.5643	27.6245	27.3783	27.5176	27.6407	27.5444	Cluster -2	5	23	30.404	0	44.232	9.76476	8.93064e-10
Pg_S0908.18	glutathione S-transferase TAU 8	AT3G09270.1	P81124	AT3G09270.1 | Symbols: ATGSTU8, GSTU8 | glutathione S-transferase TAU 8 | chr3:2848407-2849226 REVERSE LENGTH=224	Probable glutathione transferase (Fragment) OS=Aplysia californica PE=1 SV=1	23.8613	23.837	23.9621	24.2235	26.3866	26.362	26.1608	26.2916	26.3003	26.1763	26.4169	26.0839	25.8171	26.0526	25.8707	25.9345	Cluster -2	2	8.9	50.328	0	12.31	10.5287	1.95161e-10
Pg_S0403.39	PDI-like 1-6	AT3G16110.1	Q67UF5	AT3G16110.1 | Symbols: ATPDIL1-6, ATPDI4, PDI4, PDIL1-6 | PDI-like 1-6 | chr3:5460955-5463666 REVERSE LENGTH=534	Protein disulfide isomerase-like 2-3 OS=Oryza sativa subsp. japonica GN=PDIL2-3 PE=2 SV=1	23.5944	24.339	24.6108	24.9309	26.4059	26.2595	26.3135	26.189	26.7009	26.6232	26.7169	27.0509	26.9013	26.7886	26.8089	26.6786	Cluster -2	9	21	69.934	0	35.481	6.59908	5.85593e-07
Pg_S0167.13	Sugar isomerase (SIS) family protein	AT5G42740.1	Q7S986	AT5G42740.1 | Symbols: | Sugar isomerase (SIS) family protein | chr5:17136080-17140622 FORWARD LENGTH=560	Glucose-6-phosphate isomerase OS=Neurospora crassa (strain ATCC 24698 / 74-OR23-1A / CBS 708.71 / DSM 1257 / FGSC 987) GN=pgi-1 PE=3 SV=1	23.0637	23.9919	23.3912	23.7182	26.0819	25.9468	26.0893	25.8443	26.7012	26.6356	26.6819	26.4744	26.3596	26.5382	26.2349	26.2805	Cluster -2	2	32.1	106.13	0	8.256	9.16579	2.92257e-09
Pg_S0269.4	unknown	unknown	unknown	unknown	unknown	29.7454	29.8746	29.7908	29.6154	30.9133	30.8759	30.8567	30.7785	30.7093	30.773	30.7784	30.7738	30.7124	30.7459	30.7603	30.7078	Cluster -2	2	59.7	24.566	0	142.95	10.4012	2.53055e-10
Pg_S8354.2	translocon outer complex protein 120	AT3G16620.1	O23680	AT3G16620.1 | Symbols: ATTOC120, TOC120 | translocon outer complex protein 120 | chr3:5658469-5661738 REVERSE LENGTH=1089	Translocase of chloroplast 33, chloroplastic OS=Arabidopsis thaliana GN=TOC33 PE=1 SV=1	25.3759	23.9422	23.2569	25.7997	25.4427	25.6511	25.4029	25.6262	25.8226	25.8597	25.9132	25.9113	25.7806	25.948	26.0923	25.9935	Cluster -2	2	9.6	152.75	0	29.568	1.54227	0.0327403
Pg_S7066.1	serine carboxypeptidase-like 17	AT3G12203.1	A7TLB3	AT3G12203.1 | Symbols: scpl17 | serine carboxypeptidase-like 17 | chr3:3891357-3893956 REVERSE LENGTH=437	Pheromone-processing carboxypeptidase KEX1 OS=Vanderwaltozyma polyspora (strain ATCC 22028 / DSM 70294) GN=KEX1 PE=3 SV=1	25.3013	23.4741	22.7684	24.7579	27.4933	27.481	27.6321	27.781	27.2713	27.4054	27.0764	27.3588	27.5328	27.7074	27.7011	27.6564	Cluster -2	2	22.9	53.541	0	40.812	5.42844	7.04965e-06
Pg_S3566.2	unknown	unknown	unknown	unknown	unknown	25.0963	22.5534	23.4441	24.7155	27.7321	27.701	27.7466	27.7255	27.3388	27.3608	27.1779	27.7905	27.6065	27.6915	27.6098	27.5667	Cluster -2	2	55.1	24.796	0	24.253	5.60782	4.78852e-06
Pg_S2683.4	thioredoxin family protein	AT4G04950.1	Q9X2T1	AT4G04950.1 | Symbols: | thioredoxin family protein | chr4:2517882-2519924 REVERSE LENGTH=488	Thioredoxin OS=Pseudomonas aeruginosa (strain ATCC 15692 / PAO1 / 1C / PRS 101 / LMG 12228) GN=trxA PE=3 SV=1	25.0535	23.9114	23.296	23.6665	25.2923	25.2024	25.1978	24.9224	25.9593	26.0217	24.531	25.9361	25.2851	25.4861	25.1336	25.3195	Cluster -2	2	35	36.059	0	19.398	2.28111	0.00656099
Pg_S2676.12	indole-3-butyric acid response 1	AT4G05530.1	Q8JZV9	AT4G05530.1 | Symbols: IBR1, SDRA | indole-3-butyric acid response 1 | chr4:2816462-2818074 FORWARD LENGTH=254	3-hydroxybutyrate dehydrogenase type 2 OS=Mus musculus GN=Bdh2 PE=1 SV=1	26.791	23.2929	23.1889	25.3365	25.9976	25.7148	26.1109	26.1194	26.8895	26.9817	27.05	27.0141	26.8055	26.9945	27.0029	26.8757	Cluster -2	2	29.6	26.913	0	19.872	2.06096	0.0105362
Pg_S4339.6	ARP protein (REF)	AT1G49670.2	P50165	AT1G49670.2 | Symbols: NQR | ARP protein (REF) | chr1:18381591-18386021 REVERSE LENGTH=652	Tropinone reductase homolog OS=Datura stramonium PE=2 SV=1	26.533	26.4101	23.5953	27.3322	27.9502	27.8838	27.8743	27.8781	28.3468	28.4294	28.4593	28.4996	27.9916	28.1493	28.1249	28.204	Cluster -2	11	26.5	68.556	0	70.091	2.33711	0.00578474
Pg_S1014.24	Glycosyl hydrolase family protein	AT5G20950.1	P83344	AT5G20950.1 | Symbols: | Glycosyl hydrolase family protein | chr5:7107609-7110775 REVERSE LENGTH=624	Putative beta-D-xylosidase (Fragment) OS=Prunus persica PE=2 SV=1	27.6006	25.4409	26.2878	26.2424	28.6055	28.4189	28.5857	28.352	28.141	28.3113	28.0655	28.3624	29.0525	28.6063	28.6035	29.1528	Cluster -2	11	20.1	131.61	0	66.095	4.32938	7.48925e-05
Pg_S0682.23	exocyst complex component sec10	AT5G12370.1	Q18406	AT5G12370.1 | Symbols: SEC10 | exocyst complex component sec10 | chr5:4003002-4008445 REVERSE LENGTH=825	Exocyst complex component 5 OS=Caenorhabditis elegans GN=sec-10 PE=3 SV=1	24.4631	22.8419	22.7389	23.9466	24.3605	24.7484	24.6023	24.612	24.4666	24.535	24.245	24.1899	25.3292	25.5385	25.4318	25.3739	Cluster -2	5	7	91.771	0	11.612	3.33072	0.000656075
Pg_S5459.10	RNA-binding (RRM/RBD/RNP motifs) family protein	AT4G14300.1	Q6GLB5	AT4G14300.1 | Symbols: | RNA-binding (RRM/RBD/RNP motifs) family protein | chr4:8231179-8232785 FORWARD LENGTH=411	ELAV-like protein 1 OS=Xenopus tropicalis GN=elavl1 PE=2 SV=1	25.2033	23.3113	23.848	24.589	25.8193	25.8329	25.5347	25.9907	25.7187	25.6168	25.7797	25.4978	26.1931	26.622	26.1773	26.5619	Cluster -2	5	15.7	47.232	0	21.063	3.85526	0.000209911
Pg_S0077.49	alpha/beta-Hydrolases superfamily protein	AT4G16820.1	Q9P979	AT4G16820.1 | Symbols: PLA-I{beta]2 | alpha/beta-Hydrolases superfamily protein | chr4:9467563-9469116 FORWARD LENGTH=517	Feruloyl esterase A OS=Aspergillus awamori GN=faeA PE=1 SV=3	26.4567	24.2882	23.8086	26.5195	27.5282	27.5525	27.5202	27.7037	27.1755	27.1915	27.1417	27.4203	27.6231	27.6269	27.5713	27.5735	Cluster -2	2	28.5	46.964	0	101.23	2.79998	0.00209331
Pg_S0762.64	regulatory particle non-ATPase 13	AT2G26590.1	Q7K2G1	AT2G26590.1 | Symbols: RPN13 | regulatory particle non-ATPase 13 | chr2:11311182-11314717 REVERSE LENGTH=300	Proteasomal ubiquitin receptor ADRM1 homolog OS=Drosophila melanogaster GN=Rpn13 PE=1 SV=1	25.3649	23.834	22.5479	24.1115	25.9111	25.8634	25.9828	26.0981	25.9029	25.7993	25.8348	25.7063	26.1438	26.3101	26.4042	26.368	Cluster -2	4	18.1	35.44	0	27.98	3.34613	0.000634996
Pg_S1400.21	DEAD box RNA helicase family protein	AT3G06480.1	Q49Z29	AT3G06480.1 | Symbols: | DEAD box RNA helicase family protein | chr3:1985697-1989666 REVERSE LENGTH=1088	DEAD-box ATP-dependent RNA helicase CshA OS=Staphylococcus saprophyticus subsp. saprophyticus (strain ATCC 15305 / DSM 20229) GN=cshA PE=3 SV=1	23.3262	24.0394	24.2545	24.37	26.3113	25.0156	25.0219	25.7961	25.1559	25.2904	25.2701	24.9954	25.9368	25.1573	25.4225	25.1906	Cluster -2	2	6.5	123.65	0	22.612	2.93402	0.00156181
Pg_S2847.5	cellulose synthase like E1	AT1G55850.1	Q7PC71	AT1G55850.1 | Symbols: ATCSLE1, CSLE1 | cellulose synthase like E1 | chr1:20876752-20879414 FORWARD LENGTH=729	Cellulose synthase-like protein H2 OS=Oryza sativa subsp. indica GN=CSLH2 PE=3 SV=1	24.3113	25.818	25.7075	25.7621	26.4431	26.447	25.7295	25.9452	26.1871	25.8718	25.8286	25.9066	26.8315	26.576	26.5252	26.8149	Cluster -2	7	11.5	85.688	0	22.417	2.0987	0.00970407
Pg_S7027.6	dynamin-like protein	AT5G42080.1	Q9ZP55	AT5G42080.1 | Symbols: ADL1, ADL1A, AG68, DRP1A, RSW9, DL1 | dynamin-like protein | chr5:16820661-16824536 REVERSE LENGTH=610	Dynamin-related protein 4C OS=Arabidopsis thaliana GN=DRP4C PE=2 SV=1	22.6912	25.9661	24.2515	25.1049	25.735	25.4032	25.8856	25.6384	25.3484	25.1305	24.9988	25.3936	26.3286	26.1895	26.479	25.9255	Cluster -2	3	20.5	68.475	0	25.545	1.49	0.0366382
Pg_S0472.9	ADP-ribosylation factor 3	AT2G24765.1	P49703	AT2G24765.1 | Symbols: ARF3, ARL1, ATARL1 | ADP-ribosylation factor 3 | chr2:10562822-10564961 FORWARD LENGTH=182	ADP-ribosylation factor-like protein 4D OS=Homo sapiens GN=ARL4D PE=1 SV=2	22.3204	25.3172	25.4812	25.4753	25.6849	25.6246	25.6863	25.6249	25.0637	25.6356	25.824	25.7982	27.2148	26.8247	27.0322	27.2035	Cluster -2	5	40.7	20.319	0	21.283	2.05931	0.0105718
Pg_S1347.12	Tetratricopeptide repeat (TPR)-like superfamily protein	AT5G41950.1	unknown	AT5G41950.1 | Symbols: | Tetratricopeptide repeat (TPR)-like superfamily protein | chr5:16785825-16789360 FORWARD LENGTH=565	unknown	22.8135	24.3267	24.097	24.6929	24.3875	24.3904	24.2513	24.7063	24.7227	24.9294	24.289	24.7193	25.9147	25.7089	25.9484	25.9408	Cluster -2	5	14.8	50.989	0	11.428	3.39461	0.000570703
Pg_S3289.2	Ribosomal protein S4	AT5G39850.1	P49214	AT5G39850.1 | Symbols: | Ribosomal protein S4 | chr5:15950053-15951171 FORWARD LENGTH=197	40S ribosomal protein S9 (Fragment) OS=Nicotiana tabacum GN=RPS9 PE=2 SV=1	26.6473	26.8121	26.4901	26.9886	27.3217	27.247	27.3835	27.2493	27.0567	27.1916	27.103	26.8113	27.2922	27.401	27.3538	27.2825	Cluster -2	2	35.5	22.982	0	23.544	3.69534	0.000297631
Pg_S2687.5	heat shock cognate protein 70-1	AT5G02500.1	P0CW13	AT5G02500.1 | Symbols: HSC70-1, HSP70-1, AT-HSC70-1, HSC70 | heat shock cognate protein 70-1 | chr5:554055-556334 REVERSE LENGTH=651	Chaperone protein DnaK OS=Methanosarcina mazei (strain ATCC BAA-159 / DSM 3647 / Goe1 / Go1 / JCM 11833 / OCM 88) GN=dnaK PE=3 SV=1	22.065	24.327	24.2503	25.8011	26.3275	26.3839	26.3355	25.8529	24.162	23.5483	25.6171	25.8683	26.426	26.3544	26.2766	26.2473	Cluster -2	2	65.1	70.817	0	23.569	1.7853	0.0191621
Pg_S2113.5	chorismate synthase, putative / 5-enolpyruvylshikimate-3-phosphate phospholyase, putative	AT1G48850.1	B1KKS1	AT1G48850.1 | Symbols: EMB1144 | chorismate synthase, putative / 5-enolpyruvylshikimate-3-phosphate phospholyase, putative | chr1:18065154-18067956 REVERSE LENGTH=436	Chorismate synthase OS=Shewanella woodyi (strain ATCC 51908 / MS32) GN=aroC PE=3 SV=1	22.8755	24.5584	21.845	23.8964	26.0059	25.8901	26.0513	23.273	24.4855	23.6859	25.2124	25.443	27.3803	27.0139	27.3312	26.9864	Cluster -2	4	45.5	47.64	0	13.451	2.95903	0.00147714
Pg_S0313.6	acetyl-CoA carboxylase carboxyl transferase subunit beta	ATCG00500.1	Q1WUR6	ATCG00500.1 | Symbols: ACCD | acetyl-CoA carboxylase carboxyl transferase subunit beta | chrC:57075-58541 FORWARD LENGTH=488	Acetyl-coenzyme A carboxylase carboxyl transferase subunit beta OS=Lactobacillus salivarius (strain UCC118) GN=accD PE=3 SV=1	25.8889	25.9266	26.0745	26.5665	27.2878	27.3399	27.3192	27.1219	26.7007	26.7501	26.9672	26.6983	27.3216	27.2628	27.302	27.3224	Cluster -2	7	41.6	27.066	0	50.919	5.77844	3.33805e-06
Pg_S0326.10	alpha/beta-Hydrolases superfamily protein	AT4G16820.1	Q9P979	AT4G16820.1 | Symbols: PLA-I{beta]2 | alpha/beta-Hydrolases superfamily protein | chr4:9467563-9469116 FORWARD LENGTH=517	Feruloyl esterase A OS=Aspergillus awamori GN=faeA PE=1 SV=3	22.8284	22.5235	23.3612	24.5932	25.7583	25.8727	25.4276	25.1546	25.4159	22.4234	25.2568	23.3845	25.5685	25.7189	25.7836	25.772	Cluster -2	2	16.8	30.714	0	10.977	2.22171	0.00747074
Pg_S8321.3	TCP-1/cpn60 chaperonin family protein	AT3G18190.1	Q6NF74	AT3G18190.1 | Symbols: | TCP-1/cpn60 chaperonin family protein | chr3:6232226-6233836 FORWARD LENGTH=536	60 kDa chaperonin 2 OS=Corynebacterium diphtheriae (strain ATCC 700971 / NCTC 13129 / Biotype gravis) GN=groL2 PE=3 SV=1	28.702	28.8616	28.8566	29.0927	29.536	29.545	29.6075	29.3068	29.2391	29.1929	29.2823	29.1752	29.5436	29.6287	29.6748	29.6204	Cluster -2	17	54.1	60.353	0	127.28	5.52143	5.76501e-06
Pg_S6554.5	RAN GTPase activating protein 1	AT3G63130.1	Q86W25	AT3G63130.1 | Symbols: RANGAP1, ATRANGAP1 | RAN GTPase activating protein 1 | chr3:23325108-23326715 FORWARD LENGTH=535	NACHT, LRR and PYD domains-containing protein 13 OS=Homo sapiens GN=NLRP13 PE=2 SV=2	27.044	27.1069	26.9556	27.2685	27.5399	27.381	27.4488	27.5649	27.5519	27.4352	27.4025	27.6484	28.0013	28.1766	28.0961	27.9903	Cluster -2	7	31.6	55.306	0	55.147	6.64225	5.35349e-07
Pg_S5009.4	chorismate synthase, putative / 5-enolpyruvylshikimate-3-phosphate phospholyase, putative	AT1G48850.1	B1KKS1	AT1G48850.1 | Symbols: EMB1144 | chorismate synthase, putative / 5-enolpyruvylshikimate-3-phosphate phospholyase, putative | chr1:18065154-18067956 REVERSE LENGTH=436	Chorismate synthase OS=Shewanella woodyi (strain ATCC 51908 / MS32) GN=aroC PE=3 SV=1	27.6479	27.917	27.9499	27.9191	28.5577	28.6529	28.625	28.3789	28.3228	28.3221	28.2595	28.0598	29.0188	29.1065	29.0784	29.0219	Cluster -2	4	50.9	47.65	0	100.14	7.42228	1.0277e-07
Pg_S3978.3	calreticulin 3	AT1G08450.1	P27825	AT1G08450.1 | Symbols: CRT3, PSL1, EBS2, AtCRT3 | calreticulin 3 | chr1:2668008-2671800 REVERSE LENGTH=424	Calnexin homolog OS=Saccharomyces cerevisiae (strain ATCC 204508 / S288c) GN=CNE1 PE=1 SV=1	27.0132	27.2567	27.7046	27.8574	28.633	28.7183	28.5938	28.5659	28.3139	28.3692	28.3278	28.3078	29.6783	29.7453	29.8779	29.7538	Cluster -2	4	46.3	50.495	0	157.47	7.7096	5.66503e-08
Pg_S5056.1	vacuolar proton ATPase A3	AT4G39080.1	Q9HM61	AT4G39080.1 | Symbols: VHA-A3 | vacuolar proton ATPase A3 | chr4:18209513-18214752 FORWARD LENGTH=821	V-type ATP synthase subunit I OS=Thermoplasma acidophilum (strain ATCC 25905 / DSM 1728 / JCM 9062 / NBRC 15155 / AMRC-C165) GN=atpI PE=3 SV=1	23.4726	24.5378	23.0816	23.4076	24.8394	24.8073	24.6605	24.1318	24.8766	24.8202	22.979	25.1173	25.3808	25.382	25.8948	25.6776	Cluster -2	3	10.2	92.388	0	14.877	2.17715	0.0082355
Pg_S1615.11	glucan synthase-like 8	AT2G36850.1	Q9SFU6	AT2G36850.1 | Symbols: ATGSL08, GSL8, GSL08, ATGSL8, CHOR | glucan synthase-like 8 | chr2:15454935-15469666 REVERSE LENGTH=1904	Callose synthase 9 OS=Arabidopsis thaliana GN=CALS9 PE=2 SV=2	24.1675	24.4648	24.0275	24.5943	25.1095	25.0209	24.9245	24.9429	24.9055	24.8688	24.5501	24.7245	25.5154	25.5323	25.6899	25.6079	Cluster -2	1	6	129.76	0	18.221	5.89552	2.58684e-06
Pg_S3554.22	unknown	unknown	unknown	unknown	unknown	23.6277	24.3381	23.9458	24.2981	25.0328	25.1622	25.2176	25.2701	25.1934	25.138	23.6544	24.6126	25.8786	25.4307	25.8152	25.7647	Cluster -2	2	5.5	83.147	0	8.0669	3.22574	0.000824183
Pg_S1171.28	Heat shock protein 70 (Hsp 70) family protein	AT3G09440.1	Q83MH5	AT3G09440.1 | Symbols: | Heat shock protein 70 (Hsp 70) family protein | chr3:2903434-2905632 REVERSE LENGTH=649	Chaperone protein DnaK OS=Shigella flexneri GN=dnaK PE=3 SV=1	28.1084	28.2128	28.0975	28.2079	28.4197	28.5611	28.55	28.2289	28.4207	28.5387	28.3612	28.2943	28.9435	28.9523	29.0534	29.0092	Cluster -2	16	35.4	99.134	0	100.52	6.2288	1.26675e-06
Pg_S0213.51	D-3-phosphoglycerate dehydrogenase	AT4G34200.1	A1A9T1	AT4G34200.1 | Symbols: EDA9 | D-3-phosphoglycerate dehydrogenase | chr4:16374041-16376561 REVERSE LENGTH=603	Glyoxylate/hydroxypyruvate reductase A OS=Escherichia coli O1:K1 / APEC GN=ghrA PE=3 SV=2	25.9868	26.2473	25.8117	26.5751	28.1874	28.4004	28.394	28.6414	27.829	27.5117	27.4973	27.4489	29.9675	29.9283	30.1873	30.07	Cluster -2	1	24	124.23	0	181.89	10.0664	4.87998e-10
Pg_S0318.35	TCP-1/cpn60 chaperonin family protein	AT3G18190.1	Q6NF74	AT3G18190.1 | Symbols: | TCP-1/cpn60 chaperonin family protein | chr3:6232226-6233836 FORWARD LENGTH=536	60 kDa chaperonin 2 OS=Corynebacterium diphtheriae (strain ATCC 700971 / NCTC 13129 / Biotype gravis) GN=groL2 PE=3 SV=1	27.7143	27.8771	27.8764	27.9079	28.4037	28.5162	28.5287	28.6716	28.3458	28.3816	28.3258	28.2694	28.9294	28.9079	29.0619	28.986	Cluster -2	3	38.5	59.06	0	81.433	8.7095	7.2801e-09
Pg_S4691.7	UDP-Glycosyltransferase superfamily protein	AT4G01070.1	P34317	AT4G01070.1 | Symbols: GT72B1, UGT72B1 | UDP-Glycosyltransferase superfamily protein | chr4:461858-463300 REVERSE LENGTH=480	Putative UDP-glucuronosyltransferase ugt-60 OS=Caenorhabditis elegans GN=ugt-60 PE=3 SV=2	23.765	24.0878	25.4073	25.0969	24.9259	25.4637	25.1896	24.9301	23.3098	23.9572	22.0036	23.4478	24.3844	24.6662	22.3459	24.5101	Cluster -2	5	17.1	41.522	0	13.391	1.56789	0.0309625
Pg_S1358.13	Bacterial sec-independent translocation protein mttA/Hcf106	AT5G28750.1	Q94G16	AT5G28750.1 | Symbols: | Bacterial sec-independent translocation protein mttA/Hcf106 | chr5:10784142-10785677 REVERSE LENGTH=147	Sec-independent protein translocase protein TATB, chloroplastic OS=Pisum sativum GN=TATB PE=1 SV=1	23.9213	23.2634	24.6226	23.2205	24.8128	24.2097	23.9603	24.6342	23.0259	24.023	21.5595	23.1462	22.4251	23.4762	22.1333	23.5934	Cluster -2	2	16.4	28.473	0	17.501	1.40139	0.0444612
Pg_S3277.15	Tyrosyl-tRNA synthetase, class Ib, bacterial/mitochondrial	AT3G02660.1	B8D726	AT3G02660.1 | Symbols: emb2768 | Tyrosyl-tRNA synthetase, class Ib, bacterial/mitochondrial | chr3:570221-571756 REVERSE LENGTH=511	Tyrosine--tRNA ligase OS=Buchnera aphidicola subsp. Acyrthosiphon pisum (strain Tuc7) GN=tyrS PE=3 SV=1	23.8417	24.5718	23.1473	24.0768	25.5554	25.4494	25.4416	25.6986	23.7831	23.9161	21.0969	22.8775	23.1828	23.9325	22.5558	23.8678	Cluster -2	2	8.3	53.294	0	6.8708	2.55393	0.00359242
Pg_S8223.1	GDSL-like Lipase/Acylhydrolase superfamily protein	AT1G29660.1	P10978	AT1G29660.1 | Symbols: | GDSL-like Lipase/Acylhydrolase superfamily protein | chr1:10371955-10373624 FORWARD LENGTH=364	Retrovirus-related Pol polyprotein from transposon TNT 1-94 OS=Nicotiana tabacum PE=2 SV=1	24.4332	24.4248	24.4423	24.2406	24.6686	24.9686	24.8276	24.792	23.099	23.0235	22.7228	22.8679	23.7999	22.4343	22.8666	21.8289	Cluster -2	2	4.6	60.305	0	8.3894	4.57204	4.43014e-05
Pg_S7857.4	germin 3	AT5G20630.1	P09351	AT5G20630.1 | Symbols: GLP3, GLP3A, GLP3B, ATGER3, GER3 | germin 3 | chr5:6975315-6975950 REVERSE LENGTH=211	Spherulin-1B OS=Physarum polycephalum PE=2 SV=1	26.988	27.3476	27.3867	27.5207	27.974	28.1047	28.0226	28.11	23.6949	23.0148	24.0167	22.8618	22.7412	23.5656	22.869	22.7515	Cluster -2	2	32.9	21.802	0	24.645	9.95086	6.10302e-10
Pg_S7439.1	Ribonuclease T2 family protein	AT1G14210.1	Q7SID5	AT1G14210.1 | Symbols: | Ribonuclease T2 family protein | chr1:4856902-4857941 REVERSE LENGTH=247	Ribonuclease S-F11 OS=Nicotiana alata PE=1 SV=1	32.5063	32.5075	32.5334	32.5945	30.7458	30.8018	30.755	30.7227	23.9795	23.779	22.3103	23.4981	25.4702	25.0335	25.9602	25.056	Cluster -2	17	67.4	47.667	0	323.31	11.5562	2.51583e-11
Pg_S6951.2	3-ketoacyl-acyl carrier protein synthase I	AT5G46290.3	Q83E37	AT5G46290.3 | Symbols: KASI | 3-ketoacyl-acyl carrier protein synthase I | chr5:18774439-18776629 REVERSE LENGTH=489	3-oxoacyl-[acyl-carrier-protein] synthase 2 OS=Coxiella burnetii (strain RSA 493 / Nine Mile phase I) GN=fabF PE=1 SV=1	25.9338	25.9052	26.0347	26.2502	25.5797	25.4076	25.4229	24.0936	23.8828	23.4972	22.8371	23.0908	23.5134	22.6543	23.1141	23.152	Cluster -2	4	7.1	141.85	0	12.237	5.68846	4.05313e-06
Pg_S5162.5	carotenoid cleavage dioxygenase 1	AT3G63520.1	Q5RF16	AT3G63520.1 | Symbols: CCD1, ATCCD1, ATNCED1, NCED1 | carotenoid cleavage dioxygenase 1 | chr3:23452940-23455896 FORWARD LENGTH=538	Beta,beta-carotene 9',10'-oxygenase OS=Pongo abelii GN=BCO2 PE=2 SV=1	27.47	27.2953	27.4524	27.3815	27.6716	27.6863	27.7727	27.4172	26.7676	26.9205	26.7858	26.6938	26.9289	26.8153	26.7183	26.984	Cluster -2	9	23.4	61.113	0	29.075	6.3968	8.96251e-07
Pg_S4800.3	elongation factor family protein	AT2G31060.3	Q2LTN3	AT2G31060.3 | Symbols: | elongation factor family protein | chr2:13213496-13218544 REVERSE LENGTH=671	Elongation factor 4 OS=Syntrophus aciditrophicus (strain SB) GN=lepA PE=3 SV=1	24.755	24.6954	26.0096	23.8677	25.4549	25.0178	24.9061	25.0248	22.2211	23.1412	23.7094	22.5725	23.1104	22.7056	23.239	24.4481	Cluster -2	2	3.7	89.435	0	5.1674	2.87855	0.00175749
Pg_S4344.7	NAD(P)-binding Rossmann-fold superfamily protein	AT1G30620.1	Q31FG4	AT1G30620.1 | Symbols: HSR8, MUR4, UXE1 | NAD(P)-binding Rossmann-fold superfamily protein | chr1:10855496-10857970 FORWARD LENGTH=419	ADP-L-glycero-D-manno-heptose-6-epimerase OS=Thiomicrospira crunogena (strain XCL-2) GN=hldD PE=3 SV=1	28.3154	28.4087	28.6087	28.489	28.9458	28.8752	28.8134	28.6736	26.3872	26.679	26.4342	26.5124	27.3819	27.3181	27.4032	27.4335	Cluster -2	3	31.4	33.486	0	46.918	11.3854	3.49385e-11
Pg_S3959.1	unknown	unknown	unknown	unknown	unknown	24.1832	24.2025	24.4733	24.1908	24.7348	23.8751	24.1578	24.4198	23.7569	23.4182	23.7242	23.5979	24.1231	23.8669	23.9094	23.712	Cluster -2	3	2.9	207.28	0	8.6854	2.44387	0.0045999
Pg_S1669.9	lipoamide dehydrogenase 1	AT3G16950.2	P50970	AT3G16950.2 | Symbols: LPD1, ptlpd1 | lipoamide dehydrogenase 1 | chr3:5786508-5790383 REVERSE LENGTH=623	Dihydrolipoyl dehydrogenase OS=Zymomonas mobilis subsp. mobilis (strain ATCC 31821 / ZM4 / CP4) GN=lpd PE=3 SV=3	28.8309	28.9323	28.7989	28.6612	28.5808	28.6907	28.5349	28.5185	27.9909	27.999	28.0709	28.0197	28.1711	28.1044	28.2485	28.1005	Cluster -2	7	38.1	60.442	0	94.634	7.67324	6.11676e-08
Pg_S1416.47	D-aminoacid aminotransferase-like PLP-dependent enzymes superfamily protein	AT5G27410.1	Q8W0Z7	AT5G27410.1 | Symbols: | D-aminoacid aminotransferase-like PLP-dependent enzymes superfamily protein | chr5:9678821-9682468 FORWARD LENGTH=559	Branched-chain-amino-acid aminotransferase-like protein 1 OS=Arabidopsis thaliana GN=At3g05190 PE=2 SV=1	23.9366	24.0807	24.5484	24.4799	24.3823	24.7128	24.2959	24.2603	22.825	23.7688	22.3913	23.6595	22.395	23.2839	24.1632	23.679	Cluster -2	2	5.3	36.887	0	4.1823	1.88837	0.0153541
Pg_S1205.5	catalase 2	AT4G35090.1	Q73WB6	AT4G35090.1 | Symbols: CAT2 | catalase 2 | chr4:16700937-16703215 REVERSE LENGTH=492	Catalase-related peroxidase OS=Mycobacterium paratuberculosis (strain ATCC BAA-968 / K-10) GN=MAP_2744c PE=1 SV=1	29.8967	29.2068	28.8345	28.7493	30.5149	30.8492	30.8731	30.3735	23.2339	22.6389	22.6665	22.7675	23.2588	23.7932	23.1983	23.3813	Cluster -2	2	54.9	56.798	0	186.35	12.2572	6.66967e-12
Pg_S0981.39	casein lytic proteinase B3	AT5G15450.1	O15885	AT5G15450.1 | Symbols: APG6, CLPB3, CLPB-P | casein lytic proteinase B3 | chr5:5014399-5018255 REVERSE LENGTH=968	Heat shock protein 100 (Fragment) OS=Trypanosoma cruzi GN=HSP100 PE=3 SV=1	28.1859	28.4363	28.4309	28.3734	28.4792	28.343	28.2839	28.3366	26.1585	25.7877	25.351	25.4068	25.683	26.2802	26.5381	26.834	Cluster -2	6	24.6	110.27	0	92.938	7.36478	1.16012e-07
Pg_S0765.9	unknown	unknown	unknown	unknown	unknown	26.6278	26.5324	26.7691	26.7723	26.9474	26.6728	26.1539	26.4516	22.4041	22.1338	22.7187	23.9388	24.502	25.336	23.1552	22.0014	Cluster -2	7	22.6	57.12	0	26.203	4.36047	7.0067e-05
Pg_S0690.3	translocon at the inner envelope membrane of chloroplasts 55-II	AT2G24820.1	Q17938	AT2G24820.1 | Symbols: TIC55-II | translocon at the inner envelope membrane of chloroplasts 55-II | chr2:10575038-10576829 FORWARD LENGTH=539	Cholesterol desaturase daf-36 OS=Caenorhabditis elegans GN=daf-36 PE=1 SV=2	26.6356	26.6943	26.6084	26.3314	25.8991	25.8155	26.155	25.7535	23.595	22.3175	23.3772	22.2139	22.4179	23.3965	24.3092	24.3407	Cluster -2	8	16.1	68.382	0	18.402	5.56033	5.29218e-06
Pg_S0397.4	Ribosomal protein S19e family protein	AT5G61170.1	Q8SQS8	AT5G61170.1 | Symbols: | Ribosomal protein S19e family protein | chr5:24611158-24612202 FORWARD LENGTH=143	40S ribosomal protein S19 OS=Encephalitozoon cuniculi (strain GB-M1) GN=RPS19 PE=1 SV=1	28.4826	28.5315	28.3612	28.51	28.7491	28.6004	28.5689	28.5663	27.8312	28.0334	27.9667	27.9098	27.9596	28.0104	28.0408	27.8279	Cluster -2	1	28.7	15.975	0	45.625	7.03457	2.33209e-07
Pg_S0603.1	Ribosomal protein L6 family protein	AT1G74060.1	P47991	AT1G74060.1 | Symbols: | Ribosomal protein L6 family protein | chr1:27850033-27851299 REVERSE LENGTH=233	60S ribosomal protein L6 OS=Caenorhabditis elegans GN=rpl-6 PE=1 SV=1	28.3971	28.4103	28.3546	28.4039	28.4493	28.4825	28.6515	28.4117	27.8221	27.6468	27.6211	27.9266	27.7628	27.8812	27.8822	27.7087	Cluster -2	2	47.2	25.721	0	43.351	6.7196	4.52413e-07
Pg_S8075.2	phosphoglucose isomerase 1	AT4G24620.1	Q48N88	AT4G24620.1 | Symbols: PGI1, PGI | phosphoglucose isomerase 1 | chr4:12708972-12712610 REVERSE LENGTH=613	Glucose-6-phosphate isomerase OS=Pseudomonas syringae pv. phaseolicola (strain 1448A / Race 6) GN=pgi PE=3 SV=1	27.4609	27.4051	27.7418	27.7567	27.9661	28.1406	27.8646	27.9977	27.2263	27.087	27.1603	27.2253	26.8007	27.0318	26.8231	26.8937	Cluster -2	7	39.3	33.465	0	24.043	6.77485	4.03331e-07
Pg_S8001.3	alpha/beta-Hydrolases superfamily protein	AT4G16820.1	Q9P979	AT4G16820.1 | Symbols: PLA-I{beta]2 | alpha/beta-Hydrolases superfamily protein | chr4:9467563-9469116 FORWARD LENGTH=517	Feruloyl esterase A OS=Aspergillus awamori GN=faeA PE=1 SV=3	24.0087	24.6176	24.219	23.5606	24.7845	24.39	24.8401	24.6202	24.8115	22.778	22.7785	22.4433	21.9328	23.0169	22.5806	23.1338	Cluster -2	4	17.1	47.86	0	6.198	2.35564	0.0055479
Pg_S7488.3	accelerated cell death 2 (ACD2)	AT4G37000.1	Q9MTQ6	AT4G37000.1 | Symbols: ACD2, ATRCCR | accelerated cell death 2 (ACD2) | chr4:17442627-17443762 FORWARD LENGTH=319	Red chlorophyll catabolite reductase (Fragment) OS=Hordeum vulgare GN=rccR PE=2 SV=1	25.4266	25.544	25.9314	25.779	26.2069	26.5096	26.3862	26.558	25.4528	24.9967	25.0174	25.142	24.8208	24.8413	24.6874	24.4434	Cluster -2	7	23.6	36.676	0	24.054	6.61942	5.60989e-07
Pg_S6850.3	cytochrome P450, family 72, subfamily A, polypeptide 15	AT3G14690.1	Q6WKZ0	AT3G14690.1 | Symbols: CYP72A15 | cytochrome P450, family 72, subfamily A, polypeptide 15 | chr3:4937410-4939310 FORWARD LENGTH=512	Cytochrome P450 71D94 OS=Mentha gracilis GN=CYP71D94 PE=2 SV=1	26.3977	26.1641	26.5921	26.3931	26.3074	26.2734	26.6686	26.3434	25.6528	25.7848	25.4953	25.571	25.3831	25.8417	23.3123	24.9455	Cluster -2	3	18.4	46.068	0	22.629	2.15244	0.00867672
Pg_S5955.2	glutathione transferase lambda 2	AT3G55040.1	Q9H4Y5	AT3G55040.1 | Symbols: GSTL2 | glutathione transferase lambda 2 | chr3:20398718-20400305 REVERSE LENGTH=292	Glutathione S-transferase omega-2 OS=Homo sapiens GN=GSTO2 PE=1 SV=1	23.9927	22.7953	24.8329	24.2063	24.1481	24.4899	24.5165	24.4563	22.8738	22.5596	22.1559	24.0174	22.8844	22.7882	22.2094	21.5546	Cluster -2	3	13.8	34.588	0	4.3572	2.46154	0.00441853
Pg_S5883.1	proline-rich family protein	AT5G62640.3	unknown	AT5G62640.3 | Symbols: | proline-rich family protein | chr5:25149584-25152351 REVERSE LENGTH=540	unknown	23.8317	24.8335	23.9704	24.234	24.5624	24.5118	24.4271	24.63	23.1551	22.6511	22.6851	22.7264	21.8423	21.6072	21.9546	21.6304	Cluster -2	2	24.6	14.264	0	13.011	7.83031	4.41888e-08
Pg_S5290.3	unknown	unknown	unknown	unknown	unknown	31.6427	31.6864	31.5617	31.6956	32.4585	32.5628	32.4224	32.3886	31.6054	31.6537	31.513	31.6198	30.6579	30.5949	30.5259	30.5874	Cluster -2	2	40	22.517	0	323.31	12.546	3.7758e-12
Pg_S5018.1	40s ribosomal protein SA B	AT3G04770.1	A8A8X0	AT3G04770.1 | Symbols: RPSAb | 40s ribosomal protein SA B | chr3:1309465-1310846 REVERSE LENGTH=332	30S ribosomal protein S2 OS=Ignicoccus hospitalis (strain KIN4/I / DSM 18386 / JCM 14125) GN=rps2 PE=3 SV=1	29.0124	29.0565	29.1415	28.9583	29.3418	29.4147	29.3854	29.4219	28.9019	28.9019	28.9226	28.9391	28.5742	28.478	28.5976	28.5765	Cluster -2	4	41	33.047	0	108.33	9.52517	1.42278e-09
Pg_S4477.9	Ribosomal S17 family protein	AT5G04800.1	Q8SSF9	AT5G04800.1 | Symbols: | Ribosomal S17 family protein | chr5:1389217-1389642 FORWARD LENGTH=141	40S ribosomal protein S17 OS=Encephalitozoon cuniculi (strain GB-M1) GN=RPS17 PE=1 SV=1	26.4131	26.2738	26.0245	26.1624	26.7304	26.1892	26.1612	26.2268	25.9012	25.7879	25.9952	25.79	25.5182	25.5858	25.5077	25.323	Cluster -2	3	31.5	16.775	0	14.204	4.11594	0.000119393
Pg_S2440.12	methyl-CPG-binding domain 11	AT3G15790.1	Q9XI36	AT3G15790.1 | Symbols: MBD11, ATMBD11 | methyl-CPG-binding domain 11 | chr3:5343209-5344386 FORWARD LENGTH=254	Methyl-CpG-binding domain-containing protein 10 OS=Arabidopsis thaliana GN=MBD10 PE=1 SV=1	28.6683	28.9179	28.2686	28.5534	28.5905	28.6924	28.7142	28.6974	28.2515	28.2113	28.3624	28.2099	27.4409	27.5186	27.4638	27.6382	Cluster -2	3	27.3	36.56	0	116.05	6.36183	9.62481e-07
Pg_S2000.6	Hyaluronan / mRNA binding family	AT4G17520.1	unknown	AT4G17520.1 | Symbols: | Hyaluronan / mRNA binding family | chr4:9771496-9773313 FORWARD LENGTH=360	unknown	26.8731	26.9282	27.0036	26.8126	26.6947	26.8949	26.9196	26.8982	26.2238	26.1389	26.2818	26.2712	25.7728	25.6877	25.7285	25.3761	Cluster -2	5	30.1	38.878	0	41.814	8.13365	2.35853e-08
Pg_S5960.10	ankyrin repeat-containing 2B	AT2G17390.1	Q9W0T5	AT2G17390.1 | Symbols: AKR2B | ankyrin repeat-containing 2B | chr2:7555870-7557743 FORWARD LENGTH=344	Transient receptor potential channel pyrexia OS=Drosophila melanogaster GN=pyx PE=2 SV=2	28.7697	28.7603	28.7937	28.8837	28.8195	28.8554	28.8736	28.8747	28.5973	28.6023	28.5869	28.5829	28.2714	28.2658	28.2507	28.2198	Cluster -2	11	51.2	37.057	0	112.01	10.5419	1.90614e-10
Pg_S1713.18	Ribosomal protein S19 family protein	AT5G09510.1	B8E1D7	AT5G09510.1 | Symbols: | Ribosomal protein S19 family protein | chr5:2955698-2956554 REVERSE LENGTH=152	30S ribosomal protein S19 OS=Dictyoglomus turgidum (strain Z-1310 / DSM 6724) GN=rpsS PE=3 SV=1	27.6096	27.4713	27.4912	27.3714	28.0858	28.1607	28.1121	27.9306	27.3123	27.147	27.0762	27.4064	26.5438	26.4887	26.4525	26.3357	Cluster -2	1	32.8	21.864	0	23.035	8.94532	4.5336e-09
Pg_S1029.26	RNA-binding (RRM/RBD/RNP motifs) family protein	AT4G14300.1	Q6GLB5	AT4G14300.1 | Symbols: | RNA-binding (RRM/RBD/RNP motifs) family protein | chr4:8231179-8232785 FORWARD LENGTH=411	ELAV-like protein 1 OS=Xenopus tropicalis GN=elavl1 PE=2 SV=1	23.6247	24.8607	24.3003	23.7018	24.4214	24.4593	23.8755	23.552	23.7558	23.6921	23.6505	23.9815	23.2001	23.1621	23.2282	23.294	Cluster -2	1	28.4	25.31	0	19.556	1.74652	0.0208513
Pg_S0614.61	Histone superfamily protein	AT5G59970.1	P80738	AT5G59970.1 | Symbols: | Histone superfamily protein | chr5:24146352-24146663 REVERSE LENGTH=103	Histone H4 (Fragment) OS=Blepharisma japonicum PE=1 SV=2	30.3941	30.4244	30.3581	30.3483	30.5133	30.537	30.5992	30.7424	30.0645	30.0112	30.0723	30.032	28.3457	28.3482	28.3253	25.8972	Cluster -2	2	17.6	14.995	0	27.44	4.09182	0.000125804
Pg_S2624.3	Mitochondrial import inner membrane translocase subunit Tim17/Tim22/Tim23 family protein	AT5G51150.1	Q9CYV5	AT5G51150.1 | Symbols: | Mitochondrial import inner membrane translocase subunit Tim17/Tim22/Tim23 family protein | chr5:20789034-20791495 FORWARD LENGTH=531	Transmembrane protein 135 OS=Mus musculus GN=Tmem135 PE=2 SV=1	24.9253	25.0316	25.1459	25.2333	25.6423	25.7016	25.6531	25.4989	24.4651	24.4822	24.5142	23.5913	22.4117	24.0361	23.7417	22.9898	Cluster -2	1	11.1	21.492	0	6.9338	4.39221	6.52742e-05
Pg_S0252.38	chaperonin 20	AT5G20720.1	Q5LAF5	AT5G20720.1 | Symbols: CPN20, CPN10, CHCPN10, ATCPN21, CPN21 | chaperonin 20 | chr5:7015015-7016354 FORWARD LENGTH=253	10 kDa chaperonin OS=Bacteroides fragilis (strain ATCC 25285 / NCTC 9343) GN=groS PE=3 SV=1	27.3422	27.4467	27.4641	27.7106	28.58	28.7127	28.7412	28.3953	27.2758	27.3253	27.396	27.2863	26.9318	26.9844	23.7062	26.9277	Cluster -2	2	47.1	27.049	0	106.02	2.03668	0.0111003
Pg_S2867.1	Ribosomal protein S8 family protein	AT5G59850.1	Q11HR6	AT5G59850.1 | Symbols: | Ribosomal protein S8 family protein | chr5:24112499-24113084 REVERSE LENGTH=130	30S ribosomal protein S8 OS=Chelativorans sp. (strain BNC1) GN=rpsH PE=3 SV=1	29.1569	29.193	29.1748	29.2341	29.6401	29.487	29.5654	29.4318	28.687	28.6247	28.7105	28.7026	28.4434	28.5989	28.4804	28.4567	Cluster -2	6	50.8	14.83	0	33.631	10.0824	4.7312e-10
Pg_S0077.34	S-adenosyl-L-methionine-dependent methyltransferases superfamily protein	AT1G73600.2	Q6ZIK0	AT1G73600.2 | Symbols: | S-adenosyl-L-methionine-dependent methyltransferases superfamily protein | chr1:27669224-27673400 FORWARD LENGTH=504	Probable tocopherol O-methyltransferase, chloroplastic OS=Oryza sativa subsp. japonica GN=VTE4 PE=2 SV=1	23.7233	24.624	24.7767	23.0999	24.8675	24.7125	24.7541	24.6412	23.8658	23.0408	22.8616	22.6294	22.9208	23.1954	22.6813	22.7878	Cluster -2	4	18.1	36.945	0	8.0913	3.23261	0.000811643
Pg_S1815.10	Aldolase-type TIM barrel family protein	AT5G13420.1	Q255E4	AT5G13420.1 | Symbols: | Aldolase-type TIM barrel family protein | chr5:4302080-4304212 REVERSE LENGTH=438	Transaldolase OS=Chlamydophila felis (strain Fe/C-56) GN=tal PE=3 SV=1	23.014	25.5417	22.8969	22.9585	25.362	25.2049	25.1632	25.2809	23.0826	23.9539	22.757	23.5621	22.8171	22.7779	24.6604	24.1769	Cluster -2	4	26.4	28.846	0	13.944	1.54637	0.032484
Pg_S1348.26	translocon at the inner envelope membrane of chloroplasts 110	AT1G06950.1	O24303	AT1G06950.1 | Symbols: ATTIC110, TIC110 | translocon at the inner envelope membrane of chloroplasts 110 | chr1:2130303-2135563 REVERSE LENGTH=1016	Protein TIC110, chloroplastic OS=Pisum sativum GN=TIC110 PE=1 SV=1	24.007	24.2972	23.7174	23.7664	24.2317	26.8717	27.1826	27.2407	22.977	24.0111	23.175	23.1947	23.2434	22.7564	26.0531	26.1636	Cluster -2	3	34.8	93.822	0	19.923	1.72732	0.0217326
Pg_S1302.2	AMP-dependent synthetase and ligase family protein	AT3G48990.1	Q8EDK3	AT3G48990.1 | Symbols: | AMP-dependent synthetase and ligase family protein | chr3:18159031-18161294 REVERSE LENGTH=514	Acetyl-coenzyme A synthetase OS=Shewanella oneidensis (strain MR-1) GN=acsA PE=3 SV=1	24.5001	24.5571	23.5555	23.1621	24.3028	24.3864	24.2673	24.3699	22.8214	23.7791	23.0439	22.9173	22.4366	22.8213	24.2712	23.4366	Cluster -2	2	6.8	61.458	0	10.525	1.44802	0.0401677
Pg_S1051.9	Cyclophilin-like peptidyl-prolyl cis-trans isomerase family protein	AT4G33060.1	P52015	AT4G33060.1 | Symbols: | Cyclophilin-like peptidyl-prolyl cis-trans isomerase family protein | chr4:15948535-15951954 FORWARD LENGTH=504	Peptidyl-prolyl cis-trans isomerase 7 OS=Caenorhabditis elegans GN=cyn-7 PE=1 SV=2	24.0155	24.2397	25.1567	23.5706	26.9381	27.1227	27.4345	27.1701	23.1388	23.6849	22.296	23.4851	20.4564	23.895	26.3209	23.2285	Cluster -2	8	24.6	50.142	0	35.117	2.47252	0.00431195
Pg_S0615.12	Translation elongation factor EF1B, gamma chain	AT1G09640.1	Q9VG96	AT1G09640.1 | Symbols: | Translation elongation factor EF1B, gamma chain | chr1:3120162-3122152 FORWARD LENGTH=414	Glutathione S-transferase D4 OS=Drosophila melanogaster GN=GstD4 PE=1 SV=1	24.2693	23.6985	23.124	22.9166	26.441	26.5626	26.6602	27.0053	23.6936	23.7414	22.5939	23.1757	23.858	22.7827	26.2739	26.1504	Cluster -2	2	59	38.592	0	11.469	2.92241	0.00159821
Pg_S0905.32	chloroplast signal recognition particle component (CAO)	AT2G47450.1	Q8LSQ2	AT2G47450.1 | Symbols: CAO, CPSRP43 | chloroplast signal recognition particle component (CAO) | chr2:19472781-19473902 FORWARD LENGTH=373	Probable signal recognition particle 43 kDa protein, chloroplastic OS=Oryza sativa subsp. japonica GN=Os03g0131900 PE=2 SV=1	24.1319	24.2156	23.4371	23.6163	26.0672	26.033	26.1019	26.3404	22.6115	23.8756	23.7452	22.7192	23.2759	23.4894	24.9683	24.1381	Cluster -2	4	23.5	40.099	0	11.169	4.40309	6.3837e-05
Pg_S1214.40	NAD(P)-binding Rossmann-fold superfamily protein	AT1G30620.1	Q31FG4	AT1G30620.1 | Symbols: HSR8, MUR4, UXE1 | NAD(P)-binding Rossmann-fold superfamily protein | chr1:10855496-10857970 FORWARD LENGTH=419	ADP-L-glycero-D-manno-heptose-6-epimerase OS=Thiomicrospira crunogena (strain XCL-2) GN=hldD PE=3 SV=1	25.3634	24.8532	24.0768	24.3645	26.5421	26.6527	26.6968	26.2907	22.7485	21.1291	22.6378	23.9989	22.4921	23.2759	25.4394	25.7496	Cluster -2	5	15.6	45.953	0	17.891	2.79387	0.00211929
Pg_S0833.9	4-hydroxy-3-methylbut-2-enyl diphosphate synthase	AT5G60600.1	B7VJT8	AT5G60600.1 | Symbols: GCPE, ISPG, CSB3, CLB4, HDS | 4-hydroxy-3-methylbut-2-enyl diphosphate synthase | chr5:24359447-24363274 FORWARD LENGTH=741	4-hydroxy-3-methylbut-2-en-1-yl diphosphate synthase OS=Vibrio splendidus (strain LGP32) GN=ispG PE=3 SV=1	24.6042	23.5599	24.83	24.8573	25.266	26.94	25.8481	26.8188	22.6302	24.3821	23.3795	24.3669	22.6917	25.2831	25.3703	25.2303	Cluster -2	5	32.6	82.038	0	18.845	1.8158	0.0179568
Pg_S2159.2	light harvesting complex of photosystem II 5	AT4G10340.1	Q39709	AT4G10340.1 | Symbols: LHCB5 | light harvesting complex of photosystem II 5 | chr4:6408200-6409496 FORWARD LENGTH=280	Fucoxanthin-chlorophyll a-c binding protein, chloroplastic OS=Isochrysis galbana GN=FCP PE=1 SV=1	23.4017	23.5042	23.923	23.4548	22.7726	29.9452	29.8967	29.8408	22.0685	21.6419	23.6884	24.254	25.6545	25.887	25.8403	25.8056	Cluster -2	1	51.4	30.541	0	7.1653	2.06457	0.0104534
Pg_S3511.14	septum site-determining protein (MIND)	AT5G24020.1	Q9FXT4	AT5G24020.1 | Symbols: MIND, ARC11, ATMIND1 | septum site-determining protein (MIND) | chr5:8116731-8117711 FORWARD LENGTH=326	Alpha-galactosidase OS=Oryza sativa subsp. japonica GN=Os10g0493600 PE=1 SV=1	23.8811	24.3247	23.8975	24.1776	24.5216	24.5486	24.5568	24.9464	22.28	23.6602	23.7144	22.5316	22.4353	23.83	23.7813	23.5154	Cluster -2	3	13.5	37.324	0	8.6835	2.37507	0.00532376
Pg_S1881.25	FAD/NAD(P)-binding oxidoreductase family protein	AT1G58440.1	P52019	AT1G58440.1 | Symbols: XF1, SQE1 | FAD/NAD(P)-binding oxidoreductase family protein | chr1:21714094-21717246 REVERSE LENGTH=531	Squalene monooxygenase OS=Mus musculus GN=Sqle PE=2 SV=1	23.7361	23.2668	24.2621	23.5112	24.5688	25.4249	24.4077	24.6567	22.1471	23.4383	24.1367	22.3532	23.2264	23.9523	23.5379	22.9556	Cluster -2	3	11.6	63.65	0	4.2987	2.05707	0.0106223
Pg_S6586.8	Lysyl-tRNA synthetase, class II	AT3G13490.1	A1T047	AT3G13490.1 | Symbols: OVA5, ATKRS-2 | Lysyl-tRNA synthetase, class II | chr3:4395984-4399302 REVERSE LENGTH=602	Lysine--tRNA ligase OS=Psychromonas ingrahamii (strain 37) GN=lysS PE=3 SV=1	24.0637	23.092	23.5075	23.9927	24.7526	24.6432	24.6404	24.2895	21.8385	22.699	24.0298	23.1481	22.7116	24.1229	22.8428	23.6592	Cluster -2	4	8	67.225	0	8.7929	1.79574	0.0187375
Pg_S0932.2	ABC transporter family protein	AT5G60790.1	Q217B2	AT5G60790.1 | Symbols: ATGCN1, GCN1 | ABC transporter family protein | chr5:24453760-24455767 REVERSE LENGTH=595	Hemin import ATP-binding protein HmuV OS=Rhodopseudomonas palustris (strain BisB18) GN=hmuV PE=3 SV=1	24.6521	24.2848	24.132	22.881	23.9703	24.6449	24.3701	24.4529	22.8038	24.166	23.8516	22.8191	22.7297	23.4721	23.2916	22.9584	Cluster -2	2	4.6	85.518	0	9.7579	1.44457	0.0404574
Pg_S4052.8	thiaminC	AT2G29630.2	B6JI86	AT2G29630.2 | Symbols: THIC | thiaminC | chr2:12667395-12669569 FORWARD LENGTH=644	Phosphomethylpyrimidine synthase OS=Oligotropha carboxidovorans (strain ATCC 49405 / DSM 1227 / OM5) GN=thiC PE=3 SV=1	24.3222	23.7546	24.2082	24.2193	24.8226	24.7508	24.9672	24.8421	21.9429	24.079	21.9853	23.6086	22.4359	23.4099	23.0048	23.9112	Cluster -2	3	7	93.741	0	6.776	2.36915	0.00538977
Pg_S1954.1	Protein of unknown function (DUF3411)	AT5G12470.1	unknown	AT5G12470.1 | Symbols: | Protein of unknown function (DUF3411) | chr5:4044950-4047290 REVERSE LENGTH=386	unknown	24.7268	24.5593	24.15	24.2224	27.0727	26.988	27.2969	26.8694	22.382	25.1165	24.4747	25.175	24.2301	24.492	24.5473	24.987	Cluster -2	7	15.8	62.32	0	27.006	3.57767	0.000383796
Pg_S2668.9	Phototropic-responsive NPH3 family protein	AT4G31820.1	Q9M2W8	AT4G31820.1 | Symbols: ENP, NPY1, MAB4 | Phototropic-responsive NPH3 family protein | chr4:15390788-15393627 REVERSE LENGTH=571	BTB/POZ domain-containing protein At3g49900 OS=Arabidopsis thaliana GN=At3g49900 PE=2 SV=1	24.3301	23.7848	23.1367	24.4717	25.3458	25.3292	25.3055	24.8149	20.9392	23.1044	23.9839	23.3955	23.0406	23.4434	22.9576	24.1746	Cluster -2	2	4.1	68.397	0	6.3703	2.11095	0.00947394
Pg_S4388.20	unknown	unknown	unknown	unknown	unknown	24.7903	24.3083	23.7104	24.1805	27.2938	27.2692	27.1852	27.398	21.592	23.9955	22.9178	23.476	22.6562	23.2013	22.9096	23.5075	Cluster -2	6	20.9	47.673	0	27.852	6.11967	1.60365e-06
Pg_S1613.8	pentatricopeptide (PPR) repeat-containing protein	AT5G46580.1	Q9FZ19	AT5G46580.1 | Symbols: | pentatricopeptide (PPR) repeat-containing protein | chr5:18897510-18899645 REVERSE LENGTH=711	Putative pentatricopeptide repeat-containing protein At1g02420 OS=Arabidopsis thaliana GN=At1g02420 PE=3 SV=2	23.839	23.8625	23.8342	22.9243	24.0491	23.7773	23.8598	23.6293	21.3964	23.0852	22.6847	23.6757	22.2841	23.081	22.4704	22.4044	Cluster -2	3	5.2	80.198	0	11.094	1.74359	0.0209839
Pg_S0930.19	Seryl-tRNA synthetase	AT1G11870.2	Q5HJY7	AT1G11870.2 | Symbols: ATSRS, SRS | Seryl-tRNA synthetase | chr1:4003895-4006556 FORWARD LENGTH=514	Serine--tRNA ligase OS=Staphylococcus aureus (strain COL) GN=serS PE=3 SV=1	24.1428	24.679	23.671	24.1594	25.8862	25.2721	25.472	25.7878	22.23	24.5235	22.4921	23.1037	23.274	22.8827	22.5447	24.5357	Cluster -2	3	9.2	55.737	0	24.647	2.87971	0.00175439
Pg_S4782.2	tRNA synthetase class I (I, L, M and V) family protein	AT4G10320.1	B8GQR1	AT4G10320.1 | Symbols: | tRNA synthetase class I (I, L, M and V) family protein | chr4:6397526-6404509 REVERSE LENGTH=1190	Isoleucine--tRNA ligase OS=Thioalkalivibrio sulfidiphilus (strain HL-EbGR7) GN=ileS PE=3 SV=1	23.2131	23.8612	23.7868	23.553	26.06	25.5753	25.7741	25.7112	21.3481	24.4455	23.3373	24.0179	22.82	24.2001	23.6248	23.5696	Cluster -2	5	8.1	107.02	0	16.557	2.71254	0.00253386
Pg_S6391.1	pentatricopeptide (PPR) repeat-containing protein	AT5G46580.1	Q9FZ19	AT5G46580.1 | Symbols: | pentatricopeptide (PPR) repeat-containing protein | chr5:18897510-18899645 REVERSE LENGTH=711	Putative pentatricopeptide repeat-containing protein At1g02420 OS=Arabidopsis thaliana GN=At1g02420 PE=3 SV=2	23.8736	24.0307	23.9999	23.2426	24.9068	24.8498	25.037	24.7447	22.2643	23.5099	23.769	23.9377	23.489	23.1632	23.238	23.4482	Cluster -2	2	5.4	72.436	0	13.226	3.05932	0.00118079
Pg_S5970.7	endoribonuclease L-PSP family protein	AT3G20390.1	P0AEB8	AT3G20390.1 | Symbols: | endoribonuclease L-PSP family protein | chr3:7110227-7111695 REVERSE LENGTH=187	RutC family protein YoaB OS=Escherichia coli O6:H1 (strain CFT073 / ATCC 700928 / UPEC) GN=yoaB PE=3 SV=1	23.5089	24.1181	24.4691	24.3219	25.015	25.3899	25.2211	24.1141	23.0747	23.4529	23.2213	23.2465	23.7298	24.5072	24.1849	22.2288	Cluster -2	2	29.3	23.195	0	6.2683	1.86008	0.0162824
Pg_S3169.2	ribonuclease 1	AT2G02990.1	Q02933	AT2G02990.1 | Symbols: RNS1, ATRNS1 | ribonuclease 1 | chr2:873714-874667 FORWARD LENGTH=230	Ribonuclease T2-like OS=Saccharomyces cerevisiae (strain ATCC 204508 / S288c) GN=RNY1 PE=1 SV=1	23.4962	23.4459	23.521	24.5516	26.6709	26.627	26.6047	23.6838	22.2018	24.3941	24.7976	23.3007	23.4293	23.4176	22.8181	22.9877	Cluster -2	2	11.8	24.775	0	9.9183	2.01073	0.0117395
Pg_S1214.17	unknown	unknown	unknown	unknown	unknown	23.6952	24.0477	23.9225	22.6652	24.8532	24.6282	24.733	24.8185	22.5472	24.1145	22.606	23.0371	22.6782	24.7361	23.1671	22.6974	Cluster -2	2	15.2	37.444	0	8.1463	1.67798	0.0242114
Pg_S0188.8	cofactor assembly of complex C	AT3G26710.1	unknown	AT3G26710.1 | Symbols: CCB1 | cofactor assembly of complex C | chr3:9813550-9814606 FORWARD LENGTH=267	unknown	23.6961	23.6976	24.2698	24.6565	24.9553	24.7439	24.9361	24.8021	23.0041	22.5618	22.9412	24.5846	23.0055	24.3658	23.0273	23.3338	Cluster -2	2	8.7	20.31	0	10.394	1.95595	0.0132135
Pg_S0302.12	Haloacid dehalogenase-like hydrolase (HAD) superfamily protein	AT4G26190.1	unknown	AT4G26190.1 | Symbols: | Haloacid dehalogenase-like hydrolase (HAD) superfamily protein | chr4:13262473-13266282 REVERSE LENGTH=1057	unknown	23.5098	23.8969	24.8306	23.8439	26.5888	26.6798	26.6141	23.1688	23.2016	24.172	23.024	22.445	23.0758	24.0275	22.9673	23.9356	Cluster -2	5	25.9	33.915	0	42.045	1.76377	0.020112
Pg_S5036.8	RNA-binding (RRM/RBD/RNP motifs) family protein with retrovirus zinc finger-like domain	AT1G60650.1	Q99729	AT1G60650.1 | Symbols: | RNA-binding (RRM/RBD/RNP motifs) family protein with retrovirus zinc finger-like domain | chr1:22340089-22342148 FORWARD LENGTH=292	Heterogeneous nuclear ribonucleoprotein A/B OS=Homo sapiens GN=HNRNPAB PE=1 SV=2	25.9606	25.4215	25.4569	25.482	26.0009	25.9635	26.1265	26.3485	25.5141	25.545	25.3732	25.9402	25.8063	25.3392	25.2814	25.5852	Cluster -2	3	15.4	25.09	0	18.681	1.97088	0.0127934
Pg_S2317.22	Aldolase-type TIM barrel family protein	AT5G13420.1	Q255E4	AT5G13420.1 | Symbols: | Aldolase-type TIM barrel family protein | chr5:4302080-4304212 REVERSE LENGTH=438	Transaldolase OS=Chlamydophila felis (strain Fe/C-56) GN=tal PE=3 SV=1	23.4185	24.5606	24.0282	22.6716	25.8284	26.2057	25.9582	25.8911	23.94	23.6469	23.4024	23.8725	23.6095	23.739	22.5337	23.5987	Cluster -2	3	14.3	46.036	0	19.409	4.41994	6.16132e-05
Pg_S2283.1	translocon at the outer membrane of chloroplasts 64-III	AT3G17970.1	Q9FR37	AT3G17970.1 | Symbols: atToc64-III, TOC64-III | translocon at the outer membrane of chloroplasts 64-III | chr3:6148030-6151794 FORWARD LENGTH=589	Amidase 1 OS=Arabidopsis thaliana GN=AMI1 PE=1 SV=1	24.2433	23.8379	24.1511	23.0237	25.8974	25.9292	25.803	25.8194	25.1186	25.2418	22.7073	25.1272	23.3914	23.7512	22.2042	23.7252	Cluster -2	4	10	64.196	0	15.008	2.58746	0.00333437
Pg_S1734.2	NAD(P)-linked oxidoreductase superfamily protein	AT1G59960.1	P78736	AT1G59960.1 | Symbols: | NAD(P)-linked oxidoreductase superfamily protein | chr1:22071410-22073067 REVERSE LENGTH=326	NAD(P)H-dependent D-xylose reductase OS=Pachysolen tannophilus GN=XYL1 PE=1 SV=1	24.3056	22.7859	23.1596	23.5093	25.9278	25.9086	25.8477	25.8607	24.3195	23.6972	23.7351	23.2036	23.6578	22.4891	23.2221	23.036	Cluster -2	2	32.3	28.692	0	8.5952	5.07411	1.49599e-05
Pg_S1357.4	outer envelope protein of 80 kDa	AT5G19620.1	Q5IZC8	AT5G19620.1 | Symbols: EMB213, OEP80, ATOEP80, TOC75 | outer envelope protein of 80 kDa | chr5:6623323-6627641 FORWARD LENGTH=732	Protein TOC75-4, chloroplastic OS=Arabidopsis thaliana GN=TOC75-4 PE=2 SV=1	24.2442	23.8267	23.4966	23.3201	24.3503	24.5995	24.6892	24.643	23.8797	23.8274	23.8799	23.9252	23.8117	23.7125	23.7473	23.8391	Cluster -2	5	8.8	71.38	0	10.001	3.33356	0.000652682
Pg_S0310.2	phenylalanyl-tRNA synthetase, putative / phenylalanine--tRNA ligase, putative	AT4G39280.1	B2G885	AT4G39280.1 | Symbols: | phenylalanyl-tRNA synthetase, putative / phenylalanine--tRNA ligase, putative | chr4:18281641-18284831 REVERSE LENGTH=485	Phenylalanine--tRNA ligase alpha subunit OS=Lactobacillus reuteri (strain JCM 1112) GN=pheS PE=3 SV=1	23.8752	23.4359	23.2417	23.5893	25.0331	25.2119	25.5362	25.2322	23.6304	24.9009	23.0997	24.7703	23.4247	24.847	23.2581	23.184	Cluster -2	4	12.8	56.474	0	13.945	2.12352	0.00922321
Pg_S0109.34	anthranilate synthase 2	AT2G29690.1	P32483	AT2G29690.1 | Symbols: ASA2, ATHANSYNAB | anthranilate synthase 2 | chr2:12693899-12696791 FORWARD LENGTH=621	Para-aminobenzoate synthase OS=Streptomyces griseus GN=pab PE=3 SV=1	24.5202	24.4652	24.1201	23.4677	25.3792	25.3595	24.8523	26.1612	24.2329	24.1841	24.2683	24.1181	24.2153	24.3673	24.1371	24.39	Cluster -2	3	11.2	65.191	0	11.155	3.06805	0.00115784
Pg_S0189.7	Mitochondrial import inner membrane translocase subunit Tim17/Tim22/Tim23 family protein	AT5G51150.1	Q9CYV5	AT5G51150.1 | Symbols: | Mitochondrial import inner membrane translocase subunit Tim17/Tim22/Tim23 family protein | chr5:20789034-20791495 FORWARD LENGTH=531	Transmembrane protein 135 OS=Mus musculus GN=Tmem135 PE=2 SV=1	26.7988	26.7327	26.5955	26.4639	28.1068	28.1484	28.0906	28.0445	26.8765	26.72	26.5845	26.9717	26.772	26.7633	26.6794	26.6745	Cluster -2	2	21	29.482	0	42.106	8.81364	5.8639e-09
Pg_S6380.2	dormancy-associated protein-like 1	AT1G28330.5	Q05349	AT1G28330.5 | Symbols: DYL1 | dormancy-associated protein-like 1 | chr1:9934252-9935216 REVERSE LENGTH=159	Auxin-repressed 12.5 kDa protein OS=Fragaria ananassa PE=2 SV=1	27.6876	27.8791	27.8698	27.8954	28.8585	28.9853	28.9396	28.7442	28	28.0759	27.9601	27.9636	27.5591	27.6344	27.5802	27.5084	Cluster -2	5	85	13.046	0	60.051	9.73931	9.36983e-10
Pg_S3264.2	Peptidase M1 family protein	AT1G63770.5	Q2GY21	AT1G63770.5 | Symbols: | Peptidase M1 family protein | chr1:23657791-23664243 REVERSE LENGTH=1013	Leukotriene A-4 hydrolase homolog OS=Chaetomium globosum (strain ATCC 6205 / CBS 148.51 / DSM 1962 / NBRC 6347 / NRRL 1970) GN=CHGG_07133 PE=3 SV=1	31.5712	31.572	31.4706	31.5708	32.1658	32.1873	32.1998	32.1163	31.8062	31.8627	31.7756	31.7561	31.5554	31.6166	31.5996	31.5673	Cluster -2	23	72.5	109.22	0	323.31	9.63857	1.14815e-09
Pg_S2758.4	glycyl-tRNA synthetase / glycine--tRNA ligase	AT1G29880.1	B9E6V6	AT1G29880.1 | Symbols: | glycyl-tRNA synthetase / glycine--tRNA ligase | chr1:10459662-10462781 REVERSE LENGTH=729	Glycine--tRNA ligase OS=Macrococcus caseolyticus (strain JCSC5402) GN=glyQS PE=3 SV=1	25.646	25.846	25.6466	25.9652	26.54	26.6615	26.2667	26.2773	26.1253	25.9539	26.0358	25.9741	25.7274	25.9597	25.8457	25.7961	Cluster -2	2	11.3	80.882	0	22.91	4.02926	0.000144061
Pg_S2289.21	UDP-Glycosyltransferase superfamily protein	AT4G01070.1	P34317	AT4G01070.1 | Symbols: GT72B1, UGT72B1 | UDP-Glycosyltransferase superfamily protein | chr4:461858-463300 REVERSE LENGTH=480	Putative UDP-glucuronosyltransferase ugt-60 OS=Caenorhabditis elegans GN=ugt-60 PE=3 SV=2	22.9627	25.7839	23.2156	24.8677	27.9734	27.8984	27.0269	26.8781	26.047	25.9815	23.5523	25.8477	22.2182	23.305	23.5555	23.2728	Cluster -2	1	36.3	23.721	0	7.9082	3.49986	0.000452968
Pg_S6489.2	alpha/beta-Hydrolases superfamily protein	AT4G16820.1	Q9P979	AT4G16820.1 | Symbols: PLA-I{beta]2 | alpha/beta-Hydrolases superfamily protein | chr4:9467563-9469116 FORWARD LENGTH=517	Feruloyl esterase A OS=Aspergillus awamori GN=faeA PE=1 SV=3	23.4172	23.487	23.7413	24.2134	25.6423	25.7228	24.8988	24.897	24.0842	24.0023	24.0527	23.9785	23.1343	23.9609	23.8626	24.0335	Cluster -2	3	16.5	41.774	0	15.774	3.93012	0.000179095
Pg_S0649.2	unknown	unknown	unknown	unknown	unknown	27.0816	26.8443	27.4006	27.4823	28.6524	28.635	28.384	28.5726	27.3758	27.6527	27.595	27.4449	27.2647	27.115	27.1046	27.2414	Cluster -2	6	66.2	14.545	0	46.653	6.50122	7.16888e-07
Pg_S7810.1	Histone superfamily protein	AT5G59970.1	P80738	AT5G59970.1 | Symbols: | Histone superfamily protein | chr5:24146352-24146663 REVERSE LENGTH=103	Histone H4 (Fragment) OS=Blepharisma japonicum PE=1 SV=2	23.7481	24.2466	23.2888	23.6745	27.124	27.2521	26.598	26.6651	25.1601	23.4597	25.4949	25.6317	23.2728	24.3852	23.2871	23.7638	Cluster -2	1	23.5	15.268	0	22.517	4.60023	4.17356e-05
Pg_S2618.5	alfin-like 1	AT5G05610.1	Q5XEM9	AT5G05610.1 | Symbols: AL1 | alfin-like 1 | chr5:1677331-1678942 REVERSE LENGTH=241	PHD finger protein ALFIN-LIKE 5 OS=Arabidopsis thaliana GN=AL5 PE=2 SV=1	23.9472	23.8974	23.9346	24.2034	24.7329	24.6107	24.4664	24.5247	24.0654	24.1275	24.0641	24.0281	24.0286	23.9183	24.0837	23.9704	Cluster -2	1	7.7	26.688	0	11.654	5.28612	9.49618e-06
Pg_S0093.7	glutathione reductase	AT3G54660.1	A2RIB7	AT3G54660.1 | Symbols: GR, EMB2360, ATGR2 | glutathione reductase | chr3:20230356-20233100 REVERSE LENGTH=565	NADH oxidase OS=Lactococcus lactis subsp. cremoris (strain MG1363) GN=noxE PE=1 SV=1	28.2595	28.5051	28.1525	28.0783	29.5669	29.4653	29.5912	29.5945	28.7102	28.8978	28.7533	28.8239	27.9972	28.0175	28.1789	28.0243	Cluster -2	4	37.8	60.818	0	105.18	8.84661	5.49321e-09
Pg_S4503.7	Glycogen/starch synthases, ADP-glucose type	AT5G24300.1	Q935Y7	AT5G24300.1 | Symbols: SSI1, SSI, ATSS1 | Glycogen/starch synthases, ADP-glucose type | chr5:8266934-8270860 FORWARD LENGTH=652	Glycogen synthase OS=Synechococcus elongatus (strain PCC 7942) GN=glgA PE=3 SV=3	24.1829	23.6205	23.793	24.1985	24.6521	24.4892	24.3727	24.9454	23.766	23.44	23.7183	23.6293	23.8618	23.7619	23.7851	23.8639	Cluster -2	2	13.3	164.51	0	9.6736	3.92401	0.00018144
Pg_S4009.5	thylakoid lumen 15.0 kDa protein	AT5G52970.1	Q9LVV5	AT5G52970.1 | Symbols: | thylakoid lumen 15.0 kDa protein | chr5:21479620-21481018 FORWARD LENGTH=223	Thylakoid lumenal 15.0 kDa protein 2, chloroplastic OS=Arabidopsis thaliana GN=At5g52970 PE=1 SV=2	26.0599	23.5944	25.2954	23.6755	28.0447	26.0025	26.0743	28.0432	23.6145	23.656	23.7203	23.7566	23.992	23.8166	23.4477	23.4838	Cluster -2	5	23.9	25.816	0	17.709	3.47114	0.00048203
Pg_S3099.10	high mobility group A	AT1G14900.1	unknown	AT1G14900.1 | Symbols: HMGA | high mobility group A | chr1:5138665-5139353 REVERSE LENGTH=204	unknown	24.3437	24.4331	24.5635	24.8614	26.4281	26.003	26.1036	26.6461	23.309	22.5286	21.9086	23.6922	23.397	23.1673	22.3471	22.7881	Cluster -2	3	21.5	19.209	0	7.5245	5.9616	2.25182e-06
Pg_S2793.5	seed imbibition 2	AT3G57520.1	Q93XK2	AT3G57520.1 | Symbols: AtSIP2, SIP2 | seed imbibition 2 | chr3:21288982-21292694 REVERSE LENGTH=773	Stachyose synthase OS=Pisum sativum GN=STS1 PE=1 SV=1	24.1121	23.6981	23.5043	25.4271	25.4554	23.2139	25.7137	25.4379	22.6435	22.8573	22.8237	24.2798	23.4521	22.5688	22.975	22.7464	Cluster -2	4	6.5	87.367	0	11.223	1.74731	0.0208216
Pg_S0799.1	RmlC-like cupins superfamily protein	AT1G50590.1	Q9CKD7	AT1G50590.1 | Symbols: | RmlC-like cupins superfamily protein | chr1:18732378-18734053 REVERSE LENGTH=310	Putative quercetin 2,3-dioxygenase PM1685 OS=Pasteurella multocida (strain Pm70) GN=PM1685 PE=3 SV=1	24.8737	23.1944	24.7044	23.373	25.8684	23.4535	26.1347	25.8642	22.8876	23.7129	22.2831	23.4456	22.6208	23.7698	22.7163	22.7641	Cluster -2	2	28.1	10.925	0	6.6612	2.08743	0.00993826
Pg_S0283.8	Rubredoxin-like superfamily protein	AT1G80230.1	P19536	AT1G80230.1 | Symbols: | Rubredoxin-like superfamily protein | chr1:30169784-30170999 REVERSE LENGTH=171	Cytochrome c oxidase subunit 5B, mitochondrial OS=Mus musculus GN=Cox5b PE=1 SV=1	24.6066	23.9056	23.5497	24.3767	27.4458	24.313	24.7332	27.4504	22.2782	22.8293	22.5633	22.9081	23.2425	23.0584	23.0814	23.0082	Cluster -2	2	21.5	22.462	0	36.913	3.03452	0.00124727
Pg_S0155.15	ATP-dependent caseinolytic (Clp) protease/crotonase family protein	AT3G24360.1	Q28FR6	AT3G24360.1 | Symbols: | ATP-dependent caseinolytic (Clp) protease/crotonase family protein | chr3:8839832-8842799 REVERSE LENGTH=418	3-hydroxyisobutyryl-CoA hydrolase, mitochondrial OS=Xenopus tropicalis GN=hibch PE=2 SV=1	24.5614	24.1296	24.1211	23.8914	25.738	23.9916	25.9307	25.8194	22.6384	23.1509	23.7296	23.5348	22.6524	22.3964	23.7876	23.3054	Cluster -2	1	13.2	35.791	0	9.7845	3.12494	0.00102478
Pg_S0204.40	P-loop containing nucleoside triphosphate hydrolases superfamily protein	AT1G08410.1	A8GM60	AT1G08410.1 | Symbols: | P-loop containing nucleoside triphosphate hydrolases superfamily protein | chr1:2646307-2649106 FORWARD LENGTH=589	Probable GTP-binding protein EngB OS=Rickettsia akari (strain Hartford) GN=engB PE=3 SV=1	25.143	23.8716	24.7522	24.2839	25.2742	25.234	25.298	25.5776	23.3389	22.9953	23.9129	23.5656	23.5548	23.6377	23.8505	24.2528	Cluster -2	3	7	100.3	0	12.317	4.15416	0.000109809
Pg_S5895.4	alpha/beta-Hydrolases superfamily protein	AT4G16820.1	Q9P979	AT4G16820.1 | Symbols: PLA-I{beta]2 | alpha/beta-Hydrolases superfamily protein | chr4:9467563-9469116 FORWARD LENGTH=517	Feruloyl esterase A OS=Aspergillus awamori GN=faeA PE=1 SV=3	23.4708	23.2437	24.7626	23.2634	26.0464	25.9409	23.5484	25.7808	23.4244	23.3988	23.1351	23.3374	23.6097	22.6834	22.6626	23.3588	Cluster -2	5	19.3	44.113	0	21.196	2.3618	0.00547696
Pg_S6578.5	NAD(P)-linked oxidoreductase superfamily protein	AT1G59960.1	P78736	AT1G59960.1 | Symbols: | NAD(P)-linked oxidoreductase superfamily protein | chr1:22071410-22073067 REVERSE LENGTH=326	NAD(P)H-dependent D-xylose reductase OS=Pachysolen tannophilus GN=XYL1 PE=1 SV=1	23.3565	23.7087	24.1135	24.4245	27.5606	26.9281	26.9366	27.7787	24.5057	22.655	23.3532	22.168	23.5737	22.5512	23.1076	24.5369	Cluster -2	7	31.1	41.602	0	37.816	4.94208	1.99088e-05
Pg_S4619.4	unknown	unknown	unknown	unknown	unknown	23.5223	23.12	25.2005	23.1171	26.0663	25.3207	25.3223	25.4807	24.1137	22.34	23.8713	22.9438	23.144	23.2693	23.7264	23.1722	Cluster -2	3	11.6	37.056	0	10.858	2.79982	0.00209331
Pg_S8267.2	unknown	unknown	unknown	unknown	unknown	24.3397	24.8278	25.4591	23.6431	28.3395	28.9803	29.0711	28.4325	24.3461	22.2798	23.7948	23.164	22.5518	23.9585	23.3359	24.1625	Cluster -2	4	19.4	17.083	0	16.438	6.27751	1.14594e-06
Pg_S7676.2	unknown	unknown	unknown	unknown	unknown	22.4928	25.2112	23.6362	23.4193	25.4229	25.4194	25.502	25.2742	23.7427	22.1848	24.0271	23.661	22.682	22.1295	22.7548	23.6084	Cluster -2	2	22.5	26.273	0	14.638	2.58195	0.00337548
Pg_S3590.3	elongation factor Ts family protein	AT4G29060.1	A0Q4H2	AT4G29060.1 | Symbols: emb2726 | elongation factor Ts family protein | chr4:14317744-14321315 FORWARD LENGTH=953	Elongation factor Ts OS=Francisella tularensis subsp. novicida (strain U112) GN=tsf PE=3 SV=1	23.9666	24.4812	24.5243	24.3256	25.6361	25.5141	25.6374	25.8999	23.3729	22.5104	23.8572	23.0209	22.3674	22.8158	22.4681	23.4798	Cluster -2	2	29	91.97	0	7.1245	5.81695	3.07394e-06
Pg_S3582.16	Ribosomal L28 family	AT4G31460.1	unknown	AT4G31460.1 | Symbols: | Ribosomal L28 family | chr4:15259773-15260847 REVERSE LENGTH=212	unknown	24.7924	22.7594	23.719	23.0005	27.3317	27.3385	27.3147	27.118	22.6685	22.4288	24.8545	22.4584	22.036	22.9986	23.7142	22.8866	Cluster -2	3	11.7	17.14	0	8.6554	4.7414	3.06257e-05
Pg_S2267.4	thylakoidal ascorbate peroxidase	AT1G77490.1	B1M869	AT1G77490.1 | Symbols: TAPX | thylakoidal ascorbate peroxidase | chr1:29117688-29120046 FORWARD LENGTH=426	Catalase-peroxidase OS=Methylobacterium radiotolerans (strain ATCC 27329 / DSM 1819 / JCM 2831) GN=katG PE=3 SV=1	23.0958	23.927	23.5526	23.3487	26.8755	27.2504	27.0993	27.0787	25.8592	21.9085	26.2871	22.95	22.9834	23.5104	22.7031	23.3462	Cluster -2	3	12.6	45.995	0	14.503	2.93161	0.0015676
Pg_S2243.3	unknown	unknown	unknown	unknown	unknown	22.7264	24.6201	24.2903	24.6429	26.3359	26.4497	26.475	26.0571	23.5933	21.9941	24.4271	23.8349	22.4087	23.5734	22.6761	22.5542	Cluster -2	4	25.8	22.839	0	17.756	3.88134	0.000198916
Pg_S2185.1	ribonuclease 1	AT2G02990.1	Q02933	AT2G02990.1 | Symbols: RNS1, ATRNS1 | ribonuclease 1 | chr2:873714-874667 FORWARD LENGTH=230	Ribonuclease T2-like OS=Saccharomyces cerevisiae (strain ATCC 204508 / S288c) GN=RNY1 PE=1 SV=1	23.1763	23.0336	23.2436	23.1999	24.4911	23.793	24.4511	23.7329	22.9084	22.4901	23.6471	22.8776	21.5633	23.1406	23.2581	23.4729	Cluster -2	2	14	26.076	0	7.0242	1.59657	0.029041
Pg_S1698.3	Copper amine oxidase family protein	AT1G62810.1	Q812C9	AT1G62810.1 | Symbols: | Copper amine oxidase family protein | chr1:23258253-23261772 REVERSE LENGTH=712	Retina-specific copper amine oxidase OS=Mus musculus GN=Aoc2 PE=2 SV=2	24.0584	20.685	23.7307	21.2088	31.3597	31.4289	31.2979	31.4391	22.5891	19.1092	23.9786	24.3057	20.6923	20.3136	20.8176	21.3118	Cluster -2	25	50.7	73.925	0	248.46	5.91761	2.46944e-06
Pg_S1345.17	unknown	unknown	unknown	unknown	unknown	24.3016	24.7461	25.4029	24.1628	25.9327	25.9975	25.9808	26.4035	23.0594	22.6296	24.7562	23.1302	22.6652	23.1554	22.4211	23.8918	Cluster -2	3	19.2	25.651	0	6.3621	4.06089	0.000134586
Pg_S0988.8	P-loop containing nucleoside triphosphate hydrolases superfamily protein	AT1G08410.1	A8GM60	AT1G08410.1 | Symbols: | P-loop containing nucleoside triphosphate hydrolases superfamily protein | chr1:2646307-2649106 FORWARD LENGTH=589	Probable GTP-binding protein EngB OS=Rickettsia akari (strain Hartford) GN=engB PE=3 SV=1	23.2641	24.3464	24.1579	24.8331	28.2415	28.3648	28.316	28.3007	22.2982	22.9315	23.8998	23.4333	21.9369	21.9264	22.4174	24.305	Cluster -2	5	43.8	45.676	0	82.547	6.26259	1.18154e-06
Pg_S0849.23	PGR5-LIKE A	AT4G22890.1	Q8GYC7	AT4G22890.1 | Symbols: PGR5-LIKE A | PGR5-LIKE A | chr4:12007157-12009175 FORWARD LENGTH=324	PGR5-like protein 1B, chloroplastic OS=Arabidopsis thaliana GN=PGRL1B PE=1 SV=1	23.8513	24.1572	23.856	23.3387	25.5924	24.9924	24.9406	25.1627	23.4297	22.6236	23.7739	23.6625	23.2807	23.103	22.8065	23.5711	Cluster -2	2	38.5	36.434	0	38.466	4.473	5.48349e-05
Pg_S7812.2	NAD(P)-binding Rossmann-fold superfamily protein	AT1G30620.1	Q31FG4	AT1G30620.1 | Symbols: HSR8, MUR4, UXE1 | NAD(P)-binding Rossmann-fold superfamily protein | chr1:10855496-10857970 FORWARD LENGTH=419	ADP-L-glycero-D-manno-heptose-6-epimerase OS=Thiomicrospira crunogena (strain XCL-2) GN=hldD PE=3 SV=1	23.7934	23.9692	24.6355	23.7322	26.0932	25.9264	25.889	25.839	23.6506	22.5657	23.1535	24.0913	22.3755	23.3135	22.3889	23.7806	Cluster -2	2	8.2	35.978	0	9.5124	4.73619	3.09232e-05
Pg_S5054.4	Mog1/PsbP/DUF1795-like photosystem II reaction center PsbP family protein	AT1G69680.1	O75002	AT1G69680.1 | Symbols: | Mog1/PsbP/DUF1795-like photosystem II reaction center PsbP family protein | chr1:26205148-26206568 FORWARD LENGTH=202	Nuclear import protein mog1 OS=Schizosaccharomyces pombe (strain 972 / ATCC 24843) GN=mog1 PE=3 SV=1	24.3109	26.6285	24.1879	23.7093	27.6248	27.6911	27.383	26.9317	22.8366	22.9448	24.5748	23.1427	24.3369	23.2754	22.6002	23.0201	Cluster -2	5	29.8	28.515	0	17.356	4.17298	0.000105723
Pg_S0741.60	DNA GYRASE B2	AT5G04130.1	P41001	AT5G04130.1 | Symbols: GYRB2 | DNA GYRASE B2 | chr5:1122084-1128031 REVERSE LENGTH=732	DNA topoisomerase 2 OS=Plasmodium falciparum (isolate K1 / Thailand) GN=TOP2 PE=3 SV=1	23.8229	25.5299	23.4219	24.3	25.909	26.0062	26.1052	25.8531	23.5379	23.228	24.7591	23.7244	23.6855	23.5966	24.3569	23.7271	Cluster -2	5	10.3	81.897	0	17.144	3.1624	0.000944552
Pg_S6104.7	Domain of unknown function (DUF3598)	AT2G44760.1	unknown	AT2G44760.1 | Symbols: | Domain of unknown function (DUF3598) | chr2:18452937-18454785 REVERSE LENGTH=500	unknown	24.149	24.8428	24.722	23.2375	25.9502	26.0513	26.0923	25.9469	23.0137	22.6905	23.107	23.6985	22.9009	22.5017	23.6565	22.807	Cluster -2	3	16.4	45.775	0	12.566	5.33648	8.52663e-06
Pg_S5454.4	Cyclophilin-like peptidyl-prolyl cis-trans isomerase family protein	AT4G33060.1	P52015	AT4G33060.1 | Symbols: | Cyclophilin-like peptidyl-prolyl cis-trans isomerase family protein | chr4:15948535-15951954 FORWARD LENGTH=504	Peptidyl-prolyl cis-trans isomerase 7 OS=Caenorhabditis elegans GN=cyn-7 PE=1 SV=2	23.4827	24.5965	23.8141	22.0008	25.4501	25.4235	25.3833	25.5105	22.1967	23.2195	23.9058	22.8681	23.4877	23.6947	22.7111	23.0588	Cluster -2	3	32.9	17.429	0	16.973	2.93319	0.00156409
Pg_S4533.13	Peptide chain release factor 1	AT2G47020.1	B2TZV9	AT2G47020.1 | Symbols: | Peptide chain release factor 1 | chr2:19320090-19322279 REVERSE LENGTH=413	Peptide chain release factor 1 OS=Shigella boydii serotype 18 (strain CDC 3083-94 / BS512) GN=prfA PE=3 SV=1	24.8381	24.5574	24.5083	23.2387	25.5991	25.5218	25.4634	25.4138	22.6796	23.2853	23.2164	22.7742	22.378	23.0824	23.2101	23.4394	Cluster -2	3	13.3	47.059	0	14.813	4.97352	1.86308e-05
Pg_S2912.1	Insulinase (Peptidase family M16) family protein	AT5G42390.1	unknown	AT5G42390.1 | Symbols: | Insulinase (Peptidase family M16) family protein | chr5:16945308-16952647 FORWARD LENGTH=1265	unknown	23.3771	24.9558	24.3884	22.924	25.3588	25.5046	25.5235	26.2297	22.524	23.6885	23.4266	23.7661	22.6974	23.4914	23.5214	24.4151	Cluster -2	5	9.1	137.24	0	14.505	2.80647	0.00206433
Pg_S2156.2	NADPH-dependent thioredoxin reductase C	AT2G41680.1	Q8ETS1	AT2G41680.1 | Symbols: NTRC | NADPH-dependent thioredoxin reductase C | chr2:17376349-17379028 REVERSE LENGTH=529	Ferredoxin--NADP reductase 1 OS=Oceanobacillus iheyensis (strain DSM 14371 / JCM 11309 / KCTC 3954 / HTE831) GN=OB0186 PE=3 SV=1	23.9108	25.8554	25.8254	22.841	27.6106	27.5843	27.7478	27.1652	24.0044	23.1095	22.8107	22.2663	22.1677	25.2344	25.4207	25.3206	Cluster -2	1	19.3	57.574	0	44.564	2.96494	0.00145853
Pg_S0488.18	alpha/beta-Hydrolases superfamily protein	AT4G16820.1	Q9P979	AT4G16820.1 | Symbols: PLA-I{beta]2 | alpha/beta-Hydrolases superfamily protein | chr4:9467563-9469116 FORWARD LENGTH=517	Feruloyl esterase A OS=Aspergillus awamori GN=faeA PE=1 SV=3	24.2228	24.2067	24.4413	22.6996	26.7972	26.7724	26.6499	26.1994	23.0166	22.8111	23.7111	23.3166	22.7878	24.2032	23.424	23.8258	Cluster -2	4	18.4	42.175	0	28.267	5.20491	1.13196e-05
Pg_S0399.31	CLP protease R subunit 4	AT4G17040.1	Q7UK66	AT4G17040.1 | Symbols: CLPR4 | CLP protease R subunit 4 | chr4:9586740-9589297 REVERSE LENGTH=305	ATP-dependent Clp protease proteolytic subunit 2 OS=Rhodopirellula baltica (strain SH1) GN=clpP2 PE=3 SV=1	22.5825	24.6192	24.6071	23.4745	26.4201	26.1603	26.3364	26.3836	22.3707	22.9833	23.3089	22.9653	22.8937	23.4007	24.3856	23.4855	Cluster -2	6	38.1	26.579	0	20.01	4.6029	4.15236e-05
Pg_S2498.31	signal recognition particle receptor protein, chloroplast (FTSY)	AT2G45770.2	Q977V2	AT2G45770.2 | Symbols: CPFTSY | signal recognition particle receptor protein, chloroplast (FTSY) | chr2:18851248-18853402 FORWARD LENGTH=373	Signal recognition particle 54 kDa protein OS=Haloferax volcanii (strain ATCC 29605 / DSM 3757 / JCM 8879 / NBRC 14742 / NCIMB 2012 / VKM B-1768 / DS2) GN=srp54 PE=1 SV=1	23.0551	24.579	24.2106	22.6571	26.2923	26.2503	26.1923	26.1577	22.8543	22.6636	23.0732	24.1301	23.2797	23.2419	23.6703	23.9754	Cluster -2	4	16.3	38.91	0	9.3653	4.49415	5.23458e-05
Pg_S0276.3	plastid movement impaired1	AT1G42550.1	unknown	AT1G42550.1 | Symbols: PMI1 | plastid movement impaired1 | chr1:15977131-15979734 FORWARD LENGTH=843	unknown	24.7284	24.3695	24.1873	22.9148	25.8407	25.7788	25.8461	25.7811	23.4394	23.1558	23.5132	23.1611	22.2498	23.5588	22.7215	23.6627	Cluster -2	5	9.8	95.362	0	19.555	4.45206	5.75107e-05
Pg_S6003.4	Pentapeptide repeat-containing protein	AT1G12250.1	Q8H1Q1	AT1G12250.1 | Symbols: | Pentapeptide repeat-containing protein | chr1:4159287-4161269 FORWARD LENGTH=280	Thylakoid lumenal protein At1g12250, chloroplastic OS=Arabidopsis thaliana GN=At1g12250 PE=1 SV=1	22.7964	24.2535	25.2324	23.1357	23.2022	26.3099	26.0295	25.9719	23.1194	23.2355	22.7826	23.4502	24.1715	23.5222	23.9467	23.247	Cluster -2	2	13.9	29.103	0	13.803	1.46884	0.0384075
Pg_S4604.8	4-hydroxy-3-methylbut-2-enyl diphosphate reductase	AT4G34350.1	Q9FBM1	AT4G34350.1 | Symbols: CLB6, ISPH, HDR | 4-hydroxy-3-methylbut-2-enyl diphosphate reductase | chr4:16428681-16431038 REVERSE LENGTH=466	4-hydroxy-3-methylbut-2-enyl diphosphate reductase OS=Streptomyces coelicolor (strain ATCC BAA-471 / A3(2) / M145) GN=ispH PE=3 SV=2	24.5139	24.4274	25.6802	23.7731	25.7718	25.4294	25.5383	25.6651	23.0325	23.2852	23.2988	22.9014	23.3509	22.5672	22.8035	25.3664	Cluster -2	2	13.3	51.48	0	6.1403	2.59335	0.00329237
Pg_S7351.1	Tic22-like family protein	AT5G62650.1	unknown	AT5G62650.1 | Symbols: | Tic22-like family protein | chr5:25152873-25155872 REVERSE LENGTH=529	unknown	23.2518	24.0067	23.6603	24.556	25.8113	26.1277	26.1726	26.3452	23.0078	23.5004	22.2295	24.0786	24.3477	22.7924	24.5804	24.4672	Cluster -2	4	16.4	30.57	0	8.4772	3.64722	0.00033015
Pg_S0622.9	HXXXD-type acyl-transferase family protein	AT1G03495.1	Q9ZTK5	AT1G03495.1 | Symbols: | HXXXD-type acyl-transferase family protein | chr1:873436-874832 FORWARD LENGTH=465	Deacetylvindoline O-acetyltransferase OS=Catharanthus roseus GN=DAT PE=1 SV=1	23.5911	24.6763	25.1616	24.3547	27.0502	27.2725	27.2888	27.0941	23.8087	23.2927	23.8797	23.679	24.7577	22.6854	24.497	24.8446	Cluster -2	8	30.9	41.746	0	37.825	4.75825	2.95463e-05
Pg_S0148.7	photosystem II subunit Q-2	AT4G05180.1	P12852	AT4G05180.1 | Symbols: PSBQ, PSBQ-2, PSII-Q | photosystem II subunit Q-2 | chr4:2672093-2673170 REVERSE LENGTH=230	Oxygen-evolving enhancer protein 3, chloroplastic OS=Chlamydomonas reinhardtii GN=PSBQ PE=1 SV=1	23.2181	24.0104	25.2473	24.368	25.532	25.8204	25.4565	25.6155	22.3697	23.0103	23.7212	22.4683	22.9941	23.2149	23.1622	24.7005	Cluster -2	2	16.4	19.476	0	7.9627	3.2635	0.000759561
Pg_S7416.4	Rho termination factor	AT1G06190.1	Q8L4E7	AT1G06190.1 | Symbols: | Rho termination factor | chr1:1892467-1894078 REVERSE LENGTH=401	SAP-like protein BP-73 OS=Oryza sativa subsp. japonica GN=BP-73 PE=1 SV=1	23.0315	25.088	24.056	24.2337	25.1904	25.0775	25.4556	25.1471	23.2694	23.4018	23.6744	24.9608	23.9761	21.4644	23.6715	21.9318	Cluster -2	2	6.9	43.7	0	36.39	1.91662	0.0144125
Pg_S8044.1	Ribosomal protein L6 family	AT1G05190.1	A1USQ9	AT1G05190.1 | Symbols: emb2394 | Ribosomal protein L6 family | chr1:1502515-1503738 REVERSE LENGTH=223	50S ribosomal protein L6 OS=Bartonella bacilliformis (strain ATCC 35685 / KC583) GN=rplF PE=3 SV=1	24.3213	23.3905	24.5547	23.729	27.5785	27.4495	27.4293	27.3452	22.6036	24.3498	23.5793	21.7283	23.7731	22.8866	23.9902	22.4753	Cluster -2	6	34.1	25.082	0	22.481	5.24237	1.04496e-05
Pg_S5506.4	metallopeptidase M24 family protein	AT3G51800.2	Q9ZCD3	AT3G51800.2 | Symbols: ATG2, EBP1, ATEBP1 | metallopeptidase M24 family protein | chr3:19211261-19213568 REVERSE LENGTH=401	Methionine aminopeptidase OS=Rickettsia prowazekii (strain Madrid E) GN=map PE=1 SV=1	24.4212	24.271	24.1896	24.7624	24.9173	25.0776	25.699	24.7554	23.5424	23.5199	22.945	22.8939	24.6633	23.1445	23.5602	22.9809	Cluster -2	4	14.2	75.22	0	24.725	3.24077	0.000796921
Pg_S3429.18	translocon at the outer envelope membrane of chloroplasts 34	AT5G05000.2	Q6S5G3	AT5G05000.2 | Symbols: TOC34, ATTOC34, OEP34 | translocon at the outer envelope membrane of chloroplasts 34 | chr5:1474262-1475772 REVERSE LENGTH=313	Translocase of chloroplast 90, chloroplastic OS=Arabidopsis thaliana GN=TOC90 PE=1 SV=1	24.7845	22.865	23.7686	24.6823	25.8806	26.1086	26.2702	25.874	22.9257	23.7105	23.4768	21.1699	24.9027	23.3974	23.8963	23.0967	Cluster -2	3	21.2	31.108	0	10.317	2.92764	0.00157978
Pg_S2538.10	Glycosyl hydrolase family 38 protein	AT3G26720.1	Q64542	AT3G26720.1 | Symbols: | Glycosyl hydrolase family 38 protein | chr3:9816707-9823056 FORWARD LENGTH=1019	Plasma membrane calcium-transporting ATPase 4 OS=Rattus norvegicus GN=Atp2b4 PE=2 SV=1	24.2358	23.5952	23.8006	25.1661	25.6323	25.8471	25.376	25.3976	23.2625	23.3429	23.0343	22.7394	24.0641	23.433	24.6002	23.2205	Cluster -2	2	28.1	127.23	0	16.034	3.90659	0.000188372
Pg_S1615.3	Haloacid dehalogenase-like hydrolase (HAD) superfamily protein	AT4G26190.1	unknown	AT4G26190.1 | Symbols: | Haloacid dehalogenase-like hydrolase (HAD) superfamily protein | chr4:13262473-13266282 REVERSE LENGTH=1057	unknown	23.7189	22.6704	23.2569	23.3828	24.8849	24.9652	25.032	24.4482	23.0455	23.3874	23.8343	22.6739	23.629	22.6668	23.7468	22.7213	Cluster -2	1	32.4	29.627	0	12.421	3.24881	0.000783428
Pg_S0741.54	cystathionine beta-lyase	AT3G57050.1	P06721	AT3G57050.1 | Symbols: CBL | cystathionine beta-lyase | chr3:21111939-21114521 REVERSE LENGTH=464	Cystathionine beta-lyase MetC OS=Escherichia coli (strain K12) GN=metC PE=1 SV=1	24.027	24.1364	23.9343	23.9603	26.0151	25.7459	25.4185	25.421	23.1157	24.1392	22.9292	23.0531	24.4523	22.5954	24.6652	22.865	Cluster -2	4	9.7	50.263	0	9.0901	3.06855	0.00115704
Pg_S1468.16	UDP-glucosyl transferase 84B1	AT2G23260.1	Q83140	AT2G23260.1 | Symbols: UGT84B1 | UDP-glucosyl transferase 84B1 | chr2:9900046-9901416 REVERSE LENGTH=456	Ecdysteroid UDP-glucosyltransferase OS=Mamestra brassicae nuclear polyhedrosis virus GN=EGT PE=3 SV=1	24.5568	23.8369	24.2522	23.9586	26.851	26.7505	26.8028	26.6877	23.3277	23.5013	23.5952	21.9453	24.2008	22.6815	24.0849	22.7972	Cluster -2	6	24.5	50.174	0	35.97	5.31273	8.97342e-06
Pg_S5791.3	Nucleic acid-binding proteins superfamily	AT1G71720.1	P73530	AT1G71720.1 | Symbols: | Nucleic acid-binding proteins superfamily | chr1:26983744-26985893 FORWARD LENGTH=500	30S ribosomal protein S1 homolog A OS=Synechocystis sp. (strain PCC 6803 / Kazusa) GN=rps1A PE=3 SV=1	24.9369	24.3351	24.0162	23.9407	25.5033	25.7827	25.4778	25.7519	23.2573	22.6142	24.5096	23.3105	24.9991	22.0693	23.5596	24.0317	Cluster -2	1	12.2	50.858	0	15.232	2.17168	0.00833274
Pg_S5578.8	ATP binding	AT3G24430.1	Q874M2	AT3G24430.1 | Symbols: HCF101 | ATP binding | chr3:8868731-8872154 REVERSE LENGTH=532	Cytosolic Fe-S cluster assembly factor NBP35 OS=Candida glabrata (strain ATCC 2001 / CBS 138 / JCM 3761 / NBRC 0622 / NRRL Y-65) GN=NBP35 PE=3 SV=1	24.2642	23.2179	23.5344	24.319	27.5639	27.5733	27.5944	28.1357	21.7615	22.591	23.3084	21.8283	26.0379	23.2102	23.444	24.1314	Cluster -2	1	30.9	40.837	0	75.091	5.29485	9.32492e-06
Pg_S5458.2	Ribonuclease II/R family protein	AT1G77680.1	Q0WPN0	AT1G77680.1 | Symbols: | Ribonuclease II/R family protein | chr1:29192188-29195963 REVERSE LENGTH=1055	Inactive exonuclease DIS3L2 OS=Arabidopsis thaliana GN=SOV PE=2 SV=1	24.7192	23.4919	23.7073	24.1623	24.8367	24.8435	24.7979	24.8658	22.3713	22.6999	22.4627	22.9489	24.4121	22.6146	23.1477	23.8084	Cluster -2	3	5.1	123.65	0	9.5412	3.52372	0.000430886
Pg_S3671.7	Rubisco methyltransferase family protein	AT5G14260.3	unknown	AT5G14260.3 | Symbols: | Rubisco methyltransferase family protein | chr5:4601139-4603873 FORWARD LENGTH=514	unknown	25.0787	24.3902	24.4457	24.8525	27.5919	27.5398	27.8285	27.4673	22.4595	23.0858	24.6776	22.8965	24.9581	24.4189	23.159	23.9146	Cluster -2	12	32.7	55.738	0	56.918	5.43134	7.01513e-06
Pg_S3669.9	Trypsin family protein with PDZ domain	AT5G39830.1	O82261	AT5G39830.1 | Symbols: DEGP8, DEG8 | Trypsin family protein with PDZ domain | chr5:15942883-15945676 FORWARD LENGTH=448	Protease Do-like 2, chloroplastic OS=Arabidopsis thaliana GN=DEGP2 PE=1 SV=2	25.233	24.8057	23.829	25.0402	26.0024	25.7523	25.6672	26.4722	22.4767	22.681	23.5117	22.5743	24.4026	23.5268	23.7672	24.1725	Cluster -2	2	17.1	49.299	0	26.556	5.23321	1.06521e-05
Pg_S1935.17	6-phosphogluconolactonase 4	AT5G24410.1	B3LSS7	AT5G24410.1 | Symbols: PGL4 | 6-phosphogluconolactonase 4 | chr5:8332690-8333984 REVERSE LENGTH=261	6-phosphogluconolactonase 3 OS=Saccharomyces cerevisiae (strain RM11-1a) GN=SOL3 PE=3 SV=1	23.648	23.699	25.0003	24.1782	26.7997	27.0262	26.9848	26.9575	22.467	23.1287	23.9979	23.8417	24.6283	22.891	23.4819	22.7462	Cluster -2	1	16.5	12.41	0	5.9754	4.96637	1.89055e-05
Pg_S6490.3	ssDNA-binding transcriptional regulator	AT5G09250.1	O65155	AT5G09250.1 | Symbols: KIWI | ssDNA-binding transcriptional regulator | chr5:2875421-2876368 REVERSE LENGTH=107	RNA polymerase II transcriptional coactivator KELP OS=Arabidopsis thaliana GN=KELP PE=1 SV=1	23.8089	23.2622	24.908	24.099	26.9842	27.0136	26.9286	26.6306	22.8713	22.2526	22.6538	23.7707	24.8717	23.1016	23.7543	23.2933	Cluster -2	3	18.7	29.781	0	27.659	5.22531	1.08408e-05
Pg_S7459.2	Ribose 5-phosphate isomerase, type A protein	AT3G04790.1	Q32BX5	AT3G04790.1 | Symbols: | Ribose 5-phosphate isomerase, type A protein | chr3:1313365-1314195 FORWARD LENGTH=276	Ribose-5-phosphate isomerase A OS=Shigella dysenteriae serotype 1 (strain Sd197) GN=rpiA PE=3 SV=1	24.6335	23.8829	23.7531	23.7948	28.3651	28.41	28.5278	28.505	24.4619	24.414	23.0924	23.9125	25.0818	24.4654	24.2373	23.4264	Cluster -2	5	68.8	13.411	0	46.691	7.23335	1.53032e-07
Pg_S6057.9	Cyclophilin-like peptidyl-prolyl cis-trans isomerase family protein	AT4G33060.1	P52015	AT4G33060.1 | Symbols: | Cyclophilin-like peptidyl-prolyl cis-trans isomerase family protein | chr4:15948535-15951954 FORWARD LENGTH=504	Peptidyl-prolyl cis-trans isomerase 7 OS=Caenorhabditis elegans GN=cyn-7 PE=1 SV=2	23.5262	23.2789	23.7459	24.6691	26.565	26.7441	26.8454	26.4195	23.9948	23.0822	22.9374	23.7052	24.5973	23.6973	24.0832	23.8886	Cluster -2	3	14.9	28.79	0	10.841	5.93472	2.38541e-06
Pg_S5121.1	unknown	unknown	unknown	unknown	unknown	23.8356	23.4357	24.235	24.0083	27.9313	27.8139	27.8709	27.9346	23.9161	22.1194	23.3109	22.1156	23.6858	23.9323	24.3905	22.3384	Cluster -2	5	27	30.692	0	28.563	6.23689	1.24545e-06
Pg_S4632.7	RNA-binding (RRM/RBD/RNP motifs) family protein	AT4G14300.1	Q6GLB5	AT4G14300.1 | Symbols: | RNA-binding (RRM/RBD/RNP motifs) family protein | chr4:8231179-8232785 FORWARD LENGTH=411	ELAV-like protein 1 OS=Xenopus tropicalis GN=elavl1 PE=2 SV=1	24.5123	23.7815	24.0091	24.3132	27.4261	27.2549	27.0403	27.3154	23.9675	22.5313	23.2696	21.8189	24.4522	23.2782	23.4197	23.2876	Cluster -2	4	27.6	30.712	0	15.166	6.08448	1.73016e-06
Pg_S2647.19	Rubisco methyltransferase family protein	AT5G14260.3	unknown	AT5G14260.3 | Symbols: | Rubisco methyltransferase family protein | chr5:4601139-4603873 FORWARD LENGTH=514	unknown	23.7133	22.9764	24.3402	24.3619	25.7751	26.0461	25.9596	26.0353	24.5101	23.4619	21.6812	22.5393	24.3749	22.3833	23.7452	22.6266	Cluster -2	4	11.3	56.643	0	14.982	2.85808	0.00183978
Pg_S2058.8	Leucine-rich repeat transmembrane protein kinase	AT1G56140.1	O81069	AT1G56140.1 | Symbols: | Leucine-rich repeat transmembrane protein kinase | chr1:21001708-21007725 REVERSE LENGTH=1033	Probable leucine-rich repeat receptor-like protein kinase At2g28990 OS=Arabidopsis thaliana GN=At2g28990 PE=2 SV=1	23.716	23.3328	23.7232	22.5808	26.9585	27.1887	26.6495	26.6315	24.2289	23.4511	23.1543	23.0018	24.6325	23.4245	24.7801	22.4826	Cluster -2	6	6	153	0	21.965	4.66403	3.63225e-05
Pg_S1439.22	CAX-interacting protein 2	AT2G38270.1	Q2R075	AT2G38270.1 | Symbols: CXIP2, ATGRX2 | CAX-interacting protein 2 | chr2:16031347-16033054 REVERSE LENGTH=293	Putative glutaredoxin-C11 OS=Oryza sativa subsp. japonica GN=GRXC11 PE=3 SV=1	25.2319	25.3234	25.1935	25.0974	26.7349	26.7898	26.7303	26.8249	24.9891	24.9021	24.6921	24.7478	25.5924	25.341	25.2167	24.7321	Cluster -2	5	37.4	29.65	0	42.628	7.28048	1.38549e-07
Pg_S0319.15	pyruvate dehydrogenase E1 alpha	AT1G01090.1	F4KIN4	AT1G01090.1 | Symbols: PDH-E1 ALPHA | pyruvate dehydrogenase E1 alpha | chr1:47705-49166 REVERSE LENGTH=428	Putative 2-dehydropantoate 2-reductase OS=Arabidopsis thaliana GN=KPR PE=3 SV=1	24.8244	23.0838	24.4123	24.9365	28.0183	27.991	28.0708	27.1393	25.0006	23.7507	21.7029	22.9905	24.9136	23.7007	24.598	22.9144	Cluster -2	1	29.5	59.736	0	20.888	3.93998	0.000175351
Pg_S0354.18	glutamate tRNA synthetase	AT5G64050.1	A4JFB2	AT5G64050.1 | Symbols: ATERS, OVA3, ERS | glutamate tRNA synthetase | chr5:25630196-25633099 REVERSE LENGTH=570	Glutamate--tRNA ligase OS=Burkholderia vietnamiensis (strain G4 / LMG 22486) GN=gltX PE=3 SV=1	24.6452	23.4889	23.9526	25.2968	27.0888	26.6602	26.8261	26.8898	24.6939	22.9113	22.0201	23.5831	24.778	24.4728	24.411	22.2552	Cluster -2	4	13.2	61.661	0	18.429	3.17046	0.000928504
Pg_S4278.2	glycine decarboxylase P-protein 1	AT4G33010.1	A4WUX2	AT4G33010.1 | Symbols: AtGLDP1, GLDP1 | glycine decarboxylase P-protein 1 | chr4:15926852-15931150 REVERSE LENGTH=1037	Glycine dehydrogenase (decarboxylating) OS=Rhodobacter sphaeroides (strain ATCC 17025 / ATH 2.4.3) GN=gcvP PE=3 SV=1	24.6697	23.6474	23.3567	23.4641	27.8105	28.1145	28.217	28.341	23.6284	23.4043	24.2972	24.1449	25.1063	25.0686	23.7458	22.1466	Cluster -2	1	26.1	82.342	0	24.318	4.98971	1.80254e-05
Pg_S4174.7	UDP-Glycosyltransferase superfamily protein	AT4G01070.1	P34317	AT4G01070.1 | Symbols: GT72B1, UGT72B1 | UDP-Glycosyltransferase superfamily protein | chr4:461858-463300 REVERSE LENGTH=480	Putative UDP-glucuronosyltransferase ugt-60 OS=Caenorhabditis elegans GN=ugt-60 PE=3 SV=2	23.0783	24.4023	24.3668	24.629	26.7412	27.0894	27.3371	27.1663	22.9808	23.2892	22.8714	23.4391	25.9681	25.9419	23.4052	22.5941	Cluster -2	6	69.4	44.931	0	18.503	3.26111	0.000763025
Pg_S2764.5	RNI-like superfamily protein	AT2G39940.1	Q9LPW7	AT2G39940.1 | Symbols: COI1 | RNI-like superfamily protein | chr2:16672848-16675486 REVERSE LENGTH=592	Protein AUXIN SIGNALING F-BOX 3 OS=Arabidopsis thaliana GN=AFB3 PE=1 SV=1	24.1814	23.7427	23.8912	23.0218	27.5049	27.3289	27.1849	26.3539	23.5217	22.6446	23.4152	22.8378	25.7677	23.814	22.8013	22.164	Cluster -2	7	15.1	63.684	0	17.358	3.87037	0.000203685
Pg_S2762.10	glycosyl hydrolase 9B13	AT4G02290.1	P22699	AT4G02290.1 | Symbols: AtGH9B13, GH9B13 | glycosyl hydrolase 9B13 | chr4:1002654-1005125 REVERSE LENGTH=516	Endoglucanase OS=Dictyostelium discoideum GN=celA PE=2 SV=1	24.093	23.5042	23.758	23.3142	27.4701	27.6353	27.5003	27.3791	23.4207	22.1131	23.7218	22.198	26.8874	23.3717	22.8222	22.5755	Cluster -2	7	27.8	52.284	0	24.776	3.49223	0.000460769
Pg_S2608.20	Ribosomal protein S5/Elongation factor G/III/V family protein	AT3G12915.1	C0Q0C2	AT3G12915.1 | Symbols: | Ribosomal protein S5/Elongation factor G/III/V family protein | chr3:4112999-4115708 FORWARD LENGTH=820	Elongation factor G OS=Salmonella paratyphi C (strain RKS4594) GN=fusA PE=3 SV=1	24.2969	23.5286	24.0995	24.1559	25.9247	26.2854	26.4387	26.1335	23.8677	22.1719	23.3518	24.9524	25.8051	25.8534	22.261	22.9538	Cluster -2	9	13.1	110.17	0	24.195	1.53826	0.033018
Pg_S2566.13	Photosystem II reaction center PsbP family protein	AT2G28605.1	Q8VY52	AT2G28605.1 | Symbols: | Photosystem II reaction center PsbP family protein | chr2:12254911-12255689 FORWARD LENGTH=232	PsbP domain-containing protein 2, chloroplastic OS=Arabidopsis thaliana GN=PPD2 PE=1 SV=1	23.4343	23.0127	24.4577	24.8446	26.8192	27.3018	26.7704	27.3002	22.7047	21.9357	22.8631	23.5998	25.6539	24.0584	21.9852	22.8636	Cluster -2	6	36.2	23.747	0	20.643	3.58213	0.000380258
Pg_S3787.1	high chlorophyll fluorescent 109	AT5G36170.1	A7HI45	AT5G36170.1 | Symbols: HCF109, ATPRFB | high chlorophyll fluorescent 109 | chr5:14236083-14237974 REVERSE LENGTH=456	Peptide chain release factor 1 OS=Anaeromyxobacter sp. (strain Fw109-5) GN=prfA PE=3 SV=1	23.8069	23.4482	23.2172	24.268	25.5337	25.5198	25.5512	25.4581	23.3017	22.8338	22.6909	22.8535	23.9955	22.763	22.4277	22.7607	Cluster -2	2	6.1	51.338	0	19.194	5.19721	1.15077e-05
Pg_S0978.44	rubredoxin family protein	AT5G17170.1	unknown	AT5G17170.1 | Symbols: ENH1 | rubredoxin family protein | chr5:5649335-5650975 FORWARD LENGTH=271	unknown	24.6016	25.0341	23.5404	23.4112	27.2431	25.8498	27.2764	27.4153	22.7537	23.0352	23.7775	22.3347	24.6529	23.3667	22.2812	22.5203	Cluster -2	2	37.1	29.132	0	14.69	4.2107	9.72468e-05
Pg_S0431.62	polyribonucleotide nucleotidyltransferase, putative	AT3G03710.1	B1ZS98	AT3G03710.1 | Symbols: RIF10, PNP | polyribonucleotide nucleotidyltransferase, putative | chr3:919542-924906 FORWARD LENGTH=922	Polyribonucleotide nucleotidyltransferase OS=Opitutus terrae (strain DSM 11246 / PB90-1) GN=pnp PE=3 SV=1	23.0323	23.8692	23.4533	23.3721	27.6116	27.4833	28.1092	27.5527	24.3807	22.9975	23.5192	22.81	25.9263	22.6043	22.7754	23.0083	Cluster -2	10	14.4	103.65	0	41.735	4.47872	5.41479e-05
Pg_S0096.10	uridylyltransferase-related	AT1G16880.1	P83643	AT1G16880.1 | Symbols: | uridylyltransferase-related | chr1:5773796-5776125 FORWARD LENGTH=290	Unknown protein DS12 from 2D-PAGE of leaf, chloroplastic OS=Oryza sativa subsp. indica GN=OsI_027381 PE=1 SV=2	23.7094	25.0099	24.5486	24.4164	28.5664	29.5096	29.3679	27.8848	24.0841	22.4877	24.159	22.3798	24.6262	25.0144	22.9323	22.006	Cluster -2	8	52.9	31.461	0	50.233	4.9464	1.97593e-05
Pg_S0219.18	30S ribosomal protein, putative	AT5G24490.1	Q5XAQ7	AT5G24490.1 | Symbols: | 30S ribosomal protein, putative | chr5:8365690-8367178 FORWARD LENGTH=308	Ribosome-associated factor Y OS=Streptococcus pyogenes serotype M6 (strain ATCC BAA-946 / MGAS10394) GN=M6_Spy1371 PE=1 SV=1	23.1574	24.3277	23.3626	23.1026	28.367	27.5941	27.537	27.6252	23.5648	23.7349	22.6455	22.8799	25.7499	23.0717	22.2315	22.5932	Cluster -2	7	26.6	35.736	0	86.472	4.59752	4.19453e-05
Pg_S7792.1	TCP-1/cpn60 chaperonin family protein	AT3G18190.1	Q6NF74	AT3G18190.1 | Symbols: | TCP-1/cpn60 chaperonin family protein | chr3:6232226-6233836 FORWARD LENGTH=536	60 kDa chaperonin 2 OS=Corynebacterium diphtheriae (strain ATCC 700971 / NCTC 13129 / Biotype gravis) GN=groL2 PE=3 SV=1	31.5724	31.5993	31.7343	31.6986	33.7987	33.8075	33.8246	33.8322	30.7481	30.768	30.7789	30.8711	31.5504	31.6337	31.6155	31.6375	Cluster -2	2	49	75.53	0	323.31	16.2787	3.6269e-15
Pg_S7126.5	chaperonin-60alpha	AT2G28000.1	Q89IK8	AT2G28000.1 | Symbols: CPN60A, CH-CPN60A, SLP | chaperonin-60alpha | chr2:11926603-11929184 FORWARD LENGTH=586	60 kDa chaperonin 6 OS=Bradyrhizobium diazoefficiens (strain JCM 10833 / IAM 13628 / NBRC 14792 / USDA 110) GN=groL6 PE=3 SV=1	31.289	31.3813	31.3335	31.3157	33.3805	33.3544	33.3892	33.4463	30.3588	30.3681	30.3993	30.2931	30.9836	30.995	31.0001	31.0034	Cluster -2	16	66.7	62.108	0	323.31	18.3342	9.57529e-17
Pg_S6308.5	peroxisomal NAD-malate dehydrogenase 2	AT5G09660.4	Q2GCH6	AT5G09660.4 | Symbols: PMDH2 | peroxisomal NAD-malate dehydrogenase 2 | chr5:2993691-2995551 REVERSE LENGTH=363	Malate dehydrogenase OS=Neorickettsia sennetsu (strain Miyayama) GN=mdh PE=3 SV=1	24.5782	24.2749	23.3158	24.0077	26.8601	26.8134	26.6898	26.7179	21.9615	22.0822	23.121	21.8409	23.5902	23.239	24.5289	23.2314	Cluster -2	2	49.1	36.654	0	17.282	6.61712	5.63124e-07
Pg_S6284.7	nucleoside diphosphate kinase 2	AT5G63310.1	A6SZX4	AT5G63310.1 | Symbols: NDPK2, NDPK1A, NDPK IA IA, NDPK IA, ATNDPK2 | nucleoside diphosphate kinase 2 | chr5:25372122-25373838 REVERSE LENGTH=231	Nucleoside diphosphate kinase OS=Janthinobacterium sp. (strain Marseille) GN=ndk PE=3 SV=1	24.8674	25.092	24.6583	24.6303	28.4283	28.4036	28.537	28.61	23.6656	22.2862	22.3729	23.7381	24.7464	24.9886	24.8549	24.8461	Cluster -2	1	24.4	24.928	0	73.255	8.52199	1.07273e-08
Pg_S5204.6	2-oxoacid dehydrogenases acyltransferase family protein	AT3G06850.1	Q73WX4	AT3G06850.1 | Symbols: BCE2, LTA1, DIN3 | 2-oxoacid dehydrogenases acyltransferase family protein | chr3:2158212-2160465 REVERSE LENGTH=483	Multifunctional 2-oxoglutarate metabolism enzyme OS=Mycobacterium paratuberculosis (strain ATCC BAA-968 / K-10) GN=kgd PE=3 SV=1	23.9916	23.5453	24.8779	23.7513	25.3878	25.5039	25.397	25.2286	23.466	23.494	22.7141	23.6015	23.8305	23.8413	24.0623	23.9555	Cluster -2	2	11.7	48.957	0	12.178	4.49767	5.19826e-05
Pg_S5052.3	chloroplast RNA binding	AT1G09340.1	Q9LYA9	AT1G09340.1 | Symbols: CRB, CSP41B, HIP1.3 | chloroplast RNA binding | chr1:3015473-3018035 FORWARD LENGTH=378	Chloroplast stem-loop binding protein of 41 kDa a, chloroplastic OS=Arabidopsis thaliana GN=CSP41A PE=1 SV=1	24.1625	25.1516	25.3764	24.1581	27.3251	27.4004	27.7567	27.3833	23.586	22.6295	23.244	23.4146	23.8536	25.3342	24.7114	24.5667	Cluster -2	3	60	42.495	0	24.712	6.36649	9.53675e-07
Pg_S5975.4	unknown	unknown	unknown	unknown	unknown	24.1919	24.3663	24.6472	23.4975	25.4325	25.1327	25.1252	24.9927	23.3958	23.3797	23.0666	22.8693	23.8008	23.6422	23.737	23.6074	Cluster -2	2	14.4	18.243	0	28.935	5.35997	8.11415e-06
Pg_S3965.9	2Fe-2S ferredoxin-like superfamily protein	AT1G60950.1	Q7M258	AT1G60950.1 | Symbols: FED A, ATFD2 | 2Fe-2S ferredoxin-like superfamily protein | chr1:22444565-22445011 FORWARD LENGTH=148	Ferredoxin-2 (Fragment) OS=Pisum sativum PE=1 SV=1	28.1822	27.7563	27.6201	28.1324	31.531	31.7065	31.6889	31.3435	22.3117	23.8648	23.1391	23.6072	23.8179	29.0762	23.203	27.4431	Cluster -2	1	23.1	16.08	0	28.241	4.53803	4.76653e-05
Pg_S3948.2	Polyketide cyclase/dehydrase and lipid transport superfamily protein	AT1G55960.1	Q8R1R3	AT1G55960.1 | Symbols: | Polyketide cyclase/dehydrase and lipid transport superfamily protein | chr1:20927962-20929825 REVERSE LENGTH=403	StAR-related lipid transfer protein 7, mitochondrial OS=Mus musculus GN=Stard7 PE=2 SV=2	23.5507	23.517	24.8277	23.9098	24.8813	25.0059	25.303	24.9314	22.6805	22.0201	22.032	23.6049	22.8041	23.8172	23.2029	23.8233	Cluster -2	2	8	25.472	0	4.2228	3.47423	0.000478849
Pg_S3414.19	DnaJ/Hsp40 cysteine-rich domain superfamily protein	AT1G75690.1	Q8GSJ6	AT1G75690.1 | Symbols: | DnaJ/Hsp40 cysteine-rich domain superfamily protein | chr1:28422273-28423170 REVERSE LENGTH=154	Protein disulfide-isomerase LQY1 OS=Arabidopsis thaliana GN=LQY1 PE=1 SV=1	24.7217	24.3185	24.0852	24.7465	26.7728	26.4211	26.3262	26.9643	22.7983	23.6668	22.5739	22.677	22.6908	23.8448	23.2268	24.5167	Cluster -2	2	23.9	16.451	0	16.707	5.74225	3.60316e-06
Pg_S3178.21	DNA-directed RNA polymerase family protein	ATCG00180.1	O25806	ATCG00180.1 | Symbols: RPOC1 | DNA-directed RNA polymerase family protein | chrC:20251-23084 REVERSE LENGTH=680	Bifunctional DNA-directed RNA polymerase subunit beta-beta' OS=Helicobacter pylori (strain ATCC 700392 / 26695) GN=rpoBC PE=1 SV=1	23.4604	24.7853	23.5275	23.858	25.7801	25.8555	26.0197	25.7107	23.9524	23.0289	21.9357	22.5393	23.2434	23.4732	23.4583	23.7132	Cluster -2	3	15.4	49.932	0	19.479	4.53528	4.79409e-05
Pg_S2791.34	unknown	unknown	unknown	unknown	unknown	24.9968	23.1081	24.098	23.024	26.3345	26.5649	26.5306	26.3608	22.4124	22.7809	22.1464	23.3936	23.0661	22.9935	23.051	23.3491	Cluster -2	4	16.7	37.536	0	14.917	5.68062	4.1214e-06
Pg_S2784.3	DegP protease 1	AT3G27925.1	Q8YG32	AT3G27925.1 | Symbols: DEGP1, Deg1 | DegP protease 1 | chr3:10366659-10368864 REVERSE LENGTH=439	Probable periplasmic serine endoprotease DegP-like OS=Brucella melitensis biotype 1 (strain 16M / ATCC 23456 / NCTC 10094) GN=htrA PE=3 SV=1	27.5806	27.4529	27.5037	27.3443	28.546	28.6169	28.6034	28.4648	26.6464	26.6089	26.5334	26.6338	27.1064	27.0256	27.0186	27.1494	Cluster -2	5	19	80.129	0	99.614	12.251	6.73756e-12
Pg_S6835.6	Ribosomal protein PSRP-3/Ycf65	AT1G68590.1	Q9LFV0	AT1G68590.1 | Symbols: | Ribosomal protein PSRP-3/Ycf65 | chr1:25757593-25758169 REVERSE LENGTH=166	30S ribosomal protein 3-2, chloroplastic OS=Arabidopsis thaliana GN=At5g15760 PE=2 SV=1	24.4163	24.4412	23.7663	24.3443	25.4365	25.4789	25.4548	25.5197	22.9196	23.7731	22.1225	22.7219	23.7097	24.3854	23.9954	23.278	Cluster -2	2	18	20.423	0	4.0026	4.57076	4.44076e-05
Pg_S1813.13	ribosomal protein S2	ATCG00160.1	P74071	ATCG00160.1 | Symbols: RPS2 | ribosomal protein S2 | chrC:15013-15723 REVERSE LENGTH=236	30S ribosomal protein S2 OS=Synechocystis sp. (strain PCC 6803 / Kazusa) GN=rpsB PE=3 SV=1	24.8857	24.149	23.4982	23.9208	28.1619	28.2696	28.1639	28.1732	21.6883	23.7087	21.7904	23.7912	23.5591	24.7569	22.5091	23.9243	Cluster -2	6	30.1	26.828	0	28.158	5.56742	5.22031e-06
Pg_S1812.19	plastocyanin 1	AT1G76100.1	P19567	AT1G76100.1 | Symbols: PETE1 | plastocyanin 1 | chr1:28554217-28554732 REVERSE LENGTH=171	Pseudoazurin OS=Achromobacter cycloclastes GN=bcp PE=1 SV=2	25.6294	25.3519	25.6498	25.4935	29.1259	29.2212	29.3338	29.1085	23.2232	24.3059	23.6754	23.4083	24.8719	25.0236	24.935	25.1119	Cluster -2	3	38.3	16.784	0	27.168	11.1439	5.72389e-11
Pg_S1692.18	Transketolase	AT2G45290.1	A4IQR7	AT2G45290.1 | Symbols: | Transketolase | chr2:18672737-18675589 FORWARD LENGTH=741	1-deoxy-D-xylulose-5-phosphate synthase OS=Geobacillus thermodenitrificans (strain NG80-2) GN=dxs PE=3 SV=1	28.2043	28.3082	28.6652	28.0906	30.7789	30.8952	30.8858	30.7191	27.3672	27.098	27.2511	27.1486	28.0282	27.6235	27.8595	28.0671	Cluster -2	6	66.2	79.671	0	162.6	10.977	8.09473e-11
Pg_S1164.14	Chaperone protein htpG family protein	AT4G24190.1	B0UN89	AT4G24190.1 | Symbols: SHD, HSP90.7, AtHsp90.7, AtHsp90-7 | Chaperone protein htpG family protein | chr4:12551902-12555851 REVERSE LENGTH=823	Chaperone protein HtpG OS=Methylobacterium sp. (strain 4-46) GN=htpG PE=3 SV=1	30.6142	30.6092	30.5715	30.4896	32.4613	32.3898	32.432	32.4613	29.3433	29.298	29.3725	29.3069	30.0814	30.0581	30.131	30.1086	Cluster -2	3	66.6	90.325	0	323.31	17.6648	3.13068e-16
Pg_S1135.9	chaperonin-60alpha	AT2G28000.1	Q89IK8	AT2G28000.1 | Symbols: CPN60A, CH-CPN60A, SLP | chaperonin-60alpha | chr2:11926603-11929184 FORWARD LENGTH=586	60 kDa chaperonin 6 OS=Bradyrhizobium diazoefficiens (strain JCM 10833 / IAM 13628 / NBRC 14792 / USDA 110) GN=groL6 PE=3 SV=1	29.1082	29.3235	28.9481	29.0255	30.8443	30.7725	30.7784	30.5925	28.3885	28.3765	28.5136	28.4567	28.9249	28.9452	28.9068	28.8713	Cluster -2	7	63.3	62.141	0	169.5	11.4081	3.35549e-11
Pg_S6053.14	ribosomal protein S17	AT1G79850.1	Q8UE27	AT1G79850.1 | Symbols: RPS17, CS17, PRPS17 | ribosomal protein S17 | chr1:30041473-30041922 REVERSE LENGTH=149	30S ribosomal protein S17 OS=Agrobacterium tumefaciens (strain C58 / ATCC 33970) GN=rpsQ PE=3 SV=1	24.3226	24.2515	23.8449	24.1454	27.3971	27.4991	27.4757	27.4862	22.0954	22.4431	22.9355	23.2905	24.1196	24.9267	22.7868	22.8645	Cluster -2	3	35	11.318	0	10.252	6.29071	1.11498e-06
Pg_S0909.6	Rhodanese/Cell cycle control phosphatase superfamily protein	AT1G17850.2	Q1QPC1	AT1G17850.2 | Symbols: | Rhodanese/Cell cycle control phosphatase superfamily protein | chr1:6146470-6148820 REVERSE LENGTH=448	UPF0176 protein Nham_1078 OS=Nitrobacter hamburgensis (strain X14 / DSM 10229) GN=Nham_1078 PE=3 SV=1	24.544	24.3271	23.8662	24.0218	26.9181	25.5398	26.6986	26.6209	22.8904	23.1053	23.258	23.4274	23.6282	23.9419	24.0392	23.3219	Cluster -2	2	23.1	14.982	0	19.496	6.43858	8.21011e-07
Pg_S2673.5	thiazole biosynthetic enzyme, chloroplast (ARA6) (THI1) (THI4)	AT5G54770.1	P84548	AT5G54770.1 | Symbols: THI1, TZ, THI4 | thiazole biosynthetic enzyme, chloroplast (ARA6) (THI1) (THI4) | chr5:22246634-22247891 FORWARD LENGTH=349	Thiamine thiazole synthase, chloroplastic (Fragments) OS=Populus euphratica GN=THI1 PE=1 SV=1	23.9798	23.2685	24.3828	23.5686	26.6513	26.7065	26.6764	26.623	22.6729	22.642	22.2465	22.2597	23.4558	24.0319	23.1075	23.1604	Cluster -2	2	41.7	37.605	0	5.8882	8.28831	1.71463e-08
Pg_S0522.1	NOP56-like pre RNA processing ribonucleoprotein	AT3G05060.1	P49704	AT3G05060.1 | Symbols: | NOP56-like pre RNA processing ribonucleoprotein | chr3:1413174-1415564 REVERSE LENGTH=533	Pre-mRNA-processing factor 31 OS=Saccharomyces cerevisiae (strain ATCC 204508 / S288c) GN=PRP31 PE=1 SV=2	24.7833	25.1087	24.6556	23.7016	25.7643	25.9598	25.7131	25.7733	22.5345	21.9837	22.9013	22.4987	23.5158	25.2964	22.6726	24.2895	Cluster -2	1	19.1	63.128	0	31.375	3.92415	0.00018144
Pg_S8474.2	Ribosomal protein L31	AT5G55125.1	unknown	AT5G55125.1 | Symbols: | Ribosomal protein L31 | chr5:22372737-22372967 FORWARD LENGTH=76	unknown	22.9473	24.6139	24.678	23.8192	27.2993	27.4985	27.3463	27.3762	23.2969	22.145	22.8564	23.9981	22.7153	24.1447	23.1947	22.3734	Cluster -2	1	50.4	15.256	0	34.464	5.53086	5.6524e-06
Pg_S8361.2	ribonuclease 1	AT2G02990.1	Q02933	AT2G02990.1 | Symbols: RNS1, ATRNS1 | ribonuclease 1 | chr2:873714-874667 FORWARD LENGTH=230	Ribonuclease T2-like OS=Saccharomyces cerevisiae (strain ATCC 204508 / S288c) GN=RNY1 PE=1 SV=1	24.6077	24.3185	23.0544	23.4111	30.8121	31.0205	31.0032	30.8392	23.1969	22.1102	21.2313	22.2101	22.1311	22.6231	21.5818	22.6731	Cluster -2	10	38.5	31.049	0	215.11	9.63807	1.14815e-09
Pg_S6882.6	DNA-binding protein, putative	AT2G03270.1	Q6J5K9	AT2G03270.1 | Symbols: | DNA-binding protein, putative | chr2:994071-995990 FORWARD LENGTH=639	Probable RNA helicase armi OS=Drosophila melanogaster GN=armi PE=1 SV=4	27.6623	27.8266	27.6833	27.6271	29.2953	29.2514	29.2894	29.1747	27.4019	27.4979	27.4761	27.5402	27.623	27.3708	27.6186	27.4764	Cluster -2	4	17	124.61	0	150.06	11.5464	2.56056e-11
Pg_S6078.5	Thioredoxin superfamily protein	AT2G37240.1	Q6PBP3	AT2G37240.1 | Symbols: | Thioredoxin superfamily protein | chr2:15640235-15641720 REVERSE LENGTH=248	Redox-regulatory protein FAM213A OS=Danio rerio GN=fam213a PE=2 SV=2	28.8307	28.9625	28.7833	28.795	30.4528	30.5507	30.4957	30.5523	28.216	28.056	27.9173	27.9284	28.0766	28.0696	28.0116	28.0795	Cluster -2	7	45	24.57	0	160.21	13.129	1.18808e-12
Pg_S5916.2	NDH-dependent cyclic electron flow 1	AT1G15980.1	unknown	AT1G15980.1 | Symbols: NDF1, NDH48 | NDH-dependent cyclic electron flow 1 | chr1:5489314-5491199 FORWARD LENGTH=461	unknown	24.1759	25.1208	24.279	24.0077	26.6525	26.3402	26.6782	26.3781	23.9954	23.4628	21.8256	24.0032	23.7327	23.4156	22.7176	23.5175	Cluster -2	5	14.9	51.542	0	12.257	4.58395	4.32021e-05
Pg_S5747.12	Oxidoreductase, zinc-binding dehydrogenase family protein	AT1G23740.1	B1IZH4	AT1G23740.1 | Symbols: | Oxidoreductase, zinc-binding dehydrogenase family protein | chr1:8398245-8399656 REVERSE LENGTH=386	L-threonine 3-dehydrogenase OS=Escherichia coli (strain ATCC 8739 / DSM 1576 / Crooks) GN=tdh PE=3 SV=1	24.4894	23.9259	23.9748	24.5779	27.5999	27.5466	27.5485	27.7972	23.4459	22.6997	23.562	23.0678	23.4736	22.4943	22.879	24.2052	Cluster -2	2	54.9	9.1425	0	9.2163	7.56103	7.77316e-08
Pg_S4579.13	NDH-dependent cyclic electron flow 1	AT1G15980.1	unknown	AT1G15980.1 | Symbols: NDF1, NDH48 | NDH-dependent cyclic electron flow 1 | chr1:5489314-5491199 FORWARD LENGTH=461	unknown	23.7614	23.6516	23.7783	23.7669	26.8804	27.0022	27.0491	26.8585	22.2029	23.9661	22.5683	23.2357	22.7838	22.9326	23.403	22.8132	Cluster -2	5	16.8	53.621	0	27.227	7.52727	8.36863e-08
Pg_S4477.16	2-cysteine peroxiredoxin B	AT5G06290.1	P44411	AT5G06290.1 | Symbols: 2-Cys Prx B, 2CPB | 2-cysteine peroxiredoxin B | chr5:1919380-1921211 FORWARD LENGTH=273	Putative peroxiredoxin bcp OS=Haemophilus influenzae (strain ATCC 51907 / DSM 11121 / KW20 / Rd) GN=bcp PE=3 SV=1	28.3211	28.1562	28.1227	28.0019	29.9163	29.8891	29.8096	29.8528	27.5992	27.6531	27.7152	27.5663	27.9532	27.9189	27.8374	27.8045	Cluster -2	1	57.6	29.562	0	193.61	12.4962	4.13952e-12
Pg_S4529.2	photosystem II subunit R	AT1G79040.1	Q40070	AT1G79040.1 | Symbols: PSBR | photosystem II subunit R | chr1:29736085-29736781 FORWARD LENGTH=140	Photosystem II 10 kDa polypeptide, chloroplastic OS=Hordeum vulgare GN=PSBR PE=3 SV=1	23.8053	24.5322	23.6005	23.5887	27.5006	27.4737	27.5836	27.6118	23.4642	23.6759	22.4362	24.08	23.3031	21.8907	23.0942	23.7249	Cluster -2	1	16.2	14.042	0	12.145	6.47269	7.63163e-07
Pg_S4021.17	ribosomal protein L12-A	AT3G27830.1	C1F3Y2	AT3G27830.1 | Symbols: RPL12-A, RPL12 | ribosomal protein L12-A | chr3:10318576-10319151 FORWARD LENGTH=191	50S ribosomal protein L7/L12 OS=Acidobacterium capsulatum (strain ATCC 51196 / DSM 11244 / JCM 7670) GN=rplL PE=3 SV=1	23.2256	24.2767	23.1193	24.1608	28.2502	28.2856	28.3096	28.1733	23.2768	22.6682	23.3679	22.8169	23.1408	22.9948	22.9181	23.0023	Cluster -2	4	28	20.084	0	43.636	9.83852	7.65942e-10
Pg_S3535.2	ADP glucose pyrophosphorylase large subunit 1	AT5G19220.1	Q9CHN1	AT5G19220.1 | Symbols: ADG2, APL1 | ADP glucose pyrophosphorylase large subunit 1 | chr5:6463931-6466775 REVERSE LENGTH=522	Glucose-1-phosphate adenylyltransferase OS=Lactococcus lactis subsp. lactis (strain IL1403) GN=glgC PE=3 SV=1	23.4718	23.9164	23.5099	23.911	27.1719	28.0066	28.0208	27.0849	23.3794	23.1849	22.6871	23.7561	22.1068	23.2231	23.5168	23.0607	Cluster -2	1	55.9	57.722	0	23.62	7.56524	7.70559e-08
Pg_S3431.8	unknown	unknown	unknown	unknown	unknown	24.0793	24.3844	23.6336	24.0216	27.4215	27.3997	27.3554	27.3493	22.7886	22.7568	23.6529	22.6051	22.3424	23.5546	22.9354	23.2872	Cluster -2	3	31.5	35.242	0	37.847	8.40721	1.349e-08
Pg_S3181.5	NAD(P)-binding Rossmann-fold superfamily protein	AT1G30620.1	Q31FG4	AT1G30620.1 | Symbols: HSR8, MUR4, UXE1 | NAD(P)-binding Rossmann-fold superfamily protein | chr1:10855496-10857970 FORWARD LENGTH=419	ADP-L-glycero-D-manno-heptose-6-epimerase OS=Thiomicrospira crunogena (strain XCL-2) GN=hldD PE=3 SV=1	26.9483	27.1689	26.9094	27.0067	28.6224	28.6313	28.5596	28.5965	26.5948	26.9833	26.6218	26.7615	26.679	26.7011	26.806	26.8103	Cluster -2	8	43.1	42.091	0	70.165	10.3882	2.596e-10
Pg_S3140.3	thioredoxin M-type 4	AT3G15360.1	P85801	AT3G15360.1 | Symbols: ATHM4, TRX-M4, ATM4 | thioredoxin M-type 4 | chr3:5188448-5189457 FORWARD LENGTH=193	Thioredoxin H-type OS=Populus jackii PE=1 SV=1	24.3649	24.8477	24.4227	24.1151	29.0191	29.0336	28.9738	29.1802	23.562	22.0389	23.188	24.0209	22.9351	22.819	22.8988	22.883	Cluster -2	1	28.9	20.418	0	31.754	9.19075	2.78822e-09
Pg_S2819.15	2-cysteine peroxiredoxin B	AT5G06290.1	P44411	AT5G06290.1 | Symbols: 2-Cys Prx B, 2CPB | 2-cysteine peroxiredoxin B | chr5:1919380-1921211 FORWARD LENGTH=273	Putative peroxiredoxin bcp OS=Haemophilus influenzae (strain ATCC 51907 / DSM 11121 / KW20 / Rd) GN=bcp PE=3 SV=1	29.4537	29.7247	29.6403	29.5701	31.831	31.8709	31.8193	31.8676	29.2523	29.1751	29.2194	29.1944	29.2715	29.3602	29.3077	29.2537	Cluster -2	2	57.8	29.471	0	271.47	14.9125	4.21378e-14
Pg_S2631.6	hydroxypyruvate reductase	AT1G68010.2	P13443	AT1G68010.2 | Symbols: HPR | hydroxypyruvate reductase | chr1:25493418-25495720 FORWARD LENGTH=387	Glycerate dehydrogenase OS=Cucumis sativus GN=HPR-A PE=2 SV=1	23.8873	24.4898	23.4977	23.6093	25.6315	26.2195	26.2518	26.0543	23.9754	22.9511	23.0796	22.8763	23.2835	23.4504	22.5527	23.0997	Cluster -2	3	46.8	59.665	0	15.556	5.9771	2.17596e-06
Pg_S2452.13	haloacid dehalogenase-like hydrolase family protein	AT5G53850.2	C5M5Z6	AT5G53850.2 | Symbols: | haloacid dehalogenase-like hydrolase family protein | chr5:21861155-21864817 REVERSE LENGTH=507	Enolase-phosphatase E1 OS=Candida tropicalis (strain ATCC MYA-3404 / T1) GN=UTR4 PE=3 SV=1	26.5879	26.598	26.6742	26.3411	27.7713	27.651	27.5729	27.7537	26.4438	26.5858	26.5189	26.565	26.4982	26.4285	26.6237	26.3733	Cluster -2	6	24.4	58.217	0	85.017	8.5062	1.10388e-08
Pg_S2015.1	plastid ribosomal protein l11	AT1G32990.1	B9LI29	AT1G32990.1 | Symbols: PRPL11 | plastid ribosomal protein l11 | chr1:11955827-11957139 FORWARD LENGTH=222	50S ribosomal protein L11 OS=Chloroflexus aurantiacus (strain ATCC 29364 / DSM 637 / Y-400-fl) GN=rplK PE=3 SV=1	24.009	24.3156	24.5556	24.8517	27.4168	27.2737	27.298	27.3359	22.4246	22.6832	22.5204	23.2618	23.2291	23.0208	23.1421	23.3415	Cluster -2	3	28.8	16.779	0	11.433	10.2068	3.7215e-10
Pg_S1908.21	Deoxyxylulose-5-phosphate synthase	AT4G15560.1	Q8Z8X3	AT4G15560.1 | Symbols: CLA1, DEF, CLA, DXS, DXPS2 | Deoxyxylulose-5-phosphate synthase | chr4:8884218-8887254 FORWARD LENGTH=717	1-deoxy-D-xylulose-5-phosphate synthase OS=Salmonella typhi GN=dxs PE=3 SV=3	23.479	24.5351	24.5744	23.0413	26.1651	26.4377	26.4196	26.2162	23.4504	23.555	23.1804	23.4927	23.2607	23.3616	23.2874	23.2656	Cluster -2	7	12.8	79.719	0	32.349	6.31496	1.06195e-06
Pg_S1774.22	Albino or Glassy Yellow 1	AT4G01800.2	A6TLE7	AT4G01800.2 | Symbols: AGY1, SECA1 | Albino or Glassy Yellow 1 | chr4:770926-776134 REVERSE LENGTH=1042	Protein translocase subunit SecA 1 OS=Alkaliphilus metalliredigens (strain QYMF) GN=secA1 PE=3 SV=1	21.7738	24.1774	24.0466	23.7352	29.2134	29.077	28.4089	29.5353	23.4212	21.8865	23.607	23.0099	22.4605	22.2045	22.0062	20.8788	Cluster -2	25	33.3	116.98	0	97.589	6.94058	2.83136e-07
Pg_S1664.1	FK506-binding protein 16-2	AT4G39710.1	Q6KBA8	AT4G39710.1 | Symbols: FKBP16-2 | FK506-binding protein 16-2 | chr4:18427249-18428325 REVERSE LENGTH=217	FK506-binding protein 1A OS=Emericella nidulans (strain FGSC A4 / ATCC 38163 / CBS 112.46 / NRRL 194 / M139) GN=fprA PE=3 SV=1	23.5978	23.5561	23.8469	23.308	26.4878	26.469	26.5397	26.418	23.4491	23.1662	22.2962	22.6387	23.0527	23.0726	22.6862	23.3351	Cluster -2	1	20	23.357	0	10.733	8.39956	1.36808e-08
Pg_S6008.5	unknown	unknown	unknown	unknown	unknown	23.5902	24.691	23.6054	23.5646	25.4569	25.442	25.5668	25.0216	22.893	23.3438	22.3199	23.0493	23.0756	23.3775	23.8813	22.6757	Cluster -2	1	12.7	16.82	0	8.09	4.59757	4.19453e-05
Pg_S1204.17	photosystem I P subunit	AT2G46820.1	O04616	AT2G46820.1 | Symbols: PTAC8, TMP14, PSAP, PSI-P | photosystem I P subunit | chr2:19243729-19244870 FORWARD LENGTH=174	Protein CURVATURE THYLAKOID 1A, chloroplastic OS=Arabidopsis thaliana GN=CURT1A PE=1 SV=1	23.6686	23.2836	24.5302	24.3561	26.6983	26.869	26.9472	26.7158	23.0703	22.5385	21.73	23.6829	23.4834	22.7848	23.5201	23.0975	Cluster -2	2	19.2	19.119	0	5.6945	6.09803	1.67946e-06
Pg_S5064.6	Inositol monophosphatase family protein	AT5G63980.1	Q45499	AT5G63980.1 | Symbols: SAL1, ALX8, ATSAL1, HOS2, FRY1, RON1 | Inositol monophosphatase family protein | chr5:25609840-25611802 FORWARD LENGTH=407	Inositol-1-monophosphatase OS=Bacillus subtilis (strain 168) GN=suhB PE=3 SV=1	24.4151	23.6171	23.7744	23.6934	30.5114	29.5902	29.541	30.4925	22.14	22.0409	20.9741	22.7812	21.2459	22.5192	22.993	23.5615	Cluster -2	10	45.6	37.183	0	203.31	8.30226	1.66426e-08
Pg_S0978.10	Alanyl-tRNA synthetase	AT1G50200.1	A2BZG2	AT1G50200.1 | Symbols: ALATS, ACD | Alanyl-tRNA synthetase | chr1:18591429-18598311 REVERSE LENGTH=1003	Alanine--tRNA ligase OS=Prochlorococcus marinus (strain NATL1A) GN=alaS PE=3 SV=1	28.7796	29.0396	28.731	28.7095	29.2087	29.3137	29.2131	29.2868	28.6104	28.7098	28.6219	28.712	28.6266	28.7616	28.6372	28.6983	Cluster -2	12	31.8	109.23	0	157.07	5.61779	4.68924e-06
Pg_S0953.16	ferredoxin/thioredoxin reductase subunit A (variable subunit) 2	AT5G08410.1	P24018	AT5G08410.1 | Symbols: FTRA2 | ferredoxin/thioredoxin reductase subunit A (variable subunit) 2 | chr5:2709974-2710528 REVERSE LENGTH=184	Ferredoxin-thioredoxin reductase, variable chain OS=Synechococcus sp. (strain ATCC 27144 / PCC 6301 / SAUG 1402/1) GN=ftrV PE=1 SV=1	25.5397	24.2333	23.6014	23.8928	28.7478	28.6923	28.6883	28.5602	22.6393	23.1535	22.2717	25.4473	22.9155	23.1361	23.1053	22.1137	Cluster -2	3	39.3	18.511	0	29.623	5.6556	4.33326e-06
Pg_S0925.47	NAD(P)-binding Rossmann-fold superfamily protein	AT1G30620.1	Q31FG4	AT1G30620.1 | Symbols: HSR8, MUR4, UXE1 | NAD(P)-binding Rossmann-fold superfamily protein | chr1:10855496-10857970 FORWARD LENGTH=419	ADP-L-glycero-D-manno-heptose-6-epimerase OS=Thiomicrospira crunogena (strain XCL-2) GN=hldD PE=3 SV=1	23.6222	24.0734	23.6655	22.5712	26.5093	26.435	26.5119	26.5496	22.9543	22.5386	22.5271	23.5734	23.1377	23.6949	23.6987	22.8182	Cluster -2	2	21.2	41.618	0	27.632	6.40323	8.85819e-07
Pg_S2307.13	ribosomal protein 5B	AT2G37270.1	Q9Y265	AT2G37270.1 | Symbols: ATRPS5B, RPS5B | ribosomal protein 5B | chr2:15647883-15649042 REVERSE LENGTH=207	RuvB-like 1 OS=Homo sapiens GN=RUVBL1 PE=1 SV=1	28.3914	28.4037	28.2937	28.2054	29.2863	29.2617	29.3303	29.2931	28.1303	28.1271	28.32	28.3371	28.0784	27.9711	27.9961	27.918	Cluster -2	1	43	23.053	0	110.54	9.69056	1.03347e-09
Pg_S0634.25	NagB/RpiA/CoA transferase-like superfamily protein	AT2G05830.1	C1FKZ3	AT2G05830.1 | Symbols: | NagB/RpiA/CoA transferase-like superfamily protein | chr2:2229759-2231839 FORWARD LENGTH=374	Methylthioribose-1-phosphate isomerase OS=Clostridium botulinum (strain Kyoto / Type A2) GN=mtnA PE=3 SV=1	23.3164	24.9629	24.538	23.0831	26.4151	26.442	26.554	26.5139	24.3563	22.0596	22.0634	21.7716	22.7451	22.6214	22.6878	22.3321	Cluster -2	1	14.1	25.862	0	20.438	4.56431	4.50199e-05
Pg_S6435.1	Ribosomal protein L1p/L10e family	AT3G58660.1	Q9VTP4	AT3G58660.1 | Symbols: | Ribosomal protein L1p/L10e family | chr3:21701574-21702914 FORWARD LENGTH=446	60S ribosomal protein L10a-2 OS=Drosophila melanogaster GN=RpL10Ab PE=1 SV=2	23.6719	22.8523	24.5528	24.5003	28.176	28.153	28.4588	28.3427	21.5458	23.4577	23.5575	23.6388	22.9205	23.7162	23.7777	21.6193	Cluster -2	8	29.1	38.547	0	48.839	5.65886	4.31127e-06
Pg_S0835.4	ATP synthase delta-subunit gene	AT4G09650.1	Q07300	AT4G09650.1 | Symbols: ATPD | ATP synthase delta-subunit gene | chr4:6100799-6101503 FORWARD LENGTH=234	ATP synthase delta chain, chloroplastic OS=Sorghum bicolor GN=ATPD PE=2 SV=1	23.7871	24.6163	24.597	24.2802	27.4404	27.353	27.4185	27.3552	23.2209	22.7883	22.9058	22.6156	23.4981	23.4623	24.1586	21.7246	Cluster -2	5	36.6	26.426	0	34.713	6.41841	8.57382e-07
Pg_S2316.19	63 kDa inner membrane family protein	AT2G28800.1	Q0HD64	AT2G28800.1 | Symbols: ALB3 | 63 kDa inner membrane family protein | chr2:12356669-12359158 REVERSE LENGTH=462	Membrane protein insertase YidC OS=Shewanella sp. (strain MR-4) GN=yidC PE=3 SV=1	23.6687	23.8056	23.5445	24.5006	26.5694	26.7235	26.6622	26.8213	22.4969	23.7166	23.4945	23.8243	23.8938	23.0824	22.8273	22.134	Cluster -2	3	8.1	48.07	0	21.071	5.88082	2.67402e-06
Pg_S0724.24	photosystem I subunit H2	AT1G52230.1	P13352	AT1G52230.1 | Symbols: PSAH2, PSAH-2, PSI-H | photosystem I subunit H2 | chr1:19454902-19455508 FORWARD LENGTH=145	Photosystem I reaction center subunit VI, chloroplastic OS=Chlamydomonas reinhardtii GN=PSAH PE=1 SV=1	23.7895	23.9966	23.7444	23.243	27.5153	27.4846	27.2144	26.9637	22.8799	24.1168	22.3498	23.3008	21.9504	23.2843	23.4658	21.8035	Cluster -2	2	49.3	15.257	0	23.902	6.23856	1.24318e-06
Pg_S0363.30	Protein of unknown function (DUF1118)	AT1G74730.1	unknown	AT1G74730.1 | Symbols: | Protein of unknown function (DUF1118) | chr1:28078995-28079831 FORWARD LENGTH=198	unknown	23.7804	24.702	24.3908	23.801	27.5368	27.625	27.6596	27.5782	24.0231	22.7882	22.4272	23.8802	23.4742	23.3292	23.7689	23.4702	Cluster -2	2	13.1	19.965	0	12.044	7.28788	1.36333e-07
Pg_S0302.45	thylakoid rhodanese-like	AT4G01050.1	Q56XR7	AT4G01050.1 | Symbols: TROL | thylakoid rhodanese-like | chr4:455874-458175 FORWARD LENGTH=466	Rhodanese-like domain-containing protein 4A, chloroplastic OS=Arabidopsis thaliana GN=STR4A PE=2 SV=1	24.0331	23.8681	24.264	25.111	28.0447	28.1352	28.0254	28.117	22.8746	23.4817	22.7436	24.7195	24.1947	23.0127	24.1815	23.5914	Cluster -2	6	25.9	46.836	0	50.974	6.39545	8.98355e-07
Pg_S0015.3	Rhodanese/Cell cycle control phosphatase superfamily protein	AT1G17850.2	Q1QPC1	AT1G17850.2 | Symbols: | Rhodanese/Cell cycle control phosphatase superfamily protein | chr1:6146470-6148820 REVERSE LENGTH=448	UPF0176 protein Nham_1078 OS=Nitrobacter hamburgensis (strain X14 / DSM 10229) GN=Nham_1078 PE=3 SV=1	23.1955	23.9007	23.3261	23.4773	26.956	26.9409	26.8654	26.9154	21.9941	24.4424	21.8229	22.3445	22.833	23.8373	22.4942	21.6631	Cluster -2	3	54.1	53.264	0	16.407	4.93749	2.01082e-05
Pg_S0034.1	NAD(P)H dehydrogenase subunit H	ATCG01110.1	Q5HB88	ATCG01110.1 | Symbols: NDHH | NAD(P)H dehydrogenase subunit H | chrC:122011-123192 REVERSE LENGTH=393	NADH-quinone oxidoreductase subunit D OS=Ehrlichia ruminantium (strain Welgevonden) GN=nuoD PE=3 SV=1	24.4166	24.398	23.7013	23.8795	27.3222	27.6442	27.6375	27.7155	23.0572	23.6116	22.8861	23.6853	23.2781	23.4893	22.728	23.3225	Cluster -2	8	33.7	32.469	0	25.336	9.17717	2.8639e-09
Pg_S6120.8	NAD(P)-binding Rossmann-fold superfamily protein	AT1G30620.1	Q31FG4	AT1G30620.1 | Symbols: HSR8, MUR4, UXE1 | NAD(P)-binding Rossmann-fold superfamily protein | chr1:10855496-10857970 FORWARD LENGTH=419	ADP-L-glycero-D-manno-heptose-6-epimerase OS=Thiomicrospira crunogena (strain XCL-2) GN=hldD PE=3 SV=1	22.932	24.5671	23.465	23.6935	25.8719	25.1109	25.9029	26.0925	24.145	23.1524	23.3273	23.8	23.5296	24.1524	23.364	24.0169	Cluster -2	3	15.6	36.23	0	7.5959	3.91153	0.000186534
Pg_S6120.6	NAD(P)-binding Rossmann-fold superfamily protein	AT1G30620.1	Q31FG4	AT1G30620.1 | Symbols: HSR8, MUR4, UXE1 | NAD(P)-binding Rossmann-fold superfamily protein | chr1:10855496-10857970 FORWARD LENGTH=419	ADP-L-glycero-D-manno-heptose-6-epimerase OS=Thiomicrospira crunogena (strain XCL-2) GN=hldD PE=3 SV=1	23.9289	23.401	22.7941	24.663	27.6752	27.6838	27.7025	27.5137	22.9344	23.4949	22.72	23.2855	23.2665	23.7022	22.4169	23.7054	Cluster -2	8	45.6	35.485	0	29.538	7.0043	2.48522e-07
Pg_S4541.1	glutamate-1-semialdehyde 2,1-aminomutase 2	AT3G48730.1	A0KZS6	AT3G48730.1 | Symbols: GSA2 | glutamate-1-semialdehyde 2,1-aminomutase 2 | chr3:18049697-18051550 FORWARD LENGTH=472	Glutamate-1-semialdehyde 2,1-aminomutase OS=Shewanella sp. (strain ANA-3) GN=hemL PE=3 SV=1	23.0124	24.4504	23.6272	24.9628	27.6153	27.6032	27.5513	27.5737	23.1574	22.3996	22.6847	22.5861	24.0594	24.254	22.6185	23.8614	Cluster -2	1	61.5	48.672	0	20.871	6.42303	8.49628e-07
Pg_S4493.1	UDP-Glycosyltransferase superfamily protein	AT4G01070.1	P34317	AT4G01070.1 | Symbols: GT72B1, UGT72B1 | UDP-Glycosyltransferase superfamily protein | chr4:461858-463300 REVERSE LENGTH=480	Putative UDP-glucuronosyltransferase ugt-60 OS=Caenorhabditis elegans GN=ugt-60 PE=3 SV=2	24.202	23.773	23.87	24.7469	28.2562	28.4074	28.3069	28.2743	24.2146	22.5099	23.762	22.2941	22.7841	25.6026	22.0847	25.4974	Cluster -2	2	35.6	53.374	0	13.011	4.16162	0.000108231
Pg_S6131.1	Ribosomal protein L19 family protein	AT4G11630.1	C5CAH1	AT4G11630.1 | Symbols: | Ribosomal protein L19 family protein | chr4:7019793-7021068 FORWARD LENGTH=225	50S ribosomal protein L19 OS=Micrococcus luteus (strain ATCC 4698 / DSM 20030 / JCM 1464 / NBRC 3333 / NCIMB 9278 / NCTC 2665 / VKM Ac-2230) GN=rplS PE=3 SV=1	24.1405	24.4234	24.3266	25.1993	27.5993	28.0206	27.9164	27.2278	23.7919	24.5685	24.1969	22.8281	23.0204	25.7157	24.2163	22.5272	Cluster -2	3	11.1	26.219	0	13.706	4.056	0.000135964
Pg_S2873.13	chloroplast ribosomal protein S4	ATCG00380.1	P48270	ATCG00380.1 | Symbols: RPS4 | chloroplast ribosomal protein S4 | chrC:45223-45828 REVERSE LENGTH=201	30S ribosomal protein S4, chloroplastic OS=Chlamydomonas reinhardtii GN=rps4 PE=1 SV=1	24.908	23.5196	24.8053	24.5222	28.8208	28.8546	28.8582	28.8154	24.3709	22.6787	22.8594	22.352	22.555	24.7974	23.622	22.7854	Cluster -2	9	49.3	23.312	0	43.75	6.35922	9.67553e-07
Pg_S6874.1	GTP-binding protein-related	AT1G56050.1	Q71ZD3	AT1G56050.1 | Symbols: | GTP-binding protein-related | chr1:20963793-20966181 FORWARD LENGTH=421	GTPase Obg OS=Listeria monocytogenes serotype 4b (strain F2365) GN=obg PE=3 SV=1	24.0268	24.412	24.2177	25.2005	25.9032	26.0613	26.7114	27.0173	24.9548	24.9822	23.8026	23.5389	23.3466	24.6181	23.4489	24.6678	Cluster -2	6	20	40.207	0	20.744	3.14691	0.000977466
Pg_S1678.43	NAD(P)-binding Rossmann-fold superfamily protein	AT1G30620.1	Q31FG4	AT1G30620.1 | Symbols: HSR8, MUR4, UXE1 | NAD(P)-binding Rossmann-fold superfamily protein | chr1:10855496-10857970 FORWARD LENGTH=419	ADP-L-glycero-D-manno-heptose-6-epimerase OS=Thiomicrospira crunogena (strain XCL-2) GN=hldD PE=3 SV=1	24.6026	22.9858	24.0913	24.3317	26.3076	26.1268	26.1797	26.2875	23.9667	23.4472	23.2866	23.3298	22.7131	23.7039	21.6812	23.8421	Cluster -2	3	11	39.111	0	8.4218	4.24551	9.01996e-05
Pg_S1185.56	Glutathione S-transferase family protein	AT5G42150.1	unknown	AT5G42150.1 | Symbols: | Glutathione S-transferase family protein | chr5:16846247-16847909 FORWARD LENGTH=315	unknown	23.9569	23.6927	23.5502	24.0364	26.4524	26.5209	26.6702	26.629	24.5247	23.7888	23.724	22.1884	24.0005	23.3979	22.5232	23.2225	Cluster -2	1	24.7	46.947	0	26.997	4.8639	2.35241e-05
Pg_S0810.52	serine carboxypeptidase-like 34	AT5G23210.1	Q752M5	AT5G23210.1 | Symbols: SCPL34 | serine carboxypeptidase-like 34 | chr5:7810892-7814837 FORWARD LENGTH=499	Pheromone-processing carboxypeptidase KEX1 OS=Ashbya gossypii (strain ATCC 10895 / CBS 109.51 / FGSC 9923 / NRRL Y-1056) GN=KEX1 PE=3 SV=1	23.3639	23.3133	23.7249	24.8583	25.9213	25.9598	25.8889	25.723	24.5022	22.6576	23.0895	22.9283	22.7368	24.2616	23.6229	22.9824	Cluster -2	3	15.1	54.061	0	16.813	3.48029	0.000472684
Pg_S0662.26	Late embryogenesis abundant (LEA) hydroxyproline-rich glycoprotein family	AT2G27260.1	Q9SJ52	AT2G27260.1 | Symbols: | Late embryogenesis abundant (LEA) hydroxyproline-rich glycoprotein family | chr2:11669769-11670500 FORWARD LENGTH=243	Protein YLS9 OS=Arabidopsis thaliana GN=YLS9 PE=2 SV=1	23.647	23.1724	23.6226	24.6901	25.2282	25.2687	25.2109	25.2966	23.7992	23.988	22.5492	23.0933	23.4253	24.058	23.7938	23.6295	Cluster -2	2	19.3	19.638	0	13.282	3.21163	0.000848166
Pg_S3864.6	ribosomal protein L4	AT1G07320.1	P60728	AT1G07320.1 | Symbols: RPL4 | ribosomal protein L4 | chr1:2249190-2250189 FORWARD LENGTH=282	50S ribosomal protein L4 OS=Mycobacterium bovis (strain ATCC BAA-935 / AF2122/97) GN=rplD PE=3 SV=1	23.1394	24.8284	24.3917	25.2799	27.7981	27.9391	28.5896	27.7471	22.9793	22.9673	24.4583	22.7357	22.9845	26.1832	23.0763	24.2135	Cluster -2	6	25.4	31.205	0	38.549	4.04701	0.000138661
Pg_S0536.31	elongation factor P (EF-P) family protein	AT3G08740.1	Q2FY41	AT3G08740.1 | Symbols: | elongation factor P (EF-P) family protein | chr3:2654788-2656154 REVERSE LENGTH=236	Elongation factor P OS=Staphylococcus aureus (strain NCTC 8325) GN=efp PE=3 SV=1	23.938	24.2788	23.308	24.5598	27.3943	27.4235	27.4019	27.3603	23.2117	23.3262	23.2785	22.3477	23.1098	24.9617	23.5836	24.0173	Cluster -2	4	17.3	26.275	0	10.775	6.43148	8.33903e-07
Pg_S0263.48	ACD1-like	AT4G25650.2	Q44256	AT4G25650.2 | Symbols: ACD1-LIKE, PTC52, TIC55-IV | ACD1-like | chr4:13081021-13083153 REVERSE LENGTH=559	3-chlorobenzoate-3,4-dioxygenase oxygenase subunit OS=Comamonas testosteroni GN=cbaA PE=3 SV=1	23.8546	23.2371	24.6703	24.1284	24.9053	24.9728	25.6162	25.5543	23.8583	22.6429	22.7344	22.0805	23.2045	23.7183	22.3473	22.8387	Cluster -2	1	27.4	25.924	0	15.685	3.53397	0.000421464
Pg_S0390.12	ribosomal protein L14	ATCG00780.1	A1E9M6	ATCG00780.1 | Symbols: RPL14 | ribosomal protein L14 | chrC:80696-81064 REVERSE LENGTH=122	30S ribosomal protein S8, chloroplastic OS=Hordeum vulgare GN=rps8 PE=3 SV=1	24.2966	24.9739	23.7356	23.9459	28.9545	28.9751	28.8186	28.918	24.4736	23.0489	22.9755	23.4942	22.91	25.7547	22.6392	23.1267	Cluster -2	1	33.3	18.234	0	27.6	5.64339	4.43886e-06
Pg_S8559.1	phosphate transporter 2;1	AT3G26570.1	Q50173	AT3G26570.1 | Symbols: PHT2;1, ORF02 | phosphate transporter 2;1 | chr3:9756261-9758413 FORWARD LENGTH=613	Probable low-affinity inorganic phosphate transporter OS=Mycobacterium leprae (strain TN) GN=pit PE=3 SV=1	23.0099	22.8261	23.5499	23.9317	26.082	26.0657	26.1505	26.2102	23.6231	23.3884	23.2081	23.9295	22.9995	23.8562	22.9414	23.615	Cluster -2	2	8.5	61.164	0	13.777	6.46274	7.79014e-07
Pg_S4754.3	unknown	unknown	unknown	unknown	unknown	23.6178	22.8367	25.3339	23.1804	27.1844	27.4128	27.4355	27.3565	23.5304	23.5369	22.2301	22.669	23.6831	23.802	23.6729	23.628	Cluster -2	5	26.8	30.799	0	35.334	5.61624	4.69973e-06
Pg_S4590.14	non-intrinsic ABC protein 7	AT3G10670.1	Q720M2	AT3G10670.1 | Symbols: ATNAP7, NAP7 | non-intrinsic ABC protein 7 | chr3:3335325-3337304 REVERSE LENGTH=338	Putative ABC transporter ATP-binding protein LMOf2365_1216 OS=Listeria monocytogenes serotype 4b (strain F2365) GN=LMOf2365_1216 PE=3 SV=1	23.7141	23.9477	25.5709	25.5717	28.6007	28.529	28.5618	28.3459	24.4918	24.0121	24.5291	24.3647	26.066	24.9729	24.9258	24.6097	Cluster -2	8	31.6	34.551	0	28.931	5.76446	3.43532e-06
Pg_S4394.16	peroxisomal NAD-malate dehydrogenase 1	AT2G22780.1	Q88Q44	AT2G22780.1 | Symbols: PMDH1 | peroxisomal NAD-malate dehydrogenase 1 | chr2:9689995-9691923 REVERSE LENGTH=354	Probable malate dehydrogenase OS=Pseudomonas putida (strain KT2440) GN=mdh PE=3 SV=1	27.6138	27.5827	27.5714	27.3517	30.7537	30.773	30.7948	30.5603	27.5772	27.5144	27.7882	27.7104	28.0829	28.0453	28.0291	28.0689	Cluster -2	5	64.4	37.278	0	219.69	13.5383	5.54903e-13
Pg_S4217.5	chloroplast heat shock protein 70-2	AT5G49910.1	P0CS91	AT5G49910.1 | Symbols: CPHSC70-2EAT SHOCK PROTEIN 70-2, HSC70-7, cpHsc70-2 | chloroplast heat shock protein 70-2 | chr5:20303470-20306295 FORWARD LENGTH=718	Heat shock protein SSC1, mitochondrial OS=Saccharomyces cerevisiae GN=SSC1 PE=1 SV=1	31.0662	31.027	31.1376	31.0706	32.5748	32.5925	32.6214	32.5264	31.22	31.161	31.1594	31.1691	31.139	31.1532	31.14	31.1871	Cluster -2	9	40.1	75.695	0	323.31	15.2531	2.27564e-14
Pg_S4053.7	31-kDa RNA binding protein	AT4G24770.1	Q925G0	AT4G24770.1 | Symbols: RBP31, ATRBP31, CP31, ATRBP33 | 31-kDa RNA binding protein | chr4:12766223-12767952 REVERSE LENGTH=329	Putative RNA-binding protein 3 OS=Rattus norvegicus GN=Rbm3 PE=1 SV=2	24.0684	23.5134	24.6739	22.6751	28.5273	28.0869	28.5774	28.3456	24.6327	24.6273	24.5057	24.0729	24.6823	24.624	24.338	24.5854	Cluster -2	2	50.5	32.695	0	53.11	7.52585	8.37939e-08
Pg_S3250.1	Aldolase-type TIM barrel family protein	AT5G13420.1	Q255E4	AT5G13420.1 | Symbols: | Aldolase-type TIM barrel family protein | chr5:4302080-4304212 REVERSE LENGTH=438	Transaldolase OS=Chlamydophila felis (strain Fe/C-56) GN=tal PE=3 SV=1	23.701	22.3813	24.3567	23.7248	27.8584	26.9866	26.9094	27.0723	23.3097	22.1311	23.9598	22.7999	23.5997	23.6137	25.1285	22.9967	Cluster -2	2	61	40.565	0	36.391	4.70703	3.30323e-05
Pg_S2579.11	DEAD box RNA helicase (RH3)	AT5G26742.2	Q3BNH8	AT5G26742.2 | Symbols: emb1138 | DEAD box RNA helicase (RH3) | chr5:9285540-9288871 REVERSE LENGTH=748	ATP-dependent RNA helicase RhlB OS=Xanthomonas campestris pv. vesicatoria (strain 85-10) GN=rhlB PE=3 SV=1	23.5016	22.5911	24.021	22.6102	28.739	28.8335	28.6194	28.4895	23.0605	23.9924	22.8339	23.4985	24.3097	23.2727	23.7115	23.5215	Cluster -2	9	30.9	85.885	0	77.506	8.36882	1.45445e-08
Pg_S2295.16	TCP-1/cpn60 chaperonin family protein	AT3G18190.1	Q6NF74	AT3G18190.1 | Symbols: | TCP-1/cpn60 chaperonin family protein | chr3:6232226-6233836 FORWARD LENGTH=536	60 kDa chaperonin 2 OS=Corynebacterium diphtheriae (strain ATCC 700971 / NCTC 13129 / Biotype gravis) GN=groL2 PE=3 SV=1	23.1784	22.9961	24.3688	23.6553	27.7777	27.8869	27.7938	27.8514	23.9013	23.7828	22.6413	23.8634	24.4114	24.5679	24.8536	24.6674	Cluster -2	3	54.8	64.412	0	13.997	7.60003	7.15621e-08
Pg_S0804.56	chlorophyll A/B binding protein 1	AT1G29930.1	Q9XF88	AT1G29930.1 | Symbols: CAB1, AB140, CAB140, LHCB1.3 | chlorophyll A/B binding protein 1 | chr1:10478071-10478874 FORWARD LENGTH=267	Chlorophyll a-b binding protein CP29.2, chloroplastic OS=Arabidopsis thaliana GN=LHCB4.2 PE=1 SV=1	23.0939	23.8849	24.1664	22.0129	27.2335	27.2789	27.3421	27.4273	24.2575	23.588	23.2998	22.2177	23.8672	23.4353	23.7165	23.2804	Cluster -2	2	44.3	28.105	0	15.816	5.53003	5.65948e-06
Pg_S0606.17	2-oxoacid dehydrogenases acyltransferase family protein	AT3G06850.1	Q73WX4	AT3G06850.1 | Symbols: BCE2, LTA1, DIN3 | 2-oxoacid dehydrogenases acyltransferase family protein | chr3:2158212-2160465 REVERSE LENGTH=483	Multifunctional 2-oxoglutarate metabolism enzyme OS=Mycobacterium paratuberculosis (strain ATCC BAA-968 / K-10) GN=kgd PE=3 SV=1	24.8527	23.5197	24.9505	24.3948	25.6438	25.8392	25.8571	25.6887	24.427	23.9855	24.5999	24.4577	24.7099	24.9158	24.7524	24.4189	Cluster -2	2	11.7	49.014	0	6.524	3.21253	0.000846799
Pg_S0008.35	sedoheptulose-bisphosphatase	AT3G55800.1	Q2J1K3	AT3G55800.1 | Symbols: SBPASE | sedoheptulose-bisphosphatase | chr3:20709640-20711421 FORWARD LENGTH=393	Fructose-1,6-bisphosphatase class 1 OS=Rhodopseudomonas palustris (strain HaA2) GN=fbp PE=3 SV=1	24.0241	22.4007	24.5631	22.2211	27.9749	27.8632	27.951	27.8919	23.0983	22.7963	23.5396	22.3976	22.5158	23.4453	23.8328	23.4072	Cluster -2	1	49.9	42.433	0	24.061	6.18812	1.38293e-06
Pg_S0318.64	NAD(P)-binding Rossmann-fold superfamily protein	AT1G30620.1	Q31FG4	AT1G30620.1 | Symbols: HSR8, MUR4, UXE1 | NAD(P)-binding Rossmann-fold superfamily protein | chr1:10855496-10857970 FORWARD LENGTH=419	ADP-L-glycero-D-manno-heptose-6-epimerase OS=Thiomicrospira crunogena (strain XCL-2) GN=hldD PE=3 SV=1	28.5145	28.4876	28.7165	28.5672	29.5103	29.485	29.5664	29.5187	28.5927	28.6972	28.7026	28.6581	28.7357	28.8544	28.7613	28.7226	Cluster -2	4	36.5	34.161	0	79.556	9.36917	1.94275e-09
Pg_S6970.4	ketol-acid reductoisomerase	AT3G58610.1	B2IHY4	AT3G58610.1 | Symbols: | ketol-acid reductoisomerase | chr3:21671561-21674639 FORWARD LENGTH=591	Ketol-acid reductoisomerase OS=Beijerinckia indica subsp. indica (strain ATCC 9039 / DSM 1715 / NCIB 8712) GN=ilvC PE=3 SV=1	30.3393	30.3217	30.2664	30.1914	31.161	31.1834	31.1838	31.2497	30.0137	30.0005	30.0345	29.9271	30.2156	30.1765	30.1472	30.2189	Cluster -2	8	63.3	60.13	0	323.31	12.0978	8.95619e-12
Pg_S6573.1	Uroporphyrinogen decarboxylase	AT3G14930.1	Q1CN66	AT3G14930.1 | Symbols: HEME1 | Uroporphyrinogen decarboxylase | chr3:5020675-5022577 FORWARD LENGTH=418	Uroporphyrinogen decarboxylase OS=Yersinia pestis bv. Antiqua (strain Nepal516) GN=hemE PE=3 SV=1	23.4381	23.9794	24.0765	24.2349	28.303	28.118	28.0283	28.045	24.1269	22.648	23.7445	22.4182	24.3857	24.1655	24.4783	24.3327	Cluster -2	1	19.2	44.813	0	51.455	7.80415	4.67371e-08
Pg_S6397.1	GDSL-like Lipase/Acylhydrolase superfamily protein	AT1G29660.1	P10978	AT1G29660.1 | Symbols: | GDSL-like Lipase/Acylhydrolase superfamily protein | chr1:10371955-10373624 FORWARD LENGTH=364	Retrovirus-related Pol polyprotein from transposon TNT 1-94 OS=Nicotiana tabacum PE=2 SV=1	22.9975	23.9087	23.6789	24.4857	28.0201	28.0014	28.1841	28.3611	23.0745	23.5883	23.0655	24.2229	24.3801	24.5198	24.602	24.5855	Cluster -2	6	20.6	39.703	0	24.987	8.11373	2.45831e-08
Pg_S6181.10	magnesium-chelatase subunit chlH, chloroplast, putative / Mg-protoporphyrin IX chelatase, putative (CHLH)	AT5G13630.1	Q58318	AT5G13630.1 | Symbols: GUN5, CCH, CHLH, CCH1, ABAR | magnesium-chelatase subunit chlH, chloroplast, putative / Mg-protoporphyrin IX chelatase, putative (CHLH) | chr5:4387567-4392082 REVERSE LENGTH=1381	Uncharacterized protein MJ0908 OS=Methanocaldococcus jannaschii (strain ATCC 43067 / DSM 2661 / JAL-1 / JCM 10045 / NBRC 100440) GN=MJ0908 PE=3 SV=1	23.9206	24.6017	24.3371	26.152	28.5585	29.3899	29.2851	29.9205	23.5393	22.8926	23.0701	23.0674	23.4423	23.806	25.2743	25.3728	Cluster -2	25	25.3	153.31	0	101.36	6.29423	1.10764e-06
Pg_S5983.1	unknown	unknown	unknown	unknown	unknown	22.0185	24.7684	23.8685	24.281	28.8731	29.0303	28.8903	28.787	22.3641	23.7128	22.8915	23.3703	23.2133	23.693	24.3597	24.3094	Cluster -2	9	39.4	37.531	0	116.71	6.56059	6.3275e-07
Pg_S5747.14	Oxidoreductase, zinc-binding dehydrogenase family protein	AT1G23740.1	B1IZH4	AT1G23740.1 | Symbols: | Oxidoreductase, zinc-binding dehydrogenase family protein | chr1:8398245-8399656 REVERSE LENGTH=386	L-threonine 3-dehydrogenase OS=Escherichia coli (strain ATCC 8739 / DSM 1576 / Crooks) GN=tdh PE=3 SV=1	24.5792	24.3151	24.8828	24.7074	28.5422	28.5267	28.5345	28.4475	24.0318	23.8038	23.9421	23.9793	24.2145	24.3839	24.3017	24.3153	Cluster -2	3	65.4	28.414	0	58.728	13.905	2.77868e-13
Pg_S5342.1	allene oxide synthase	AT5G42650.1	Q9V776	AT5G42650.1 | Symbols: AOS, CYP74A, DDE2 | allene oxide synthase | chr5:17097803-17099359 REVERSE LENGTH=518	Probable cytochrome P450 317a1 OS=Drosophila melanogaster GN=Cyp317a1 PE=3 SV=2	23.6425	23.4472	22.9288	24.1942	29.2917	29.0464	28.8845	28.8673	23.1206	24.0833	24.2476	22.8779	23.8075	23.7005	23.8683	24.6764	Cluster -2	5	41	57.683	0	150.59	8.39423	1.38333e-08
Pg_S5158.12	phosphoglycerate kinase 1	AT3G12780.1	C5BV35	AT3G12780.1 | Symbols: PGK1 | phosphoglycerate kinase 1 | chr3:4061127-4063140 REVERSE LENGTH=481	Phosphoglycerate kinase OS=Beutenbergia cavernae (strain ATCC BAA-8 / DSM 12333 / NBRC 16432) GN=pgk PE=3 SV=1	27.7882	27.8257	27.8801	27.7281	30.8617	30.9549	30.9373	31.2994	27.6103	27.6557	27.7618	27.67	28.3058	28.3131	28.4208	28.3198	Cluster -2	6	63.8	56.255	0	101.31	13.3434	7.81262e-13
Pg_S4883.6	nuclear encoded CLP protease 5	AT1G02560.1	Q493F8	AT1G02560.1 | Symbols: CLPP5, NCLPP5, NCLPP1 | nuclear encoded CLP protease 5 | chr1:538000-539805 FORWARD LENGTH=298	ATP-dependent Clp protease proteolytic subunit OS=Blochmannia pennsylvanicus (strain BPEN) GN=clpP PE=3 SV=1	24.4625	26.1552	25.4146	26.3681	29.1132	29.4	29.5051	29.3331	25.9101	25.3518	26.0707	25.7934	25.2344	25.6222	25.5587	25.5308	Cluster -2	5	26.9	31.943	0	44.115	6.84922	3.4385e-07
Pg_S2891.3	Phosphoglycerate kinase family protein	AT1G56190.1	P68897	AT1G56190.1 | Symbols: | Phosphoglycerate kinase family protein | chr1:21028403-21030454 FORWARD LENGTH=478	Phosphoglycerate kinase OS=Streptococcus pyogenes serotype M1 GN=pgk PE=3 SV=2	30.4871	30.5184	30.3453	30.5127	33.6993	33.6973	33.6608	33.6722	30.2261	30.2422	30.1647	30.0616	30.7707	30.8794	30.8222	30.8007	Cluster -2	6	66.1	52.804	0	323.31	16.4703	2.57897e-15
Pg_S3187.10	ABC-2 type transporter family protein	AT3G21090.1	Q62K72	AT3G21090.1 | Symbols: | ABC-2 type transporter family protein | chr3:7391497-7394933 REVERSE LENGTH=691	Nod factor export ATP-binding protein I OS=Burkholderia mallei (strain ATCC 23344) GN=nodI PE=3 SV=2	24.1946	23.9585	24.2351	24.1917	25.6801	26.1534	27.3491	26.2336	23.77	24.0488	24.2028	24.1103	24.4945	23.6886	24.5088	24.4787	Cluster -2	7	16.7	76.102	0	22.045	4.92311	2.07232e-05
Pg_S2636.21	membrane protein, putative	AT1G32080.1	P42102	AT1G32080.1 | Symbols: | membrane protein, putative | chr1:11537572-11539756 REVERSE LENGTH=512	Uncharacterized protein YxaC OS=Bacillus subtilis (strain 168) GN=yxaC PE=3 SV=4	23.2474	22.7005	24.0812	24.3522	26.9274	27.629	27.5251	27.5039	22.7221	23.233	23.5504	23.0526	23.1796	24.0338	23.9718	23.8812	Cluster -2	3	9	63.823	0	39.669	6.95629	2.74007e-07
Pg_S2611.4	carbonic anhydrase 1	AT3G01500.2	P9WPJ8	AT3G01500.2 | Symbols: CA1 | carbonic anhydrase 1 | chr3:194853-197873 REVERSE LENGTH=347	Carbonic anhydrase 2 OS=Mycobacterium tuberculosis (strain CDC 1551 / Oshkosh) GN=mtcA2 PE=3 SV=1	24.2573	24.2918	22.9835	24.5601	32.5326	31.6638	31.7022	32.4604	21.425	22.5198	21.5994	23.9027	26.0389	23.3608	23.2032	23.6584	Cluster -2	3	61.1	36.533	0	104.84	7.51169	8.61572e-08
Pg_S2534.12	S-adenosylmethionine carrier 1	AT4G39460.1	Q19529	AT4G39460.1 | Symbols: SAMC1, SAMT1 | S-adenosylmethionine carrier 1 | chr4:18356093-18358596 REVERSE LENGTH=325	Probable calcium-binding mitochondrial carrier F17E5.2 OS=Caenorhabditis elegans GN=F17E5.2 PE=3 SV=4	22.3282	23.8467	23.7832	22.5841	27.9319	27.6668	27.8591	27.6695	23.0602	23.1256	23.5376	23.5429	23.4785	23.6027	23.6018	23.3503	Cluster -2	1	43.9	34.542	0	55.341	8.2691	1.78193e-08
Pg_S2507.9	RNA-binding (RRM/RBD/RNP motifs) family protein	AT4G14300.1	Q6GLB5	AT4G14300.1 | Symbols: | RNA-binding (RRM/RBD/RNP motifs) family protein | chr4:8231179-8232785 FORWARD LENGTH=411	ELAV-like protein 1 OS=Xenopus tropicalis GN=elavl1 PE=2 SV=1	24.0034	24.4385	23.3511	24.5258	27.0115	27.5371	27.4637	26.9611	23.2085	23.1135	22.6747	23.138	23.6759	23.7594	23.4059	25.2763	Cluster -2	5	30.5	32.739	0	52.65	6.15731	1.47915e-06
Pg_S7284.3	Ribosomal protein L14p/L23e family protein	AT3G04400.1	P58139	AT3G04400.1 | Symbols: emb2171 | Ribosomal protein L14p/L23e family protein | chr3:1167339-1168308 FORWARD LENGTH=140	50S ribosomal protein L14, plastid OS=Euglena longa GN=rpl14 PE=3 SV=1	27.8796	27.7009	27.7859	27.8791	28.9408	28.8333	28.9231	28.8248	27.5489	27.6566	27.5733	27.5469	27.8778	27.7134	27.7069	27.8005	Cluster -2	6	48.6	15.015	0	44.05	10.5895	1.72784e-10
Pg_S2326.10	Haloacid dehalogenase-like hydrolase (HAD) superfamily protein	AT4G26190.1	unknown	AT4G26190.1 | Symbols: | Haloacid dehalogenase-like hydrolase (HAD) superfamily protein | chr4:13262473-13266282 REVERSE LENGTH=1057	unknown	22.299	23.7322	23.2961	23.4658	28.5226	29.4387	29.0376	29.3195	21.5328	22.8379	23.7009	22.4907	22.4659	22.9305	24.3511	24.1966	Cluster -2	1	32.4	29.619	0	55.68	6.95903	2.72521e-07
Pg_S2190.6	chloroplastic drought-induced stress protein of 32 kD	AT1G76080.1	Q9SGS4	AT1G76080.1 | Symbols: ATCDSP32, CDSP32 | chloroplastic drought-induced stress protein of 32 kD | chr1:28548063-28549348 REVERSE LENGTH=302	Thioredoxin-like protein CDSP32, chloroplastic OS=Arabidopsis thaliana GN=CDSP32 PE=1 SV=1	22.6603	23.818	23.3956	23.6129	28.6128	29.0123	28.9993	28.9176	23.5602	22.3381	23.5593	22.2469	22.9475	24.6543	24.4269	24.6502	Cluster -2	1	41	34.881	0	70.926	7.48748	9.04832e-08
Pg_S2371.7	CCR-like	AT3G26740.1	Q03200	AT3G26740.1 | Symbols: CCL | CCR-like | chr3:9827868-9828461 FORWARD LENGTH=141	Light-regulated protein OS=Oryza sativa subsp. japonica GN=LIR1 PE=2 SV=1	23.8017	23.9221	24.7075	24.623	28.6647	28.6846	28.7723	28.5947	23.1142	21.7437	23.7837	23.732	24.0164	24.6961	24.2623	22.4952	Cluster -2	1	12.8	14.275	0	70.41	6.30995	1.07148e-06
Pg_S1779.7	ethylene-dependent gravitropism-deficient and yellow-green-like 2	AT5G05740.1	Q9LMU1	AT5G05740.1 | Symbols: ATEGY2, EGY2 | ethylene-dependent gravitropism-deficient and yellow-green-like 2 | chr5:1724023-1726859 REVERSE LENGTH=556	Probable zinc metallopeptidase EGY3, chloroplastic OS=Arabidopsis thaliana GN=EGY3 PE=2 SV=1	23.6851	24.5606	24.4662	24.4077	26.9996	26.698	27.0403	27.7528	22.9988	23.7883	23.7337	24.4688	23.9227	24.0478	24.5138	24.3125	Cluster -2	2	18	58.523	0	25.129	6.23067	1.26223e-06
Pg_S3833.3	ATPase, F1 complex, gamma subunit protein	AT4G04640.1	Q5QZI5	AT4G04640.1 | Symbols: ATPC1 | ATPase, F1 complex, gamma subunit protein | chr4:2350761-2351882 REVERSE LENGTH=373	ATP synthase gamma chain OS=Idiomarina loihiensis (strain ATCC BAA-735 / DSM 15497 / L2-TR) GN=atpG PE=3 SV=1	23.8083	23.8973	25.0388	23.4435	29.2246	29.2645	29.3558	29.4331	23.0005	23.4201	23.1427	23.6867	24.9693	22.2068	23.7979	24.4434	Cluster -2	6	52.9	41.467	0	51.735	6.87559	3.25779e-07
Pg_S1703.39	ADP glucose pyrophosphorylase large subunit 1	AT5G19220.1	Q9CHN1	AT5G19220.1 | Symbols: ADG2, APL1 | ADP glucose pyrophosphorylase large subunit 1 | chr5:6463931-6466775 REVERSE LENGTH=522	Glucose-1-phosphate adenylyltransferase OS=Lactococcus lactis subsp. lactis (strain IL1403) GN=glgC PE=3 SV=1	24.353	23.858	23.7385	24.2173	30.7262	30.6798	30.6738	30.8502	23.2236	22.5427	22.2119	24.6314	25.163	24.6889	23.8302	24.0542	Cluster -2	3	55.9	57.794	0	200.68	8.4811	1.15863e-08
Pg_S1555.3	photosystem II reaction center protein B	ATCG00680.1	Q0P3P9	ATCG00680.1 | Symbols: PSBB | photosystem II reaction center protein B | chrC:72371-73897 FORWARD LENGTH=508	Photosystem II reaction center protein T OS=Ostreococcus tauri GN=psbT PE=3 SV=1	25.0846	23.2894	24.8514	23.3727	30.0014	30.0519	30.1965	29.9442	22.6408	22.3611	22.7521	22.0639	23.0829	23.2414	23.9212	23.6556	Cluster -2	2	26.7	39.989	0	8.7905	9.23676	2.53828e-09
Pg_S1400.14	ribosomal protein S1	AT5G30510.1	A7X1Q8	AT5G30510.1 | Symbols: RPS1, ARRPS1 | ribosomal protein S1 | chr5:11619262-11621223 REVERSE LENGTH=416	Polyribonucleotide nucleotidyltransferase OS=Staphylococcus aureus (strain Mu3 / ATCC 700698) GN=pnp PE=3 SV=1	23.2748	23.5454	23.7212	23.3995	27.373	27.2546	27.254	27.0649	23.4601	23.3398	23.5535	24.2731	23.5836	23.209	22.5285	24.4079	Cluster -2	4	36.3	44.67	0	18.99	6.98354	2.59345e-07
Pg_S1171.21	cytochrome P450, family 97, subfamily B, polypeptide 3	AT4G15110.1	Q7KWN2	AT4G15110.1 | Symbols: CYP97B3 | cytochrome P450, family 97, subfamily B, polypeptide 3 | chr4:8629922-8632993 REVERSE LENGTH=580	Probable cytochrome P450 525A1 OS=Dictyostelium discoideum GN=cyp525A1 PE=3 SV=1	23.1226	23.8009	23.9309	23.4858	26.9106	27.2811	27.3619	27.0841	22.9857	22.9958	23.3752	22.9076	24.2259	22.5874	24.3647	24.1293	Cluster -2	8	20.7	65.969	0	30.154	6.81191	3.73127e-07
Pg_S1106.21	presequence protease 1	AT3G19170.1	Q6BTC0	AT3G19170.1 | Symbols: ATPREP1, ATZNMP, PREP1 | presequence protease 1 | chr3:6625578-6631874 REVERSE LENGTH=1080	Mitochondrial presequence protease OS=Debaryomyces hansenii (strain ATCC 36239 / CBS 767 / JCM 1990 / NBRC 0083 / IGC 2968) GN=CYM1 PE=3 SV=2	29.4379	29.5434	29.5427	29.4398	31.7821	31.7784	31.769	31.7371	29.1502	29.1479	29.2353	29.1386	29.4407	29.5826	29.4822	29.5834	Cluster -2	6	61.7	119.84	0	323.31	15.7717	8.90157e-15
Pg_S1029.23	translocon at the outer envelope membrane of chloroplasts 34	AT5G05000.2	Q6S5G3	AT5G05000.2 | Symbols: TOC34, ATTOC34, OEP34 | translocon at the outer envelope membrane of chloroplasts 34 | chr5:1474262-1475772 REVERSE LENGTH=313	Translocase of chloroplast 90, chloroplastic OS=Arabidopsis thaliana GN=TOC90 PE=1 SV=1	23.8789	25.5277	24.5224	24.5523	28.1443	28.2174	28.271	28.2143	24.4708	22.7292	24.3567	25.1442	25.0135	25.024	25.0459	25.1942	Cluster -2	6	38	33.74	0	34.588	5.50441	5.98364e-06
Pg_S6053.13	photosystem I subunit H2	AT1G52230.1	P13352	AT1G52230.1 | Symbols: PSAH2, PSAH-2, PSI-H | photosystem I subunit H2 | chr1:19454902-19455508 FORWARD LENGTH=145	Photosystem I reaction center subunit VI, chloroplastic OS=Chlamydomonas reinhardtii GN=PSAH PE=1 SV=1	23.8771	24.2114	22.9533	24.4995	28.8422	28.847	28.709	28.5854	23.3463	22.915	23.473	23.2779	25.8115	22.8259	25.0733	25.0416	Cluster -2	2	49	15.392	0	43.889	6.05818	1.82623e-06
Pg_S0939.5	triosephosphate isomerase	AT2G21170.1	P48491	AT2G21170.1 | Symbols: TIM, PDTPI | triosephosphate isomerase | chr2:9071047-9073106 REVERSE LENGTH=315	Triosephosphate isomerase, cytosolic OS=Arabidopsis thaliana GN=CTIMC PE=1 SV=2	30.3613	30.3893	30.3447	30.3757	31.8548	31.8638	31.7922	31.8738	30.0046	30.0227	30.1519	30.0295	30.33	30.382	30.3412	30.3335	Cluster -2	3	66.9	34.504	0	323.31	15.0364	3.45652e-14
Pg_S6468.14	ribosomal protein large subunit 27	AT5G40950.1	A4F9L2	AT5G40950.1 | Symbols: RPL27 | ribosomal protein large subunit 27 | chr5:16410866-16411845 FORWARD LENGTH=198	50S ribosomal protein L27 OS=Saccharopolyspora erythraea (strain NRRL 23338) GN=rpmA PE=3 SV=1	23.0153	23.9452	23.3212	23.4883	27.4886	27.5255	27.5844	27.6475	22.9724	22.6016	24.652	22.6548	23.3972	23.4175	23.366	23.3635	Cluster -2	3	17.8	20.68	0	32.778	6.96399	2.70117e-07
Pg_S0564.18	NDH-dependent cyclic electron flow 1	AT1G15980.1	unknown	AT1G15980.1 | Symbols: NDF1, NDH48 | NDH-dependent cyclic electron flow 1 | chr1:5489314-5491199 FORWARD LENGTH=461	unknown	23.7682	23.5389	23.2088	23.2633	28.2347	28.2584	28.197	28.1423	22.0009	23.3599	24.3889	22.9272	23.7711	23.6774	22.4344	23.2075	Cluster -2	4	37.9	21.544	0	59.863	7.07013	2.16005e-07
Pg_S0488.29	post-illumination chlorophyll fluorescence increase	AT3G15840.1	unknown	AT3G15840.1 | Symbols: PIFI | post-illumination chlorophyll fluorescence increase | chr3:5356782-5358418 REVERSE LENGTH=268	unknown	23.366	23.8122	23.4065	23.4155	27.0541	26.8915	27.0439	26.8171	22.4418	22.0073	24.0865	23.1313	23.3631	23.5897	22.7336	22.9116	Cluster -2	4	14.6	31.441	0	9.5002	6.58288	6.03481e-07
Pg_S0397.37	light-harvesting chlorophyll-protein complex I subunit A4	AT3G47470.1	P12332	AT3G47470.1 | Symbols: LHCA4, CAB4 | light-harvesting chlorophyll-protein complex I subunit A4 | chr3:17493622-17494773 REVERSE LENGTH=251	Chlorophyll a-b binding protein, chloroplastic (Fragment) OS=Silene pratensis PE=2 SV=2	23.8798	25.0387	23.9413	24.4009	28.0745	28.1545	28.1315	28.0996	23.2992	24.8563	22.7842	23.1882	24.4113	24.1809	24.8131	24.3352	Cluster -2	1	41.9	27.244	0	18.338	6.6255	5.54595e-07
Pg_S0044.5	unknown	unknown	unknown	unknown	unknown	24.5531	23.2859	23.4264	23.889	27.2961	27.2343	27.526	27.2128	22.6278	24.6939	23.1747	22.8669	23.837	23.3429	23.4519	23.2306	Cluster -2	4	13.9	42.446	0	21.758	6.08934	1.71215e-06
Pg_S0109.29	chaperonin 20	AT5G20720.1	Q5LAF5	AT5G20720.1 | Symbols: CPN20, CPN10, CHCPN10, ATCPN21, CPN21 | chaperonin 20 | chr5:7015015-7016354 FORWARD LENGTH=253	10 kDa chaperonin OS=Bacteroides fragilis (strain ATCC 25285 / NCTC 9343) GN=groS PE=3 SV=1	27.9443	28.2489	28.2126	28.2288	30.2356	30.3145	30.2992	30.1477	27.8246	27.7203	27.8123	27.7696	28.0293	28.2846	28.1843	28.2618	Cluster -2	3	58.5	27.314	0	60.348	12.0157	1.05339e-11
Pg_S8876.1	Pyridine nucleotide-disulphide oxidoreductase family protein	AT1G74470.1	O26377	AT1G74470.1 | Symbols: | Pyridine nucleotide-disulphide oxidoreductase family protein | chr1:27991248-27992845 FORWARD LENGTH=467	Digeranylgeranylglycerophospholipid reductase 1 OS=Methanothermobacter thermautotrophicus (strain ATCC 29096 / DSM 1053 / JCM 10044 / NBRC 100330 / Delta H) GN=MTH_277 PE=3 SV=1	23.9881	24.5047	24.3364	23.2242	28.3001	28.3332	28.2426	28.0879	23.0427	22.6122	23.253	23.5701	24.7287	24.7421	24.8876	25.2533	Cluster -2	3	46	51.26	0	14.969	8.94572	4.5336e-09
Pg_S7691.1	Chaperone protein htpG family protein	AT4G24190.1	B0UN89	AT4G24190.1 | Symbols: SHD, HSP90.7, AtHsp90.7, AtHsp90-7 | Chaperone protein htpG family protein | chr4:12551902-12555851 REVERSE LENGTH=823	Chaperone protein HtpG OS=Methylobacterium sp. (strain 4-46) GN=htpG PE=3 SV=1	23.0457	23.772	23.0909	22.9769	27.9513	27.8731	27.8693	27.4907	22.6171	22.5666	22.9562	23.3229	24.3951	24.6918	23.5668	24.8319	Cluster -2	2	45.8	131.07	0	14.792	8.68392	7.70185e-09
Pg_S4808.1	myo-inositol monophosphatase like 1	AT1G31190.1	P54928	AT1G31190.1 | Symbols: IMPL1 | myo-inositol monophosphatase like 1 | chr1:11144861-11146800 FORWARD LENGTH=371	Inositol monophosphatase 3 OS=Solanum lycopersicum GN=IMP3 PE=1 SV=1	24.9135	24.7637	22.899	24.1482	25.9311	25.7228	25.7475	25.9139	23.5609	23.889	23.8961	23.5454	24.4242	24.4074	24.2845	24.3166	Cluster -2	4	21.8	41.213	0	21.291	3.61334	0.000355315
Pg_S4380.10	3-ketoacyl-CoA synthase 12	AT2G28630.1	Q9LZ72	AT2G28630.1 | Symbols: KCS12 | 3-ketoacyl-CoA synthase 12 | chr2:12275719-12277149 REVERSE LENGTH=476	3-ketoacyl-CoA synthase 21 OS=Arabidopsis thaliana GN=KCS21 PE=2 SV=1	24.5882	24.2406	23.2804	23.3716	26.1895	26.1024	25.9682	26.2273	22.8812	23.6138	22.5896	23.1745	24.3324	23.5563	24.037	23.6044	Cluster -2	2	18.6	53.562	0	37.492	5.58616	5.00986e-06
Pg_S7699.3	isoprenoid F	AT1G63970.1	Q8ZMF7	AT1G63970.1 | Symbols: ISPF, MECPS | isoprenoid F | chr1:23738923-23740336 REVERSE LENGTH=231	2-C-methyl-D-erythritol 2,4-cyclodiphosphate synthase OS=Salmonella typhimurium (strain LT2 / SGSC1412 / ATCC 700720) GN=ispF PE=1 SV=1	24.9449	23.5509	23.8698	23.1621	27.6003	27.5802	27.6369	27.7138	22.4464	22.979	23.4064	24.3207	24.6192	24.3659	22.8955	25.2684	Cluster -2	1	29.1	25.57	0	17.056	4.92592	2.06143e-05
Pg_S3581.10	calcium sensing receptor	AT5G23060.1	Q9FN48	AT5G23060.1 | Symbols: CaS | calcium sensing receptor | chr5:7736760-7738412 REVERSE LENGTH=387	Calcium sensing receptor, chloroplastic OS=Arabidopsis thaliana GN=CAS PE=1 SV=1	23.9494	24.3988	23.4717	23.6652	28.8075	28.7558	28.7351	28.9725	21.7515	22.5501	22.8423	24.0307	24.8306	25.2768	25.3681	25.3792	Cluster -2	9	14.3	105.47	0	66.669	7.95639	3.41121e-08
Pg_S3017.6	serine transhydroxymethyltransferase 1	AT4G37930.1	A7FFW1	AT4G37930.1 | Symbols: SHM1, STM, SHMT1 | serine transhydroxymethyltransferase 1 | chr4:17831891-17834742 REVERSE LENGTH=517	Serine hydroxymethyltransferase OS=Yersinia pseudotuberculosis serotype O:1b (strain IP 31758) GN=glyA PE=3 SV=1	23.6566	24.2734	24.4713	22.7427	29.9717	29.8937	29.0354	29.8988	22.6602	23.0982	23.8103	23.3719	24.8865	24.9594	25.1251	25.0323	Cluster -2	4	63.9	56.645	0	98.822	8.73429	6.92075e-09
Pg_S2636.20	phosphoribulokinase	AT1G32060.1	P19824	AT1G32060.1 | Symbols: PRK | phosphoribulokinase | chr1:11532668-11534406 FORWARD LENGTH=395	Phosphoribulokinase, chloroplastic OS=Chlamydomonas reinhardtii GN=PRKA PE=1 SV=1	24.3649	24.4423	24.0953	23.1953	29.3975	29.0846	27.8105	27.8697	22.9752	22.3069	22.8932	23.6945	26.0712	25.5874	25.5696	22.9448	Cluster -2	2	34.3	67.185	0	12.315	4.98067	1.83711e-05
Pg_S2454.12	photosystem I subunit F	AT1G31330.1	Q7NH05	AT1G31330.1 | Symbols: PSAF | photosystem I subunit F | chr1:11215011-11215939 REVERSE LENGTH=221	Photosystem I reaction center subunit III OS=Gloeobacter violaceus (strain PCC 7421) GN=psaF PE=1 SV=1	24.1513	24.2556	22.9842	24.5778	28.2423	28.4131	28.5627	28.7739	23.3422	23.082	23.3151	24.2765	24.8298	24.9094	24.7986	24.7184	Cluster -2	1	11	18.021	0	5.1367	8.0256	2.94639e-08
Pg_S2148.27	FtsH extracellular protease family	AT5G42270.1	Q9SSB4	AT5G42270.1 | Symbols: VAR1, FTSH5 | FtsH extracellular protease family | chr5:16902659-16905102 FORWARD LENGTH=704	26S protease regulatory subunit 7 homolog B OS=Arabidopsis thaliana GN=RPT1B PE=1 SV=2	25.0411	22.9802	23.0414	24.0675	28.2428	27.9834	28.0581	27.6557	22.8794	23.492	24.3661	22.9334	25.5662	25.7313	25.2201	23.1281	Cluster -2	3	67.9	64.527	0	35.012	4.57039	4.44198e-05
Pg_S2069.20	alpha/beta-Hydrolases superfamily protein	AT4G16820.1	Q9P979	AT4G16820.1 | Symbols: PLA-I{beta]2 | alpha/beta-Hydrolases superfamily protein | chr4:9467563-9469116 FORWARD LENGTH=517	Feruloyl esterase A OS=Aspergillus awamori GN=faeA PE=1 SV=3	24.8411	24.0351	23.2671	24.0063	24.7183	26.3059	25.0241	26.0711	23.1716	23.2511	23.1964	24.3685	23.7681	24.1371	24.0637	23.7542	Cluster -2	2	49.7	35.852	0	8.7224	2.66982	0.00278191
Pg_S1650.4	Rhodanese/Cell cycle control phosphatase superfamily protein	AT1G17850.2	Q1QPC1	AT1G17850.2 | Symbols: | Rhodanese/Cell cycle control phosphatase superfamily protein | chr1:6146470-6148820 REVERSE LENGTH=448	UPF0176 protein Nham_1078 OS=Nitrobacter hamburgensis (strain X14 / DSM 10229) GN=Nham_1078 PE=3 SV=1	24.0227	24.2432	23.9873	23.8899	30.0041	30.0373	29.9278	30.2243	23.4884	22.9846	22.93	24.0019	25.6263	25.834	25.6173	25.4882	Cluster -2	4	47	68.042	0	170.25	11.9638	1.16081e-11
Pg_S1647.32	Cytochrome P450 superfamily protein	AT5G07990.1	O42430	AT5G07990.1 | Symbols: TT7, CYP75B1, D501 | Cytochrome P450 superfamily protein | chr5:2560437-2562859 FORWARD LENGTH=513	Cytochrome P450 1A1 OS=Limanda limanda GN=cyp1a1 PE=2 SV=1	25.1557	24.9001	24.3466	23.1643	27.696	27.9872	27.7714	27.4616	22.8876	22.5362	23.4974	23.0302	24.7622	24.3536	24.4505	24.3729	Cluster -2	9	28.4	61.744	0	42.089	6.8847	3.19826e-07
Pg_S1617.20	Transketolase	AT2G45290.1	A4IQR7	AT2G45290.1 | Symbols: | Transketolase | chr2:18672737-18675589 FORWARD LENGTH=741	1-deoxy-D-xylulose-5-phosphate synthase OS=Geobacillus thermodenitrificans (strain NG80-2) GN=dxs PE=3 SV=1	31.3719	31.4017	31.3313	31.4011	34.0041	34.0564	34.0223	34.0629	30.7659	30.7542	30.8118	30.7199	31.7545	31.8034	31.7036	31.7503	Cluster -2	6	69.4	76.53	0	323.31	18.8188	4.39284e-17
Pg_S0905.44	NAD(P)-binding Rossmann-fold superfamily protein	AT1G30620.1	Q31FG4	AT1G30620.1 | Symbols: HSR8, MUR4, UXE1 | NAD(P)-binding Rossmann-fold superfamily protein | chr1:10855496-10857970 FORWARD LENGTH=419	ADP-L-glycero-D-manno-heptose-6-epimerase OS=Thiomicrospira crunogena (strain XCL-2) GN=hldD PE=3 SV=1	24.3267	24.0829	23.9231	24.2753	29.3189	29.404	29.5429	29.481	24.6378	23.3563	22.2694	23.5798	25.1934	25.1976	25.0215	25.2635	Cluster -2	15	54.5	43.842	0	82.31	8.38675	1.40238e-08
Pg_S0741.47	glutamate synthase 1	AT5G04140.2	O87392	AT5G04140.2 | Symbols: GLU1, GLS1, GLUS, FD-GOGAT | glutamate synthase 1 | chr5:1130031-1138186 FORWARD LENGTH=1648	Glutamate synthase large subunit-like protein OS=Rhizobium meliloti (strain 1021) GN=glxD PE=3 SV=2	29.4008	28.8731	29.2289	29.3613	32.3578	32.3733	32.3918	32.2047	28.1457	28.0445	28.2935	27.7804	29.4075	29.3672	29.3784	29.3451	Cluster -2	7	48.7	171.76	0	323.31	11.9816	1.11824e-11
Pg_S5750.2	Ribosomal L5P family protein	AT4G01310.1	A9VP89	AT4G01310.1 | Symbols: | Ribosomal L5P family protein | chr4:544166-545480 REVERSE LENGTH=262	50S ribosomal protein L5 OS=Bacillus weihenstephanensis (strain KBAB4) GN=rplE PE=3 SV=1	25.1578	23.5939	23.5578	23.3926	29.9161	29.8104	29.8227	29.8609	22.8138	23.286	22.9562	23.6075	25.8156	26.2151	25.8308	25.4106	Cluster -2	11	51.9	29.137	0	82.738	9.14593	3.03685e-09
Pg_S0595.26	glycine-tRNA ligases	AT3G48110.1	Q4QLY1	AT3G48110.1 | Symbols: EDD1, EDD | glycine-tRNA ligases | chr3:17763111-17770964 FORWARD LENGTH=1067	Glycine--tRNA ligase alpha subunit OS=Haemophilus influenzae (strain 86-028NP) GN=glyQ PE=3 SV=1	23.9751	25.0942	23.4077	23.8582	28.3414	28.3112	27.9573	28.1198	24.7556	23.5314	23.2761	23.3444	24.5732	24.7285	24.7645	24.7048	Cluster -2	17	22.2	128.14	0	55.75	6.95567	2.74163e-07
Pg_S0363.19	serine transhydroxymethyltransferase 1	AT4G37930.1	A7FFW1	AT4G37930.1 | Symbols: SHM1, STM, SHMT1 | serine transhydroxymethyltransferase 1 | chr4:17831891-17834742 REVERSE LENGTH=517	Serine hydroxymethyltransferase OS=Yersinia pseudotuberculosis serotype O:1b (strain IP 31758) GN=glyA PE=3 SV=1	28.4599	28.5198	28.337	28.4165	32.5084	32.5681	32.5094	32.3781	27.5753	27.7155	27.4782	27.4904	29.3206	29.4935	29.4085	29.3753	Cluster -2	1	63.3	57.337	0	323.31	16.3078	3.47488e-15
Pg_S0252.43	Thioredoxin superfamily protein	AT2G37240.1	Q6PBP3	AT2G37240.1 | Symbols: | Thioredoxin superfamily protein | chr2:15640235-15641720 REVERSE LENGTH=248	Redox-regulatory protein FAM213A OS=Danio rerio GN=fam213a PE=2 SV=2	24.2327	24.0673	23.1296	23.463	29.9598	29.9577	29.957	29.9835	22.6896	22.4104	22.4488	22.3057	25.6864	25.1547	25.0293	25.5994	Cluster -2	5	43.7	23.45	0	116.79	11.7643	1.71123e-11
Pg_S0204.7	unknown	unknown	unknown	unknown	unknown	24.7631	24.1482	24.0411	23.958	27.3713	28.3919	28.0218	27.7763	23.6331	23.1034	23.3197	24.1134	23.5928	25.3506	23.9744	25.6079	Cluster -2	4	27.5	26.857	0	23.482	5.78103	3.32049e-06
Pg_S0096.2	unknown	unknown	unknown	unknown	unknown	24.7398	23.6849	23.7014	23.0664	28.6748	28.7762	28.7056	28.6524	23.11	22.8303	23.618	23.8178	24.9932	25.1897	25.4994	25.3139	Cluster -2	5	43.7	33.944	0	70.211	8.6494	8.27523e-09
Pg_S1815.15	Pyruvate kinase family protein	AT5G56350.1	P19680	AT5G56350.1 | Symbols: | Pyruvate kinase family protein | chr5:22820254-22822529 REVERSE LENGTH=498	Pyruvate kinase (Fragment) OS=Spiroplasma citri GN=pyk PE=3 SV=1	23.7482	23.4464	22.9073	22.7921	24.824	24.8819	25.0761	24.8288	23.0365	22.8805	22.05	23.5886	22.8292	23.6396	23.1582	23.8987	Cluster -2	4	13.3	63.383	0	12.462	3.63151	0.00034145
Pg_S0015.13	triosephosphate isomerase	AT2G21170.1	P48491	AT2G21170.1 | Symbols: TIM, PDTPI | triosephosphate isomerase | chr2:9071047-9073106 REVERSE LENGTH=315	Triosephosphate isomerase, cytosolic OS=Arabidopsis thaliana GN=CTIMC PE=1 SV=2	26.9775	26.8257	26.889	26.9054	28.0268	28.0639	28.1426	28.0761	26.7027	26.707	26.696	26.6342	26.9387	27.0129	27.0965	27.1386	Cluster -2	3	75.6	30.359	0	60.902	11.5581	2.51583e-11
Pg_S0055.3	CLPC homologue 1	AT5G50920.1	P84565	AT5G50920.1 | Symbols: CLPC, ATHSP93-V, HSP93-V, DCA1, CLPC1 | CLPC homologue 1 | chr5:20715710-20719800 REVERSE LENGTH=929	ATP-dependent Clp protease ATP-binding subunit clpA homolog (Fragments) OS=Populus euphratica PE=1 SV=1	24.98	25.0372	23.3772	23.8479	26.7296	27.0889	26.9705	27.0895	23.9194	24.4037	24.1169	24.0471	24.7148	25.0238	24.967	24.9933	Cluster -2	5	54	102.49	0	43.617	5.48645	6.22795e-06
Pg_S7163.5	protochlorophyllide oxidoreductase A	AT5G54190.1	Q96NR8	AT5G54190.1 | Symbols: PORA | protochlorophyllide oxidoreductase A | chr5:21991183-21992773 REVERSE LENGTH=405	Retinol dehydrogenase 12 OS=Homo sapiens GN=RDH12 PE=1 SV=3	23.2159	23.6569	23.7209	24.4719	31.3398	31.463	31.3734	31.319	23.2807	22.2008	22.8672	22.1034	25.7196	25.9956	25.8783	25.9149	Cluster -2	2	62	42.777	0	245.3	11.5684	2.46626e-11
Pg_S6556.3	Ribosomal protein S5 family protein	AT1G64880.1	Q6AP53	AT1G64880.1 | Symbols: | Ribosomal protein S5 family protein | chr1:24105713-24108780 FORWARD LENGTH=515	30S ribosomal protein S5 OS=Desulfotalea psychrophila (strain LSv54 / DSM 12343) GN=rpsE PE=3 SV=1	23.1224	23.229	24.0963	25.1809	29.6245	29.5696	29.5058	29.3119	23.6223	22.7956	23.3056	23.1114	25.0852	25.3464	25.0098	26.6602	Cluster -2	5	19.4	33.967	0	24.201	7.38922	1.10484e-07
Pg_S6554.4	unknown	unknown	unknown	unknown	unknown	24.3244	24.2737	25.0503	25.8482	31.0274	31.6938	31.0545	32.5262	22.5141	23.5656	25.0274	23.22	26.3473	26.3849	26.4323	26.3307	Cluster -2	20	62.1	44.48	0	277.64	7.79002	4.81859e-08
Pg_S4604.7	NAD(P)-binding Rossmann-fold superfamily protein	AT1G30620.1	Q31FG4	AT1G30620.1 | Symbols: HSR8, MUR4, UXE1 | NAD(P)-binding Rossmann-fold superfamily protein | chr1:10855496-10857970 FORWARD LENGTH=419	ADP-L-glycero-D-manno-heptose-6-epimerase OS=Thiomicrospira crunogena (strain XCL-2) GN=hldD PE=3 SV=1	23.225	24.9827	23.7829	24.7704	29.4721	29.5558	29.4806	29.7012	22.9525	22.9975	23.5635	23.2018	25.4292	25.6061	25.474	25.3154	Cluster -2	5	37.3	43.258	0	76.672	9.18955	2.79171e-09
Pg_S3629.2	STT7 homolog STN7	AT1G68830.1	Q9LZV4	AT1G68830.1 | Symbols: STN7 | STT7 homolog STN7 | chr1:25872654-25875473 REVERSE LENGTH=562	Serine/threonine-protein kinase STN8, chloroplastic OS=Arabidopsis thaliana GN=STN8 PE=2 SV=1	23.6208	23.5633	24.9564	24.152	28.6308	28.9864	28.5454	28.4359	23.6886	23.5891	22.4373	23.3413	25.5877	25.6561	23.8505	24.1553	Cluster -2	12	31.7	56.37	0	57.383	6.50976	7.04588e-07
Pg_S3138.2	FAD/NAD(P)-binding oxidoreductase family protein	AT1G58440.1	P52019	AT1G58440.1 | Symbols: XF1, SQE1 | FAD/NAD(P)-binding oxidoreductase family protein | chr1:21714094-21717246 REVERSE LENGTH=531	Squalene monooxygenase OS=Mus musculus GN=Sqle PE=2 SV=1	25.0508	23.6578	24.2399	24.239	27.841	27.7412	27.719	26.9903	23.2236	22.8435	23.9227	22.7456	24.2574	25.5181	23.2134	25.0554	Cluster -2	9	22.9	51.732	0	27.74	5.25571	1.01463e-05
Pg_S4587.4	calcium-dependent protein kinase 4	AT4G09570.1	Q2RBF0	AT4G09570.1 | Symbols: CPK4, ATCPK4 | calcium-dependent protein kinase 4 | chr4:6049560-6052184 FORWARD LENGTH=501	CBL-interacting protein kinase 15 OS=Oryza sativa subsp. japonica GN=CIPK15 PE=2 SV=1	23.1409	24.355	24.4902	24.0764	29.0134	28.9727	29.0009	29.0087	23.0784	23.8752	23.7516	22.9466	25.2551	25.3493	23.7876	25.6501	Cluster -2	4	9.3	75.31	0	18.87	7.43975	9.92789e-08
Pg_S1907.14	ribosomal protein S9	AT1G74970.1	P66646	AT1G74970.1 | Symbols: RPS9, TWN3 | ribosomal protein S9 | chr1:28157761-28159202 REVERSE LENGTH=208	30S ribosomal protein S9 OS=Staphylococcus aureus (strain N315) GN=rpsI PE=1 SV=1	23.3006	24.446	24.212	25.4692	27.7823	27.5324	26.2578	26.661	23.4244	23.3948	22.9547	23.3537	24.3655	25.4765	24.1856	24.5129	Cluster -2	2	22.2	24.71	0	19.661	4.63623	3.85674e-05
Pg_S1725.1	ribosomal protein S11	ATCG00750.1	Q749B1	ATCG00750.1 | Symbols: RPS11 | ribosomal protein S11 | chrC:78960-79376 REVERSE LENGTH=138	30S ribosomal protein S11 OS=Geobacter sulfurreducens (strain ATCC 51573 / DSM 12127 / PCA) GN=rpsK PE=3 SV=1	22.7488	23.7064	23.2976	24.2884	28.9801	29.0823	29.0886	28.9454	22.1541	23.2157	22.0701	23.3339	24.7594	24.8512	24.7403	24.8706	Cluster -2	4	27.5	14.89	0	38.262	8.92933	4.67137e-09
Pg_S0938.17	Photosystem II reaction center PsbP family protein	AT2G28605.1	Q8VY52	AT2G28605.1 | Symbols: | Photosystem II reaction center PsbP family protein | chr2:12254911-12255689 FORWARD LENGTH=232	PsbP domain-containing protein 2, chloroplastic OS=Arabidopsis thaliana GN=PPD2 PE=1 SV=1	24.1563	23.0206	23.6432	23.9368	28.8383	28.7836	28.5519	28.7115	23.0963	23.4724	23.2784	23.0703	26.4302	26.4759	22.775	26.0138	Cluster -2	7	43.9	28.107	0	74.455	5.0328	1.63726e-05
Pg_S0895.37	glyoxylate reductase 2	AT1G17650.1	P9WNY2	AT1G17650.1 | Symbols: GLYR2, GR2 | glyoxylate reductase 2 | chr1:6069594-6071964 REVERSE LENGTH=358	Uncharacterized oxidoreductase MT0794 OS=Mycobacterium tuberculosis (strain CDC 1551 / Oshkosh) GN=MT0794 PE=3 SV=1	23.6851	24.2016	24.1334	24.2569	27.814	27.7453	27.6309	27.6172	23.5463	23.4904	23.7414	22.9433	24.4997	24.8896	25.1129	24.9826	Cluster -2	2	24.5	65.93	0	34.913	9.96946	5.90395e-10
Pg_S0642.7	D-ribulose-5-phosphate-3-epimerase	AT5G61410.1	P47358	AT5G61410.1 | Symbols: RPE, EMB2728 | D-ribulose-5-phosphate-3-epimerase | chr5:24684085-24685836 REVERSE LENGTH=281	Probable ribulose-phosphate 3-epimerase OS=Mycoplasma genitalium (strain ATCC 33530 / G-37 / NCTC 10195) GN=rpe PE=3 SV=1	23.9865	24.1156	24.2518	24.1054	28.6926	28.6765	28.7195	28.9195	24.2282	23.4416	23.6055	22.6091	26.475	26.5946	23.7195	26.3473	Cluster -2	1	31	30.254	0	13.52	5.64646	4.41344e-06
Pg_S5272.2	unknown	unknown	unknown	unknown	unknown	23.2832	24.0974	24.0485	24.4499	29.251	29.3487	29.2049	29.3932	23.3846	23.5378	23.2216	22.1248	25.4759	25.3827	25.2667	25.449	Cluster -2	5	49.4	19.03	0	140.48	9.52555	1.42278e-09
Pg_S0563.8	rubisco activase	AT2G39730.1	O28972	AT2G39730.1 | Symbols: RCA | rubisco activase | chr2:16570951-16573345 REVERSE LENGTH=474	Cell division cycle protein 48 homolog AF_1297 OS=Archaeoglobus fulgidus (strain ATCC 49558 / VC-16 / DSM 4304 / JCM 9628 / NBRC 100126) GN=AF_1297 PE=3 SV=1	23.7073	24.1185	24.31	23.9403	27.2264	27.3201	27.2071	28.4238	22.5671	23.466	22.4481	22.2251	23.529	25.7234	22.5691	25.8988	Cluster -2	3	55.2	54.973	0	27.553	4.22273	9.46405e-05
Pg_S5440.10	photosystem II reaction center PSB28 protein	AT4G28660.2	Q7NM41	AT4G28660.2 | Symbols: PSB28 | photosystem II reaction center PSB28 protein | chr4:14150008-14150933 FORWARD LENGTH=198	Photosystem II reaction center Psb28 protein OS=Gloeobacter violaceus (strain PCC 7421) GN=psb28 PE=3 SV=1	23.7524	24.4389	23.5823	24.4505	26.6939	26.6464	22.7953	26.4924	22.7804	22.3655	23.1041	23.0581	21.8646	23.1777	23.1504	22.7771	Cluster -2	2	11.7	20.107	0	11.933	2.21496	0.00758456
Pg_S5273.5	Class II aminoacyl-tRNA and biotin synthetases superfamily protein	AT5G56680.1	Q97PR0	AT5G56680.1 | Symbols: SYNC1, EMB2755, SYNC1 ARATH | Class II aminoacyl-tRNA and biotin synthetases superfamily protein | chr5:22936645-22938841 FORWARD LENGTH=572	Asparagine--tRNA ligase OS=Streptococcus pneumoniae serotype 4 (strain ATCC BAA-334 / TIGR4) GN=asnS PE=1 SV=1	24.0091	24.1137	23.3772	24.5083	26.4624	26.6625	26.1774	26.3185	23.8486	23.1508	23.0905	23.7175	22.2697	23.814	23.8142	22.4667	Cluster -2	6	14	64.872	0	29.5	5.27683	9.68304e-06
Pg_S2791.12	Alanyl-tRNA synthetase, class IIc	AT5G22800.1	B0TFY7	AT5G22800.1 | Symbols: EMB86, EMB1030, EMB263 | Alanyl-tRNA synthetase, class IIc | chr5:7616221-7619961 REVERSE LENGTH=978	Alanine--tRNA ligase OS=Heliobacterium modesticaldum (strain ATCC 51547 / Ice1) GN=alaS PE=3 SV=1	24.128	25.2302	23.381	24.0721	26.3106	26.4108	26.163	26.6126	23.2192	23.5701	22.8269	23.138	22.5704	23.874	23.2885	22.1829	Cluster -2	7	9.4	109.67	0	15.682	5.14657	1.28184e-05
Pg_S7900.3	SECY homolog 1	AT2G18710.1	Q9XQU4	AT2G18710.1 | Symbols: SCY1 | SECY homolog 1 | chr2:8112231-8114452 REVERSE LENGTH=551	Preprotein translocase subunit SECY, chloroplastic OS=Pisum sativum GN=SECY PE=2 SV=1	22.7865	23.6743	24.7067	24.9102	26.249	26.2244	23.4012	26.1791	22.1874	22.8585	23.6036	23.699	22.1581	22.9445	23.4041	22.7802	Cluster -2	4	13.8	59.059	0	18.401	2.10022	0.00967833
Pg_S1945.16	Tetratricopeptide repeat (TPR)-like superfamily protein	AT5G41950.1	unknown	AT5G41950.1 | Symbols: | Tetratricopeptide repeat (TPR)-like superfamily protein | chr5:16785825-16789360 FORWARD LENGTH=565	unknown	25.1556	24.5003	23.0666	24.111	25.542	25.8116	25.4061	25.5738	22.0257	22.6589	23.3859	23.7436	22.4618	23.4073	22.6139	22.0339	Cluster -2	6	5.7	187.24	0	14.407	3.88426	0.000197688
Pg_S6869.2	N-acetyl-l-glutamate kinase	AT3G57560.1	A4X652	AT3G57560.1 | Symbols: NAGK | N-acetyl-l-glutamate kinase | chr3:21311164-21312207 REVERSE LENGTH=347	Acetylglutamate kinase OS=Salinispora tropica (strain ATCC BAA-916 / DSM 44818 / CNB-440) GN=argB PE=3 SV=2	24.7819	24.4582	24.1185	24.0436	25.3928	25.8043	25.8978	25.3788	23.6721	21.5475	23.0091	22.6812	22.8919	23.8467	22.5005	22.6303	Cluster -2	3	12.7	36.708	0	13.729	4.37757	6.74751e-05
Pg_S6848.2	high chlorophyll fluorescence phenotype 173	AT1G16720.1	unknown	AT1G16720.1 | Symbols: HCF173 | high chlorophyll fluorescence phenotype 173 | chr1:5723161-5726248 FORWARD LENGTH=598	unknown	24.4842	24.2857	23.5241	25.341	25.6171	25.7133	25.7893	25.7366	22.8805	21.7697	23.2977	22.9651	23.4122	21.8179	24.0971	23.4448	Cluster -2	4	10.5	67.098	0	13.514	3.60177	0.000364356
Pg_S4696.8	elicitor-activated gene 3-1	AT4G37980.1	P39714	AT4G37980.1 | Symbols: ELI3-1, ELI3, ATCAD7, CAD7 | elicitor-activated gene 3-1 | chr4:17852670-17854302 FORWARD LENGTH=357	(R,R)-butanediol dehydrogenase OS=Saccharomyces cerevisiae (strain ATCC 204508 / S288c) GN=BDH1 PE=1 SV=2	29.697	29.6178	29.589	29.6403	30.196	30.1279	30.1176	30.1358	29.2758	29.248	29.3752	29.2116	29.3013	29.4079	29.4713	29.2699	Cluster -2	12	60.8	39.012	0	151.13	8.94073	4.56915e-09
Pg_S4101.7	40s ribosomal protein SA B	AT3G04770.1	A8A8X0	AT3G04770.1 | Symbols: RPSAb | 40s ribosomal protein SA B | chr3:1309465-1310846 REVERSE LENGTH=332	30S ribosomal protein S2 OS=Ignicoccus hospitalis (strain KIN4/I / DSM 18386 / JCM 14125) GN=rps2 PE=3 SV=1	24.9961	25.0259	24.4492	24.9613	25.5881	25.8977	25.7124	25.7698	24.6285	24.0039	24.4745	24.0117	24.5082	24.2588	24.4396	24.296	Cluster -2	3	38.5	33.031	0	18.302	5.44633	6.78936e-06
Pg_S2159.10	NAD(P)H dehydrogenase subunit H	ATCG01110.1	Q5HB88	ATCG01110.1 | Symbols: NDHH | NAD(P)H dehydrogenase subunit H | chrC:122011-123192 REVERSE LENGTH=393	NADH-quinone oxidoreductase subunit D OS=Ehrlichia ruminantium (strain Welgevonden) GN=nuoD PE=3 SV=1	24.3785	25.0193	23.6572	24.1159	26.2468	26.0959	26.4297	26.5313	23.6812	22.9169	23.2091	22.8586	23.0856	22.6304	24.5661	22.3461	Cluster -2	3	32.3	21.365	0	18.021	4.64208	3.81384e-05
Pg_S1355.1	unknown	unknown	unknown	unknown	unknown	25.0117	25.0253	24.3147	25.6239	26.681	26.6127	26.553	26.7303	23.605	22.4513	23.84	23.1446	23.81	23.7665	24.1862	24.0683	Cluster -2	7	10.4	108.3	0	24.658	6.276	1.14905e-06
Pg_S1163.7	D-cysteine desulfhydrase	AT1G48420.1	Q5KMX3	AT1G48420.1 | Symbols: D-CDES, ATACD1, ACD1 | D-cysteine desulfhydrase | chr1:17896767-17898803 REVERSE LENGTH=401	Probable 1-aminocyclopropane-1-carboxylate deaminase OS=Cryptococcus neoformans var. neoformans serotype D (strain JEC21 / ATCC MYA-565) GN=CNB00190 PE=3 SV=1	24.4343	25.0069	23.7803	24.6341	25.6187	25.5751	25.2897	25.2983	22.4794	22.4692	23.7719	23.2669	23.48	23.5006	22.4227	23.5704	Cluster -2	4	10.5	41.95	0	7.1335	4.3019	7.95209e-05
Pg_S2468.28	ATP binding cassette protein 1	AT4G04770.1	P77689	AT4G04770.1 | Symbols: ATABC1, LAF6, ATNAP1, ABC1 | ATP binding cassette protein 1 | chr4:2427998-2429785 REVERSE LENGTH=557	FeS cluster assembly protein SufD OS=Escherichia coli (strain K12) GN=sufD PE=1 SV=1	23.5686	25.2674	24.2879	24.0789	26.3184	26.3633	26.2182	26.2509	23.3068	22.8712	22.7544	22.0282	22.5646	22.6914	23.7399	21.8447	Cluster -2	6	15.8	61.741	0	19.081	5.32234	8.79205e-06
Pg_S2779.3	Oxidoreductase, zinc-binding dehydrogenase family protein	AT1G23740.1	B1IZH4	AT1G23740.1 | Symbols: | Oxidoreductase, zinc-binding dehydrogenase family protein | chr1:8398245-8399656 REVERSE LENGTH=386	L-threonine 3-dehydrogenase OS=Escherichia coli (strain ATCC 8739 / DSM 1576 / Crooks) GN=tdh PE=3 SV=1	23.7783	24.4559	24.3957	24.1246	25.2127	25.26	25.087	25.153	23.4065	22.0207	23.2944	23.4529	22.73	22.7864	23.4968	22.9983	Cluster -2	3	22.7	32.134	0	9.2797	4.72261	3.18868e-05
Pg_S8810.2	lycopene cyclase	AT3G10230.1	Q9RW68	AT3G10230.1 | Symbols: LYC | lycopene cyclase | chr3:3164340-3165845 REVERSE LENGTH=501	Uncharacterized carotenoid cyclase DR_0801 OS=Deinococcus radiodurans (strain ATCC 13939 / DSM 20539 / JCM 16871 / LMG 4051 / NBRC 15346 / NCIMB 9279 / R1 / VKM B-1422) GN=DR_0801 PE=3 SV=1	24.681	23.7181	23.418	25.0391	26.1268	25.9354	26.2269	25.8814	23.1383	23.0361	24.2622	23.5602	22.818	23.3425	24.608	22.7722	Cluster -2	4	11.9	56.624	0	15.352	3.57093	0.000389407
Pg_S5365.8	NADPH-dependent thioredoxin reductase A	AT2G17420.1	Q67QU3	AT2G17420.1 | Symbols: NTRA, ATNTRA, NTR2 | NADPH-dependent thioredoxin reductase A | chr2:7564357-7566219 FORWARD LENGTH=378	Ferredoxin--NADP reductase OS=Symbiobacterium thermophilum (strain T / IAM 14863) GN=STH965 PE=3 SV=1	24.0283	24.4537	23.5542	24.0888	26.6741	26.8608	26.7166	24.1359	23.0782	23.0778	25.0045	23.366	23.5861	23.9969	24.5061	22.4029	Cluster -2	2	41.8	40.23	0	32.476	2.10396	0.00959924
Pg_S2543.15	Tetratricopeptide repeat (TPR)-like superfamily protein	AT5G41950.1	unknown	AT5G41950.1 | Symbols: | Tetratricopeptide repeat (TPR)-like superfamily protein | chr5:16785825-16789360 FORWARD LENGTH=565	unknown	23.9592	23.5226	23.5596	24.5693	27.431	27.4563	27.6495	27.2669	22.1955	22.5363	24.0882	23.3557	23.4284	22.7083	23.0965	22.8804	Cluster -2	9	9.1	210.45	0	25.699	6.98584	2.58196e-07
Pg_S2507.15	GLU-ADT subunit B	AT1G48520.1	C0M7E9	AT1G48520.1 | Symbols: GATB | GLU-ADT subunit B | chr1:17940185-17942540 FORWARD LENGTH=550	Aspartyl/glutamyl-tRNA(Asn/Gln) amidotransferase subunit B OS=Streptococcus equi subsp. equi (strain 4047) GN=gatB PE=3 SV=1	24.5348	24.1192	24.3664	28.0366	27.3312	26.9512	27.2926	26.8654	23.3833	23.5949	25.2049	23.4558	24.0065	22.4265	26.2951	23.6604	Cluster -2	7	21.4	56.504	0	30.242	1.76258	0.0201588
Pg_S1734.1	NAD(P)-linked oxidoreductase superfamily protein	AT1G59960.1	P78736	AT1G59960.1 | Symbols: | NAD(P)-linked oxidoreductase superfamily protein | chr1:22071410-22073067 REVERSE LENGTH=326	NAD(P)H-dependent D-xylose reductase OS=Pachysolen tannophilus GN=XYL1 PE=1 SV=1	23.4592	24.0264	23.6188	25.582	26.2875	26.3969	26.423	26.455	24.1679	21.8338	23.6349	24.3345	24.0239	23.9734	24.0393	24.1455	Cluster -2	2	27.1	18.862	0	46.164	3.12415	0.00102616
Pg_S1195.2	Plastid-lipid associated protein PAP / fibrillin family protein	AT2G46910.1	Q8W4F1	AT2G46910.1 | Symbols: | Plastid-lipid associated protein PAP / fibrillin family protein | chr2:19272427-19273856 FORWARD LENGTH=284	Probable plastid-lipid-associated protein 10, chloroplastic OS=Arabidopsis thaliana GN=PAP10 PE=2 SV=1	26.3727	26.5425	24.4496	26.8383	28.949	28.878	28.8144	28.6971	25.6976	25.5788	25.7475	25.7171	25.8061	25.5018	25.6101	25.3959	Cluster -2	8	34.6	37.972	0	38.544	5.22148	1.09163e-05
Pg_S1073.6	Translation elongation factor EFG/EF2 protein	AT1G45332.1	B7HQU1	AT1G45332.1 | Symbols: | Translation elongation factor EFG/EF2 protein | chr1:17172507-17176683 REVERSE LENGTH=754	Elongation factor G OS=Bacillus cereus (strain AH187) GN=fusA PE=3 SV=1	25.256	23.214	23.5391	24.302	27.3881	27.585	27.5159	27.5995	21.9336	22.0724	24.1035	23.1819	23.4279	22.58	24.2419	23.752	Cluster -2	2	56.9	86.387	0	7.5506	5.10235	1.40925e-05
Pg_S0219.28	D-ribulose-5-phosphate-3-epimerase	AT5G61410.1	P47358	AT5G61410.1 | Symbols: RPE, EMB2728 | D-ribulose-5-phosphate-3-epimerase | chr5:24684085-24685836 REVERSE LENGTH=281	Probable ribulose-phosphate 3-epimerase OS=Mycoplasma genitalium (strain ATCC 33530 / G-37 / NCTC 10195) GN=rpe PE=3 SV=1	24.2397	25.3347	23.3225	25.7318	29.0351	29.0897	28.9477	28.629	22.4295	22.4025	24.0249	23.8138	23.4485	23.7591	25.1166	24.9737	Cluster -2	1	32.4	30.06	0	73.043	5.65118	4.37458e-06
Pg_S0273.9	Membrane trafficking VPS53 family protein	AT1G50500.2	P87129	AT1G50500.2 | Symbols: HIT1 | Membrane trafficking VPS53 family protein | chr1:18708217-18715597 REVERSE LENGTH=847	Vacuolar protein sorting-associated protein 53 OS=Schizosaccharomyces pombe (strain 972 / ATCC 24843) GN=vps53 PE=1 SV=1	23.4214	23.0364	23.2279	24.5492	25.5115	25.4958	25.5857	25.4364	23.2426	22.7609	23.8851	23.5295	22.4826	23.4378	24.3707	22.6906	Cluster -2	1	4.1	118.12	0	6.3739	3.32995	0.00065685
Pg_S5290.1	ribosomal protein L9	AT3G44890.1	C1B716	AT3G44890.1 | Symbols: RPL9 | ribosomal protein L9 | chr3:16386505-16387963 FORWARD LENGTH=197	50S ribosomal protein L9 OS=Rhodococcus opacus (strain B4) GN=rplI PE=3 SV=1	24.8157	24.5517	23.3463	24.1802	27.1227	27.1384	27.0107	27.1488	24.9576	24.3692	22.6658	23.9286	23.1434	22.769	22.8966	22.9755	Cluster -2	2	32.7	22.166	0	22.097	5.59879	4.88263e-06
Pg_S4667.5	Translation initiation factor 2, small GTP-binding protein	AT1G17220.1	Q0I7K2	AT1G17220.1 | Symbols: FUG1 | Translation initiation factor 2, small GTP-binding protein | chr1:5885383-5890165 FORWARD LENGTH=1026	Translation initiation factor IF-2 OS=Synechococcus sp. (strain CC9311) GN=infB PE=3 SV=1	23.1977	24.3002	23.5608	24.2235	25.7488	25.8845	25.8334	25.8521	22.8985	23.5681	23.1248	23.6299	24.0917	22.1506	23.159	22.6833	Cluster -2	2	6.2	109.19	0	12.144	4.59516	4.21499e-05
Pg_S3643.7	chaperonin 20	AT5G20720.1	Q5LAF5	AT5G20720.1 | Symbols: CPN20, CPN10, CHCPN10, ATCPN21, CPN21 | chaperonin 20 | chr5:7015015-7016354 FORWARD LENGTH=253	10 kDa chaperonin OS=Bacteroides fragilis (strain ATCC 25285 / NCTC 9343) GN=groS PE=3 SV=1	31.3483	31.4779	31.5233	31.2429	32.3119	32.2914	32.1951	32.2119	30.9157	31.0101	30.7913	30.8764	30.452	30.5312	30.5499	30.4351	Cluster -2	2	54.1	27.072	0	217.01	10.7907	1.16864e-10
Pg_S3332.15	GDSL-like Lipase/Acylhydrolase superfamily protein	AT1G29660.1	P10978	AT1G29660.1 | Symbols: | GDSL-like Lipase/Acylhydrolase superfamily protein | chr1:10371955-10373624 FORWARD LENGTH=364	Retrovirus-related Pol polyprotein from transposon TNT 1-94 OS=Nicotiana tabacum PE=2 SV=1	23.3113	23.7183	23.5155	24.6305	27.2991	26.772	26.6906	26.8298	23.8923	23.7383	22.6254	22.8858	22.7695	22.5643	22.5435	22.8325	Cluster -2	3	5	52.595	0	12.972	7.09471	2.06108e-07
Pg_S3109.23	Ribosomal protein S25 family protein	AT4G39200.1	Q75DJ1	AT4G39200.1 | Symbols: | Ribosomal protein S25 family protein | chr4:18257464-18258464 FORWARD LENGTH=108	40S ribosomal protein S25 OS=Ashbya gossypii (strain ATCC 10895 / CBS 109.51 / FGSC 9923 / NRRL Y-1056) GN=RPS25 PE=3 SV=1	26.0252	26.3694	26.0827	26.4237	27.4451	27.6628	27.7152	27.6759	26.015	26.3628	26.3302	26.2791	25.7049	25.3923	25.7457	25.7738	Cluster -2	1	26.7	13.493	0	31.469	8.04974	2.80219e-08
Pg_S1307.5	NADH dehydrogenase subunit J	ATCG00420.1	B8HLE8	ATCG00420.1 | Symbols: NDHJ | NADH dehydrogenase subunit J | chrC:48677-49153 REVERSE LENGTH=158	NAD(P)H-quinone oxidoreductase subunit K 2 OS=Cyanothece sp. (strain PCC 7425 / ATCC 29141) GN=ndhK2 PE=3 SV=1	23.3588	24.465	24.6214	24.7417	25.8681	25.726	25.7596	26.0938	23.7256	23.0122	22.9794	22.5041	22.6869	23.1234	23.2626	22.6057	Cluster -2	3	22.8	18.677	0	9.485	5.67363	4.17399e-06
Pg_S1200.9	ribosomal protein L22	ATCG00810.1	P07816	ATCG00810.1 | Symbols: RPL22 | ribosomal protein L22 | chrC:83467-83949 REVERSE LENGTH=160	30S ribosomal protein S19, chloroplastic OS=Glycine max GN=rps19 PE=3 SV=3	23.0911	23.5451	23.1726	24.0683	26.9807	27.2215	27.3614	27.1399	23.5976	23.9361	22.7064	24.0921	21.9974	22.0314	22.0346	22.0362	Cluster -2	3	14.2	21.843	0	16.288	8.61936	8.80061e-09
Pg_S1143.3	phototropin 2	AT5G58140.2	B4QK53	AT5G58140.2 | Symbols: PHOT2, NPL1 | phototropin 2 | chr5:23524771-23529993 FORWARD LENGTH=915	Serine/threonine-protein kinase PLK4 OS=Drosophila simulans GN=SAK PE=3 SV=1	22.5131	24.1155	24.6642	25.0485	26.6664	26.9083	26.7788	26.7286	24.5398	24.017	22.8321	22.2523	22.7484	22.8897	23.1731	23.5714	Cluster -2	6	10.8	101.63	0	23.843	4.0038	0.000152189
Pg_S1797.6	non-intrinsic ABC protein 8	AT4G25450.1	Q8LPQ6	AT4G25450.1 | Symbols: ATNAP8, NAP8 | non-intrinsic ABC protein 8 | chr4:13009845-13013912 REVERSE LENGTH=714	ABC transporter B family member 28 OS=Arabidopsis thaliana GN=ABCB28 PE=2 SV=1	23.2194	25.0913	24.5964	23.6078	26.3342	26.0951	26.3933	25.7108	23.4519	24.2735	22.5707	22.5853	22.1361	21.9737	23.9404	22.7599	Cluster -2	5	13.2	58.969	0	25.069	3.75059	0.000263284
Pg_S0974.1	P-loop containing nucleoside triphosphate hydrolases superfamily protein	AT1G08410.1	A8GM60	AT1G08410.1 | Symbols: | P-loop containing nucleoside triphosphate hydrolases superfamily protein | chr1:2646307-2649106 FORWARD LENGTH=589	Probable GTP-binding protein EngB OS=Rickettsia akari (strain Hartford) GN=engB PE=3 SV=1	24.5952	24.406	23.8617	24.6259	25.7965	26.8527	27.0722	25.6064	24.2131	24.3049	22.8483	23.8659	23.5192	23.6281	22.6088	24.0188	Cluster -2	5	26.3	35.597	0	14.903	4.01341	0.000149017
Pg_S1242.39	unknown protein; Has 640 Blast hits to 638 proteins in 201 species: Archae - 0; Bacteria - 293; Metazoa - 0; Fungi - 71; Plants - 72; Viruses - 0; Other Eukaryotes - 204 (source: NCBI BLink).	AT3G01060.1	unknown	AT3G01060.1 | Symbols: | unknown protein; Has 640 Blast hits to 638 proteins in 201 species: Archae - 0; Bacteria - 293; Metazoa - 0; Fungi - 71; Plants - 72; Viruses - 0; Other Eukaryotes - 204 (source: NCBI BLink). | chr3:16831-18782 REVERSE LENGTH=455	unknown	22.8903	23.858	23.9649	24.2933	24.78	24.608	25.033	24.9608	24.0152	23.5861	22.4991	22.4702	22.7983	21.8147	23.1549	22.5081	Cluster -2	2	6.9	49.926	0	6.7516	3.09926	0.0010826
Pg_S0423.32	germin 3	AT5G20630.1	P09351	AT5G20630.1 | Symbols: GLP3, GLP3A, GLP3B, ATGER3, GER3 | germin 3 | chr5:6975315-6975950 REVERSE LENGTH=211	Spherulin-1B OS=Physarum polycephalum PE=2 SV=1	23.557	23.8342	23.3831	24.4058	26.2421	26.4906	26.3654	23.5077	23.6109	24.2564	23.5583	22.2446	22.92	21.9776	22.7219	22.9192	Cluster -2	2	32.9	21.865	0	16.462	2.52497	0.00383502
Pg_S0085.69	photosystem II subunit Q-2	AT4G05180.1	P12852	AT4G05180.1 | Symbols: PSBQ, PSBQ-2, PSII-Q | photosystem II subunit Q-2 | chr4:2672093-2673170 REVERSE LENGTH=230	Oxygen-evolving enhancer protein 3, chloroplastic OS=Chlamydomonas reinhardtii GN=PSBQ PE=1 SV=1	24.2507	24.1071	23.9562	24.7171	26.7661	26.8772	26.7538	26.6721	23.1472	23.1952	22.7979	23.1364	22.7324	22.39	22.9694	22.9825	Cluster -2	3	19.5	24.559	0	12.681	10.1889	3.86225e-10
Pg_S0313.13	alpha/beta-Hydrolases superfamily protein	AT4G16820.1	Q9P979	AT4G16820.1 | Symbols: PLA-I{beta]2 | alpha/beta-Hydrolases superfamily protein | chr4:9467563-9469116 FORWARD LENGTH=517	Feruloyl esterase A OS=Aspergillus awamori GN=faeA PE=1 SV=3	26.5293	26.6264	26.5186	26.9518	27.1859	27.0593	27.093	27.0963	26.7961	26.6855	26.4708	26.8064	26.4816	26.4645	26.5459	26.4585	Cluster -2	7	53.7	18.254	0	35.995	3.7594	0.000258399
Pg_S4870.14	tRNA synthetase class I (I, L, M and V) family protein	AT4G10320.1	B8GQR1	AT4G10320.1 | Symbols: | tRNA synthetase class I (I, L, M and V) family protein | chr4:6397526-6404509 REVERSE LENGTH=1190	Isoleucine--tRNA ligase OS=Thioalkalivibrio sulfidiphilus (strain HL-EbGR7) GN=ileS PE=3 SV=1	23.8522	24.8325	23.2884	23.8624	26.2605	26.4597	26.2945	26.3006	22.9603	23.9389	23.3619	22.5619	22.7247	23.7401	23.2297	23.8315	Cluster -2	4	4.9	154.11	0	11.805	5.31264	8.97342e-06
Pg_S4131.8	little nuclei1	AT1G67230.1	unknown	AT1G67230.1 | Symbols: LINC1 | little nuclei1 | chr1:25151561-25156032 REVERSE LENGTH=1132	unknown	24.6121	24.7211	23.471	23.019	25.1191	25.007	24.9576	23.4722	22.6545	23.7358	23.2003	23.2942	22.2316	22.784	23.3069	22.2943	Cluster -2	5	5.6	135.92	0	16.087	2.19719	0.00788427
Pg_S4032.1	hydroxymethylbilane synthase	AT5G08280.1	B4S922	AT5G08280.1 | Symbols: HEMC | hydroxymethylbilane synthase | chr5:2663763-2665596 REVERSE LENGTH=382	Porphobilinogen deaminase OS=Prosthecochloris aestuarii (strain DSM 271 / SK 413) GN=hemC PE=3 SV=1	24.2288	24.8461	22.5307	23.6089	27.5141	27.4914	27.5628	27.3432	23.244	23.6941	23.6755	23.5715	23.2161	21.7411	22.8879	22.4573	Cluster -2	2	60.6	37.002	0	8.0853	6.40543	8.82028e-07
Pg_S2565.1	trigger factor type chaperone family protein	AT5G55220.1	Q2JV31	AT5G55220.1 | Symbols: | trigger factor type chaperone family protein | chr5:22397677-22400678 FORWARD LENGTH=547	Trigger factor OS=Synechococcus sp. (strain JA-3-3Ab) GN=tig PE=3 SV=1	24.6505	24.6716	23.8755	24.451	26.6918	26.6794	26.7344	26.6527	23.4079	23.622	22.9954	22.9012	23.3631	22.8331	22.8272	23.4911	Cluster -2	8	21.3	62.117	0	31.43	8.40945	1.34413e-08
Pg_S3706.3	unknown	unknown	unknown	unknown	unknown	25.1612	23.7413	23.7488	24.5363	26.2894	26.1523	26.2716	26.4425	23.8806	23.7237	22.5176	22.8005	23.3136	23.4777	22.6222	22.799	Cluster -2	2	13.5	23.295	0	7.4464	5.28014	9.6218e-06
Pg_S2428.16	ATP binding;valine-tRNA ligases;aminoacyl-tRNA ligases;nucleotide binding;ATP binding;aminoacyl-tRNA ligases	AT5G16715.1	P26640	AT5G16715.1 | Symbols: EMB2247 | ATP binding;valine-tRNA ligases;aminoacyl-tRNA ligases;nucleotide binding;ATP binding;aminoacyl-tRNA ligases | chr5:5485353-5493229 FORWARD LENGTH=974	Valine--tRNA ligase OS=Homo sapiens GN=VARS PE=1 SV=4	24.1422	24.5222	23.6118	23.34	27.0795	27.0079	27.0219	27.1062	23.0268	24.0462	22.1064	22.4807	21.6056	22.3794	21.9464	22.9742	Cluster -2	2	13.1	123.14	0	27.68	6.5238	6.85409e-07
Pg_S2476.14	Ribosomal protein L13 family protein	AT1G78630.1	Q8DEI9	AT1G78630.1 | Symbols: emb1473 | Ribosomal protein L13 family protein | chr1:29575997-29577406 FORWARD LENGTH=241	50S ribosomal protein L13 OS=Vibrio vulnificus (strain CMCP6) GN=rplM PE=3 SV=1	25.2112	23.9907	23.8802	23.7244	26.3942	26.7081	26.4723	26.5039	22.9737	23.7473	22.8868	23.1774	23.8895	22.4889	23.3203	22.6696	Cluster -2	4	25	26.825	0	19.121	5.73291	3.67394e-06
Pg_S5377.4	ABC2 homolog 13	AT5G64940.1	Q96D53	AT5G64940.1 | Symbols: ATATH13, ATH13, ATOSA1, OSA1 | ABC2 homolog 13 | chr5:25949116-25953326 FORWARD LENGTH=761	AarF domain-containing protein kinase 4 OS=Homo sapiens GN=ADCK4 PE=1 SV=2	25.0243	24.3029	23.5058	24.3113	26.0947	26.3138	26.2198	26.1189	23.9588	23.6164	24.8359	22.3584	22.9268	22.7522	22.7746	22.5908	Cluster -2	6	13.5	85.876	0	22.404	4.51925	4.96866e-05
Pg_S0886.3	RNA-binding (RRM/RBD/RNP motifs) family protein	AT4G14300.1	Q6GLB5	AT4G14300.1 | Symbols: | RNA-binding (RRM/RBD/RNP motifs) family protein | chr4:8231179-8232785 FORWARD LENGTH=411	ELAV-like protein 1 OS=Xenopus tropicalis GN=elavl1 PE=2 SV=1	25.1385	24.1272	23.1299	24.4069	26.9807	26.8018	26.7329	26.9016	23.6745	23.954	23.1593	23.1412	23.9502	22.5058	22.6444	23.8986	Cluster -2	1	28.5	27.696	0	20.441	5.11286	1.37845e-05
Pg_S6522.3	Apoptosis inhibitory protein 5 (API5)	AT2G34040.1	Q54CL0	AT2G34040.1 | Symbols: | Apoptosis inhibitory protein 5 (API5) | chr2:14377957-14382246 REVERSE LENGTH=553	Apoptosis inhibitor 5 homolog OS=Dictyostelium discoideum GN=api5 PE=3 SV=1	24.472	24.4678	22.5271	24.3786	24.5678	24.3487	24.6089	24.5605	23.241	23.9495	22.9138	22.4183	23.0308	22.866	23.2902	23.8902	Cluster -2	3	7.4	61.528	0	9.2319	1.55744	0.0316911
Pg_S0431.68	Peptidase M50 family protein	AT5G35220.1	Q852K0	AT5G35220.1 | Symbols: EGY1 | Peptidase M50 family protein | chr5:13484606-13487546 REVERSE LENGTH=548	Probable zinc metalloprotease EGY1, chloroplastic OS=Oryza sativa subsp. japonica GN=EGY1 PE=2 SV=3	24.9991	23.995	23.9751	24.1044	26.1705	26.0937	26.2033	26.1827	23.1228	24.3949	24.0205	22.0236	22.7285	23.1561	22.385	23.7531	Cluster -2	7	17.3	60.642	0	22.982	4.07678	0.000129959
Pg_S0072.6	Domain of unknown function (DUF1995)	AT3G20680.1	unknown	AT3G20680.1 | Symbols: | Domain of unknown function (DUF1995) | chr3:7230147-7231163 REVERSE LENGTH=338	unknown	25.1289	24.8702	24.0991	24.1067	26.736	26.8997	26.6129	26.9327	24.6477	23.5643	23.1783	23.1041	23.1924	22.7006	22.3829	22.7505	Cluster -2	6	28.9	38.839	0	50.134	6.44962	8.01038e-07
Pg_S0400.44	DEAD/DEAH box helicase, putative	AT3G02060.1	O51528	AT3G02060.1 | Symbols: | DEAD/DEAH box helicase, putative | chr3:354409-358319 FORWARD LENGTH=823	ATP-dependent DNA helicase RecG OS=Borrelia burgdorferi (strain ATCC 35210 / B31 / CIP 102532 / DSM 4680) GN=recG PE=3 SV=1	24.7353	23.7419	22.9866	24.4895	25.0522	25.8432	25.9131	25.9807	23.7406	23.5597	23.0103	22.9924	23.4819	23.6775	23.7874	23.8201	Cluster -2	6	6.6	125.41	0	18.399	4.00783	0.000150865
Pg_S6781.5	Ribosomal protein L23/L15e family protein	AT4G16720.1	P46289	AT4G16720.1 | Symbols: | Ribosomal protein L23/L15e family protein | chr4:9400156-9401315 REVERSE LENGTH=204	60S ribosomal protein L15 (Fragment) OS=Brassica napus GN=RPL15 PE=2 SV=1	28.8648	28.7066	28.9509	29.1195	29.5676	28.6508	29.0601	29.4122	28.5804	28.4558	28.5704	28.5388	29.2152	29.1352	29.1863	29.0858	Cluster -2	5	32.9	52.281	0	65.483	2.24383	0.00711819
Pg_S0992.60	zinc knuckle (CCHC-type) family protein	AT4G19190.1	Q5U2T8	AT4G19190.1 | Symbols: | zinc knuckle (CCHC-type) family protein | chr4:10493323-10495969 FORWARD LENGTH=595	Corepressor interacting with RBPJ 1 OS=Rattus norvegicus GN=Cir1 PE=2 SV=1	24.2101	24.2131	23.3899	24.6027	25.0367	24.3382	24.171	25.4231	23.5083	23.9325	23.6415	23.7886	24.9666	24.3008	24.3348	24.4408	Cluster -2	2	16.8	29.6	0	9.9294	1.5927	0.0292895
Pg_S1469.3	actin-related protein 4	AT1G18450.1	Q90X97	AT1G18450.1 | Symbols: ATARP4, ARP4 | actin-related protein 4 | chr1:6348199-6351766 FORWARD LENGTH=441	Actin, alpha skeletal muscle OS=Atractaspis microlepidota microlepidota GN=ACTA1 PE=2 SV=1	24.8947	23.0381	23.9057	23.6313	24.7434	22.7413	24.5393	25.0393	22.826	22.6337	22.7766	23.4935	24.8579	24.7532	24.9366	25.1583	Cluster -2	3	12	52.319	0	7.7159	2.01444	0.0116543
Pg_S2190.36	tryptophan synthase beta-subunit 1	AT5G54810.1	Q2YXX2	AT5G54810.1 | Symbols: TSB1, TRPB, TRP2, ATTSB1 | tryptophan synthase beta-subunit 1 | chr5:22264805-22266738 REVERSE LENGTH=470	Tryptophan synthase beta chain OS=Staphylococcus aureus (strain bovine RF122 / ET3-1) GN=trpB PE=3 SV=1	24.8287	24.397	24.4619	23.9668	24.7881	24.8599	25.1966	24.8928	21.984	23.2961	23.5571	23.3557	23.5923	23.6809	23.7343	23.6194	Cluster -2	2	8	43.926	0	12.344	3.80305	0.000235621
Pg_S1335.38	haloacid dehalogenase-like hydrolase family protein	AT5G53850.2	C5M5Z6	AT5G53850.2 | Symbols: | haloacid dehalogenase-like hydrolase family protein | chr5:21861155-21864817 REVERSE LENGTH=507	Enolase-phosphatase E1 OS=Candida tropicalis (strain ATCC MYA-3404 / T1) GN=UTR4 PE=3 SV=1	24.6406	23.4443	24.6749	23.2823	24.7813	24.6049	25.1367	24.4987	22.5514	23.8611	23.2917	23.7239	23.7336	23.9631	23.7696	23.336	Cluster -2	3	3.9	117.97	0	6.1358	1.85136	0.0165993
Pg_S3285.5	myo-inositol-1-phosphate synthase 2	AT2G22240.1	Q6FQI1	AT2G22240.1 | Symbols: ATMIPS2, MIPS2, ATIPS2 | myo-inositol-1-phosphate synthase 2 | chr2:9451901-9453938 REVERSE LENGTH=510	Inositol-3-phosphate synthase OS=Candida glabrata (strain ATCC 2001 / CBS 138 / JCM 3761 / NBRC 0622 / NRRL Y-65) GN=INO1 PE=3 SV=1	26.6213	24.4549	26.5712	22.8877	26.5735	25.9196	25.8989	25.6498	23.591	23.4503	24.168	23.3897	25.194	24.9533	25.0308	24.8757	Cluster -2	6	25.5	56.315	0	14.106	1.54253	0.0327332
Pg_S1306.29	unknown	unknown	unknown	unknown	unknown	23.4396	23.042	23.3761	23.2376	23.6741	23.3898	23.5753	23.4568	22.3736	22.4209	22.4254	22.2901	23.3712	23.6319	22.686	22.8534	Cluster -2	2	5.4	63.841	0	4.9896	3.7538	0.000261615
Pg_S0290.5	tocopherol cyclase, chloroplast / vitamin E deficient 1 (VTE1) / sucrose export defective 1 (SXD1)	AT4G32770.1	Q94FY8	AT4G32770.1 | Symbols: VTE1, ATSDX1 | tocopherol cyclase, chloroplast / vitamin E deficient 1 (VTE1) / sucrose export defective 1 (SXD1) | chr4:15804981-15807790 FORWARD LENGTH=488	Probable tocopherol cyclase, chloroplastic OS=Zea mays GN=SDX1 PE=2 SV=1	27.4422	23.2137	27.2251	24.4107	26.7501	23.391	26.7834	26.6373	22.7421	22.2041	23.1308	22.5775	24.0795	25.2007	22.2726	23.8029	Cluster -2	6	15	73.191	0	28.694	1.51991	0.0344019
Pg_S3565.8	rhodanese-like domain-containing protein / PPIC-type PPIASE domain-containing protein	AT5G19370.1	Q503Y7	AT5G19370.1 | Symbols: | rhodanese-like domain-containing protein / PPIC-type PPIASE domain-containing protein | chr5:6524247-6526629 REVERSE LENGTH=299	Peptidyl-prolyl cis-trans isomerase NIMA-interacting 4 OS=Danio rerio GN=pin4 PE=2 SV=1	24.278	24.6833	23.4636	24.0139	24.4969	24.4151	24.5246	25.0283	22.7705	23.2326	23.6019	22.4975	24.3431	23.8875	23.9308	22.9547	Cluster -2	2	13.7	41.249	0	18.489	2.40833	0.00495503
Pg_S0822.15	Phosphoglycerate mutase family protein	AT3G26780.1	unknown	AT3G26780.1 | Symbols: | Phosphoglycerate mutase family protein | chr3:9848747-9850277 FORWARD LENGTH=399	unknown	23.9722	22.8994	24.4232	23.4303	24.7997	24.9193	24.7783	24.6607	22.171	23.7097	23.1879	22.8728	24.0119	24.1988	24.3489	22.7987	Cluster -2	2	12.7	32.969	0	9.5353	2.13004	0.00909357
Pg_S0108.24	Aldolase-type TIM barrel family protein	AT5G13420.1	Q255E4	AT5G13420.1 | Symbols: | Aldolase-type TIM barrel family protein | chr5:4302080-4304212 REVERSE LENGTH=438	Transaldolase OS=Chlamydophila felis (strain Fe/C-56) GN=tal PE=3 SV=1	25.1742	24.975	24.888	24.8992	25.8312	25.9532	26.6202	26.676	23.0564	22.842	23.7516	22.4535	24.8134	24.2114	25.3999	22.1349	Cluster -2	2	46.1	32.884	0	13.436	3.17567	0.000917877
Pg_S0204.59	sorting nexin 1	AT5G06140.1	O60749	AT5G06140.1 | Symbols: SNX1, ATSNX1 | sorting nexin 1 | chr5:1856212-1858752 REVERSE LENGTH=402	Sorting nexin-2 OS=Homo sapiens GN=SNX2 PE=1 SV=2	24.9754	23.7317	24.3174	24.7136	27.2162	26.4368	26.6186	26.4561	22.4495	23.6549	23.086	22.1346	25.8678	24.4517	25.897	22.7486	Cluster -2	4	10.2	57.736	0	36.086	3.33212	0.000654541
Pg_S7499.3	early nodulin-like protein 1	AT5G53870.1	Q41001	AT5G53870.1 | Symbols: ENODL1, AtENODL1 | early nodulin-like protein 1 | chr5:21870033-21871228 REVERSE LENGTH=370	Blue copper protein OS=Pisum sativum PE=2 SV=1	31.5046	31.471	31.3374	31.4144	32.0484	32.1518	32.1104	31.8797	28.0429	27.8335	27.9814	27.8649	31.3395	31.32	31.3492	31.3715	Cluster -2	8	30.8	28.425	0	205.98	15.5556	1.34192e-14
Pg_S2924.17	Nucleotidylyl transferase superfamily protein	AT3G04600.1	Q9YA64	AT3G04600.1 | Symbols: | Nucleotidylyl transferase superfamily protein | chr3:1243152-1245958 FORWARD LENGTH=402	Tyrosine--tRNA ligase OS=Aeropyrum pernix (strain ATCC 700893 / DSM 11879 / JCM 9820 / NBRC 100138 / K1) GN=tyrS PE=1 SV=1	25.9736	26.2143	26.1015	26.0909	26.1215	26.1022	26.3806	26.1911	25.4198	25.4694	25.5567	25.6055	25.9534	26.0946	25.9869	26.0361	Cluster -2	2	19.5	45.33	0	22.432	5.83255	2.96966e-06
Pg_S3582.6	Eukaryotic initiation factor 4E protein	AT5G35620.1	Q6NU27	AT5G35620.1 | Symbols: LSP1, EIF(ISO)4E, LSP, EIF4E2, eIFiso4E | Eukaryotic initiation factor 4E protein | chr5:13824946-13826331 REVERSE LENGTH=198	Eukaryotic translation initiation factor 4E type 3-B OS=Xenopus laevis GN=eif4e3-b PE=2 SV=1	23.7651	24.0169	24.573	25.1473	25.329	24.8249	25.2844	24.8269	22.3327	21.4173	23.3484	22.2437	24.2618	24.2923	24.3645	24.4137	Cluster -2	2	11	22.788	0	7.0506	4.27767	8.38995e-05
Pg_S2377.23	RNA-binding KH domain-containing protein	AT3G04610.1	Q5RB68	AT3G04610.1 | Symbols: FLK | RNA-binding KH domain-containing protein | chr3:1250762-1254272 REVERSE LENGTH=577	Insulin-like growth factor 2 mRNA-binding protein 2 OS=Pongo abelii GN=IGF2BP2 PE=2 SV=1	27.0566	27.2568	27.2384	27.0151	27.3217	27.3782	27.5083	27.2232	26.3144	26.3733	26.2512	26.6527	26.937	26.9022	26.9535	26.8891	Cluster -2	5	24.6	50.984	0	51.497	6.02352	1.96377e-06
Pg_S2290.3	unknown	unknown	unknown	unknown	unknown	33.1569	33.3602	33.3741	24.3135	31.7922	31.7409	29.9603	32.3453	21.4995	22.8958	23.0955	23.006	23.2775	31.8974	32.0206	32.0852	Cluster -2	4	3.1	249.3	0	11.477	2.18014	0.00818258
Pg_S5290.5	gamma tonoplast intrinsic protein	AT2G36830.1	C8ZJM1	AT2G36830.1 | Symbols: GAMMA-TIP, TIP1;1, GAMMA-TIP1 | gamma tonoplast intrinsic protein | chr2:15445490-15446336 FORWARD LENGTH=251	Aquaporin-1 OS=Saccharomyces cerevisiae (strain Lalvin EC1118 / Prise de mousse) GN=AQY1 PE=2 SV=1	29.6586	29.9997	30.3181	30.3569	30.0855	30.3093	30.4042	30.4079	27.9897	27.9858	28.0478	27.7434	29.5087	29.8884	29.7617	29.8537	Cluster -2	2	13.8	26.13	0	33.806	8.15364	2.26247e-08
Pg_S1697.2	cinnamyl alcohol dehydrogenase 9	AT4G39330.1	Q83F39	AT4G39330.1 | Symbols: ATCAD9, CAD9 | cinnamyl alcohol dehydrogenase 9 | chr4:18291268-18292772 FORWARD LENGTH=360	L-threonine 3-dehydrogenase OS=Coxiella burnetii (strain RSA 493 / Nine Mile phase I) GN=tdh PE=3 SV=1	25.3578	25.1645	25.3282	25.1013	25.1612	25.3137	25.2787	25.268	22.6026	23.9073	24.4046	24.4574	25.4888	25.6269	25.7547	25.3716	Cluster -2	6	30.4	38.914	0	25.12	3.18517	0.000899299
Pg_S1660.8	Pectin lyase-like superfamily protein	AT1G60590.1	B8NJB0	AT1G60590.1 | Symbols: | Pectin lyase-like superfamily protein | chr1:22314426-22316867 REVERSE LENGTH=540	Putative galacturan 1,4-alpha-galacturonidase A OS=Aspergillus flavus (strain ATCC 200026 / FGSC A1120 / NRRL 3357 / JCM 12722 / SRRC 167) GN=rgxA PE=3 SV=2	27.578	27.4451	27.4744	27.2575	27.4306	27.4269	27.37	27.2251	22.6342	23.0144	23.4305	21.6253	27.6732	27.6988	27.7435	27.8127	Cluster -2	4	18.2	48.797	0	80.591	9.04568	3.71621e-09
Pg_S1213.2	ILITYHIA	AT1G64790.2	Q9C1W9	AT1G64790.2 | Symbols: ILA | ILITYHIA | chr1:24065232-24083403 REVERSE LENGTH=2696	DNA ligase 3 OS=Schizosaccharomyces pombe (strain 972 / ATCC 24843) GN=adl1 PE=3 SV=1	26.6357	26.8927	26.6472	26.6867	26.8275	26.8458	26.799	26.9197	26.2301	26.1142	26.1594	26.1308	26.4686	26.8919	26.5935	26.6041	Cluster -2	15	24.1	127.06	0	57.383	4.96687	1.88956e-05
Pg_S5302.3	SWAP (Suppressor-of-White-APricot)/surp domain-containing protein / ubiquitin family protein	AT1G14650.1	O13900	AT1G14650.1 | Symbols: | SWAP (Suppressor-of-White-APricot)/surp domain-containing protein / ubiquitin family protein | chr1:5028077-5030520 FORWARD LENGTH=785	Pre-mRNA-splicing factor sap114 OS=Schizosaccharomyces pombe (strain 972 / ATCC 24843) GN=sap114 PE=1 SV=1	25.1978	26.2299	24.9132	24.9798	25.6742	25.7725	25.454	25.3883	22.5455	23.0727	22.8347	23.2758	24.7758	24.9015	24.6616	24.8665	Cluster -2	6	13.6	84.636	0	15.461	6.03233	1.93264e-06
Pg_S0956.18	Leucine-rich repeat (LRR) family protein	AT1G33590.1	Q3V1N1	AT1G33590.1 | Symbols: | Leucine-rich repeat (LRR) family protein | chr1:12177788-12179221 FORWARD LENGTH=477	Malignant fibrous histiocytoma-amplified sequence 1 homolog OS=Mus musculus GN=Mfhas1 PE=2 SV=2	29.0276	28.9319	28.6969	28.6898	28.713	28.6054	28.5371	28.7328	23.9238	25.4488	26.4741	26.5173	29.2735	29.2433	28.9771	28.6718	Cluster -2	14	55.6	39.351	0	118.38	4.87395	2.29998e-05
Pg_S0548.12	Nucleotide/sugar transporter family protein	AT1G06470.1	Q8H184	AT1G06470.1 | Symbols: | Nucleotide/sugar transporter family protein | chr1:1970726-1973540 FORWARD LENGTH=414	Probable sugar phosphate/phosphate translocator At1g06470 OS=Arabidopsis thaliana GN=At1g06470 PE=2 SV=1	23.9454	24.621	24.4952	23.5521	24.5159	24.5372	24.4148	24.5954	22.5782	22.6599	22.919	22.6148	24.1454	24.2232	24.1503	24.1744	Cluster -2	2	7.6	46.578	0	7.0216	5.67454	4.17096e-06
[truncated: 1,694 more rows]

## Sheet: Fruit specific Proteins
Table 3. 65 proteins specifically identified in the fruit sample
[truncated: 66 more rows]

## Sheet: Leaf specific proteins
Table 4. 168 proteins specifically identified in the leaf sample
[truncated: 169 more rows]

## Sheet: Root specific proteins
Table 5. 88 proteins specifically identified in the root sample
[truncated: 89 more rows]

## Sheet: Shoot specific proteins
Table 6. 58 proteins specifically identified in the shoot sample
[truncated: 59 more rows]
