# Supplementary material for: Optimization of Protein Isolation and Label-Free Quantitative Proteomic Analysis in Four Different Tissues of Korean Ginseng
Source: Plants (Basel). 2021 Jul 9;10(7):1409. doi: 10.3390/plants10071409 (PMC8309323; doi:10.3390/plants10071409)
Supplement: Supplementary file 1 [file plants-10-01409-s001.zip › Table S3.xlsx]

## Sheet: GO of Cluster 1 & 2
Table 1. GO enrichment analysis of significant proteins in cluster 1 and 2 using AgriGO web-based software
GO_acc	Term_type	Term	queryitem	Percentage	entries	p-value	FDR	Cluster
GO:0009987	Biological process	cellular process	101	38.1132	AT4G27430.1, AT3G13920.2, AT3G46440.1, AT1G48480.1, AT4G33270.1, AT3G11130.1, AT1G33590.1, AT1G05850.1, AT3G08510.1, AT1G31730.1, AT5G07990.1, AT3G51240.1, AT1G43710.1, AT1G05170.2, AT4G18100.1, AT2G36830.1, AT4G24190.1, AT3G03780.1, AT5G49720.1, AT3G28715.1, AT5G05010.1, AT1G71830.1, AT1G08470.1, AT4G34450.1, AT3G01460.1, AT1G78900.1, AT2G24360.1, AT1G04980.1, AT2G19860.1, AT3G43300.1, AT4G13350…	1.4e-09	2.5e-08	Cluster_1
GO:0008152	Biological process	metabolic process	73	27.5472	AT3G01460.1, AT1G02780.1, AT4G27430.1, AT3G13920.2, AT3G46440.1, AT3G45780.1, AT5G26780.3, AT1G48480.1, AT2G36880.1, AT2G16530.1, AT1G63000.1, AT1G29660.1, AT5G58290.1, AT3G43190.1, AT1G05850.1, AT5G07990.1, AT3G51240.1, AT1G43710.1, AT4G13930.1, AT3G42050.1, AT1G53750.1, AT4G39210.1, AT4G24190.1, AT1G02500.1, AT4G35790.1, AT2G24360.1, AT4G33060.1, AT1G05170.2, AT4G34980.1, AT1G67730.1, AT3G56460…	0.0028	0.019	Cluster_1
GO:0044238	Biological process	primary metabolic process	61	23.0189	AT3G01460.1, AT1G02780.1, AT4G27430.1, AT3G13920.2, AT3G46440.1, AT3G45780.1, AT5G26780.3, AT1G48480.1, AT2G36880.1, AT2G16530.1, AT1G63000.1, AT1G29660.1, AT5G58290.1, AT3G43190.1, AT1G05850.1, AT5G07990.1, AT3G51240.1, AT1G43710.1, AT4G13930.1, AT3G42050.1, AT1G53750.1, AT4G39210.1, AT4G24190.1, AT2G24360.1, AT4G33060.1, AT1G05170.2, AT4G34980.1, AT1G67730.1, AT5G60390.1, AT2G27100.1, AT4G01850…	0.011	0.069	Cluster_1
GO:0044237	Biological process	cellular metabolic process	57	21.5094	AT3G01460.1, AT1G02780.1, AT4G27430.1, AT3G13920.2, AT3G46440.1, AT3G45780.1, AT5G26780.3, AT1G48480.1, AT2G36880.1, AT1G63000.1, AT5G58290.1, AT3G43190.1, AT1G05850.1, AT5G07990.1, AT3G51240.1, AT1G43710.1, AT4G13930.1, AT3G42050.1, AT1G53750.1, AT4G39210.1, AT4G24190.1, AT2G24360.1, AT4G33060.1, AT1G05170.2, AT1G30620.1, AT1G67730.1, AT5G60390.1, AT2G27100.1, AT4G01850.1, AT4G18100.1, AT2G18790…	0.023	0.14	Cluster_1
GO:0050896	Biological process	response to stimulus	42	15.8491	AT3G01460.1, AT4G27430.1, AT3G28860.1, AT1G04980.1, AT4G00430.1, AT2G19860.1, AT3G43300.1, AT1G10920.1, AT3G45780.1, AT5G64440.1, AT1G05850.1, AT2G44060.1, AT5G07990.1, AT2G02560.1, AT4G13350.1, AT5G12250.1, AT1G15520.1, AT5G09810.1, AT4G31820.1, AT2G27100.1, AT5G18170.1, AT1G69530.3, AT2G36830.1, AT2G18790.1, AT4G24190.1, AT1G75780.1, AT3G60240.4, AT4G32410.1, AT5G49720.1, AT1G33590.1, AT3G12050…	3.5e-22	3.8e-20	Cluster_1
GO:0009058	Biological process	biosynthetic process	40	15.0943	AT3G01460.1, AT1G02780.1, AT4G27430.1, AT3G13920.2, AT2G36880.1, AT1G63000.1, AT3G43190.1, AT1G05850.1, AT5G07990.1, AT3G51240.1, AT3G42050.1, AT5G52520.1, AT4G39210.1, AT1G05170.2, AT1G30620.1, AT5G60390.1, AT2G27100.1, AT1G67730.1, AT4G18100.1, AT2G18790.1, AT2G07050.1, AT1G74910.1, AT3G03780.1, AT4G32410.1, AT5G49720.1, AT5G49460.1, AT1G73370.1, AT5G48930.1, AT3G19820.1, AT4G01850.1, AT1G08200…	6.8e-23	1.3e-20	Cluster_1
GO:0044249	Biological process	cellular biosynthetic process	38	14.3396	AT3G01460.1, AT1G02780.1, AT4G27430.1, AT3G13920.2, AT2G36880.1, AT1G63000.1, AT3G43190.1, AT1G05850.1, AT5G07990.1, AT3G51240.1, AT3G42050.1, AT5G52520.1, AT4G39210.1, AT1G05170.2, AT1G30620.1, AT5G60390.1, AT2G27100.1, AT1G67730.1, AT4G18100.1, AT2G18790.1, AT2G07050.1, AT3G03780.1, AT4G32410.1, AT5G49720.1, AT5G49460.1, AT1G73370.1, AT5G48930.1, AT4G01850.1, AT1G08200.1, AT1G08470.1, AT1G09430…	2.3e-22	3.2e-20	Cluster_1
GO:0006810	Biological process	transport	37	13.9623	AT1G78900.1, AT4G00430.1, AT3G43300.1, AT2G16850.1, AT3G11130.1, AT3G28860.1, AT3G19960.2, AT1G31730.1, AT1G08190.1, AT4G13350.1, AT3G42050.1, AT1G15520.1, AT5G05010.1, AT3G46450.2, AT4G31820.1, AT1G52190.1, AT5G19320.1, AT2G36830.1, AT2G18790.1, AT4G24190.1, AT2G20760.1, AT2G27600.1, AT3G45780.1, AT4G34450.1, AT4G35100.1, AT1G04690.1, AT1G72160.1, AT2G14740.1, AT2G01970.1, AT1G62020.1, AT4G31480…	3e-26	1.5e-23	Cluster_1
GO:0051234	Biological process	establishment of localization	37	13.9623	AT1G78900.1, AT4G00430.1, AT3G43300.1, AT2G16850.1, AT3G11130.1, AT3G28860.1, AT3G19960.2, AT1G31730.1, AT1G08190.1, AT4G13350.1, AT3G42050.1, AT1G15520.1, AT5G05010.1, AT3G46450.2, AT4G31820.1, AT1G52190.1, AT5G19320.1, AT2G36830.1, AT2G18790.1, AT4G24190.1, AT2G20760.1, AT2G27600.1, AT3G45780.1, AT4G34450.1, AT4G35100.1, AT1G04690.1, AT1G72160.1, AT2G14740.1, AT2G01970.1, AT1G62020.1, AT4G31480…	4.1e-26	1.5e-23	Cluster_1
GO:0051179	Biological process	localization	37	13.9623	AT1G78900.1, AT4G00430.1, AT3G43300.1, AT2G16850.1, AT3G11130.1, AT3G28860.1, AT3G19960.2, AT1G31730.1, AT1G08190.1, AT4G13350.1, AT3G42050.1, AT1G15520.1, AT5G05010.1, AT3G46450.2, AT4G31820.1, AT1G52190.1, AT5G19320.1, AT2G36830.1, AT2G18790.1, AT4G24190.1, AT2G20760.1, AT2G27600.1, AT3G45780.1, AT4G34450.1, AT4G35100.1, AT1G04690.1, AT1G72160.1, AT2G14740.1, AT2G01970.1, AT1G62020.1, AT4G31480…	1.7e-25	4.3e-23	Cluster_1
GO:0065007	Biological process	biological regulation	31	11.6981	AT3G10380.1, AT3G01460.1, AT5G49720.1, AT2G19860.1, AT4G33270.1, AT3G28860.1, AT1G05850.1, AT3G08510.1, AT5G08370.1, AT3G45780.1, AT4G30340.1, AT5G52520.1, AT5G09810.1, AT4G31820.1, AT2G27100.1, AT1G69530.3, AT2G36830.1, AT2G18790.1, AT4G24190.1, AT1G75780.1, AT2G16600.1, AT5G16260.1, AT5G07120.1, AT1G33590.1, AT5G48930.1, AT3G19820.1, AT1G71830.1, AT2G40610.1, AT3G19980.1, AT1G12520.1, AT5G17020…	2.7e-14	1e-12	Cluster_1
GO:0032502	Biological process	developmental process	30	11.3208	AT3G10380.1, AT3G01460.1, AT1G78900.1, AT1G02780.1, AT3G28860.1, AT1G05850.1, AT5G08370.1, AT2G44060.1, AT2G02560.1, AT1G43710.1, AT5G52520.1, AT5G09810.1, AT4G31820.1, AT1G71440.1, AT2G07050.1, AT2G27100.1, AT1G67730.1, AT1G69530.3, AT2G18790.1, AT4G24190.1, AT1G75780.1, AT5G16260.1, AT5G49720.1, AT3G19820.1, AT1G71830.1, AT2G40610.1, AT1G23010.1, AT4G30340.1, AT3G19980.1, AT5G17020.1	2.9e-18	2.7e-16	Cluster_1
GO:0043170	Biological process	macromolecule metabolic process	29	10.9434	AT3G01460.1, AT1G02780.1, AT3G13920.2, AT2G24360.1, AT3G45780.1, AT1G48480.1, AT5G52520.1, AT5G58290.1, AT4G30810.1, AT1G53750.1, AT4G33060.1, AT1G05170.2, AT4G34980.1, AT5G60390.1, AT2G27100.1, AT4G18100.1, AT2G18790.1, AT4G24190.1, AT2G16600.1, AT1G25510.1, AT5G16260.1, AT4G32410.1, AT5G49720.1, AT4G39210.1, AT1G71830.1, AT4G37800.1, AT5G59240.1, AT1G12000.1, AT5G64570.1	1.3e-11	3.1e-10	Cluster_1
GO:0048856	Biological process	anatomical structure development	28	10.566	AT3G10380.1, AT3G01460.1, AT1G02780.1, AT3G28860.1, AT1G05850.1, AT5G08370.1, AT2G44060.1, AT2G02560.1, AT1G43710.1, AT5G52520.1, AT5G09810.1, AT4G31820.1, AT1G71440.1, AT2G27100.1, AT1G67730.1, AT1G69530.3, AT2G18790.1, AT4G24190.1, AT1G75780.1, AT5G16260.1, AT5G49720.1, AT3G19820.1, AT1G71830.1, AT2G40610.1, AT1G23010.1, AT4G30340.1, AT3G19980.1, AT5G17020.1	2.5e-22	3.2e-20	Cluster_1
GO:0032501	Biological process	multicellular organismal process	26	9.81132	AT3G10380.1, AT3G01460.1, AT1G78900.1, AT1G02780.1, AT3G28860.1, AT1G05850.1, AT5G08370.1, AT2G44060.1, AT2G02560.1, AT1G43710.1, AT5G52520.1, AT5G09810.1, AT4G31820.1, AT1G71440.1, AT2G07050.1, AT2G27100.1, AT1G67730.1, AT2G18790.1, AT4G24190.1, AT5G16260.1, AT3G45780.1, AT1G71830.1, AT1G23010.1, AT4G30340.1, AT3G19980.1, AT5G17020.1	2.2e-15	1.4e-13	Cluster_1
GO:0007275	Biological process	multicellular organismal development	25	9.43396	AT3G10380.1, AT3G01460.1, AT1G78900.1, AT1G02780.1, AT3G28860.1, AT1G05850.1, AT5G08370.1, AT2G44060.1, AT2G02560.1, AT1G43710.1, AT5G52520.1, AT5G09810.1, AT4G31820.1, AT1G71440.1, AT2G07050.1, AT2G27100.1, AT1G67730.1, AT2G18790.1, AT4G24190.1, AT5G16260.1, AT1G71830.1, AT1G23010.1, AT4G30340.1, AT3G19980.1, AT5G17020.1	8.1e-15	3.2e-13	Cluster_1
GO:0044260	Biological process	cellular macromolecule metabolic process	25	9.43396	AT3G01460.1, AT1G02780.1, AT3G13920.2, AT2G24360.1, AT3G45780.1, AT1G48480.1, AT5G52520.1, AT5G58290.1, AT1G53750.1, AT4G33060.1, AT1G05170.2, AT5G60390.1, AT2G27100.1, AT4G18100.1, AT2G18790.1, AT4G24190.1, AT2G16600.1, AT5G16260.1, AT4G37800.1, AT4G32410.1, AT5G49720.1, AT4G39210.1, AT1G71830.1, AT5G59240.1, AT1G12000.1	9.4e-10	1.8e-08	Cluster_1
GO:0009628	Biological process	response to abiotic stimulus	23	8.67925	AT3G01460.1, AT4G27430.1, AT3G45780.1, AT4G00430.1, AT3G28860.1, AT1G05850.1, AT2G44060.1, AT5G07990.1, AT3G51240.1, AT5G12250.1, AT5G09810.1, AT4G31820.1, AT1G69530.3, AT2G18790.1, AT4G24190.1, AT1G75780.1, AT4G32410.1, AT5G49720.1, AT3G19820.1, AT5G18170.1, AT5G04530.1, AT5G58070.1, AT4G35790.1	4.5e-17	3.7e-15	Cluster_1
GO:0006807	Biological process	nitrogen compound metabolic process	23	8.67925	AT3G01460.1, AT4G27430.1, AT3G46440.1, AT5G26780.3, AT2G36880.1, AT1G63000.1, AT4G13930.1, AT1G43710.1, AT3G42050.1, AT5G52520.1, AT1G30620.1, AT2G27100.1, AT4G01850.1, AT2G18790.1, AT5G16260.1, AT3G03780.1, AT5G18170.1, AT1G08200.1, AT1G08470.1, AT1G23820.1, AT5G03300.1, AT3G28715.1, AT1G02500.1	2.8e-10	5.9e-09	Cluster_1
GO:0050789	Biological process	regulation of biological process	21	7.92453	AT1G71830.1, AT3G08510.1, AT3G01460.1, AT5G08370.1, AT2G36830.1, AT2G18790.1, AT4G30340.1, AT2G16600.1, AT2G27100.1, AT5G52520.1, AT2G19860.1, AT5G48930.1, AT4G33270.1, AT4G31820.1, AT5G16260.1, AT4G24190.1, AT5G07120.1, AT3G19980.1, AT1G33590.1, AT3G45780.1, AT1G05850.1	3.6e-08	5.3e-07	Cluster_1
GO:0019538	Biological process	protein metabolic process	19	7.16981	AT1G71830.1, AT4G18100.1, AT3G45780.1, AT3G13920.2, AT4G24190.1, AT2G24360.1, AT1G02780.1, AT2G16600.1, AT1G48480.1, AT1G25510.1, AT1G53750.1, AT5G59240.1, AT5G52520.1, AT5G58290.1, AT4G33060.1, AT1G05170.2, AT4G34980.1, AT4G30810.1, AT5G60390.1	9.7e-12	2.4e-10	Cluster_1
GO:0042221	Biological process	response to chemical stimulus	19	7.16981	AT1G71830.1, AT2G27100.1, AT1G69530.3, AT2G44060.1, AT2G36830.1, AT2G02560.1, AT4G24190.1, AT2G18790.1, AT1G15520.1, AT4G00430.1, AT4G08950.1, AT5G09810.1, AT5G13420.1, AT2G19860.1, AT1G10920.1, AT3G18190.1, AT1G05850.1, AT1G12000.1, AT3G28860.1	1.3e-10	2.9e-09	Cluster_1
GO:0006950	Biological process	response to stress	19	7.16981	AT2G18790.1, AT3G12050.1, AT2G44060.1, AT3G43300.1, AT4G24190.1, AT5G49720.1, AT1G04980.1, AT4G00430.1, AT1G23010.1, AT5G09810.1, AT5G58070.1, AT4G35790.1, AT5G12250.1, AT4G32410.1, AT1G10920.1, AT1G33590.1, AT5G64440.1, AT1G05850.1, AT5G04530.1	2.4e-10	5.3e-09	Cluster_1
GO:0051649	Biological process	establishment of localization in cell	18	6.79245	AT2G14740.1, AT5G19320.1, AT1G31730.1, AT4G31480.1, AT3G45780.1, AT3G19960.2, AT4G13350.1, AT1G62020.1, AT2G20760.1, AT2G16950.1, AT3G11130.1, AT4G24190.1, AT1G08190.1, AT4G34450.1, AT5G22780.1, AT2G44610.1, AT5G05010.1, AT5G17020.1	5.4e-10	1.1e-08	Cluster_1
GO:0051641	Biological process	cellular localization	18	6.79245	AT2G14740.1, AT5G19320.1, AT1G31730.1, AT4G31480.1, AT3G45780.1, AT3G19960.2, AT4G13350.1, AT1G62020.1, AT2G20760.1, AT2G16950.1, AT3G11130.1, AT4G24190.1, AT1G08190.1, AT4G34450.1, AT5G22780.1, AT2G44610.1, AT5G05010.1, AT5G17020.1	2.2e-09	3.6e-08	Cluster_1
GO:0016043	Biological process	cellular component organization	18	6.79245	AT2G27100.1, AT3G10380.1, AT1G69530.3, AT1G78900.1, AT3G45780.1, AT4G14960.2, AT2G07050.1, AT1G75780.1, AT2G40610.1, AT2G41740.1, AT5G09810.1, AT2G27600.1, AT2G16950.1, AT1G71440.1, AT5G49720.1, AT3G19820.1, AT2G19770.1, AT5G17020.1	4.6e-05	0.00041	Cluster_1
GO:0044267	Biological process	cellular protein metabolic process	16	6.03774	AT1G71830.1, AT4G18100.1, AT3G45780.1, AT3G13920.2, AT4G24190.1, AT2G24360.1, AT1G02780.1, AT2G16600.1, AT1G48480.1, AT1G53750.1, AT5G59240.1, AT5G52520.1, AT5G58290.1, AT4G33060.1, AT1G05170.2, AT5G60390.1	1.2e-09	2.2e-08	Cluster_1
GO:0050794	Biological process	regulation of cellular process	16	6.03774	AT1G71830.1, AT3G08510.1, AT3G01460.1, AT2G36830.1, AT2G18790.1, AT4G30340.1, AT2G16600.1, AT2G27100.1, AT5G52520.1, AT2G19860.1, AT5G48930.1, AT4G33270.1, AT5G07120.1, AT1G33590.1, AT3G45780.1, AT1G05850.1	7.1e-06	7.2e-05	Cluster_1
GO:0046907	Biological process	intracellular transport	15	5.66038	AT2G14740.1, AT5G19320.1, AT1G31730.1, AT4G31480.1, AT3G19960.2, AT4G13350.1, AT1G62020.1, AT2G20760.1, AT2G16950.1, AT3G11130.1, AT1G08190.1, AT4G34450.1, AT5G22780.1, AT5G05010.1, AT5G17020.1	2.5e-16	1.9e-14	Cluster_1
GO:0009416	Biological process	response to light stimulus	15	5.66038	AT5G18170.1, AT3G01460.1, AT4G27430.1, AT5G07990.1, AT3G51240.1, AT1G75780.1, AT2G18790.1, AT5G04530.1, AT5G09810.1, AT4G31820.1, AT5G58070.1, AT3G28860.1, AT3G45780.1, AT1G69530.3, AT3G19820.1	2.4e-07	3.2e-06	Cluster_1
GO:0009314	Biological process	response to radiation	15	5.66038	AT5G18170.1, AT3G01460.1, AT4G27430.1, AT5G07990.1, AT3G51240.1, AT1G75780.1, AT2G18790.1, AT5G04530.1, AT5G09810.1, AT4G31820.1, AT5G58070.1, AT3G28860.1, AT3G45780.1, AT1G69530.3, AT3G19820.1	3.6e-07	4.5e-06	Cluster_1
GO:0009791	Biological process	post-embryonic development	15	5.66038	AT1G71830.1, AT3G01460.1, AT5G08370.1, AT2G44060.1, AT2G02560.1, AT1G43710.1, AT2G18790.1, AT5G52520.1, AT5G16260.1, AT5G09810.1, AT4G31820.1, AT1G71440.1, AT3G28860.1, AT3G19980.1, AT1G02780.1	1.9e-06	2.2e-05	Cluster_1
GO:0006139	Biological process	nucleobase, nucleoside, nucleotide and nucleic acid metabolic process	15	5.66038	AT2G27100.1, AT4G01850.1, AT3G01460.1, AT2G18790.1, AT3G46440.1, AT3G42050.1, AT1G08200.1, AT5G52520.1, AT5G16260.1, AT2G36880.1, AT1G63000.1, AT5G03300.1, AT3G28715.1, AT1G30620.1, AT1G02500.1	4.7e-06	5e-05	Cluster_1
GO:0003006	Biological process	reproductive developmental process	15	5.66038	AT1G71830.1, AT3G10380.1, AT3G01460.1, AT5G08370.1, AT2G44060.1, AT2G02560.1, AT1G43710.1, AT5G52520.1, AT5G16260.1, AT4G31820.1, AT1G71440.1, AT3G28860.1, AT3G19980.1, AT1G02780.1, AT5G17020.1	0.0001	0.00085	Cluster_1
GO:0022414	Biological process	reproductive process	15	5.66038	AT1G71830.1, AT3G10380.1, AT3G01460.1, AT5G08370.1, AT2G44060.1, AT2G02560.1, AT1G43710.1, AT5G52520.1, AT5G16260.1, AT4G31820.1, AT1G71440.1, AT3G28860.1, AT3G19980.1, AT1G02780.1, AT5G17020.1	0.00069	0.005	Cluster_1
GO:0000003	Biological process	reproduction	15	5.66038	AT1G71830.1, AT3G10380.1, AT3G01460.1, AT5G08370.1, AT2G44060.1, AT2G02560.1, AT1G43710.1, AT5G52520.1, AT5G16260.1, AT4G31820.1, AT1G71440.1, AT3G28860.1, AT3G19980.1, AT1G02780.1, AT5G17020.1	0.00081	0.0059	Cluster_1
GO:0008104	Biological process	protein localization	14	5.28302	AT1G31730.1, AT4G31480.1, AT1G08190.1, AT2G14740.1, AT1G62020.1, AT2G20760.1, AT4G31820.1, AT2G16950.1, AT3G11130.1, AT4G24190.1, AT4G34450.1, AT5G22780.1, AT5G05010.1, AT5G17020.1	3.9e-16	2.7e-14	Cluster_1
GO:0033036	Biological process	macromolecule localization	14	5.28302	AT1G31730.1, AT4G31480.1, AT1G08190.1, AT2G14740.1, AT1G62020.1, AT2G20760.1, AT4G31820.1, AT2G16950.1, AT3G11130.1, AT4G24190.1, AT4G34450.1, AT5G22780.1, AT5G05010.1, AT5G17020.1	5.2e-15	2.3e-13	Cluster_1
GO:0006519	Biological process	cellular amino acid and derivative metabolic process	14	5.28302	AT4G01850.1, AT4G27430.1, AT5G07990.1, AT3G51240.1, AT1G43710.1, AT5G26780.3, AT5G52520.1, AT5G48930.1, AT1G23820.1, AT3G03780.1, AT2G36880.1, AT4G13930.1, AT1G05850.1, AT1G02500.1	6.4e-06	6.7e-05	Cluster_1
GO:0065008	Biological process	regulation of biological quality	14	5.28302	AT3G10380.1, AT1G69530.3, AT2G18790.1, AT1G75780.1, AT2G40610.1, AT3G28860.1, AT5G48930.1, AT5G09810.1, AT4G31820.1, AT5G49720.1, AT3G19820.1, AT1G05850.1, AT1G12520.1, AT5G17020.1	1.5e-05	0.00015	Cluster_1
GO:0045184	Biological process	establishment of protein localization	13	4.90566	AT1G31730.1, AT4G31480.1, AT1G08190.1, AT2G14740.1, AT1G62020.1, AT2G20760.1, AT2G16950.1, AT3G11130.1, AT4G24190.1, AT4G34450.1, AT5G22780.1, AT5G05010.1, AT5G17020.1	3.3e-15	1.8e-13	Cluster_1
GO:0015031	Biological process	protein transport	13	4.90566	AT1G31730.1, AT4G31480.1, AT1G08190.1, AT2G14740.1, AT1G62020.1, AT2G20760.1, AT2G16950.1, AT3G11130.1, AT4G24190.1, AT4G34450.1, AT5G22780.1, AT5G05010.1, AT5G17020.1	3.3e-15	1.8e-13	Cluster_1
GO:0010033	Biological process	response to organic substance	13	4.90566	AT1G71830.1, AT2G27100.1, AT1G69530.3, AT2G36830.1, AT2G02560.1, AT2G18790.1, AT1G15520.1, AT4G08950.1, AT5G09810.1, AT2G19860.1, AT1G10920.1, AT1G05850.1, AT3G28860.1	2.1e-09	3.6e-08	Cluster_1
GO:0034645	Biological process	cellular macromolecule biosynthetic process	13	4.90566	AT2G27100.1, AT3G01460.1, AT4G18100.1, AT3G13920.2, AT1G02780.1, AT2G18790.1, AT5G52520.1, AT5G59240.1, AT4G32410.1, AT5G49720.1, AT1G05170.2, AT4G39210.1, AT5G60390.1	1.9e-05	0.00018	Cluster_1
GO:0009059	Biological process	macromolecule biosynthetic process	13	4.90566	AT2G27100.1, AT3G01460.1, AT4G18100.1, AT3G13920.2, AT1G02780.1, AT2G18790.1, AT5G52520.1, AT5G59240.1, AT4G32410.1, AT5G49720.1, AT1G05170.2, AT4G39210.1, AT5G60390.1	2e-05	0.00018	Cluster_1
GO:0043436	Biological process	oxoacid metabolic process	13	4.90566	AT4G01850.1, AT1G67730.1, AT2G18790.1, AT1G43710.1, AT5G26780.3, AT3G24360.1, AT5G52520.1, AT2G36880.1, AT3G03780.1, AT4G35790.1, AT4G13930.1, AT1G05850.1, AT1G02500.1	0.00031	0.0024	Cluster_1
GO:0019752	Biological process	carboxylic acid metabolic process	13	4.90566	AT4G01850.1, AT1G67730.1, AT2G18790.1, AT1G43710.1, AT5G26780.3, AT3G24360.1, AT5G52520.1, AT2G36880.1, AT3G03780.1, AT4G35790.1, AT4G13930.1, AT1G05850.1, AT1G02500.1	0.00031	0.0024	Cluster_1
GO:0006082	Biological process	organic acid metabolic process	13	4.90566	AT4G01850.1, AT1G67730.1, AT2G18790.1, AT1G43710.1, AT5G26780.3, AT3G24360.1, AT5G52520.1, AT2G36880.1, AT3G03780.1, AT4G35790.1, AT4G13930.1, AT1G05850.1, AT1G02500.1	0.00031	0.0025	Cluster_1
GO:0042180	Biological process	cellular ketone metabolic process	13	4.90566	AT4G01850.1, AT1G67730.1, AT2G18790.1, AT1G43710.1, AT5G26780.3, AT3G24360.1, AT5G52520.1, AT2G36880.1, AT3G03780.1, AT4G35790.1, AT4G13930.1, AT1G05850.1, AT1G02500.1	0.00038	0.003	Cluster_1
GO:0048608	Biological process	reproductive structure development	13	4.90566	AT1G71830.1, AT3G01460.1, AT5G08370.1, AT2G44060.1, AT2G02560.1, AT1G43710.1, AT5G52520.1, AT5G16260.1, AT4G31820.1, AT1G71440.1, AT3G28860.1, AT3G19980.1, AT1G02780.1	0.0011	0.0079	Cluster_1
GO:0006886	Biological process	intracellular protein transport	12	4.5283	AT1G31730.1, AT4G31480.1, AT1G08190.1, AT2G14740.1, AT1G62020.1, AT2G20760.1, AT2G16950.1, AT3G11130.1, AT4G34450.1, AT5G22780.1, AT5G05010.1, AT5G17020.1	5e-15	2.3e-13	Cluster_1
GO:0034613	Biological process	cellular protein localization	12	4.5283	AT1G31730.1, AT4G31480.1, AT1G08190.1, AT2G14740.1, AT1G62020.1, AT2G20760.1, AT2G16950.1, AT3G11130.1, AT4G34450.1, AT5G22780.1, AT5G05010.1, AT5G17020.1	5e-15	2.3e-13	Cluster_1
GO:0070727	Biological process	cellular macromolecule localization	12	4.5283	AT1G31730.1, AT4G31480.1, AT1G08190.1, AT2G14740.1, AT1G62020.1, AT2G20760.1, AT2G16950.1, AT3G11130.1, AT4G34450.1, AT5G22780.1, AT5G05010.1, AT5G17020.1	6.1e-15	2.6e-13	Cluster_1
GO:0009653	Biological process	anatomical structure morphogenesis	12	4.5283	AT3G10380.1, AT3G01460.1, AT5G08370.1, AT4G24190.1, AT1G75780.1, AT2G40610.1, AT1G69530.3, AT5G09810.1, AT5G49720.1, AT3G19820.1, AT1G05850.1, AT5G17020.1	2.5e-12	7.2e-11	Cluster_1
GO:0034641	Biological process	cellular nitrogen compound metabolic process	12	4.5283	AT4G01850.1, AT4G27430.1, AT1G43710.1, AT1G08470.1, AT5G26780.3, AT5G52520.1, AT2G36880.1, AT1G23820.1, AT3G03780.1, AT5G03300.1, AT4G13930.1, AT1G02500.1	3.5e-12	9.7e-11	Cluster_1
GO:0005975	Biological process	carbohydrate metabolic process	12	4.5283	AT3G46440.1, AT4G37800.1, AT1G63000.1, AT1G05170.2, AT4G32410.1, AT5G49720.1, AT1G73370.1, AT1G30620.1, AT3G43190.1, AT4G39210.1, AT1G12000.1, AT5G64570.1	0.0019	0.013	Cluster_1
GO:0040007	Biological process	growth	11	4.15094	AT3G10380.1, AT1G69530.3, AT5G09810.1, AT4G24190.1, AT1G75780.1, AT2G40610.1, AT3G43300.1, AT5G49720.1, AT3G19820.1, AT1G05850.1, AT5G17020.1	1.9e-13	6.6e-12	Cluster_1
GO:0016192	Biological process	vesicle-mediated transport	11	4.15094	AT1G31730.1, AT3G43300.1, AT4G31480.1, AT1G62020.1, AT2G20760.1, AT2G27600.1, AT3G11130.1, AT1G08190.1, AT4G34450.1, AT5G22780.1, AT5G05010.1	3.6e-12	9.7e-11	Cluster_1
GO:0044262	Biological process	cellular carbohydrate metabolic process	11	4.15094	AT3G46440.1, AT4G37800.1, AT1G63000.1, AT1G05170.2, AT4G32410.1, AT5G49720.1, AT1G73370.1, AT1G30620.1, AT3G43190.1, AT4G39210.1, AT1G12000.1	1e-10	2.4e-09	Cluster_1
GO:0048513	Biological process	organ development	11	4.15094	AT2G27100.1, AT3G01460.1, AT5G08370.1, AT4G30340.1, AT1G23010.1, AT5G52520.1, AT5G09810.1, AT4G31820.1, AT3G28860.1, AT4G24190.1, AT1G05850.1	0.0031	0.02	Cluster_1
GO:0048731	Biological process	system development	11	4.15094	AT2G27100.1, AT3G01460.1, AT5G08370.1, AT4G30340.1, AT1G23010.1, AT5G52520.1, AT5G09810.1, AT4G31820.1, AT3G28860.1, AT4G24190.1, AT1G05850.1	0.0031	0.02	Cluster_1
GO:0006629	Biological process	lipid metabolic process	11	4.15094	AT1G67730.1, AT4G16820.1, AT2G18790.1, AT3G24360.1, AT2G16530.1, AT2G07050.1, AT1G29660.1, AT5G23960.1, AT3G19820.1, AT4G35790.1, AT4G11820.2	0.0039	0.025	Cluster_1
GO:0008361	Biological process	regulation of cell size	10	3.77358	AT3G10380.1, AT1G69530.3, AT1G75780.1, AT2G40610.1, AT3G28860.1, AT5G09810.1, AT5G49720.1, AT5G17020.1, AT1G05850.1, AT3G19820.1	2.2e-13	7.2e-12	Cluster_1
GO:0032535	Biological process	regulation of cellular component size	10	3.77358	AT3G10380.1, AT1G69530.3, AT1G75780.1, AT2G40610.1, AT3G28860.1, AT5G09810.1, AT5G49720.1, AT5G17020.1, AT1G05850.1, AT3G19820.1	2.8e-13	8.5e-12	Cluster_1
GO:0090066	Biological process	regulation of anatomical structure size	10	3.77358	AT3G10380.1, AT1G69530.3, AT1G75780.1, AT2G40610.1, AT3G28860.1, AT5G09810.1, AT5G49720.1, AT5G17020.1, AT1G05850.1, AT3G19820.1	2.8e-13	8.5e-12	Cluster_1
GO:0048869	Biological process	cellular developmental process	10	3.77358	AT1G71830.1, AT3G10380.1, AT1G69530.3, AT1G75780.1, AT2G40610.1, AT5G09810.1, AT5G49720.1, AT3G19820.1, AT1G05850.1, AT5G17020.1	1.1e-10	2.4e-09	Cluster_1
GO:0006996	Biological process	organelle organization	10	3.77358	AT2G27100.1, AT1G78900.1, AT4G14960.2, AT2G07050.1, AT2G19770.1, AT3G45780.1, AT2G41740.1, AT5G09810.1, AT2G27600.1, AT5G49720.1	0.0015	0.011	Cluster_1
GO:0009719	Biological process	response to endogenous stimulus	10	3.77358	AT1G71830.1, AT1G69530.3, AT2G36830.1, AT2G02560.1, AT2G18790.1, AT1G15520.1, AT4G08950.1, AT5G09810.1, AT3G28860.1, AT1G05850.1	0.04	0.24	Cluster_1
GO:0048589	Biological process	developmental growth	9	3.39623	AT3G10380.1, AT1G69530.3, AT4G24190.1, AT1G75780.1, AT2G40610.1, AT5G09810.1, AT5G49720.1, AT5G17020.1, AT3G19820.1	1.8e-13	6.3e-12	Cluster_1
GO:0016049	Biological process	cell growth	9	3.39623	AT3G10380.1, AT1G69530.3, AT1G75780.1, AT2G40610.1, AT5G09810.1, AT5G49720.1, AT5G17020.1, AT1G05850.1, AT3G19820.1	8.1e-12	2.1e-10	Cluster_1
GO:0042398	Biological process	cellular amino acid derivative biosynthetic process	9	3.39623	AT4G01850.1, AT4G27430.1, AT5G07990.1, AT3G51240.1, AT1G05850.1, AT1G23820.1, AT2G36880.1, AT5G48930.1, AT1G02500.1	3.3e-10	6.6e-09	Cluster_1
GO:0044106	Biological process	cellular amine metabolic process	9	3.39623	AT4G01850.1, AT1G43710.1, AT5G26780.3, AT5G52520.1, AT2G36880.1, AT1G23820.1, AT3G03780.1, AT4G13930.1, AT1G02500.1	7.3e-10	1.4e-08	Cluster_1
GO:0006575	Biological process	cellular amino acid derivative metabolic process	9	3.39623	AT4G01850.1, AT4G27430.1, AT5G07990.1, AT3G51240.1, AT1G05850.1, AT1G23820.1, AT2G36880.1, AT5G48930.1, AT1G02500.1	1.2e-09	2.2e-08	Cluster_1
GO:0044085	Biological process	cellular component biogenesis	9	3.39623	AT1G02780.1, AT2G38080.1, AT5G59240.1, AT2G16950.1, AT1G71440.1, AT4G32410.1, AT4G18100.1, AT1G30620.1, AT5G17020.1	3.4e-09	5.4e-08	Cluster_1
GO:0009308	Biological process	amine metabolic process	9	3.39623	AT4G01850.1, AT1G43710.1, AT5G26780.3, AT5G52520.1, AT2G36880.1, AT1G23820.1, AT3G03780.1, AT4G13930.1, AT1G02500.1	5.7e-09	8.7e-08	Cluster_1
GO:0019748	Biological process	secondary metabolic process	9	3.39623	AT4G27430.1, AT5G07990.1, AT3G51240.1, AT1G08470.1, AT2G18790.1, AT1G05850.1, AT2G07050.1, AT5G23960.1, AT5G48930.1	0.0011	0.0082	Cluster_1
GO:0010467	Biological process	gene expression	9	3.39623	AT2G27100.1, AT3G01460.1, AT4G18100.1, AT3G13920.2, AT2G18790.1, AT5G52520.1, AT5G59240.1, AT1G02780.1, AT5G60390.1	0.013	0.08	Cluster_1
GO:0006520	Biological process	cellular amino acid metabolic process	8	3.01887	AT4G01850.1, AT1G43710.1, AT5G26780.3, AT5G52520.1, AT2G36880.1, AT3G03780.1, AT4G13930.1, AT1G02500.1	1.5e-08	2.3e-07	Cluster_1
GO:0009790	Biological process	embryonic development	8	3.01887	AT1G71830.1, AT1G67730.1, AT2G44060.1, AT1G43710.1, AT4G31820.1, AT1G71440.1, AT3G19980.1, AT1G02780.1	6e-08	8.6e-07	Cluster_1
GO:0044271	Biological process	cellular nitrogen compound biosynthetic process	8	3.01887	AT4G01850.1, AT4G27430.1, AT1G08470.1, AT2G36880.1, AT1G23820.1, AT3G03780.1, AT5G03300.1, AT1G02500.1	6.6e-08	9.3e-07	Cluster_1
GO:0006725	Biological process	cellular aromatic compound metabolic process	8	3.01887	AT4G01850.1, AT4G27430.1, AT5G07990.1, AT3G51240.1, AT1G05850.1, AT2G36880.1, AT5G48930.1, AT1G02500.1	1.1e-07	1.5e-06	Cluster_1
GO:0048316	Biological process	seed development	8	3.01887	AT1G71830.1, AT2G44060.1, AT1G43710.1, AT5G52520.1, AT4G31820.1, AT1G71440.1, AT3G19980.1, AT1G02780.1	1.5e-07	1.9e-06	Cluster_1
GO:0010154	Biological process	fruit development	8	3.01887	AT1G71830.1, AT2G44060.1, AT1G43710.1, AT5G52520.1, AT4G31820.1, AT1G71440.1, AT3G19980.1, AT1G02780.1	2.8e-07	3.5e-06	Cluster_1
GO:0032989	Biological process	cellular component morphogenesis	7	2.64151	AT3G10380.1, AT1G69530.3, AT1G75780.1, AT2G40610.1, AT5G49720.1, AT5G17020.1, AT3G19820.1	2.1e-09	3.6e-08	Cluster_1
GO:0034637	Biological process	cellular carbohydrate biosynthetic process	7	2.64151	AT1G63000.1, AT4G32410.1, AT5G49720.1, AT1G73370.1, AT1G30620.1, AT3G43190.1, AT4G39210.1	4e-09	6.2e-08	Cluster_1
GO:0009266	Biological process	response to temperature stimulus	7	2.64151	AT2G18790.1, AT5G58070.1, AT4G24190.1, AT5G12250.1, AT5G04530.1, AT4G35790.1, AT1G05850.1	8.5e-08	1.2e-06	Cluster_1
GO:0009793	Biological process	embryonic development ending in seed dormancy	7	2.64151	AT1G71830.1, AT2G44060.1, AT1G43710.1, AT4G31820.1, AT1G71440.1, AT3G19980.1, AT1G02780.1	7.3e-07	8.9e-06	Cluster_1
GO:0016051	Biological process	carbohydrate biosynthetic process	7	2.64151	AT1G63000.1, AT4G32410.1, AT5G49720.1, AT1G73370.1, AT1G30620.1, AT3G43190.1, AT4G39210.1	1.1e-06	1.3e-05	Cluster_1
GO:0060560	Biological process	developmental growth involved in morphogenesis	7	2.64151	AT3G10380.1, AT1G69530.3, AT1G75780.1, AT2G40610.1, AT5G49720.1, AT5G17020.1, AT3G19820.1	9.6e-05	0.0008	Cluster_1
GO:0009826	Biological process	unidimensional cell growth	7	2.64151	AT3G10380.1, AT1G69530.3, AT1G75780.1, AT2G40610.1, AT5G49720.1, AT5G17020.1, AT3G19820.1	9.6e-05	0.0008	Cluster_1
GO:0000902	Biological process	cell morphogenesis	7	2.64151	AT3G10380.1, AT1G69530.3, AT1G75780.1, AT2G40610.1, AT5G49720.1, AT5G17020.1, AT3G19820.1	0.00049	0.0036	Cluster_1
GO:0031323	Biological process	regulation of cellular metabolic process	7	2.64151	AT2G27100.1, AT3G01460.1, AT2G18790.1, AT4G30340.1, AT5G52520.1, AT5G48930.1, AT1G05850.1	0.0019	0.013	Cluster_1
GO:0019222	Biological process	regulation of metabolic process	7	2.64151	AT2G27100.1, AT3G01460.1, AT2G18790.1, AT4G30340.1, AT5G52520.1, AT5G48930.1, AT1G05850.1	0.0042	0.027	Cluster_1
GO:0044255	Biological process	cellular lipid metabolic process	7	2.64151	AT1G67730.1, AT2G18790.1, AT3G24360.1, AT2G07050.1, AT4G35790.1, AT5G23960.1, AT4G11820.2	0.033	0.2	Cluster_1
GO:0009409	Biological process	response to cold	6	2.26415	AT2G18790.1, AT5G58070.1, AT4G24190.1, AT5G12250.1, AT5G04530.1, AT4G35790.1	7e-08	9.8e-07	Cluster_1
GO:0051239	Biological process	regulation of multicellular organismal process	6	2.26415	AT5G08370.1, AT2G18790.1, AT4G24190.1, AT5G16260.1, AT4G31820.1, AT3G19980.1	7.6e-07	9.1e-06	Cluster_1
GO:0055086	Biological process	nucleobase, nucleoside and nucleotide metabolic process	6	2.26415	AT4G01850.1, AT3G42050.1, AT2G36880.1, AT5G03300.1, AT3G28715.1, AT1G02500.1	9.6e-07	1.1e-05	Cluster_1
GO:0050793	Biological process	regulation of developmental process	6	2.26415	AT5G08370.1, AT2G18790.1, AT4G24190.1, AT5G16260.1, AT4G31820.1, AT3G19980.1	7.2e-06	7.2e-05	Cluster_1
GO:0009908	Biological process	flower development	6	2.26415	AT5G08370.1, AT5G52520.1, AT5G16260.1, AT4G31820.1, AT3G28860.1, AT3G19980.1	1.9e-05	0.00018	Cluster_1
GO:0007017	Biological process	microtubule-based process	6	2.26415	AT5G12250.1, AT5G23860.1, AT1G50010.1, AT5G19780.1, AT4G14960.2, AT5G49720.1	5.2e-05	0.00045	Cluster_1
GO:0006412	Biological process	translation	6	2.26415	AT1G02780.1, AT3G13920.2, AT5G52520.1, AT5G59240.1, AT4G18100.1, AT5G60390.1	0.00039	0.003	Cluster_1
GO:0009056	Biological process	catabolic process	6	2.26415	AT3G24360.1, AT1G53750.1, AT5G16260.1, AT5G58290.1, AT1G12000.1, AT5G64570.1	0.0014	0.01	Cluster_1
GO:0006812	Biological process	cation transport	6	2.26415	AT1G04690.1, AT1G78900.1, AT3G42050.1, AT1G15520.1, AT3G45780.1, AT3G28715.1	0.013	0.08	Cluster_1
GO:0006811	Biological process	ion transport	6	2.26415	AT1G04690.1, AT1G78900.1, AT3G42050.1, AT1G15520.1, AT3G45780.1, AT3G28715.1	0.027	0.16	Cluster_1
GO:0005976	Biological process	polysaccharide metabolic process	5	1.88679	AT4G39210.1, AT5G64570.1, AT4G32410.1, AT4G37800.1, AT5G49720.1	5.8e-07	7.1e-06	Cluster_1
GO:0048580	Biological process	regulation of post-embryonic development	5	1.88679	AT3G19980.1, AT4G31820.1, AT5G08370.1, AT5G16260.1, AT2G18790.1	3.6e-06	4.1e-05	Cluster_1
GO:0009699	Biological process	phenylpropanoid biosynthetic process	5	1.88679	AT5G48930.1, AT5G07990.1, AT1G05850.1, AT4G27430.1, AT3G51240.1	4.1e-06	4.4e-05	Cluster_1
GO:0009309	Biological process	amine biosynthetic process	5	1.88679	AT4G01850.1, AT3G03780.1, AT1G23820.1, AT1G02500.1, AT2G36880.1	4.1e-06	4.4e-05	Cluster_1
GO:0007010	Biological process	cytoskeleton organization	5	1.88679	AT5G09810.1, AT2G19770.1, AT4G14960.2, AT2G41740.1, AT5G49720.1	4.1e-06	4.4e-05	Cluster_1
GO:0009698	Biological process	phenylpropanoid metabolic process	5	1.88679	AT5G48930.1, AT5G07990.1, AT1G05850.1, AT4G27430.1, AT3G51240.1	6.9e-06	7.1e-05	Cluster_1
GO:0022621	Biological process	shoot system development	5	1.88679	AT2G27100.1, AT4G30340.1, AT4G31820.1, AT5G08370.1, AT3G01460.1	1.6e-05	0.00016	Cluster_1
GO:0048367	Biological process	shoot development	5	1.88679	AT2G27100.1, AT4G30340.1, AT4G31820.1, AT5G08370.1, AT3G01460.1	1.6e-05	0.00016	Cluster_1
GO:0019438	Biological process	aromatic compound biosynthetic process	5	1.88679	AT5G48930.1, AT5G07990.1, AT1G05850.1, AT4G27430.1, AT3G51240.1	2.6e-05	0.00024	Cluster_1
GO:0048229	Biological process	gametophyte development	5	1.88679	AT1G71830.1, AT2G07050.1, AT1G78900.1, AT5G52520.1, AT5G17020.1	3.1e-05	0.00028	Cluster_1
GO:0016053	Biological process	organic acid biosynthetic process	5	1.88679	AT4G01850.1, AT3G03780.1, AT1G67730.1, AT1G02500.1, AT2G36880.1	5.1e-05	0.00045	Cluster_1
GO:0046394	Biological process	carboxylic acid biosynthetic process	5	1.88679	AT4G01850.1, AT3G03780.1, AT1G67730.1, AT1G02500.1, AT2G36880.1	5.1e-05	0.00045	Cluster_1
GO:0070887	Biological process	cellular response to chemical stimulus	5	1.88679	AT1G71830.1, AT2G27100.1, AT2G19860.1, AT2G36830.1, AT2G18790.1	6.8e-05	0.00059	Cluster_1
GO:0009605	Biological process	response to external stimulus	5	1.88679	AT5G09810.1, AT3G28860.1, AT1G23010.1, AT3G45780.1, AT2G18790.1	8.4e-05	0.00071	Cluster_1
GO:0006952	Biological process	defense response	5	1.88679	AT3G43300.1, AT1G33590.1, AT2G18790.1, AT5G64440.1, AT1G10920.1	0.00024	0.0019	Cluster_1
GO:0008610	Biological process	lipid biosynthetic process	5	1.88679	AT1G67730.1, AT5G23960.1, AT2G07050.1, AT3G19820.1, AT4G11820.2	0.00043	0.0033	Cluster_1
GO:0015672	Biological process	monovalent inorganic cation transport	5	1.88679	AT3G28715.1, AT1G04690.1, AT3G42050.1, AT1G78900.1, AT3G45780.1	0.00045	0.0034	Cluster_1
GO:0051707	Biological process	response to other organism	5	1.88679	AT4G13350.1, AT3G43300.1, AT5G64440.1, AT3G60240.4, AT1G10920.1	0.00047	0.0035	Cluster_1
GO:0006464	Biological process	protein modification process	5	1.88679	AT1G71830.1, AT1G05170.2, AT3G45780.1, AT1G48480.1, AT2G24360.1	0.0027	0.018	Cluster_1
GO:0043412	Biological process	macromolecule modification	5	1.88679	AT1G71830.1, AT1G05170.2, AT3G45780.1, AT1G48480.1, AT2G24360.1	0.0066	0.043	Cluster_1
GO:0016070	Biological process	RNA metabolic process	5	1.88679	AT2G27100.1, AT3G01460.1, AT5G52520.1, AT5G16260.1, AT2G18790.1	0.018	0.11	Cluster_1
GO:0003824	Molecular function	catalytic activity	101	38.1132	AT4G35160.1, AT3G13920.2, AT3G46440.1, AT1G48480.1, AT4G30810.1, AT1G05850.1, AT3G08510.1, AT1G52570.1, AT3G51240.1, AT1G43710.1, AT1G59610.1, AT2G27210.1, AT1G05170.2, AT3G56460.1, AT1G71830.1, AT2G07050.1, AT1G25510.1, AT3G03780.1, AT5G49720.1, AT5G51070.1, AT5G18170.1, AT1G08470.1, AT3G26780.1, AT3G28715.1, AT5G07990.1, AT2G24360.1, AT1G03495.1, AT1G04980.1, AT2G19860.1, AT1G75680.1, AT5G64350…	5.2e-15	4.9e-13	Cluster_1
GO:0016787	Molecular function	hydrolase activity	39	14.717	AT1G08420.1, AT3G13920.2, AT3G28860.1, AT1G75680.1, AT1G29660.1, AT1G07670.1, AT5G58290.1, AT5G64440.1, AT4G30810.1, AT1G05850.1, AT3G08510.1, AT5G08370.1, AT1G52570.1, AT4G13350.1, AT5G06600.1, AT3G42050.1, AT5G53370.1, AT1G15520.1, AT1G53750.1, AT3G05910.1, AT1G12240.1, AT1G59610.1, AT2G27210.1, AT4G34980.1, AT4G34880.1, AT2G16430.2, AT3G24360.1, AT1G25510.1, AT3G28715.1, AT2G24520.1, AT4G37800…	3.8e-06	8.4e-05	Cluster_1
GO:0016740	Molecular function	transferase activity	37	13.9623	AT2G24360.1, AT1G03495.1, AT5G26780.3, AT1G48480.1, AT2G19860.1, AT2G36880.1, AT4G13930.1, AT4G30340.1, AT3G43190.1, AT4G35160.1, AT2G30970.1, AT4G39210.1, AT5G04530.1, AT1G05170.2, AT5G58730.1, AT3G57650.1, AT4G01850.1, AT2G18790.1, AT4G37800.1, AT1G74910.1, AT3G03780.1, AT4G32410.1, AT3G45780.1, AT5G49460.1, AT1G73370.1, AT1G31070.2, AT5G48930.1, AT1G71830.1, AT5G13420.1, AT1G09430.1, AT1G23820…	5e-19	7.1e-17	Cluster_1
GO:0005515	Molecular function	protein binding	26	9.81132	AT2G41740.1, AT3G43300.1, AT3G11130.1, AT1G31730.1, AT1G08190.1, AT4G35160.1, AT5G62390.1, AT1G19870.1, AT4G25550.1, AT5G60390.1, AT2G20760.1, AT3G45780.1, AT1G33590.1, AT3G12050.1, AT3G18190.1, AT5G05010.1, AT3G19820.1, AT2G44610.1, AT4G31480.1, AT4G34450.1, AT2G19770.1, AT1G62020.1, AT3G19980.1, AT5G22780.1, AT1G10630.1, AT5G17020.1	8.4e-10	4e-08	Cluster_1
GO:0005215	Molecular function	transporter activity	20	7.54717	AT1G04690.1, AT1G72160.1, AT2G36830.1, AT5G58070.1, AT1G52190.1, AT3G28860.1, AT3G42050.1, AT1G62020.1, AT1G15520.1, AT4G00430.1, AT3G46450.2, AT2G16850.1, AT1G78900.1, AT2G16950.1, AT1G07670.1, AT3G28715.1, AT5G22780.1, AT5G17020.1, AT4G35100.1, AT4G35300.1	5.4e-12	3.9e-10	Cluster_1
GO:0000166	Molecular function	nucleotide binding	20	7.54717	AT3G01460.1, AT1G78900.1, AT5G15490.1, AT1G08190.1, AT4G13350.1, AT3G18190.1, AT1G60650.1, AT1G48480.1, AT2G19860.1, AT5G52520.1, AT3G03890.1, AT4G20840.1, AT2G27600.1, AT3G45780.1, AT4G24190.1, AT5G51070.1, AT2G44610.1, AT4G17530.1, AT4G14300.1, AT1G10630.1	0.016	0.1	Cluster_1
GO:0005198	Molecular function	structural molecule activity	16	6.03774	AT4G31480.1, AT1G50010.1, AT4G18100.1, AT5G59240.1, AT2G20760.1, AT5G23860.1, AT1G75780.1, AT1G62020.1, AT5G62700.1, AT5G19780.1, AT5G09810.1, AT4G14960.2, AT3G11130.1, AT4G34450.1, AT1G02780.1, AT5G12250.1	5.7e-20	1.6e-17	Cluster_1
GO:0016772	Molecular function	transferase activity, transferring phosphorus-containing groups	14	5.28302	AT1G71830.1, AT2G18790.1, AT4G30340.1, AT2G24360.1, AT5G58730.1, AT1G48480.1, AT2G19860.1, AT1G74910.1, AT5G03300.1, AT3G45780.1, AT3G19980.1, AT1G31070.2, AT4G39210.1, AT1G12000.1	1.7e-06	4.3e-05	Cluster_1
GO:0022892	Molecular function	substrate-specific transporter activity	14	5.28302	AT1G04690.1, AT1G78900.1, AT2G36830.1, AT3G42050.1, AT3G28860.1, AT4G00430.1, AT2G16850.1, AT2G16950.1, AT1G07670.1, AT3G28715.1, AT5G22780.1, AT5G17020.1, AT4G35100.1, AT4G35300.1	0.0015	0.013	Cluster_1
GO:0016491	Molecular function	oxidoreductase activity	13	4.90566	AT5G18170.1, AT1G67730.1, AT5G15490.1, AT5G07990.1, AT3G51240.1, AT2G16530.1, AT5G50850.1, AT1G23010.1, AT4G20840.1, AT1G63000.1, AT2G38080.1, AT1G12520.1, AT3G56460.1	7.6e-05	0.0009	Cluster_1
GO:0017111	Molecular function	nucleoside-triphosphatase activity	13	4.90566	AT3G19960.2, AT3G13920.2, AT4G13350.1, AT3G42050.1, AT3G28860.1, AT1G15520.1, AT1G53750.1, AT2G24520.1, AT1G59610.1, AT1G07670.1, AT3G28715.1, AT5G58290.1, AT5G51070.1	0.00047	0.0045	Cluster_1
GO:0016462	Molecular function	pyrophosphatase activity	13	4.90566	AT3G19960.2, AT3G13920.2, AT4G13350.1, AT3G42050.1, AT3G28860.1, AT1G15520.1, AT1G53750.1, AT2G24520.1, AT1G59610.1, AT1G07670.1, AT3G28715.1, AT5G58290.1, AT5G51070.1	0.00068	0.0063	Cluster_1
GO:0016818	Molecular function	hydrolase activity, acting on acid anhydrides, in phosphorus-containing anhydrides	13	4.90566	AT3G19960.2, AT3G13920.2, AT4G13350.1, AT3G42050.1, AT3G28860.1, AT1G15520.1, AT1G53750.1, AT2G24520.1, AT1G59610.1, AT1G07670.1, AT3G28715.1, AT5G58290.1, AT5G51070.1	0.00071	0.0063	Cluster_1
GO:0016817	Molecular function	hydrolase activity, acting on acid anhydrides	13	4.90566	AT3G19960.2, AT3G13920.2, AT4G13350.1, AT3G42050.1, AT3G28860.1, AT1G15520.1, AT1G53750.1, AT2G24520.1, AT1G59610.1, AT1G07670.1, AT3G28715.1, AT5G58290.1, AT5G51070.1	0.00073	0.0063	Cluster_1
GO:0017076	Molecular function	purine nucleotide binding	13	4.90566	AT1G78900.1, AT4G13350.1, AT3G18190.1, AT1G48480.1, AT2G19860.1, AT5G52520.1, AT4G24190.1, AT4G20840.1, AT2G27600.1, AT5G51070.1, AT2G44610.1, AT4G17530.1, AT1G10630.1	0.0027	0.022	Cluster_1
GO:0032555	Molecular function	purine ribonucleotide binding	12	4.5283	AT1G78900.1, AT4G13350.1, AT3G18190.1, AT1G48480.1, AT2G19860.1, AT5G52520.1, AT4G24190.1, AT2G27600.1, AT5G51070.1, AT2G44610.1, AT4G17530.1, AT1G10630.1	0.0072	0.053	Cluster_1
GO:0032553	Molecular function	ribonucleotide binding	12	4.5283	AT1G78900.1, AT4G13350.1, AT3G18190.1, AT1G48480.1, AT2G19860.1, AT5G52520.1, AT4G24190.1, AT2G27600.1, AT5G51070.1, AT2G44610.1, AT4G17530.1, AT1G10630.1	0.0072	0.053	Cluster_1
GO:0022857	Molecular function	transmembrane transporter activity	12	4.5283	AT1G04690.1, AT1G78900.1, AT2G36830.1, AT3G42050.1, AT3G28860.1, AT1G15520.1, AT4G00430.1, AT2G16850.1, AT1G07670.1, AT3G28715.1, AT4G35100.1, AT4G35300.1	0.018	0.11	Cluster_1
GO:0016788	Molecular function	hydrolase activity, acting on ester bonds	12	4.5283	AT3G08510.1, AT1G08420.1, AT4G16820.1, AT1G52570.1, AT2G16430.2, AT3G24360.1, AT5G53370.1, AT3G05910.1, AT3G19980.1, AT1G29660.1, AT2G27210.1, AT4G35790.1	0.02	0.12	Cluster_1
GO:0016301	Molecular function	kinase activity	11	4.15094	AT1G71830.1, AT2G18790.1, AT4G30340.1, AT2G24360.1, AT5G58730.1, AT1G48480.1, AT2G19860.1, AT5G03300.1, AT3G45780.1, AT3G19980.1, AT1G12000.1	9.9e-05	0.0011	Cluster_1
GO:0022891	Molecular function	substrate-specific transmembrane transporter activity	11	4.15094	AT1G04690.1, AT1G78900.1, AT2G36830.1, AT3G42050.1, AT3G28860.1, AT4G00430.1, AT2G16850.1, AT1G07670.1, AT3G28715.1, AT4G35100.1, AT4G35300.1	0.0089	0.061	Cluster_1
GO:0016887	Molecular function	ATPase activity	10	3.77358	AT3G13920.2, AT3G42050.1, AT3G28860.1, AT1G15520.1, AT1G53750.1, AT2G24520.1, AT1G07670.1, AT3G28715.1, AT5G58290.1, AT5G51070.1	2.8e-10	1.6e-08	Cluster_1
GO:0046872	Molecular function	metal ion binding	9	3.39623	AT1G08450.1, AT1G08190.1, AT5G08580.1, AT4G26470.1, AT1G60650.1, AT1G23010.1, AT1G53210.1, AT1G12520.1, AT3G56460.1	0.00016	0.0017	Cluster_1
GO:0043169	Molecular function	cation binding	9	3.39623	AT1G08450.1, AT1G08190.1, AT5G08580.1, AT4G26470.1, AT1G60650.1, AT1G23010.1, AT1G53210.1, AT1G12520.1, AT3G56460.1	0.0002	0.002	Cluster_1
GO:0043167	Molecular function	ion binding	9	3.39623	AT1G08450.1, AT1G08190.1, AT5G08580.1, AT4G26470.1, AT1G60650.1, AT1G23010.1, AT1G53210.1, AT1G12520.1, AT3G56460.1	0.0002	0.002	Cluster_1
GO:0030554	Molecular function	adenyl nucleotide binding	9	3.39623	AT1G78900.1, AT4G24190.1, AT1G48480.1, AT2G19860.1, AT5G52520.1, AT4G20840.1, AT2G27600.1, AT5G51070.1, AT3G18190.1	0.024	0.14	Cluster_1
GO:0001883	Molecular function	purine nucleoside binding	9	3.39623	AT1G78900.1, AT4G24190.1, AT1G48480.1, AT2G19860.1, AT5G52520.1, AT4G20840.1, AT2G27600.1, AT5G51070.1, AT3G18190.1	0.024	0.14	Cluster_1
GO:0001882	Molecular function	nucleoside binding	9	3.39623	AT1G78900.1, AT4G24190.1, AT1G48480.1, AT2G19860.1, AT5G52520.1, AT4G20840.1, AT2G27600.1, AT5G51070.1, AT3G18190.1	0.024	0.14	Cluster_1
GO:0004553	Molecular function	hydrolase activity, hydrolyzing O-glycosyl compounds	8	3.01887	AT5G08370.1, AT1G12240.1, AT4G37800.1, AT1G75680.1, AT4G36360.1, AT5G49720.1, AT1G05850.1, AT5G64570.1	0.0045	0.035	Cluster_1
GO:0016798	Molecular function	hydrolase activity, acting on glycosyl bonds	8	3.01887	AT5G08370.1, AT1G12240.1, AT4G37800.1, AT1G75680.1, AT4G36360.1, AT5G49720.1, AT1G05850.1, AT5G64570.1	0.0081	0.058	Cluster_1
GO:0016853	Molecular function	isomerase activity	7	2.64151	AT2G07050.1, AT2G16600.1, AT1G04980.1, AT1G63000.1, AT5G64350.1, AT4G33060.1, AT1G30620.1	1.4e-06	4e-05	Cluster_1
GO:0016746	Molecular function	transferase activity, transferring acyl groups	7	2.64151	AT1G03495.1, AT1G09430.1, AT5G04530.1, AT5G49460.1, AT5G48930.1, AT3G57650.1, AT4G11820.2	0.0017	0.014	Cluster_1
GO:0042578	Molecular function	phosphoric ester hydrolase activity	7	2.64151	AT3G08510.1, AT1G52570.1, AT2G16430.2, AT1G08420.1, AT3G19980.1, AT4G35790.1, AT2G27210.1	0.0088	0.061	Cluster_1
GO:0042623	Molecular function	ATPase activity, coupled	6	2.26415	AT3G13920.2, AT3G42050.1, AT1G07670.1, AT1G15520.1, AT3G28860.1, AT3G28715.1	3e-06	7.2e-05	Cluster_1
GO:0060089	Molecular function	molecular transducer activity	6	2.26415	AT1G71830.1, AT2G18790.1, AT4G33270.1, AT4G31820.1, AT3G45780.1, AT5G17020.1	3.5e-05	0.0005	Cluster_1
GO:0004871	Molecular function	signal transducer activity	6	2.26415	AT1G71830.1, AT2G18790.1, AT4G33270.1, AT4G31820.1, AT3G45780.1, AT5G17020.1	3.5e-05	0.0005	Cluster_1
GO:0008324	Molecular function	cation transmembrane transporter activity	6	2.26415	AT1G04690.1, AT1G78900.1, AT3G42050.1, AT1G07670.1, AT3G28715.1, AT4G35300.1	0.045	0.26	Cluster_1
GO:0022803	Molecular function	passive transmembrane transporter activity	5	1.88679	AT1G04690.1, AT2G16850.1, AT4G00430.1, AT2G36830.1, AT4G35100.1	5.8e-07	1.8e-05	Cluster_1
GO:0015267	Molecular function	channel activity	5	1.88679	AT1G04690.1, AT2G16850.1, AT4G00430.1, AT2G36830.1, AT4G35100.1	5.8e-07	1.8e-05	Cluster_1
GO:0022838	Molecular function	substrate-specific channel activity	5	1.88679	AT1G04690.1, AT2G16850.1, AT4G00430.1, AT2G36830.1, AT4G35100.1	5.8e-07	1.8e-05	Cluster_1
GO:0042626	Molecular function	ATPase activity, coupled to transmembrane movement of substances	5	1.88679	AT3G28715.1, AT3G42050.1, AT3G28860.1, AT1G15520.1, AT1G07670.1	9.7e-06	0.00017	Cluster_1
GO:0016820	Molecular function	hydrolase activity, acting on acid anhydrides, catalyzing transmembrane movement of substances	5	1.88679	AT3G28715.1, AT3G42050.1, AT3G28860.1, AT1G15520.1, AT1G07670.1	9.7e-06	0.00017	Cluster_1
GO:0043492	Molecular function	ATPase activity, coupled to movement of substances	5	1.88679	AT3G28715.1, AT3G42050.1, AT3G28860.1, AT1G15520.1, AT1G07670.1	9.7e-06	0.00017	Cluster_1
GO:0015405	Molecular function	P-P-bond-hydrolysis-driven transmembrane transporter activity	5	1.88679	AT3G28715.1, AT3G42050.1, AT3G28860.1, AT1G15520.1, AT1G07670.1	1.3e-05	0.00021	Cluster_1
GO:0015399	Molecular function	primary active transmembrane transporter activity	5	1.88679	AT3G28715.1, AT3G42050.1, AT3G28860.1, AT1G15520.1, AT1G07670.1	1.3e-05	0.00021	Cluster_1
GO:0016758	Molecular function	transferase activity, transferring hexosyl groups	5	1.88679	AT1G05170.2, AT3G43190.1, AT4G32410.1, AT4G37800.1, AT1G73370.1	4e-05	0.00055	Cluster_1
GO:0008168	Molecular function	methyltransferase activity	5	1.88679	AT5G26780.3, AT3G03780.1, AT1G73600.2, AT4G35160.1, AT4G13930.1	5.1e-05	0.00066	Cluster_1
GO:0016741	Molecular function	transferase activity, transferring one-carbon groups	5	1.88679	AT5G26780.3, AT3G03780.1, AT1G73600.2, AT4G35160.1, AT4G13930.1	5.5e-05	0.00068	Cluster_1
GO:0016829	Molecular function	lyase activity	5	1.88679	AT1G43710.1, AT3G46440.1, AT5G23960.1, AT1G08200.1, AT1G08470.1	0.00024	0.0023	Cluster_1
GO:0046914	Molecular function	transition metal ion binding	5	1.88679	AT1G60650.1, AT1G08190.1, AT1G23010.1, AT3G56460.1, AT1G12520.1	0.0091	0.061	Cluster_1
GO:0016747	Molecular function	transferase activity, transferring acyl groups other than amino-acyl groups	5	1.88679	AT5G04530.1, AT1G03495.1, AT5G48930.1, AT3G57650.1, AT4G11820.2	0.018	0.12	Cluster_1
GO:0044464	Cellular component	cell part	128	48.3019	AT4G27430.1, AT3G13920.2, AT4G33270.1, AT3G11130.1, AT5G58000.1, AT3G19960.2, AT1G31730.1, AT2G44060.1, AT4G14960.2, AT5G62390.1, AT4G31820.1, AT2G27210.1, AT1G05170.2, AT1G19870.1, AT3G56460.1, AT1G71830.1, AT4G18100.1, AT2G36830.1, AT5G08580.1, AT1G25510.1, AT3G03780.1, AT5G49720.1, AT5G51070.1, AT5G05010.1, AT5G18170.1, AT1G72160.1, AT1G08470.1, AT4G08950.1, AT3G26780.1, AT3G28715.1, AT2G19770…	4e-36	3.6e-34	Cluster_1
GO:0005623	Cellular component	cell	128	48.3019	AT4G27430.1, AT3G13920.2, AT4G33270.1, AT3G11130.1, AT5G58000.1, AT3G19960.2, AT1G31730.1, AT2G44060.1, AT4G14960.2, AT5G62390.1, AT4G31820.1, AT2G27210.1, AT1G05170.2, AT1G19870.1, AT3G56460.1, AT1G71830.1, AT4G18100.1, AT2G36830.1, AT5G08580.1, AT1G25510.1, AT3G03780.1, AT5G49720.1, AT5G51070.1, AT5G05010.1, AT5G18170.1, AT1G72160.1, AT1G08470.1, AT4G08950.1, AT3G26780.1, AT3G28715.1, AT2G19770…	4e-36	3.6e-34	Cluster_1
GO:0044424	Cellular component	intracellular part	92	34.717	AT4G27430.1, AT3G13920.2, AT3G11130.1, AT5G58000.1, AT3G19960.2, AT1G31730.1, AT5G62390.1, AT4G31820.1, AT2G27210.1, AT1G19870.1, AT3G56460.1, AT4G18100.1, AT2G36830.1, AT4G24190.1, AT3G03780.1, AT5G49720.1, AT5G51070.1, AT5G18170.1, AT1G08470.1, AT3G26780.1, AT3G28715.1, AT1G78900.1, AT5G26780.3, AT2G19860.1, AT5G04990.1, AT3G43300.1, AT1G07670.1, AT5G22580.1, AT5G64440.1, AT1G04760.1, AT4G13350…	6.6e-12	1.1e-10	Cluster_1
GO:0005622	Cellular component	intracellular	92	34.717	AT4G27430.1, AT3G13920.2, AT3G11130.1, AT5G58000.1, AT3G19960.2, AT1G31730.1, AT5G62390.1, AT4G31820.1, AT2G27210.1, AT1G19870.1, AT3G56460.1, AT4G18100.1, AT2G36830.1, AT4G24190.1, AT3G03780.1, AT5G49720.1, AT5G51070.1, AT5G18170.1, AT1G08470.1, AT3G26780.1, AT3G28715.1, AT1G78900.1, AT5G26780.3, AT2G19860.1, AT5G04990.1, AT3G43300.1, AT1G07670.1, AT5G22580.1, AT5G64440.1, AT1G04760.1, AT4G13350…	6.5e-11	8.9e-10	Cluster_1
GO:0005737	Cellular component	cytoplasm	82	30.9434	AT3G10380.1, AT1G78900.1, AT1G02780.1, AT4G31480.1, AT3G13920.2, AT2G16530.1, AT1G07670.1, AT5G26780.3, AT2G19860.1, AT2G30970.1, AT5G19780.1, AT5G22580.1, AT1G08200.1, AT3G11130.1, AT4G24190.1, AT1G33590.1, AT5G58000.1, AT5G52520.1, AT5G64440.1, AT4G13930.1, AT1G04760.1, AT3G19960.2, AT1G31730.1, AT5G58070.1, AT3G45780.1, AT5G09810.1, AT4G13350.1, AT3G42050.1, AT4G35160.1, AT3G19980.1, AT1G09430…	1e-14	2.6e-13	Cluster_1
GO:0043229	Cellular component	intracellular organelle	78	29.434	AT1G78900.1, AT1G02780.1, AT4G31480.1, AT4G27430.1, AT2G16530.1, AT5G64350.1, AT5G26780.3, AT2G19860.1, AT2G30970.1, AT5G19780.1, AT5G22580.1, AT5G58070.1, AT1G29660.1, AT3G11130.1, AT4G24190.1, AT1G07670.1, AT5G58000.1, AT5G58290.1, AT5G64440.1, AT1G04760.1, AT3G19960.2, AT5G09810.1, AT3G42050.1, AT5G12250.1, AT3G19980.1, AT5G62390.1, AT4G31820.1, AT2G16950.1, AT4G27450.1, AT5G64430.1, AT1G19870…	4.9e-09	5.2e-08	Cluster_1
GO:0043226	Cellular component	organelle	78	29.434	AT1G78900.1, AT1G02780.1, AT4G31480.1, AT4G27430.1, AT2G16530.1, AT5G64350.1, AT5G26780.3, AT2G19860.1, AT2G30970.1, AT5G19780.1, AT5G22580.1, AT5G58070.1, AT1G29660.1, AT3G11130.1, AT4G24190.1, AT1G07670.1, AT5G58000.1, AT5G58290.1, AT5G64440.1, AT1G04760.1, AT3G19960.2, AT5G09810.1, AT3G42050.1, AT5G12250.1, AT3G19980.1, AT5G62390.1, AT4G31820.1, AT2G16950.1, AT4G27450.1, AT5G64430.1, AT1G19870…	5e-09	5.2e-08	Cluster_1
GO:0044444	Cellular component	cytoplasmic part	76	28.6792	AT3G10380.1, AT1G78900.1, AT1G02780.1, AT4G31480.1, AT3G13920.2, AT2G16530.1, AT1G07670.1, AT5G26780.3, AT2G19860.1, AT2G30970.1, AT5G19780.1, AT5G22580.1, AT5G58070.1, AT3G11130.1, AT4G24190.1, AT1G33590.1, AT5G58000.1, AT5G52520.1, AT5G64440.1, AT4G13930.1, AT1G04760.1, AT3G19960.2, AT1G31730.1, AT5G09810.1, AT4G13350.1, AT3G42050.1, AT4G35160.1, AT3G03890.1, AT1G09430.1, AT5G62390.1, AT4G31820…	2.1e-13	4.5e-12	Cluster_1
GO:0043227	Cellular component	membrane-bounded organelle	69	26.0377	AT1G78900.1, AT4G31480.1, AT4G27430.1, AT2G16530.1, AT5G64350.1, AT5G26780.3, AT2G19860.1, AT2G30970.1, AT5G22580.1, AT5G58070.1, AT1G29660.1, AT3G11130.1, AT4G24190.1, AT1G07670.1, AT5G58000.1, AT5G58290.1, AT5G64440.1, AT1G04760.1, AT5G09810.1, AT3G42050.1, AT3G19980.1, AT5G62390.1, AT4G31820.1, AT2G16950.1, AT4G27450.1, AT5G64430.1, AT1G19870.1, AT3G56460.1, AT5G60390.1, AT2G27100.1, AT1G67730…	6.3e-07	5e-06	Cluster_1
GO:0043231	Cellular component	intracellular membrane-bounded organelle	69	26.0377	AT1G78900.1, AT4G31480.1, AT4G27430.1, AT2G16530.1, AT5G64350.1, AT5G26780.3, AT2G19860.1, AT2G30970.1, AT5G22580.1, AT5G58070.1, AT1G29660.1, AT3G11130.1, AT4G24190.1, AT1G07670.1, AT5G58000.1, AT5G58290.1, AT5G64440.1, AT1G04760.1, AT5G09810.1, AT3G42050.1, AT3G19980.1, AT5G62390.1, AT4G31820.1, AT2G16950.1, AT4G27450.1, AT5G64430.1, AT1G19870.1, AT3G56460.1, AT5G60390.1, AT2G27100.1, AT1G67730…	6e-07	5e-06	Cluster_1
GO:0016020	Cellular component	membrane	43	16.2264	AT1G78900.1, AT4G31480.1, AT2G24360.1, AT4G00430.1, AT4G33270.1, AT2G16850.1, AT3G11130.1, AT3G28860.1, AT5G64440.1, AT1G04760.1, AT1G31730.1, AT2G44060.1, AT5G58070.1, AT1G53210.1, AT3G42050.1, AT1G15520.1, AT4G35100.1, AT3G24360.1, AT1G52190.1, AT1G05170.2, AT3G19820.1, AT5G60390.1, AT2G36830.1, AT5G08580.1, AT2G20760.1, AT4G20840.1, AT3G45780.1, AT4G34450.1, AT5G05010.1, AT4G35300.1, AT1G71830…	2e-05	0.00014	Cluster_1
GO:0044422	Cellular component	organelle part	26	9.81132	AT1G78900.1, AT1G02780.1, AT5G62700.1, AT5G04990.1, AT5G19780.1, AT3G43300.1, AT5G64350.1, AT3G19960.2, AT5G59240.1, AT3G42050.1, AT5G23860.1, AT4G14960.2, AT5G64430.1, AT2G27100.1, AT5G19320.1, AT4G18100.1, AT2G36830.1, AT5G51070.1, AT1G50010.1, AT1G53210.1, AT5G13420.1, AT2G14740.1, AT1G62020.1, AT4G31480.1, AT2G16950.1, AT5G17020.1	1.9e-15	6.6e-14	Cluster_1
GO:0044446	Cellular component	intracellular organelle part	26	9.81132	AT1G78900.1, AT1G02780.1, AT5G62700.1, AT5G04990.1, AT5G19780.1, AT3G43300.1, AT5G64350.1, AT3G19960.2, AT5G59240.1, AT3G42050.1, AT5G23860.1, AT4G14960.2, AT5G64430.1, AT2G27100.1, AT5G19320.1, AT4G18100.1, AT2G36830.1, AT5G51070.1, AT1G50010.1, AT1G53210.1, AT5G13420.1, AT2G14740.1, AT1G62020.1, AT4G31480.1, AT2G16950.1, AT5G17020.1	1.9e-15	6.6e-14	Cluster_1
GO:0005886	Cellular component	plasma membrane	26	9.81132	AT2G24360.1, AT4G33270.1, AT3G11130.1, AT3G28860.1, AT5G64440.1, AT1G04760.1, AT2G44060.1, AT3G42050.1, AT1G15520.1, AT5G60390.1, AT5G08580.1, AT2G20760.1, AT4G20840.1, AT3G45780.1, AT1G53210.1, AT4G35100.1, AT1G71830.1, AT1G72160.1, AT2G14740.1, AT2G01970.1, AT1G62020.1, AT5G58070.1, AT4G35790.1, AT3G28715.1, AT5G22780.1, AT4G27450.1	1.5e-12	2.9e-11	Cluster_1
GO:0032991	Cellular component	macromolecular complex	24	9.0566	AT3G10380.1, AT1G50010.1, AT1G02780.1, AT5G62700.1, AT1G53750.1, AT5G19780.1, AT4G33270.1, AT5G58290.1, AT3G19960.2, AT1G31730.1, AT5G59240.1, AT5G23860.1, AT1G09430.1, AT4G14960.2, AT4G18100.1, AT5G49460.1, AT1G71830.1, AT2G14740.1, AT1G62020.1, AT4G31480.1, AT2G16950.1, AT3G19980.1, AT1G12000.1, AT5G17020.1	2.2e-12	3.8e-11	Cluster_1
GO:0043234	Cellular component	protein complex	21	7.92453	AT1G71830.1, AT2G14740.1, AT5G19780.1, AT1G31730.1, AT4G31480.1, AT3G19960.2, AT5G23860.1, AT1G09430.1, AT1G62020.1, AT3G19980.1, AT5G62700.1, AT1G53750.1, AT3G10380.1, AT4G33270.1, AT4G14960.2, AT2G16950.1, AT5G49460.1, AT5G58290.1, AT1G50010.1, AT1G12000.1, AT5G17020.1	6.4e-15	1.9e-13	Cluster_1
GO:0005634	Cellular component	nucleus	19	7.16981	AT2G27100.1, AT5G19320.1, AT5G15490.1, AT4G27430.1, AT2G18790.1, AT2G19770.1, AT1G53750.1, AT5G16260.1, AT5G04990.1, AT2G16950.1, AT1G29660.1, AT5G58290.1, AT3G19980.1, AT4G18100.1, AT1G19870.1, AT5G60390.1, AT4G27450.1, AT4G35100.1, AT5G17020.1	7.1e-16	4.2e-14	Cluster_1
GO:0005829	Cellular component	cytosol	19	7.16981	AT2G27100.1, AT1G50010.1, AT4G18100.1, AT5G59240.1, AT3G13920.2, AT4G13350.1, AT4G13930.1, AT1G02780.1, AT4G35160.1, AT4G27450.1, AT2G16600.1, AT5G19780.1, AT3G03780.1, AT4G14960.2, AT3G26780.1, AT2G27210.1, AT5G15490.1, AT1G19870.1, AT5G49460.1	9.4e-08	8.8e-07	Cluster_1
GO:0005783	Cellular component	endoplasmic reticulum	13	4.90566	AT1G67730.1, AT5G19320.1, AT5G58070.1, AT1G08470.1, AT2G16530.1, AT1G23010.1, AT5G04990.1, AT5G62390.1, AT4G24190.1, AT1G07670.1, AT5G58000.1, AT5G64440.1, AT3G57650.1	8.7e-07	6.7e-06	Cluster_1
GO:0030312	Cellular component	external encapsulating structure	12	4.5283	AT1G69530.3, AT5G08370.1, AT5G15490.1, AT2G16430.2, AT2G01970.1, AT1G04980.1, AT5G11420.1, AT4G08950.1, AT4G37800.1, AT1G33590.1, AT4G34980.1, AT1G12000.1	8.2e-06	6e-05	Cluster_1
GO:0043232	Cellular component	intracellular non-membrane-bounded organelle	12	4.5283	AT3G19960.2, AT5G12250.1, AT4G18100.1, AT5G59240.1, AT5G23860.1, AT2G19770.1, AT1G50010.1, AT5G62700.1, AT5G19780.1, AT5G09810.1, AT4G14960.2, AT1G02780.1	0.009	0.047	Cluster_1
GO:0043228	Cellular component	non-membrane-bounded organelle	12	4.5283	AT3G19960.2, AT5G12250.1, AT4G18100.1, AT5G59240.1, AT5G23860.1, AT2G19770.1, AT1G50010.1, AT5G62700.1, AT5G19780.1, AT5G09810.1, AT4G14960.2, AT1G02780.1	0.009	0.047	Cluster_1
GO:0005618	Cellular component	cell wall	11	4.15094	AT1G69530.3, AT5G08370.1, AT5G15490.1, AT2G16430.2, AT2G01970.1, AT1G04980.1, AT5G11420.1, AT4G08950.1, AT4G37800.1, AT1G33590.1, AT1G12000.1	3.9e-05	0.00026	Cluster_1
GO:0005739	Cellular component	mitochondrion	11	4.15094	AT5G18170.1, AT5G13420.1, AT4G24190.1, AT5G50850.1, AT5G26780.3, AT2G30970.1, AT2G19860.1, AT5G52520.1, AT5G09810.1, AT3G26780.1, AT5G60390.1	0.00038	0.0021	Cluster_1
GO:0044425	Cellular component	membrane part	10	3.77358	AT1G31730.1, AT4G31480.1, AT2G14740.1, AT2G01970.1, AT1G62020.1, AT4G33270.1, AT2G16950.1, AT3G45780.1, AT5G17020.1, AT3G19820.1	0.00015	0.00091	Cluster_1
GO:0005856	Cellular component	cytoskeleton	9	3.39623	AT3G19960.2, AT5G12250.1, AT4G14960.2, AT5G23860.1, AT2G19770.1, AT1G50010.1, AT5G62700.1, AT5G19780.1, AT5G09810.1	1.5e-11	2.3e-10	Cluster_1
GO:0005773	Cellular component	vacuole	8	3.01887	AT1G78900.1, AT2G36830.1, AT1G12240.1, AT3G42050.1, AT3G11130.1, AT3G28715.1, AT1G53210.1, AT5G60390.1	9.7e-10	1.2e-08	Cluster_1
GO:0005794	Cellular component	Golgi apparatus	8	3.01887	AT2G14740.1, AT4G31480.1, AT2G01970.1, AT1G62020.1, AT3G43300.1, AT4G32410.1, AT5G49720.1, AT1G30620.1	2.1e-09	2.5e-08	Cluster_1
GO:0009505	Cellular component	plant-type cell wall	8	3.01887	AT1G69530.3, AT5G08370.1, AT2G16430.2, AT2G01970.1, AT1G04980.1, AT5G11420.1, AT4G08950.1, AT1G33590.1	0.00014	0.00086	Cluster_1
GO:0044430	Cellular component	cytoskeletal part	6	2.26415	AT3G19960.2, AT5G23860.1, AT1G50010.1, AT5G62700.1, AT5G19780.1, AT4G14960.2	1.7e-07	1.5e-06	Cluster_1
GO:0045298	Cellular component	tubulin complex	5	1.88679	AT5G23860.1, AT5G19780.1, AT1G50010.1, AT5G62700.1, AT4G14960.2	5.7e-08	5.6e-07	Cluster_1
GO:0005768	Cellular component	endosome	5	1.88679	AT1G04760.1, AT3G43300.1, AT4G31820.1, AT2G27600.1, AT5G49720.1	4e-05	0.00026	Cluster_1
GO:0031967	Cellular component	organelle envelope	5	1.88679	AT5G19320.1, AT5G04990.1, AT2G16950.1, AT5G64430.1, AT5G17020.1	0.00026	0.0015	Cluster_1
GO:0031975	Cellular component	envelope	5	1.88679	AT5G19320.1, AT5G04990.1, AT2G16950.1, AT5G64430.1, AT5G17020.1	0.00026	0.0015	Cluster_1
GO:0009987	Biological process	cellular process	411	37.2283	AT1G22870.1, AT1G48480.1, AT4G33270.1, AT2G39940.1, AT3G26720.1, AT1G79940.1, AT3G47470.1, AT5G07990.1, AT5G60600.1, AT3G04790.1, AT3G46740.1, AT4G14210.1, AT3G10670.1, AT3G12780.1, AT5G05000.2, AT4G24190.1, AT2G34430.1, AT5G09510.1, AT5G42650.1, AT5G49650.1, AT5G05010.1, AT4G24820.1, AT2G20690.1, AT1G01710.1, AT1G74970.1, AT2G28000.1, AT2G34480.1, AT3G54890.1, AT1G72820.1, AT5G04140.2, AT1G07110…	2.8e-60	3.5e-58	Cluster_2
GO:0008152	Biological process	metabolic process	406	36.7754	AT1G22870.1, AT1G48480.1, AT2G20690.1, AT2G39940.1, AT3G26720.1, AT1G79940.1, AT3G47470.1, AT5G07990.1, AT5G60600.1, AT3G04790.1, AT4G14210.1, AT3G10670.1, AT3G12780.1, AT4G24190.1, AT2G34430.1, AT5G09510.1, AT5G42650.1, AT4G30020.1, AT5G49650.1, AT4G24820.1, AT1G01710.1, AT1G74970.1, AT5G61410.1, AT2G28000.1, AT2G34480.1, AT3G54890.1, AT5G64570.1, AT5G04140.2, AT5G64860.1, AT1G36160.1, AT1G75330…	1e-69	1.6e-67	Cluster_2
GO:0044237	Biological process	cellular metabolic process	350	31.7029	AT1G22870.1, AT1G48480.1, AT2G20690.1, AT2G39940.1, AT3G26720.1, AT1G79940.1, AT3G47470.1, AT5G07990.1, AT5G60600.1, AT3G04790.1, AT4G14210.1, AT3G10670.1, AT3G12780.1, AT4G24190.1, AT2G34430.1, AT5G09510.1, AT5G42650.1, AT5G49650.1, AT4G24820.1, AT1G01710.1, AT1G74970.1, AT2G28000.1, AT2G34480.1, AT3G54890.1, AT5G04140.2, AT5G64860.1, AT1G36160.1, AT1G75330.1, ATCG00380.1, AT4G11630.1, AT5G56000…	1.4e-61	1.8e-59	Cluster_2
GO:0044238	Biological process	primary metabolic process	306	27.7174	AT1G78680.1, ATCG00120.1, AT5G40950.1, AT3G58660.1, AT5G47700.1, AT2G47940.1, AT2G19480.1, AT3G05590.1, AT1G22870.1, AT1G48480.1, AT1G78630.1, AT2G39940.1, AT3G57050.1, AT5G04130.1, AT5G60160.1, AT3G26720.1, AT1G79940.1, AT4G10320.1, AT4G15560.1, AT1G80160.1, AT3G60770.1, AT2G19940.1, AT5G07990.1, AT2G22780.1, AT2G29560.1, AT5G60600.1, AT3G54660.1, AT3G04790.1, AT5G58140.2, AT3G57290.1, AT4G14210…	6.4e-36	4.2e-34	Cluster_2
GO:0009058	Biological process	biosynthetic process	217	19.6558	AT5G40950.1, AT3G05590.1, AT1G78630.1, AT2G20690.1, AT3G57050.1, AT5G04140.2, AT2G22240.1, AT4G10320.1, AT4G15560.1, AT3G60770.1, AT5G10360.1, AT5G07990.1, AT5G60600.1, AT3G04790.1, AT3G09630.1, AT4G14210.1, AT3G10670.1, AT2G29630.2, AT1G60600.2, AT2G36850.1, AT5G54160.1, AT4G04640.1, AT1G08520.1, AT1G42970.1, AT2G47020.1, AT5G35620.1, AT3G03780.1, AT1G31230.1, AT2G36620.1, AT5G09510.1, AT5G42650…	1.3e-155	2.7e-152	Cluster_2
GO:0044249	Biological process	cellular biosynthetic process	206	18.6594	AT5G40950.1, AT3G05590.1, AT1G78630.1, AT2G20690.1, AT3G57050.1, AT5G04140.2, AT2G22240.1, AT4G10320.1, AT4G15560.1, AT3G60770.1, AT5G10360.1, AT5G07990.1, AT5G60600.1, AT3G09630.1, AT4G14210.1, AT3G10670.1, AT2G29630.2, AT1G60600.2, AT2G36850.1, AT5G54160.1, AT4G04640.1, AT1G08520.1, AT2G47020.1, AT5G35620.1, AT3G03780.1, AT1G31230.1, AT2G36620.1, AT5G09510.1, AT5G42650.1, AT5G22800.1, AT1G06820…	4.6e-150	4.7e-147	Cluster_2
GO:0043170	Biological process	macromolecule metabolic process	205	18.5688	AT1G73100.1, AT5G40950.1, AT2G47940.1, AT2G19480.1, AT3G05590.1, AT1G22870.1, AT1G48480.1, AT1G78630.1, AT2G39940.1, AT5G04130.1, AT5G60160.1, AT1G79940.1, AT3G60770.1, AT5G10360.1, AT2G29560.1, AT5G58140.2, AT3G57290.1, AT1G75690.1, AT3G12780.1, AT5G42240.1, AT2G36850.1, AT3G25920.1, AT1G68560.1, AT4G24190.1, AT1G42970.1, AT2G47020.1, AT1G25510.1, AT5G23740.1, AT2G36620.1, AT5G09510.1, AT2G27040…	7.5e-130	3.8e-127	Cluster_2
GO:0044260	Biological process	cellular macromolecule metabolic process	179	16.2138	AT5G40950.1, AT2G47940.1, AT2G19480.1, AT3G05590.1, AT1G22870.1, AT1G48480.1, AT1G78630.1, AT2G39940.1, AT5G04130.1, AT1G79940.1, AT3G60770.1, AT5G10360.1, AT2G29560.1, AT5G58140.2, AT3G57290.1, AT1G75690.1, AT3G12780.1, AT2G36850.1, AT3G25920.1, AT4G24190.1, AT1G42970.1, AT2G47020.1, AT5G23740.1, AT2G36620.1, AT5G09510.1, AT5G22800.1, AT3G11510.1, ATCG00810.1, AT2G37090.1, AT5G55220.1, AT4G24820…	6.3e-110	2.1e-107	Cluster_2
GO:0019538	Biological process	protein metabolic process	158	14.3116	AT5G40950.1, AT2G47940.1, AT3G05590.1, AT1G22870.1, AT1G48480.1, AT1G78630.1, AT2G39940.1, AT5G60160.1, AT1G79940.1, AT3G60770.1, AT5G10360.1, AT5G58140.2, AT3G57290.1, AT1G75690.1, AT5G42240.1, AT3G25920.1, AT4G24190.1, AT2G47020.1, AT1G25510.1, AT5G23740.1, AT2G36620.1, AT5G09510.1, AT4G30020.1, AT3G11510.1, ATCG00810.1, AT5G55220.1, AT4G24820.1, ATCG00780.1, AT3G04600.1, AT4G16720.1, AT3G04400…	1e-137	7e-135	Cluster_2
GO:0050896	Biological process	response to stimulus	139	12.5906	AT2G19480.1, AT3G15360.1, AT2G39940.1, AT5G04140.2, AT5G60160.1, AT2G22240.1, AT1G14210.1, AT2G19940.1, AT5G07990.1, AT2G02560.1, AT4G01050.1, AT5G60600.1, AT3G04790.1, AT3G57290.1, AT2G47450.1, AT4G31820.1, AT3G12780.1, AT1G56340.1, AT2G45290.1, AT1G76100.1, AT1G76570.1, AT5G06290.1, AT2G36830.1, AT3G48990.1, AT4G24190.1, AT1G42970.1, AT5G62640.3, AT2G41680.1, AT4G10340.1, AT5G49910.1, AT5G42650…	2e-66	2.9e-64	Cluster_2
GO:0044267	Biological process	cellular protein metabolic process	138	12.5	AT5G40950.1, AT2G47940.1, AT3G05590.1, AT1G22870.1, AT1G48480.1, AT1G78630.1, AT2G39940.1, AT1G79940.1, AT3G60770.1, AT5G10360.1, AT5G58140.2, AT3G57290.1, AT1G75690.1, AT3G25920.1, AT4G24190.1, AT2G47020.1, AT5G23740.1, AT2G36620.1, AT5G09510.1, AT5G22800.1, AT3G11510.1, ATCG00810.1, AT5G55220.1, AT4G24820.1, ATCG00780.1, AT3G04600.1, AT4G16720.1, AT3G04400.1, AT5G64050.1, AT1G74970.1, ATCG00750…	5.7e-118	2.3e-115	Cluster_2
GO:0006807	Biological process	nitrogen compound metabolic process	125	11.3225	AT1G78680.1, ATCG00120.1, AT2G19480.1, AT2G20690.1, AT3G57050.1, AT5G04130.1, AT4G15560.1, AT2G19940.1, AT1G43710.1, AT3G57290.1, AT5G35630.1, AT4G04640.1, AT3G53900.2, AT1G08520.1, AT3G03780.1, AT1G31230.1, AT5G22800.1, AT5G66120.2, AT3G02060.1, AT3G04600.1, AT2G43750.1, AT5G64050.1, AT5G54190.1, AT5G54810.1, AT1G80560.1, AT4G26900.1, AT1G22410.1, AT1G14650.1, AT2G29690.1, AT1G11870.2, AT5G09250…	9.3e-70	1.6e-67	Cluster_2
GO:0010467	Biological process	gene expression	117	10.5978	AT1G73100.1, AT5G40950.1, AT3G05590.1, AT5G52520.1, AT3G60770.1, AT5G10360.1, AT3G57290.1, AT3G25920.1, AT2G47020.1, AT5G23740.1, AT2G36620.1, AT5G09510.1, AT5G22800.1, AT3G11510.1, ATCG00810.1, ATCG00780.1, AT3G04600.1, AT4G16720.1, AT3G04400.1, AT5G64050.1, AT1G74970.1, ATCG00750.1, ATCG01310.1, AT1G64880.1, AT2G34480.1, AT4G29190.1, AT1G45332.1, AT1G14650.1, AT4G39280.1, AT1G11870.2, AT5G09250…	1e-70	2.1e-68	Cluster_2
GO:0009059	Biological process	macromolecule biosynthetic process	111	10.0543	AT5G40950.1, AT3G05590.1, AT5G52520.1, AT3G60770.1, AT5G10360.1, AT3G57290.1, AT2G36850.1, AT3G25920.1, AT2G47020.1, AT5G23740.1, AT2G36620.1, AT5G09510.1, AT5G22800.1, AT3G11510.1, ATCG00810.1, AT2G37090.1, ATCG00780.1, AT3G04600.1, AT4G16720.1, AT3G04400.1, AT5G64050.1, AT1G74970.1, ATCG00750.1, ATCG01310.1, AT1G64880.1, AT2G34480.1, AT4G29190.1, AT1G45332.1, AT4G39280.1, AT1G11870.2, AT5G09250…	1.2e-71	2.7e-69	Cluster_2
GO:0034645	Biological process	cellular macromolecule biosynthetic process	109	9.87319	AT5G40950.1, AT3G05590.1, AT5G52520.1, AT3G60770.1, AT5G10360.1, AT3G57290.1, AT2G36850.1, AT3G25920.1, AT2G47020.1, AT5G23740.1, AT2G36620.1, AT5G09510.1, AT2G27040.1, AT3G11510.1, ATCG00810.1, AT2G37090.1, ATCG00780.1, AT3G04600.1, AT4G16720.1, AT3G04400.1, AT5G64050.1, AT1G74970.1, ATCG00750.1, ATCG01310.1, AT1G64880.1, AT2G34480.1, AT4G29190.1, AT1G45332.1, AT4G39280.1, AT1G11870.2, AT5G09250…	7.3e-70	1.4e-67	Cluster_2
GO:0006412	Biological process	translation	92	8.33333	AT5G40950.1, AT3G05590.1, AT5G52520.1, AT3G60770.1, AT5G10360.1, AT3G57290.1, AT2G47020.1, AT5G23740.1, AT2G36620.1, AT5G09510.1, AT5G22800.1, AT3G11510.1, ATCG00810.1, ATCG00780.1, AT3G04600.1, AT4G16720.1, AT3G04400.1, AT5G64050.1, AT1G74970.1, ATCG00750.1, ATCG01310.1, AT1G64880.1, AT2G34480.1, AT2G42740.1, AT1G45332.1, AT4G39280.1, AT1G11870.2, AT5G39850.1, AT4G29060.1, AT5G04800.1, ATCG00380…	7.1e-92	2.1e-89	Cluster_2
GO:0006950	Biological process	response to stress	89	8.06159	AT2G19480.1, AT3G15360.1, AT2G39940.1, AT2G22240.1, AT1G14210.1, AT4G16760.1, AT4G01050.1, AT5G60600.1, AT3G04790.1, AT3G12780.1, AT1G56340.1, AT5G06290.1, AT4G24190.1, AT1G42970.1, AT2G41680.1, AT5G49910.1, AT5G42650.1, AT3G47520.1, AT1G67090.1, AT2G02990.1, AT5G11150.1, AT5G61410.1, AT1G55020.1, AT5G20720.1, AT5G54810.1, AT1G15690.1, AT1G53240.1, AT1G04980.1, AT4G09650.1, AT3G26650.1, AT3G47860…	3.3e-52	3.4e-50	Cluster_2
GO:0042180	Biological process	cellular ketone metabolic process	84	7.6087	ATCG00500.1, AT1G78680.1, AT1G62640.1, AT1G68530.1, AT1G60600.2, AT4G32520.1, AT4G26900.1, AT1G22410.1, AT5G67030.1, AT1G29900.1, AT1G74040.1, AT1G55020.1, AT5G26830.1, AT4G33010.1, AT1G36160.1, AT3G57050.1, AT3G02660.1, AT1G80560.1, AT1G05010.1, AT1G01610.1, AT3G16950.2, AT1G75330.1, AT1G29880.1, AT4G15560.1, AT3G03710.1, AT2G30200.1, AT3G13490.1, AT2G44160.1, AT4G16760.1, AT4G12130.1, AT1G43710…	9.6e-37	7.2e-35	Cluster_2
GO:0043436	Biological process	oxoacid metabolic process	83	7.51812	ATCG00500.1, AT1G78680.1, AT1G62640.1, AT1G68530.1, AT4G32520.1, AT4G26900.1, AT1G22410.1, AT5G67030.1, AT1G29900.1, AT1G74040.1, AT1G55020.1, AT5G26830.1, AT4G33010.1, AT1G36160.1, AT3G57050.1, AT3G02660.1, AT1G80560.1, AT1G05010.1, AT1G01610.1, AT3G16950.2, AT1G75330.1, AT1G29880.1, AT4G15560.1, AT3G03710.1, AT2G30200.1, AT3G13490.1, AT2G44160.1, AT4G16760.1, AT4G12130.1, AT1G43710.1, AT5G60600…	1.3e-36	8.8e-35	Cluster_2
GO:0019752	Biological process	carboxylic acid metabolic process	83	7.51812	ATCG00500.1, AT1G78680.1, AT1G62640.1, AT1G68530.1, AT4G32520.1, AT4G26900.1, AT1G22410.1, AT5G67030.1, AT1G29900.1, AT1G74040.1, AT1G55020.1, AT5G26830.1, AT4G33010.1, AT1G36160.1, AT3G57050.1, AT3G02660.1, AT1G80560.1, AT1G05010.1, AT1G01610.1, AT3G16950.2, AT1G75330.1, AT1G29880.1, AT4G15560.1, AT3G03710.1, AT2G30200.1, AT3G13490.1, AT2G44160.1, AT4G16760.1, AT4G12130.1, AT1G43710.1, AT5G60600…	1.3e-36	8.8e-35	Cluster_2
GO:0006082	Biological process	organic acid metabolic process	83	7.51812	ATCG00500.1, AT1G78680.1, AT1G62640.1, AT1G68530.1, AT4G32520.1, AT4G26900.1, AT1G22410.1, AT5G67030.1, AT1G29900.1, AT1G74040.1, AT1G55020.1, AT5G26830.1, AT4G33010.1, AT1G36160.1, AT3G57050.1, AT3G02660.1, AT1G80560.1, AT1G05010.1, AT1G01610.1, AT3G16950.2, AT1G75330.1, AT1G29880.1, AT4G15560.1, AT3G03710.1, AT2G30200.1, AT3G13490.1, AT2G44160.1, AT4G16760.1, AT4G12130.1, AT1G43710.1, AT5G60600…	1.4e-36	9.5e-35	Cluster_2
GO:0034641	Biological process	cellular nitrogen compound metabolic process	80	7.24638	AT1G55670.1, AT2G29630.2, AT4G37000.1, AT4G32520.1, AT4G26900.1, AT1G22410.1, AT1G29900.1, AT1G74040.1, AT3G23940.1, AT5G26830.1, AT4G33010.1, AT5G54810.1, AT3G57050.1, AT3G02660.1, AT1G80560.1, AT1G05010.1, AT1G09795.1, AT1G03475.1, AT1G75330.1, AT1G29880.1, AT4G15560.1, AT3G03710.1, AT4G38970.1, AT3G13490.1, AT3G07270.1, AT4G12130.1, AT1G43710.1, AT3G48730.1, AT3G53580.1, AT5G64300.1, AT5G52520…	4.5e-87	1.1e-84	Cluster_2
GO:0009628	Biological process	response to abiotic stimulus	77	6.97464	ATCG00120.1, AT5G02500.1, AT1G68530.1, AT3G50820.1, AT1G53240.1, AT4G29810.2, AT1G07890.3, AT4G09650.1, AT1G59960.1, AT3G26650.1, AT5G04140.2, AT5G20630.1, AT3G21240.1, AT5G63980.1, AT2G22240.1, AT1G14210.1, AT1G23740.1, AT1G15820.1, AT5G03740.1, AT5G07990.1, AT4G21150.1, AT4G31990.3, AT1G73990.1, AT4G03280.1, AT5G58140.2, AT3G57290.1, AT2G26250.1, AT2G47450.1, AT3G54050.1, AT4G31820.1, AT3G12780…	4.8e-51	4.7e-49	Cluster_2
GO:0032502	Biological process	developmental process	67	6.06884	AT5G13710.1, AT1G68530.1, AT1G02780.1, AT2G22250.2, AT3G44750.1, AT1G78630.1, AT1G12840.1, AT1G11870.2, AT3G04610.1, AT1G36160.1, AT3G57290.1, AT5G56680.1, AT5G63980.1, AT4G34200.1, AT3G53900.2, AT1G05190.1, AT3G42170.1, AT4G29060.1, AT3G13490.1, AT5G10360.1, AT4G16760.1, AT2G02560.1, AT1G43710.1, AT3G02660.1, AT5G63420.1, AT5G52520.1, AT3G46740.1, AT2G26250.1, AT3G10670.1, AT4G31820.1, AT2G02990…	2.4e-27	1.3e-25	Cluster_2
GO:0032501	Biological process	multicellular organismal process	65	5.88768	AT5G13710.1, AT1G68530.1, AT1G02780.1, AT2G22250.2, AT3G44750.1, AT1G78630.1, AT1G11870.2, AT3G04610.1, AT1G36160.1, AT3G57290.1, AT5G56680.1, AT5G63980.1, AT4G34200.1, AT1G05190.1, AT3G42170.1, AT4G29060.1, AT3G13490.1, AT5G10360.1, AT4G16760.1, AT2G02560.1, AT1G43710.1, AT3G02660.1, AT5G63420.1, AT5G52520.1, AT3G46740.1, AT2G26250.1, AT3G10670.1, AT4G31820.1, AT5G58140.2, AT5G06140.1, AT5G22800…	9.1e-28	4.9e-26	Cluster_2
GO:0006139	Biological process	nucleobase, nucleoside, nucleotide and nucleic acid metabolic process	64	5.7971	AT1G55670.1, ATCG00120.1, AT3G57610.1, AT3G57290.1, AT1G08200.1, AT2G19480.1, AT5G13450.1, AT5G16715.1, AT1G14650.1, AT4G39280.1, AT5G26830.1, AT5G64270.1, AT5G09250.1, AT5G04130.1, AT3G58660.1, AT5G05610.1, AT3G12130.1, AT5G63980.1, AT4G31580.1, AT3G22910.1, AT1G29880.1, AT5G64050.1, AT4G38970.1, AT3G13490.1, AT1G06190.1, AT1G14610.1, AT3G02660.1, AT3G19760.1, AT5G52520.1, AT4G25630.1, AT4G10320…	1.3e-25	5.8e-24	Cluster_2
GO:0042221	Biological process	response to chemical stimulus	63	5.70652	AT2G29630.2, AT3G25530.1, AT4G01070.1, AT1G53240.1, AT3G15360.1, AT4G09570.1, AT1G07890.3, AT5G63310.1, AT2G39940.1, AT3G26650.1, AT5G60160.1, AT5G10540.1, AT5G63980.1, AT2G22240.1, AT5G03740.1, AT1G29880.1, AT4G38970.1, AT2G19940.1, AT2G02560.1, AT5G60600.1, AT3G47860.1, AT4G34350.1, AT3G19760.1, AT3G58610.1, AT4G10320.1, AT4G33420.1, AT1G56190.1, AT1G56340.1, AT4G32770.1, AT2G45290.1, AT1G76100…	3.2e-30	1.9e-28	Cluster_2
GO:0006519	Biological process	cellular amino acid and derivative metabolic process	63	5.70652	AT1G78680.1, AT3G21240.1, AT4G32520.1, AT4G26900.1, AT1G22410.1, AT1G29900.1, AT1G74040.1, AT3G23940.1, AT5G26830.1, AT4G33010.1, AT3G57050.1, AT1G80560.1, AT1G05010.1, AT1G75330.1, AT1G29880.1, AT5G53850.2, AT3G13490.1, AT2G44160.1, AT5G07990.1, AT4G12130.1, AT1G43710.1, AT3G02660.1, AT3G54660.1, AT5G52520.1, AT3G58610.1, AT4G10320.1, AT3G48110.1, AT1G48850.1, AT5G35630.1, AT4G39980.1, AT5G22800…	3.2e-27	1.6e-25	Cluster_2
GO:0007275	Biological process	multicellular organismal development	63	5.70652	AT5G13710.1, AT1G68530.1, AT1G02780.1, AT2G22250.2, AT3G44750.1, AT1G78630.1, AT1G11870.2, AT3G04610.1, AT1G36160.1, AT3G57290.1, AT5G56680.1, AT5G63980.1, AT4G34200.1, AT1G05190.1, AT3G42170.1, AT4G29060.1, AT3G13490.1, AT5G10360.1, AT4G16760.1, AT2G02560.1, AT1G43710.1, AT3G02660.1, AT5G63420.1, AT5G52520.1, AT3G46740.1, AT2G26250.1, AT3G10670.1, AT4G31820.1, AT5G06140.1, AT5G22800.1, AT5G42080…	4.3e-27	2.1e-25	Cluster_2
GO:0065007	Biological process	biological regulation	60	5.43478	AT1G55670.1, AT4G15040.1, AT1G68530.1, AT3G50820.1, AT3G15360.1, AT1G73100.1, AT4G09570.1, AT4G33270.1, AT3G04610.1, AT2G39940.1, AT4G37000.1, AT5G05610.1, AT3G12130.1, AT5G63980.1, AT3G08510.1, AT3G03710.1, AT5G45390.1, AT2G22780.1, AT5G60600.1, AT5G52520.1, AT3G48110.1, AT4G31820.1, AT5G58140.2, AT5G42150.1, AT5G06140.1, AT4G32770.1, AT2G27040.1, AT4G04950.1, AT4G13940.1, AT4G04770.1, AT5G66570…	3.3e-14	8.5e-13	Cluster_2
GO:0048856	Biological process	anatomical structure development	56	5.07246	AT5G13710.1, AT1G68530.1, AT1G02780.1, AT2G22250.2, AT5G57020.1, AT1G78630.1, AT1G12840.1, AT1G11870.2, AT3G04610.1, AT1G36160.1, AT3G57290.1, AT5G56680.1, AT5G63980.1, AT1G05190.1, AT4G29060.1, AT3G13490.1, AT5G10360.1, AT5G45390.1, AT2G02560.1, AT1G43710.1, AT3G02660.1, AT5G63420.1, AT5G52520.1, AT3G46740.1, AT2G26250.1, AT3G10670.1, AT4G31820.1, AT5G06140.1, AT5G22800.1, AT5G42080.1, AT4G13940…	3.1e-30	1.9e-28	Cluster_2
GO:0009308	Biological process	amine metabolic process	55	4.98188	AT4G32520.1, AT4G26900.1, AT1G22410.1, AT1G29900.1, AT1G74040.1, AT3G23940.1, AT5G26830.1, AT4G33010.1, AT3G57050.1, AT1G80560.1, AT1G05010.1, AT1G75330.1, AT1G29880.1, AT5G53850.2, AT3G13490.1, AT2G44160.1, AT4G12130.1, AT1G43710.1, AT3G02660.1, AT3G53580.1, AT5G52520.1, AT4G10320.1, AT3G48110.1, AT1G48850.1, AT5G35630.1, AT4G39980.1, AT5G22800.1, AT3G58140.1, AT1G48520.1, AT1G48420.1, AT5G11880…	3.9e-56	4.2e-54	Cluster_2
GO:0044106	Biological process	cellular amine metabolic process	54	4.8913	AT4G32520.1, AT4G26900.1, AT1G22410.1, AT1G29900.1, AT1G74040.1, AT3G23940.1, AT5G26830.1, AT4G33010.1, AT3G57050.1, AT1G80560.1, AT1G05010.1, AT1G75330.1, AT1G29880.1, AT5G53850.2, AT3G13490.1, AT2G44160.1, AT4G12130.1, AT1G43710.1, AT3G02660.1, AT3G53580.1, AT5G52520.1, AT4G10320.1, AT3G48110.1, AT1G48850.1, AT5G35630.1, AT4G39980.1, AT5G22800.1, AT3G58140.1, AT1G48520.1, AT1G48420.1, AT5G11880…	4.5e-59	5.1e-57	Cluster_2
GO:0006520	Biological process	cellular amino acid metabolic process	54	4.8913	AT4G32520.1, AT4G26900.1, AT1G22410.1, AT1G29900.1, AT1G74040.1, AT3G23940.1, AT5G26830.1, AT4G33010.1, AT3G57050.1, AT1G80560.1, AT1G05010.1, AT1G75330.1, AT1G29880.1, AT5G53850.2, AT3G13490.1, AT2G44160.1, AT4G12130.1, AT1G43710.1, AT3G02660.1, AT3G53580.1, AT5G52520.1, AT4G10320.1, AT3G48110.1, AT1G48850.1, AT5G35630.1, AT4G39980.1, AT5G22800.1, AT3G58140.1, AT1G48520.1, AT1G48420.1, AT5G11880…	4.5e-59	5.1e-57	Cluster_2
GO:0051179	Biological process	localization	53	4.80072	AT1G72820.1, AT3G63130.1, AT5G13450.1, AT3G27530.1, AT5G13490.1, AT3G05420.2, AT1G27310.1, AT1G06950.1, AT5G64940.1, AT2G38270.1, AT3G22910.1, AT5G12860.1, AT3G21090.1, AT1G31730.1, AT1G42550.1, AT1G05520.1, AT2G25430.1, AT2G28800.1, AT5G58140.2, AT3G46740.1, AT2G47450.1, AT1G30630.1, AT4G31820.1, AT5G06140.1, AT4G32770.1, AT4G39460.1, AT4G32285.1, AT4G04640.1, AT2G26900.1, AT5G05000.2, AT2G36830…	7.5e-18	2.4e-16	Cluster_2
GO:0051234	Biological process	establishment of localization	52	4.71014	AT1G72820.1, AT3G63130.1, AT5G13450.1, AT3G27530.1, AT5G13490.1, AT3G05420.2, AT1G27310.1, AT1G06950.1, AT5G64940.1, AT2G38270.1, AT3G22910.1, AT5G12860.1, AT3G21090.1, AT1G31730.1, AT1G42550.1, AT1G05520.1, AT2G25430.1, AT2G28800.1, AT5G58140.2, AT3G46740.1, AT2G47450.1, AT1G30630.1, AT4G31820.1, AT5G06140.1, AT4G32770.1, AT4G39460.1, AT4G04640.1, AT2G26900.1, AT5G05000.2, AT2G36830.1, AT5G50920…	6.1e-18	2e-16	Cluster_2
GO:0006810	Biological process	transport	51	4.61957	AT1G72820.1, AT3G63130.1, AT5G13450.1, AT3G27530.1, AT5G13490.1, AT3G05420.2, AT1G27310.1, AT1G06950.1, AT5G64940.1, AT2G38270.1, AT3G22910.1, AT5G12860.1, AT3G21090.1, AT1G31730.1, AT1G05520.1, AT2G25430.1, AT2G28800.1, AT5G58140.2, AT3G46740.1, AT2G47450.1, AT1G30630.1, AT4G31820.1, AT5G06140.1, AT4G32770.1, AT4G39460.1, AT4G04640.1, AT2G26900.1, AT5G05000.2, AT2G36830.1, AT5G50920.1, AT4G24190…	1.9e-17	5.9e-16	Cluster_2
GO:0050789	Biological process	regulation of biological process	51	4.61957	AT1G55670.1, AT1G73100.1, AT3G50820.1, AT4G09570.1, AT4G33270.1, AT3G04610.1, AT2G39940.1, AT4G37000.1, AT5G05610.1, AT3G12130.1, AT5G63980.1, AT3G08510.1, AT3G03710.1, AT5G45390.1, AT2G22780.1, AT5G60600.1, AT5G52520.1, AT3G48110.1, AT4G31820.1, AT5G42150.1, AT5G06140.1, AT4G32770.1, AT2G27040.1, AT4G04950.1, AT4G13940.1, AT5G66570.1, AT2G36830.1, AT5G50920.1, AT4G24190.1, AT5G63310.1, AT4G35090…	6.7e-12	1.4e-10	Cluster_2
GO:0044271	Biological process	cellular nitrogen compound biosynthetic process	47	4.25725	AT2G29630.2, AT4G26900.1, AT1G22410.1, AT1G29900.1, AT1G74040.1, AT2G20690.1, AT5G54810.1, AT3G57050.1, AT1G80560.1, AT1G09795.1, AT1G03475.1, AT4G15560.1, AT3G03710.1, AT3G07270.1, AT3G48730.1, AT3G53580.1, AT5G64300.1, AT3G23940.1, AT3G58610.1, AT1G63970.1, AT5G16440.1, AT4G39980.1, AT5G11880.1, AT4G23100.1, AT5G54770.1, AT1G74470.1, AT5G50920.1, AT4G01690.1, AT1G08520.1, AT1G09830.1, AT3G03780…	1.7e-46	1.4e-44	Cluster_2
GO:0009791	Biological process	post-embryonic development	46	4.16667	AT5G13710.1, AT1G02780.1, AT2G22250.2, AT1G78630.1, AT1G11870.2, AT3G04610.1, AT1G36160.1, AT5G56680.1, AT5G63980.1, AT1G05190.1, AT3G42170.1, AT4G29060.1, AT3G13490.1, AT5G10360.1, AT5G17710.2, AT2G02560.1, AT1G43710.1, AT3G02660.1, AT5G63420.1, AT5G52520.1, AT3G57290.1, AT3G10670.1, AT4G31820.1, AT5G22800.1, AT5G42080.1, AT4G13940.1, AT4G23100.1, AT5G62640.3, AT1G49430.1, AT1G03160.1, AT1G18450…	7e-15	1.8e-13	Cluster_2
GO:0016043	Biological process	cellular component organization	46	4.16667	AT1G68530.1, AT3G50820.1, AT2G19480.1, AT3G51880.2, AT5G23120.1, AT2G41740.1, AT1G11870.2, AT3G57290.1, AT1G06950.1, AT5G63980.1, ATCG00680.1, AT5G64050.1, AT1G42550.1, AT5G45390.1, AT4G14960.2, AT5G15450.1, AT2G25430.1, AT2G28800.1, AT1G67230.1, AT3G46740.1, AT5G59970.1, AT3G10670.1, AT5G58140.2, AT5G16620.1, AT2G27040.1, AT4G39460.1, AT3G26710.1, AT5G24020.1, AT1G55020.1, AT5G66570.1, AT5G50920…	5.7e-07	7.8e-06	Cluster_2
GO:0009266	Biological process	response to temperature stimulus	44	3.98551	ATCG00120.1, AT5G02500.1, AT1G68530.1, AT1G53240.1, AT1G07890.3, AT4G09650.1, AT1G67280.1, AT3G26650.1, AT5G20630.1, AT5G63980.1, AT2G22240.1, AT4G21150.1, AT4G31990.3, AT2G26250.1, AT3G54050.1, AT3G12780.1, AT4G32770.1, AT5G67590.1, AT5G06290.1, AT1G23740.1, AT5G54770.1, AT4G24190.1, AT4G23100.1, AT1G42970.1, AT1G32060.1, ATCG00480.1, AT4G37930.1, AT5G49910.1, AT3G01500.2, AT1G16880.1, AT3G47520…	3.6e-48	3.3e-46	Cluster_2
GO:0003006	Biological process	reproductive developmental process	44	3.98551	AT5G13710.1, AT1G02780.1, AT2G22250.2, AT1G78630.1, AT1G11870.2, AT3G04610.1, AT1G36160.1, AT5G56680.1, AT5G63980.1, AT1G05190.1, AT4G29060.1, AT3G13490.1, AT5G10360.1, AT5G17710.2, AT2G02560.1, AT1G43710.1, AT3G02660.1, AT5G63420.1, AT5G52520.1, AT3G57290.1, AT3G10670.1, AT4G31820.1, AT5G22800.1, AT5G42080.1, AT4G13940.1, AT4G23100.1, AT5G62640.3, AT1G03160.1, AT1G18450.1, AT5G16715.1, AT5G22640…	4.9e-09	8e-08	Cluster_2
GO:0022414	Biological process	reproductive process	44	3.98551	AT5G13710.1, AT1G02780.1, AT2G22250.2, AT1G78630.1, AT1G11870.2, AT3G04610.1, AT1G36160.1, AT5G56680.1, AT5G63980.1, AT1G05190.1, AT4G29060.1, AT3G13490.1, AT5G10360.1, AT5G17710.2, AT2G02560.1, AT1G43710.1, AT3G02660.1, AT5G63420.1, AT5G52520.1, AT3G57290.1, AT3G10670.1, AT4G31820.1, AT5G22800.1, AT5G42080.1, AT4G13940.1, AT4G23100.1, AT5G62640.3, AT1G03160.1, AT1G18450.1, AT5G16715.1, AT5G22640…	6.6e-07	8.9e-06	Cluster_2
GO:0000003	Biological process	reproduction	44	3.98551	AT5G13710.1, AT1G02780.1, AT2G22250.2, AT1G78630.1, AT1G11870.2, AT3G04610.1, AT1G36160.1, AT5G56680.1, AT5G63980.1, AT1G05190.1, AT4G29060.1, AT3G13490.1, AT5G10360.1, AT5G17710.2, AT2G02560.1, AT1G43710.1, AT3G02660.1, AT5G63420.1, AT5G52520.1, AT3G57290.1, AT3G10670.1, AT4G31820.1, AT5G22800.1, AT5G42080.1, AT4G13940.1, AT4G23100.1, AT5G62640.3, AT1G03160.1, AT1G18450.1, AT5G16715.1, AT5G22640…	1e-06	1.3e-05	Cluster_2
GO:0006091	Biological process	generation of precursor metabolites and energy	43	3.89493	AT1G55670.1, AT3G50820.1, AT2G47940.1, AT5G13450.1, AT3G15840.1, ATCG00540.1, AT4G09650.1, AT1G06680.1, AT3G26650.1, AT4G22890.1, AT5G11770.1, ATCG00680.1, ATMG00510.1, AT2G29560.1, AT4G03280.1, AT5G08410.1, AT3G12780.1, AT1G56190.1, AT5G39830.1, ATCG01110.1, AT5G66570.1, AT4G04640.1, AT2G46820.1, AT3G61470.1, AT5G64040.2, AT1G42970.1, AT2G34430.1, ATCG00480.1, AT1G79040.1, AT1G60600.2, AT1G60950…	2.6e-47	2.3e-45	Cluster_2
GO:0050794	Biological process	regulation of cellular process	43	3.89493	AT1G55670.1, AT3G50820.1, AT4G09570.1, AT4G33270.1, AT5G63310.1, AT2G39940.1, AT4G37000.1, AT5G05610.1, AT3G12130.1, AT5G63980.1, AT3G08510.1, AT3G03710.1, AT5G60600.1, AT5G52520.1, AT2G22780.1, AT5G58140.2, AT5G42150.1, AT5G06140.1, AT2G27040.1, AT4G04950.1, AT4G13940.1, AT5G66570.1, AT2G36830.1, AT5G50920.1, AT4G35090.1, AT1G33590.1, AT3G60860.1, AT2G02990.1, AT3G02060.1, AT3G56070.1, AT5G09660…	5.2e-10	9.2e-09	Cluster_2
GO:0048608	Biological process	reproductive structure development	43	3.89493	AT5G13710.1, AT1G02780.1, AT2G22250.2, AT1G78630.1, AT1G11870.2, AT3G04610.1, AT1G36160.1, AT5G56680.1, AT5G63980.1, AT1G05190.1, AT4G29060.1, AT3G13490.1, AT5G10360.1, AT5G17710.2, AT2G02560.1, AT1G43710.1, AT3G02660.1, AT5G63420.1, AT5G52520.1, AT3G57290.1, AT3G10670.1, AT4G31820.1, AT5G22800.1, AT5G42080.1, AT4G13940.1, AT4G23100.1, AT5G62640.3, AT1G03160.1, AT1G18450.1, AT5G16715.1, AT5G22640…	1.4e-08	2.1e-07	Cluster_2
GO:0005975	Biological process	carbohydrate metabolic process	42	3.80435	AT3G04790.1, AT3G55800.1, AT1G07110.1, AT2G21170.1, AT1G67280.1, AT3G26650.1, AT3G26720.1, AT2G22240.1, AT2G36390.1, AT4G15560.1, AT3G03710.1, AT4G38970.1, AT4G21150.1, AT2G29560.1, AT5G60600.1, AT4G34350.1, AT1G55850.1, AT5G56350.1, AT3G54050.1, AT1G63970.1, AT3G12780.1, AT1G56190.1, AT1G30620.1, AT2G36850.1, AT1G68560.1, AT4G24620.1, AT4G23100.1, AT1G42970.1, AT1G80160.1, AT4G37800.1, AT5G24300…	6.6e-09	1.1e-07	Cluster_2
GO:0016070	Biological process	RNA metabolic process	41	3.71377	AT5G16715.1, AT1G14650.1, AT4G39280.1, AT5G26830.1, AT1G11870.2, AT5G09250.1, AT3G57290.1, AT3G58660.1, AT5G05610.1, AT5G64270.1, AT5G63980.1, AT4G31580.1, AT1G29880.1, AT5G64050.1, AT3G13490.1, AT3G50670.1, AT1G14610.1, AT3G02660.1, AT3G19760.1, AT5G52520.1, AT4G25630.1, AT4G10320.1, AT3G48110.1, AT4G25500.1, AT2G27040.1, AT3G58140.1, AT4G13940.1, AT1G48520.1, AT1G14900.1, AT1G60900.1, ATCG00180…	5.2e-23	2e-21	Cluster_2
GO:0009056	Biological process	catabolic process	40	3.62319	AT4G37000.1, AT4G01070.1, AT3G22110.1, AT1G06430.1, AT4G33010.1, AT2G39940.1, AT3G26650.1, AT2G47110.1, AT5G63980.1, AT5G08100.1, AT4G38970.1, AT4G16760.1, AT4G12130.1, AT2G29560.1, AT5G45620.1, AT2G22780.1, AT1G29150.1, AT3G12780.1, AT1G56190.1, AT1G68560.1, AT1G78870.1, AT3G24360.1, AT1G42970.1, AT3G09270.1, AT2G41680.1, AT2G21330.1, AT4G37930.1, AT3G63520.1, AT4G35090.1, AT5G06460.1, AT1G78380…	2.6e-25	1.1e-23	Cluster_2
GO:0016053	Biological process	organic acid biosynthetic process	38	3.44203	AT1G68530.1, AT4G26900.1, AT1G22410.1, AT1G29900.1, AT2G29690.1, AT1G36160.1, AT3G57050.1, AT1G80560.1, AT1G62640.1, AT5G53850.2, AT2G30200.1, AT4G16760.1, AT3G53580.1, AT3G23940.1, AT1G01610.1, AT4G39980.1, AT5G11880.1, AT1G55020.1, AT2G43750.1, AT1G49430.1, AT3G03780.1, ATCG00500.1, AT1G74040.1, AT5G42650.1, AT1G09795.1, AT2G38040.1, AT1G48850.1, AT5G66120.2, AT3G58610.1, AT2G17265.1, AT5G67030…	1.7e-38	1.3e-36	Cluster_2
GO:0046394	Biological process	carboxylic acid biosynthetic process	38	3.44203	AT1G68530.1, AT4G26900.1, AT1G22410.1, AT1G29900.1, AT2G29690.1, AT1G36160.1, AT3G57050.1, AT1G80560.1, AT1G62640.1, AT5G53850.2, AT2G30200.1, AT4G16760.1, AT3G53580.1, AT3G23940.1, AT1G01610.1, AT4G39980.1, AT5G11880.1, AT1G55020.1, AT2G43750.1, AT1G49430.1, AT3G03780.1, ATCG00500.1, AT1G74040.1, AT5G42650.1, AT1G09795.1, AT2G38040.1, AT1G48850.1, AT5G66120.2, AT3G58610.1, AT2G17265.1, AT5G67030…	1.7e-38	1.3e-36	Cluster_2
GO:0046483	Biological process	heterocycle metabolic process	37	3.35145	AT1G78680.1, ATCG00120.1, AT3G57610.1, AT4G26900.1, AT5G13450.1, AT5G54770.1, AT2G29690.1, AT5G54810.1, AT4G37000.1, AT1G09795.1, AT1G03475.1, AT4G15560.1, AT3G03710.1, AT5G08280.1, AT1G06190.1, AT3G48730.1, AT1G63970.1, AT5G16440.1, AT4G32770.1, AT4G23100.1, AT5G54160.1, AT4G04640.1, AT1G74470.1, AT3G22910.1, AT5G50920.1, AT1G08520.1, ATCG00480.1, AT1G09830.1, AT3G07270.1, AT4G25080.3, AT1G36280…	2.1e-31	1.4e-29	Cluster_2
GO:0044248	Biological process	cellular catabolic process	37	3.35145	AT4G37000.1, AT4G01070.1, AT3G22110.1, AT1G06430.1, AT4G33010.1, AT2G39940.1, AT3G26650.1, AT2G47110.1, AT5G63980.1, AT4G38970.1, AT4G16760.1, AT4G12130.1, AT2G29560.1, AT5G45620.1, AT2G22780.1, AT1G29150.1, AT3G12780.1, AT1G56190.1, AT1G78870.1, AT3G24360.1, AT1G42970.1, AT3G09270.1, AT2G41680.1, AT2G21330.1, AT4G37930.1, AT3G63520.1, AT4G35090.1, AT5G06460.1, AT1G78380.1, AT5G09660.4, AT4G24820…	1.3e-08	2e-07	Cluster_2
GO:0006629	Biological process	lipid metabolic process	36	3.26087	AT5G13710.1, AT1G68530.1, AT1G36160.1, AT1G29660.1, AT1G01610.1, AT2G22240.1, AT4G15560.1, AT3G03710.1, AT4G16760.1, AT5G60600.1, AT4G34350.1, AT2G26250.1, AT4G14210.1, AT2G22780.1, AT1G63970.1, AT5G16440.1, AT4G32770.1, AT1G72970.1, AT5G13640.1, AT3G24360.1, AT1G49430.1, ATCG00500.1, AT3G63520.1, AT3G45140.1, AT5G42650.1, AT1G06820.1, AT2G30200.1, AT2G38040.1, AT5G09660.4, AT4G16820.1, AT5G67030…	8.7e-07	1.2e-05	Cluster_2
GO:0006996	Biological process	organelle organization	34	3.07971	AT2G19480.1, AT3G51880.2, AT5G23120.1, AT2G41740.1, AT1G11870.2, AT1G06950.1, AT5G64050.1, AT1G42550.1, AT5G45390.1, AT4G14960.2, AT5G15450.1, AT2G25430.1, AT2G28800.1, AT1G67230.1, AT3G46740.1, AT5G59970.1, AT3G10670.1, AT5G58140.2, AT5G16620.1, AT2G27040.1, AT4G39460.1, AT1G18450.1, AT5G24020.1, AT5G50920.1, AT4G32285.1, AT5G55280.1, AT1G03160.1, AT1G06820.1, AT5G42080.1, AT5G35220.1, AT4G13940…	1.1e-08	1.7e-07	Cluster_2
GO:0009416	Biological process	response to light stimulus	33	2.98913	AT1G68530.1, AT3G50820.1, AT5G63310.1, AT3G26650.1, AT5G04140.2, AT3G21240.1, AT5G63980.1, AT2G22240.1, AT1G15820.1, AT5G07990.1, AT1G73990.1, AT4G03280.1, AT5G58140.2, AT3G57290.1, AT2G26250.1, AT2G47450.1, AT3G08940.2, AT4G31820.1, AT4G32770.1, AT1G76570.1, AT5G66570.1, AT1G42970.1, AT5G62640.3, AT4G35090.1, AT4G10340.1, AT1G67090.1, AT1G18450.1, AT5G35220.1, AT5G67030.1, AT3G62030.2, AT1G60950…	2.3e-09	3.9e-08	Cluster_2
GO:0009314	Biological process	response to radiation	33	2.98913	AT1G68530.1, AT3G50820.1, AT5G63310.1, AT3G26650.1, AT5G04140.2, AT3G21240.1, AT5G63980.1, AT2G22240.1, AT1G15820.1, AT5G07990.1, AT1G73990.1, AT4G03280.1, AT5G58140.2, AT3G57290.1, AT2G26250.1, AT2G47450.1, AT3G08940.2, AT4G31820.1, AT4G32770.1, AT1G76570.1, AT5G66570.1, AT1G42970.1, AT5G62640.3, AT4G35090.1, AT4G10340.1, AT1G67090.1, AT1G18450.1, AT5G35220.1, AT5G67030.1, AT3G62030.2, AT1G60950…	4.8e-09	7.8e-08	Cluster_2
GO:0051704	Biological process	multi-organism process	33	2.98913	AT5G02500.1, AT3G04790.1, AT3G21240.1, AT1G53240.1, AT2G19480.1, AT4G39980.1, AT3G44750.1, AT5G35620.1, AT2G39940.1, AT4G37000.1, AT1G05010.1, AT2G22240.1, AT5G12860.1, AT4G16760.1, AT4G01050.1, AT5G60600.1, AT4G37980.1, AT2G27040.1, AT2G03440.1, AT4G37990.1, AT4G23100.1, AT1G49430.1, AT1G80600.1, AT3G45140.1, AT5G42650.1, AT2G47800.1, AT2G17420.1, AT4G01370.1, AT4G29810.2, AT5G61410.1, AT1G55490…	2.5e-06	3.2e-05	Cluster_2
GO:0009790	Biological process	embryonic development	32	2.89855	AT5G13710.1, AT1G02780.1, AT2G22250.2, AT5G57020.1, AT1G07890.3, AT1G36160.1, AT5G56680.1, AT4G29060.1, AT1G05190.1, AT5G10360.1, AT5G17710.2, AT3G10670.1, AT1G43710.1, AT3G02660.1, AT5G63420.1, AT1G78630.1, AT3G46740.1, AT3G48110.1, AT4G31820.1, AT5G22800.1, AT4G13940.1, AT2G03150.1, AT5G16715.1, AT5G22640.1, AT1G48850.1, AT5G42080.1, AT3G04400.1, AT1G14610.1, AT5G61410.1, AT2G28000.1, AT1G43170…	4.4e-28	2.4e-26	Cluster_2
GO:0044262	Biological process	cellular carbohydrate metabolic process	32	2.89855	AT3G55800.1, AT1G07110.1, AT3G26650.1, AT3G26720.1, AT2G22240.1, AT2G36390.1, AT4G15560.1, AT3G03710.1, AT4G38970.1, AT2G29560.1, AT5G60600.1, AT4G34350.1, AT1G78570.1, AT3G54050.1, AT1G63970.1, AT3G12780.1, AT1G56190.1, AT1G30620.1, AT2G36850.1, AT4G24620.1, AT4G23100.1, AT1G42970.1, AT4G37800.1, AT5G24300.1, AT2G21330.1, AT5G49650.1, AT2G37090.1, AT2G35840.1, AT5G64860.1, AT5G56350.1, AT4G21150…	3e-25	1.3e-23	Cluster_2
GO:0006508	Biological process	proteolysis	32	2.89855	AT4G15040.1, AT2G47940.1, AT4G30920.1, AT3G22110.1, AT2G39940.1, AT2G47110.1, AT5G60160.1, AT3G02090.2, AT3G51800.2, AT1G73990.1, AT5G45620.1, AT5G10540.1, AT1G29150.1, AT3G12203.1, AT5G42390.1, AT5G39830.1, AT4G30020.1, AT1G78870.1, AT1G25510.1, AT5G51740.1, AT1G51760.1, AT5G42240.1, AT2G47390.1, AT5G06460.1, AT3G19170.1, AT4G24820.1, AT3G27925.1, AT5G05740.1, AT2G32730.1, AT5G51750.1, AT5G23210…	2.9e-05	0.00034	Cluster_2
GO:0019684	Biological process	photosynthesis, light reaction	31	2.80797	AT1G55670.1, AT3G50820.1, AT2G47940.1, ATCG01110.1, ATCG00540.1, AT4G09650.1, AT1G06680.1, AT4G22890.1, ATCG00680.1, ATCG00270.1, AT4G03280.1, AT5G08410.1, AT5G39830.1, AT5G66570.1, AT4G04640.1, AT2G46820.1, AT3G61470.1, AT5G64040.2, AT2G34430.1, AT1G79040.1, AT1G60600.2, AT4G12800.1, AT3G27925.1, ATCG00340.1, AT1G60950.1, AT1G15980.1, ATCG00280.1, ATCG00020.1, AT1G68830.1, AT5G35220.1, AT3G54890…	1.7e-26	8e-25	Cluster_2
GO:0048316	Biological process	seed development	31	2.80797	AT5G13710.1, AT1G02780.1, AT2G22250.2, AT5G52520.1, AT1G07890.3, AT1G36160.1, AT5G56680.1, AT4G29060.1, AT1G05190.1, AT5G10360.1, AT5G17710.2, AT3G10670.1, AT1G43710.1, AT3G02660.1, AT5G63420.1, AT1G78630.1, AT3G48110.1, AT4G31820.1, AT5G22800.1, AT4G13940.1, AT2G03150.1, AT5G16715.1, AT5G22640.1, AT1G48850.1, AT5G42080.1, AT2G17420.1, AT3G04400.1, AT1G14610.1, AT5G61410.1, AT1G43170.1, AT5G26742…	1.4e-25	6.2e-24	Cluster_2
GO:0010154	Biological process	fruit development	31	2.80797	AT5G13710.1, AT1G02780.1, AT2G22250.2, AT5G52520.1, AT1G07890.3, AT1G36160.1, AT5G56680.1, AT4G29060.1, AT1G05190.1, AT5G10360.1, AT5G17710.2, AT3G10670.1, AT1G43710.1, AT3G02660.1, AT5G63420.1, AT1G78630.1, AT3G48110.1, AT4G31820.1, AT5G22800.1, AT4G13940.1, AT2G03150.1, AT5G16715.1, AT5G22640.1, AT1G48850.1, AT5G42080.1, AT2G17420.1, AT3G04400.1, AT1G14610.1, AT5G61410.1, AT1G43170.1, AT5G26742…	1.3e-24	5.2e-23	Cluster_2
GO:0032787	Biological process	monocarboxylic acid metabolic process	30	2.71739	AT1G78680.1, AT1G68530.1, AT1G36160.1, AT1G01610.1, AT3G16950.2, AT4G15560.1, AT3G03710.1, AT3G07270.1, AT4G16760.1, AT1G06130.1, AT5G60600.1, AT4G34350.1, AT1G62640.1, AT2G26250.1, AT2G22780.1, AT1G63970.1, AT4G32770.1, AT1G72970.1, AT3G24360.1, AT1G49430.1, ATCG00500.1, AT3G45140.1, AT5G42650.1, AT2G30200.1, AT2G38040.1, AT5G09660.4, AT5G67030.1, AT1G55020.1, AT5G42740.1, AT5G54810.1	1.9e-24	7.4e-23	Cluster_2
GO:0044255	Biological process	cellular lipid metabolic process	30	2.71739	AT1G68530.1, AT1G36160.1, AT1G01610.1, AT2G22240.1, AT4G15560.1, AT3G03710.1, AT4G16760.1, AT5G60600.1, AT4G34350.1, AT2G26250.1, AT4G14210.1, AT2G22780.1, AT1G63970.1, AT5G16440.1, AT4G32770.1, AT1G72970.1, AT3G24360.1, AT1G49430.1, ATCG00500.1, AT3G63520.1, AT3G45140.1, AT5G42650.1, AT1G06820.1, AT2G30200.1, AT2G38040.1, AT5G09660.4, AT5G67030.1, AT1G55020.1, AT3G10230.1, AT1G62640.1	3.5e-07	4.8e-06	Cluster_2
GO:0051186	Biological process	cofactor metabolic process	29	2.62681	AT1G55670.1, AT1G78680.1, AT4G37000.1, AT3G16950.2, AT4G15560.1, AT3G03710.1, AT4G38970.1, AT3G07270.1, AT3G48730.1, AT3G54660.1, AT3G10670.1, AT1G63970.1, AT5G16440.1, AT4G32770.1, AT4G23100.1, AT4G04770.1, AT1G74470.1, AT5G50920.1, AT1G08520.1, AT2G21330.1, AT5G49460.1, AT5G08280.1, AT1G60600.2, AT4G25080.3, AT1G01710.1, AT5G54190.1, AT1G69740.1, AT4G01690.1, AT1G03630.1	3.7e-28	2.1e-26	Cluster_2
GO:0009793	Biological process	embryonic development ending in seed dormancy	29	2.62681	AT5G13710.1, AT1G02780.1, AT2G22250.2, AT1G07890.3, AT1G36160.1, AT5G56680.1, AT4G29060.1, AT1G05190.1, AT5G10360.1, AT5G17710.2, AT3G10670.1, AT1G43710.1, AT3G02660.1, AT5G63420.1, AT1G78630.1, AT3G48110.1, AT4G31820.1, AT5G22800.1, AT4G13940.1, AT2G03150.1, AT5G16715.1, AT5G22640.1, AT1G48850.1, AT5G42080.1, AT3G04400.1, AT1G14610.1, AT5G61410.1, AT1G43170.1, AT5G26742.2	5.3e-25	2.2e-23	Cluster_2
GO:0051707	Biological process	response to other organism	29	2.62681	AT5G02500.1, AT3G04790.1, AT3G21240.1, AT1G53240.1, AT4G39980.1, AT5G35620.1, AT2G39940.1, AT4G37000.1, AT1G05010.1, AT2G22240.1, AT5G12860.1, AT4G16760.1, AT4G01050.1, AT5G60600.1, AT4G37980.1, AT2G27040.1, AT2G03440.1, AT4G37990.1, AT4G23100.1, AT1G49430.1, AT1G80600.1, AT3G45140.1, AT5G42650.1, AT2G47800.1, AT4G01370.1, AT4G29810.2, AT5G61410.1, AT1G55490.1, AT1G55020.1	4.1e-22	1.6e-20	Cluster_2
GO:0009607	Biological process	response to biotic stimulus	29	2.62681	AT5G02500.1, AT3G04790.1, AT3G21240.1, AT1G53240.1, AT4G39980.1, AT5G35620.1, AT2G39940.1, AT4G37000.1, AT1G05010.1, AT2G22240.1, AT5G12860.1, AT4G16760.1, AT4G01050.1, AT5G60600.1, AT4G37980.1, AT2G27040.1, AT2G03440.1, AT4G37990.1, AT4G23100.1, AT1G49430.1, AT1G80600.1, AT3G45140.1, AT5G42650.1, AT2G47800.1, AT4G01370.1, AT4G29810.2, AT5G61410.1, AT1G55490.1, AT1G55020.1	3e-06	3.8e-05	Cluster_2
GO:0051641	Biological process	cellular localization	27	2.44565	AT1G72820.1, AT3G63130.1, AT3G27530.1, AT1G27310.1, AT1G06950.1, AT1G31730.1, AT1G42550.1, AT2G28800.1, AT3G46740.1, AT2G47450.1, AT1G30630.1, AT5G58140.2, AT5G06140.1, AT4G39460.1, AT5G05000.2, AT5G50920.1, AT4G24190.1, AT4G23100.1, AT3G16620.1, AT5G05010.1, AT4G02510.1, AT1G62020.1, AT2G18710.1, AT5G28750.1, AT5G16620.1, AT3G62030.2, AT2G44610.1	6.8e-06	8.3e-05	Cluster_2
GO:0008610	Biological process	lipid biosynthetic process	26	2.35507	AT5G13710.1, AT1G68530.1, AT5G67030.1, AT1G36160.1, AT1G01610.1, AT2G22240.1, AT4G15560.1, AT3G03710.1, AT4G16760.1, AT5G60600.1, AT4G34350.1, AT2G26250.1, AT4G14210.1, AT1G63970.1, AT5G16440.1, AT1G49430.1, ATCG00500.1, AT3G45140.1, AT5G42650.1, AT1G06820.1, AT2G30200.1, AT2G38040.1, AT1G62640.1, AT1G58440.1, AT1G55020.1, AT3G10230.1	3.6e-19	1.2e-17	Cluster_2
GO:0051649	Biological process	establishment of localization in cell	26	2.35507	AT1G72820.1, AT3G63130.1, AT3G27530.1, AT1G27310.1, AT1G06950.1, AT1G31730.1, AT1G42550.1, AT2G28800.1, AT3G46740.1, AT2G47450.1, AT1G30630.1, AT5G58140.2, AT5G06140.1, AT4G39460.1, AT5G05000.2, AT5G50920.1, AT4G24190.1, AT3G16620.1, AT5G05010.1, AT4G02510.1, AT1G62020.1, AT2G18710.1, AT5G28750.1, AT5G16620.1, AT3G62030.2, AT2G44610.1	4e-06	5.1e-05	Cluster_2
GO:0008652	Biological process	cellular amino acid biosynthetic process	25	2.26449	AT4G39980.1, AT1G22410.1, AT1G29900.1, AT1G74040.1, AT3G57050.1, AT1G80560.1, AT5G53850.2, AT3G53580.1, AT3G23940.1, AT4G26900.1, AT5G11880.1, AT1G09795.1, AT3G03780.1, AT1G31230.1, AT2G29690.1, AT1G48850.1, AT5G66120.2, AT3G58610.1, AT2G17265.1, AT2G43750.1, AT3G57560.1, AT2G45440.1, AT5G54810.1, AT3G62030.2, AT1G02500.1	1.1e-28	6.5e-27	Cluster_2
GO:0009309	Biological process	amine biosynthetic process	25	2.26449	AT4G39980.1, AT1G22410.1, AT1G29900.1, AT1G74040.1, AT3G57050.1, AT1G80560.1, AT5G53850.2, AT3G53580.1, AT3G23940.1, AT4G26900.1, AT5G11880.1, AT1G09795.1, AT3G03780.1, AT1G31230.1, AT2G29690.1, AT1G48850.1, AT5G66120.2, AT3G58610.1, AT2G17265.1, AT2G43750.1, AT3G57560.1, AT2G45440.1, AT5G54810.1, AT3G62030.2, AT1G02500.1	6.8e-27	3.3e-25	Cluster_2
GO:0044085	Biological process	cellular component biogenesis	25	2.26449	AT1G02780.1, AT2G19480.1, AT5G23120.1, AT5G42080.1, AT4G25630.1, AT3G50820.1, ATCG00680.1, AT2G25430.1, AT1G55850.1, AT3G57290.1, AT5G59970.1, AT1G30620.1, AT3G26710.1, AT5G66570.1, AT4G32285.1, AT2G36620.1, AT2G34480.1, AT3G44890.1, AT2G37090.1, AT5G35220.1, AT4G11630.1, AT1G32990.1, AT1G09340.1, AT2G40010.1, AT1G79040.1	4.1e-20	1.4e-18	Cluster_2
GO:0009057	Biological process	macromolecule catabolic process	25	2.26449	AT3G22110.1, AT1G06430.1, AT2G39940.1, AT3G26650.1, AT2G47110.1, AT5G63980.1, AT5G08100.1, AT4G38970.1, AT2G29560.1, AT5G45620.1, AT1G29150.1, AT3G12780.1, AT1G56190.1, AT1G68560.1, AT1G78870.1, AT1G42970.1, AT2G21330.1, AT5G06460.1, AT4G24820.1, AT5G64860.1, AT5G56350.1, AT5G42270.1, AT2G32730.1, AT5G42740.1, AT5G64570.1	0.042	0.29	Cluster_2
GO:0010033	Biological process	response to organic substance	24	2.17391	AT4G09570.1, AT5G63310.1, AT1G36160.1, AT3G26650.1, AT5G63980.1, AT4G38970.1, AT2G02560.1, AT5G60600.1, AT2G36830.1, AT4G23100.1, AT1G42970.1, AT3G45140.1, AT5G42650.1, AT5G03740.1, AT2G02990.1, AT4G01370.1, AT5G35220.1, AT5G67030.1, ATCG00490.1, AT1G78570.1, AT2G39940.1, AT1G55020.1, AT3G62030.2, AT4G05530.1	2e-10	3.7e-09	Cluster_2
GO:0051716	Biological process	cellular response to stimulus	24	2.17391	AT4G01070.1, AT2G19480.1, AT1G04980.1, AT4G09570.1, AT5G63310.1, AT2G39940.1, AT5G63980.1, ATCG00420.1, AT5G60600.1, AT4G37980.1, AT4G37990.1, AT5G54770.1, AT1G78870.1, AT2G36830.1, AT4G23100.1, AT4G35090.1, AT4G37930.1, AT2G41680.1, AT2G02990.1, AT1G78380.1, AT4G01370.1, AT5G67030.1, AT1G23010.1, AT1G78570.1	0.0059	0.046	Cluster_2
GO:0010035	Biological process	response to inorganic substance	23	2.08333	AT1G53240.1, AT1G07890.3, AT5G63310.1, AT5G60160.1, AT5G10540.1, AT2G22240.1, AT1G29880.1, AT2G19940.1, AT3G09440.1, AT4G10320.1, AT1G56190.1, AT2G45290.1, AT1G76100.1, AT4G23100.1, AT3G20390.1, AT2G41680.1, AT4G35090.1, AT3G18190.1, AT3G48990.1, AT2G35840.1, AT5G13420.1, AT5G42740.1, AT3G58610.1	1.2e-25	5.3e-24	Cluster_2
GO:0006066	Biological process	alcohol metabolic process	23	2.08333	AT5G13710.1, AT1G07110.1, AT3G26650.1, AT3G26720.1, AT2G22240.1, AT4G15560.1, AT3G03710.1, AT4G38970.1, AT2G29560.1, AT5G60600.1, AT4G34350.1, AT1G78570.1, AT3G54050.1, AT1G63970.1, AT3G12780.1, AT1G56190.1, AT1G30620.1, AT1G42970.1, AT2G21330.1, AT5G49650.1, AT1G58440.1, AT5G56350.1, AT5G42740.1	5.5e-20	1.9e-18	Cluster_2
GO:0006952	Biological process	defense response	23	2.08333	AT3G04790.1, AT1G53240.1, AT4G24770.1, AT2G39940.1, AT4G37000.1, AT2G22240.1, AT4G16760.1, AT4G01050.1, AT5G60600.1, AT4G37980.1, AT4G32770.1, AT2G27040.1, AT4G37990.1, AT4G23100.1, AT1G49430.1, AT4G37930.1, AT1G80600.1, AT5G42650.1, AT1G33590.1, AT4G01370.1, AT4G29810.2, AT1G55490.1, AT1G55020.1	3.2e-17	9.6e-16	Cluster_2
GO:0033036	Biological process	macromolecule localization	23	2.08333	AT3G63130.1, AT3G05420.2, AT1G27310.1, AT1G06950.1, AT1G31730.1, AT2G28800.1, AT3G46740.1, AT2G47450.1, AT4G31820.1, AT5G06140.1, AT5G05000.2, AT5G50920.1, AT4G24190.1, AT4G23100.1, AT3G16620.1, AT5G05010.1, AT5G55220.1, AT4G02510.1, AT1G62020.1, AT2G18710.1, AT5G28750.1, AT5G16620.1, AT3G62030.2	1.8e-16	5.2e-15	Cluster_2
GO:0044265	Biological process	cellular macromolecule catabolic process	22	1.99275	AT3G22110.1, AT1G06430.1, AT2G39940.1, AT3G26650.1, AT2G47110.1, AT5G63980.1, AT4G38970.1, AT2G29560.1, AT5G45620.1, AT1G29150.1, AT3G12780.1, AT1G56190.1, AT1G78870.1, AT1G42970.1, AT2G21330.1, AT5G06460.1, AT4G24820.1, AT5G64860.1, AT5G56350.1, AT5G42270.1, AT2G32730.1, AT5G42740.1	3.1e-21	1.1e-19	Cluster_2
GO:0018130	Biological process	heterocycle biosynthetic process	22	1.99275	AT4G26900.1, AT2G29690.1, AT5G54810.1, AT1G03475.1, AT4G15560.1, AT3G03710.1, AT3G07270.1, AT3G48730.1, AT1G63970.1, AT5G16440.1, AT5G54770.1, AT1G74470.1, AT5G50920.1, AT1G08520.1, AT1G09795.1, AT5G08280.1, AT4G25080.3, AT2G29630.2, AT5G54190.1, AT1G69740.1, AT4G01690.1, AT1G03630.1	8e-16	2.3e-14	Cluster_2
GO:0009657	Biological process	plastid organization	22	1.99275	AT5G23120.1, AT1G11870.2, AT1G06950.1, AT5G36170.1, AT1G42550.1, AT5G45390.1, AT3G10670.1, AT5G15450.1, AT2G28800.1, AT3G46740.1, AT5G55280.1, AT5G58140.2, AT5G16620.1, AT4G39460.1, AT5G24020.1, AT5G50920.1, AT1G03160.1, AT1G06820.1, AT5G35220.1, AT5G64050.1, AT2G28000.1, AT1G09340.1	2.2e-15	5.8e-14	Cluster_2
GO:0051188	Biological process	cofactor biosynthetic process	21	1.90217	AT4G15560.1, AT3G03710.1, AT4G25080.3, AT3G07270.1, AT5G50920.1, AT3G48730.1, AT1G08520.1, AT4G23100.1, AT4G01690.1, AT1G69740.1, AT3G10670.1, AT1G63970.1, AT1G74470.1, AT1G60600.2, AT5G16440.1, AT5G49460.1, AT5G54190.1, AT5G08280.1, AT3G16950.2, AT4G04770.1, AT1G03630.1	4.6e-22	1.7e-20	Cluster_2
GO:0055114	Biological process	oxidation reduction	21	1.90217	AT1G55670.1, AT5G13440.1, AT4G04640.1, AT3G50820.1, AT2G46820.1, AT5G66570.1, ATCG00270.1, AT1G60950.1, ATCG01110.1, AT4G03280.1, AT5G64040.2, AT3G15840.1, ATCG00540.1, AT4G09650.1, AT1G71500.1, AT1G15980.1, AT4G22890.1, AT5G11770.1, ATCG00420.1, AT1G60600.2, ATMG00510.1	7.4e-22	2.7e-20	Cluster_2
GO:0034660	Biological process	ncRNA metabolic process	21	1.90217	AT1G29880.1, AT5G64050.1, AT3G58140.1, AT3G13490.1, AT1G48520.1, AT3G48110.1, AT3G04600.1, AT3G02660.1, AT5G52520.1, AT4G25630.1, AT1G14610.1, AT5G26830.1, AT1G11870.2, AT1G09340.1, AT1G72550.1, AT5G16715.1, AT5G22800.1, AT5G63980.1, AT4G39280.1, AT1G50200.1, AT4G10320.1	7.4e-22	2.7e-20	Cluster_2
GO:0009605	Biological process	response to external stimulus	21	1.90217	AT1G78380.1, AT3G21240.1, AT5G06140.1, AT4G16760.1, AT5G35220.1, AT5G58140.2, AT2G29630.2, AT1G23010.1, AT5G63310.1, AT4G35090.1, AT3G45140.1, AT1G51760.1, AT2G39940.1, AT1G55020.1, AT5G42650.1, AT4G39980.1, AT4G01370.1, AT3G25230.2, ATCG00420.1, AT2G02990.1, AT2G47800.1	7e-17	2.1e-15	Cluster_2
GO:0008104	Biological process	protein localization	21	1.90217	AT1G31730.1, AT4G02510.1, AT5G05000.2, AT5G50920.1, AT4G24190.1, AT1G62020.1, AT2G28800.1, AT3G46740.1, AT2G18710.1, AT2G47450.1, AT3G63130.1, AT4G31820.1, AT5G55220.1, AT5G28750.1, AT5G06140.1, AT5G16620.1, AT1G06950.1, AT1G27310.1, AT3G62030.2, AT3G16620.1, AT5G05010.1	5e-16	1.4e-14	Cluster_2
GO:0005996	Biological process	monosaccharide metabolic process	20	1.81159	AT5G56350.1, AT3G03710.1, AT1G42970.1, AT2G21330.1, AT3G26650.1, AT4G15560.1, AT2G29560.1, AT5G60600.1, AT4G34350.1, AT1G78570.1, AT3G54050.1, AT1G07110.1, AT3G12780.1, AT1G56190.1, AT1G63970.1, AT5G42740.1, AT4G38970.1, AT3G26720.1, AT5G49650.1, AT1G30620.1	1.8e-18	5.8e-17	Cluster_2
GO:0045184	Biological process	establishment of protein localization	20	1.81159	AT1G31730.1, AT4G02510.1, AT5G05000.2, AT5G50920.1, AT4G24190.1, AT1G62020.1, AT2G28800.1, AT3G46740.1, AT2G18710.1, AT2G47450.1, AT3G63130.1, AT5G55220.1, AT5G28750.1, AT5G06140.1, AT5G16620.1, AT1G06950.1, AT1G27310.1, AT3G62030.2, AT3G16620.1, AT5G05010.1	1.1e-15	2.9e-14	Cluster_2
GO:0015031	Biological process	protein transport	20	1.81159	AT1G31730.1, AT4G02510.1, AT5G05000.2, AT5G50920.1, AT4G24190.1, AT1G62020.1, AT2G28800.1, AT3G46740.1, AT2G18710.1, AT2G47450.1, AT3G63130.1, AT5G55220.1, AT5G28750.1, AT5G06140.1, AT5G16620.1, AT1G06950.1, AT1G27310.1, AT3G62030.2, AT3G16620.1, AT5G05010.1	1.1e-15	2.9e-14	Cluster_2
GO:0046907	Biological process	intracellular transport	20	1.81159	AT1G31730.1, AT4G02510.1, AT5G05000.2, AT1G72820.1, AT5G50920.1, AT3G63130.1, AT3G27530.1, AT1G62020.1, AT2G28800.1, AT3G46740.1, AT3G62030.2, AT2G47450.1, AT1G30630.1, AT1G27310.1, AT5G06140.1, AT5G16620.1, AT1G06950.1, AT4G39460.1, AT3G16620.1, AT5G05010.1	1.9e-13	4.8e-12	Cluster_2
GO:0042440	Biological process	pigment metabolic process	20	1.81159	AT4G15560.1, AT3G03710.1, AT4G25080.3, AT4G37000.1, AT5G50920.1, AT3G10230.1, AT1G08520.1, AT5G67030.1, AT1G63970.1, AT1G09830.1, AT4G14210.1, AT1G78570.1, AT1G74470.1, AT5G16440.1, AT1G03630.1, AT1G06820.1, AT5G54190.1, AT5G08280.1, AT2G02990.1, AT5G54160.1	7.5e-13	1.7e-11	Cluster_2
GO:0019748	Biological process	secondary metabolic process	20	1.81159	AT1G55670.1, AT1G78380.1, AT3G03710.1, AT4G38970.1, AT3G21240.1, AT5G07990.1, AT3G10230.1, AT4G23100.1, AT5G67030.1, AT1G63970.1, AT4G14210.1, AT2G21330.1, AT1G78570.1, AT3G63520.1, AT4G32770.1, AT1G06820.1, AT3G09270.1, AT1G12840.1, AT2G02990.1, AT5G54160.1	0.00055	0.0053	Cluster_2
GO:0006725	Biological process	cellular aromatic compound metabolic process	19	1.72101	AT1G78680.1, AT5G66120.2, AT5G54770.1, AT3G21240.1, AT3G07270.1, AT5G07990.1, AT4G39980.1, AT4G23100.1, AT2G29630.2, AT2G02990.1, AT2G29690.1, AT1G09830.1, AT1G78570.1, AT1G02500.1, AT1G22410.1, AT5G54810.1, AT1G12840.1, AT1G48850.1, AT5G54160.1	3.4e-13	8.1e-12	Cluster_2
GO:0046148	Biological process	pigment biosynthetic process	19	1.72101	AT4G15560.1, AT3G03710.1, AT4G25080.3, AT5G50920.1, AT3G10230.1, AT1G08520.1, AT5G67030.1, AT1G63970.1, AT1G09830.1, AT4G14210.1, AT1G78570.1, AT1G74470.1, AT5G16440.1, AT1G03630.1, AT1G06820.1, AT5G54190.1, AT5G08280.1, AT2G02990.1, AT5G54160.1	4.1e-13	9.4e-12	Cluster_2
GO:0019222	Biological process	regulation of metabolic process	19	1.72101	AT1G55670.1, AT5G66570.1, AT3G03710.1, AT5G09660.4, AT3G50820.1, AT3G02060.1, AT5G50920.1, AT5G52520.1, AT1G14900.1, AT2G22780.1, AT5G09250.1, AT5G05610.1, AT3G12130.1, AT2G27040.1, AT1G68830.1, AT5G63980.1, AT1G73100.1, AT4G13940.1, AT4G29190.1	7.7e-05	0.00085	Cluster_2
GO:0010038	Biological process	response to metal ion	18	1.63043	AT1G29880.1, AT3G48990.1, AT2G35840.1, AT2G19940.1, AT1G53240.1, AT3G18190.1, AT4G23100.1, AT5G13420.1, AT3G20390.1, AT4G10320.1, AT5G42740.1, AT1G56190.1, AT5G60160.1, AT5G10540.1, AT2G45290.1, AT1G76100.1, AT3G58610.1, AT3G09440.1	2.1e-20	7.4e-19	Cluster_2
GO:0006457	Biological process	protein folding	18	1.63043	AT1G75690.1, AT5G02500.1, AT5G55220.1, AT5G17710.2, AT1G55490.1, AT4G24190.1, AT3G09440.1, AT5G49910.1, AT4G33060.1, AT4G39710.1, AT2G43560.1, AT5G56000.1, AT3G56070.1, AT2G28000.1, AT3G01480.1, AT3G62600.1, AT1G79940.1, AT3G62030.2	2.5e-17	7.5e-16	Cluster_2
GO:0006631	Biological process	fatty acid metabolic process	18	1.63043	AT2G30200.1, AT5G09660.4, AT4G16760.1, AT3G24360.1, AT1G72970.1, AT1G62640.1, AT1G49430.1, AT2G26250.1, AT2G22780.1, ATCG00500.1, AT1G36160.1, AT1G55020.1, AT5G42650.1, AT4G32770.1, AT1G01610.1, AT1G68530.1, AT2G38040.1, AT3G45140.1	1.1e-16	3.1e-15	Cluster_2
GO:0006418	Biological process	tRNA aminoacylation for protein translation	18	1.63043	AT1G29880.1, AT5G64050.1, AT3G13490.1, AT3G48110.1, AT3G04600.1, AT3G02660.1, AT5G52520.1, AT4G39280.1, AT1G14610.1, AT5G26830.1, AT1G11870.2, AT1G48520.1, AT1G72550.1, AT5G16715.1, AT5G22800.1, AT3G58140.1, AT1G50200.1, AT4G10320.1	2.1e-13	4.9e-12	Cluster_2
GO:0043038	Biological process	amino acid activation	18	1.63043	AT1G29880.1, AT5G64050.1, AT3G13490.1, AT3G48110.1, AT3G04600.1, AT3G02660.1, AT5G52520.1, AT4G39280.1, AT1G14610.1, AT5G26830.1, AT1G11870.2, AT1G48520.1, AT1G72550.1, AT5G16715.1, AT5G22800.1, AT3G58140.1, AT1G50200.1, AT4G10320.1	2.1e-13	4.9e-12	Cluster_2
GO:0043039	Biological process	tRNA aminoacylation	18	1.63043	AT1G29880.1, AT5G64050.1, AT3G13490.1, AT3G48110.1, AT3G04600.1, AT3G02660.1, AT5G52520.1, AT4G39280.1, AT1G14610.1, AT5G26830.1, AT1G11870.2, AT1G48520.1, AT1G72550.1, AT5G16715.1, AT5G22800.1, AT3G58140.1, AT1G50200.1, AT4G10320.1	2.1e-13	4.9e-12	Cluster_2
GO:0043412	Biological process	macromolecule modification	18	1.63043	AT5G66570.1, AT5G57020.1, AT3G50820.1, AT4G21150.1, AT4G04720.1, AT1G56140.1, AT1G22870.1, AT1G48480.1, AT4G25630.1, AT1G14650.1, AT4G24770.1, AT5G58140.2, AT3G58500.1, AT2G47110.1, AT2G27040.1, AT4G09570.1, AT5G06460.1, AT3G01510.1	2.3e-07	3.3e-06	Cluster_2
GO:0031323	Biological process	regulation of cellular metabolic process	18	1.63043	AT1G55670.1, AT5G66570.1, AT3G03710.1, AT5G09660.4, AT3G50820.1, AT3G02060.1, AT5G50920.1, AT5G52520.1, AT1G14900.1, AT2G22780.1, AT5G09250.1, AT5G05610.1, AT3G12130.1, AT2G27040.1, AT1G68830.1, AT5G63980.1, AT4G13940.1, AT4G29190.1	4.1e-05	0.00046	Cluster_2
GO:0006790	Biological process	sulfur metabolic process	17	1.53986	AT5G53850.2, AT5G54770.1, AT1G31190.1, AT2G44160.1, AT2G17265.1, AT3G54660.1, AT2G43750.1, AT2G29630.2, AT3G62030.2, AT3G03780.1, AT3G57050.1, AT1G05010.1, AT1G19920.1, AT5G63980.1, AT4G23100.1, AT1G02500.1, AT1G48420.1	1.1e-15	3.1e-14	Cluster_2
GO:0070727	Biological process	cellular macromolecule localization	17	1.53986	AT1G31730.1, AT4G02510.1, AT5G05000.2, AT5G50920.1, AT3G63130.1, AT4G23100.1, AT1G62020.1, AT2G28800.1, AT3G46740.1, AT3G62030.2, AT2G47450.1, AT3G16620.1, AT5G06140.1, AT5G16620.1, AT1G06950.1, AT1G27310.1, AT5G05010.1	4.1e-14	1.1e-12	Cluster_2
GO:0022900	Biological process	electron transport chain	17	1.53986	AT1G55670.1, AT5G66570.1, AT4G04640.1, AT3G50820.1, AT2G46820.1, ATCG00270.1, AT1G60950.1, ATCG01110.1, AT4G03280.1, AT5G64040.2, AT3G15840.1, ATCG00540.1, AT4G09650.1, AT1G15980.1, AT4G22890.1, AT5G11770.1, AT1G60600.2	9.2e-13	2e-11	Cluster_2
GO:0033013	Biological process	tetrapyrrole metabolic process	17	1.53986	AT4G15560.1, AT3G03710.1, AT4G25080.3, AT4G37000.1, AT5G50920.1, AT3G48730.1, AT1G08520.1, AT1G69740.1, AT1G63970.1, AT1G74470.1, AT5G16440.1, AT4G32770.1, AT5G54190.1, AT5G08280.1, AT1G03475.1, AT4G01690.1, AT1G03630.1	1.4e-12	3.1e-11	Cluster_2
GO:0006886	Biological process	intracellular protein transport	16	1.44928	AT1G31730.1, AT4G02510.1, AT5G05000.2, AT5G50920.1, AT3G63130.1, AT1G62020.1, AT2G28800.1, AT3G46740.1, AT3G62030.2, AT2G47450.1, AT3G16620.1, AT5G06140.1, AT5G16620.1, AT1G06950.1, AT1G27310.1, AT5G05010.1	3.9e-13	9.1e-12	Cluster_2
GO:0034613	Biological process	cellular protein localization	16	1.44928	AT1G31730.1, AT4G02510.1, AT5G05000.2, AT5G50920.1, AT3G63130.1, AT1G62020.1, AT2G28800.1, AT3G46740.1, AT3G62030.2, AT2G47450.1, AT3G16620.1, AT5G06140.1, AT5G16620.1, AT1G06950.1, AT1G27310.1, AT5G05010.1	3.9e-13	9.1e-12	Cluster_2
GO:0006778	Biological process	porphyrin metabolic process	16	1.44928	AT4G15560.1, AT3G03710.1, AT4G25080.3, AT4G37000.1, AT5G50920.1, AT3G48730.1, AT1G08520.1, AT1G69740.1, AT1G63970.1, AT1G74470.1, AT5G16440.1, AT4G32770.1, AT5G54190.1, AT5G08280.1, AT4G01690.1, AT1G03630.1	9.4e-12	2e-10	Cluster_2
GO:0016051	Biological process	carbohydrate biosynthetic process	16	1.44928	AT2G35840.1, AT1G42970.1, AT2G22240.1, AT4G23100.1, AT3G04790.1, AT1G55850.1, AT3G55800.1, AT5G24300.1, AT1G78570.1, AT2G21170.1, AT3G26650.1, AT5G42740.1, AT1G30620.1, AT2G37090.1, AT2G36850.1, AT2G36390.1	1e-10	1.9e-09	Cluster_2
GO:0006464	Biological process	protein modification process	16	1.44928	AT5G66570.1, AT5G57020.1, AT3G50820.1, AT4G21150.1, AT1G56140.1, AT1G22870.1, AT1G48480.1, AT4G04720.1, AT1G14650.1, AT5G58140.2, AT3G58500.1, AT2G47110.1, AT2G27040.1, AT4G09570.1, AT5G06460.1, AT3G01510.1	3e-07	4.2e-06	Cluster_2
GO:0033014	Biological process	tetrapyrrole biosynthetic process	15	1.3587	AT4G15560.1, AT3G03710.1, AT4G25080.3, AT5G50920.1, AT3G48730.1, AT1G08520.1, AT1G69740.1, AT1G63970.1, AT1G74470.1, AT5G16440.1, AT5G54190.1, AT5G08280.1, AT1G03475.1, AT4G01690.1, AT1G03630.1	7.4e-12	1.6e-10	Cluster_2
GO:0006979	Biological process	response to oxidative stress	15	1.3587	ATMG01190.1, AT1G78380.1, AT4G33420.1, AT3G15360.1, AT4G35090.1, AT1G07890.3, AT5G63310.1, AT1G56340.1, AT3G25530.1, AT4G32770.1, AT3G47860.1, AT2G41680.1, AT5G54810.1, AT2G22240.1, AT3G62030.2	9.7e-09	1.5e-07	Cluster_2
GO:0006396	Biological process	RNA processing	15	1.3587	AT4G24770.1, AT3G50670.1, AT5G64200.1, AT3G13570.1, AT3G19760.1, AT1G14650.1, AT1G60900.1, AT5G36170.1, AT5G64270.1, AT4G25630.1, AT1G09340.1, AT3G58660.1, AT4G25500.1, AT3G58140.1, AT4G31580.1	0.0091	0.068	Cluster_2
GO:0009617	Biological process	response to bacterium	14	1.26812	AT4G37980.1, AT1G53240.1, AT4G01050.1, AT5G60600.1, AT4G23100.1, AT3G04790.1, AT2G39940.1, AT1G55020.1, AT4G39980.1, AT2G27040.1, AT1G80600.1, AT4G37990.1, AT2G22240.1, AT2G03440.1	1.3e-13	3.2e-12	Cluster_2
GO:0043933	Biological process	macromolecular complex subunit organization	14	1.26812	AT5G66570.1, AT3G50820.1, AT2G19480.1, AT5G35220.1, AT2G25430.1, AT2G47020.1, AT3G57290.1, AT5G59970.1, AT5G36170.1, AT5G23120.1, AT1G79040.1, AT3G26710.1, ATCG00680.1, AT4G32285.1	7.2e-13	1.6e-11	Cluster_2
GO:0055086	Biological process	nucleobase, nucleoside and nucleotide metabolic process	14	1.26812	AT1G55670.1, ATCG00120.1, AT4G04640.1, AT4G38970.1, AT1G06190.1, AT5G13450.1, AT3G57610.1, AT1G09830.1, AT2G21330.1, AT3G22910.1, ATCG00480.1, AT1G36280.1, AT1G02500.1, AT3G53900.2	2e-11	4.1e-10	Cluster_2
GO:0006779	Biological process	porphyrin biosynthetic process	14	1.26812	AT4G15560.1, AT3G03710.1, AT4G25080.3, AT5G50920.1, AT3G48730.1, AT1G08520.1, AT1G69740.1, AT1G63970.1, AT1G74470.1, AT5G16440.1, AT5G54190.1, AT5G08280.1, AT4G01690.1, AT1G03630.1	3.3e-11	6.4e-10	Cluster_2
GO:0019438	Biological process	aromatic compound biosynthetic process	14	1.26812	AT5G66120.2, AT5G54770.1, AT3G07270.1, AT5G07990.1, AT4G39980.1, AT1G12840.1, AT2G29630.2, AT2G29690.1, AT1G78570.1, AT2G02990.1, AT5G54810.1, AT1G22410.1, AT1G48850.1, AT5G54160.1	5.2e-11	9.7e-10	Cluster_2
GO:0070887	Biological process	cellular response to chemical stimulus	14	1.26812	AT1G78380.1, AT2G36830.1, AT4G01070.1, AT5G60600.1, AT5G67030.1, AT4G09570.1, AT5G63310.1, AT4G35090.1, AT2G41680.1, AT1G78570.1, AT2G39940.1, AT5G63980.1, AT2G02990.1, AT4G01370.1	5.9e-10	1e-08	Cluster_2
GO:0006575	Biological process	cellular amino acid derivative metabolic process	14	1.26812	AT1G78680.1, AT5G54810.1, AT3G21240.1, AT5G07990.1, AT3G54660.1, AT2G29690.1, AT1G12840.1, AT1G78570.1, AT2G02990.1, AT1G05010.1, AT5G54160.1, AT4G23100.1, AT1G02500.1, AT1G48420.1	1.2e-09	2e-08	Cluster_2
GO:0033554	Biological process	cellular response to stress	14	1.26812	AT1G78380.1, AT5G54770.1, AT1G78870.1, AT2G19480.1, AT4G23100.1, AT4G37980.1, AT1G04980.1, AT1G23010.1, AT2G41680.1, AT4G37930.1, AT4G35090.1, AT4G37990.1, ATCG00420.1, AT2G02990.1	4.5e-08	6.6e-07	Cluster_2
GO:0080090	Biological process	regulation of primary metabolic process	14	1.26812	AT5G66570.1, AT3G03710.1, AT5G09660.4, AT3G50820.1, AT3G02060.1, AT1G14900.1, AT2G22780.1, AT5G09250.1, AT5G05610.1, AT3G12130.1, AT2G27040.1, AT5G63980.1, AT4G13940.1, AT4G29190.1	0.0019	0.016	Cluster_2
GO:0006955	Biological process	immune response	14	1.26812	AT4G01370.1, AT5G60600.1, AT4G23100.1, AT4G37980.1, AT4G29810.2, AT4G24770.1, AT4G37930.1, AT2G39940.1, AT1G55490.1, AT1G55020.1, AT4G37000.1, AT2G27040.1, AT4G37990.1, AT2G22240.1	0.0043	0.034	Cluster_2
GO:0002376	Biological process	immune system process	14	1.26812	AT4G01370.1, AT5G60600.1, AT4G23100.1, AT4G37980.1, AT4G29810.2, AT4G24770.1, AT4G37930.1, AT2G39940.1, AT1G55490.1, AT1G55020.1, AT4G37000.1, AT2G27040.1, AT4G37990.1, AT2G22240.1	0.0044	0.035	Cluster_2
GO:0006605	Biological process	protein targeting	13	1.17754	AT4G02510.1, AT5G05000.2, AT5G50920.1, AT3G63130.1, AT2G28800.1, AT3G46740.1, AT2G47450.1, AT3G16620.1, AT5G06140.1, AT5G16620.1, AT1G06950.1, AT1G27310.1, AT3G62030.2	2.9e-12	6.2e-11	Cluster_2
GO:0019318	Biological process	hexose metabolic process	13	1.17754	AT5G56350.1, AT4G38970.1, AT2G21330.1, AT2G29560.1, AT1G42970.1, AT1G07110.1, AT3G54050.1, AT1G78570.1, AT3G12780.1, AT1G56190.1, AT3G26650.1, AT5G42740.1, AT3G26720.1	1e-11	2.1e-10	Cluster_2
GO:0043687	Biological process	post-translational protein modification	13	1.17754	AT5G66570.1, AT3G50820.1, AT1G56140.1, AT1G22870.1, AT1G48480.1, AT4G04720.1, AT4G09570.1, AT5G58140.2, AT3G58500.1, AT2G47110.1, AT2G27040.1, AT5G06460.1, AT3G01510.1	1.8e-11	3.7e-10	Cluster_2
GO:0022607	Biological process	cellular component assembly	13	1.17754	AT5G66570.1, AT3G50820.1, AT2G19480.1, AT5G35220.1, AT2G25430.1, AT5G23120.1, AT3G57290.1, AT5G59970.1, AT1G79040.1, AT3G26710.1, ATCG00680.1, AT4G32285.1, AT5G42080.1	4.2e-11	7.9e-10	Cluster_2
GO:0006970	Biological process	response to osmotic stress	13	1.17754	AT5G03740.1, AT4G01370.1, AT1G53240.1, AT4G24190.1, AT5G11150.1, AT5G67030.1, AT4G29810.2, AT3G62030.2, AT1G59960.1, AT5G67590.1, AT5G63980.1, AT1G14210.1, AT1G15690.1	8.8e-08	1.3e-06	Cluster_2
GO:0009889	Biological process	regulation of biosynthetic process	13	1.17754	AT1G14900.1, AT3G03710.1, AT5G09660.4, AT3G02060.1, AT5G50920.1, AT2G22780.1, AT5G09250.1, AT5G05610.1, AT3G12130.1, AT2G27040.1, AT5G63980.1, AT4G13940.1, AT4G29190.1	0.0038	0.03	Cluster_2
GO:0031326	Biological process	regulation of cellular biosynthetic process	13	1.17754	AT1G14900.1, AT3G03710.1, AT5G09660.4, AT3G02060.1, AT5G50920.1, AT2G22780.1, AT5G09250.1, AT5G05610.1, AT3G12130.1, AT2G27040.1, AT5G63980.1, AT4G13940.1, AT4G29190.1	0.0038	0.03	Cluster_2
GO:0045087	Biological process	innate immune response	13	1.17754	AT4G01370.1, AT5G60600.1, AT4G23100.1, AT4G37980.1, AT4G29810.2, AT4G24770.1, AT4G37930.1, AT2G39940.1, AT1G55490.1, AT1G55020.1, AT4G37000.1, AT2G27040.1, AT4G37990.1	0.0065	0.05	Cluster_2
GO:0060255	Biological process	regulation of macromolecule metabolic process	13	1.17754	AT1G55670.1, AT5G66570.1, AT1G73100.1, AT3G50820.1, AT3G02060.1, AT1G14900.1, AT5G09250.1, AT5G05610.1, AT3G12130.1, AT2G27040.1, AT5G63980.1, AT4G13940.1, AT4G29190.1	0.011	0.079	Cluster_2
GO:0006633	Biological process	fatty acid biosynthetic process	12	1.08696	AT2G30200.1, AT1G68530.1, AT4G16760.1, AT1G62640.1, AT1G01610.1, ATCG00500.1, AT1G36160.1, AT1G55020.1, AT5G42650.1, AT1G49430.1, AT2G38040.1, AT3G45140.1	2.7e-14	7.1e-13	Cluster_2
GO:0016052	Biological process	carbohydrate catabolic process	12	1.08696	AT1G68560.1, AT4G38970.1, AT2G29560.1, AT1G42970.1, AT5G64860.1, AT2G21330.1, AT5G56350.1, AT3G12780.1, AT1G56190.1, AT3G26650.1, AT5G42740.1, AT5G64570.1	1.1e-11	2.3e-10	Cluster_2
GO:0065003	Biological process	macromolecular complex assembly	12	1.08696	AT5G66570.1, AT3G50820.1, AT2G19480.1, AT5G35220.1, AT2G25430.1, AT5G23120.1, AT3G57290.1, AT5G59970.1, AT1G79040.1, AT3G26710.1, ATCG00680.1, AT4G32285.1	3e-11	6e-10	Cluster_2
GO:0009611	Biological process	response to wounding	12	1.08696	AT3G21240.1, AT4G01370.1, AT4G16760.1, AT4G39980.1, AT3G25230.2, AT3G45140.1, AT1G51760.1, AT2G39940.1, AT1G55020.1, AT5G42650.1, AT2G02990.1, AT2G47800.1	4.2e-11	7.9e-10	Cluster_2
GO:0006753	Biological process	nucleoside phosphate metabolic process	12	1.08696	AT1G55670.1, ATCG00120.1, AT4G04640.1, AT4G38970.1, AT1G06190.1, AT5G13450.1, AT3G57610.1, AT1G09830.1, AT2G21330.1, ATCG00480.1, AT1G36280.1, AT3G22910.1	4.2e-11	7.9e-10	Cluster_2
GO:0009117	Biological process	nucleotide metabolic process	12	1.08696	AT1G55670.1, ATCG00120.1, AT4G04640.1, AT4G38970.1, AT1G06190.1, AT5G13450.1, AT3G57610.1, AT1G09830.1, AT2G21330.1, ATCG00480.1, AT1G36280.1, AT3G22910.1	4.2e-11	7.9e-10	Cluster_2
GO:0034621	Biological process	cellular macromolecular complex subunit organization	12	1.08696	AT5G66570.1, AT3G50820.1, AT2G19480.1, AT5G35220.1, AT2G25430.1, AT2G47020.1, AT5G59970.1, AT5G36170.1, AT1G79040.1, AT3G26710.1, ATCG00680.1, AT4G32285.1	1e-10	1.9e-09	Cluster_2
GO:0006720	Biological process	isoprenoid metabolic process	12	1.08696	AT4G15560.1, AT3G03710.1, AT3G63520.1, AT5G60600.1, AT4G34350.1, AT4G14210.1, AT4G32770.1, AT1G63970.1, AT5G16440.1, AT3G10230.1, AT1G06820.1, AT5G67030.1	2.4e-10	4.2e-09	Cluster_2
GO:0009066	Biological process	aspartate family amino acid metabolic process	12	1.08696	AT5G53850.2, AT5G11880.1, AT2G44160.1, AT2G17265.1, AT3G53580.1, AT3G03780.1, AT1G31230.1, AT3G57050.1, AT2G45440.1, AT1G05010.1, AT1G02500.1, AT1G48420.1	4.5e-08	6.6e-07	Cluster_2
GO:0005976	Biological process	polysaccharide metabolic process	11	0.996377	AT1G68560.1, AT1G55850.1, AT5G64860.1, AT4G37800.1, AT3G55800.1, AT5G24300.1, AT4G24620.1, AT2G37090.1, AT2G36390.1, AT2G36850.1, AT5G64570.1	2.8e-11	5.6e-10	Cluster_2
GO:0006732	Biological process	coenzyme metabolic process	11	0.996377	AT1G55670.1, AT1G78680.1, AT4G38970.1, AT3G07270.1, AT3G54660.1, AT4G23100.1, AT1G01710.1, AT2G21330.1, AT5G49460.1, AT3G16950.2, AT1G60600.2	1.2e-10	2.2e-09	Cluster_2
GO:0034637	Biological process	cellular carbohydrate biosynthetic process	11	0.996377	AT2G35840.1, AT2G22240.1, AT4G23100.1, AT3G55800.1, AT5G24300.1, AT1G78570.1, AT5G42740.1, AT1G30620.1, AT2G37090.1, AT2G36850.1, AT2G36390.1	7.7e-10	1.3e-08	Cluster_2
GO:0042398	Biological process	cellular amino acid derivative biosynthetic process	11	0.996377	AT5G54810.1, AT5G07990.1, AT4G23100.1, AT2G29690.1, AT1G78570.1, AT2G02990.1, AT1G05010.1, AT5G54160.1, AT1G12840.1, AT1G02500.1, AT1G48420.1	1.4e-07	2e-06	Cluster_2
GO:0009651	Biological process	response to salt stress	11	0.996377	AT5G03740.1, AT4G01370.1, AT1G53240.1, AT4G24190.1, AT5G11150.1, AT4G29810.2, AT3G62030.2, AT1G59960.1, AT5G63980.1, AT1G14210.1, AT1G15690.1	1e-06	1.4e-05	Cluster_2
GO:0006350	Biological process	transcription	11	0.996377	AT1G14900.1, AT3G02060.1, AT3G57290.1, AT5G09250.1, ATCG00180.1, AT5G05610.1, AT3G12130.1, AT2G27040.1, AT5G63980.1, AT4G13940.1, AT4G29190.1	0.031	0.22	Cluster_2
GO:0010468	Biological process	regulation of gene expression	11	0.996377	AT1G55670.1, AT1G14900.1, AT1G73100.1, AT3G02060.1, AT5G09250.1, AT5G05610.1, AT3G12130.1, AT2G27040.1, AT5G63980.1, AT4G13940.1, AT4G29190.1	0.041	0.28	Cluster_2
GO:0006461	Biological process	protein complex assembly	10	0.905797	AT5G66570.1, AT3G50820.1, AT5G35220.1, AT2G25430.1, AT5G23120.1, AT3G57290.1, ATCG00680.1, AT1G79040.1, AT3G26710.1, AT4G32285.1	6.7e-10	1.2e-08	Cluster_2
GO:0070271	Biological process	protein complex biogenesis	10	0.905797	AT5G66570.1, AT3G50820.1, AT5G35220.1, AT2G25430.1, AT5G23120.1, AT3G57290.1, ATCG00680.1, AT1G79040.1, AT3G26710.1, AT4G32285.1	6.7e-10	1.2e-08	Cluster_2
GO:0034622	Biological process	cellular macromolecular complex assembly	10	0.905797	AT5G66570.1, AT3G50820.1, AT2G19480.1, AT5G35220.1, AT2G25430.1, AT5G59970.1, AT1G79040.1, AT3G26710.1, ATCG00680.1, AT4G32285.1	4.4e-09	7.2e-08	Cluster_2
GO:0009414	Biological process	response to water deprivation	10	0.905797	AT1G78380.1, AT3G63520.1, AT4G24190.1, AT5G67030.1, AT1G58440.1, AT5G03740.1, AT3G45140.1, AT5G63980.1, AT1G15690.1, AT2G47800.1	1.3e-08	2e-07	Cluster_2
GO:0008299	Biological process	isoprenoid biosynthetic process	10	0.905797	AT4G15560.1, AT3G03710.1, AT5G67030.1, AT5G60600.1, AT4G34350.1, AT4G14210.1, AT1G63970.1, AT5G16440.1, AT3G10230.1, AT1G06820.1	1.3e-08	2e-07	Cluster_2
GO:0009415	Biological process	response to water	10	0.905797	AT1G78380.1, AT3G63520.1, AT4G24190.1, AT5G67030.1, AT1G58440.1, AT5G03740.1, AT3G45140.1, AT5G63980.1, AT1G15690.1, AT2G47800.1	4e-08	6e-07	Cluster_2
GO:0000096	Biological process	sulfur amino acid metabolic process	10	0.905797	AT5G53850.2, AT2G44160.1, AT2G17265.1, AT2G43750.1, AT3G03780.1, AT3G57050.1, AT1G05010.1, AT3G62030.2, AT1G02500.1, AT1G48420.1	8.6e-07	1.2e-05	Cluster_2
GO:0044272	Biological process	sulfur compound biosynthetic process	10	0.905797	AT5G53850.2, AT5G54770.1, AT2G29630.2, AT2G17265.1, AT4G23100.1, AT2G43750.1, AT3G03780.1, AT3G57050.1, AT3G62030.2, AT1G02500.1	2.2e-05	0.00026	Cluster_2
GO:0009653	Biological process	anatomical structure morphogenesis	10	0.905797	AT1G68530.1, AT4G24190.1, AT1G12840.1, AT5G57020.1, AT3G46740.1, AT1G49430.1, AT1G36160.1, AT5G63980.1, AT3G16640.1, AT5G42080.1	5e-05	0.00055	Cluster_2
GO:0044275	Biological process	cellular carbohydrate catabolic process	10	0.905797	AT4G38970.1, AT2G29560.1, AT1G42970.1, AT5G64860.1, AT2G21330.1, AT5G56350.1, AT3G12780.1, AT1G56190.1, AT3G26650.1, AT5G42740.1	9.6e-05	0.001	Cluster_2
GO:0009620	Biological process	response to fungus	10	0.905797	AT3G21240.1, AT4G01370.1, AT4G16760.1, AT4G23100.1, AT1G49430.1, AT2G39940.1, AT3G45140.1, AT5G42650.1, AT1G05010.1, AT2G22240.1	0.00056	0.0053	Cluster_2
GO:0051171	Biological process	regulation of nitrogen compound metabolic process	10	0.905797	AT1G14900.1, AT3G02060.1, AT5G50920.1, AT5G09250.1, AT5G05610.1, AT3G12130.1, AT2G27040.1, AT5G63980.1, AT4G13940.1, AT4G29190.1	0.043	0.3	Cluster_2
GO:0009408	Biological process	response to heat	9	0.815217	AT5G02500.1, AT5G15450.1, AT2G22240.1, AT4G23100.1, AT5G67030.1, AT1G07890.3, AT3G25230.2, AT5G49910.1, AT3G09440.1	2.5e-09	4.2e-08	Cluster_2
GO:0009165	Biological process	nucleotide biosynthetic process	9	0.815217	ATCG00120.1, AT4G04640.1, AT1G06190.1, AT5G13450.1, AT3G57610.1, ATCG00480.1, AT1G09830.1, AT1G36280.1, AT3G22910.1	1.9e-08	2.8e-07	Cluster_2
GO:0042254	Biological process	ribosome biogenesis	9	0.815217	AT1G02780.1, AT2G40010.1, AT4G25630.1, AT4G11630.1, AT1G32990.1, AT2G36620.1, AT1G09340.1, AT2G34480.1, AT3G44890.1	2.5e-08	3.8e-07	Cluster_2
GO:0042742	Biological process	defense response to bacterium	9	0.815217	AT1G53240.1, AT4G01050.1, AT4G23100.1, AT3G04790.1, AT2G39940.1, AT1G55020.1, AT2G27040.1, AT2G22240.1, AT1G80600.1	3.3e-08	4.9e-07	Cluster_2
GO:0022613	Biological process	ribonucleoprotein complex biogenesis	9	0.815217	AT1G02780.1, AT2G40010.1, AT4G25630.1, AT4G11630.1, AT1G32990.1, AT2G36620.1, AT1G09340.1, AT2G34480.1, AT3G44890.1	3.3e-08	4.9e-07	Cluster_2
GO:0040007	Biological process	growth	9	0.815217	AT1G68530.1, AT2G17420.1, AT4G24190.1, AT1G12840.1, AT5G57020.1, AT1G55020.1, AT5G63980.1, AT2G36850.1, AT3G16640.1	4.3e-06	5.4e-05	Cluster_2
GO:0043648	Biological process	dicarboxylic acid metabolic process	9	0.815217	AT5G66120.2, AT5G11880.1, AT4G39980.1, AT1G22410.1, AT2G29690.1, AT2G45440.1, AT5G54810.1, AT3G53580.1, AT1G48850.1	2e-05	0.00023	Cluster_2
GO:0006007	Biological process	glucose catabolic process	9	0.815217	AT4G38970.1, AT2G29560.1, AT1G42970.1, AT2G21330.1, AT5G56350.1, AT3G12780.1, AT1G56190.1, AT3G26650.1, AT5G42740.1	2.5e-05	0.00029	Cluster_2
GO:0019320	Biological process	hexose catabolic process	9	0.815217	AT4G38970.1, AT2G29560.1, AT1G42970.1, AT2G21330.1, AT5G56350.1, AT3G12780.1, AT1G56190.1, AT3G26650.1, AT5G42740.1	2.8e-05	0.00032	Cluster_2
GO:0046365	Biological process	monosaccharide catabolic process	9	0.815217	AT4G38970.1, AT2G29560.1, AT1G42970.1, AT2G21330.1, AT5G56350.1, AT3G12780.1, AT1G56190.1, AT3G26650.1, AT5G42740.1	2.8e-05	0.00032	Cluster_2
GO:0006006	Biological process	glucose metabolic process	9	0.815217	AT4G38970.1, AT2G29560.1, AT1G42970.1, AT2G21330.1, AT5G56350.1, AT3G12780.1, AT1G56190.1, AT3G26650.1, AT5G42740.1	3.4e-05	0.00039	Cluster_2
GO:0046164	Biological process	alcohol catabolic process	9	0.815217	AT4G38970.1, AT2G29560.1, AT1G42970.1, AT2G21330.1, AT5G56350.1, AT3G12780.1, AT1G56190.1, AT3G26650.1, AT5G42740.1	4.2e-05	0.00047	Cluster_2
GO:0006164	Biological process	purine nucleotide biosynthetic process	9	0.815217	ATCG00120.1, AT4G04640.1, AT1G06190.1, AT5G13450.1, AT3G57610.1, ATCG00480.1, AT1G09830.1, AT1G36280.1, AT3G22910.1	8.3e-05	0.0009	Cluster_2
GO:0006163	Biological process	purine nucleotide metabolic process	9	0.815217	ATCG00120.1, AT4G04640.1, AT1G06190.1, AT5G13450.1, AT3G57610.1, ATCG00480.1, AT1G09830.1, AT1G36280.1, AT3G22910.1	9e-05	0.00098	Cluster_2
GO:0009908	Biological process	flower development	9	0.815217	AT4G24620.1, AT3G13490.1, AT4G23100.1, AT5G52520.1, AT3G57290.1, AT5G64050.1, AT1G11870.2, AT4G31820.1, AT3G04610.1	0.00011	0.0012	Cluster_2
GO:0048519	Biological process	negative regulation of biological process	9	0.815217	AT5G66570.1, AT3G03710.1, AT3G50820.1, AT5G58140.2, AT2G39940.1, AT2G34040.1, AT2G27040.1, AT5G63980.1, AT4G13940.1	0.00015	0.0016	Cluster_2
GO:0009814	Biological process	defense response, incompatible interaction	9	0.815217	AT4G01370.1, AT5G60600.1, AT4G23100.1, AT4G29810.2, AT2G39940.1, AT1G55490.1, AT1G55020.1, AT4G37000.1, AT2G27040.1	0.00035	0.0035	Cluster_2
GO:0044264	Biological process	cellular polysaccharide metabolic process	8	0.724638	AT3G55800.1, AT4G37800.1, AT5G64860.1, AT5G24300.1, AT4G24620.1, AT2G36390.1, AT2G36850.1, AT2G37090.1	5.7e-08	8.3e-07	Cluster_2
GO:0009765	Biological process	photosynthesis, light harvesting	8	0.724638	AT2G47940.1, AT3G27925.1, AT3G61470.1, ATCG00270.1, AT2G34430.1, ATCG00340.1, AT5G39830.1, AT3G54890.1	7.8e-08	1.1e-06	Cluster_2
GO:0043623	Biological process	cellular protein complex assembly	8	0.724638	AT5G66570.1, AT3G50820.1, AT5G35220.1, AT2G25430.1, ATCG00680.1, AT1G79040.1, AT3G26710.1, AT4G32285.1	1.1e-07	1.5e-06	Cluster_2
GO:0006555	Biological process	methionine metabolic process	8	0.724638	AT5G53850.2, AT2G44160.1, AT2G17265.1, AT3G03780.1, AT3G57050.1, AT1G05010.1, AT1G02500.1, AT1G48420.1	6.6e-06	8.1e-05	Cluster_2
GO:0016192	Biological process	vesicle-mediated transport	8	0.724638	AT1G31730.1, AT2G25430.1, AT1G62020.1, AT3G27530.1, AT4G32285.1, AT1G30630.1, AT5G06140.1, AT5G05010.1	0.00021	0.0022	Cluster_2
GO:0009150	Biological process	purine ribonucleotide metabolic process	8	0.724638	ATCG00120.1, AT4G04640.1, AT1G06190.1, AT5G13450.1, AT3G57610.1, ATCG00480.1, AT1G36280.1, AT3G22910.1	0.00021	0.0022	Cluster_2
GO:0006413	Biological process	translational initiation	8	0.724638	AT2G39990.1, AT1G17220.1, AT4G20980.1, AT1G10840.1, AT5G35620.1, AT4G11420.1, AT2G05830.1, AT1G16720.1	0.00021	0.0022	Cluster_2
GO:0048869	Biological process	cellular developmental process	8	0.724638	AT1G68530.1, AT1G12840.1, AT2G26250.1, AT1G18450.1, AT5G63980.1, AT2G36850.1, AT3G16640.1, AT5G42080.1	0.00026	0.0026	Cluster_2
GO:0006397	Biological process	mRNA processing	8	0.724638	AT3G50670.1, AT5G64200.1, AT3G13570.1, AT3G19760.1, AT1G60900.1, AT5G64270.1, AT4G25500.1, AT4G31580.1	0.00046	0.0045	Cluster_2
GO:0009259	Biological process	ribonucleotide metabolic process	8	0.724638	ATCG00120.1, AT4G04640.1, AT1G06190.1, AT5G13450.1, AT3G57610.1, ATCG00480.1, AT1G36280.1, AT3G22910.1	0.00054	0.0052	Cluster_2
GO:0009639	Biological process	response to red or far red light	8	0.724638	AT5G67030.1, AT5G63310.1, AT3G57290.1, AT1G67090.1, AT3G08940.2, AT4G10340.1, AT1G76570.1, AT3G54890.1	0.00067	0.0063	Cluster_2
GO:0006721	Biological process	terpenoid metabolic process	8	0.724638	AT3G03710.1, AT3G63520.1, AT3G10230.1, AT5G67030.1, AT4G14210.1, AT1G63970.1, AT4G32770.1, AT1G06820.1	0.0013	0.012	Cluster_2
GO:0016071	Biological process	mRNA metabolic process	8	0.724638	AT3G50670.1, AT5G64200.1, AT3G13570.1, AT3G19760.1, AT1G60900.1, AT5G64270.1, AT4G25500.1, AT4G31580.1	0.0014	0.013	Cluster_2
GO:0042592	Biological process	homeostatic process	7	0.634058	AT4G04770.1, AT2G17420.1, AT4G35090.1, AT5G42150.1, AT5G06140.1, AT4G04950.1, AT3G16640.1	1.4e-06	1.9e-05	Cluster_2
GO:0000097	Biological process	sulfur amino acid biosynthetic process	7	0.634058	AT5G53850.2, AT2G17265.1, AT2G43750.1, AT3G03780.1, AT3G57050.1, AT3G62030.2, AT1G02500.1	4.7e-06	5.8e-05	Cluster_2
GO:0016265	Biological process	death	7	0.634058	AT4G37980.1, AT4G35090.1, AT4G37930.1, AT1G55490.1, AT4G37000.1, AT2G34040.1, AT4G37990.1	7.1e-06	8.4e-05	Cluster_2
GO:0008219	Biological process	cell death	7	0.634058	AT4G37980.1, AT4G35090.1, AT4G37930.1, AT1G55490.1, AT4G37000.1, AT2G34040.1, AT4G37990.1	7.1e-06	8.4e-05	Cluster_2
GO:0006096	Biological process	glycolysis	7	0.634058	AT2G29560.1, AT1G42970.1, AT5G56350.1, AT3G12780.1, AT1G56190.1, AT3G26650.1, AT5G42740.1	0.00012	0.0012	Cluster_2
GO:0048523	Biological process	negative regulation of cellular process	7	0.634058	AT5G66570.1, AT3G03710.1, AT3G50820.1, AT2G34040.1, AT2G27040.1, AT5G63980.1, AT4G13940.1	0.00013	0.0014	Cluster_2
GO:0043094	Biological process	cellular metabolic compound salvage	7	0.634058	AT5G53850.2, AT2G13360.1, AT2G22780.1, AT4G37930.1, AT5G09660.4, AT5G04140.2, AT1G70580.1	0.00021	0.0022	Cluster_2
GO:0048229	Biological process	gametophyte development	7	0.634058	AT4G16760.1, AT2G36850.1, AT5G52520.1, AT1G74260.1, AT1G72970.1, AT4G34200.1, AT1G18450.1	0.00023	0.0024	Cluster_2
GO:0009888	Biological process	tissue development	7	0.634058	AT5G45390.1, AT4G24190.1, AT1G23010.1, AT2G26250.1, AT1G36160.1, AT3G16640.1, AT5G42080.1	0.00029	0.0028	Cluster_2
GO:0008654	Biological process	phospholipid biosynthetic process	7	0.634058	AT4G15560.1, AT3G03710.1, AT5G60600.1, AT4G34350.1, AT1G63970.1, AT5G16440.1, AT2G22240.1	0.00061	0.0058	Cluster_2
GO:0050793	Biological process	regulation of developmental process	7	0.634058	AT4G24620.1, AT5G45390.1, AT4G24190.1, AT3G04610.1, AT3G48110.1, AT4G31820.1, AT5G63980.1	0.00093	0.0087	Cluster_2
GO:0009152	Biological process	purine ribonucleotide biosynthetic process	7	0.634058	AT4G04640.1, AT1G06190.1, AT5G13450.1, AT3G57610.1, ATCG00480.1, AT1G36280.1, AT3G22910.1	0.00093	0.0087	Cluster_2
GO:0009642	Biological process	response to light intensity	7	0.634058	AT5G66570.1, AT3G50820.1, AT1G73990.1, AT2G47450.1, AT4G32770.1, AT2G22240.1, AT3G62030.2	0.0012	0.011	Cluster_2
GO:0016054	Biological process	organic acid catabolic process	7	0.634058	AT5G09660.4, AT4G16760.1, AT4G33010.1, AT3G24360.1, AT4G12130.1, AT2G22780.1, AT4G37930.1	0.0015	0.013	Cluster_2
GO:0046395	Biological process	carboxylic acid catabolic process	7	0.634058	AT5G09660.4, AT4G16760.1, AT4G33010.1, AT3G24360.1, AT4G12130.1, AT2G22780.1, AT4G37930.1	0.0015	0.013	Cluster_2
GO:0017038	Biological process	protein import	7	0.634058	AT5G16620.1, AT5G50920.1, AT3G63130.1, AT2G28800.1, AT2G47450.1, AT1G27310.1, AT1G06950.1	0.0016	0.014	Cluster_2
GO:0009260	Biological process	ribonucleotide biosynthetic process	7	0.634058	AT4G04640.1, AT1G06190.1, AT5G13450.1, AT3G57610.1, ATCG00480.1, AT1G36280.1, AT3G22910.1	0.0018	0.016	Cluster_2
GO:0006073	Biological process	cellular glucan metabolic process	7	0.634058	AT3G55800.1, AT4G37800.1, AT5G64860.1, AT5G24300.1, AT4G24620.1, AT2G36850.1, AT2G36390.1	0.002	0.017	Cluster_2
GO:0044042	Biological process	glucan metabolic process	7	0.634058	AT3G55800.1, AT4G37800.1, AT5G64860.1, AT5G24300.1, AT4G24620.1, AT2G36850.1, AT2G36390.1	0.0022	0.019	Cluster_2
GO:0006644	Biological process	phospholipid metabolic process	7	0.634058	AT4G15560.1, AT3G03710.1, AT5G60600.1, AT4G34350.1, AT1G63970.1, AT5G16440.1, AT2G22240.1	0.0033	0.027	Cluster_2
GO:0019637	Biological process	organophosphate metabolic process	7	0.634058	AT4G15560.1, AT3G03710.1, AT5G60600.1, AT4G34350.1, AT1G63970.1, AT5G16440.1, AT2G22240.1	0.0047	0.036	Cluster_2
GO:0016044	Biological process	cellular membrane organization	7	0.634058	AT5G35220.1, AT2G25430.1, AT2G28800.1, AT3G10670.1, AT1G03160.1, AT1G55020.1, AT4G32285.1	0.0052	0.041	Cluster_2
GO:0048589	Biological process	developmental growth	6	0.543478	AT1G68530.1, AT4G24190.1, AT1G12840.1, AT5G63980.1, AT2G36850.1, AT3G16640.1	1.7e-05	0.0002	Cluster_2
GO:0006325	Biological process	chromatin organization	6	0.543478	AT2G19480.1, AT3G51880.2, AT5G59970.1, AT2G27040.1, AT4G13940.1, AT1G18450.1	1.7e-05	0.0002	Cluster_2
GO:0051276	Biological process	chromosome organization	6	0.543478	AT2G19480.1, AT3G51880.2, AT5G59970.1, AT2G27040.1, AT4G13940.1, AT1G18450.1	6.9e-05	0.00076	Cluster_2
GO:0009853	Biological process	photorespiration	6	0.543478	AT2G13360.1, AT2G22780.1, AT4G37930.1, AT5G09660.4, AT5G04140.2, AT1G70580.1	0.0002	0.0021	Cluster_2
GO:0022622	Biological process	root system development	6	0.543478	AT5G06140.1, AT1G49430.1, AT1G36160.1, AT1G55020.1, AT1G48630.1, AT3G16640.1	0.00026	0.0026	Cluster_2
GO:0009698	Biological process	phenylpropanoid metabolic process	6	0.543478	AT3G21240.1, AT5G07990.1, AT1G12840.1, AT1G78570.1, AT2G02990.1, AT5G54160.1	0.00026	0.0026	Cluster_2
GO:0048364	Biological process	root development	6	0.543478	AT5G06140.1, AT1G49430.1, AT1G36160.1, AT1G55020.1, AT1G48630.1, AT3G16640.1	0.00026	0.0026	Cluster_2
GO:0046417	Biological process	chorismate metabolic process	6	0.543478	AT5G66120.2, AT4G39980.1, AT1G22410.1, AT2G29690.1, AT5G54810.1, AT1G48850.1	0.00049	0.0047	Cluster_2
GO:0009073	Biological process	aromatic amino acid family biosynthetic process	6	0.543478	AT5G66120.2, AT4G39980.1, AT1G22410.1, AT2G29690.1, AT5G54810.1, AT1G48850.1	0.00049	0.0047	Cluster_2
GO:0051239	Biological process	regulation of multicellular organismal process	6	0.543478	AT5G45390.1, AT4G24190.1, AT4G24620.1, AT3G48110.1, AT4G31820.1, AT3G04610.1	0.00061	0.0058	Cluster_2
GO:0009637	Biological process	response to blue light	6	0.543478	AT5G58140.2, AT1G67090.1, AT3G08940.2, AT4G10340.1, AT1G76570.1, AT3G54890.1	0.001	0.0094	Cluster_2
GO:0009892	Biological process	negative regulation of metabolic process	6	0.543478	AT5G66570.1, AT3G03710.1, AT3G50820.1, AT2G27040.1, AT5G63980.1, AT4G13940.1	0.0011	0.01	Cluster_2
GO:0009072	Biological process	aromatic amino acid family metabolic process	6	0.543478	AT5G66120.2, AT4G39980.1, AT1G22410.1, AT2G29690.1, AT5G54810.1, AT1G48850.1	0.0011	0.01	Cluster_2
GO:0009144	Biological process	purine nucleoside triphosphate metabolic process	6	0.543478	ATCG00120.1, AT4G04640.1, AT1G06190.1, AT5G13450.1, ATCG00480.1, AT3G22910.1	0.0018	0.015	Cluster_2
GO:0009145	Biological process	purine nucleoside triphosphate biosynthetic process	6	0.543478	ATCG00120.1, AT4G04640.1, AT1G06190.1, AT5G13450.1, ATCG00480.1, AT3G22910.1	0.0018	0.015	Cluster_2
GO:0009142	Biological process	nucleoside triphosphate biosynthetic process	6	0.543478	ATCG00120.1, AT4G04640.1, AT1G06190.1, AT5G13450.1, ATCG00480.1, AT3G22910.1	0.0019	0.016	Cluster_2
GO:0009141	Biological process	nucleoside triphosphate metabolic process	6	0.543478	ATCG00120.1, AT4G04640.1, AT1G06190.1, AT5G13450.1, ATCG00480.1, AT3G22910.1	0.0021	0.017	Cluster_2
GO:0009110	Biological process	vitamin biosynthetic process	6	0.543478	AT5G54770.1, AT2G29630.2, AT5G64300.1, AT2G20690.1, AT4G32770.1, AT1G60600.2	0.0022	0.019	Cluster_2
GO:0016114	Biological process	terpenoid biosynthetic process	6	0.543478	AT3G03710.1, AT3G10230.1, AT5G67030.1, AT4G14210.1, AT1G63970.1, AT1G06820.1	0.0064	0.049	Cluster_2
GO:0031324	Biological process	negative regulation of cellular metabolic process	6	0.543478	AT5G66570.1, AT3G03710.1, AT3G50820.1, AT2G27040.1, AT5G63980.1, AT4G13940.1	0.013	0.096	Cluster_2
GO:0006730	Biological process	one-carbon metabolic process	6	0.543478	AT5G05980.1, AT4G25630.1, AT3G52720.1, AT2G27040.1, AT3G23810.1, AT4G13940.1	0.014	0.1	Cluster_2
GO:0006766	Biological process	vitamin metabolic process	6	0.543478	AT5G54770.1, AT2G29630.2, AT5G64300.1, AT2G20690.1, AT4G32770.1, AT1G60600.2	0.014	0.1	Cluster_2
GO:0009991	Biological process	response to extracellular stimulus	6	0.543478	AT1G78380.1, AT2G29630.2, AT1G23010.1, AT4G35090.1, ATCG00420.1, AT2G02990.1	0.017	0.13	Cluster_2
GO:0000271	Biological process	polysaccharide biosynthetic process	6	0.543478	AT1G55850.1, AT3G55800.1, AT5G24300.1, AT2G36390.1, AT2G36850.1, AT2G37090.1	0.02	0.14	Cluster_2
GO:0019253	Biological process	reductive pentose-phosphate cycle	5	0.452899	AT1G42970.1, AT3G04790.1, AT2G21170.1, AT3G55800.1, AT3G26650.1	1.7e-06	2.2e-05	Cluster_2
GO:0009772	Biological process	photosynthetic electron transport in photosystem II	5	0.452899	ATCG00270.1, ATCG01110.1, AT1G60600.2, AT4G04640.1, AT4G09650.1	1.7e-06	2.2e-05	Cluster_2
GO:0019685	Biological process	photosynthesis, dark reaction	5	0.452899	AT1G42970.1, AT3G04790.1, AT2G21170.1, AT3G55800.1, AT3G26650.1	2.8e-06	3.6e-05	Cluster_2
GO:0042214	Biological process	terpene metabolic process	5	0.452899	AT4G14210.1, AT3G10230.1, AT3G03710.1, AT3G63520.1, AT5G67030.1	4.5e-06	5.7e-05	Cluster_2
GO:0009644	Biological process	response to high light intensity	5	0.452899	AT2G47450.1, AT5G66570.1, AT3G50820.1, AT2G22240.1, AT4G32770.1	6.9e-06	8.4e-05	Cluster_2
GO:0019288	Biological process	isopentenyl diphosphate biosynthetic process, mevalonate-independent pathway	5	0.452899	AT5G60600.1, AT3G03710.1, AT4G34350.1, AT1G63970.1, AT4G15560.1	6.9e-06	8.4e-05	Cluster_2
GO:0019682	Biological process	glyceraldehyde-3-phosphate metabolic process	5	0.452899	AT5G60600.1, AT3G03710.1, AT4G34350.1, AT1G63970.1, AT4G15560.1	6.9e-06	8.4e-05	Cluster_2
GO:0010109	Biological process	regulation of photosynthesis	5	0.452899	AT1G55670.1, AT5G66570.1, AT1G68830.1, AT3G50820.1, AT5G52520.1	4.8e-05	0.00054	Cluster_2
GO:0019725	Biological process	cellular homeostasis	5	0.452899	AT4G04950.1, AT2G17420.1, AT5G42150.1, AT4G04770.1, AT4G35090.1	9.9e-05	0.0011	Cluster_2
GO:0012501	Biological process	programmed cell death	5	0.452899	AT2G34040.1, AT4G37930.1, AT4G37980.1, AT4G37990.1, AT4G37000.1	0.00015	0.0016	Cluster_2
GO:0032989	Biological process	cellular component morphogenesis	5	0.452899	AT1G12840.1, AT5G63980.1, AT1G68530.1, AT3G16640.1, AT5G42080.1	0.00059	0.0056	Cluster_2
GO:0034440	Biological process	lipid oxidation	5	0.452899	AT3G24360.1, AT2G22780.1, AT5G09660.4, AT1G72970.1, AT4G16760.1	0.0011	0.01	Cluster_2
GO:0009699	Biological process	phenylpropanoid biosynthetic process	5	0.452899	AT1G78570.1, AT2G02990.1, AT1G12840.1, AT5G07990.1, AT5G54160.1	0.0011	0.01	Cluster_2
GO:0019395	Biological process	fatty acid oxidation	5	0.452899	AT3G24360.1, AT2G22780.1, AT5G09660.4, AT1G72970.1, AT4G16760.1	0.0011	0.01	Cluster_2
GO:0005982	Biological process	starch metabolic process	5	0.452899	AT5G24300.1, AT4G24620.1, AT3G55800.1, AT5G64860.1, AT2G36390.1	0.0011	0.01	Cluster_2
GO:0008361	Biological process	regulation of cell size	5	0.452899	AT2G17420.1, AT1G12840.1, AT5G63980.1, AT1G68530.1, AT3G16640.1	0.0014	0.013	Cluster_2
GO:0016049	Biological process	cell growth	5	0.452899	AT2G17420.1, AT1G12840.1, AT5G63980.1, AT1G68530.1, AT3G16640.1	0.0014	0.013	Cluster_2
GO:0032535	Biological process	regulation of cellular component size	5	0.452899	AT2G17420.1, AT1G12840.1, AT5G63980.1, AT1G68530.1, AT3G16640.1	0.0016	0.014	Cluster_2
GO:0090066	Biological process	regulation of anatomical structure size	5	0.452899	AT2G17420.1, AT1G12840.1, AT5G63980.1, AT1G68530.1, AT3G16640.1	0.0016	0.014	Cluster_2
GO:0000398	Biological process	nuclear mRNA splicing, via spliceosome	5	0.452899	AT4G25500.1, AT5G64200.1, AT3G13570.1, AT3G50670.1, AT4G31580.1	0.0022	0.019	Cluster_2
GO:0030258	Biological process	lipid modification	5	0.452899	AT3G24360.1, AT2G22780.1, AT5G09660.4, AT1G72970.1, AT4G16760.1	0.0022	0.019	Cluster_2
GO:0010817	Biological process	regulation of hormone levels	5	0.452899	AT1G78570.1, AT5G54810.1, AT4G31820.1, AT1G15690.1, AT4G05530.1	0.0025	0.02	Cluster_2
GO:0048518	Biological process	positive regulation of biological process	5	0.452899	AT4G24620.1, AT4G31820.1, AT5G63980.1, AT3G04610.1, AT4G09570.1	0.0027	0.022	Cluster_2
GO:0010218	Biological process	response to far red light	5	0.452899	AT3G08940.2, AT4G10340.1, AT1G76570.1, AT3G54890.1, AT1G67090.1	0.0027	0.022	Cluster_2
GO:0055085	Biological process	transmembrane transport	5	0.452899	AT4G04640.1, ATCG00480.1, AT5G58140.2, AT5G13450.1, AT2G47800.1	0.0036	0.029	Cluster_2
GO:0000375	Biological process	RNA splicing, via transesterification reactions	5	0.452899	AT4G25500.1, AT5G64200.1, AT3G13570.1, AT3G50670.1, AT4G31580.1	0.0036	0.029	Cluster_2
GO:0000377	Biological process	RNA splicing, via transesterification reactions with bulged adenosine as nucleophile	5	0.452899	AT4G25500.1, AT5G64200.1, AT3G13570.1, AT3G50670.1, AT4G31580.1	0.0036	0.029	Cluster_2
GO:0022621	Biological process	shoot system development	5	0.452899	AT4G31820.1, AT1G36160.1, AT5G57020.1, AT1G48630.1, AT5G42080.1	0.0039	0.031	Cluster_2
GO:0048367	Biological process	shoot development	5	0.452899	AT4G31820.1, AT1G36160.1, AT5G57020.1, AT1G48630.1, AT5G42080.1	0.0039	0.031	Cluster_2
GO:0046034	Biological process	ATP metabolic process	5	0.452899	AT1G06190.1, AT4G04640.1, AT5G13450.1, AT3G22910.1, ATCG00480.1	0.0064	0.049	Cluster_2
GO:0000302	Biological process	response to reactive oxygen species	5	0.452899	AT1G07890.3, AT5G63310.1, AT4G35090.1, AT2G22240.1, AT2G41680.1	0.0064	0.049	Cluster_2
GO:0006754	Biological process	ATP biosynthetic process	5	0.452899	AT1G06190.1, AT4G04640.1, AT5G13450.1, AT3G22910.1, ATCG00480.1	0.0064	0.049	Cluster_2
GO:0009199	Biological process	ribonucleoside triphosphate metabolic process	5	0.452899	AT1G06190.1, AT4G04640.1, AT5G13450.1, AT3G22910.1, ATCG00480.1	0.0074	0.055	Cluster_2
GO:0009206	Biological process	purine ribonucleoside triphosphate biosynthetic process	5	0.452899	AT1G06190.1, AT4G04640.1, AT5G13450.1, AT3G22910.1, ATCG00480.1	0.0074	0.055	Cluster_2
GO:0009205	Biological process	purine ribonucleoside triphosphate metabolic process	5	0.452899	AT1G06190.1, AT4G04640.1, AT5G13450.1, AT3G22910.1, ATCG00480.1	0.0074	0.055	Cluster_2
GO:0009201	Biological process	ribonucleoside triphosphate biosynthetic process	5	0.452899	AT1G06190.1, AT4G04640.1, AT5G13450.1, AT3G22910.1, ATCG00480.1	0.0074	0.055	Cluster_2
GO:0010114	Biological process	response to red light	5	0.452899	AT3G08940.2, AT4G10340.1, AT5G67030.1, AT3G54890.1, AT1G67090.1	0.0079	0.059	Cluster_2
GO:0009755	Biological process	hormone-mediated signaling pathway	5	0.452899	AT1G78570.1, AT5G63980.1, AT5G63310.1, AT2G36830.1, AT4G09570.1	0.0098	0.072	Cluster_2
GO:0032870	Biological process	cellular response to hormone stimulus	5	0.452899	AT1G78570.1, AT5G63980.1, AT5G63310.1, AT2G36830.1, AT4G09570.1	0.0098	0.072	Cluster_2
GO:0044242	Biological process	cellular lipid catabolic process	5	0.452899	AT3G24360.1, AT2G22780.1, AT3G63520.1, AT5G09660.4, AT4G16760.1	0.011	0.081	Cluster_2
GO:0016042	Biological process	lipid catabolic process	5	0.452899	AT3G24360.1, AT2G22780.1, AT3G63520.1, AT5G09660.4, AT4G16760.1	0.02	0.14	Cluster_2
GO:0009108	Biological process	coenzyme biosynthetic process	5	0.452899	AT5G49460.1, AT4G23100.1, AT3G07270.1, AT1G60600.2, AT3G16950.2	0.02	0.14	Cluster_2
GO:0010228	Biological process	vegetative to reproductive phase transition of meristem	5	0.452899	AT5G63980.1, AT1G18450.1, AT5G62640.3, AT1G03160.1, AT2G02560.1	0.027	0.19	Cluster_2
GO:0033692	Biological process	cellular polysaccharide biosynthetic process	5	0.452899	AT5G24300.1, AT2G37090.1, AT2G36850.1, AT3G55800.1, AT2G36390.1	0.029	0.21	Cluster_2
GO:0008380	Biological process	RNA splicing	5	0.452899	AT4G25500.1, AT5G64200.1, AT3G13570.1, AT3G50670.1, AT4G31580.1	0.029	0.21	Cluster_2
GO:0031668	Biological process	cellular response to extracellular stimulus	5	0.452899	AT1G78380.1, AT1G23010.1, ATCG00420.1, AT2G02990.1, AT4G35090.1	0.032	0.23	Cluster_2
GO:0031667	Biological process	response to nutrient levels	5	0.452899	AT2G29630.2, AT1G23010.1, ATCG00420.1, AT2G02990.1, AT4G35090.1	0.035	0.25	Cluster_2
GO:0003824	Molecular function	catalytic activity	347	31.4312	ATCG00180.1, AT2G47390.1, AT1G22870.1, AT1G48480.1, AT2G20690.1, AT2G39940.1, AT3G26720.1, AT1G14210.1, AT1G77680.1, AT5G07990.1, AT5G60600.1, AT3G04790.1, AT4G14210.1, AT3G10670.1, AT3G12780.1, AT2G45290.1, AT3G20390.1, AT5G62670.1, AT5G42650.1, AT5G49650.1, AT5G07350.2, AT1G01710.1, AT5G61410.1, AT1G15690.1, AT1G53240.1, AT1G07110.1, AT1G36160.1, AT3G57520.1, AT1G75330.1, AT3G51800.2, AT1G73990…	3.2e-49	2.2e-46	Cluster_2
GO:0005488	Molecular function	binding	233	21.1051	AT5G27640.2, AT2G19480.1, AT1G22870.1, AT1G48480.1, AT5G03340.1, AT2G20690.1, AT5G36110.1, AT2G39940.1, AT5G04130.1, AT1G27310.1, AT1G29930.1, AT5G11770.1, AT3G26720.1, AT3G25230.2, AT1G14210.1, AT4G20360.1, AT3G20320.1, AT3G47470.1, AT1G77680.1, AT5G07990.1, AT3G08940.2, AT5G60600.1, AT5G58140.2, AT3G57290.1, AT3G12915.1, AT1G75690.1, AT3G10670.1, AT1G56340.1, AT1G76100.1, AT1G76570.1, AT1G08410…	0.0012	0.0096	Cluster_2
GO:0016787	Molecular function	hydrolase activity	110	9.96377	AT1G78680.1, AT5G66020.1, AT2G47940.1, AT5G09650.1, AT5G03340.1, AT4G02290.1, AT5G60160.1, AT3G26720.1, AT1G14210.1, AT3G21090.1, AT1G77680.1, AT4G09510.1, AT3G12915.1, AT3G10670.1, AT5G42240.1, AT2G47800.1, AT4G39080.1, AT1G68560.1, AT3G20390.1, AT5G62670.1, AT5G62930.1, AT2G02990.1, AT4G22930.1, AT5G07350.2, AT1G60590.1, AT1G01710.1, AT5G26742.2, AT1G15690.1, AT3G22110.1, AT3G57520.1, AT5G10540…	1.5e-09	4e-08	Cluster_2
GO:0016740	Molecular function	transferase activity	79	7.1558	AT5G13710.1, AT1G73100.1, AT2G13360.1, AT1G31230.1, AT4G32520.1, AT4G01070.1, AT1G55810.1, AT4G26900.1, AT5G58730.1, AT5G57020.1, AT1G22870.1, AT1G48480.1, AT1G74040.1, AT4G09570.1, AT2G20690.1, AT5G63310.1, AT1G22410.1, AT5G17310.2, AT1G01610.1, AT1G75330.1, AT1G32060.1, AT4G15560.1, AT5G08280.1, AT5G47720.2, AT4G12130.1, AT4G31990.3, AT4G35160.1, AT1G55850.1, AT5G56350.1, AT2G26250.1, AT2G22250…	1.3e-24	2.2e-22	Cluster_2
GO:0016491	Molecular function	oxidoreductase activity	70	6.34058	AT3G26650.1, AT3G50820.1, AT3G25530.1, AT1G53240.1, ATCG01110.1, AT5G48440.1, AT4G33010.1, AT1G23740.1, AT1G59960.1, AT5G67590.1, AT1G80560.1, AT5G04140.2, AT5G20630.1, AT5G11770.1, AT1G03475.1, AT3G16950.2, ATMG00510.1, AT2G44160.1, AT5G07990.1, AT5G08410.1, AT1G05010.1, AT5G60600.1, AT3G54660.1, AT4G34350.1, AT1G17650.1, AT4G35090.1, ATCG00420.1, AT4G14210.1, AT2G22780.1, AT5G42150.1, AT5G50850…	2.2e-30	7.4e-28	Cluster_2
GO:0000166	Molecular function	nucleotide binding	61	5.52536	AT1G72550.1, AT1G45332.1, AT4G09320.1, AT2G28260.1, AT1G48480.1, AT4G39280.1, AT5G03340.1, AT5G26830.1, AT1G56050.1, AT5G42080.1, AT3G53390.1, AT2G05830.1, AT5G04130.1, AT4G00660.2, AT1G29880.1, AT3G13490.1, AT2G19940.1, AT5G15450.1, AT3G18190.1, AT5G52520.1, AT1G60650.1, AT3G12915.1, AT4G10320.1, AT5G56000.1, AT5G58140.2, AT1G48630.1, AT1G56140.1, AT3G02660.1, AT3G58140.1, AT1G72970.1, AT1G08410…	0.00083	0.0072	Cluster_2
GO:0003735	Molecular function	structural constituent of ribosome	58	5.25362	AT1G07320.1, AT5G40950.1, AT1G02780.1, AT3G58660.1, AT5G61170.1, AT3G05590.1, AT5G02960.1, AT5G23740.1, AT1G78630.1, AT2G42740.1, AT4G09800.1, AT3G06180.1, AT3G62870.1, AT5G59850.1, AT5G39850.1, AT1G05190.1, AT3G60770.1, ATCG00380.1, AT5G10360.1, AT1G27400.1, AT3G25920.1, AT1G43170.1, AT3G44890.1, AT1G79850.1, AT1G32990.1, AT5G04800.1, AT1G74060.1, AT4G01310.1, AT3G09630.1, AT5G27770.1, AT4G39200…	1.5e-28	3.3e-26	Cluster_2
GO:0005515	Molecular function	protein binding	55	4.98188	AT4G15040.1, AT3G26650.1, AT3G19760.1, AT5G05610.1, AT2G28260.1, AT5G23120.1, AT2G41740.1, AT5G63310.1, AT2G39940.1, AT1G27310.1, AT3G06480.1, AT2G47110.1, AT4G31580.1, AT1G31730.1, AT2G19940.1, AT3G10670.1, AT1G05520.1, AT2G25430.1, AT4G35160.1, AT2G28800.1, AT1G75690.1, AT1G30630.1, AT5G56000.1, AT5G09250.1, AT1G56140.1, AT4G30020.1, AT5G24020.1, AT4G04770.1, AT1G10630.1, AT5G54770.1, AT1G78870…	1.7e-10	5.2e-09	Cluster_2
GO:0017076	Molecular function	purine nucleotide binding	50	4.52899	AT1G45332.1, AT4G09320.1, AT1G22870.1, AT1G48480.1, AT4G39280.1, AT5G03340.1, AT5G26830.1, AT1G56050.1, AT5G63310.1, AT2G05830.1, AT5G04130.1, AT4G00660.2, AT1G29880.1, AT3G13490.1, AT1G06190.1, AT5G15450.1, AT3G18190.1, AT5G52520.1, AT3G12915.1, AT4G10320.1, AT5G56000.1, AT1G56140.1, AT3G02660.1, AT3G58140.1, AT1G72970.1, AT1G08410.1, AT1G10630.1, AT5G05000.2, AT5G50920.1, AT4G24190.1, AT1G32060…	2.1e-10	6e-09	Cluster_2
GO:0032555	Molecular function	purine ribonucleotide binding	49	4.43841	AT1G45332.1, AT4G09320.1, AT1G22870.1, AT1G48480.1, AT4G39280.1, AT5G03340.1, AT5G26830.1, AT1G56050.1, AT5G63310.1, AT2G05830.1, AT5G04130.1, AT4G00660.2, AT1G29880.1, AT3G13490.1, AT1G06190.1, AT5G15450.1, AT3G18190.1, AT5G52520.1, AT3G12915.1, AT4G10320.1, AT5G56000.1, AT1G56140.1, AT3G02660.1, AT3G58140.1, AT1G08410.1, AT1G10630.1, AT5G05000.2, AT5G50920.1, AT4G24190.1, AT1G32060.1, AT1G29900…	5.9e-10	1.6e-08	Cluster_2
GO:0032553	Molecular function	ribonucleotide binding	49	4.43841	AT1G45332.1, AT4G09320.1, AT1G22870.1, AT1G48480.1, AT4G39280.1, AT5G03340.1, AT5G26830.1, AT1G56050.1, AT5G63310.1, AT2G05830.1, AT5G04130.1, AT4G00660.2, AT1G29880.1, AT3G13490.1, AT1G06190.1, AT5G15450.1, AT3G18190.1, AT5G52520.1, AT3G12915.1, AT4G10320.1, AT5G56000.1, AT1G56140.1, AT3G02660.1, AT3G58140.1, AT1G08410.1, AT1G10630.1, AT5G05000.2, AT5G50920.1, AT4G24190.1, AT1G32060.1, AT1G29900…	5.9e-10	1.6e-08	Cluster_2
GO:0001883	Molecular function	purine nucleoside binding	40	3.62319	AT1G45332.1, AT4G09320.1, AT1G22870.1, AT1G48480.1, AT4G39280.1, AT5G03340.1, AT5G26830.1, AT5G63310.1, AT5G04130.1, AT4G00660.2, AT1G29880.1, AT3G13490.1, AT1G06190.1, AT5G15450.1, AT3G18190.1, AT5G52520.1, AT4G10320.1, AT5G56000.1, AT1G56140.1, AT3G02660.1, AT3G58140.1, AT1G72970.1, AT5G50920.1, AT4G24190.1, AT1G32060.1, AT1G29900.1, AT2G03270.1, AT5G16715.1, AT1G55810.1, AT3G06480.1, AT5G10470…	8.4e-09	1.9e-07	Cluster_2
GO:0001882	Molecular function	nucleoside binding	40	3.62319	AT1G45332.1, AT4G09320.1, AT1G22870.1, AT1G48480.1, AT4G39280.1, AT5G03340.1, AT5G26830.1, AT5G63310.1, AT5G04130.1, AT4G00660.2, AT1G29880.1, AT3G13490.1, AT1G06190.1, AT5G15450.1, AT3G18190.1, AT5G52520.1, AT4G10320.1, AT5G56000.1, AT1G56140.1, AT3G02660.1, AT3G58140.1, AT1G72970.1, AT5G50920.1, AT4G24190.1, AT1G32060.1, AT1G29900.1, AT2G03270.1, AT5G16715.1, AT1G55810.1, AT3G06480.1, AT5G10470…	8.4e-09	1.9e-07	Cluster_2
GO:0030554	Molecular function	adenyl nucleotide binding	40	3.62319	AT1G45332.1, AT4G09320.1, AT1G22870.1, AT1G48480.1, AT4G39280.1, AT5G03340.1, AT5G26830.1, AT5G63310.1, AT5G04130.1, AT4G00660.2, AT1G29880.1, AT3G13490.1, AT1G06190.1, AT5G15450.1, AT3G18190.1, AT5G52520.1, AT4G10320.1, AT5G56000.1, AT1G56140.1, AT3G02660.1, AT3G58140.1, AT1G72970.1, AT5G50920.1, AT4G24190.1, AT1G32060.1, AT1G29900.1, AT2G03270.1, AT5G16715.1, AT1G55810.1, AT3G06480.1, AT5G10470…	8.4e-09	1.9e-07	Cluster_2
GO:0032559	Molecular function	adenyl ribonucleotide binding	39	3.53261	AT1G45332.1, AT4G09320.1, AT1G22870.1, AT1G48480.1, AT4G39280.1, AT5G03340.1, AT5G26830.1, AT5G63310.1, AT5G04130.1, AT4G00660.2, AT1G29880.1, AT3G13490.1, AT1G06190.1, AT5G15450.1, AT3G18190.1, AT5G52520.1, AT4G10320.1, AT5G56000.1, AT1G56140.1, AT3G02660.1, AT3G58140.1, AT5G50920.1, AT4G24190.1, AT1G32060.1, AT1G29900.1, AT2G03270.1, AT5G16715.1, AT1G55810.1, AT3G06480.1, AT5G10470.2, AT3G09440…	2.4e-08	5.2e-07	Cluster_2
GO:0005524	Molecular function	ATP binding	38	3.44203	AT1G45332.1, AT4G09320.1, AT1G22870.1, AT1G48480.1, AT4G39280.1, AT5G03340.1, AT5G26830.1, AT5G63310.1, AT5G04130.1, AT4G00660.2, AT1G29880.1, AT3G13490.1, AT1G06190.1, AT5G15450.1, AT3G18190.1, AT5G52520.1, AT4G10320.1, AT5G56000.1, AT1G56140.1, AT3G02660.1, AT3G58140.1, AT5G50920.1, AT4G24190.1, AT1G32060.1, AT1G29900.1, AT2G03270.1, AT5G16715.1, AT1G55810.1, AT3G06480.1, AT5G10470.2, AT3G09440…	7e-08	1.3e-06	Cluster_2
GO:0005215	Molecular function	transporter activity	34	3.07971	ATCG00120.1, AT1G62020.1, AT5G13450.1, AT2G28260.1, AT5G13490.1, AT1G27310.1, AT5G64940.1, AT5G12860.1, AT3G21090.1, AT1G06190.1, AT3G10670.1, AT1G05520.1, AT2G28800.1, AT1G30630.1, AT4G39460.1, AT4G04770.1, AT3G20320.1, AT2G26900.1, AT3G22910.1, AT2G36830.1, AT1G52190.1, AT1G12840.1, ATCG00480.1, AT1G10390.1, AT3G26570.1, AT1G80230.1, AT4G25450.1, AT2G47800.1, AT1G64550.1, AT5G60790.1, AT5G33320…	1.2e-10	4.3e-09	Cluster_2
GO:0016462	Molecular function	pyrophosphatase activity	34	3.07971	ATCG00120.1, AT5G09650.1, AT1G06430.1, AT5G03340.1, AT1G17470.1, AT4G00660.2, AT5G10470.2, AT3G21090.1, AT2G03270.1, AT1G06190.1, AT5G15450.1, AT3G19760.1, AT3G12915.1, AT3G10670.1, AT1G07510.1, AT2G47800.1, AT4G39080.1, AT5G24020.1, AT4G04770.1, AT3G22910.1, AT5G50920.1, AT1G12840.1, AT5G62670.1, AT1G30540.1, AT3G06480.1, AT4G25450.1, AT5G42080.1, AT3G02060.1, AT1G54270.1, AT2G29630.2, AT5G42270…	1.9e-05	0.00021	Cluster_2
GO:0016818	Molecular function	hydrolase activity, acting on acid anhydrides, in phosphorus-containing anhydrides	34	3.07971	ATCG00120.1, AT5G09650.1, AT1G06430.1, AT5G03340.1, AT1G17470.1, AT4G00660.2, AT5G10470.2, AT3G21090.1, AT2G03270.1, AT1G06190.1, AT5G15450.1, AT3G19760.1, AT3G12915.1, AT3G10670.1, AT1G07510.1, AT2G47800.1, AT4G39080.1, AT5G24020.1, AT4G04770.1, AT3G22910.1, AT5G50920.1, AT1G12840.1, AT5G62670.1, AT1G30540.1, AT3G06480.1, AT4G25450.1, AT5G42080.1, AT3G02060.1, AT1G54270.1, AT2G29630.2, AT5G42270…	2e-05	0.00023	Cluster_2
GO:0016817	Molecular function	hydrolase activity, acting on acid anhydrides	34	3.07971	ATCG00120.1, AT5G09650.1, AT1G06430.1, AT5G03340.1, AT1G17470.1, AT4G00660.2, AT5G10470.2, AT3G21090.1, AT2G03270.1, AT1G06190.1, AT5G15450.1, AT3G19760.1, AT3G12915.1, AT3G10670.1, AT1G07510.1, AT2G47800.1, AT4G39080.1, AT5G24020.1, AT4G04770.1, AT3G22910.1, AT5G50920.1, AT1G12840.1, AT5G62670.1, AT1G30540.1, AT3G06480.1, AT4G25450.1, AT5G42080.1, AT3G02060.1, AT1G54270.1, AT2G29630.2, AT5G42270…	2.1e-05	0.00024	Cluster_2
GO:0016874	Molecular function	ligase activity	33	2.98913	AT3G57610.1, AT3G21240.1, AT1G29900.1, AT4G39280.1, AT5G26830.1, AT1G11870.2, AT1G36160.1, AT5G05980.1, AT5G13630.1, AT1G29880.1, AT3G13490.1, AT5G52520.1, AT5G06460.1, AT4G10320.1, AT3G48110.1, AT5G35630.1, AT3G02660.1, AT3G58140.1, AT1G48520.1, AT1G78870.1, AT4G23100.1, AT1G49430.1, AT1G74260.1, AT5G16715.1, AT1G09830.1, AT2G38040.1, AT3G04600.1, ATCG00500.1, AT3G27740.1, AT5G64050.1, AT1G14610…	1.6e-09	4e-08	Cluster_2
GO:0017111	Molecular function	nucleoside-triphosphatase activity	32	2.89855	ATCG00120.1, AT1G06430.1, AT5G03340.1, AT1G17470.1, AT4G00660.2, AT5G10470.2, AT3G21090.1, AT2G03270.1, AT1G06190.1, AT5G15450.1, AT3G19760.1, AT3G12915.1, AT3G10670.1, AT1G07510.1, AT2G47800.1, AT4G39080.1, AT5G24020.1, AT4G04770.1, AT3G22910.1, AT5G50920.1, AT1G12840.1, AT5G62670.1, AT1G30540.1, AT3G06480.1, AT4G25450.1, AT5G42080.1, AT3G02060.1, AT1G54270.1, AT5G42270.1, AT1G76820.1, AT5G26742…	4.7e-05	0.00049	Cluster_2
GO:0046872	Molecular function	metal ion binding	31	2.80797	AT1G23740.1, AT4G30920.1, AT1G60650.1, AT3G44750.1, AT1G06430.1, AT1G67280.1, AT5G60160.1, AT5G17170.1, AT3G26720.1, AT5G40810.1, AT5G53850.2, AT1G05520.1, AT1G62810.1, AT4G19190.1, AT5G53870.1, AT1G56340.1, AT5G42390.1, AT1G76100.1, AT3G58140.1, AT5G13440.1, AT1G08450.1, AT4G33420.1, AT2G42590.3, AT3G01500.2, AT5G03740.1, AT2G35840.1, AT5G14740.1, AT1G23010.1, AT5G56350.1, AT1G72550.1, AT3G52720…	4.1e-12	2.3e-10	Cluster_2
GO:0043167	Molecular function	ion binding	31	2.80797	AT1G23740.1, AT4G30920.1, AT1G60650.1, AT3G44750.1, AT1G06430.1, AT1G67280.1, AT5G60160.1, AT5G17170.1, AT3G26720.1, AT5G40810.1, AT5G53850.2, AT1G05520.1, AT1G62810.1, AT4G19190.1, AT5G53870.1, AT1G56340.1, AT5G42390.1, AT1G76100.1, AT3G58140.1, AT5G13440.1, AT1G08450.1, AT4G33420.1, AT2G42590.3, AT3G01500.2, AT5G03740.1, AT2G35840.1, AT5G14740.1, AT1G23010.1, AT5G56350.1, AT1G72550.1, AT3G52720…	8.2e-12	4e-10	Cluster_2
GO:0043169	Molecular function	cation binding	31	2.80797	AT1G23740.1, AT4G30920.1, AT1G60650.1, AT3G44750.1, AT1G06430.1, AT1G67280.1, AT5G60160.1, AT5G17170.1, AT3G26720.1, AT5G40810.1, AT5G53850.2, AT1G05520.1, AT1G62810.1, AT4G19190.1, AT5G53870.1, AT1G56340.1, AT5G42390.1, AT1G76100.1, AT3G58140.1, AT5G13440.1, AT1G08450.1, AT4G33420.1, AT2G42590.3, AT3G01500.2, AT5G03740.1, AT2G35840.1, AT5G14740.1, AT1G23010.1, AT5G56350.1, AT1G72550.1, AT3G52720…	8.2e-12	4e-10	Cluster_2
GO:0008233	Molecular function	peptidase activity	29	2.62681	AT1G78680.1, AT4G15040.1, AT2G47940.1, AT4G30920.1, AT3G22110.1, AT1G06430.1, AT5G10540.1, AT5G60160.1, AT3G02090.2, AT3G51800.2, AT1G73990.1, AT3G12203.1, AT5G42390.1, AT5G39830.1, AT4G30020.1, AT5G50920.1, AT1G25510.1, AT5G51740.1, AT1G51760.1, AT5G42240.1, AT2G47390.1, AT3G19170.1, AT3G27925.1, AT5G35220.1, AT5G05740.1, AT5G42270.1, AT5G06600.1, AT5G23210.1, AT4G12910.1	9.5e-06	0.00012	Cluster_2
GO:0016829	Molecular function	lyase activity	28	2.53623	AT2G43750.1, AT3G01500.2, AT2G29690.1, AT3G57050.1, AT1G80160.1, AT2G29560.1, AT5G64300.1, AT3G23940.1, AT1G63970.1, AT1G72970.1, AT1G48420.1, AT5G11880.1, AT4G13430.1, AT5G42650.1, AT1G67090.1, AT5G66120.2, AT1G69740.1, AT1G08200.1, AT1G36280.1, AT5G14740.1, ATCG00490.1, AT1G43710.1, AT1G78570.1, AT2G45440.1, AT3G14930.1, AT1G67280.1, AT5G54810.1, AT3G52720.1	1.4e-22	1.8e-20	Cluster_2
GO:0070011	Molecular function	peptidase activity, acting on L-amino acid peptides	28	2.53623	AT1G78680.1, AT4G15040.1, AT2G47940.1, AT4G30920.1, AT1G06430.1, AT5G10540.1, AT5G60160.1, AT3G02090.2, AT3G51800.2, AT1G73990.1, AT3G12203.1, AT5G42390.1, AT5G39830.1, AT4G30020.1, AT5G50920.1, AT1G25510.1, AT5G51740.1, AT1G51760.1, AT5G42240.1, AT2G47390.1, AT3G19170.1, AT3G27925.1, AT5G35220.1, AT5G05740.1, AT5G42270.1, AT5G06600.1, AT5G23210.1, AT4G12910.1	4.2e-06	5.7e-05	Cluster_2
GO:0003723	Molecular function	RNA binding	27	2.44565	AT1G07320.1, AT3G50820.1, AT1G60650.1, AT4G17520.1, AT5G35620.1, AT4G24770.1, AT1G06680.1, AT3G58660.1, AT1G14210.1, AT3G03710.1, AT1G77680.1, AT4G25630.1, AT4G25500.1, AT3G58140.1, AT5G66570.1, AT5G30510.1, AT1G60900.1, AT1G14650.1, AT1G71720.1, AT4G37930.1, AT3G52380.1, AT3G50670.1, AT3G13570.1, AT5G64200.1, AT1G72550.1, AT1G64880.1, AT4G14300.1	0.013	0.095	Cluster_2
GO:0016887	Molecular function	ATPase activity	26	2.35507	ATCG00120.1, AT1G06430.1, AT5G03340.1, AT4G00660.2, AT3G21090.1, AT1G06190.1, AT5G15450.1, AT3G19760.1, AT3G10670.1, AT1G07510.1, AT3G02060.1, AT4G39080.1, AT5G24020.1, AT4G04770.1, AT3G22910.1, AT5G50920.1, AT1G12840.1, AT5G62670.1, AT1G30540.1, AT3G06480.1, AT4G25450.1, AT2G47800.1, AT1G54270.1, AT5G42270.1, AT5G26742.2, AT1G15690.1	9.6e-21	1.1e-18	Cluster_2
GO:0016772	Molecular function	transferase activity, transferring phosphorus-containing groups	26	2.35507	AT5G58730.1, AT1G22870.1, AT1G48480.1, AT4G09570.1, AT5G63310.1, AT5G17310.2, AT5G58140.2, AT3G12780.1, AT1G56190.1, AT1G56140.1, AT4G35360.1, AT4G09320.1, AT1G32060.1, AT1G31230.1, AT1G19920.1, ATCG00180.1, AT1G55810.1, AT4G04720.1, AT5G49650.1, AT5G19220.1, AT4G01370.1, AT2G17265.1, AT3G57560.1, AT4G29810.2, AT5G56350.1, AT1G68830.1	1e-05	0.00012	Cluster_2
GO:0016853	Molecular function	isomerase activity	25	2.26449	AT1G04980.1, AT2G21170.1, AT5G04130.1, AT2G22240.1, AT2G43560.1, AT3G10230.1, AT3G53580.1, AT3G04790.1, AT5G16440.1, AT4G33060.1, AT3G16110.1, AT3G25230.2, AT5G19370.1, AT3G01480.1, AT1G06820.1, AT1G30620.1, AT3G56070.1, AT5G55220.1, AT4G39710.1, AT4G24620.1, AT5G61410.1, AT3G48730.1, AT5G42740.1, AT3G62030.2, AT3G10690.1	1.5e-19	1.5e-17	Cluster_2
GO:0016301	Molecular function	kinase activity	22	1.99275	AT5G58730.1, AT1G22870.1, AT1G48480.1, AT4G09570.1, AT5G63310.1, AT5G58140.2, AT3G12780.1, AT1G56190.1, AT1G56140.1, AT4G35360.1, AT4G09320.1, AT1G32060.1, AT1G31230.1, AT1G55810.1, AT4G04720.1, AT5G49650.1, AT4G01370.1, AT2G17265.1, AT3G57560.1, AT4G29810.2, AT5G56350.1, AT1G68830.1	0.00018	0.0017	Cluster_2
GO:0008135	Molecular function	translation factor activity, nucleic acid binding	21	1.90217	AT5G36170.1, AT4G29060.1, AT1G45332.1, AT5G27640.2, AT2G39990.1, AT3G08740.1, AT3G56150.1, AT1G54270.1, AT1G10840.1, AT5G35620.1, AT3G57290.1, AT2G47020.1, AT4G11420.1, AT4G33250.1, AT3G26400.1, AT2G05830.1, AT4G20980.1, AT1G17220.1, AT4G20360.1, AT1G09640.1, AT5G60390.1	8e-15	6e-13	Cluster_2
GO:0046914	Molecular function	transition metal ion binding	20	1.81159	AT4G33420.1, AT1G23740.1, AT5G14740.1, AT4G30920.1, AT1G05520.1, AT1G60650.1, AT3G44750.1, AT1G23010.1, AT1G06430.1, AT4G19190.1, AT1G62810.1, AT5G53870.1, AT3G01500.2, AT5G42390.1, AT5G60160.1, AT1G76100.1, AT3G26720.1, AT5G03740.1, AT3G52720.1, AT5G40810.1	3.5e-08	7.1e-07	Cluster_2
GO:0042623	Molecular function	ATPase activity, coupled	19	1.72101	ATCG00120.1, AT3G21090.1, AT5G26742.2, AT1G06190.1, AT3G02060.1, AT5G50920.1, AT1G12840.1, AT1G54270.1, AT3G19760.1, AT1G06430.1, AT3G10670.1, AT5G42270.1, AT3G22910.1, AT3G06480.1, AT4G25450.1, AT4G00660.2, AT5G24020.1, AT4G04770.1, AT2G47800.1	1.3e-15	1.1e-13	Cluster_2
GO:0016168	Molecular function	chlorophyll binding	15	1.3587	AT3G08940.2, AT3G47470.1, AT1G61520.1, ATCG00340.1, ATCG00280.1, AT3G61470.1, AT2G34430.1, ATCG00680.1, AT2G05070.1, AT4G10340.1, AT1G15820.1, AT1G29930.1, ATCG00020.1, AT1G76570.1, AT3G54890.1	2.4e-14	1.6e-12	Cluster_2
GO:0004812	Molecular function	aminoacyl-tRNA ligase activity	15	1.3587	AT1G29880.1, AT5G64050.1, AT3G13490.1, AT3G48110.1, AT3G04600.1, AT5G52520.1, AT4G39280.1, AT1G14610.1, AT5G26830.1, AT1G11870.2, AT1G72550.1, AT5G16715.1, AT3G02660.1, AT3G58140.1, AT4G10320.1	1.3e-10	4.3e-09	Cluster_2
GO:0016875	Molecular function	ligase activity, forming carbon-oxygen bonds	15	1.3587	AT1G29880.1, AT5G64050.1, AT3G13490.1, AT3G48110.1, AT3G04600.1, AT5G52520.1, AT4G39280.1, AT1G14610.1, AT5G26830.1, AT1G11870.2, AT1G72550.1, AT5G16715.1, AT3G02660.1, AT3G58140.1, AT4G10320.1	1.3e-10	4.3e-09	Cluster_2
GO:0016876	Molecular function	ligase activity, forming aminoacyl-tRNA and related compounds	15	1.3587	AT1G29880.1, AT5G64050.1, AT3G13490.1, AT3G48110.1, AT3G04600.1, AT5G52520.1, AT4G39280.1, AT1G14610.1, AT5G26830.1, AT1G11870.2, AT1G72550.1, AT5G16715.1, AT3G02660.1, AT3G58140.1, AT4G10320.1	1.3e-10	4.3e-09	Cluster_2
GO:0004175	Molecular function	endopeptidase activity	14	1.26812	AT3G02090.2, AT3G19170.1, AT2G47390.1, AT2G47940.1, AT3G27925.1, AT1G73990.1, AT5G42390.1, AT4G15040.1, AT1G25510.1, AT5G05740.1, AT5G51740.1, AT5G35220.1, AT5G10540.1, AT4G30020.1	3.2e-12	2e-10	Cluster_2
GO:0015399	Molecular function	primary active transmembrane transporter activity	13	1.17754	ATCG00120.1, AT3G21090.1, AT1G06190.1, AT1G12840.1, AT2G28800.1, AT2G18710.1, AT3G10670.1, AT5G28750.1, AT4G04770.1, AT3G22910.1, AT4G25450.1, AT1G15690.1, AT2G47800.1	1.1e-10	4.3e-09	Cluster_2
GO:0015405	Molecular function	P-P-bond-hydrolysis-driven transmembrane transporter activity	13	1.17754	ATCG00120.1, AT3G21090.1, AT1G06190.1, AT1G12840.1, AT2G28800.1, AT2G18710.1, AT3G10670.1, AT5G28750.1, AT4G04770.1, AT3G22910.1, AT4G25450.1, AT1G15690.1, AT2G47800.1	1.1e-10	4.3e-09	Cluster_2
GO:0003743	Molecular function	translation initiation factor activity	13	1.17754	AT4G20980.1, AT5G27640.2, AT2G39990.1, AT1G17220.1, AT3G56150.1, AT1G54270.1, AT1G10840.1, AT5G35620.1, AT3G57290.1, AT4G11420.1, AT3G26400.1, AT2G05830.1, AT4G33250.1	2.3e-07	4.1e-06	Cluster_2
GO:0008270	Molecular function	zinc ion binding	13	1.17754	AT1G23740.1, AT5G14740.1, AT4G19190.1, AT1G05520.1, AT1G60650.1, AT3G44750.1, AT1G06430.1, AT3G01500.2, AT5G42390.1, AT5G60160.1, AT3G26720.1, AT5G03740.1, AT3G52720.1	8.1e-05	0.00079	Cluster_2
GO:0016746	Molecular function	transferase activity, transferring acyl groups	13	1.17754	AT2G30200.1, AT5G13640.1, AT1G03495.1, AT2G28630.1, AT3G06850.1, AT1G62640.1, AT5G57020.1, AT1G74040.1, AT1G01610.1, AT5G47720.2, AT5G49460.1, AT2G26250.1, AT5G56740.1	0.0056	0.042	Cluster_2
GO:0016835	Molecular function	carbon-oxygen lyase activity	12	1.08696	AT5G66120.2, AT5G54810.1, AT3G01500.2, AT5G14740.1, AT2G29560.1, AT2G43750.1, AT3G23940.1, AT1G78570.1, AT2G45440.1, AT5G42650.1, AT1G69740.1, AT3G52720.1	1.1e-11	5e-10	Cluster_2
GO:0008237	Molecular function	metallopeptidase activity	12	1.08696	AT3G19170.1, AT3G51800.2, AT4G30920.1, AT5G35220.1, AT1G06430.1, AT5G05740.1, AT1G51760.1, AT5G51740.1, AT5G42270.1, AT5G42390.1, AT5G10540.1, AT3G02090.2	1.7e-07	3.1e-06	Cluster_2
GO:0009055	Molecular function	electron carrier activity	12	1.08696	AT4G25650.2, ATCG00270.1, AT1G15140.1, AT4G03280.1, ATCG00540.1, AT4G33420.1, AT1G71500.1, AT5G42150.1, AT5G53870.1, AT4G04950.1, AT2G27510.1, AT5G40810.1	0.015	0.1	Cluster_2
GO:0016791	Molecular function	phosphatase activity	12	1.08696	AT5G66020.1, AT5G53850.2, AT2G35840.1, AT1G31190.1, AT3G55800.1, AT5G36700.1, AT3G54050.1, AT1G07110.1, AT3G58500.1, AT5G63980.1, AT3G01510.1, AT4G28400.1	0.031	0.21	Cluster_2
GO:0016741	Molecular function	transferase activity, transferring one-carbon groups	11	0.996377	AT5G13710.1, AT1G73100.1, AT4G25080.3, AT4G12130.1, AT4G35160.1, AT4G37930.1, AT3G03780.1, AT1G73600.2, AT4G32520.1, AT1G75330.1, AT5G54160.1	2.3e-07	4.1e-06	Cluster_2
GO:0016614	Molecular function	oxidoreductase activity, acting on CH-OH group of donors	11	0.996377	AT5G09660.4, AT3G25530.1, AT1G72190.1, AT1G53240.1, AT1G17650.1, AT2G22780.1, AT1G31230.1, AT1G80560.1, AT3G47520.1, AT3G58610.1, AT4G37990.1	0.00051	0.0046	Cluster_2
GO:0017171	Molecular function	serine hydrolase activity	11	0.996377	AT4G15040.1, AT2G47940.1, AT3G27925.1, AT1G73990.1, AT2G47390.1, AT3G12203.1, AT5G42240.1, AT5G39830.1, AT4G30020.1, AT5G23210.1, AT4G12910.1	0.00077	0.0068	Cluster_2
GO:0008236	Molecular function	serine-type peptidase activity	11	0.996377	AT4G15040.1, AT2G47940.1, AT3G27925.1, AT1G73990.1, AT2G47390.1, AT3G12203.1, AT5G42240.1, AT5G39830.1, AT4G30020.1, AT5G23210.1, AT4G12910.1	0.00077	0.0068	Cluster_2
GO:0016747	Molecular function	transferase activity, transferring acyl groups other than amino-acyl groups	11	0.996377	AT2G30200.1, AT5G13640.1, AT1G03495.1, AT2G28630.1, AT3G06850.1, AT1G62640.1, AT5G57020.1, AT1G01610.1, AT5G47720.2, AT2G26250.1, AT5G56740.1	0.015	0.1	Cluster_2
GO:0008415	Molecular function	acyltransferase activity	10	0.905797	AT2G30200.1, AT5G13640.1, AT2G28630.1, AT3G06850.1, AT1G62640.1, AT5G57020.1, AT1G01610.1, AT5G47720.2, AT2G26250.1, AT5G56740.1	2.8e-07	4.6e-06	Cluster_2
GO:0008168	Molecular function	methyltransferase activity	10	0.905797	AT5G13710.1, AT1G73100.1, AT4G25080.3, AT4G12130.1, AT4G35160.1, AT4G37930.1, AT3G03780.1, AT1G73600.2, AT4G32520.1, AT5G54160.1	1.5e-06	2.3e-05	Cluster_2
GO:0016836	Molecular function	hydro-lyase activity	10	0.905797	AT5G54810.1, AT3G01500.2, AT5G14740.1, AT2G29560.1, AT3G23940.1, AT1G78570.1, AT2G45440.1, AT5G42650.1, AT1G69740.1, AT3G52720.1	6.1e-06	8.2e-05	Cluster_2
GO:0016651	Molecular function	oxidoreductase activity, acting on NADH or NADPH	10	0.905797	AT3G54660.1, AT2G17420.1, ATCG01110.1, ATCG00420.1, ATMG00510.1, AT5G67590.1, AT5G11770.1, AT2G41680.1, AT3G16950.2, AT1G03630.1	3.2e-05	0.00034	Cluster_2
GO:0019001	Molecular function	guanyl nucleotide binding	10	0.905797	AT5G05000.2, AT1G08410.1, AT3G12915.1, AT1G56050.1, AT2G05830.1, AT2G44610.1, AT1G17470.1, AT1G76820.1, AT1G10630.1, AT5G42080.1	0.013	0.096	Cluster_2
GO:0032561	Molecular function	guanyl ribonucleotide binding	10	0.905797	AT5G05000.2, AT1G08410.1, AT3G12915.1, AT1G56050.1, AT2G05830.1, AT2G44610.1, AT1G17470.1, AT1G76820.1, AT1G10630.1, AT5G42080.1	0.013	0.096	Cluster_2
GO:0005525	Molecular function	GTP binding	10	0.905797	AT5G05000.2, AT1G08410.1, AT3G12915.1, AT1G56050.1, AT2G05830.1, AT2G44610.1, AT1G17470.1, AT1G76820.1, AT1G10630.1, AT5G42080.1	0.013	0.096	Cluster_2
GO:0016810	Molecular function	hydrolase activity, acting on carbon-nitrogen (but not peptide) bonds	9	0.815217	AT4G22930.1, AT3G07270.1, AT3G44750.1, AT5G64300.1, AT5G64370.1, AT1G51760.1, AT5G03740.1, AT5G08100.1, AT1G48420.1	4.3e-08	8.6e-07	Cluster_2
GO:0042626	Molecular function	ATPase activity, coupled to transmembrane movement of substances	9	0.815217	ATCG00120.1, AT3G21090.1, AT1G06190.1, AT1G12840.1, AT3G10670.1, AT3G22910.1, AT4G25450.1, AT4G04770.1, AT2G47800.1	7.4e-07	1.1e-05	Cluster_2
GO:0043492	Molecular function	ATPase activity, coupled to movement of substances	9	0.815217	ATCG00120.1, AT3G21090.1, AT1G06190.1, AT1G12840.1, AT3G10670.1, AT3G22910.1, AT4G25450.1, AT4G04770.1, AT2G47800.1	7.4e-07	1.1e-05	Cluster_2
GO:0016820	Molecular function	hydrolase activity, acting on acid anhydrides, catalyzing transmembrane movement of substances	9	0.815217	ATCG00120.1, AT3G21090.1, AT1G06190.1, AT1G12840.1, AT3G10670.1, AT3G22910.1, AT4G25450.1, AT4G04770.1, AT2G47800.1	7.4e-07	1.1e-05	Cluster_2
GO:0016830	Molecular function	carbon-carbon lyase activity	9	0.815217	AT5G11880.1, AT1G08200.1, AT1G43710.1, AT5G64300.1, AT2G29690.1, ATCG00490.1, AT3G14930.1, AT1G72970.1, AT1G67090.1	2e-06	2.9e-05	Cluster_2
GO:0016859	Molecular function	cis-trans isomerase activity	9	0.815217	AT3G56070.1, AT5G55220.1, AT2G43560.1, AT4G39710.1, AT4G33060.1, AT3G25230.2, AT3G01480.1, AT1G06820.1, AT3G62030.2	9.6e-06	0.00012	Cluster_2
GO:0016765	Molecular function	transferase activity, transferring alkyl or aryl (other than methyl) groups	8	0.724638	AT1G78380.1, AT3G09270.1, AT4G39980.1, AT1G22410.1, AT2G20690.1, AT1G60600.2, AT5G08280.1, AT1G02500.1	2.5e-07	4.2e-06	Cluster_2
GO:0016860	Molecular function	intramolecular oxidoreductase activity	8	0.724638	AT3G10230.1, AT3G04790.1, AT1G04980.1, AT4G24620.1, AT2G21170.1, AT5G16440.1, AT5G42740.1, AT3G16110.1	1e-05	0.00012	Cluster_2
GO:0003755	Molecular function	peptidyl-prolyl cis-trans isomerase activity	8	0.724638	AT3G56070.1, AT5G55220.1, AT2G43560.1, AT4G39710.1, AT4G33060.1, AT3G25230.2, AT3G01480.1, AT3G62030.2	5.7e-05	0.00059	Cluster_2
GO:0016903	Molecular function	oxidoreductase activity, acting on the aldehyde or oxo group of donors	8	0.724638	AT5G50850.1, AT2G19940.1, AT1G42970.1, AT1G01090.1, AT3G48000.1, AT3G26650.1, AT5G20630.1, AT4G36250.1	0.00016	0.0016	Cluster_2
GO:0008238	Molecular function	exopeptidase activity	8	0.724638	AT1G78680.1, AT3G51800.2, AT4G30920.1, AT3G12203.1, AT5G60160.1, AT5G42240.1, AT5G23210.1, AT4G12910.1	0.00042	0.0039	Cluster_2
GO:0005516	Molecular function	calmodulin binding	8	0.724638	AT3G22910.1, AT1G50590.1, AT2G28260.1, AT5G64040.2, AT5G62390.1, AT3G25230.2, AT5G20720.1, AT5G60390.1	0.001	0.0086	Cluster_2
GO:0016627	Molecular function	oxidoreductase activity, acting on the CH-CH group of donors	7	0.634058	AT4G16760.1, AT4G14210.1, AT4G37000.1, AT5G54190.1, AT1G03475.1, AT4G01690.1, AT1G03630.1	9.8e-09	2.1e-07	Cluster_2
GO:0016616	Molecular function	oxidoreductase activity, acting on the CH-OH group of donors, NAD or NADP as acceptor	7	0.634058	AT3G25530.1, AT1G72190.1, AT1G17650.1, AT1G31230.1, AT1G80560.1, AT3G58610.1, AT4G37990.1	1.1e-07	2e-06	Cluster_2
GO:0004222	Molecular function	metalloendopeptidase activity	7	0.634058	AT3G19170.1, AT5G35220.1, AT5G42390.1, AT5G05740.1, AT5G10540.1, AT5G51740.1, AT3G02090.2	2.9e-05	0.00032	Cluster_2
GO:0016209	Molecular function	antioxidant activity	7	0.634058	AT2G17420.1, AT4G33420.1, AT3G54660.1, AT4G35090.1, AT1G07890.3, AT1G77490.1, AT2G41680.1	8e-05	0.00079	Cluster_2
GO:0016758	Molecular function	transferase activity, transferring hexosyl groups	7	0.634058	AT4G01070.1, AT1G55850.1, AT5G64860.1, AT4G37800.1, AT2G23260.1, AT2G36850.1, AT2G36390.1	0.00032	0.003	Cluster_2
GO:0008026	Molecular function	ATP-dependent helicase activity	6	0.543478	AT5G26742.2, AT1G54270.1, AT3G19760.1, AT3G06480.1, AT4G00660.2, AT3G02060.1	3.5e-06	4.8e-05	Cluster_2
GO:0070035	Molecular function	purine NTP-dependent helicase activity	6	0.543478	AT5G26742.2, AT1G54270.1, AT3G19760.1, AT3G06480.1, AT4G00660.2, AT3G02060.1	3.5e-06	4.8e-05	Cluster_2
GO:0004518	Molecular function	nuclease activity	6	0.543478	AT3G03710.1, AT1G77680.1, AT5G07350.2, AT3G20390.1, AT1G14210.1, AT2G02990.1	8.2e-06	0.00011	Cluster_2
GO:0008187	Molecular function	poly-pyrimidine tract binding	6	0.543478	AT1G07320.1, AT3G50820.1, AT5G66570.1, AT4G24770.1, AT4G37930.1, AT1G06680.1	1.1e-05	0.00012	Cluster_2
GO:0008266	Molecular function	poly(U) RNA binding	6	0.543478	AT1G07320.1, AT3G50820.1, AT5G66570.1, AT4G24770.1, AT4G37930.1, AT1G06680.1	1.1e-05	0.00012	Cluster_2
GO:0003727	Molecular function	single-stranded RNA binding	6	0.543478	AT1G07320.1, AT3G50820.1, AT5G66570.1, AT4G24770.1, AT4G37930.1, AT1G06680.1	5.8e-05	0.00059	Cluster_2
GO:0003746	Molecular function	translation elongation factor activity	6	0.543478	AT1G45332.1, AT1G09640.1, AT5G60390.1, AT4G29060.1, AT3G08740.1, AT4G20360.1	6.9e-05	0.00069	Cluster_2
GO:0004386	Molecular function	helicase activity	6	0.543478	AT5G26742.2, AT1G54270.1, AT3G19760.1, AT3G06480.1, AT4G00660.2, AT3G02060.1	0.00043	0.004	Cluster_2
GO:0008483	Molecular function	transaminase activity	6	0.543478	AT2G13360.1, AT4G31990.3, AT3G49680.1, AT2G22250.2, AT1G80600.1, AT1G70580.1	0.001	0.0086	Cluster_2
GO:0016769	Molecular function	transferase activity, transferring nitrogenous groups	6	0.543478	AT2G13360.1, AT4G31990.3, AT3G49680.1, AT2G22250.2, AT1G80600.1, AT1G70580.1	0.0011	0.0094	Cluster_2
GO:0016831	Molecular function	carboxy-lyase activity	6	0.543478	AT5G11880.1, AT1G08200.1, AT1G43710.1, ATCG00490.1, AT3G14930.1, AT1G67090.1	0.0026	0.021	Cluster_2
GO:0004252	Molecular function	serine-type endopeptidase activity	6	0.543478	AT4G15040.1, AT3G27925.1, AT2G47940.1, AT1G73990.1, AT2G47390.1, AT4G30020.1	0.0028	0.022	Cluster_2
GO:0022890	Molecular function	inorganic cation transmembrane transporter activity	6	0.543478	ATCG00120.1, AT3G22910.1, AT5G13450.1, ATCG00480.1, AT1G80230.1, AT1G12840.1	0.005	0.038	Cluster_2
GO:0016667	Molecular function	oxidoreductase activity, acting on sulfur group of donors	6	0.543478	AT2G17420.1, AT3G54660.1, AT2G41680.1, AT5G42150.1, AT4G04950.1, AT3G16950.2	0.014	0.1	Cluster_2
GO:0016620	Molecular function	oxidoreductase activity, acting on the aldehyde or oxo group of donors, NAD or NADP as acceptor	5	0.452899	AT1G42970.1, AT4G36250.1, AT2G19940.1, AT3G26650.1, AT3G48000.1	1.7e-06	2.5e-05	Cluster_2
GO:0016763	Molecular function	transferase activity, transferring pentosyl groups	5	0.452899	AT1G55810.1, AT4G26900.1, AT2G37090.1, AT3G53900.2, AT1G09795.1	0.0022	0.018	Cluster_2
GO:0015078	Molecular function	hydrogen ion transmembrane transporter activity	5	0.452899	ATCG00120.1, AT5G13450.1, AT1G12840.1, AT1G80230.1, ATCG00480.1	0.0027	0.022	Cluster_2
GO:0016705	Molecular function	oxidoreductase activity, acting on paired donors, with incorporation or reduction of molecular oxygen	5	0.452899	AT3G56940.1, AT5G67030.1, AT1G58440.1, AT5G06290.1, AT5G07990.1	0.003	0.023	Cluster_2
GO:0003700	Molecular function	transcription factor activity	5	0.452899	AT3G12130.1, AT3G51880.2, AT3G28730.1, AT3G02060.1, AT4G29190.1	0.0043	0.033	Cluster_2
GO:0015077	Molecular function	monovalent inorganic cation transmembrane transporter activity	5	0.452899	ATCG00120.1, AT5G13450.1, AT1G12840.1, AT1G80230.1, ATCG00480.1	0.01	0.077	Cluster_2
GO:0004540	Molecular function	ribonuclease activity	5	0.452899	AT3G03710.1, AT2G02990.1, AT1G14210.1, AT3G20390.1, AT1G77680.1	0.028	0.19	Cluster_2
GO:0044464	Cellular component	cell part	504	45.6522	AT3G25530.1, AT4G33270.1, AT2G39940.1, AT5G67590.1, AT3G26720.1, AT1G79940.1, AT1G14210.1, AT3G47470.1, AT1G77680.1, AT5G60600.1, AT3G04790.1, AT3G46740.1, AT4G14210.1, AT3G10670.1, AT3G12780.1, AT2G45290.1, AT5G05000.2, AT4G24190.1, AT2G34430.1, AT5G62640.3, AT5G62670.1, AT5G09510.1, AT5G42650.1, AT1G80480.1, AT5G49650.1, AT2G24765.1, AT5G05010.1, AT4G24820.1, AT2G20690.1, AT5G11150.1, AT1G01710…	9.9e-179	1.2e-176	Cluster_2
GO:0005623	Cellular component	cell	504	45.6522	AT3G25530.1, AT4G33270.1, AT2G39940.1, AT5G67590.1, AT3G26720.1, AT1G79940.1, AT1G14210.1, AT3G47470.1, AT1G77680.1, AT5G60600.1, AT3G04790.1, AT3G46740.1, AT4G14210.1, AT3G10670.1, AT3G12780.1, AT2G45290.1, AT5G05000.2, AT4G24190.1, AT2G34430.1, AT5G62640.3, AT5G62670.1, AT5G09510.1, AT5G42650.1, AT1G80480.1, AT5G49650.1, AT2G24765.1, AT5G05010.1, AT4G24820.1, AT2G20690.1, AT5G11150.1, AT1G01710…	9.9e-179	1.2e-176	Cluster_2
GO:0005622	Cellular component	intracellular	469	42.4819	AT3G25530.1, AT2G20690.1, AT2G39940.1, AT5G67590.1, AT3G26720.1, AT1G79940.1, AT3G47470.1, AT1G77680.1, AT5G60600.1, AT3G04790.1, AT3G46740.1, AT4G14210.1, AT3G10670.1, AT3G12780.1, AT2G45290.1, AT5G05000.2, AT4G24190.1, AT2G34430.1, AT5G62640.3, AT5G09510.1, AT5G42650.1, AT1G80480.1, AT5G49650.1, AT2G24765.1, AT4G24820.1, AT5G11150.1, AT1G01710.1, AT1G74970.1, AT5G61410.1, AT2G28000.1, AT2G34480…	2.4e-128	1.4e-126	Cluster_2
GO:0044424	Cellular component	intracellular part	467	42.3007	AT3G25530.1, AT2G20690.1, AT2G39940.1, AT5G67590.1, AT3G26720.1, AT1G79940.1, AT3G47470.1, AT1G77680.1, AT5G60600.1, AT3G04790.1, AT3G46740.1, AT4G14210.1, AT3G10670.1, AT3G12780.1, AT2G45290.1, AT5G05000.2, AT4G24190.1, AT2G34430.1, AT5G62640.3, AT5G09510.1, AT5G42650.1, AT1G80480.1, AT5G49650.1, AT2G24765.1, AT4G24820.1, AT5G11150.1, AT1G01710.1, AT1G74970.1, AT5G61410.1, AT2G28000.1, AT2G34480…	2e-133	1.4e-131	Cluster_2
GO:0005737	Cellular component	cytoplasm	428	38.7681	AT3G25530.1, AT2G20690.1, AT5G67590.1, AT3G26720.1, AT1G79940.1, AT3G47470.1, AT1G77680.1, AT5G60600.1, AT3G04790.1, AT3G46740.1, AT4G14210.1, AT3G10670.1, AT3G12780.1, AT2G45290.1, AT5G05000.2, AT4G24190.1, AT2G34430.1, AT3G20390.1, AT5G09510.1, AT5G42650.1, AT3G02660.1, AT5G49650.1, AT2G24765.1, AT5G11150.1, AT1G01710.1, AT1G74970.1, AT5G61410.1, AT2G28000.1, AT2G34480.1, AT3G54890.1, AT1G15690…	5.2e-149	4.9e-147	Cluster_2
GO:0043229	Cellular component	intracellular organelle	421	38.1341	ATCG00180.1, AT2G20690.1, AT5G67590.1, AT3G26720.1, AT1G79940.1, AT3G47470.1, AT1G77680.1, AT5G60600.1, AT3G04790.1, AT3G46740.1, AT4G14210.1, AT3G10670.1, AT3G12780.1, AT2G45290.1, AT5G05000.2, AT4G24190.1, AT2G34430.1, AT5G62640.3, AT5G09510.1, AT5G42650.1, AT1G80480.1, AT3G11510.1, AT2G24765.1, AT4G24820.1, AT5G11150.1, AT1G01710.1, AT1G74970.1, AT5G61410.1, AT2G28000.1, AT2G34480.1, AT3G54890…	7.2e-117	3.7e-115	Cluster_2
GO:0043226	Cellular component	organelle	421	38.1341	ATCG00180.1, AT2G20690.1, AT5G67590.1, AT3G26720.1, AT1G79940.1, AT3G47470.1, AT1G77680.1, AT5G60600.1, AT3G04790.1, AT3G46740.1, AT4G14210.1, AT3G10670.1, AT3G12780.1, AT2G45290.1, AT5G05000.2, AT4G24190.1, AT2G34430.1, AT5G62640.3, AT5G09510.1, AT5G42650.1, AT1G80480.1, AT3G11510.1, AT2G24765.1, AT4G24820.1, AT5G11150.1, AT1G01710.1, AT1G74970.1, AT5G61410.1, AT2G28000.1, AT2G34480.1, AT3G54890…	8.8e-117	4.2e-115	Cluster_2
GO:0044444	Cellular component	cytoplasmic part	408	36.9565	AT3G25530.1, AT2G20690.1, AT5G67590.1, AT3G26720.1, AT1G79940.1, AT3G47470.1, AT1G77680.1, AT5G60600.1, AT3G04790.1, AT3G46740.1, AT4G14210.1, AT3G10670.1, AT3G12780.1, AT2G45290.1, AT5G05000.2, AT4G24190.1, AT2G34430.1, AT3G20390.1, AT5G09510.1, AT5G42650.1, AT3G02660.1, AT5G49650.1, AT2G24765.1, AT5G11150.1, AT1G01710.1, AT1G74970.1, AT5G61410.1, AT2G28000.1, AT2G34480.1, AT3G54890.1, AT1G15690…	9.4e-143	7.4e-141	Cluster_2
GO:0043231	Cellular component	intracellular membrane-bounded organelle	386	34.9638	ATCG00180.1, AT2G20690.1, AT3G26720.1, AT1G79940.1, AT3G47470.1, AT1G77680.1, AT5G60600.1, AT3G04790.1, AT3G46740.1, AT4G14210.1, AT3G10670.1, AT3G12780.1, AT2G45290.1, AT5G05000.2, AT4G24190.1, AT2G34430.1, AT5G62640.3, AT5G09510.1, AT5G42650.1, AT1G80480.1, AT3G11510.1, AT2G24765.1, AT4G24820.1, AT5G11150.1, AT1G01710.1, AT1G74970.1, AT5G61410.1, AT2G28000.1, AT3G54890.1, AT1G15690.1, AT1G72820…	6e-100	2.2e-98	Cluster_2
GO:0043227	Cellular component	membrane-bounded organelle	386	34.9638	ATCG00180.1, AT2G20690.1, AT3G26720.1, AT1G79940.1, AT3G47470.1, AT1G77680.1, AT5G60600.1, AT3G04790.1, AT3G46740.1, AT4G14210.1, AT3G10670.1, AT3G12780.1, AT2G45290.1, AT5G05000.2, AT4G24190.1, AT2G34430.1, AT5G62640.3, AT5G09510.1, AT5G42650.1, AT1G80480.1, AT3G11510.1, AT2G24765.1, AT4G24820.1, AT5G11150.1, AT1G01710.1, AT1G74970.1, AT5G61410.1, AT2G28000.1, AT3G54890.1, AT1G15690.1, AT1G72820…	8.1e-100	2.7e-98	Cluster_2
GO:0009536	Cellular component	plastid	256	23.1884	ATCG00120.1, AT4G03280.1, AT2G37240.1, AT2G47940.1, AT5G09650.1, AT3G15840.1, AT2G20690.1, AT2G28605.1, AT3G57050.1, AT1G07510.1, AT3G47520.1, ATCG00160.1, AT5G13630.1, AT3G47470.1, AT1G77680.1, AT4G01050.1, AT5G60600.1, AT3G54660.1, AT3G04790.1, AT3G46740.1, AT2G47450.1, AT3G10670.1, AT3G12780.1, AT1G60600.2, AT5G35630.1, AT2G45290.1, AT1G76100.1, AT1G76570.1, AT5G06290.1, AT4G04640.1, AT5G05000…	5.6e-100	2.2e-98	Cluster_2
GO:0009507	Cellular component	chloroplast	224	20.2899	ATCG00120.1, AT2G37240.1, AT2G47940.1, AT5G09650.1, AT3G15840.1, AT2G20690.1, AT2G28605.1, AT3G57050.1, AT3G47520.1, ATCG00160.1, AT5G13630.1, AT3G47470.1, AT1G77680.1, AT4G01050.1, AT5G60600.1, AT3G54660.1, AT3G04790.1, AT3G46740.1, AT2G47450.1, AT3G10670.1, AT1G60600.2, AT5G35630.1, AT2G45290.1, AT1G76100.1, AT1G76570.1, AT4G04640.1, AT5G05000.2, AT2G46820.1, AT1G12250.1, AT1G08520.1, AT1G42970…	7.9e-81	2.3e-79	Cluster_2
GO:0044422	Cellular component	organelle part	222	20.1087	ATCG00120.1, AT5G42650.1, AT2G47940.1, AT5G09650.1, AT3G05590.1, AT3G15840.1, AT1G27310.1, AT1G79940.1, AT5G13630.1, AT3G47470.1, AT2G19940.1, AT5G55280.1, AT4G01050.1, ATCG00810.1, AT4G05180.1, AT3G04790.1, AT3G46740.1, AT1G75690.1, AT3G12780.1, AT2G45290.1, AT1G76100.1, AT2G20260.1, AT5G42080.1, AT4G39080.1, AT5G06290.1, AT4G04640.1, AT5G05000.2, AT2G36830.1, AT1G12250.1, AT1G08520.1, AT1G42970…	4.1e-198	9.7e-196	Cluster_2
GO:0044446	Cellular component	intracellular organelle part	222	20.1087	ATCG00120.1, AT5G42650.1, AT2G47940.1, AT5G09650.1, AT3G05590.1, AT3G15840.1, AT1G27310.1, AT1G79940.1, AT5G13630.1, AT3G47470.1, AT2G19940.1, AT5G55280.1, AT4G01050.1, ATCG00810.1, AT4G05180.1, AT3G04790.1, AT3G46740.1, AT1G75690.1, AT3G12780.1, AT2G45290.1, AT1G76100.1, AT2G20260.1, AT5G42080.1, AT4G39080.1, AT5G06290.1, AT4G04640.1, AT5G05000.2, AT2G36830.1, AT1G12250.1, AT1G08520.1, AT1G42970…	4.1e-198	9.7e-196	Cluster_2
GO:0032991	Cellular component	macromolecular complex	154	13.9493	ATCG00120.1, AT5G40950.1, AT5G27640.2, AT3G05590.1, AT4G33270.1, AT2G39940.1, AT1G29930.1, AT5G11770.1, AT5G13630.1, AT1G31730.1, AT3G60770.1, AT5G10360.1, AT2G29560.1, AT1G05520.1, AT4G05180.1, AT3G46740.1, AT2G47450.1, AT2G36850.1, AT4G04640.1, AT5G16620.1, AT2G46820.1, AT1G08520.1, AT2G34430.1, AT4G10340.1, AT2G36620.1, AT5G09510.1, AT3G11510.1, ATCG00810.1, AT1G67090.1, AT4G12800.1, AT4G24820…	6.4e-107	2.7e-105	Cluster_2
GO:0016020	Cellular component	membrane	150	13.587	ATCG00120.1, AT2G47940.1, AT5G09650.1, AT5G14030.1, AT4G33270.1, AT5G60160.1, AT5G11770.1, AT3G26720.1, AT1G79940.1, AT5G13630.1, AT4G31340.1, AT3G21090.1, AT1G31730.1, AT2G19940.1, AT4G01050.1, AT1G05520.1, AT4G05180.1, AT3G04790.1, AT5G58140.2, AT3G46740.1, AT1G75690.1, AT3G56940.1, AT5G42080.1, AT2G36850.1, AT4G04640.1, AT5G05000.2, AT2G36830.1, AT1G12250.1, AT1G52190.1, AT2G34430.1, AT5G62670…	3.4e-16	4e-15	Cluster_2
GO:0044435	Cellular component	plastid part	146	13.2246	ATCG00120.1, AT2G47940.1, AT5G09650.1, AT2G47390.1, AT3G15840.1, AT5G13630.1, AT3G47470.1, AT2G19940.1, AT4G01050.1, AT4G05180.1, AT3G04790.1, AT3G46740.1, AT1G75690.1, AT3G12780.1, AT2G45290.1, AT1G76100.1, AT5G06290.1, AT4G04640.1, AT5G05000.2, AT2G46820.1, AT1G12250.1, AT1G08520.1, AT1G42970.1, AT2G34430.1, AT4G10340.1, AT4G12800.1, AT1G02560.1, AT5G42650.1, AT3G47520.1, AT2G30200.1, ATCG00810…	5.4e-89	1.7e-87	Cluster_2
GO:0044434	Cellular component	chloroplast part	117	10.5978	ATCG00120.1, AT2G47940.1, AT5G09650.1, AT2G47390.1, AT3G15840.1, AT5G13630.1, AT3G47470.1, AT2G19940.1, AT4G01050.1, AT4G05180.1, AT3G04790.1, AT3G46740.1, AT1G75690.1, AT2G45290.1, AT1G76100.1, AT4G04640.1, AT5G05000.2, AT2G46820.1, AT1G12250.1, AT1G08520.1, AT2G34430.1, AT4G10340.1, AT4G12800.1, AT1G02560.1, AT5G42650.1, AT2G30200.1, AT1G67090.1, AT5G55220.1, AT5G28750.1, AT3G54890.1, AT3G50820…	3.1e-67	8.6e-66	Cluster_2
GO:0043234	Cellular component	protein complex	91	8.24275	ATCG00120.1, AT5G27640.2, AT4G33270.1, AT2G39940.1, AT1G29930.1, AT5G11770.1, AT5G13630.1, AT3G47470.1, AT2G29560.1, AT1G05520.1, AT4G05180.1, AT3G57290.1, AT1G15820.1, AT2G36850.1, AT4G04640.1, AT5G16620.1, AT2G46820.1, AT1G08520.1, AT2G34430.1, AT4G10340.1, AT1G02560.1, AT1G67090.1, AT4G12800.1, AT4G24820.1, AT3G28730.1, AT5G12370.1, AT3G54890.1, AT3G50820.1, AT3G22110.1, AT2G29690.1, AT3G55330…	1.2e-65	2.8e-64	Cluster_2
GO:0043232	Cellular component	intracellular non-membrane-bounded organelle	81	7.33696	AT1G07320.1, AT1G73100.1, AT3G28730.1, AT1G02780.1, AT5G47700.1, AT2G42740.1, AT5G61170.1, AT3G05590.1, AT3G44750.1, AT5G02960.1, AT5G23740.1, AT4G31580.1, AT1G78630.1, AT5G40950.1, AT3G44890.1, AT4G09800.1, AT3G06180.1, AT2G47110.1, AT2G43030.1, AT5G59850.1, AT5G39850.1, AT5G03740.1, AT1G05190.1, AT3G60770.1, ATCG00380.1, AT2G19940.1, AT1G27400.1, AT3G25920.1, AT1G43170.1, ATCG00810.1, AT1G79850…	1.5e-27	2.3e-26	Cluster_2
GO:0043228	Cellular component	non-membrane-bounded organelle	81	7.33696	AT1G07320.1, AT1G73100.1, AT3G28730.1, AT1G02780.1, AT5G47700.1, AT2G42740.1, AT5G61170.1, AT3G05590.1, AT3G44750.1, AT5G02960.1, AT5G23740.1, AT4G31580.1, AT1G78630.1, AT5G40950.1, AT3G44890.1, AT4G09800.1, AT3G06180.1, AT2G47110.1, AT2G43030.1, AT5G59850.1, AT5G39850.1, AT5G03740.1, AT1G05190.1, AT3G60770.1, ATCG00380.1, AT2G19940.1, AT1G27400.1, AT3G25920.1, AT1G43170.1, ATCG00810.1, AT1G79850…	1.5e-27	2.3e-26	Cluster_2
GO:0005739	Cellular component	mitochondrion	77	6.97464	ATMG01190.1, AT2G43750.1, AT5G56680.1, AT1G80230.1, AT1G72820.1, AT1G53240.1, AT5G13450.1, AT1G56340.1, AT5G13490.1, AT5G26830.1, AT4G33010.1, AT5G13440.1, AT2G21170.1, AT5G04130.1, AT4G37000.1, AT5G11770.1, AT3G02090.2, AT5G67590.1, AT1G79940.1, AT4G34200.1, AT5G13630.1, ATMG00510.1, AT5G23060.1, AT4G35090.1, AT3G13490.1, AT1G45332.1, AT2G17420.1, AT3G54660.1, AT5G19620.1, AT3G02660.1, AT5G52520…	2.9e-39	5.9e-38	Cluster_2
GO:0031090	Cellular component	organelle membrane	71	6.43116	AT1G55670.1, ATCG00120.1, AT1G54780.1, AT3G50820.1, AT1G72820.1, AT5G66570.1, AT5G13450.1, AT5G23120.1, AT5G13490.1, AT1G12250.1, AT3G55330.1, AT1G06680.1, AT1G06950.1, AT3G02090.2, AT1G79940.1, AT5G13630.1, AT3G20320.1, AT2G47940.1, AT5G45390.1, AT4G01050.1, AT1G73990.1, AT4G05180.1, AT3G04790.1, AT2G28800.1, AT3G46740.1, AT1G75690.1, AT4G21150.1, AT5G40810.1, AT5G16620.1, AT4G32770.1, AT3G56940…	4.7e-27	6.9e-26	Cluster_2
GO:0005829	Cellular component	cytosol	70	6.34058	AT5G02500.1, AT3G04400.1, AT1G02780.1, AT4G37000.1, AT5G27640.2, AT3G05590.1, AT5G57020.1, AT5G02960.1, AT5G23740.1, AT3G05420.2, AT1G07110.1, AT2G42740.1, AT4G09800.1, AT5G10540.1, AT2G47110.1, AT3G62870.1, AT5G59850.1, AT5G39850.1, AT4G10320.1, AT3G60770.1, AT5G10360.1, AT1G27400.1, AT1G67230.1, AT2G29560.1, AT1G79850.1, AT4G35160.1, AT1G32990.1, AT1G74060.1, AT4G14960.2, AT5G56000.1, AT4G01310…	5.4e-26	7.4e-25	Cluster_2
GO:0031975	Cellular component	envelope	63	5.70652	ATCG00120.1, AT3G26650.1, AT1G72820.1, AT5G19620.1, AT3G63130.1, AT5G13450.1, AT5G13490.1, AT4G09650.1, AT2G26900.1, AT1G67280.1, AT1G27310.1, AT1G06950.1, AT3G02090.2, AT5G13630.1, AT1G23740.1, AT3G20320.1, AT2G46820.1, AT4G31990.3, AT3G04790.1, AT3G46740.1, AT3G54050.1, AT3G12780.1, AT5G40810.1, AT5G16620.1, AT4G32770.1, AT3G56940.1, AT4G39460.1, AT5G12470.1, AT1G15140.1, AT5G06290.1, AT5G13440…	6.1e-66	1.5e-64	Cluster_2
GO:0031967	Cellular component	organelle envelope	63	5.70652	ATCG00120.1, AT3G26650.1, AT1G72820.1, AT5G19620.1, AT3G63130.1, AT5G13450.1, AT5G13490.1, AT4G09650.1, AT2G26900.1, AT1G67280.1, AT1G27310.1, AT1G06950.1, AT3G02090.2, AT5G13630.1, AT1G23740.1, AT3G20320.1, AT2G46820.1, AT4G31990.3, AT3G04790.1, AT3G46740.1, AT3G54050.1, AT3G12780.1, AT5G40810.1, AT5G16620.1, AT4G32770.1, AT3G56940.1, AT4G39460.1, AT5G12470.1, AT1G15140.1, AT5G06290.1, AT5G13440…	6.1e-66	1.5e-64	Cluster_2
GO:0030529	Cellular component	ribonucleoprotein complex	63	5.70652	AT1G07320.1, AT5G40950.1, AT1G02780.1, AT5G61170.1, AT3G05590.1, AT5G57020.1, AT5G02960.1, AT5G23740.1, AT1G78630.1, AT2G42740.1, AT4G09800.1, AT3G06180.1, AT2G47110.1, AT5G39850.1, AT5G59850.1, AT2G43030.1, AT1G05190.1, AT2G47450.1, AT3G60770.1, ATCG00380.1, AT5G10360.1, AT1G27400.1, AT3G25920.1, AT1G43170.1, AT3G09440.1, AT1G79850.1, AT1G32990.1, AT5G04800.1, AT1G74060.1, AT4G01310.1, AT4G25500…	1.6e-24	2.1e-23	Cluster_2
GO:0005840	Cellular component	ribosome	61	5.52536	AT1G07320.1, AT5G40950.1, AT1G02780.1, AT5G61170.1, AT3G05590.1, AT5G57020.1, AT5G02960.1, AT5G23740.1, AT1G78630.1, AT2G42740.1, AT4G09800.1, AT3G06180.1, AT2G47110.1, AT5G39850.1, AT5G59850.1, AT2G43030.1, AT1G05190.1, AT3G60770.1, ATCG00380.1, AT5G10360.1, AT1G27400.1, AT3G25920.1, AT1G43170.1, AT3G09440.1, AT1G79850.1, AT1G32990.1, AT5G04800.1, AT1G74060.1, AT4G01310.1, ATCG00160.1, AT3G09630…	1.9e-29	3.2e-28	Cluster_2
GO:0005634	Cellular component	nucleus	58	5.25362	AT1G73100.1, AT3G28730.1, AT3G58660.1, AT5G27640.2, AT2G19480.1, AT3G44750.1, AT5G35620.1, AT3G05420.2, AT3G04610.1, AT1G29660.1, AT3G57290.1, AT1G27310.1, AT5G05610.1, AT3G63130.1, AT5G63980.1, AT4G31580.1, AT5G03740.1, AT3G60770.1, AT2G19940.1, AT2G25430.1, AT3G19760.1, AT1G29150.1, AT4G25630.1, AT1G74060.1, AT1G67230.1, AT5G56000.1, AT4G25500.1, AT2G27040.1, AT1G18450.1, AT5G54160.1, AT2G39990…	4.6e-41	9.7e-40	Cluster_2
GO:0044425	Cellular component	membrane part	56	5.07246	AT1G55670.1, ATCG00120.1, AT3G50820.1, AT5G66570.1, AT5G13450.1, AT3G13772.1, AT1G30380.1, AT1G03130.1, AT4G33270.1, AT1G74790.1, AT3G55330.1, AT1G06680.1, AT1G06950.1, AT3G02090.2, AT1G79940.1, ATCG00680.1, AT5G40810.1, ATMG00510.1, AT1G31730.1, ATCG00270.1, AT1G73990.1, AT4G05180.1, AT5G50920.1, AT3G46740.1, AT1G15820.1, AT5G53870.1, AT5G06140.1, AT5G23120.1, AT1G10950.1, AT2G36850.1, AT5G13440…	2.6e-28	4.2e-27	Cluster_2
GO:0034357	Cellular component	photosynthetic membrane	53	4.80072	AT1G55670.1, ATCG00120.1, AT1G54780.1, AT3G50820.1, AT2G47940.1, AT1G12250.1, AT1G30380.1, AT1G03130.1, AT3G55330.1, AT1G06680.1, AT1G15820.1, AT2G20260.1, ATCG00680.1, AT5G45390.1, AT4G01050.1, AT1G73990.1, AT4G05180.1, AT3G04790.1, AT2G28800.1, AT1G75690.1, AT5G23120.1, AT3G56940.1, AT5G66570.1, AT4G04640.1, AT1G74470.1, AT2G46820.1, AT3G61470.1, AT5G64040.2, AT2G34430.1, AT1G55480.1, AT1G31330…	1.1e-33	2e-32	Cluster_2
GO:0033279	Cellular component	ribosomal subunit	47	4.25725	AT1G07320.1, AT2G42740.1, AT1G02780.1, AT3G05590.1, AT5G02960.1, AT5G23740.1, AT2G47110.1, AT3G62870.1, AT5G59850.1, AT5G39850.1, AT1G05190.1, AT3G60770.1, ATCG00380.1, AT5G10360.1, AT1G27400.1, AT1G43170.1, AT3G44890.1, AT1G79850.1, AT1G74970.1, AT1G74060.1, AT4G01310.1, ATCG00160.1, AT4G09800.1, AT5G27770.1, AT4G39200.1, AT3G02560.1, AT3G09630.1, AT2G36620.1, AT5G09510.1, AT3G11510.1, ATCG00810…	1e-42	2.2e-41	Cluster_2
GO:0070013	Cellular component	intracellular organelle lumen	42	3.80435	AT3G28730.1, AT3G50820.1, AT3G44750.1, AT5G23120.1, AT3G55330.1, AT1G67280.1, AT1G06680.1, AT3G58660.1, AT3G62600.1, AT3G47860.1, AT3G02090.2, AT1G54780.1, AT4G31580.1, AT5G03740.1, AT3G60770.1, AT2G19940.1, AT2G43560.1, AT4G05180.1, AT3G19760.1, AT4G25630.1, AT1G74060.1, AT5G52970.1, AT4G25500.1, AT2G27040.1, AT5G66570.1, AT5G27770.1, AT1G12250.1, AT3G09630.1, AT5G64040.2, AT5G39830.1, AT4G37930…	1e-14	1.1e-13	Cluster_2
GO:0043233	Cellular component	organelle lumen	42	3.80435	AT3G28730.1, AT3G50820.1, AT3G44750.1, AT5G23120.1, AT3G55330.1, AT1G67280.1, AT1G06680.1, AT3G58660.1, AT3G62600.1, AT3G47860.1, AT3G02090.2, AT1G54780.1, AT4G31580.1, AT5G03740.1, AT3G60770.1, AT2G19940.1, AT2G43560.1, AT4G05180.1, AT3G19760.1, AT4G25630.1, AT1G74060.1, AT5G52970.1, AT4G25500.1, AT2G27040.1, AT5G66570.1, AT5G27770.1, AT1G12250.1, AT3G09630.1, AT5G64040.2, AT5G39830.1, AT4G37930…	1e-14	1.1e-13	Cluster_2
GO:0031974	Cellular component	membrane-enclosed lumen	42	3.80435	AT3G28730.1, AT3G50820.1, AT3G44750.1, AT5G23120.1, AT3G55330.1, AT1G67280.1, AT1G06680.1, AT3G58660.1, AT3G62600.1, AT3G47860.1, AT3G02090.2, AT1G54780.1, AT4G31580.1, AT5G03740.1, AT3G60770.1, AT2G19940.1, AT2G43560.1, AT4G05180.1, AT3G19760.1, AT4G25630.1, AT1G74060.1, AT5G52970.1, AT4G25500.1, AT2G27040.1, AT5G66570.1, AT5G27770.1, AT1G12250.1, AT3G09630.1, AT5G64040.2, AT5G39830.1, AT4G37930…	1.4e-14	1.5e-13	Cluster_2
GO:0022626	Cellular component	cytosolic ribosome	38	3.44203	AT2G42740.1, AT1G02780.1, AT3G05590.1, AT5G02960.1, AT5G23740.1, AT2G47110.1, AT5G39850.1, AT5G59850.1, AT3G62870.1, AT3G60770.1, AT5G10360.1, AT1G27400.1, AT1G43170.1, AT1G79850.1, AT1G74970.1, AT1G74060.1, AT4G09800.1, AT5G27770.1, AT4G39200.1, AT3G02560.1, AT3G09630.1, AT2G36620.1, AT5G09510.1, AT3G11510.1, AT3G09440.1, AT4G36130.1, AT3G49080.1, AT3G04770.1, AT2G40010.1, AT4G16720.1, AT3G04400…	1.7e-37	3.3e-36	Cluster_2
GO:0005886	Cellular component	plasma membrane	38	3.44203	AT5G13450.1, AT3G13772.1, AT5G14030.1, AT5G26830.1, AT4G33270.1, AT1G74790.1, AT5G03700.1, AT5G60160.1, AT3G26720.1, AT3G62870.1, AT4G31340.1, AT1G30360.1, AT4G36130.1, AT1G27400.1, AT2G25430.1, AT1G30630.1, AT5G56000.1, AT5G53870.1, AT1G56140.1, AT5G42080.1, AT2G36850.1, AT4G32285.1, AT5G60390.1, AT5G27770.1, AT1G12840.1, AT3G09630.1, AT5G62670.1, AT5G09510.1, AT3G09440.1, AT2G47800.1, AT4G24820…	6.1e-07	4.6e-06	Cluster_2
GO:0044445	Cellular component	cytosolic part	36	3.26087	AT2G42740.1, AT1G02780.1, AT3G05590.1, AT5G02960.1, AT5G23740.1, AT2G47110.1, AT5G39850.1, AT5G59850.1, AT3G62870.1, AT3G60770.1, AT5G10360.1, AT1G27400.1, AT2G29560.1, AT1G79850.1, AT1G74970.1, AT1G74060.1, AT4G09800.1, AT5G27770.1, AT4G39200.1, AT3G02560.1, AT3G09630.1, AT2G36620.1, AT5G09510.1, AT3G11510.1, AT4G36130.1, AT3G49080.1, AT3G04770.1, AT4G16720.1, AT3G04400.1, AT5G61170.1, AT1G43170…	2.1e-34	3.8e-33	Cluster_2
GO:0009941	Cellular component	chloroplast envelope	31	2.80797	AT5G19620.1, AT1G15140.1, AT1G55480.1, AT1G06950.1, AT5G13630.1, AT3G20320.1, AT4G01050.1, AT3G04790.1, AT3G46740.1, AT5G28750.1, AT5G16620.1, AT4G32770.1, AT3G56940.1, AT5G12470.1, AT1G23740.1, AT1G74470.1, AT5G05000.2, AT2G46820.1, AT5G50920.1, AT1G16880.1, AT4G25080.3, AT3G16620.1, AT5G55220.1, AT4G02510.1, AT1G03160.1, AT1G71500.1, AT3G26570.1, AT3G58610.1, AT1G32080.1, AT2G26900.1, AT4G01310…	4.7e-35	8.8e-34	Cluster_2
GO:0010287	Cellular component	plastoglobule	29	2.62681	ATCG00120.1, AT3G50820.1, AT2G46910.1, AT4G09650.1, AT1G15820.1, AT2G20260.1, ATCG00680.1, AT3G47470.1, AT1G61520.1, ATCG00270.1, AT4G32770.1, AT5G66570.1, AT2G34430.1, AT1G31330.1, AT2G21330.1, AT4G10340.1, AT4G38970.1, AT5G42650.1, ATCG00480.1, AT4G12800.1, ATCG00340.1, ATCG00280.1, AT1G52230.1, ATCG00490.1, AT1G09340.1, AT2G05070.1, ATCG00020.1, AT2G39730.1, AT3G54890.1	7.3e-26	9.8e-25	Cluster_2
GO:0015934	Cellular component	large ribosomal subunit	26	2.35507	AT1G07320.1, AT2G42740.1, AT1G02780.1, AT3G05590.1, AT3G62870.1, AT1G05190.1, AT4G36130.1, AT1G27400.1, AT1G43170.1, AT3G44890.1, AT1G74060.1, AT5G27770.1, AT3G09630.1, AT2G36620.1, ATCG00810.1, ATCG00790.1, ATCG00780.1, AT4G16720.1, AT3G04400.1, AT3G25920.1, AT1G32990.1, AT4G01310.1, ATCG01310.1, AT2G34480.1, AT1G23290.1, AT3G27830.1	2.9e-26	4.1e-25	Cluster_2
GO:0044428	Cellular component	nuclear part	24	2.17391	AT3G28730.1, AT3G58660.1, AT3G63130.1, AT3G44750.1, AT3G57290.1, AT1G27310.1, AT4G31580.1, AT3G60770.1, AT2G19940.1, AT3G19760.1, AT4G25630.1, AT1G74060.1, AT3G11510.1, AT4G25500.1, AT2G27040.1, AT5G27770.1, AT3G09630.1, AT1G10390.1, AT3G58500.1, AT5G09510.1, AT5G03740.1, AT3G13570.1, AT5G64200.1, AT3G05060.1	4.5e-05	0.00029	Cluster_2
GO:0015935	Cellular component	small ribosomal subunit	21	1.90217	AT3G49080.1, AT3G60770.1, ATCG00380.1, AT3G04770.1, AT4G39200.1, AT5G61170.1, AT1G79850.1, AT4G09800.1, AT5G02960.1, AT5G23740.1, AT1G74970.1, ATCG00750.1, AT5G09510.1, AT2G37270.1, AT2G47110.1, AT5G39850.1, AT3G11510.1, AT5G59850.1, AT3G02560.1, ATCG00160.1, AT5G10360.1	4.3e-18	5.2e-17	Cluster_2
GO:0005773	Cellular component	vacuole	20	1.81159	AT1G78680.1, AT2G36830.1, AT1G27400.1, AT4G30920.1, AT5G11150.1, AT1G12840.1, AT3G09630.1, AT5G61170.1, AT3G20390.1, AT5G59970.1, AT4G36130.1, AT5G40810.1, AT4G39080.1, AT5G60160.1, AT3G06480.1, AT3G26720.1, AT2G47800.1, AT3G09440.1, AT1G15690.1, AT5G60390.1	8.6e-19	1.1e-17	Cluster_2
GO:0031981	Cellular component	nuclear lumen	20	1.81159	AT4G25630.1, AT3G13570.1, AT5G27770.1, AT2G19940.1, AT3G44750.1, AT3G19760.1, AT5G03740.1, AT3G09630.1, AT1G74060.1, AT5G64200.1, AT3G60770.1, AT5G09510.1, AT3G28730.1, AT3G58660.1, AT4G25500.1, AT2G27040.1, AT3G05060.1, AT3G11510.1, AT4G31580.1, AT3G58500.1	1.7e-15	1.9e-14	Cluster_2
GO:0005618	Cellular component	cell wall	20	1.81159	AT1G68560.1, AT3G60770.1, AT3G18080.1, AT1G53240.1, AT5G59850.1, AT3G09630.1, AT1G04980.1, AT5G11420.1, AT1G33590.1, AT5G03340.1, AT5G26830.1, AT5G56000.1, AT4G21150.1, AT4G37800.1, AT5G20950.1, AT4G30020.1, AT3G26720.1, AT2G01970.1, AT3G09440.1, AT3G58610.1	0.0003	0.0018	Cluster_2
GO:0030312	Cellular component	external encapsulating structure	20	1.81159	AT1G68560.1, AT3G60770.1, AT3G18080.1, AT1G53240.1, AT5G59850.1, AT3G09630.1, AT1G04980.1, AT5G11420.1, AT1G33590.1, AT5G03340.1, AT5G26830.1, AT5G56000.1, AT4G21150.1, AT4G37800.1, AT5G20950.1, AT4G30020.1, AT3G26720.1, AT2G01970.1, AT3G09440.1, AT3G58610.1	0.00034	0.002	Cluster_2
GO:0019866	Cellular component	organelle inner membrane	18	1.63043	AT1G06950.1, AT5G13440.1, AT3G20320.1, AT1G72820.1, AT5G50920.1, AT5G33320.1, AT5G13450.1, AT4G32770.1, AT5G13490.1, ATCG00480.1, AT5G40810.1, AT5G16620.1, AT3G56940.1, AT3G02090.2, AT4G39460.1, AT5G12470.1, AT1G32080.1, AT5G13630.1	1.3e-18	1.6e-17	Cluster_2
GO:0022627	Cellular component	cytosolic small ribosomal subunit	18	1.63043	AT3G49080.1, AT3G60770.1, AT3G04770.1, AT4G39200.1, AT5G61170.1, AT1G79850.1, AT4G09800.1, AT5G02960.1, AT5G23740.1, AT1G74970.1, AT5G09510.1, AT2G37270.1, AT2G47110.1, AT5G39850.1, AT3G11510.1, AT5G59850.1, AT3G02560.1, AT5G10360.1	4e-16	4.6e-15	Cluster_2
GO:0031977	Cellular component	thylakoid lumen	18	1.63043	AT5G66570.1, AT1G54780.1, AT3G50820.1, AT3G27925.1, AT1G12250.1, AT2G43560.1, AT4G05180.1, AT5G64040.2, AT5G23120.1, AT4G39710.1, AT5G39830.1, AT3G47860.1, AT3G55330.1, AT1G67280.1, AT1G06680.1, AT5G52970.1, AT3G01480.1, AT1G76100.1	1e-12	1e-11	Cluster_2
GO:0005730	Cellular component	nucleolus	16	1.44928	AT3G60770.1, AT5G27770.1, AT2G19940.1, AT3G44750.1, AT3G19760.1, AT3G09630.1, AT1G74060.1, AT3G58500.1, AT5G09510.1, AT4G25630.1, AT3G58660.1, AT2G27040.1, AT3G05060.1, AT3G11510.1, AT4G31580.1, AT5G03740.1	1e-13	1e-12	Cluster_2
GO:0031978	Cellular component	plastid thylakoid lumen	16	1.44928	AT5G66570.1, AT1G54780.1, AT3G50820.1, AT3G27925.1, AT1G12250.1, AT2G43560.1, AT4G05180.1, AT5G64040.2, AT5G23120.1, AT4G39710.1, AT5G39830.1, AT3G55330.1, AT1G06680.1, AT5G52970.1, AT3G01480.1, AT1G76100.1	3e-11	2.9e-10	Cluster_2
GO:0009543	Cellular component	chloroplast thylakoid lumen	16	1.44928	AT5G66570.1, AT1G54780.1, AT3G50820.1, AT3G27925.1, AT1G12250.1, AT2G43560.1, AT4G05180.1, AT5G64040.2, AT5G23120.1, AT4G39710.1, AT5G39830.1, AT3G55330.1, AT1G06680.1, AT5G52970.1, AT3G01480.1, AT1G76100.1	3e-11	2.9e-10	Cluster_2
GO:0005783	Cellular component	endoplasmic reticulum	16	1.44928	AT1G68530.1, AT4G24190.1, AT4G36250.1, AT5G13640.1, AT2G28630.1, AT1G55850.1, AT1G23010.1, AT2G26250.1, AT5G62390.1, AT1G51760.1, AT4G21150.1, AT1G56340.1, AT3G62600.1, AT3G16110.1, AT1G79940.1, AT4G31340.1	0.0065	0.037	Cluster_2
GO:0042170	Cellular component	plastid membrane	15	1.3587	AT3G20320.1, AT4G02510.1, AT5G05000.2, AT5G50920.1, AT4G32770.1, AT3G46740.1, AT1G03160.1, AT3G16620.1, AT5G33320.1, AT5G16620.1, AT1G06950.1, AT3G56940.1, AT5G12470.1, AT1G32080.1, AT5G13630.1	6.3e-10	5.6e-09	Cluster_2
GO:0031969	Cellular component	chloroplast membrane	14	1.26812	AT3G20320.1, AT4G02510.1, AT5G05000.2, AT5G50920.1, AT4G32770.1, AT3G46740.1, AT1G03160.1, AT3G16620.1, AT5G16620.1, AT1G06950.1, AT3G56940.1, AT5G12470.1, AT1G32080.1, AT5G13630.1	8.5e-10	7.4e-09	Cluster_2
GO:0005576	Cellular component	extracellular region	14	1.26812	AT1G68560.1, AT1G23740.1, AT3G48990.1, AT1G72970.1, AT4G37800.1, AT3G54050.1, AT5G56000.1, AT1G29660.1, AT5G51750.1, AT5G20630.1, AT5G10540.1, AT3G58610.1, AT3G09440.1, AT2G02990.1	0.0018	0.011	Cluster_2
GO:0009547	Cellular component	plastid ribosome	13	1.17754	AT1G07320.1, ATCG00380.1, ATCG00790.1, ATCG00780.1, AT3G44890.1, AT1G79850.1, AT3G25920.1, AT1G74970.1, ATCG00750.1, ATCG01310.1, ATCG00160.1, ATCG00810.1, AT3G27830.1	9e-11	8.1e-10	Cluster_2
GO:0000313	Cellular component	organellar ribosome	13	1.17754	AT1G07320.1, ATCG00380.1, ATCG00790.1, ATCG00780.1, AT3G44890.1, AT1G79850.1, AT3G25920.1, AT1G74970.1, ATCG00750.1, ATCG01310.1, ATCG00160.1, ATCG00810.1, AT3G27830.1	2.6e-09	2.3e-08	Cluster_2
GO:0005777	Cellular component	peroxisome	11	0.996377	AT5G09660.4, AT4G16760.1, AT4G09320.1, AT4G17520.1, AT1G01710.1, AT4G35090.1, AT1G48320.1, AT2G22780.1, AT2G13360.1, AT4G05530.1, AT1G70580.1	4.1e-11	3.8e-10	Cluster_2
GO:0042579	Cellular component	microbody	11	0.996377	AT5G09660.4, AT4G16760.1, AT4G09320.1, AT4G17520.1, AT1G01710.1, AT4G35090.1, AT1G48320.1, AT2G22780.1, AT2G13360.1, AT4G05530.1, AT1G70580.1	4.1e-11	3.8e-10	Cluster_2
GO:0005794	Cellular component	Golgi apparatus	11	0.996377	AT1G62020.1, AT1G05520.1, AT1G64880.1, AT3G27530.1, AT5G58140.2, AT3G13772.1, AT2G01970.1, AT1G10950.1, AT2G24765.1, AT1G30620.1, AT2G37090.1	3e-08	2.5e-07	Cluster_2
GO:0044429	Cellular component	mitochondrial part	11	0.996377	AT5G13440.1, AT2G17420.1, AT1G72820.1, AT5G13450.1, AT5G13490.1, ATCG00480.1, AT4G37930.1, AT1G80230.1, AT3G02090.2, AT4G39460.1, AT5G40810.1	1.7e-07	1.4e-06	Cluster_2
GO:0048046	Cellular component	apoplast	11	0.996377	AT1G68560.1, AT1G23740.1, AT3G48990.1, AT4G37800.1, AT3G54050.1, AT5G56000.1, AT1G29660.1, AT5G51750.1, AT5G10540.1, AT3G58610.1, AT3G09440.1	0.0019	0.011	Cluster_2
GO:0009528	Cellular component	plastid inner membrane	10	0.905797	AT3G20320.1, AT5G50920.1, AT4G32770.1, AT5G33320.1, AT5G16620.1, AT3G56940.1, AT1G06950.1, AT5G12470.1, AT1G32080.1, AT5G13630.1	5e-08	4.1e-07	Cluster_2
GO:0009706	Cellular component	chloroplast inner membrane	9	0.815217	AT3G20320.1, AT5G50920.1, AT4G32770.1, AT5G16620.1, AT3G56940.1, AT1G06950.1, AT5G12470.1, AT1G32080.1, AT5G13630.1	2.8e-07	2.2e-06	Cluster_2
GO:0005740	Cellular component	mitochondrial envelope	9	0.815217	AT5G13440.1, AT1G72820.1, AT5G13450.1, AT5G13490.1, ATCG00480.1, AT1G80230.1, AT3G02090.2, AT4G39460.1, AT5G40810.1	1.5e-06	1e-05	Cluster_2
GO:0000311	Cellular component	plastid large ribosomal subunit	8	0.724638	AT1G07320.1, ATCG00790.1, ATCG00780.1, AT3G44890.1, AT3G25920.1, ATCG01310.1, ATCG00810.1, AT3G27830.1	1.9e-07	1.5e-06	Cluster_2
GO:0005743	Cellular component	mitochondrial inner membrane	8	0.724638	AT5G13440.1, AT1G72820.1, AT5G13450.1, AT5G13490.1, ATCG00480.1, AT3G02090.2, AT4G39460.1, AT5G40810.1	4.1e-07	3.1e-06	Cluster_2
GO:0000315	Cellular component	organellar large ribosomal subunit	8	0.724638	AT1G07320.1, ATCG00790.1, ATCG00780.1, AT3G44890.1, AT3G25920.1, ATCG01310.1, ATCG00810.1, AT3G27830.1	8.2e-07	6e-06	Cluster_2
GO:0031966	Cellular component	mitochondrial membrane	8	0.724638	AT5G13440.1, AT1G72820.1, AT5G13450.1, AT5G13490.1, ATCG00480.1, AT3G02090.2, AT4G39460.1, AT5G40810.1	5.6e-06	3.7e-05	Cluster_2
GO:0030095	Cellular component	chloroplast photosystem II	7	0.634058	AT5G66570.1, AT3G50820.1, AT1G73990.1, AT4G05180.1, AT5G23120.1, AT3G55330.1, AT1G06680.1	1.4e-06	1e-05	Cluster_2
GO:0005654	Cellular component	nucleoplasm	7	0.634058	AT3G28730.1, AT3G13570.1, AT3G19760.1, AT5G64200.1, AT4G25500.1, AT2G27040.1, AT4G31580.1	1.8e-06	1.2e-05	Cluster_2
GO:0044451	Cellular component	nucleoplasm part	7	0.634058	AT3G28730.1, AT3G13570.1, AT3G19760.1, AT5G64200.1, AT4G25500.1, AT2G27040.1, AT4G31580.1	1.8e-06	1.2e-05	Cluster_2
GO:0005694	Cellular component	chromosome	7	0.634058	AT1G73100.1, AT2G46820.1, AT3G46780.1, AT3G28730.1, AT2G27040.1, AT1G80480.1, AT3G51880.2	2.5e-05	0.00016	Cluster_2
GO:0005852	Cellular component	eukaryotic translation initiation factor 3 complex	6	0.543478	AT5G27640.2, AT2G39990.1, AT1G10840.1, AT3G57290.1, AT4G11420.1, AT4G33250.1	3.6e-07	2.8e-06	Cluster_2
GO:0016604	Cellular component	nuclear body	6	0.543478	AT3G13570.1, AT3G19760.1, AT5G64200.1, AT4G25500.1, AT2G27040.1, AT4G31580.1	0.0003	0.0018	Cluster_2
GO:0005774	Cellular component	vacuolar membrane	6	0.543478	AT2G36830.1, AT5G11150.1, AT1G12840.1, AT4G39080.1, AT1G15690.1, AT2G47800.1	0.0081	0.045	Cluster_2
GO:0044437	Cellular component	vacuolar part	6	0.543478	AT2G36830.1, AT5G11150.1, AT1G12840.1, AT4G39080.1, AT1G15690.1, AT2G47800.1	0.0096	0.052	Cluster_2
GO:0070469	Cellular component	respiratory chain	6	0.543478	AT5G13440.1, AT5G67590.1, AT5G11770.1, AT3G02090.2, AT5G40810.1, ATMG00510.1	0.017	0.094	Cluster_2
GO:0019867	Cellular component	outer membrane	5	0.452899	AT3G02090.2, AT3G16620.1, AT4G02510.1, AT5G05000.2, AT3G46740.1	1.7e-06	1.2e-05	Cluster_2
GO:0000314	Cellular component	organellar small ribosomal subunit	5	0.452899	ATCG00160.1, AT1G74970.1, ATCG00750.1, ATCG00380.1, AT1G79850.1	2.8e-06	1.9e-05	Cluster_2
GO:0009654	Cellular component	oxygen evolving complex	5	0.452899	AT5G66570.1, AT4G05180.1, AT3G55330.1, AT3G50820.1, AT1G06680.1	4.8e-05	0.00031	Cluster_2
GO:0000312	Cellular component	plastid small ribosomal subunit	5	0.452899	ATCG00160.1, AT1G74970.1, ATCG00750.1, ATCG00380.1, AT1G79850.1	0.00012	0.00077	Cluster_2
GO:0016607	Cellular component	nuclear speck	5	0.452899	AT4G25500.1, AT5G64200.1, AT3G13570.1, AT3G19760.1, AT4G31580.1	0.00022	0.0014	Cluster_2
GO:0000502	Cellular component	proteasome complex	5	0.452899	AT1G29150.1, AT5G45620.1, AT4G24820.1, AT3G22110.1, AT2G32730.1	0.0059	0.034	Cluster_2
GO:0031968	Cellular component	organelle outer membrane	5	0.452899	AT3G02090.2, AT3G16620.1, AT4G02510.1, AT5G05000.2, AT3G46740.1	0.0085	0.047	Cluster_2
GO:0044455	Cellular component	mitochondrial membrane part	5	0.452899	AT3G02090.2, AT5G13450.1, AT5G13440.1, AT5G40810.1, ATCG00480.1	0.027	0.14	Cluster_2

## Sheet: GO of Cluster 3 & 4
Table 2. GO enrichment analysis of significant proteins in cluster 3 and 4 using AgriGO web-based software
GO_acc	Term_type	Term	queryitem	percentage	entries	p-value	FDR	Cluster
GO:0008152	Biological process	metabolic process	110	24.5536	AT5G37830.1, AT5G60160.1, AT3G26720.1, AT1G70730.3, AT2G43710.2, AT5G07990.1, AT5G38470.1, AT1G43710.1, AT2G30490.1, AT5G60670.1, AT1G55860.1, AT5G19550.1, AT3G56460.1, AT5G54160.1, AT1G22450.1, AT3G21720.1, AT4G16130.1, AT5G62930.1, AT2G02990.1, AT1G16030.1, AT3G54110.1, AT3G53620.1, AT5G42740.1, AT3G55620.1, AT4G34480.1, AT4G01070.1, AT5G64420.1, AT2G32120.1, AT2G21170.1, AT2G40840.1, AT5G22060…	9.5e-08	1.3e-06	Cluster_3
GO:0009987	Biological process	cellular process	105	23.4375	AT5G37830.1, AT4G33270.1, AT3G26720.1, AT2G43710.2, AT5G07990.1, AT5G38470.1, AT1G43710.1, AT2G30490.1, AT5G60670.1, AT1G55860.1, AT1G16300.1, AT3G51840.1, AT5G54160.1, AT2G36830.1, AT4G16130.1, AT2G02990.1, AT1G16030.1, AT3G54110.1, AT3G28850.1, AT5G42740.1, AT3G55620.1, AT4G17170.1, AT4G01070.1, AT5G64420.1, AT2G19860.1, AT2G32120.1, AT2G21170.1, AT2G40840.1, AT5G22060.1, AT5G18100.1, AT5G03290…	0.00019	0.0014	Cluster_3
GO:0044237	Biological process	cellular metabolic process	85	18.9732	AT3G12580.1, AT5G37830.1, AT3G15730.1, AT3G62600.1, AT4G01070.1, AT5G09590.1, AT5G64420.1, AT4G36020.1, AT2G32120.1, AT5G14420.1, AT2G21170.1, AT2G05830.1, AT2G40840.1, AT5G22060.1, AT5G18100.1, AT3G26720.1, AT5G54080.1, AT2G27450.2, AT5G03290.1, AT3G24503.1, AT1G69740.1, AT4G15530.5, AT2G43710.2, AT1G13440.1, AT5G07990.1, AT5G38470.1, AT1G43710.1, AT5G45620.1, AT5G67360.1, AT3G07770.1, AT2G30490…	5.7e-05	0.00047	Cluster_3
GO:0044238	Biological process	primary metabolic process	85	18.9732	AT3G12580.1, AT5G37830.1, AT3G15730.1, AT3G62600.1, AT5G54080.1, AT5G64420.1, AT4G15040.1, AT4G36020.1, AT2G32120.1, AT3G10450.1, AT2G21170.1, AT2G05830.1, AT2G40840.1, AT5G22060.1, AT5G60160.1, AT3G55620.1, AT3G26720.1, AT2G27450.2, AT2G20680.1, AT3G24503.1, AT1G70730.3, AT2G43710.2, AT1G13440.1, AT5G07990.1, AT5G38470.1, AT1G43710.1, AT5G45620.1, AT5G67360.1, AT3G07770.1, AT2G30490.1, AT5G48930…	0.00025	0.0018	Cluster_3
GO:0050896	Biological process	response to stimulus	77	17.1875	AT3G12580.1, AT3G06050.1, AT3G15730.1, AT1G23740.1, AT4G01070.1, AT1G53240.1, AT3G08590.1, AT4G01900.1, AT4G12400.2, AT4G00430.1, AT2G19860.1, AT4G36020.1, AT2G32120.1, AT1G76180.1, AT1G60940.1, AT1G59960.1, AT2G36530.1, AT5G60160.1, AT5G18100.1, AT4G20260.4, AT1G14210.1, AT2G20420.1, AT2G43710.2, AT1G13440.1, AT5G07990.1, AT5G38470.1, AT2G17840.1, AT4G13850.1, AT3G02260.1, AT2G30490.1, AT1G54100…	1e-50	7.7e-48	Cluster_3
GO:0006950	Biological process	response to stress	56	12.5	AT3G12580.1, AT3G06050.1, AT2G33150.1, AT1G53240.1, AT4G12400.2, AT4G00430.1, AT4G36020.1, AT2G32120.1, AT1G76180.1, AT1G60940.1, AT1G59960.1, AT5G18100.1, AT4G20260.4, AT1G54100.1, AT1G23740.1, AT2G43710.2, AT1G13440.1, AT5G38470.1, AT2G17840.1, AT4G13850.1, AT3G23990.1, AT2G30490.1, AT1G14210.1, AT5G09810.1, AT5G14780.1, AT5G52640.1, AT5G37980.1, AT1G08830.1, AT2G05710.1, AT5G12020.1, AT1G79930…	3.9e-46	1.5e-43	Cluster_3
GO:0043170	Biological process	macromolecule metabolic process	50	11.1607	AT3G12580.1, AT4G15040.1, AT5G64420.1, AT4G36020.1, AT2G32120.1, AT1G13950.1, AT2G05830.1, AT2G40840.1, AT5G22060.1, AT5G60160.1, AT3G55620.1, AT1G47250.1, AT3G51800.2, AT1G13440.1, AT5G38470.1, AT4G27270.1, AT5G45620.1, AT5G67360.1, AT3G07770.1, AT5G60670.1, AT1G55860.1, AT5G56260.1, AT3G02660.1, AT1G23100.1, AT1G79930.1, AT5G60390.1, AT2G03820.1, AT2G16600.1, AT3G10450.1, AT1G74310.1, AT3G22110…	2.1e-24	2.3e-22	Cluster_3
GO:0042221	Biological process	response to chemical stimulus	47	10.4911	AT3G12580.1, AT3G06050.1, AT4G01070.1, AT1G53240.1, AT3G08590.1, AT4G12400.2, AT4G00430.1, AT2G19860.1, AT2G32120.1, AT1G76180.1, AT4G01900.1, AT5G60160.1, AT5G18100.1, AT1G54100.1, AT2G20420.1, AT1G13440.1, AT4G13780.1, AT2G17840.1, AT3G15730.1, AT3G02260.1, AT5G09810.1, AT5G52640.1, AT1G71230.1, AT5G37980.1, AT1G08830.1, AT2G05710.1, AT5G16970.1, AT2G36830.1, AT4G33420.1, AT2G37170.1, AT3G48330…	3.7e-36	7.2e-34	Cluster_3
GO:0009628	Biological process	response to abiotic stimulus	46	10.2679	AT3G12580.1, AT1G53240.1, AT5G09590.1, AT4G12400.2, AT4G00430.1, AT4G36020.1, AT2G32120.1, AT1G76180.1, AT1G60940.1, AT1G59960.1, AT4G20260.4, AT1G54100.1, AT5G07990.1, AT5G38470.1, AT2G17840.1, AT4G13850.1, AT3G02260.1, AT2G30490.1, AT1G14210.1, AT5G09810.1, AT5G52640.1, AT3G15620.1, AT1G08830.1, AT2G05710.1, AT5G12020.1, AT1G79930.1, AT4G01900.1, AT1G23740.1, AT2G37170.1, AT3G48330.1, AT1G74310…	1e-40	2.6e-38	Cluster_3
GO:0044260	Biological process	cellular macromolecule metabolic process	42	9.375	AT3G12580.1, AT5G64420.1, AT4G36020.1, AT2G32120.1, AT1G13950.1, AT2G05830.1, AT2G40840.1, AT5G22060.1, AT3G55620.1, AT1G47250.1, AT1G13440.1, AT5G38470.1, AT4G27270.1, AT5G45620.1, AT3G07770.1, AT5G60670.1, AT1G55860.1, AT5G56260.1, AT3G02660.1, AT1G23100.1, AT1G79930.1, AT5G60390.1, AT2G03820.1, AT2G16600.1, AT3G48330.1, AT1G74310.1, AT3G22110.1, AT1G16300.1, AT3G09440.1, AT1G71230.1, AT1G16030…	2e-19	1.7e-17	Cluster_3
GO:0019538	Biological process	protein metabolic process	34	7.58929	AT3G12580.1, AT4G15040.1, AT3G22110.1, AT2G32120.1, AT1G13950.1, AT2G05830.1, AT5G22060.1, AT5G60160.1, AT3G55620.1, AT1G47250.1, AT3G51800.2, AT4G13780.1, AT4G32940.1, AT5G45620.1, AT5G67360.1, AT3G07770.1, AT5G60670.1, AT1G55860.1, AT3G02660.1, AT1G23100.1, AT1G79930.1, AT5G60390.1, AT2G16600.1, AT3G10450.1, AT1G74310.1, AT3G48330.1, AT1G11910.1, AT3G09440.1, AT1G71230.1, AT1G16030.1, AT1G09640…	3.9e-24	3.8e-22	Cluster_3
GO:0009058	Biological process	biosynthetic process	34	7.58929	AT5G64420.1, AT1G13950.1, AT2G05830.1, AT3G55620.1, AT1G69740.1, AT2G43710.2, AT1G13440.1, AT5G07990.1, AT4G13780.1, AT4G27270.1, AT2G30490.1, AT5G60670.1, AT2G27450.2, AT3G02660.1, AT1G30620.1, AT4G01900.1, AT5G54160.1, AT5G17990.1, AT3G45140.1, AT2G33150.1, AT1G06570.1, AT5G48930.1, AT2G02990.1, AT3G24503.1, AT5G49190.1, AT1G09640.1, AT3G54110.1, AT4G21150.1, AT2G21170.1, AT5G42740.1, AT2G40890…	4.6e-14	2e-12	Cluster_3
GO:0044249	Biological process	cellular biosynthetic process	33	7.36607	AT5G64420.1, AT1G13950.1, AT2G05830.1, AT3G55620.1, AT1G69740.1, AT2G43710.2, AT1G13440.1, AT5G07990.1, AT4G13780.1, AT4G27270.1, AT2G30490.1, AT5G60670.1, AT2G27450.2, AT3G02660.1, AT1G30620.1, AT4G01900.1, AT5G54160.1, AT5G17990.1, AT3G45140.1, AT2G33150.1, AT1G06570.1, AT5G48930.1, AT2G02990.1, AT3G24503.1, AT5G49190.1, AT1G09640.1, AT3G54110.1, AT4G21150.1, AT5G42740.1, AT2G40890.1, AT5G60390…	2.1e-14	1e-12	Cluster_3
GO:0044267	Biological process	cellular protein metabolic process	27	6.02679	AT3G12580.1, AT3G22110.1, AT2G32120.1, AT1G13950.1, AT2G05830.1, AT5G22060.1, AT3G55620.1, AT1G47250.1, AT4G13780.1, AT5G45620.1, AT3G07770.1, AT5G60670.1, AT1G55860.1, AT3G02660.1, AT1G23100.1, AT1G79930.1, AT5G60390.1, AT2G16600.1, AT3G48330.1, AT1G74310.1, AT3G09440.1, AT1G71230.1, AT1G16030.1, AT1G09640.1, AT5G09590.1, AT4G21150.1, AT3G62600.1	5e-18	3.1e-16	Cluster_3
GO:0009266	Biological process	response to temperature stimulus	24	5.35714	AT3G12580.1, AT4G13850.1, AT4G12400.2, AT4G36020.1, AT2G32120.1, AT1G76180.1, AT4G20260.4, AT1G53240.1, AT5G38470.1, AT2G17840.1, AT2G36530.1, AT5G52640.1, AT5G12020.1, AT1G79930.1, AT1G23740.1, AT1G74310.1, AT2G25140.1, AT3G09440.1, AT3G23990.1, AT1G16030.1, AT5G52300.1, AT5G09590.1, AT4G04020.1, AT4G21150.1	4.7e-32	7.3e-30	Cluster_3
GO:0051179	Biological process	localization	24	5.35714	AT4G17170.1, AT5G14040.1, AT5G47450.1, AT4G00430.1, AT2G46520.1, AT5G19980.1, AT1G05520.1, AT3G02260.1, AT1G62500.1, AT1G52190.1, AT2G36070.1, AT4G33090.1, AT5G11710.1, AT2G36830.1, AT1G26690.1, AT2G37170.1, AT3G52850.1, AT4G02510.1, AT3G18570.1, AT1G72160.1, AT5G20230.1, AT3G54110.1, AT1G75850.1, AT4G35920.1	1.6e-10	4.1e-09	Cluster_3
GO:0006810	Biological process	transport	23	5.13393	AT4G17170.1, AT5G14040.1, AT5G47450.1, AT4G00430.1, AT2G46520.1, AT5G19980.1, AT1G05520.1, AT3G02260.1, AT1G62500.1, AT1G52190.1, AT2G36070.1, AT4G33090.1, AT5G11710.1, AT2G36830.1, AT1G26690.1, AT2G37170.1, AT3G52850.1, AT4G02510.1, AT1G72160.1, AT5G20230.1, AT3G54110.1, AT1G75850.1, AT4G35920.1	3.2e-10	7.6e-09	Cluster_3
GO:0051234	Biological process	establishment of localization	23	5.13393	AT4G17170.1, AT5G14040.1, AT5G47450.1, AT4G00430.1, AT2G46520.1, AT5G19980.1, AT1G05520.1, AT3G02260.1, AT1G62500.1, AT1G52190.1, AT2G36070.1, AT4G33090.1, AT5G11710.1, AT2G36830.1, AT1G26690.1, AT2G37170.1, AT3G52850.1, AT4G02510.1, AT1G72160.1, AT5G20230.1, AT3G54110.1, AT1G75850.1, AT4G35920.1	3.9e-10	8.8e-09	Cluster_3
GO:0032502	Biological process	developmental process	23	5.13393	AT3G15730.1, AT5G56680.1, AT4G13850.1, AT1G13950.1, AT3G55620.1, AT3G15880.2, AT5G09810.1, AT1G43710.1, AT5G67360.1, AT3G02260.1, AT2G30490.1, AT1G67490.1, AT2G02990.1, AT3G02660.1, AT3G51840.1, AT4G36600.1, AT3G48330.1, AT5G11520.1, AT4G37300.1, AT3G22490.1, AT1G71230.1, AT3G13530.1, AT1G23010.1	1e-09	2e-08	Cluster_3
GO:0006807	Biological process	nitrogen compound metabolic process	23	5.13393	AT5G64420.1, AT4G36020.1, AT5G14420.1, AT4G12130.1, AT1G43710.1, AT5G54080.1, AT5G56260.1, AT3G02660.1, AT1G30620.1, AT5G19550.1, AT4G01900.1, AT2G03820.1, AT5G12040.1, AT5G38470.1, AT5G22300.1, AT5G17990.1, AT2G27450.2, AT4G13780.1, AT4G27270.1, AT1G62810.1, AT1G69740.1, AT1G49820.1, AT4G29190.1	3.7e-08	5.4e-07	Cluster_3
GO:0009056	Biological process	catabolic process	22	4.91071	AT5G37830.1, AT4G01070.1, AT3G22110.1, AT2G40840.1, AT1G47250.1, AT1G13440.1, AT4G12130.1, AT5G45620.1, AT5G54080.1, AT5G03290.1, AT1G55860.1, AT2G17120.1, AT3G51840.1, AT2G03820.1, AT3G24360.1, AT1G16300.1, AT2G33150.1, AT3G55410.1, AT5G56350.1, AT1G79550.1, AT5G42740.1, AT1G12000.1	3.1e-18	2.2e-16	Cluster_3
GO:0007275	Biological process	multicellular organismal development	22	4.91071	AT3G15730.1, AT5G56680.1, AT4G13850.1, AT1G13950.1, AT3G55620.1, AT3G15880.2, AT3G13530.1, AT1G43710.1, AT5G09810.1, AT5G67360.1, AT3G02260.1, AT2G30490.1, AT1G67490.1, AT3G02660.1, AT3G51840.1, AT4G36600.1, AT3G48330.1, AT5G11520.1, AT4G37300.1, AT3G22490.1, AT1G71230.1, AT1G23010.1	5.7e-10	1.2e-08	Cluster_3
GO:0032501	Biological process	multicellular organismal process	22	4.91071	AT3G15730.1, AT5G56680.1, AT4G13850.1, AT1G13950.1, AT3G55620.1, AT3G15880.2, AT3G13530.1, AT1G43710.1, AT5G09810.1, AT5G67360.1, AT3G02260.1, AT2G30490.1, AT1G67490.1, AT3G02660.1, AT3G51840.1, AT4G36600.1, AT3G48330.1, AT5G11520.1, AT4G37300.1, AT3G22490.1, AT1G71230.1, AT1G23010.1	1.1e-09	2.3e-08	Cluster_3
GO:0044248	Biological process	cellular catabolic process	21	4.6875	AT3G55410.1, AT5G37830.1, AT1G13440.1, AT4G01070.1, AT4G12130.1, AT3G24360.1, AT5G45620.1, AT5G54080.1, AT3G22110.1, AT3G51840.1, AT1G55860.1, AT5G56350.1, AT2G33150.1, AT1G16300.1, AT2G40840.1, AT1G79550.1, AT5G42740.1, AT1G47250.1, AT5G03290.1, AT1G12000.1, AT2G03820.1	2.6e-08	4.1e-07	Cluster_3
GO:0005975	Biological process	carbohydrate metabolic process	21	4.6875	AT1G08110.4, AT1G70730.3, AT4G34480.1, AT5G49190.1, AT1G13440.1, AT4G21150.1, AT3G55410.1, AT3G61610.1, AT3G16910.1, AT1G30620.1, AT5G56350.1, AT4G16130.1, AT2G21170.1, AT1G16300.1, AT2G40840.1, AT1G79550.1, AT5G42740.1, AT5G57655.2, AT3G26720.1, AT2G20680.1, AT1G12000.1	5.2e-07	6.1e-06	Cluster_3
GO:0010035	Biological process	response to inorganic substance	19	4.24107	AT3G12580.1, AT1G12000.1, AT1G53240.1, AT1G60420.1, AT3G08590.1, AT4G13780.1, AT4G12400.2, AT1G74310.1, AT2G32120.1, AT5G42740.1, AT5G52640.1, AT2G20420.1, AT2G45290.1, AT5G60160.1, AT5G18100.1, AT3G09440.1, AT2G05710.1, AT1G08830.1, AT3G48990.1	3.8e-28	4.8e-26	Cluster_3
GO:0065007	Biological process	biological regulation	19	4.24107	AT4G15040.1, AT2G16600.1, AT2G36830.1, AT5G09810.1, AT4G27270.1, AT4G04020.1, AT3G15730.1, AT5G52300.1, AT3G02260.1, AT2G19860.1, AT4G33270.1, AT5G14420.1, AT1G71230.1, AT3G28850.1, AT4G33090.1, AT5G56260.1, AT5G48930.1, AT2G02990.1, AT4G29190.1	0.00017	0.0013	Cluster_3
GO:0006519	Biological process	cellular amino acid and derivative metabolic process	17	3.79464	AT5G37830.1, AT3G24503.1, AT5G07990.1, AT4G13780.1, AT1G43710.1, AT4G01900.1, AT4G12130.1, AT5G54080.1, AT2G30490.1, AT5G17990.1, AT2G27450.2, AT2G40890.1, AT3G02660.1, AT1G49820.1, AT5G48930.1, AT2G02990.1, AT5G54160.1	1.6e-06	1.8e-05	Cluster_3
GO:0043436	Biological process	oxoacid metabolic process	17	3.79464	AT3G16910.1, AT3G15730.1, AT2G43710.2, AT1G13440.1, AT4G13780.1, AT1G43710.1, AT4G12130.1, AT5G54080.1, AT5G17990.1, AT3G24360.1, AT3G13930.1, AT3G45140.1, AT2G33150.1, AT5G42740.1, AT3G02660.1, AT1G49820.1, AT3G51840.1	3.5e-05	0.0003	Cluster_3
GO:0019752	Biological process	carboxylic acid metabolic process	17	3.79464	AT3G16910.1, AT3G15730.1, AT2G43710.2, AT1G13440.1, AT4G13780.1, AT1G43710.1, AT4G12130.1, AT5G54080.1, AT5G17990.1, AT3G24360.1, AT3G13930.1, AT3G45140.1, AT2G33150.1, AT5G42740.1, AT3G02660.1, AT1G49820.1, AT3G51840.1	3.5e-05	0.0003	Cluster_3
GO:0006082	Biological process	organic acid metabolic process	17	3.79464	AT3G16910.1, AT3G15730.1, AT2G43710.2, AT1G13440.1, AT4G13780.1, AT1G43710.1, AT4G12130.1, AT5G54080.1, AT5G17990.1, AT3G24360.1, AT3G13930.1, AT3G45140.1, AT2G33150.1, AT5G42740.1, AT3G02660.1, AT1G49820.1, AT3G51840.1	3.6e-05	0.0003	Cluster_3
GO:0042180	Biological process	cellular ketone metabolic process	17	3.79464	AT3G16910.1, AT3G15730.1, AT2G43710.2, AT1G13440.1, AT4G13780.1, AT1G43710.1, AT4G12130.1, AT5G54080.1, AT5G17990.1, AT3G24360.1, AT3G13930.1, AT3G45140.1, AT2G33150.1, AT5G42740.1, AT3G02660.1, AT1G49820.1, AT3G51840.1	4.6e-05	0.00038	Cluster_3
GO:0010033	Biological process	response to organic substance	16	3.57143	AT2G36530.1, AT2G36830.1, AT5G09810.1, AT4G04020.1, AT3G15730.1, AT5G52300.1, AT3G48330.1, AT2G19860.1, AT3G02260.1, AT1G76180.1, AT1G71230.1, AT3G45140.1, AT4G01900.1, AT2G05710.1, AT1G54100.1, AT2G02990.1	6.9e-11	1.9e-09	Cluster_3
GO:0048856	Biological process	anatomical structure development	16	3.57143	AT4G36600.1, AT5G56680.1, AT1G67490.1, AT1G43710.1, AT3G02660.1, AT5G67360.1, AT1G23010.1, AT3G02260.1, AT5G09810.1, AT1G13950.1, AT5G11520.1, AT3G55620.1, AT3G22490.1, AT4G37300.1, AT3G15880.2, AT3G51840.1	3.2e-08	4.7e-07	Cluster_3
GO:0009416	Biological process	response to light stimulus	16	3.57143	AT3G12580.1, AT5G20230.1, AT5G07990.1, AT2G36530.1, AT4G12400.2, AT2G17840.1, AT1G48030.1, AT3G02260.1, AT2G30490.1, AT2G32120.1, AT5G09810.1, AT1G74310.1, AT3G15620.1, AT4G01900.1, AT4G04020.1, AT1G71230.1	1.3e-06	1.5e-05	Cluster_3
GO:0009314	Biological process	response to radiation	16	3.57143	AT3G12580.1, AT5G20230.1, AT5G07990.1, AT2G36530.1, AT4G12400.2, AT2G17840.1, AT1G48030.1, AT3G02260.1, AT2G30490.1, AT2G32120.1, AT5G09810.1, AT1G74310.1, AT3G15620.1, AT4G01900.1, AT4G04020.1, AT1G71230.1	1.9e-06	2.1e-05	Cluster_3
GO:0009791	Biological process	post-embryonic development	16	3.57143	AT4G36600.1, AT5G56680.1, AT4G13850.1, AT1G43710.1, AT3G02660.1, AT5G67360.1, AT3G48330.1, AT3G02260.1, AT5G09810.1, AT3G15730.1, AT3G55620.1, AT3G22490.1, AT4G37300.1, AT3G15880.2, AT3G51840.1, AT1G71230.1	1e-05	9.2e-05	Cluster_3
GO:0044262	Biological process	cellular carbohydrate metabolic process	15	3.34821	AT3G16910.1, AT5G49190.1, AT1G13440.1, AT4G21150.1, AT3G55410.1, AT3G61610.1, AT5G56350.1, AT4G16130.1, AT1G16300.1, AT2G40840.1, AT1G79550.1, AT5G42740.1, AT3G26720.1, AT1G30620.1, AT1G12000.1	2.5e-14	1.1e-12	Cluster_3
GO:0050789	Biological process	regulation of biological process	14	3.125	AT2G16600.1, AT2G36830.1, AT5G52300.1, AT4G27270.1, AT4G04020.1, AT3G15730.1, AT2G19860.1, AT4G33270.1, AT5G56260.1, AT1G71230.1, AT3G28850.1, AT5G48930.1, AT2G02990.1, AT4G29190.1	0.0053	0.036	Cluster_3
GO:0009719	Biological process	response to endogenous stimulus	14	3.125	AT2G36530.1, AT2G36830.1, AT5G09810.1, AT3G15730.1, AT5G52300.1, AT3G48330.1, AT4G04020.1, AT3G02260.1, AT1G76180.1, AT1G71230.1, AT3G45140.1, AT2G05710.1, AT1G54100.1, AT2G02990.1	0.0091	0.061	Cluster_3
GO:0010038	Biological process	response to metal ion	13	2.90179	AT3G48990.1, AT1G12000.1, AT1G53240.1, AT3G08590.1, AT4G13780.1, AT5G42740.1, AT2G20420.1, AT2G45290.1, AT5G60160.1, AT2G05710.1, AT3G09440.1, AT1G08830.1, AT1G60420.1	4.2e-19	3.3e-17	Cluster_3
GO:0044265	Biological process	cellular macromolecule catabolic process	13	2.90179	AT1G13440.1, AT5G45620.1, AT3G22110.1, AT1G47250.1, AT1G55860.1, AT5G56350.1, AT1G16300.1, AT2G40840.1, AT1G79550.1, AT5G42740.1, AT3G55410.1, AT1G12000.1, AT2G03820.1	5.7e-16	2.9e-14	Cluster_3
GO:0006970	Biological process	response to osmotic stress	13	2.90179	AT1G53240.1, AT2G17840.1, AT4G13850.1, AT5G52300.1, AT3G48330.1, AT1G14210.1, AT1G11910.1, AT1G60940.1, AT1G59960.1, AT1G08830.1, AT2G05710.1, AT1G54100.1, AT1G77120.1	8.9e-13	3.3e-11	Cluster_3
GO:0006979	Biological process	response to oxidative stress	13	2.90179	AT3G12580.1, AT3G06050.1, AT5G20230.1, AT1G13440.1, AT4G33420.1, AT4G12400.2, AT1G74310.1, AT2G32120.1, AT5G37980.1, AT2G05710.1, AT1G08830.1, AT5G18100.1, AT5G16970.1	4.9e-12	1.6e-10	Cluster_3
GO:0050794	Biological process	regulation of cellular process	13	2.90179	AT2G16600.1, AT2G36830.1, AT5G52300.1, AT4G27270.1, AT3G15730.1, AT2G19860.1, AT4G33270.1, AT5G56260.1, AT4G04020.1, AT3G28850.1, AT5G48930.1, AT2G02990.1, AT4G29190.1	0.0037	0.026	Cluster_3
GO:0009057	Biological process	macromolecule catabolic process	13	2.90179	AT1G13440.1, AT5G45620.1, AT3G22110.1, AT1G47250.1, AT1G55860.1, AT5G56350.1, AT1G16300.1, AT2G40840.1, AT1G79550.1, AT5G42740.1, AT3G55410.1, AT1G12000.1, AT2G03820.1	0.016	0.11	Cluster_3
GO:0009408	Biological process	response to heat	12	2.67857	AT3G12580.1, AT3G23990.1, AT1G16030.1, AT3G09440.1, AT4G12400.2, AT1G74310.1, AT2G32120.1, AT5G52640.1, AT2G25140.1, AT5G09590.1, AT5G12020.1, AT1G79930.1	5.2e-18	3.1e-16	Cluster_3
GO:0009409	Biological process	response to cold	12	2.67857	AT4G13850.1, AT1G23740.1, AT2G36530.1, AT1G53240.1, AT2G17840.1, AT5G38470.1, AT5G52300.1, AT4G04020.1, AT4G36020.1, AT1G76180.1, AT4G21150.1, AT4G20260.4	3.1e-16	1.7e-14	Cluster_3
GO:0034645	Biological process	cellular macromolecule biosynthetic process	12	2.67857	AT4G13780.1, AT1G13950.1, AT5G64420.1, AT5G60670.1, AT4G27270.1, AT4G21150.1, AT2G05830.1, AT3G02660.1, AT3G55620.1, AT4G29190.1, AT1G09640.1, AT5G60390.1	0.00083	0.0059	Cluster_3
GO:0009059	Biological process	macromolecule biosynthetic process	12	2.67857	AT4G13780.1, AT1G13950.1, AT5G64420.1, AT5G60670.1, AT4G27270.1, AT4G21150.1, AT2G05830.1, AT3G02660.1, AT3G55620.1, AT4G29190.1, AT1G09640.1, AT5G60390.1	0.00087	0.0061	Cluster_3
GO:0010467	Biological process	gene expression	12	2.67857	AT4G13780.1, AT4G27270.1, AT5G64420.1, AT5G60670.1, AT4G32940.1, AT1G13950.1, AT2G05830.1, AT3G02660.1, AT3G55620.1, AT4G29190.1, AT1G09640.1, AT5G60390.1	0.0034	0.024	Cluster_3
GO:0009725	Biological process	response to hormone stimulus	12	2.67857	AT2G36530.1, AT2G36830.1, AT5G09810.1, AT3G15730.1, AT5G52300.1, AT3G48330.1, AT4G04020.1, AT3G02260.1, AT1G76180.1, AT2G05710.1, AT1G54100.1, AT1G71230.1	0.025	0.16	Cluster_3
GO:0006457	Biological process	protein folding	11	2.45536	AT3G12580.1, AT1G16030.1, AT5G09590.1, AT2G16600.1, AT3G07770.1, AT2G32120.1, AT5G22060.1, AT3G62600.1, AT1G23100.1, AT3G09440.1, AT1G79930.1	1.2e-13	4.8e-12	Cluster_3
GO:0005996	Biological process	monosaccharide metabolic process	11	2.45536	AT1G13440.1, AT3G61610.1, AT3G55410.1, AT5G56350.1, AT4G16130.1, AT1G16300.1, AT1G79550.1, AT5G42740.1, AT3G26720.1, AT1G30620.1, AT1G12000.1	7.6e-13	2.9e-11	Cluster_3
GO:0006091	Biological process	generation of precursor metabolites and energy	11	2.45536	AT1G13440.1, AT3G55410.1, AT4G04020.1, AT1G77120.1, AT5G56350.1, AT1G16300.1, AT1G79550.1, AT5G42740.1, AT5G64210.1, AT5G03290.1, AT1G12000.1	2.1e-12	7.4e-11	Cluster_3
GO:0006066	Biological process	alcohol metabolic process	11	2.45536	AT1G13440.1, AT3G61610.1, AT3G55410.1, AT5G56350.1, AT4G16130.1, AT1G16300.1, AT1G79550.1, AT5G42740.1, AT3G26720.1, AT1G30620.1, AT1G12000.1	1e-11	3.4e-10	Cluster_3
GO:0006575	Biological process	cellular amino acid derivative metabolic process	11	2.45536	AT5G37830.1, AT3G24503.1, AT5G07990.1, AT2G30490.1, AT5G17990.1, AT2G27450.2, AT4G01900.1, AT2G40890.1, AT5G48930.1, AT2G02990.1, AT5G54160.1	3.6e-11	1.1e-09	Cluster_3
GO:0009651	Biological process	response to salt stress	11	2.45536	AT1G53240.1, AT2G17840.1, AT5G52300.1, AT3G48330.1, AT1G14210.1, AT1G11910.1, AT1G60940.1, AT1G59960.1, AT1G08830.1, AT2G05710.1, AT1G54100.1	6.4e-11	1.8e-09	Cluster_3
GO:0006725	Biological process	cellular aromatic compound metabolic process	11	2.45536	AT3G24503.1, AT5G07990.1, AT5G54080.1, AT2G30490.1, AT5G17990.1, AT5G14420.1, AT4G01900.1, AT2G40890.1, AT5G48930.1, AT2G02990.1, AT5G54160.1	2.9e-10	7.1e-09	Cluster_3
GO:0051716	Biological process	cellular response to stimulus	11	2.45536	AT1G77510.1, AT2G36830.1, AT4G01070.1, AT5G38470.1, AT3G15730.1, AT1G23010.1, AT2G19860.1, AT5G52300.1, AT1G08830.1, AT5G18100.1, AT2G02990.1	0.016	0.11	Cluster_3
GO:0006508	Biological process	proteolysis	11	2.45536	AT3G51800.2, AT1G11910.1, AT4G32940.1, AT5G45620.1, AT5G67360.1, AT3G22110.1, AT4G15040.1, AT3G10450.1, AT1G55860.1, AT5G60160.1, AT1G47250.1	0.022	0.14	Cluster_3
GO:0003006	Biological process	reproductive developmental process	11	2.45536	AT4G36600.1, AT5G56680.1, AT1G43710.1, AT5G67360.1, AT3G02260.1, AT3G02660.1, AT3G22490.1, AT4G37300.1, AT3G15880.2, AT3G55620.1, AT3G51840.1	0.046	0.28	Cluster_3
GO:0048608	Biological process	reproductive structure development	11	2.45536	AT4G36600.1, AT5G56680.1, AT1G43710.1, AT5G67360.1, AT3G02260.1, AT3G02660.1, AT3G22490.1, AT4G37300.1, AT3G15880.2, AT3G55620.1, AT3G51840.1	0.046	0.28	Cluster_3
GO:0042398	Biological process	cellular amino acid derivative biosynthetic process	10	2.23214	AT3G24503.1, AT5G07990.1, AT2G30490.1, AT5G17990.1, AT2G27450.2, AT4G01900.1, AT2G40890.1, AT5G48930.1, AT2G02990.1, AT5G54160.1	1.6e-10	4.1e-09	Cluster_3
GO:0009605	Biological process	response to external stimulus	10	2.23214	AT5G20230.1, AT3G51660.1, AT1G23010.1, AT2G30490.1, AT5G09810.1, AT5G14780.1, AT3G45140.1, AT2G33150.1, AT2G02990.1, AT4G35920.1	5.8e-10	1.2e-08	Cluster_3
GO:0009308	Biological process	amine metabolic process	10	2.23214	AT4G12130.1, AT1G43710.1, AT4G13780.1, AT5G54080.1, AT1G62810.1, AT5G17990.1, AT5G14420.1, AT2G27450.2, AT3G02660.1, AT1G49820.1	3.6e-09	6.3e-08	Cluster_3
GO:0048316	Biological process	seed development	10	2.23214	AT4G36600.1, AT5G56680.1, AT1G43710.1, AT5G67360.1, AT3G02660.1, AT3G22490.1, AT4G37300.1, AT3G15880.2, AT3G55620.1, AT3G51840.1	6.1e-09	1e-07	Cluster_3
GO:0032787	Biological process	monocarboxylic acid metabolic process	10	2.23214	AT3G16910.1, AT2G43710.2, AT1G13440.1, AT3G24360.1, AT3G15730.1, AT3G13930.1, AT3G45140.1, AT2G33150.1, AT5G42740.1, AT3G51840.1	6.1e-09	1e-07	Cluster_3
GO:0010154	Biological process	fruit development	10	2.23214	AT4G36600.1, AT5G56680.1, AT1G43710.1, AT5G67360.1, AT3G02660.1, AT3G22490.1, AT4G37300.1, AT3G15880.2, AT3G55620.1, AT3G51840.1	1.3e-08	2.2e-07	Cluster_3
GO:0034641	Biological process	cellular nitrogen compound metabolic process	10	2.23214	AT4G12130.1, AT1G43710.1, AT4G13780.1, AT5G54080.1, AT5G22300.1, AT5G17990.1, AT2G27450.2, AT3G02660.1, AT1G69740.1, AT1G49820.1	1.3e-08	2.2e-07	Cluster_3
GO:0006139	Biological process	nucleobase, nucleoside, nucleotide and nucleic acid metabolic process	10	2.23214	AT2G03820.1, AT4G13780.1, AT4G27270.1, AT5G38470.1, AT5G64420.1, AT4G36020.1, AT5G56260.1, AT3G02660.1, AT1G30620.1, AT4G29190.1	0.02	0.13	Cluster_3
GO:0019318	Biological process	hexose metabolic process	9	2.00893	AT1G13440.1, AT3G61610.1, AT3G55410.1, AT5G56350.1, AT1G16300.1, AT1G79550.1, AT5G42740.1, AT3G26720.1, AT1G12000.1	6.2e-11	1.8e-09	Cluster_3
GO:0019438	Biological process	aromatic compound biosynthetic process	9	2.00893	AT3G24503.1, AT5G07990.1, AT2G30490.1, AT5G17990.1, AT4G01900.1, AT2G40890.1, AT5G48930.1, AT2G02990.1, AT5G54160.1	1.2e-09	2.4e-08	Cluster_3
GO:0009793	Biological process	embryonic development ending in seed dormancy	9	2.00893	AT4G36600.1, AT5G56680.1, AT1G43710.1, AT3G02660.1, AT3G22490.1, AT4G37300.1, AT3G15880.2, AT3G55620.1, AT3G51840.1	2.2e-08	3.5e-07	Cluster_3
GO:0009790	Biological process	embryonic development	9	2.00893	AT4G36600.1, AT5G56680.1, AT1G43710.1, AT3G02660.1, AT3G22490.1, AT4G37300.1, AT3G15880.2, AT3G55620.1, AT3G51840.1	3e-08	4.5e-07	Cluster_3
GO:0033036	Biological process	macromolecule localization	9	2.00893	AT4G02510.1, AT1G26690.1, AT1G75850.1, AT3G52850.1, AT1G62500.1, AT2G36070.1, AT3G18570.1, AT2G46520.1, AT5G11710.1	1.3e-07	1.7e-06	Cluster_3
GO:0051707	Biological process	response to other organism	9	2.00893	AT3G12580.1, AT2G43710.2, AT1G53240.1, AT3G51660.1, AT5G57110.1, AT5G09590.1, AT5G52640.1, AT3G45140.1, AT1G08830.1	2.1e-07	2.8e-06	Cluster_3
GO:0019748	Biological process	secondary metabolic process	9	2.00893	AT3G24503.1, AT5G07990.1, AT2G30490.1, AT4G01900.1, AT1G06570.1, AT2G40890.1, AT5G48930.1, AT2G02990.1, AT5G54160.1	0.0062	0.042	Cluster_3
GO:0009607	Biological process	response to biotic stimulus	9	2.00893	AT3G12580.1, AT2G43710.2, AT1G53240.1, AT3G51660.1, AT5G57110.1, AT5G09590.1, AT5G52640.1, AT3G45140.1, AT1G08830.1	0.024	0.15	Cluster_3
GO:0016052	Biological process	carbohydrate catabolic process	8	1.78571	AT1G13440.1, AT3G55410.1, AT5G56350.1, AT1G16300.1, AT2G40840.1, AT1G79550.1, AT5G42740.1, AT1G12000.1	2.7e-10	6.7e-09	Cluster_3
GO:0009611	Biological process	response to wounding	8	1.78571	AT5G20230.1, AT3G51660.1, AT2G30490.1, AT5G09810.1, AT5G14780.1, AT3G45140.1, AT2G33150.1, AT2G02990.1	7e-10	1.5e-08	Cluster_3
GO:0009699	Biological process	phenylpropanoid biosynthetic process	8	1.78571	AT3G24503.1, AT5G07990.1, AT2G30490.1, AT4G01900.1, AT2G40890.1, AT5G48930.1, AT2G02990.1, AT5G54160.1	1.3e-09	2.5e-08	Cluster_3
GO:0009698	Biological process	phenylpropanoid metabolic process	8	1.78571	AT3G24503.1, AT5G07990.1, AT2G30490.1, AT4G01900.1, AT2G40890.1, AT5G48930.1, AT2G02990.1, AT5G54160.1	3e-09	5.3e-08	Cluster_3
GO:0070887	Biological process	cellular response to chemical stimulus	8	1.78571	AT2G36830.1, AT4G01070.1, AT3G15730.1, AT2G19860.1, AT5G52300.1, AT1G08830.1, AT5G18100.1, AT2G02990.1	1.1e-07	1.4e-06	Cluster_3
GO:0044106	Biological process	cellular amine metabolic process	8	1.78571	AT4G12130.1, AT1G43710.1, AT4G13780.1, AT5G54080.1, AT5G17990.1, AT2G27450.2, AT3G02660.1, AT1G49820.1	1.1e-07	1.4e-06	Cluster_3
GO:0046907	Biological process	intracellular transport	8	1.78571	AT4G02510.1, AT1G26690.1, AT1G75850.1, AT3G52850.1, AT2G36070.1, AT4G17170.1, AT2G46520.1, AT5G11710.1	1.6e-06	1.8e-05	Cluster_3
GO:0044275	Biological process	cellular carbohydrate catabolic process	8	1.78571	AT1G13440.1, AT3G55410.1, AT5G56350.1, AT1G16300.1, AT2G40840.1, AT1G79550.1, AT5G42740.1, AT1G12000.1	2.7e-06	2.7e-05	Cluster_3
GO:0006412	Biological process	translation	8	1.78571	AT4G13780.1, AT5G60670.1, AT1G13950.1, AT2G05830.1, AT3G02660.1, AT3G55620.1, AT1G09640.1, AT5G60390.1	3.6e-05	0.0003	Cluster_3
GO:0009737	Biological process	response to abscisic acid stimulus	8	1.78571	AT2G36530.1, AT3G15730.1, AT5G52300.1, AT3G48330.1, AT4G04020.1, AT1G76180.1, AT2G05710.1, AT1G54100.1	0.0025	0.017	Cluster_3
GO:0051649	Biological process	establishment of localization in cell	8	1.78571	AT4G02510.1, AT1G26690.1, AT1G75850.1, AT3G52850.1, AT2G36070.1, AT4G17170.1, AT2G46520.1, AT5G11710.1	0.026	0.16	Cluster_3
GO:0051641	Biological process	cellular localization	8	1.78571	AT4G02510.1, AT1G26690.1, AT1G75850.1, AT3G52850.1, AT2G36070.1, AT4G17170.1, AT2G46520.1, AT5G11710.1	0.041	0.26	Cluster_3
GO:0009414	Biological process	response to water deprivation	7	1.5625	AT5G52300.1, AT2G17840.1, AT2G37170.1, AT4G00430.1, AT1G76180.1, AT3G45140.1, AT1G54100.1	2.8e-08	4.2e-07	Cluster_3
GO:0009415	Biological process	response to water	7	1.5625	AT5G52300.1, AT2G17840.1, AT2G37170.1, AT4G00430.1, AT1G76180.1, AT3G45140.1, AT1G54100.1	6.6e-08	9.3e-07	Cluster_3
GO:0006096	Biological process	glycolysis	7	1.5625	AT1G13440.1, AT3G55410.1, AT5G56350.1, AT1G16300.1, AT1G79550.1, AT5G42740.1, AT1G12000.1	2.5e-07	3.2e-06	Cluster_3
GO:0006886	Biological process	intracellular protein transport	7	1.5625	AT4G02510.1, AT1G26690.1, AT1G75850.1, AT3G52850.1, AT2G36070.1, AT2G46520.1, AT5G11710.1	4.2e-07	5.1e-06	Cluster_3
GO:0034613	Biological process	cellular protein localization	7	1.5625	AT4G02510.1, AT1G26690.1, AT1G75850.1, AT3G52850.1, AT2G36070.1, AT2G46520.1, AT5G11710.1	4.2e-07	5.1e-06	Cluster_3
GO:0070727	Biological process	cellular macromolecule localization	7	1.5625	AT4G02510.1, AT1G26690.1, AT1G75850.1, AT3G52850.1, AT2G36070.1, AT2G46520.1, AT5G11710.1	4.7e-07	5.7e-06	Cluster_3
GO:0006520	Biological process	cellular amino acid metabolic process	7	1.5625	AT4G12130.1, AT1G43710.1, AT4G13780.1, AT5G54080.1, AT5G17990.1, AT3G02660.1, AT1G49820.1	1.6e-06	1.8e-05	Cluster_3
GO:0006007	Biological process	glucose catabolic process	7	1.5625	AT1G13440.1, AT3G55410.1, AT5G56350.1, AT1G16300.1, AT1G79550.1, AT5G42740.1, AT1G12000.1	2.1e-06	2.3e-05	Cluster_3
GO:0045184	Biological process	establishment of protein localization	7	1.5625	AT4G02510.1, AT1G26690.1, AT1G75850.1, AT3G52850.1, AT2G36070.1, AT2G46520.1, AT5G11710.1	2.3e-06	2.3e-05	Cluster_3
GO:0019320	Biological process	hexose catabolic process	7	1.5625	AT1G13440.1, AT3G55410.1, AT5G56350.1, AT1G16300.1, AT1G79550.1, AT5G42740.1, AT1G12000.1	2.3e-06	2.3e-05	Cluster_3
GO:0046365	Biological process	monosaccharide catabolic process	7	1.5625	AT1G13440.1, AT3G55410.1, AT5G56350.1, AT1G16300.1, AT1G79550.1, AT5G42740.1, AT1G12000.1	2.3e-06	2.3e-05	Cluster_3
GO:0015031	Biological process	protein transport	7	1.5625	AT4G02510.1, AT1G26690.1, AT1G75850.1, AT3G52850.1, AT2G36070.1, AT2G46520.1, AT5G11710.1	2.3e-06	2.3e-05	Cluster_3
GO:0006006	Biological process	glucose metabolic process	7	1.5625	AT1G13440.1, AT3G55410.1, AT5G56350.1, AT1G16300.1, AT1G79550.1, AT5G42740.1, AT1G12000.1	2.8e-06	2.7e-05	Cluster_3
GO:0009642	Biological process	response to light intensity	7	1.5625	AT3G12580.1, AT5G20230.1, AT2G17840.1, AT4G12400.2, AT1G74310.1, AT2G32120.1, AT4G04020.1	3.3e-06	3.2e-05	Cluster_3
GO:0046164	Biological process	alcohol catabolic process	7	1.5625	AT1G13440.1, AT3G55410.1, AT5G56350.1, AT1G16300.1, AT1G79550.1, AT5G42740.1, AT1G12000.1	3.3e-06	3.2e-05	Cluster_3
GO:0008104	Biological process	protein localization	7	1.5625	AT4G02510.1, AT1G26690.1, AT1G75850.1, AT3G52850.1, AT2G36070.1, AT2G46520.1, AT5G11710.1	4.3e-06	4.1e-05	Cluster_3
GO:0009644	Biological process	response to high light intensity	6	1.33929	AT3G12580.1, AT2G17840.1, AT4G12400.2, AT4G04020.1, AT2G32120.1, AT1G74310.1	1.3e-09	2.5e-08	Cluster_3
GO:0006631	Biological process	fatty acid metabolic process	6	1.33929	AT2G43710.2, AT3G24360.1, AT3G15730.1, AT3G45140.1, AT2G33150.1, AT3G51840.1	2e-06	2.2e-05	Cluster_3
GO:0000302	Biological process	response to reactive oxygen species	6	1.33929	AT3G12580.1, AT4G12400.2, AT1G74310.1, AT2G32120.1, AT1G08830.1, AT5G18100.1	7.2e-06	6.8e-05	Cluster_3
GO:0009813	Biological process	flavonoid biosynthetic process	6	1.33929	AT5G07990.1, AT2G02990.1, AT2G40890.1, AT5G48930.1, AT4G01900.1, AT5G54160.1	1.8e-05	0.00016	Cluster_3
GO:0009812	Biological process	flavonoid metabolic process	6	1.33929	AT5G07990.1, AT2G02990.1, AT2G40890.1, AT5G48930.1, AT4G01900.1, AT5G54160.1	3.3e-05	0.00029	Cluster_3
GO:0006952	Biological process	defense response	6	1.33929	AT1G19610.1, AT2G43710.2, AT1G53240.1, AT3G51660.1, AT5G52640.1, AT1G08830.1	8.7e-05	0.00071	Cluster_3
GO:0033554	Biological process	cellular response to stress	6	1.33929	AT1G77510.1, AT5G38470.1, AT1G23010.1, AT1G08830.1, AT5G18100.1, AT2G02990.1	0.00015	0.0012	Cluster_3
GO:0046483	Biological process	heterocycle metabolic process	6	1.33929	AT5G17990.1, AT5G14420.1, AT1G06570.1, AT2G40890.1, AT1G69740.1, AT5G54160.1	0.00017	0.0013	Cluster_3
GO:0009617	Biological process	response to bacterium	5	1.11607	AT1G08830.1, AT5G52640.1, AT2G43710.2, AT3G12580.1, AT1G53240.1	8e-06	7.5e-05	Cluster_3
GO:0006605	Biological process	protein targeting	5	1.11607	AT2G46520.1, AT2G36070.1, AT3G52850.1, AT4G02510.1, AT5G11710.1	9.3e-06	8.6e-05	Cluster_3
GO:0055114	Biological process	oxidation reduction	5	1.11607	AT4G04020.1, AT5G24760.1, AT5G64210.1, AT1G22450.1, AT3G56460.1	1.2e-05	0.00011	Cluster_3
GO:0009888	Biological process	tissue development	5	1.11607	AT5G09810.1, AT3G15880.2, AT1G13950.1, AT1G23010.1, AT1G67490.1	0.00012	0.00098	Cluster_3
GO:0016053	Biological process	organic acid biosynthetic process	5	1.11607	AT1G49820.1, AT2G43710.2, AT3G45140.1, AT2G33150.1, AT5G17990.1	0.00017	0.0013	Cluster_3
GO:0046394	Biological process	carboxylic acid biosynthetic process	5	1.11607	AT1G49820.1, AT2G43710.2, AT3G45140.1, AT2G33150.1, AT5G17990.1	0.00017	0.0013	Cluster_3
GO:0009845	Biological process	seed germination	5	1.11607	AT5G09810.1, AT5G67360.1, AT3G48330.1, AT3G15730.1, AT4G13850.1	0.00021	0.0016	Cluster_3
GO:0016054	Biological process	organic acid catabolic process	5	1.11607	AT3G24360.1, AT5G54080.1, AT3G51840.1, AT2G33150.1, AT4G12130.1	0.00045	0.0033	Cluster_3
GO:0046395	Biological process	carboxylic acid catabolic process	5	1.11607	AT3G24360.1, AT5G54080.1, AT3G51840.1, AT2G33150.1, AT4G12130.1	0.00045	0.0033	Cluster_3
GO:0044085	Biological process	cellular component biogenesis	5	1.11607	AT5G60670.1, AT3G23990.1, AT2G46520.1, AT1G30620.1, AT1G71230.1	0.00051	0.0037	Cluster_3
GO:0016051	Biological process	carbohydrate biosynthetic process	5	1.11607	AT5G42740.1, AT1G30620.1, AT2G21170.1, AT5G49190.1, AT1G13440.1	0.00057	0.0041	Cluster_3
GO:0016070	Biological process	RNA metabolic process	5	1.11607	AT3G02660.1, AT5G56260.1, AT4G36020.1, AT2G03820.1, AT4G13780.1	0.046	0.28	Cluster_3
GO:0003824	Molecular function	catalytic activity	140	31.25	AT5G37830.1, AT3G08590.1, AT5G03340.1, AT3G62700.1, AT5G60160.1, AT3G26720.1, AT1G14210.1, AT1G70730.3, AT2G43710.2, AT5G07990.1, AT1G67490.1, AT1G43710.1, AT2G30490.1, AT1G55860.1, AT5G37980.1, AT2G45290.1, AT5G19550.1, AT3G56460.1, AT5G54160.1, AT1G22450.1, AT3G21720.1, AT1G23800.1, AT4G16130.1, AT3G25220.1, AT5G62930.1, AT2G02990.1, AT3G13080.1, AT4G11600.1, AT3G53620.1, AT3G28850.1, AT5G42740…	7.1e-24	9.4e-22	Cluster_3
GO:0005488	Molecular function	binding	96	21.4286	AT4G37370.1, AT4G04210.1, AT5G03340.1, AT3G02300.1, AT5G60160.1, AT3G26720.1, AT1G14210.1, AT1G70730.3, AT5G07990.1, AT5G38470.1, AT1G05520.1, AT5G05670.2, AT5G37980.1, AT3G08590.1, AT3G56460.1, AT1G50590.1, AT2G20680.1, AT4G16130.1, AT3G25220.1, AT5G20230.1, AT3G54110.1, AT4G14300.1, AT3G14690.1, AT3G17880.1, AT4G17170.1, AT5G64420.1, AT2G19860.1, AT1G76180.1, AT3G53390.1, AT2G40840.1, AT5G22060…	0.0032	0.025	Cluster_3
GO:0016491	Molecular function	oxidoreductase activity	45	10.0446	AT3G06050.1, AT3G17880.1, AT1G74920.1, AT1G53240.1, AT4G11600.1, AT1G15140.1, AT1G59960.1, AT5G18100.1, AT1G54100.1, AT2G43710.2, AT1G13440.1, AT5G07990.1, AT4G27270.1, AT5G54080.1, AT2G30490.1, AT5G03290.1, AT5G37980.1, AT1G08830.1, AT3G51840.1, AT3G56460.1, AT1G60420.1, AT2G15620.1, AT1G23740.1, AT1G22450.1, AT4G33420.1, AT5G50850.1, AT1G23800.1, AT3G02360.2, AT1G77120.1, AT4G20840.1, AT3G45140…	8e-30	2.1e-27	Cluster_3
GO:0016787	Molecular function	hydrolase activity	39	8.70536	AT5G37830.1, AT3G15730.1, AT4G17170.1, AT3G22110.1, AT4G15040.1, AT5G03340.1, AT1G53710.1, AT4G34480.1, AT3G62700.1, AT5G60160.1, AT3G26720.1, AT1G14210.1, AT1G79340.1, AT1G12240.1, AT3G51800.2, AT1G67490.1, AT4G32940.1, AT5G67360.1, AT1G47250.1, AT1G48320.1, AT1G11910.1, AT2G36070.1, AT4G33090.1, AT5G12040.1, AT3G24360.1, AT2G20680.1, AT5G57110.1, AT3G10450.1, AT5G22300.1, AT1G74310.1, AT5G26860…	0.0011	0.0093	Cluster_3
GO:0016740	Molecular function	transferase activity	30	6.69643	AT1G34130.1, AT4G01070.1, AT1G03495.1, AT5G64420.1, AT2G19860.1, AT5G52560.1, AT1G60940.1, AT2G40840.1, AT4G15530.5, AT4G12130.1, AT2G45290.1, AT5G19550.1, AT5G54160.1, AT5G41120.1, AT1G79550.1, AT3G48330.1, AT1G22340.1, AT5G17990.1, AT3G13930.1, AT5G11520.1, AT2G33150.1, AT5G48930.1, AT5G23250.1, AT5G49190.1, AT3G13530.1, AT5G56350.1, AT4G16130.1, AT4G33070.1, AT1G49820.1, AT1G12000.1	2e-10	8.2e-09	Cluster_3
GO:0000166	Molecular function	nucleotide binding	27	6.02679	AT4G17170.1, AT1G08410.1, AT2G19860.1, AT5G03340.1, AT3G53390.1, AT2G05830.1, AT5G03290.1, AT2G20420.1, AT4G13780.1, AT4G27270.1, AT3G07770.1, AT1G15340.1, AT3G02660.1, AT1G23100.1, AT1G79930.1, AT4G35860.1, AT1G74310.1, AT3G02360.2, AT4G20840.1, AT4G16130.1, AT2G25140.1, AT2G05710.1, AT3G09440.1, AT3G48990.1, AT3G16910.1, AT5G26860.1, AT4G14300.1	0.0032	0.025	Cluster_3
GO:0017076	Molecular function	purine nucleotide binding	22	4.91071	AT4G17170.1, AT1G08410.1, AT2G19860.1, AT5G03340.1, AT2G05830.1, AT5G03290.1, AT2G20420.1, AT4G13780.1, AT3G07770.1, AT2G05710.1, AT1G23100.1, AT1G79930.1, AT4G35860.1, AT1G74310.1, AT4G20840.1, AT4G16130.1, AT2G25140.1, AT3G02660.1, AT3G09440.1, AT3G48990.1, AT3G16910.1, AT5G26860.1	2e-06	3.8e-05	Cluster_3
GO:0005515	Molecular function	protein binding	22	4.91071	AT4G15040.1, AT3G17880.1, AT4G04210.1, AT3G02300.1, AT5G22060.1, AT3G15880.2, AT2G46520.1, AT4G20260.4, AT1G05520.1, AT2G36070.1, AT4G35470.1, AT5G60390.1, AT1G50590.1, AT1G26690.1, AT1G08110.4, AT5G57110.1, AT5G48570.1, AT3G13930.1, AT3G56490.1, AT1G71230.1, AT5G58040.1, AT2G01680.1	2e-05	0.00025	Cluster_3
GO:0043169	Molecular function	cation binding	21	4.6875	AT1G23740.1, AT1G70730.3, AT4G34480.1, AT5G20230.1, AT5G24760.1, AT3G56490.1, AT4G33420.1, AT1G05520.1, AT4G33070.1, AT1G23010.1, AT5G56350.1, AT1G76180.1, AT1G62810.1, AT5G37980.1, AT3G08590.1, AT5G60160.1, AT1G70670.1, AT3G26720.1, AT4G20260.4, AT2G20680.1, AT3G56460.1	4.5e-13	3e-11	Cluster_3
GO:0043167	Molecular function	ion binding	21	4.6875	AT1G23740.1, AT1G70730.3, AT4G34480.1, AT5G20230.1, AT5G24760.1, AT3G56490.1, AT4G33420.1, AT1G05520.1, AT4G33070.1, AT1G23010.1, AT5G56350.1, AT1G76180.1, AT1G62810.1, AT5G37980.1, AT3G08590.1, AT5G60160.1, AT1G70670.1, AT3G26720.1, AT4G20260.4, AT2G20680.1, AT3G56460.1	4.5e-13	3e-11	Cluster_3
GO:0032555	Molecular function	purine ribonucleotide binding	21	4.6875	AT3G48990.1, AT4G35860.1, AT4G17170.1, AT4G13780.1, AT1G08410.1, AT3G07770.1, AT3G16910.1, AT2G19860.1, AT5G03340.1, AT1G79930.1, AT4G16130.1, AT2G05830.1, AT1G74310.1, AT2G25140.1, AT2G05710.1, AT5G26860.1, AT3G02660.1, AT1G23100.1, AT3G09440.1, AT5G03290.1, AT2G20420.1	6.9e-06	0.00011	Cluster_3
GO:0032553	Molecular function	ribonucleotide binding	21	4.6875	AT3G48990.1, AT4G35860.1, AT4G17170.1, AT4G13780.1, AT1G08410.1, AT3G07770.1, AT3G16910.1, AT2G19860.1, AT5G03340.1, AT1G79930.1, AT4G16130.1, AT2G05830.1, AT1G74310.1, AT2G25140.1, AT2G05710.1, AT5G26860.1, AT3G02660.1, AT1G23100.1, AT3G09440.1, AT5G03290.1, AT2G20420.1	6.9e-06	0.00011	Cluster_3
GO:0046872	Molecular function	metal ion binding	19	4.24107	AT1G23740.1, AT1G70730.3, AT3G56490.1, AT5G20230.1, AT5G24760.1, AT4G33420.1, AT1G05520.1, AT4G33070.1, AT1G23010.1, AT5G56350.1, AT1G76180.1, AT1G62810.1, AT5G37980.1, AT3G08590.1, AT5G60160.1, AT1G70670.1, AT3G26720.1, AT4G20260.4, AT3G56460.1	1.9e-11	1e-09	Cluster_3
GO:0030554	Molecular function	adenyl nucleotide binding	18	4.01786	AT3G48990.1, AT3G16910.1, AT4G13780.1, AT3G07770.1, AT2G19860.1, AT5G03340.1, AT1G79930.1, AT4G20840.1, AT4G16130.1, AT1G74310.1, AT2G25140.1, AT2G05710.1, AT5G26860.1, AT3G02660.1, AT1G23100.1, AT3G09440.1, AT5G03290.1, AT2G20420.1	1e-05	0.00013	Cluster_3
GO:0001883	Molecular function	purine nucleoside binding	18	4.01786	AT3G48990.1, AT3G16910.1, AT4G13780.1, AT3G07770.1, AT2G19860.1, AT5G03340.1, AT1G79930.1, AT4G20840.1, AT4G16130.1, AT1G74310.1, AT2G25140.1, AT2G05710.1, AT5G26860.1, AT3G02660.1, AT1G23100.1, AT3G09440.1, AT5G03290.1, AT2G20420.1	1e-05	0.00013	Cluster_3
GO:0001882	Molecular function	nucleoside binding	18	4.01786	AT3G48990.1, AT3G16910.1, AT4G13780.1, AT3G07770.1, AT2G19860.1, AT5G03340.1, AT1G79930.1, AT4G20840.1, AT4G16130.1, AT1G74310.1, AT2G25140.1, AT2G05710.1, AT5G26860.1, AT3G02660.1, AT1G23100.1, AT3G09440.1, AT5G03290.1, AT2G20420.1	1e-05	0.00013	Cluster_3
GO:0032559	Molecular function	adenyl ribonucleotide binding	17	3.79464	AT3G48990.1, AT3G16910.1, AT4G13780.1, AT3G07770.1, AT2G19860.1, AT5G03340.1, AT1G79930.1, AT4G16130.1, AT1G74310.1, AT2G25140.1, AT2G05710.1, AT5G26860.1, AT3G02660.1, AT1G23100.1, AT3G09440.1, AT5G03290.1, AT2G20420.1	3.6e-05	0.00043	Cluster_3
GO:0005215	Molecular function	transporter activity	16	3.57143	AT1G72160.1, AT1G22450.1, AT5G57110.1, AT3G13080.1, AT1G52190.1, AT1G05520.1, AT5G47450.1, AT3G54110.1, AT4G00430.1, AT2G37170.1, AT1G26690.1, AT2G36070.1, AT3G62700.1, AT2G46520.1, AT2G36830.1, AT4G35300.1	5.3e-07	1.2e-05	Cluster_3
GO:0005524	Molecular function	ATP binding	15	3.34821	AT4G13780.1, AT3G07770.1, AT2G19860.1, AT5G03340.1, AT1G79930.1, AT4G16130.1, AT1G74310.1, AT2G25140.1, AT2G05710.1, AT5G26860.1, AT3G02660.1, AT1G23100.1, AT3G09440.1, AT5G03290.1, AT2G20420.1	0.00038	0.0036	Cluster_3
GO:0046914	Molecular function	transition metal ion binding	14	3.125	AT1G23740.1, AT3G56490.1, AT5G20230.1, AT5G24760.1, AT4G33420.1, AT1G05520.1, AT1G23010.1, AT1G62810.1, AT5G37980.1, AT3G08590.1, AT5G60160.1, AT3G26720.1, AT4G20260.4, AT3G56460.1	2.2e-09	6.6e-08	Cluster_3
GO:0008233	Molecular function	peptidase activity	12	2.67857	AT3G51800.2, AT4G32940.1, AT5G67360.1, AT3G22110.1, AT4G15040.1, AT3G10450.1, AT1G11910.1, AT5G26860.1, AT5G60160.1, AT4G33090.1, AT1G47250.1, AT1G79340.1	0.0018	0.015	Cluster_3
GO:0016853	Molecular function	isomerase activity	11	2.45536	AT1G77510.1, AT1G70730.3, AT3G61610.1, AT3G08590.1, AT2G16600.1, AT5G48570.1, AT2G21170.1, AT5G42740.1, AT3G25220.1, AT1G30620.1, AT5G57655.2	2.3e-10	8.2e-09	Cluster_3
GO:0016772	Molecular function	transferase activity, transferring phosphorus-containing groups	11	2.45536	AT5G56350.1, AT4G15530.5, AT3G13530.1, AT5G64420.1, AT2G19860.1, AT5G52560.1, AT1G60940.1, AT4G16130.1, AT1G79550.1, AT1G49820.1, AT1G12000.1	0.0015	0.013	Cluster_3
GO:0070011	Molecular function	peptidase activity, acting on L-amino acid peptides	10	2.23214	AT3G51800.2, AT4G32940.1, AT5G67360.1, AT3G10450.1, AT4G15040.1, AT1G11910.1, AT5G26860.1, AT5G60160.1, AT4G33090.1, AT1G79340.1	0.0073	0.053	Cluster_3
GO:0016829	Molecular function	lyase activity	9	2.00893	AT2G36530.1, AT1G43710.1, AT1G08110.4, AT3G21720.1, AT5G22300.1, AT3G15620.1, AT4G33070.1, AT2G05710.1, AT1G69740.1	6.2e-08	1.6e-06	Cluster_3
GO:0016301	Molecular function	kinase activity	9	2.00893	AT4G15530.5, AT3G13530.1, AT5G56350.1, AT2G19860.1, AT1G60940.1, AT4G16130.1, AT1G79550.1, AT1G49820.1, AT1G12000.1	0.0087	0.062	Cluster_3
GO:0016903	Molecular function	oxidoreductase activity, acting on the aldehyde or oxo group of donors	8	1.78571	AT3G24503.1, AT1G74920.1, AT3G55410.1, AT5G50850.1, AT1G23800.1, AT1G16300.1, AT1G54100.1, AT1G13440.1	1.7e-07	4e-06	Cluster_3
GO:0016887	Molecular function	ATPase activity	8	1.78571	AT3G13080.1, AT5G57110.1, AT1G74310.1, AT5G03340.1, AT2G36070.1, AT5G26860.1, AT3G62700.1, AT2G25140.1	6e-07	1.2e-05	Cluster_3
GO:0008270	Molecular function	zinc ion binding	8	1.78571	AT1G23740.1, AT5G24760.1, AT1G05520.1, AT5G37980.1, AT5G60160.1, AT3G26720.1, AT3G56490.1, AT3G56460.1	7.7e-05	0.00088	Cluster_3
GO:0016620	Molecular function	oxidoreductase activity, acting on the aldehyde or oxo group of donors, NAD or NADP as acceptor	6	1.33929	AT3G24503.1, AT1G74920.1, AT1G23800.1, AT1G16300.1, AT1G54100.1, AT1G13440.1	2.5e-10	8.2e-09	Cluster_3
GO:0016209	Molecular function	antioxidant activity	6	1.33929	AT3G06050.1, AT4G33420.1, AT4G11600.1, AT1G60420.1, AT1G08830.1, AT5G18100.1	2.9e-06	5.1e-05	Cluster_3
GO:0005516	Molecular function	calmodulin binding	6	1.33929	AT1G50590.1, AT1G08110.4, AT5G57110.1, AT5G48570.1, AT4G20260.4, AT5G60390.1	0.00013	0.0014	Cluster_3
GO:0048037	Molecular function	cofactor binding	6	1.33929	AT4G27270.1, AT3G55410.1, AT1G62810.1, AT3G02360.2, AT4G20840.1, AT4G33070.1	0.0071	0.053	Cluster_3
GO:0016746	Molecular function	transferase activity, transferring acyl groups	6	1.33929	AT5G23250.1, AT5G41120.1, AT1G03495.1, AT3G13930.1, AT2G33150.1, AT5G48930.1	0.023	0.16	Cluster_3
GO:0016758	Molecular function	transferase activity, transferring hexosyl groups	5	1.11607	AT1G22340.1, AT1G34130.1, AT5G49190.1, AT2G40840.1, AT4G01070.1	0.00013	0.0014	Cluster_3
GO:0042623	Molecular function	ATPase activity, coupled	5	1.11607	AT2G36070.1, AT5G57110.1, AT3G62700.1, AT5G26860.1, AT3G13080.1	0.00015	0.0016	Cluster_3
GO:0005198	Molecular function	structural molecule activity	5	1.11607	AT5G60670.1, AT5G09810.1, AT5G19780.1, AT4G04020.1, AT2G46910.1	0.00024	0.0023	Cluster_3
GO:0008135	Molecular function	translation factor activity, nucleic acid binding	5	1.11607	AT1G09640.1, AT3G55620.1, AT1G13950.1, AT2G05830.1, AT5G60390.1	0.00092	0.0084	Cluster_3
GO:0050662	Molecular function	coenzyme binding	5	1.11607	AT4G27270.1, AT3G55410.1, AT4G33070.1, AT4G20840.1, AT3G02360.2	0.01	0.07	Cluster_3
GO:0016747	Molecular function	transferase activity, transferring acyl groups other than amino-acyl groups	5	1.11607	AT5G41120.1, AT1G03495.1, AT3G13930.1, AT5G48930.1, AT2G33150.1	0.047	0.31	Cluster_3
GO:0044464	Cellular component	cell part	171	38.1696	AT4G37370.1, AT5G37830.1, AT3G08590.1, AT5G03340.1, AT4G33270.1, AT1G53280.1, AT3G62700.1, AT5G60160.1, AT3G26720.1, AT1G14210.1, AT1G48320.1, AT1G70730.3, AT5G38470.1, AT1G05520.1, AT2G30490.1, AT5G60670.1, AT1G55860.1, AT5G05670.2, AT3G44100.1, AT2G45290.1, AT5G19550.1, AT3G56460.1, AT5G54160.1, AT1G50940.1, AT1G22450.1, AT1G52190.1, AT1G72160.1, AT5G48540.1, AT3G18570.1, AT1G17860.1, AT1G16030…	1.2e-50	1.3e-48	Cluster_3
GO:0005623	Cellular component	cell	171	38.1696	AT4G37370.1, AT5G37830.1, AT3G08590.1, AT5G03340.1, AT4G33270.1, AT1G53280.1, AT3G62700.1, AT5G60160.1, AT3G26720.1, AT1G14210.1, AT1G48320.1, AT1G70730.3, AT5G38470.1, AT1G05520.1, AT2G30490.1, AT5G60670.1, AT1G55860.1, AT5G05670.2, AT3G44100.1, AT2G45290.1, AT5G19550.1, AT3G56460.1, AT5G54160.1, AT1G50940.1, AT1G22450.1, AT1G52190.1, AT1G72160.1, AT5G48540.1, AT3G18570.1, AT1G17860.1, AT1G16030…	1.2e-50	1.3e-48	Cluster_3
GO:0005622	Cellular component	intracellular	130	29.0179	AT4G37370.1, AT5G37830.1, AT3G08590.1, AT1G53280.1, AT3G62700.1, AT5G60160.1, AT3G26720.1, AT1G70730.3, AT5G38470.1, AT1G05520.1, AT2G30490.1, AT5G60670.1, AT1G55860.1, AT5G05670.2, AT3G44100.1, AT2G45290.1, AT5G19550.1, AT3G56460.1, AT5G54160.1, AT1G50940.1, AT1G22450.1, AT3G18570.1, AT1G16030.1, AT3G13080.1, AT4G11600.1, AT1G53240.1, AT3G54110.1, AT1G15140.1, AT5G47450.1, AT3G22110.1, AT2G19860…	1.2e-18	2.9e-17	Cluster_3
GO:0044424	Cellular component	intracellular part	129	28.7946	AT4G37370.1, AT5G37830.1, AT3G08590.1, AT1G53280.1, AT3G62700.1, AT5G60160.1, AT3G26720.1, AT1G70730.3, AT5G38470.1, AT1G05520.1, AT2G30490.1, AT5G60670.1, AT1G55860.1, AT5G05670.2, AT3G44100.1, AT2G45290.1, AT5G19550.1, AT3G56460.1, AT5G54160.1, AT1G50940.1, AT1G22450.1, AT3G18570.1, AT1G16030.1, AT3G13080.1, AT4G11600.1, AT1G53240.1, AT3G54110.1, AT1G15140.1, AT5G47450.1, AT3G22110.1, AT2G19860…	1.1e-19	4.1e-18	Cluster_3
GO:0005737	Cellular component	cytoplasm	122	27.2321	AT4G37370.1, AT5G37830.1, AT3G08590.1, AT1G53280.1, AT3G62700.1, AT5G60160.1, AT3G26720.1, AT1G70730.3, AT5G09810.1, AT1G05520.1, AT2G30490.1, AT5G60670.1, AT1G55860.1, AT5G05670.2, AT3G44100.1, AT2G45290.1, AT5G19550.1, AT3G56460.1, AT5G54160.1, AT1G50940.1, AT1G22450.1, AT3G18570.1, AT1G16030.1, AT3G13080.1, AT4G11600.1, AT1G53240.1, AT3G54110.1, AT1G15140.1, AT5G47450.1, AT2G19860.1, AT2G21170…	1.4e-27	6.3e-26	Cluster_3
GO:0044444	Cellular component	cytoplasmic part	119	26.5625	AT4G37370.1, AT3G08590.1, AT1G53280.1, AT3G62700.1, AT5G60160.1, AT3G26720.1, AT1G70730.3, AT5G09810.1, AT1G05520.1, AT2G30490.1, AT5G60670.1, AT1G55860.1, AT5G05670.2, AT3G44100.1, AT2G45290.1, AT5G19550.1, AT3G56460.1, AT5G54160.1, AT1G50940.1, AT1G22450.1, AT3G18570.1, AT1G16030.1, AT3G13080.1, AT3G54110.1, AT1G53240.1, AT4G11600.1, AT1G15140.1, AT5G47450.1, AT2G19860.1, AT2G21170.1, AT2G40840…	1.4e-28	7.4e-27	Cluster_3
GO:0043229	Cellular component	intracellular organelle	109	24.3304	AT4G37370.1, AT1G53280.1, AT3G62700.1, AT5G60160.1, AT3G26720.1, AT1G70730.3, AT5G38470.1, AT1G05520.1, AT2G30490.1, AT5G60670.1, AT1G55860.1, AT5G05670.2, AT3G44100.1, AT2G45290.1, AT3G51840.1, AT3G56460.1, AT5G54160.1, AT1G50940.1, AT1G22450.1, AT3G18570.1, AT3G13080.1, AT3G54110.1, AT1G53240.1, AT4G11600.1, AT1G15140.1, AT5G47450.1, AT2G19860.1, AT3G48890.1, AT2G21170.1, AT5G18100.1, AT5G03290…	1.3e-14	2.2e-13	Cluster_3
GO:0043226	Cellular component	organelle	109	24.3304	AT4G37370.1, AT1G53280.1, AT3G62700.1, AT5G60160.1, AT3G26720.1, AT1G70730.3, AT5G38470.1, AT1G05520.1, AT2G30490.1, AT5G60670.1, AT1G55860.1, AT5G05670.2, AT3G44100.1, AT2G45290.1, AT3G51840.1, AT3G56460.1, AT5G54160.1, AT1G50940.1, AT1G22450.1, AT3G18570.1, AT3G13080.1, AT3G54110.1, AT1G53240.1, AT4G11600.1, AT1G15140.1, AT5G47450.1, AT2G19860.1, AT3G48890.1, AT2G21170.1, AT5G18100.1, AT5G03290…	1.3e-14	2.2e-13	Cluster_3
GO:0043227	Cellular component	membrane-bounded organelle	107	23.8839	AT4G37370.1, AT1G53280.1, AT3G62700.1, AT5G60160.1, AT3G26720.1, AT1G70730.3, AT5G38470.1, AT1G05520.1, AT2G30490.1, AT1G55860.1, AT5G05670.2, AT3G44100.1, AT2G45290.1, AT3G51840.1, AT3G56460.1, AT5G54160.1, AT1G50940.1, AT1G22450.1, AT3G18570.1, AT3G13080.1, AT3G54110.1, AT1G53240.1, AT4G11600.1, AT1G15140.1, AT5G47450.1, AT2G19860.1, AT3G48890.1, AT2G21170.1, AT5G18100.1, AT5G03290.1, AT1G13440…	1.2e-15	2.4e-14	Cluster_3
GO:0043231	Cellular component	intracellular membrane-bounded organelle	107	23.8839	AT4G37370.1, AT1G53280.1, AT3G62700.1, AT5G60160.1, AT3G26720.1, AT1G70730.3, AT5G38470.1, AT1G05520.1, AT2G30490.1, AT1G55860.1, AT5G05670.2, AT3G44100.1, AT2G45290.1, AT3G51840.1, AT3G56460.1, AT5G54160.1, AT1G50940.1, AT1G22450.1, AT3G18570.1, AT3G13080.1, AT3G54110.1, AT1G53240.1, AT4G11600.1, AT1G15140.1, AT5G47450.1, AT2G19860.1, AT3G48890.1, AT2G21170.1, AT5G18100.1, AT5G03290.1, AT1G13440…	1.1e-15	2.4e-14	Cluster_3
GO:0016020	Cellular component	membrane	54	12.0536	AT1G26690.1, AT5G14040.1, AT5G47450.1, AT4G00430.1, AT4G33270.1, AT5G14420.1, AT3G62700.1, AT5G60160.1, AT3G26720.1, AT4G20260.4, AT2G29990.1, AT2G46520.1, AT5G19980.1, AT3G13530.1, AT4G27270.1, AT1G05520.1, AT3G15730.1, AT4G33090.1, AT3G24360.1, AT2G36070.1, AT3G44100.1, AT2G17120.1, AT5G12470.1, AT5G60390.1, AT2G21870.1, AT2G36830.1, AT1G52190.1, AT5G57110.1, AT2G37170.1, AT3G52850.1, AT4G20840…	4.7e-06	3.6e-05	Cluster_3
GO:0005739	Cellular component	mitochondrion	43	9.59821	AT3G06050.1, AT3G15730.1, AT5G56680.1, AT1G48030.1, AT1G53240.1, AT3G54110.1, AT5G14040.1, AT2G19860.1, AT2G21170.1, AT2G33150.1, AT5G03290.1, AT2G20420.1, AT1G13440.1, AT1G55860.1, AT4G13850.1, AT3G07770.1, AT2G29990.1, AT5G09810.1, AT2G36070.1, AT2G21870.1, AT3G02660.1, AT5G12470.1, AT5G60390.1, AT2G15620.1, AT1G50940.1, AT1G22450.1, AT1G23100.1, AT5G50850.1, AT5G61030.1, AT3G13930.1, AT2G25140…	8.3e-30	6.1e-28	Cluster_3
GO:0009536	Cellular component	plastid	35	7.8125	AT5G56680.1, AT2G46910.1, AT1G53240.1, AT1G15140.1, AT5G55530.1, AT2G19860.1, AT1G53280.1, AT4G04020.1, AT5G03290.1, AT4G15530.5, AT1G22040.1, AT5G14780.1, AT2G21870.1, AT2G45290.1, AT3G02660.1, AT5G12470.1, AT4G01900.1, AT1G23740.1, AT5G64430.1, AT5G12040.1, AT5G17990.1, AT3G13930.1, AT5G11520.1, AT3G45140.1, AT2G37240.1, AT1G06570.1, AT3G09440.1, AT2G05710.1, AT3G48990.1, AT4G02510.1, AT5G24760…	0.0017	0.0099	Cluster_3
GO:0044422	Cellular component	organelle part	33	7.36607	AT3G06050.1, AT2G46910.1, AT2G36530.1, AT3G54110.1, AT1G15140.1, AT5G47450.1, AT5G14040.1, AT5G19780.1, AT3G62700.1, AT3G62600.1, AT2G46520.1, AT2G29990.1, AT1G05520.1, AT5G60670.1, AT2G36070.1, AT2G21870.1, AT2G45290.1, AT5G12470.1, AT5G11710.1, AT1G23740.1, AT5G64430.1, AT2G36830.1, AT3G52850.1, AT3G13930.1, AT5G09590.1, AT1G71230.1, AT3G23990.1, AT4G02510.1, AT3G13080.1, AT1G48030.1, AT4G04020…	6.7e-19	1.8e-17	Cluster_3
GO:0044446	Cellular component	intracellular organelle part	33	7.36607	AT3G06050.1, AT2G46910.1, AT2G36530.1, AT3G54110.1, AT1G15140.1, AT5G47450.1, AT5G14040.1, AT5G19780.1, AT3G62700.1, AT3G62600.1, AT2G46520.1, AT2G29990.1, AT1G05520.1, AT5G60670.1, AT2G36070.1, AT2G21870.1, AT2G45290.1, AT5G12470.1, AT5G11710.1, AT1G23740.1, AT5G64430.1, AT2G36830.1, AT3G52850.1, AT3G13930.1, AT5G09590.1, AT1G71230.1, AT3G23990.1, AT4G02510.1, AT3G13080.1, AT1G48030.1, AT4G04020…	6.7e-19	1.8e-17	Cluster_3
GO:0009507	Cellular component	chloroplast	32	7.14286	AT5G56680.1, AT2G46910.1, AT1G53240.1, AT1G15140.1, AT5G55530.1, AT1G53280.1, AT4G04020.1, AT5G03290.1, AT4G15530.5, AT1G22040.1, AT2G21870.1, AT2G45290.1, AT3G02660.1, AT5G12470.1, AT4G01900.1, AT1G23740.1, AT5G64430.1, AT5G12040.1, AT5G17990.1, AT3G13930.1, AT3G45140.1, AT2G37240.1, AT1G06570.1, AT3G09440.1, AT2G05710.1, AT3G48990.1, AT4G02510.1, AT5G24760.1, AT5G14040.1, AT5G26860.1, AT5G14780…	0.0035	0.02	Cluster_3
GO:0005829	Cellular component	cytosol	28	6.25	AT3G12580.1, AT3G08590.1, AT5G19780.1, AT2G40840.1, AT1G70730.3, AT1G13440.1, AT4G13780.1, AT5G60670.1, AT1G55860.1, AT5G52640.1, AT1G08830.1, AT5G19550.1, AT5G16970.1, AT5G54160.1, AT2G16600.1, AT4G15530.5, AT1G77120.1, AT5G26860.1, AT1G06570.1, AT4G02510.1, AT3G23990.1, AT1G16030.1, AT3G51030.1, AT3G13530.1, AT4G11600.1, AT1G11360.1, AT1G79550.1, AT4G27450.1	5e-12	6.4e-11	Cluster_3
GO:0005886	Cellular component	plasma membrane	27	6.02679	AT4G33270.1, AT5G14420.1, AT5G60160.1, AT3G26720.1, AT4G20260.4, AT4G32270.1, AT3G13530.1, AT4G27270.1, AT3G15730.1, AT4G33090.1, AT5G60390.1, AT5G57110.1, AT2G37170.1, AT3G52850.1, AT4G20840.1, AT2G01680.1, AT2G04780.1, AT3G56490.1, AT3G09440.1, AT2G05710.1, AT1G72160.1, AT4G27450.1, AT5G14040.1, AT1G11360.1, AT3G28850.1, AT1G09640.1, AT4G35920.1	9.1e-11	1.1e-09	Cluster_3
GO:0032991	Cellular component	macromolecular complex	16	3.57143	AT5G19780.1, AT1G55860.1, AT1G05520.1, AT5G45620.1, AT3G22110.1, AT3G52850.1, AT5G60670.1, AT4G33270.1, AT2G36070.1, AT2G05830.1, AT1G12000.1, AT2G46520.1, AT3G09440.1, AT1G47250.1, AT1G71230.1, AT5G11710.1	5.5e-05	0.00038	Cluster_3
GO:0031975	Cellular component	envelope	14	3.125	AT1G23740.1, AT2G46520.1, AT4G02510.1, AT2G36530.1, AT5G14040.1, AT1G15140.1, AT3G54110.1, AT4G04020.1, AT2G36070.1, AT3G13930.1, AT5G64430.1, AT5G64210.1, AT5G12470.1, AT2G29990.1	7.3e-14	1e-12	Cluster_3
GO:0031967	Cellular component	organelle envelope	14	3.125	AT1G23740.1, AT2G46520.1, AT4G02510.1, AT2G36530.1, AT5G14040.1, AT1G15140.1, AT3G54110.1, AT4G04020.1, AT2G36070.1, AT3G13930.1, AT5G64430.1, AT5G64210.1, AT5G12470.1, AT2G29990.1	7.3e-14	1e-12	Cluster_3
GO:0005634	Cellular component	nucleus	14	3.125	AT1G70730.3, AT2G46520.1, AT2G36530.1, AT5G38470.1, AT3G15730.1, AT4G15530.5, AT3G48890.1, AT1G71230.1, AT2G21870.1, AT5G60390.1, AT4G27450.1, AT1G79930.1, AT5G16970.1, AT5G54160.1	6.1e-09	6.1e-08	Cluster_3
GO:0043234	Cellular component	protein complex	14	3.125	AT1G55860.1, AT1G05520.1, AT5G45620.1, AT3G22110.1, AT3G52850.1, AT5G19780.1, AT4G33270.1, AT2G36070.1, AT2G05830.1, AT1G12000.1, AT2G46520.1, AT1G47250.1, AT1G71230.1, AT5G11710.1	7.4e-07	6.5e-06	Cluster_3
GO:0044425	Cellular component	membrane part	14	3.125	AT5G20230.1, AT1G26690.1, AT1G05520.1, AT3G52850.1, AT4G33270.1, AT2G36070.1, AT4G21150.1, AT3G44100.1, AT2G04780.1, AT2G17120.1, AT3G18570.1, AT2G46520.1, AT2G29990.1, AT4G35920.1	3.2e-06	2.7e-05	Cluster_3
GO:0005618	Cellular component	cell wall	14	3.125	AT5G49190.1, AT1G53240.1, AT5G14040.1, AT3G07770.1, AT2G30490.1, AT5G03340.1, AT4G21150.1, AT3G44100.1, AT2G05710.1, AT3G26720.1, AT3G57880.1, AT3G09440.1, AT1G12000.1, AT1G17860.1	4.4e-06	3.4e-05	Cluster_3
GO:0030312	Cellular component	external encapsulating structure	14	3.125	AT5G49190.1, AT1G53240.1, AT5G14040.1, AT3G07770.1, AT2G30490.1, AT5G03340.1, AT4G21150.1, AT3G44100.1, AT2G05710.1, AT3G26720.1, AT3G57880.1, AT3G09440.1, AT1G12000.1, AT1G17860.1	4.9e-06	3.6e-05	Cluster_3
GO:0005773	Cellular component	vacuole	12	2.67857	AT2G36830.1, AT3G13080.1, AT1G12240.1, AT5G47450.1, AT1G11910.1, AT4G32940.1, AT3G62700.1, AT3G44100.1, AT5G60160.1, AT3G26720.1, AT3G09440.1, AT5G60390.1	1.7e-14	2.7e-13	Cluster_3
GO:0005783	Cellular component	endoplasmic reticulum	12	2.67857	AT4G37370.1, AT1G77510.1, AT1G34130.1, AT1G23010.1, AT2G30490.1, AT1G67490.1, AT5G05670.2, AT4G21150.1, AT3G62600.1, AT2G40890.1, AT5G57655.2, AT3G57880.1	6.3e-05	0.00042	Cluster_3
GO:0031090	Cellular component	organelle membrane	12	2.67857	AT4G02510.1, AT2G36830.1, AT3G13080.1, AT1G05520.1, AT5G47450.1, AT3G54110.1, AT5G14040.1, AT2G36070.1, AT4G21150.1, AT3G62700.1, AT5G12470.1, AT2G29990.1	0.0095	0.053	Cluster_3
GO:0044429	Cellular component	mitochondrial part	10	2.23214	AT3G06050.1, AT2G36530.1, AT3G54110.1, AT1G48030.1, AT3G23990.1, AT2G36070.1, AT5G09590.1, AT5G64210.1, AT5G14040.1, AT2G29990.1	1.8e-10	2.1e-09	Cluster_3
GO:0005576	Cellular component	extracellular region	9	2.00893	AT3G48990.1, AT1G23740.1, AT3G08590.1, AT5G67360.1, AT1G47710.1, AT4G20840.1, AT3G09440.1, AT2G02990.1, AT1G17860.1	0.00035	0.0022	Cluster_3
GO:0005777	Cellular component	peroxisome	7	1.5625	AT3G16910.1, AT3G51660.1, AT1G48320.1, AT5G18100.1, AT3G56490.1, AT3G51840.1, AT3G56460.1	3e-09	3.1e-08	Cluster_3
GO:0042579	Cellular component	microbody	7	1.5625	AT3G16910.1, AT3G51660.1, AT1G48320.1, AT5G18100.1, AT3G56490.1, AT3G51840.1, AT3G56460.1	3e-09	3.1e-08	Cluster_3
GO:0009526	Cellular component	plastid envelope	7	1.5625	AT1G23740.1, AT4G02510.1, AT1G15140.1, AT4G04020.1, AT3G13930.1, AT5G64430.1, AT5G12470.1	1.1e-07	1e-06	Cluster_3
GO:0048046	Cellular component	apoplast	7	1.5625	AT1G23740.1, AT3G48990.1, AT3G08590.1, AT1G47710.1, AT4G20840.1, AT3G09440.1, AT1G17860.1	0.00073	0.0044	Cluster_3
GO:0009941	Cellular component	chloroplast envelope	6	1.33929	AT1G23740.1, AT4G02510.1, AT1G15140.1, AT3G13930.1, AT5G64430.1, AT5G12470.1	7.3e-07	6.5e-06	Cluster_3
GO:0005740	Cellular component	mitochondrial envelope	6	1.33929	AT2G36530.1, AT3G54110.1, AT5G14040.1, AT2G36070.1, AT5G64210.1, AT2G29990.1	3.3e-06	2.7e-05	Cluster_3
GO:0019866	Cellular component	organelle inner membrane	5	1.11607	AT5G14040.1, AT2G36070.1, AT5G12470.1, AT3G54110.1, AT2G29990.1	8e-06	5.7e-05	Cluster_3
GO:0005794	Cellular component	Golgi apparatus	5	1.11607	AT1G05520.1, AT1G30620.1, AT3G52850.1, AT5G19980.1, AT5G11710.1	6.6e-05	0.00043	Cluster_3
GO:0008152	Biological process	metabolic process	199	25.2859	AT5G13110.1, AT5G59420.1, AT3G46440.1, AT5G20990.1, AT5G27600.1, AT5G58420.1, AT5G23240.1, AT1G10760.1, AT1G64660.1, AT1G12050.1, AT3G26720.1, AT5G19740.1, AT4G21585.1, AT5G07990.1, AT4G00230.1, AT3G03250.1, AT3G23490.1, AT4G26910.1, AT4G39120.1, AT2G45790.1, AT5G66680.1, AT3G63250.1, AT3G56460.1, AT5G54160.1, AT1G63500.1, AT3G23530.1, AT3G04690.1, AT1G25510.1, AT1G09690.1, AT4G29680.1, AT5G42650…	4e-17	2.4e-15	Cluster_4
GO:0009987	Biological process	cellular process	194	24.6506	AT4G35410.2, AT5G13110.1, AT2G39700.1, AT3G46440.1, AT5G20990.1, AT5G27600.1, AT4G33270.1, AT5G58420.1, AT5G23240.1, AT1G10760.1, AT1G33590.1, AT1G12050.1, AT3G26720.1, AT4G21585.1, AT5G07990.1, AT5G38470.1, AT3G13870.1, AT3G03250.1, AT3G23490.1, AT4G26910.1, AT4G39120.1, AT4G34490.1, AT2G45790.1, AT5G16880.1, AT5G66680.1, AT4G04950.1, AT3G63250.1, AT5G28060.1, AT1G63500.1, AT5G16620.1, AT3G13920…	3.2e-11	7.9e-10	Cluster_4
GO:0044238	Biological process	primary metabolic process	156	19.8221	AT5G13110.1, AT5G59420.1, AT3G46440.1, AT5G20990.1, AT5G27600.1, AT5G58420.1, AT5G23240.1, AT1G10760.1, AT1G64660.1, AT1G12050.1, AT3G26720.1, AT5G19740.1, AT4G21585.1, AT5G07990.1, AT4G00230.1, AT3G03250.1, AT2G45790.1, AT5G66680.1, AT3G63250.1, AT5G54160.1, AT1G63500.1, AT3G23530.1, AT3G04690.1, AT1G25510.1, AT1G09690.1, AT5G42650.1, AT5G59300.1, AT1G16270.1, AT5G62930.1, AT2G02990.1, AT5G24090…	7.3e-10	1.3e-08	Cluster_4
GO:0044237	Biological process	cellular metabolic process	148	18.8056	AT5G13110.1, AT3G13920.2, AT3G46440.1, AT5G20990.1, AT5G27600.1, AT5G58420.1, AT5G23240.1, AT1G10760.1, AT1G64660.1, AT1G12050.1, AT3G26720.1, AT4G21585.1, AT5G07990.1, AT5G38470.1, AT3G03250.1, AT3G23490.1, AT4G26910.1, AT4G39120.1, AT2G45790.1, AT5G66680.1, AT3G63250.1, AT5G54160.1, AT1G63500.1, AT3G04690.1, AT1G09690.1, AT4G29680.1, AT5G42650.1, AT5G59300.1, AT1G16270.1, AT3G14940.1, AT1G30620…	5.8e-09	9.5e-08	Cluster_4
GO:0050896	Biological process	response to stimulus	111	14.1042	AT3G08590.1, AT5G27600.1, AT1G10760.1, AT1G14210.1, AT5G07990.1, AT5G38470.1, AT3G18190.1, AT3G03250.1, AT4G34131.1, AT4G31820.1, AT1G56340.1, AT5G37980.1, AT1G17880.1, AT3G53420.1, AT5G54800.1, AT3G20390.1, AT5G63890.2, AT1G21750.1, AT5G42650.1, AT3G47520.1, AT2G02990.1, AT2G40300.1, AT5G18170.1, AT5G06860.1, AT5G43060.1, AT4G39230.1, AT1G44170.1, AT1G60950.1, AT5G42740.1, AT4G31750.1, AT4G14880…	1.3e-64	1.8e-61	Cluster_4
GO:0043170	Biological process	macromolecule metabolic process	86	10.9276	AT5G13110.1, AT3G13920.2, AT5G58420.1, AT5G23240.1, AT1G10760.1, AT5G19740.1, AT4G21585.1, AT5G38470.1, AT5G66680.1, AT1G63500.1, AT3G04690.1, AT1G25510.1, AT1G09690.1, AT5G59300.1, AT1G16270.1, AT2G29960.1, AT4G16720.1, AT1G20850.1, AT5G42740.1, AT4G09020.1, AT4G31750.1, AT3G56860.3, AT3G05530.1, AT1G73990.1, AT5G67360.1, AT1G11910.1, AT5G28060.1, AT5G27770.1, AT4G15210.1, AT3G48330.1, AT5G09900…	1.6e-41	5.8e-39	Cluster_4
GO:0006950	Biological process	response to stress	78	9.91105	AT1G20510.1, AT3G06050.1, AT2G13560.1, AT3G12500.1, AT1G53240.1, AT2G26560.1, AT2G36060.2, AT2G37040.1, AT4G00430.1, AT1G23010.1, AT5G27600.1, AT1G76180.1, AT1G59960.1, AT1G10760.1, AT3G47520.1, AT5G63980.1, AT1G14210.1, AT5G49040.1, AT4G20260.4, AT3G61440.1, AT3G29320.1, AT3G12390.1, AT3G03250.1, AT3G04120.1, AT1G11360.1, AT5G59890.1, AT1G11910.1, AT1G65930.1, AT1G56340.1, AT5G37980.1, AT2G27190…	8.1e-57	5.7e-54	Cluster_4
GO:0009058	Biological process	biosynthetic process	73	9.27573	AT1G79750.1, AT1G09570.1, AT5G17920.1, AT3G13920.2, AT2G26560.1, AT5G49040.1, AT2G37040.1, AT3G63250.1, AT1G20510.1, AT5G58420.1, AT1G13950.1, AT2G05830.1, AT5G51820.1, AT1G05010.1, AT5G63980.1, AT3G43190.1, AT1G05190.1, AT5G53850.2, AT5G07990.1, AT2G29570.1, AT4G27270.1, AT1G77590.1, AT3G04120.1, AT3G11400.2, AT1G06410.1, AT4G37870.1, AT5G28060.1, AT5G66680.1, AT1G30620.1, AT2G38280.1, AT1G12840…	4e-35	9.2e-33	Cluster_4
GO:0044249	Biological process	cellular biosynthetic process	69	8.76747	AT1G79750.1, AT1G09570.1, AT5G17920.1, AT3G13920.2, AT2G26560.1, AT5G49040.1, AT2G37040.1, AT3G63250.1, AT1G20510.1, AT5G58420.1, AT1G13950.1, AT2G05830.1, AT5G51820.1, AT1G05010.1, AT5G63980.1, AT3G43190.1, AT1G05190.1, AT5G53850.2, AT5G07990.1, AT2G29570.1, AT4G27270.1, AT1G77590.1, AT3G04120.1, AT3G11400.2, AT1G06410.1, AT4G37870.1, AT5G28060.1, AT5G66680.1, AT1G30620.1, AT2G38280.1, AT1G12840…	4.4e-34	7.6e-32	Cluster_4
GO:0044260	Biological process	cellular macromolecule metabolic process	64	8.13215	AT5G13110.1, AT3G13920.2, AT3G04120.1, AT2G36060.2, AT5G20990.1, AT5G59300.1, AT5G58420.1, AT1G13950.1, AT5G23240.1, AT1G10760.1, AT3G57830.1, AT3G62600.1, AT5G63980.1, AT5G08100.1, AT1G05190.1, AT3G05530.1, AT4G21585.1, AT2G29570.1, AT4G27270.1, AT5G40760.1, AT5G56350.1, AT3G09630.1, AT5G56260.1, AT5G28060.1, AT5G66680.1, AT5G48380.1, AT5G47810.1, AT5G19990.1, AT4G29040.1, AT4G34670.1, AT3G56860…	2.3e-26	2.4e-24	Cluster_4
GO:0019538	Biological process	protein metabolic process	61	7.75095	AT4G15040.1, AT3G13920.2, AT5G20990.1, AT5G59300.1, AT5G58420.1, AT1G13950.1, AT2G05830.1, AT3G57830.1, AT3G02090.2, AT3G62600.1, AT4G23570.3, AT5G19740.1, AT1G05190.1, AT3G05530.1, AT4G14570.1, AT4G00230.1, AT5G59090.1, AT1G73990.1, AT5G67360.1, AT1G11910.1, AT5G28060.1, AT3G63470.1, AT5G66680.1, AT1G02305.1, AT5G48380.1, AT5G19990.1, AT4G29040.1, AT4G34670.1, AT1G63500.1, AT5G27770.1, AT4G36195…	3e-43	1.4e-40	Cluster_4
GO:0042221	Biological process	response to chemical stimulus	55	6.98856	AT1G09570.1, AT3G06050.1, AT1G15520.1, AT4G01070.1, AT1G53240.1, AT3G08590.1, AT5G20990.1, AT2G37040.1, AT4G00430.1, AT5G27600.1, AT1G76180.1, AT3G04120.1, AT5G63980.1, AT3G56860.3, AT3G61440.1, AT3G29320.1, AT1G65930.1, AT3G18190.1, AT1G61800.1, AT5G08680.1, AT1G56340.1, AT5G37980.1, AT1G08830.1, AT2G05710.1, AT3G53420.1, AT4G29040.1, AT4G33420.1, AT3G47340.1, AT2G37170.1, AT3G20390.1, AT3G48330…	1.2e-33	1.8e-31	Cluster_4
GO:0009628	Biological process	response to abiotic stimulus	52	6.60737	AT1G09570.1, AT2G13560.1, AT1G53240.1, AT1G58440.1, AT4G00430.1, AT5G27600.1, AT2G42810.2, AT1G59960.1, AT1G10760.1, AT5G63980.1, AT1G14210.1, AT4G20260.4, AT5G07990.1, AT3G29320.1, AT3G12390.1, AT1G73990.1, AT4G13850.1, AT3G04120.1, AT1G11910.1, AT4G31820.1, AT1G65930.1, AT1G08830.1, AT2G05710.1, AT1G17880.1, AT3G53420.1, AT5G46180.1, AT4G29040.1, AT1G23740.1, AT5G62530.1, AT3G47340.1, AT2G37170…	5.9e-37	1.7e-34	Cluster_4
GO:0032502	Biological process	developmental process	44	5.59085	AT4G26690.1, AT1G78900.1, AT2G39700.1, AT5G47530.1, AT1G63180.1, AT1G07890.3, AT1G13950.1, AT1G79230.1, AT5G63980.1, AT4G34200.1, AT1G05190.1, AT2G19760.1, AT3G05530.1, AT3G13870.1, AT5G67360.1, AT3G04120.1, AT3G18130.1, AT2G22250.2, AT4G31820.1, AT4G34490.1, AT4G29010.1, AT5G66680.1, AT1G21750.1, AT2G02850.1, AT4G13850.1, AT1G18800.1, AT1G12840.1, AT5G54800.1, AT3G48330.1, AT5G63890.2, AT5G49360…	2.8e-19	2.2e-17	Cluster_4
GO:0006807	Biological process	nitrogen compound metabolic process	44	5.59085	AT5G13110.1, AT2G19570.1, AT5G17920.1, AT3G46440.1, AT2G36060.2, AT1G64660.1, AT1G12050.1, AT5G63980.1, AT3G56860.3, AT5G53850.2, AT4G21585.1, AT3G61440.1, AT2G29570.1, AT4G27270.1, AT5G40760.1, AT3G23490.1, AT5G62530.1, AT5G56260.1, AT4G29680.1, AT2G36310.1, AT1G30620.1, AT2G38280.1, AT3G63250.1, AT5G46180.1, AT5G18170.1, AT1G05010.1, AT3G47340.1, AT5G37600.1, AT5G20990.1, AT4G38800.1, AT5G23300…	3.1e-16	1.7e-14	Cluster_4
GO:0009056	Biological process	catabolic process	42	5.33672	AT5G13110.1, AT2G19570.1, AT4G01070.1, AT3G04120.1, AT1G06290.1, AT1G79440.1, AT5G59300.1, AT4G26270.1, AT1G10760.1, AT1G64660.1, AT5G43280.1, AT5G63980.1, AT5G08100.1, AT3G14940.1, AT3G05530.1, AT4G21585.1, AT5G40760.1, AT5G62530.1, AT4G26910.1, AT2G44350.2, AT4G29010.1, AT2G36310.1, AT5G47810.1, AT5G19990.1, AT5G46180.1, AT3G47340.1, AT4G15210.1, AT5G09900.3, AT3G14290.1, AT3G58750.1, AT4G23570…	4.6e-35	9.2e-33	Cluster_4
GO:0044267	Biological process	cellular protein metabolic process	41	5.20966	AT3G13920.2, AT5G20990.1, AT5G59300.1, AT5G58420.1, AT1G13950.1, AT5G23240.1, AT3G57830.1, AT3G62600.1, AT1G05190.1, AT3G05530.1, AT1G76400.1, AT5G28060.1, AT5G66680.1, AT5G48380.1, AT5G19990.1, AT4G34670.1, AT1G63500.1, AT5G27770.1, AT5G09900.3, AT3G04690.1, AT3G09630.1, AT3G48330.1, AT3G14290.1, AT4G23570.3, AT4G38630.1, AT1G16270.1, AT1G09690.1, AT3G09440.1, AT2G29960.1, AT1G56140.1, AT2G17200…	8.8e-25	8.8e-23	Cluster_4
GO:0044248	Biological process	cellular catabolic process	41	5.20966	AT5G13110.1, AT2G19570.1, AT4G01070.1, AT3G04120.1, AT1G06290.1, AT1G79440.1, AT5G59300.1, AT4G26270.1, AT1G10760.1, AT1G64660.1, AT5G43280.1, AT5G63980.1, AT3G14940.1, AT3G05530.1, AT4G21585.1, AT5G40760.1, AT5G62530.1, AT4G26910.1, AT2G44350.2, AT4G29010.1, AT2G36310.1, AT5G47810.1, AT5G19990.1, AT5G46180.1, AT3G47340.1, AT4G15210.1, AT5G09900.3, AT3G14290.1, AT3G58750.1, AT4G23570.3, AT4G38630…	5.7e-17	3.3e-15	Cluster_4
GO:0065007	Biological process	biological regulation	40	5.08259	AT4G26690.1, AT4G15040.1, AT2G39700.1, AT5G59890.1, AT5G65980.1, AT5G63980.1, AT4G38630.1, AT3G56860.3, AT2G19760.1, AT2G29570.1, AT4G27270.1, AT3G13870.1, AT5G56260.1, AT4G31820.1, AT4G34490.1, AT5G42150.1, AT5G66680.1, AT1G21750.1, AT4G36760.1, AT4G04950.1, AT1G12840.1, AT5G20990.1, AT4G35090.1, AT5G54140.1, AT1G02305.1, AT2G42810.2, AT1G33590.1, AT5G48930.1, AT2G02990.1, AT5G06860.1, AT1G09570…	1.1e-10	2.6e-09	Cluster_4
GO:0005975	Biological process	carbohydrate metabolic process	39	4.95553	AT4G26690.1, AT5G13110.1, AT3G46440.1, AT5G24090.1, AT4G34480.1, AT1G10760.1, AT5G20950.1, AT3G26720.1, AT3G43190.1, AT2G20680.1, AT1G76400.1, AT3G03250.1, AT5G40760.1, AT1G06410.1, AT4G37870.1, AT2G45790.1, AT5G66680.1, AT3G26380.1, AT1G30620.1, AT5G47810.1, AT3G04120.1, AT1G65590.1, AT1G13700.1, AT3G61610.1, AT4G26270.1, AT4G15210.1, AT5G03650.1, AT4G02280.1, AT1G73370.1, AT2G35840.1, AT2G14750…	4.1e-13	1.5e-11	Cluster_4
GO:0032501	Biological process	multicellular organismal process	36	4.57433	AT4G26690.1, AT1G78900.1, AT4G13850.1, AT5G47530.1, AT3G04120.1, AT1G63180.1, AT1G07890.3, AT1G13950.1, AT5G63980.1, AT4G34200.1, AT1G05190.1, AT3G05530.1, AT3G13870.1, AT5G67360.1, AT1G61800.1, AT3G18130.1, AT2G22250.2, AT4G31820.1, AT4G29010.1, AT1G21750.1, AT2G02850.1, AT1G18800.1, AT5G54800.1, AT5G09900.3, AT5G63890.2, AT5G49360.1, AT3G48330.1, AT3G06350.1, AT4G38630.1, AT1G09570.1, AT2G38280…	1.6e-14	6.9e-13	Cluster_4
GO:0006810	Biological process	transport	35	4.44727	AT4G35410.2, AT4G11790.1, AT1G78900.1, AT1G61800.1, AT4G00430.1, AT2G38410.1, AT5G65980.1, AT5G57490.1, AT1G05520.1, AT3G13870.1, AT1G15520.1, AT4G31820.1, AT2G44100.1, AT4G36760.1, AT5G16880.1, AT3G53420.1, AT5G11710.1, AT5G16620.1, AT3G01280.1, AT3G60190.1, AT1G52190.1, AT1G27970.2, AT2G37170.1, AT2G20760.1, AT2G27600.1, AT5G55190.1, AT2G42810.2, AT1G72160.1, AT2G40300.1, AT3G06720.1, AT2G28900…	1.6e-13	6.3e-12	Cluster_4
GO:0051234	Biological process	establishment of localization	35	4.44727	AT4G35410.2, AT4G11790.1, AT1G78900.1, AT1G61800.1, AT4G00430.1, AT2G38410.1, AT5G65980.1, AT5G57490.1, AT1G05520.1, AT3G13870.1, AT1G15520.1, AT4G31820.1, AT2G44100.1, AT4G36760.1, AT5G16880.1, AT3G53420.1, AT5G11710.1, AT5G16620.1, AT3G01280.1, AT3G60190.1, AT1G52190.1, AT1G27970.2, AT2G37170.1, AT2G20760.1, AT2G27600.1, AT5G55190.1, AT2G42810.2, AT1G72160.1, AT2G40300.1, AT3G06720.1, AT2G28900…	2e-13	7.9e-12	Cluster_4
GO:0051179	Biological process	localization	35	4.44727	AT4G35410.2, AT4G11790.1, AT1G78900.1, AT1G61800.1, AT4G00430.1, AT2G38410.1, AT5G65980.1, AT5G57490.1, AT1G05520.1, AT3G13870.1, AT1G15520.1, AT4G31820.1, AT2G44100.1, AT4G36760.1, AT5G16880.1, AT3G53420.1, AT5G11710.1, AT5G16620.1, AT3G01280.1, AT3G60190.1, AT1G52190.1, AT1G27970.2, AT2G37170.1, AT2G20760.1, AT2G27600.1, AT5G55190.1, AT2G42810.2, AT1G72160.1, AT2G40300.1, AT3G06720.1, AT2G28900…	6.5e-13	2.3e-11	Cluster_4
GO:0006082	Biological process	organic acid metabolic process	35	4.44727	AT3G58750.1, AT5G17920.1, AT2G26560.1, AT5G14590.1, AT5G27600.1, AT1G64660.1, AT1G12050.1, AT5G43280.1, AT2G13560.1, AT5G53850.2, AT3G61440.1, AT4G00570.1, AT1G05010.1, AT1G77590.1, AT3G04120.1, AT1G20510.1, AT3G23490.1, AT5G62530.1, AT4G37870.1, AT2G45790.1, AT4G29010.1, AT1G79750.1, AT1G06290.1, AT5G46180.1, AT3G47340.1, AT1G74960.2, AT3G13930.1, AT5G42650.1, AT4G01850.1, AT4G38800.1, AT1G76690…	1.7e-11	4.5e-10	Cluster_4
GO:0007275	Biological process	multicellular organismal development	34	4.3202	AT4G26690.1, AT1G78900.1, AT4G13850.1, AT5G47530.1, AT1G63180.1, AT1G07890.3, AT1G13950.1, AT5G63980.1, AT4G34200.1, AT1G05190.1, AT3G05530.1, AT3G13870.1, AT5G67360.1, AT3G04120.1, AT3G18130.1, AT2G22250.2, AT4G31820.1, AT4G29010.1, AT1G21750.1, AT2G02850.1, AT1G18800.1, AT5G54800.1, AT5G09900.3, AT5G63890.2, AT5G49360.1, AT3G48330.1, AT3G06350.1, AT4G38630.1, AT2G38280.1, AT2G17420.1, AT2G40300…	1.4e-13	5.9e-12	Cluster_4
GO:0043436	Biological process	oxoacid metabolic process	34	4.3202	AT3G58750.1, AT5G17920.1, AT2G26560.1, AT5G14590.1, AT5G27600.1, AT1G64660.1, AT1G12050.1, AT5G43280.1, AT2G13560.1, AT5G53850.2, AT3G61440.1, AT4G00570.1, AT1G05010.1, AT1G77590.1, AT3G04120.1, AT1G20510.1, AT5G62530.1, AT4G37870.1, AT2G45790.1, AT4G29010.1, AT1G79750.1, AT1G06290.1, AT5G46180.1, AT3G47340.1, AT1G74960.2, AT3G13930.1, AT5G42650.1, AT4G01850.1, AT4G38800.1, AT1G76690.1, AT1G79440…	6.9e-11	1.7e-09	Cluster_4
GO:0019752	Biological process	carboxylic acid metabolic process	34	4.3202	AT3G58750.1, AT5G17920.1, AT2G26560.1, AT5G14590.1, AT5G27600.1, AT1G64660.1, AT1G12050.1, AT5G43280.1, AT2G13560.1, AT5G53850.2, AT3G61440.1, AT4G00570.1, AT1G05010.1, AT1G77590.1, AT3G04120.1, AT1G20510.1, AT5G62530.1, AT4G37870.1, AT2G45790.1, AT4G29010.1, AT1G79750.1, AT1G06290.1, AT5G46180.1, AT3G47340.1, AT1G74960.2, AT3G13930.1, AT5G42650.1, AT4G01850.1, AT4G38800.1, AT1G76690.1, AT1G79440…	6.9e-11	1.7e-09	Cluster_4
GO:0042180	Biological process	cellular ketone metabolic process	34	4.3202	AT3G58750.1, AT5G17920.1, AT2G26560.1, AT5G14590.1, AT5G27600.1, AT1G64660.1, AT1G12050.1, AT5G43280.1, AT2G13560.1, AT5G53850.2, AT3G61440.1, AT4G00570.1, AT1G05010.1, AT1G77590.1, AT3G04120.1, AT1G20510.1, AT5G62530.1, AT4G37870.1, AT2G45790.1, AT4G29010.1, AT1G79750.1, AT1G06290.1, AT5G46180.1, AT3G47340.1, AT1G74960.2, AT3G13930.1, AT5G42650.1, AT4G01850.1, AT4G38800.1, AT1G76690.1, AT1G79440…	1.2e-10	2.8e-09	Cluster_4
GO:0048856	Biological process	anatomical structure development	31	3.93901	AT4G26690.1, AT2G39700.1, AT2G22250.2, AT1G07890.3, AT1G13950.1, AT5G63980.1, AT1G05190.1, AT2G19760.1, AT3G13870.1, AT5G67360.1, AT3G04120.1, AT3G18130.1, AT4G31820.1, AT4G34490.1, AT4G29010.1, AT5G66680.1, AT1G21750.1, AT2G02850.1, AT1G18800.1, AT1G12840.1, AT5G09900.3, AT5G49360.1, AT3G06350.1, AT4G38630.1, AT2G38280.1, AT2G17420.1, AT2G40300.1, AT1G62440.1, AT1G23010.1, AT4G29040.1, AT5G37510…	3.9e-16	2e-14	Cluster_4
GO:0006508	Biological process	proteolysis	31	3.93901	AT4G15040.1, AT5G59300.1, AT3G02090.2, AT5G19740.1, AT3G05530.1, AT4G14570.1, AT4G00230.1, AT5G59090.1, AT1G73990.1, AT5G67360.1, AT1G11910.1, AT1G02305.1, AT5G19990.1, AT4G36195.1, AT5G09900.3, AT1G25510.1, AT3G14290.1, AT5G54140.1, AT2G21430.1, AT2G47390.1, AT4G38630.1, AT2G27920.1, AT4G17510.1, AT1G20850.1, AT2G20580.1, AT4G29040.1, AT1G16470.1, AT4G20850.1, AT5G60360.3, AT4G23570.3, AT3G63470…	6.2e-09	9.9e-08	Cluster_4
GO:0044262	Biological process	cellular carbohydrate metabolic process	30	3.81194	AT4G26690.1, AT5G13110.1, AT3G46440.1, AT4G26270.1, AT1G10760.1, AT3G04120.1, AT3G26720.1, AT3G43190.1, AT1G76400.1, AT3G03250.1, AT5G40760.1, AT1G06410.1, AT4G37870.1, AT2G45790.1, AT5G66680.1, AT1G30620.1, AT5G47810.1, AT3G61610.1, AT4G15210.1, AT5G03650.1, AT4G02280.1, AT1G73370.1, AT2G35840.1, AT2G14750.1, AT5G56350.1, AT2G22480.1, AT5G42740.1, AT4G09020.1, AT4G17770.1, AT5G51820.1	1e-28	1.4e-26	Cluster_4
GO:0050789	Biological process	regulation of biological process	25	3.17662	AT5G59890.1, AT4G33270.1, AT5G63980.1, AT4G38630.1, AT3G56860.3, AT2G29570.1, AT4G27270.1, AT4G31820.1, AT5G56260.1, AT5G42150.1, AT1G21750.1, AT4G04950.1, AT5G20990.1, AT4G35090.1, AT2G42810.2, AT1G33590.1, AT5G48930.1, AT2G02990.1, AT5G06860.1, AT1G09570.1, AT2G17420.1, AT2G14750.1, AT3G12500.1, AT2G20580.1, AT4G29040.1	8.9e-05	0.00076	Cluster_4
GO:0009057	Biological process	macromolecule catabolic process	25	3.17662	AT5G13110.1, AT3G04120.1, AT4G38630.1, AT4G26270.1, AT1G10760.1, AT5G63980.1, AT5G08100.1, AT3G05530.1, AT4G21585.1, AT5G40760.1, AT5G47810.1, AT5G19990.1, AT4G15210.1, AT5G09900.3, AT3G14290.1, AT4G09020.1, AT5G59300.1, AT4G17510.1, AT2G20580.1, AT4G29040.1, AT5G56350.1, AT1G16470.1, AT5G42740.1, AT4G23570.3, AT2G22480.1	0.00015	0.0012	Cluster_4
GO:0044265	Biological process	cellular macromolecule catabolic process	24	3.04956	AT5G13110.1, AT3G04120.1, AT4G38630.1, AT4G26270.1, AT1G10760.1, AT5G63980.1, AT3G05530.1, AT4G21585.1, AT5G40760.1, AT5G47810.1, AT5G19990.1, AT4G15210.1, AT5G09900.3, AT3G14290.1, AT4G09020.1, AT5G59300.1, AT4G17510.1, AT2G20580.1, AT4G29040.1, AT5G56350.1, AT1G16470.1, AT5G42740.1, AT4G23570.3, AT2G22480.1	2.6e-28	3.3e-26	Cluster_4
GO:0034641	Biological process	cellular nitrogen compound metabolic process	24	3.04956	AT5G13110.1, AT2G19570.1, AT5G17920.1, AT1G64660.1, AT1G05010.1, AT5G53850.2, AT3G61440.1, AT5G40760.1, AT3G23490.1, AT5G62530.1, AT1G12050.1, AT2G36310.1, AT3G63250.1, AT5G46180.1, AT3G47340.1, AT5G20990.1, AT5G23300.1, AT4G01850.1, AT4G38800.1, AT1G79440.1, AT3G51450.1, AT1G69740.1, AT4G14880.1, AT4G01690.1	1.2e-21	1.1e-19	Cluster_4
GO:0009059	Biological process	macromolecule biosynthetic process	23	2.92249	AT3G13920.2, AT5G58420.1, AT1G13950.1, AT2G05830.1, AT5G51820.1, AT5G63980.1, AT1G05190.1, AT2G29570.1, AT1G76400.1, AT5G28060.1, AT5G66680.1, AT4G34670.1, AT5G27770.1, AT3G09630.1, AT1G09690.1, AT5G03650.1, AT1G09570.1, AT2G17420.1, AT4G16720.1, AT3G55280.1, AT4G27270.1, AT3G11400.2, AT5G47700.1	5.5e-07	6.7e-06	Cluster_4
GO:0009607	Biological process	response to biotic stimulus	23	2.92249	AT1G53240.1, AT2G26560.1, AT5G59890.1, AT1G10760.1, AT1G05010.1, AT3G14310.1, AT5G57490.1, AT1G15520.1, AT4G34131.1, AT5G52450.1, AT1G08830.1, AT2G42010.1, AT3G01280.1, AT3G60190.1, AT4G15210.1, AT5G54800.1, AT3G60240.4, AT5G42650.1, AT4G38630.1, AT3G12500.1, AT4G29040.1, AT1G61800.1, AT4G31750.1	8.2e-07	9.8e-06	Cluster_4
GO:0006519	Biological process	cellular amino acid and derivative metabolic process	23	2.92249	AT5G17920.1, AT5G49040.1, AT2G37040.1, AT1G64660.1, AT1G05010.1, AT5G53850.2, AT5G07990.1, AT1G20510.1, AT5G62530.1, AT1G12050.1, AT3G63250.1, AT5G46180.1, AT5G54160.1, AT3G47340.1, AT1G12840.1, AT3G61440.1, AT5G48930.1, AT2G02990.1, AT4G01850.1, AT4G38800.1, AT3G50740.1, AT1G79440.1, AT4G14880.1	1e-06	1.2e-05	Cluster_4
GO:0009791	Biological process	post-embryonic development	23	2.92249	AT4G26690.1, AT4G13850.1, AT2G22250.2, AT1G07890.3, AT5G63980.1, AT1G05190.1, AT5G67360.1, AT3G04120.1, AT4G31820.1, AT4G29010.1, AT1G21750.1, AT2G02850.1, AT1G18800.1, AT5G09900.3, AT3G48330.1, AT3G06350.1, AT4G38630.1, AT5G49360.1, AT2G38280.1, AT2G17420.1, AT2G40300.1, AT4G29040.1, AT5G37510.2	1.7e-06	1.9e-05	Cluster_4
GO:0006139	Biological process	nucleobase, nucleoside, nucleotide and nucleic acid metabolic process	23	2.92249	AT5G13110.1, AT2G19570.1, AT3G46440.1, AT2G36060.2, AT5G63980.1, AT3G56860.3, AT4G21585.1, AT2G29570.1, AT4G27270.1, AT5G40760.1, AT5G56260.1, AT4G29680.1, AT2G36310.1, AT1G30620.1, AT2G38280.1, AT4G38800.1, AT5G23300.1, AT4G01850.1, AT1G09570.1, AT1G10700.1, AT5G38470.1, AT3G55010.1, AT2G33040.1	5.8e-06	6.1e-05	Cluster_4
GO:0050794	Biological process	regulation of cellular process	23	2.92249	AT5G59890.1, AT4G33270.1, AT5G63980.1, AT3G56860.3, AT2G29570.1, AT4G27270.1, AT5G56260.1, AT5G42150.1, AT1G21750.1, AT4G04950.1, AT5G20990.1, AT4G35090.1, AT2G42810.2, AT1G33590.1, AT5G48930.1, AT2G02990.1, AT5G06860.1, AT1G09570.1, AT2G17420.1, AT2G14750.1, AT3G12500.1, AT2G20580.1, AT4G29040.1	6.3e-05	0.00056	Cluster_4
GO:0009266	Biological process	response to temperature stimulus	22	2.79543	AT4G13850.1, AT1G76180.1, AT5G51820.1, AT4G20260.4, AT5G63980.1, AT5G38470.1, AT1G53240.1, AT3G04120.1, AT2G28900.1, AT1G23740.1, AT4G35090.1, AT1G63940.2, AT4G38630.1, AT3G47520.1, AT3G09440.1, AT1G07890.3, AT3G29320.1, AT1G79440.1, AT3G55280.1, AT4G29040.1, AT5G67590.1, AT1G10760.1	5.8e-24	5.4e-22	Cluster_4
GO:0034645	Biological process	cellular macromolecule biosynthetic process	22	2.79543	AT3G13920.2, AT5G58420.1, AT1G13950.1, AT2G05830.1, AT5G51820.1, AT5G63980.1, AT1G05190.1, AT2G29570.1, AT4G27270.1, AT5G28060.1, AT5G66680.1, AT4G34670.1, AT5G27770.1, AT3G09630.1, AT1G09690.1, AT5G03650.1, AT1G09570.1, AT4G16720.1, AT3G55280.1, AT1G76400.1, AT3G11400.2, AT5G47700.1	1.8e-06	1.9e-05	Cluster_4
GO:0051704	Biological process	multi-organism process	22	2.79543	AT1G53240.1, AT2G26560.1, AT5G59890.1, AT1G10760.1, AT1G05010.1, AT3G14310.1, AT5G57490.1, AT1G61800.1, AT4G34131.1, AT5G52450.1, AT1G08830.1, AT2G02850.1, AT2G42010.1, AT3G01280.1, AT3G60190.1, AT4G15210.1, AT5G54800.1, AT3G60240.4, AT5G42650.1, AT2G17420.1, AT3G12500.1, AT4G31750.1	5.2e-05	0.00048	Cluster_4
GO:0051716	Biological process	cellular response to stimulus	22	2.79543	AT4G01070.1, AT2G26560.1, AT2G36060.2, AT4G38630.1, AT5G63980.1, AT3G56860.3, AT2G29570.1, AT3G03250.1, AT2G27190.1, AT1G21750.1, AT3G54960.1, AT3G47340.1, AT5G20990.1, AT4G35090.1, AT1G08830.1, AT2G42810.2, AT2G02990.1, AT1G09570.1, AT3G12500.1, AT5G38470.1, AT1G23010.1, AT3G52880.2	8.2e-05	0.00071	Cluster_4
GO:0010035	Biological process	response to inorganic substance	21	2.66836	AT3G48990.1, AT2G35840.1, AT2G40300.1, AT3G18190.1, AT1G53240.1, AT1G65930.1, AT3G08590.1, AT4G39230.1, AT1G07890.3, AT3G20390.1, AT5G08680.1, AT1G09570.1, AT1G08830.1, AT5G13420.1, AT3G04120.1, AT5G42740.1, AT2G05710.1, AT4G35090.1, AT3G09440.1, AT4G14880.1, AT3G52880.2	5.3e-27	6.1e-25	Cluster_4
GO:0006970	Biological process	response to osmotic stress	21	2.66836	AT4G13850.1, AT5G62530.1, AT5G43060.1, AT5G67590.1, AT1G53240.1, AT3G12390.1, AT1G44170.1, AT1G08830.1, AT3G48330.1, AT5G27600.1, AT1G11910.1, AT1G65930.1, AT1G59960.1, AT5G46180.1, AT4G38630.1, AT2G05710.1, AT5G63980.1, AT1G17880.1, AT1G14210.1, AT1G15690.1, AT2G13560.1	3.9e-19	2.9e-17	Cluster_4
GO:0051707	Biological process	response to other organism	20	2.5413	AT4G34131.1, AT2G42010.1, AT2G26560.1, AT3G01280.1, AT3G14310.1, AT1G53240.1, AT5G54800.1, AT4G15210.1, AT1G61800.1, AT3G60240.4, AT5G59890.1, AT1G10760.1, AT5G42650.1, AT3G12500.1, AT1G08830.1, AT1G05010.1, AT5G57490.1, AT4G31750.1, AT3G60190.1, AT5G52450.1	1.1e-16	6.2e-15	Cluster_4
GO:0065008	Biological process	regulation of biological quality	20	2.5413	AT2G19760.1, AT2G17420.1, AT2G40300.1, AT5G48930.1, AT4G26690.1, AT1G12840.1, AT2G39700.1, AT4G35090.1, AT5G65980.1, AT4G31820.1, AT4G36760.1, AT5G42150.1, AT5G66680.1, AT4G38630.1, AT4G34490.1, AT4G04950.1, AT5G63980.1, AT3G13870.1, AT1G15690.1, AT5G54140.1	0.0001	0.00085	Cluster_4
GO:0016043	Biological process	cellular component organization	20	2.5413	AT1G18800.1, AT2G19760.1, AT1G78900.1, AT4G26690.1, AT1G62440.1, AT2G19770.1, AT5G54800.1, AT2G05170.1, AT2G41740.1, AT2G39700.1, AT4G29040.1, AT2G27600.1, AT4G34490.1, AT3G13870.1, AT5G16620.1, AT5G66680.1, AT4G38630.1, AT5G63980.1, AT5G56600.1, AT1G12840.1	0.039	0.26	Cluster_4
GO:0009651	Biological process	response to salt stress	19	2.41423	AT5G62530.1, AT5G43060.1, AT2G13560.1, AT1G53240.1, AT3G12390.1, AT1G44170.1, AT1G08830.1, AT3G48330.1, AT5G27600.1, AT1G11910.1, AT1G65930.1, AT1G59960.1, AT5G46180.1, AT4G38630.1, AT2G05710.1, AT5G63980.1, AT1G17880.1, AT1G14210.1, AT1G15690.1	9.5e-18	6.3e-16	Cluster_4
GO:0006629	Biological process	lipid metabolic process	19	2.41423	AT1G79750.1, AT5G59420.1, AT5G42650.1, AT3G23530.1, AT1G77590.1, AT1G74960.2, AT1G58440.1, AT1G20510.1, AT5G27600.1, AT1G06290.1, AT4G29010.1, AT1G76690.1, AT3G58750.1, AT1G29660.1, AT5G43280.1, AT5G23960.1, AT2G26560.1, AT5G62930.1, AT4G16820.1	0.0024	0.017	Cluster_4
GO:0022414	Biological process	reproductive process	19	2.41423	AT1G05190.1, AT2G02850.1, AT2G17420.1, AT2G40300.1, AT1G07890.3, AT2G22250.2, AT3G04120.1, AT5G09900.3, AT5G67360.1, AT1G61800.1, AT4G31820.1, AT5G49360.1, AT1G21750.1, AT5G37510.2, AT3G06350.1, AT4G29010.1, AT4G38630.1, AT5G63980.1, AT2G38280.1	0.04	0.27	Cluster_4
GO:0000003	Biological process	reproduction	19	2.41423	AT1G05190.1, AT2G02850.1, AT2G17420.1, AT2G40300.1, AT1G07890.3, AT2G22250.2, AT3G04120.1, AT5G09900.3, AT5G67360.1, AT1G61800.1, AT4G31820.1, AT5G49360.1, AT1G21750.1, AT5G37510.2, AT3G06350.1, AT4G29010.1, AT4G38630.1, AT5G63980.1, AT2G38280.1	0.046	0.3	Cluster_4
GO:0010033	Biological process	response to organic substance	18	2.28717	AT3G56860.3, AT3G47340.1, AT1G15520.1, AT1G76180.1, AT1G44170.1, AT4G29040.1, AT1G61800.1, AT3G48330.1, AT5G20990.1, AT2G28900.1, AT5G60360.3, AT5G42650.1, AT3G12500.1, AT4G38630.1, AT2G05710.1, AT5G63980.1, AT2G02990.1, AT3G04120.1	2.5e-09	4.2e-08	Cluster_4
GO:0010467	Biological process	gene expression	18	2.28717	AT1G05190.1, AT3G56860.3, AT1G09570.1, AT5G27770.1, AT3G13920.2, AT4G27270.1, AT4G16720.1, AT3G09630.1, AT4G34670.1, AT5G58420.1, AT3G55280.1, AT3G11400.2, AT1G13950.1, AT2G05830.1, AT5G28060.1, AT1G09690.1, AT5G63980.1, AT5G47700.1	0.0013	0.0098	Cluster_4
GO:0003006	Biological process	reproductive developmental process	18	2.28717	AT1G05190.1, AT2G02850.1, AT2G17420.1, AT2G40300.1, AT1G07890.3, AT2G22250.2, AT5G09900.3, AT5G67360.1, AT3G04120.1, AT4G31820.1, AT5G49360.1, AT1G21750.1, AT5G37510.2, AT3G06350.1, AT4G29010.1, AT4G38630.1, AT5G63980.1, AT2G38280.1	0.016	0.11	Cluster_4
GO:0048608	Biological process	reproductive structure development	18	2.28717	AT1G05190.1, AT2G02850.1, AT2G17420.1, AT2G40300.1, AT1G07890.3, AT2G22250.2, AT5G09900.3, AT5G67360.1, AT3G04120.1, AT4G31820.1, AT5G49360.1, AT1G21750.1, AT5G37510.2, AT3G06350.1, AT4G29010.1, AT4G38630.1, AT5G63980.1, AT2G38280.1	0.016	0.11	Cluster_4
GO:0010038	Biological process	response to metal ion	16	2.03304	AT3G48990.1, AT2G35840.1, AT2G40300.1, AT3G18190.1, AT1G53240.1, AT1G65930.1, AT3G08590.1, AT4G39230.1, AT3G20390.1, AT5G08680.1, AT1G08830.1, AT5G13420.1, AT5G42740.1, AT2G05710.1, AT3G09440.1, AT4G14880.1	9e-21	7.4e-19	Cluster_4
GO:0016053	Biological process	organic acid biosynthetic process	16	2.03304	AT4G01850.1, AT5G53850.2, AT4G38800.1, AT5G17920.1, AT3G61440.1, AT1G79750.1, AT1G77590.1, AT1G74960.2, AT1G20510.1, AT3G63250.1, AT2G45790.1, AT5G42650.1, AT1G76690.1, AT2G26560.1, AT4G14880.1, AT5G46180.1	3e-15	1.4e-13	Cluster_4
GO:0046394	Biological process	carboxylic acid biosynthetic process	16	2.03304	AT4G01850.1, AT5G53850.2, AT4G38800.1, AT5G17920.1, AT3G61440.1, AT1G79750.1, AT1G77590.1, AT1G74960.2, AT1G20510.1, AT3G63250.1, AT2G45790.1, AT5G42650.1, AT1G76690.1, AT2G26560.1, AT4G14880.1, AT5G46180.1	3e-15	1.4e-13	Cluster_4
GO:0006066	Biological process	alcohol metabolic process	16	2.03304	AT4G26690.1, AT5G13110.1, AT3G61610.1, AT4G26270.1, AT3G46440.1, AT5G40760.1, AT1G30620.1, AT5G56350.1, AT4G37870.1, AT2G45790.1, AT3G04120.1, AT5G42740.1, AT3G26720.1, AT5G47810.1, AT1G58440.1, AT2G22480.1	3e-15	1.4e-13	Cluster_4
GO:0032787	Biological process	monocarboxylic acid metabolic process	16	2.03304	AT1G79750.1, AT3G13930.1, AT5G42650.1, AT1G77590.1, AT1G74960.2, AT3G04120.1, AT3G58750.1, AT1G20510.1, AT5G27600.1, AT4G37870.1, AT4G29010.1, AT1G76690.1, AT5G42740.1, AT5G43280.1, AT2G26560.1, AT1G06290.1	5.1e-13	1.8e-11	Cluster_4
GO:0009409	Biological process	response to cold	15	1.90597	AT1G23740.1, AT4G20260.4, AT1G53240.1, AT1G76180.1, AT5G38470.1, AT4G13850.1, AT4G35090.1, AT3G55280.1, AT1G63940.2, AT2G28900.1, AT5G67590.1, AT5G51820.1, AT3G47520.1, AT5G63980.1, AT1G10760.1	7.5e-18	5.2e-16	Cluster_4
GO:0034637	Biological process	cellular carbohydrate biosynthetic process	15	1.90597	AT2G35840.1, AT2G14750.1, AT3G04120.1, AT2G45790.1, AT1G06410.1, AT5G42740.1, AT4G37870.1, AT5G51820.1, AT5G66680.1, AT4G02280.1, AT1G73370.1, AT1G30620.1, AT3G43190.1, AT4G17770.1, AT5G03650.1	2.4e-17	1.6e-15	Cluster_4
GO:0006091	Biological process	generation of precursor metabolites and energy	15	1.90597	AT4G26270.1, AT5G08530.1, AT5G66760.1, AT1G60950.1, AT3G04120.1, AT4G26910.1, AT5G42740.1, AT5G56350.1, AT5G17770.1, AT2G44350.2, AT3G58750.1, AT2G33040.1, AT3G14940.1, AT2G22480.1, AT5G47810.1	6.1e-15	2.8e-13	Cluster_4
GO:0009605	Biological process	response to external stimulus	15	1.90597	AT1G20510.1, AT3G47340.1, AT1G09570.1, AT1G76690.1, AT3G03250.1, AT2G37040.1, AT1G23010.1, AT4G35090.1, AT2G28900.1, AT5G14780.1, AT5G51820.1, AT5G42650.1, AT3G12500.1, AT2G27190.1, AT2G02990.1	2.1e-13	7.9e-12	Cluster_4
GO:0016051	Biological process	carbohydrate biosynthetic process	15	1.90597	AT2G35840.1, AT2G14750.1, AT3G04120.1, AT2G45790.1, AT1G06410.1, AT5G42740.1, AT4G37870.1, AT5G51820.1, AT5G66680.1, AT4G02280.1, AT1G73370.1, AT1G30620.1, AT3G43190.1, AT4G17770.1, AT5G03650.1	1.8e-12	5.5e-11	Cluster_4
GO:0009308	Biological process	amine metabolic process	15	1.90597	AT4G01850.1, AT5G53850.2, AT4G38800.1, AT5G17920.1, AT3G61440.1, AT1G05010.1, AT3G47340.1, AT1G79440.1, AT3G63250.1, AT5G62530.1, AT1G62810.1, AT1G64660.1, AT1G12050.1, AT4G14880.1, AT5G46180.1	2.9e-12	8.8e-11	Cluster_4
GO:0006952	Biological process	defense response	15	1.90597	AT5G06860.1, AT2G42010.1, AT1G53240.1, AT3G12500.1, AT5G49040.1, AT3G60190.1, AT2G37040.1, AT2G26560.1, AT5G59890.1, AT5G42650.1, AT4G23570.3, AT1G08830.1, AT1G33590.1, AT1G59218.1, AT4G31750.1	3.9e-12	1.1e-10	Cluster_4
GO:0033554	Biological process	cellular response to stress	15	1.90597	AT3G54960.1, AT5G38470.1, AT2G29570.1, AT2G26560.1, AT2G36060.2, AT3G03250.1, AT1G23010.1, AT4G35090.1, AT1G08830.1, AT2G27190.1, AT3G47340.1, AT4G38630.1, AT1G21750.1, AT2G02990.1, AT3G52880.2	1.5e-11	4e-10	Cluster_4
GO:0046907	Biological process	intracellular transport	15	1.90597	AT4G35410.2, AT4G11790.1, AT5G16620.1, AT2G20760.1, AT1G27970.2, AT3G13870.1, AT2G38410.1, AT3G06720.1, AT2G28900.1, AT4G28390.1, AT2G44100.1, AT5G55190.1, AT5G16880.1, AT2G42810.2, AT5G11710.1	1.5e-11	4e-10	Cluster_4
GO:0006979	Biological process	response to oxidative stress	15	1.90597	AT3G06050.1, AT2G40300.1, AT4G33420.1, AT2G37040.1, AT3G04120.1, AT3G55280.1, AT1G07890.3, AT5G37510.2, AT1G56340.1, AT5G37980.1, AT5G60640.1, AT1G08830.1, AT2G05710.1, AT4G35090.1, AT3G52880.2	2.2e-11	5.7e-10	Cluster_4
GO:0051649	Biological process	establishment of localization in cell	15	1.90597	AT4G35410.2, AT4G11790.1, AT5G16620.1, AT2G20760.1, AT1G27970.2, AT3G13870.1, AT2G38410.1, AT3G06720.1, AT2G28900.1, AT4G28390.1, AT2G44100.1, AT5G55190.1, AT5G16880.1, AT2G42810.2, AT5G11710.1	0.001	0.0076	Cluster_4
GO:0051641	Biological process	cellular localization	15	1.90597	AT4G35410.2, AT4G11790.1, AT5G16620.1, AT2G20760.1, AT1G27970.2, AT3G13870.1, AT2G38410.1, AT3G06720.1, AT2G28900.1, AT4G28390.1, AT2G44100.1, AT5G55190.1, AT5G16880.1, AT2G42810.2, AT5G11710.1	0.0024	0.017	Cluster_4
GO:0005996	Biological process	monosaccharide metabolic process	14	1.77891	AT5G13110.1, AT3G61610.1, AT4G26270.1, AT3G46440.1, AT5G40760.1, AT5G56350.1, AT4G37870.1, AT2G45790.1, AT3G04120.1, AT5G42740.1, AT3G26720.1, AT5G47810.1, AT1G30620.1, AT2G22480.1	3.2e-14	1.3e-12	Cluster_4
GO:0044106	Biological process	cellular amine metabolic process	14	1.77891	AT4G01850.1, AT5G53850.2, AT4G38800.1, AT5G17920.1, AT3G61440.1, AT1G05010.1, AT3G47340.1, AT1G79440.1, AT4G14880.1, AT5G62530.1, AT1G64660.1, AT1G12050.1, AT3G63250.1, AT5G46180.1	1.7e-12	5.5e-11	Cluster_4
GO:0006520	Biological process	cellular amino acid metabolic process	14	1.77891	AT4G01850.1, AT5G53850.2, AT4G38800.1, AT5G17920.1, AT3G61440.1, AT1G05010.1, AT3G47340.1, AT1G79440.1, AT4G14880.1, AT5G62530.1, AT1G64660.1, AT1G12050.1, AT3G63250.1, AT5G46180.1	1.7e-12	5.5e-11	Cluster_4
GO:0006412	Biological process	translation	14	1.77891	AT1G05190.1, AT4G34670.1, AT5G27770.1, AT3G13920.2, AT4G16720.1, AT3G09630.1, AT5G58420.1, AT3G55280.1, AT3G11400.2, AT1G13950.1, AT2G05830.1, AT5G28060.1, AT1G09690.1, AT5G47700.1	3.2e-08	4.8e-07	Cluster_4
GO:0019748	Biological process	secondary metabolic process	14	1.77891	AT5G13110.1, AT3G50740.1, AT5G07990.1, AT2G14750.1, AT2G37040.1, AT1G12840.1, AT5G40760.1, AT1G20510.1, AT5G49040.1, AT5G23960.1, AT3G51450.1, AT5G48930.1, AT2G02990.1, AT5G54160.1	0.0014	0.011	Cluster_4
GO:0048869	Biological process	cellular developmental process	13	1.65184	AT1G18800.1, AT2G19760.1, AT4G26690.1, AT1G62440.1, AT1G12840.1, AT1G20850.1, AT2G39700.1, AT4G29040.1, AT4G34490.1, AT5G66680.1, AT4G38630.1, AT5G63980.1, AT3G13870.1	1.1e-10	2.5e-09	Cluster_4
GO:0044271	Biological process	cellular nitrogen compound biosynthetic process	13	1.65184	AT4G01850.1, AT5G53850.2, AT4G38800.1, AT5G17920.1, AT3G61440.1, AT4G01690.1, AT5G20990.1, AT4G14880.1, AT5G23300.1, AT3G51450.1, AT1G69740.1, AT3G63250.1, AT5G46180.1	2.3e-10	5e-09	Cluster_4
GO:0006725	Biological process	cellular aromatic compound metabolic process	13	1.65184	AT4G01850.1, AT3G50740.1, AT5G07990.1, AT1G12840.1, AT2G37040.1, AT1G20510.1, AT5G20990.1, AT5G49040.1, AT5G23300.1, AT1G12050.1, AT5G48930.1, AT2G02990.1, AT5G54160.1	5.2e-10	1.1e-08	Cluster_4
GO:0048316	Biological process	seed development	13	1.65184	AT1G05190.1, AT2G17420.1, AT2G22250.2, AT5G67360.1, AT3G04120.1, AT5G09900.3, AT5G49360.1, AT1G07890.3, AT5G37510.2, AT4G31820.1, AT3G06350.1, AT1G21750.1, AT2G38280.1	7.8e-10	1.4e-08	Cluster_4
GO:0033036	Biological process	macromolecule localization	13	1.65184	AT4G35410.2, AT5G16620.1, AT2G20760.1, AT1G27970.2, AT2G38410.1, AT3G06720.1, AT2G28900.1, AT4G31820.1, AT2G44100.1, AT5G55190.1, AT5G16880.1, AT5G65020.1, AT5G11710.1	1.5e-09	2.5e-08	Cluster_4
GO:0010154	Biological process	fruit development	13	1.65184	AT1G05190.1, AT2G17420.1, AT2G22250.2, AT5G67360.1, AT3G04120.1, AT5G09900.3, AT5G49360.1, AT1G07890.3, AT5G37510.2, AT4G31820.1, AT3G06350.1, AT1G21750.1, AT2G38280.1	2.1e-09	3.6e-08	Cluster_4
GO:0009416	Biological process	response to light stimulus	13	1.65184	AT5G18170.1, AT1G09570.1, AT4G35090.1, AT5G07990.1, AT1G73990.1, AT1G79440.1, AT5G63890.2, AT3G55280.1, AT4G31820.1, AT1G60950.1, AT2G42810.2, AT3G47340.1, AT5G63980.1	0.009	0.062	Cluster_4
GO:0009314	Biological process	response to radiation	13	1.65184	AT5G18170.1, AT1G09570.1, AT4G35090.1, AT5G07990.1, AT1G73990.1, AT1G79440.1, AT5G63890.2, AT3G55280.1, AT4G31820.1, AT1G60950.1, AT2G42810.2, AT3G47340.1, AT5G63980.1	0.011	0.079	Cluster_4
GO:0044255	Biological process	cellular lipid metabolic process	13	1.65184	AT1G79750.1, AT5G42650.1, AT1G77590.1, AT1G74960.2, AT1G20510.1, AT5G27600.1, AT4G29010.1, AT1G76690.1, AT3G58750.1, AT5G23960.1, AT5G43280.1, AT2G26560.1, AT1G06290.1	0.015	0.1	Cluster_4
GO:0019318	Biological process	hexose metabolic process	12	1.52478	AT5G13110.1, AT3G61610.1, AT4G26270.1, AT3G04120.1, AT5G40760.1, AT5G56350.1, AT4G37870.1, AT2G45790.1, AT5G42740.1, AT3G26720.1, AT5G47810.1, AT2G22480.1	8e-13	2.7e-11	Cluster_4
GO:0006790	Biological process	sulfur metabolic process	12	1.52478	AT4G01850.1, AT5G53850.2, AT4G38800.1, AT3G61440.1, AT5G17920.1, AT2G14750.1, AT3G63250.1, AT4G39120.1, AT1G64660.1, AT1G05010.1, AT5G63980.1, AT4G14880.1	3.1e-12	9.1e-11	Cluster_4
GO:0006631	Biological process	fatty acid metabolic process	12	1.52478	AT1G79750.1, AT5G42650.1, AT1G77590.1, AT1G74960.2, AT1G20510.1, AT5G27600.1, AT4G29010.1, AT1G76690.1, AT3G58750.1, AT5G43280.1, AT2G26560.1, AT1G06290.1	3.9e-12	1.1e-10	Cluster_4
GO:0055086	Biological process	nucleobase, nucleoside and nucleotide metabolic process	12	1.52478	AT4G01850.1, AT1G10700.1, AT2G19570.1, AT5G40760.1, AT3G55010.1, AT5G13110.1, AT5G23300.1, AT2G36310.1, AT2G33040.1, AT4G29680.1, AT2G38280.1, AT4G38800.1	1.6e-11	4.2e-10	Cluster_4
GO:0006575	Biological process	cellular amino acid derivative metabolic process	12	1.52478	AT4G01850.1, AT3G50740.1, AT5G07990.1, AT1G12840.1, AT2G37040.1, AT1G79440.1, AT1G20510.1, AT5G49040.1, AT1G05010.1, AT5G48930.1, AT2G02990.1, AT5G54160.1	6.1e-10	1.2e-08	Cluster_4
GO:0008104	Biological process	protein localization	12	1.52478	AT4G35410.2, AT5G16620.1, AT2G20760.1, AT1G27970.2, AT2G38410.1, AT3G06720.1, AT2G28900.1, AT4G31820.1, AT2G44100.1, AT5G55190.1, AT5G16880.1, AT5G11710.1	1.7e-09	2.9e-08	Cluster_4
GO:0009653	Biological process	anatomical structure morphogenesis	12	1.52478	AT1G18800.1, AT2G19760.1, AT4G26690.1, AT1G62440.1, AT1G12840.1, AT2G39700.1, AT4G29040.1, AT4G34490.1, AT5G66680.1, AT4G38630.1, AT5G63980.1, AT3G13870.1	1.4e-08	2.1e-07	Cluster_4
GO:0046483	Biological process	heterocycle metabolic process	12	1.52478	AT1G69740.1, AT2G19570.1, AT4G01690.1, AT5G20990.1, AT3G55010.1, AT5G62530.1, AT5G23300.1, AT2G36310.1, AT2G33040.1, AT2G38280.1, AT5G46180.1, AT5G54160.1	2e-08	2.9e-07	Cluster_4
GO:0006996	Biological process	organelle organization	12	1.52478	AT1G18800.1, AT2G19760.1, AT1G78900.1, AT2G19770.1, AT5G54800.1, AT2G05170.1, AT2G41740.1, AT2G27600.1, AT4G34490.1, AT5G16620.1, AT5G56600.1, AT3G13870.1	0.044	0.29	Cluster_4
GO:0016052	Biological process	carbohydrate catabolic process	11	1.39771	AT5G13110.1, AT3G04120.1, AT4G15210.1, AT5G40760.1, AT5G56350.1, AT4G26270.1, AT1G10760.1, AT5G42740.1, AT4G09020.1, AT5G47810.1, AT2G22480.1	1.5e-12	4.9e-11	Cluster_4
GO:0006886	Biological process	intracellular protein transport	11	1.39771	AT4G35410.2, AT5G16620.1, AT2G20760.1, AT1G27970.2, AT2G38410.1, AT3G06720.1, AT2G28900.1, AT2G44100.1, AT5G55190.1, AT5G16880.1, AT5G11710.1	5.4e-10	1.1e-08	Cluster_4
GO:0034613	Biological process	cellular protein localization	11	1.39771	AT4G35410.2, AT5G16620.1, AT2G20760.1, AT1G27970.2, AT2G38410.1, AT3G06720.1, AT2G28900.1, AT2G44100.1, AT5G55190.1, AT5G16880.1, AT5G11710.1	5.4e-10	1.1e-08	Cluster_4
GO:0070727	Biological process	cellular macromolecule localization	11	1.39771	AT4G35410.2, AT5G16620.1, AT2G20760.1, AT1G27970.2, AT2G38410.1, AT3G06720.1, AT2G28900.1, AT2G44100.1, AT5G55190.1, AT5G16880.1, AT5G11710.1	6.5e-10	1.2e-08	Cluster_4
GO:0040007	Biological process	growth	11	1.39771	AT2G19760.1, AT2G17420.1, AT4G26690.1, AT1G12840.1, AT2G39700.1, AT4G29040.1, AT4G34490.1, AT5G66680.1, AT4G38630.1, AT5G63980.1, AT3G13870.1	6.5e-10	1.2e-08	Cluster_4
GO:0045184	Biological process	establishment of protein localization	11	1.39771	AT4G35410.2, AT5G16620.1, AT2G20760.1, AT1G27970.2, AT2G38410.1, AT3G06720.1, AT2G28900.1, AT2G44100.1, AT5G55190.1, AT5G16880.1, AT5G11710.1	7.1e-09	1.1e-07	Cluster_4
GO:0015031	Biological process	protein transport	11	1.39771	AT4G35410.2, AT5G16620.1, AT2G20760.1, AT1G27970.2, AT2G38410.1, AT3G06720.1, AT2G28900.1, AT2G44100.1, AT5G55190.1, AT5G16880.1, AT5G11710.1	7.1e-09	1.1e-07	Cluster_4
GO:0044275	Biological process	cellular carbohydrate catabolic process	11	1.39771	AT5G13110.1, AT3G04120.1, AT4G15210.1, AT5G40760.1, AT5G56350.1, AT4G26270.1, AT1G10760.1, AT5G42740.1, AT4G09020.1, AT5G47810.1, AT2G22480.1	2.8e-07	3.6e-06	Cluster_4
GO:0006464	Biological process	protein modification process	11	1.39771	AT1G63500.1, AT1G76400.1, AT2G17200.1, AT3G04690.1, AT1G56140.1, AT3G48330.1, AT3G57830.1, AT5G66680.1, AT1G16270.1, AT5G48380.1, AT4G31750.1	9e-06	9.2e-05	Cluster_4
GO:0043412	Biological process	macromolecule modification	11	1.39771	AT1G63500.1, AT1G76400.1, AT2G17200.1, AT3G04690.1, AT1G56140.1, AT3G48330.1, AT3G57830.1, AT5G66680.1, AT1G16270.1, AT5G48380.1, AT4G31750.1	6.2e-05	0.00056	Cluster_4
GO:0048589	Biological process	developmental growth	10	1.27065	AT2G19760.1, AT4G26690.1, AT1G12840.1, AT2G39700.1, AT4G29040.1, AT4G34490.1, AT5G66680.1, AT4G38630.1, AT5G63980.1, AT3G13870.1	6.2e-12	1.7e-10	Cluster_4
GO:0009414	Biological process	response to water deprivation	10	1.27065	AT3G46970.1, AT3G29320.1, AT1G44170.1, AT1G58440.1, AT2G37170.1, AT4G00430.1, AT1G76180.1, AT5G63980.1, AT3G53420.1, AT1G15690.1	1.8e-10	4.1e-09	Cluster_4
GO:0008361	Biological process	regulation of cell size	10	1.27065	AT2G19760.1, AT2G17420.1, AT4G26690.1, AT1G12840.1, AT2G39700.1, AT4G34490.1, AT5G66680.1, AT4G38630.1, AT5G63980.1, AT3G13870.1	3.8e-10	8.1e-09	Cluster_4
GO:0016049	Biological process	cell growth	10	1.27065	AT2G19760.1, AT2G17420.1, AT4G26690.1, AT1G12840.1, AT2G39700.1, AT4G34490.1, AT5G66680.1, AT4G38630.1, AT5G63980.1, AT3G13870.1	3.8e-10	8.1e-09	Cluster_4
GO:0032535	Biological process	regulation of cellular component size	10	1.27065	AT2G19760.1, AT2G17420.1, AT4G26690.1, AT1G12840.1, AT2G39700.1, AT4G34490.1, AT5G66680.1, AT4G38630.1, AT5G63980.1, AT3G13870.1	4.7e-10	9.8e-09	Cluster_4
GO:0090066	Biological process	regulation of anatomical structure size	10	1.27065	AT2G19760.1, AT2G17420.1, AT4G26690.1, AT1G12840.1, AT2G39700.1, AT4G34490.1, AT5G66680.1, AT4G38630.1, AT5G63980.1, AT3G13870.1	4.7e-10	9.8e-09	Cluster_4
GO:0009415	Biological process	response to water	10	1.27065	AT3G46970.1, AT3G29320.1, AT1G44170.1, AT1G58440.1, AT2G37170.1, AT4G00430.1, AT1G76180.1, AT5G63980.1, AT3G53420.1, AT1G15690.1	6e-10	1.2e-08	Cluster_4
GO:0051186	Biological process	cofactor metabolic process	10	1.27065	AT3G14940.1, AT5G13110.1, AT3G20970.1, AT5G40760.1, AT5G20990.1, AT4G26910.1, AT2G44350.2, AT3G58750.1, AT1G69740.1, AT4G01690.1	1e-08	1.6e-07	Cluster_4
GO:0008610	Biological process	lipid biosynthetic process	10	1.27065	AT1G79750.1, AT3G23530.1, AT1G77590.1, AT1G74960.2, AT1G58440.1, AT1G20510.1, AT1G76690.1, AT5G42650.1, AT2G26560.1, AT5G23960.1	1.5e-06	1.7e-05	Cluster_4
GO:0032989	Biological process	cellular component morphogenesis	9	1.14358	AT2G19760.1, AT4G26690.1, AT1G62440.1, AT1G12840.1, AT2G39700.1, AT4G34490.1, AT5G66680.1, AT5G63980.1, AT3G13870.1	1.2e-09	2.1e-08	Cluster_4
GO:0009698	Biological process	phenylpropanoid metabolic process	9	1.14358	AT3G50740.1, AT5G07990.1, AT1G12840.1, AT2G37040.1, AT1G20510.1, AT5G49040.1, AT5G48930.1, AT2G02990.1, AT5G54160.1	9.6e-09	1.5e-07	Cluster_4
GO:0000096	Biological process	sulfur amino acid metabolic process	9	1.14358	AT4G01850.1, AT5G53850.2, AT4G38800.1, AT3G61440.1, AT5G17920.1, AT3G63250.1, AT1G64660.1, AT1G05010.1, AT4G14880.1	1.7e-07	2.2e-06	Cluster_4
GO:0042398	Biological process	cellular amino acid derivative biosynthetic process	9	1.14358	AT4G01850.1, AT5G07990.1, AT1G12840.1, AT2G37040.1, AT5G49040.1, AT1G05010.1, AT5G48930.1, AT2G02990.1, AT5G54160.1	2.2e-07	2.9e-06	Cluster_4
GO:0070887	Biological process	cellular response to chemical stimulus	9	1.14358	AT3G56860.3, AT4G01070.1, AT3G12500.1, AT5G20990.1, AT4G35090.1, AT1G08830.1, AT5G63980.1, AT2G02990.1, AT3G52880.2	4.8e-07	6e-06	Cluster_4
GO:0006006	Biological process	glucose metabolic process	9	1.14358	AT5G13110.1, AT4G26270.1, AT3G04120.1, AT5G40760.1, AT5G56350.1, AT4G37870.1, AT5G42740.1, AT5G47810.1, AT2G22480.1	9.8e-07	1.1e-05	Cluster_4
GO:0016054	Biological process	organic acid catabolic process	9	1.14358	AT4G29010.1, AT3G47340.1, AT1G06290.1, AT1G79440.1, AT5G62530.1, AT3G58750.1, AT1G64660.1, AT5G43280.1, AT5G46180.1	1.7e-06	1.8e-05	Cluster_4
GO:0046395	Biological process	carboxylic acid catabolic process	9	1.14358	AT4G29010.1, AT3G47340.1, AT1G06290.1, AT1G79440.1, AT5G62530.1, AT3G58750.1, AT1G64660.1, AT5G43280.1, AT5G46180.1	1.7e-06	1.8e-05	Cluster_4
GO:0009790	Biological process	embryonic development	9	1.14358	AT1G05190.1, AT2G22250.2, AT4G31820.1, AT5G09900.3, AT1G07890.3, AT5G37510.2, AT3G06350.1, AT1G21750.1, AT2G38280.1	2e-06	2.2e-05	Cluster_4
GO:0000902	Biological process	cell morphogenesis	9	1.14358	AT2G19760.1, AT4G26690.1, AT1G62440.1, AT1G12840.1, AT2G39700.1, AT4G34490.1, AT5G66680.1, AT5G63980.1, AT3G13870.1	0.0031	0.022	Cluster_4
GO:0008652	Biological process	cellular amino acid biosynthetic process	8	1.01652	AT4G01850.1, AT5G53850.2, AT4G38800.1, AT3G61440.1, AT5G17920.1, AT4G14880.1, AT3G63250.1, AT5G46180.1	1.4e-08	2.1e-07	Cluster_4
GO:0009611	Biological process	response to wounding	8	1.01652	AT3G12500.1, AT2G37040.1, AT1G20510.1, AT2G28900.1, AT5G14780.1, AT5G42650.1, AT1G76690.1, AT2G02990.1	3.5e-08	5e-07	Cluster_4
GO:0006753	Biological process	nucleoside phosphate metabolic process	8	1.01652	AT1G10700.1, AT5G40760.1, AT3G55010.1, AT5G13110.1, AT5G23300.1, AT2G33040.1, AT4G29680.1, AT2G38280.1	3.5e-08	5e-07	Cluster_4
GO:0009117	Biological process	nucleotide metabolic process	8	1.01652	AT1G10700.1, AT5G40760.1, AT3G55010.1, AT5G13110.1, AT5G23300.1, AT2G33040.1, AT4G29680.1, AT2G38280.1	3.5e-08	5e-07	Cluster_4
GO:0055114	Biological process	oxidation reduction	8	1.01652	AT5G13440.1, AT5G08530.1, AT5G24760.1, AT5G66760.1, AT1G60950.1, AT4G00570.1, AT5G17770.1, AT3G56460.1	5.4e-08	7.6e-07	Cluster_4
GO:0009309	Biological process	amine biosynthetic process	8	1.01652	AT4G01850.1, AT5G53850.2, AT4G38800.1, AT3G61440.1, AT5G17920.1, AT4G14880.1, AT3G63250.1, AT5G46180.1	6.6e-08	9.3e-07	Cluster_4
GO:0019438	Biological process	aromatic compound biosynthetic process	8	1.01652	AT5G07990.1, AT1G12840.1, AT2G37040.1, AT5G20990.1, AT2G02990.1, AT5G48930.1, AT5G49040.1, AT5G54160.1	1.1e-06	1.3e-05	Cluster_4
GO:0006007	Biological process	glucose catabolic process	8	1.01652	AT4G26270.1, AT3G04120.1, AT5G40760.1, AT5G56350.1, AT5G13110.1, AT5G42740.1, AT5G47810.1, AT2G22480.1	6.4e-06	6.7e-05	Cluster_4
GO:0019320	Biological process	hexose catabolic process	8	1.01652	AT4G26270.1, AT3G04120.1, AT5G40760.1, AT5G56350.1, AT5G13110.1, AT5G42740.1, AT5G47810.1, AT2G22480.1	7.1e-06	7.3e-05	Cluster_4
GO:0046365	Biological process	monosaccharide catabolic process	8	1.01652	AT4G26270.1, AT3G04120.1, AT5G40760.1, AT5G56350.1, AT5G13110.1, AT5G42740.1, AT5G47810.1, AT2G22480.1	7.1e-06	7.3e-05	Cluster_4
GO:0046164	Biological process	alcohol catabolic process	8	1.01652	AT4G26270.1, AT3G04120.1, AT5G40760.1, AT5G56350.1, AT5G13110.1, AT5G42740.1, AT5G47810.1, AT2G22480.1	1.1e-05	0.00011	Cluster_4
GO:0009793	Biological process	embryonic development ending in seed dormancy	8	1.01652	AT1G05190.1, AT2G22250.2, AT4G31820.1, AT5G09900.3, AT1G07890.3, AT5G37510.2, AT3G06350.1, AT2G38280.1	1.3e-05	0.00013	Cluster_4
GO:0044272	Biological process	sulfur compound biosynthetic process	8	1.01652	AT4G01850.1, AT5G53850.2, AT4G38800.1, AT3G61440.1, AT5G17920.1, AT2G14750.1, AT3G63250.1, AT4G14880.1	2.8e-05	0.00027	Cluster_4
GO:0016137	Biological process	glycoside metabolic process	8	1.01652	AT2G35840.1, AT2G14750.1, AT3G03250.1, AT1G06410.1, AT4G02280.1, AT1G73370.1, AT3G43190.1, AT4G17770.1	3.3e-05	0.00031	Cluster_4
GO:0060560	Biological process	developmental growth involved in morphogenesis	8	1.01652	AT2G19760.1, AT4G26690.1, AT1G12840.1, AT2G39700.1, AT4G34490.1, AT5G66680.1, AT5G63980.1, AT3G13870.1	0.002	0.015	Cluster_4
GO:0009826	Biological process	unidimensional cell growth	8	1.01652	AT2G19760.1, AT4G26690.1, AT1G12840.1, AT2G39700.1, AT4G34490.1, AT5G66680.1, AT5G63980.1, AT3G13870.1	0.002	0.015	Cluster_4
GO:0080090	Biological process	regulation of primary metabolic process	8	1.01652	AT3G56860.3, AT1G09570.1, AT2G14750.1, AT4G27270.1, AT2G29570.1, AT5G56260.1, AT5G63980.1, AT5G48930.1	0.028	0.19	Cluster_4
GO:0031323	Biological process	regulation of cellular metabolic process	8	1.01652	AT3G56860.3, AT1G09570.1, AT2G14750.1, AT4G27270.1, AT2G29570.1, AT5G56260.1, AT5G63980.1, AT5G48930.1	0.035	0.23	Cluster_4
GO:0016138	Biological process	glycoside biosynthetic process	7	0.889454	AT2G35840.1, AT2G14750.1, AT1G06410.1, AT4G02280.1, AT1G73370.1, AT3G43190.1, AT4G17770.1	4.5e-10	9.6e-09	Cluster_4
GO:0005984	Biological process	disaccharide metabolic process	7	0.889454	AT2G35840.1, AT3G03250.1, AT1G06410.1, AT4G02280.1, AT1G73370.1, AT3G43190.1, AT4G17770.1	8e-10	1.4e-08	Cluster_4
GO:0006633	Biological process	fatty acid biosynthetic process	7	0.889454	AT1G79750.1, AT1G74960.2, AT1G20510.1, AT1G76690.1, AT5G42650.1, AT1G77590.1, AT2G26560.1	5.2e-09	8.5e-08	Cluster_4
GO:0005976	Biological process	polysaccharide metabolic process	7	0.889454	AT4G26690.1, AT4G15210.1, AT1G10760.1, AT5G66680.1, AT4G09020.1, AT5G03650.1, AT5G51820.1	7.2e-08	9.9e-07	Cluster_4
GO:0006732	Biological process	coenzyme metabolic process	7	0.889454	AT5G13110.1, AT5G40760.1, AT5G20990.1, AT4G26910.1, AT2G44350.2, AT3G58750.1, AT3G14940.1	1.9e-07	2.6e-06	Cluster_4
GO:0000097	Biological process	sulfur amino acid biosynthetic process	7	0.889454	AT4G01850.1, AT5G53850.2, AT4G38800.1, AT3G61440.1, AT5G17920.1, AT3G63250.1, AT4G14880.1	2.4e-07	3.2e-06	Cluster_4
GO:0009617	Biological process	response to bacterium	7	0.889454	AT2G42010.1, AT3G01280.1, AT5G57490.1, AT1G53240.1, AT5G59890.1, AT1G08830.1, AT4G31750.1	4.6e-07	5.7e-06	Cluster_4
GO:0009699	Biological process	phenylpropanoid biosynthetic process	7	0.889454	AT5G07990.1, AT1G12840.1, AT2G37040.1, AT2G02990.1, AT5G48930.1, AT5G49040.1, AT5G54160.1	9.8e-07	1.1e-05	Cluster_4
GO:0043687	Biological process	post-translational protein modification	7	0.889454	AT1G63500.1, AT3G04690.1, AT3G57830.1, AT1G56140.1, AT1G16270.1, AT5G48380.1, AT4G31750.1	1.6e-06	1.8e-05	Cluster_4
GO:0030154	Biological process	cell differentiation	7	0.889454	AT1G18800.1, AT4G26690.1, AT1G62440.1, AT3G13870.1, AT1G20850.1, AT4G29040.1, AT4G38630.1	4.7e-06	5e-05	Cluster_4
GO:0009311	Biological process	oligosaccharide metabolic process	7	0.889454	AT2G35840.1, AT3G03250.1, AT1G06410.1, AT4G02280.1, AT1G73370.1, AT3G43190.1, AT4G17770.1	5.4e-06	5.7e-05	Cluster_4
GO:0048229	Biological process	gametophyte development	7	0.889454	AT1G78900.1, AT3G05530.1, AT5G54800.1, AT5G63890.2, AT1G63180.1, AT4G38630.1, AT4G34200.1	1.4e-05	0.00014	Cluster_4
GO:0016192	Biological process	vesicle-mediated transport	7	0.889454	AT4G35410.2, AT3G60190.1, AT3G13870.1, AT2G38410.1, AT2G20760.1, AT2G27600.1, AT5G16880.1	7.6e-05	0.00066	Cluster_4
GO:0044085	Biological process	cellular component biogenesis	7	0.889454	AT1G18800.1, AT3G13870.1, AT3G55280.1, AT4G29040.1, AT5G28060.1, AT4G38630.1, AT1G30620.1	0.00012	0.001	Cluster_4
GO:0044042	Biological process	glucan metabolic process	7	0.889454	AT4G26690.1, AT4G15210.1, AT1G10760.1, AT5G66680.1, AT4G09020.1, AT5G03650.1, AT5G51820.1	0.00017	0.0014	Cluster_4
GO:0009312	Biological process	oligosaccharide biosynthetic process	6	0.762389	AT2G35840.1, AT1G06410.1, AT4G02280.1, AT1G73370.1, AT3G43190.1, AT4G17770.1	5e-09	8.3e-08	Cluster_4
GO:0009408	Biological process	response to heat	6	0.762389	AT4G29040.1, AT3G04120.1, AT1G79440.1, AT1G07890.3, AT4G38630.1, AT3G09440.1	6.4e-07	7.7e-06	Cluster_4
GO:0044264	Biological process	cellular polysaccharide metabolic process	6	0.762389	AT5G51820.1, AT4G15210.1, AT5G03650.1, AT5G66680.1, AT4G09020.1, AT1G10760.1	8.3e-07	9.8e-06	Cluster_4
GO:0042592	Biological process	homeostatic process	6	0.762389	AT2G17420.1, AT2G40300.1, AT4G35090.1, AT5G42150.1, AT4G04950.1, AT5G48930.1	1.4e-06	1.5e-05	Cluster_4
GO:0007010	Biological process	cytoskeleton organization	6	0.762389	AT2G19760.1, AT2G19770.1, AT2G41740.1, AT4G34490.1, AT5G56600.1, AT3G13870.1	1.3e-05	0.00013	Cluster_4
GO:0009555	Biological process	pollen development	6	0.762389	AT1G78900.1, AT3G05530.1, AT5G54800.1, AT5G63890.2, AT1G63180.1, AT4G38630.1	1.8e-05	0.00017	Cluster_4
GO:0022622	Biological process	root system development	6	0.762389	AT1G18800.1, AT4G26690.1, AT3G13870.1, AT4G29040.1, AT3G18130.1, AT4G38630.1	2.3e-05	0.00022	Cluster_4
GO:0048364	Biological process	root development	6	0.762389	AT1G18800.1, AT4G26690.1, AT3G13870.1, AT4G29040.1, AT3G18130.1, AT4G38630.1	2.3e-05	0.00022	Cluster_4
GO:0006555	Biological process	methionine metabolic process	6	0.762389	AT5G53850.2, AT4G38800.1, AT5G17920.1, AT1G64660.1, AT1G05010.1, AT3G63250.1	3.5e-05	0.00032	Cluster_4
GO:0022621	Biological process	shoot system development	6	0.762389	AT4G26690.1, AT2G40300.1, AT3G18130.1, AT4G29040.1, AT4G31820.1, AT4G38630.1	6.3e-05	0.00056	Cluster_4
GO:0048367	Biological process	shoot development	6	0.762389	AT4G26690.1, AT2G40300.1, AT3G18130.1, AT4G29040.1, AT4G31820.1, AT4G38630.1	6.3e-05	0.00056	Cluster_4
GO:0006096	Biological process	glycolysis	6	0.762389	AT4G26270.1, AT3G04120.1, AT5G56350.1, AT5G42740.1, AT5G47810.1, AT2G22480.1	7e-05	0.00062	Cluster_4
GO:0000302	Biological process	response to reactive oxygen species	6	0.762389	AT2G40300.1, AT3G04120.1, AT4G35090.1, AT1G07890.3, AT1G08830.1, AT3G52880.2	0.00012	0.00099	Cluster_4
GO:0009888	Biological process	tissue development	6	0.762389	AT4G26690.1, AT3G13870.1, AT1G23010.1, AT4G29040.1, AT1G13950.1, AT4G38630.1	0.00016	0.0013	Cluster_4
GO:0009267	Biological process	cellular response to starvation	6	0.762389	AT3G47340.1, AT3G03250.1, AT1G23010.1, AT4G35090.1, AT2G27190.1, AT2G02990.1	0.00027	0.0021	Cluster_4
GO:0009066	Biological process	aspartate family amino acid metabolic process	6	0.762389	AT5G53850.2, AT4G38800.1, AT5G17920.1, AT1G64660.1, AT1G05010.1, AT3G63250.1	0.00031	0.0025	Cluster_4
GO:0042594	Biological process	response to starvation	6	0.762389	AT3G47340.1, AT3G03250.1, AT1G23010.1, AT4G35090.1, AT2G27190.1, AT2G02990.1	0.00043	0.0033	Cluster_4
GO:0031669	Biological process	cellular response to nutrient levels	6	0.762389	AT3G47340.1, AT3G03250.1, AT1G23010.1, AT4G35090.1, AT2G27190.1, AT2G02990.1	0.0005	0.0039	Cluster_4
GO:0045333	Biological process	cellular respiration	6	0.762389	AT5G08530.1, AT5G66760.1, AT4G26910.1, AT2G44350.2, AT3G58750.1, AT3G14940.1	0.00057	0.0044	Cluster_4
GO:0015980	Biological process	energy derivation by oxidation of organic compounds	6	0.762389	AT5G08530.1, AT5G66760.1, AT4G26910.1, AT2G44350.2, AT3G58750.1, AT3G14940.1	0.00057	0.0044	Cluster_4
GO:0006073	Biological process	cellular glucan metabolic process	6	0.762389	AT5G51820.1, AT4G15210.1, AT5G03650.1, AT5G66680.1, AT4G09020.1, AT1G10760.1	0.00091	0.007	Cluster_4
GO:0031668	Biological process	cellular response to extracellular stimulus	6	0.762389	AT3G47340.1, AT3G03250.1, AT1G23010.1, AT4G35090.1, AT2G27190.1, AT2G02990.1	0.001	0.0078	Cluster_4
GO:0031667	Biological process	response to nutrient levels	6	0.762389	AT3G47340.1, AT3G03250.1, AT1G23010.1, AT4G35090.1, AT2G27190.1, AT2G02990.1	0.0012	0.0088	Cluster_4
GO:0009991	Biological process	response to extracellular stimulus	6	0.762389	AT3G47340.1, AT3G03250.1, AT1G23010.1, AT4G35090.1, AT2G27190.1, AT2G02990.1	0.0022	0.016	Cluster_4
GO:0009063	Biological process	cellular amino acid catabolic process	5	0.635324	AT3G47340.1, AT5G62530.1, AT1G79440.1, AT5G46180.1, AT1G64660.1	1e-07	1.4e-06	Cluster_4
GO:0009310	Biological process	amine catabolic process	5	0.635324	AT3G47340.1, AT5G62530.1, AT1G79440.1, AT5G46180.1, AT1G64660.1	1e-07	1.4e-06	Cluster_4
GO:0005985	Biological process	sucrose metabolic process	5	0.635324	AT4G02280.1, AT1G73370.1, AT2G35840.1, AT3G03250.1, AT3G43190.1	1e-07	1.4e-06	Cluster_4
GO:0006800	Biological process	oxygen and reactive oxygen species metabolic process	5	0.635324	AT1G08830.1, AT5G62530.1, AT4G35090.1, AT1G79440.1, AT3G52880.2	3.2e-07	4e-06	Cluster_4
GO:0016036	Biological process	cellular response to phosphate starvation	5	0.635324	AT2G27190.1, AT3G03250.1, AT1G23010.1, AT2G02990.1, AT4G35090.1	3.2e-07	4e-06	Cluster_4
GO:0046364	Biological process	monosaccharide biosynthetic process	5	0.635324	AT5G42740.1, AT1G30620.1, AT4G37870.1, AT3G04120.1, AT2G45790.1	7.9e-07	9.5e-06	Cluster_4
GO:0048468	Biological process	cell development	5	0.635324	AT4G38630.1, AT1G62440.1, AT4G29040.1, AT1G20850.1, AT4G26690.1	9.5e-06	9.6e-05	Cluster_4
GO:0019725	Biological process	cellular homeostasis	5	0.635324	AT4G04950.1, AT4G35090.1, AT2G17420.1, AT5G42150.1, AT2G40300.1	1.2e-05	0.00012	Cluster_4
GO:0009165	Biological process	nucleotide biosynthetic process	5	0.635324	AT2G33040.1, AT1G10700.1, AT2G38280.1, AT3G55010.1, AT5G23300.1	4e-05	0.00037	Cluster_4
GO:0042742	Biological process	defense response to bacterium	5	0.635324	AT1G08830.1, AT5G59890.1, AT2G42010.1, AT4G31750.1, AT1G53240.1	5.5e-05	0.00051	Cluster_4
GO:0016265	Biological process	death	5	0.635324	AT1G21750.1, AT2G26560.1, AT1G59218.1, AT1G20850.1, AT4G35090.1	7.6e-05	0.00066	Cluster_4
GO:0008219	Biological process	cell death	5	0.635324	AT1G21750.1, AT2G26560.1, AT1G59218.1, AT1G20850.1, AT4G35090.1	7.6e-05	0.00066	Cluster_4
GO:0048827	Biological process	phyllome development	5	0.635324	AT4G38630.1, AT4G26690.1, AT4G31820.1, AT2G40300.1, AT4G29040.1	8.8e-05	0.00076	Cluster_4
GO:0006605	Biological process	protein targeting	5	0.635324	AT2G28900.1, AT5G11710.1, AT5G55190.1, AT5G16620.1, AT1G27970.2	0.0001	0.00086	Cluster_4
GO:0005982	Biological process	starch metabolic process	5	0.635324	AT4G09020.1, AT5G03650.1, AT4G15210.1, AT1G10760.1, AT5G51820.1	0.00015	0.0013	Cluster_4
GO:0046165	Biological process	alcohol biosynthetic process	5	0.635324	AT5G42740.1, AT1G30620.1, AT4G37870.1, AT3G04120.1, AT2G45790.1	0.00017	0.0014	Cluster_4
GO:0009744	Biological process	response to sucrose stimulus	5	0.635324	AT4G38630.1, AT2G28900.1, AT3G47340.1, AT1G61800.1, AT3G04120.1	0.00022	0.0018	Cluster_4
GO:0034285	Biological process	response to disaccharide stimulus	5	0.635324	AT4G38630.1, AT2G28900.1, AT3G47340.1, AT1G61800.1, AT3G04120.1	0.00025	0.002	Cluster_4
GO:0010817	Biological process	regulation of hormone levels	5	0.635324	AT5G65980.1, AT4G31820.1, AT4G36760.1, AT5G54140.1, AT1G15690.1	0.00034	0.0027	Cluster_4
GO:0009116	Biological process	nucleoside metabolic process	5	0.635324	AT4G01850.1, AT4G38800.1, AT1G10700.1, AT2G19570.1, AT2G36310.1	0.00034	0.0027	Cluster_4
GO:0009845	Biological process	seed germination	5	0.635324	AT4G38630.1, AT5G67360.1, AT3G48330.1, AT4G29010.1, AT4G13850.1	0.002	0.015	Cluster_4
GO:0009743	Biological process	response to carbohydrate stimulus	5	0.635324	AT4G38630.1, AT2G28900.1, AT3G47340.1, AT1G61800.1, AT3G04120.1	0.0021	0.015	Cluster_4
GO:0009642	Biological process	response to light intensity	5	0.635324	AT5G18170.1, AT1G73990.1, AT3G47340.1, AT1G09570.1, AT3G55280.1	0.0035	0.025	Cluster_4
GO:0007568	Biological process	aging	5	0.635324	AT4G38630.1, AT5G60360.3, AT2G02990.1, AT3G48330.1, AT1G79230.1	0.0041	0.029	Cluster_4
GO:0009908	Biological process	flower development	5	0.635324	AT4G38630.1, AT4G31820.1, AT2G02850.1, AT2G40300.1, AT4G29010.1	0.0059	0.042	Cluster_4
GO:0010015	Biological process	root morphogenesis	5	0.635324	AT4G38630.1, AT4G26690.1, AT3G13870.1, AT1G18800.1, AT4G29040.1	0.0079	0.055	Cluster_4
GO:0009620	Biological process	response to fungus	5	0.635324	AT1G05010.1, AT3G12500.1, AT1G10760.1, AT5G42650.1, AT3G60190.1	0.031	0.21	Cluster_4
GO:0003824	Molecular function	catalytic activity	262	33.291	AT1G35620.1, AT5G13110.1, AT3G13920.2, AT3G08590.1, AT3G07130.1, AT1G72990.1, AT5G03340.1, AT5G27600.1, AT5G59300.1, AT1G10760.1, AT1G79230.1, AT3G47520.1, AT1G12050.1, AT3G26720.1, AT5G19740.1, AT1G14210.1, AT1G10430.1, AT4G21585.1, AT1G52570.1, AT4G00570.1, AT3G03250.1, AT3G60190.1, AT3G23490.1, AT1G09570.1, AT4G26910.1, AT4G39120.1, AT2G45790.1, AT5G37980.1, AT5G66680.1, AT3G59140.1, AT4G04950…	4e-56	2.4e-53	Cluster_4
GO:0005488	Molecular function	binding	143	18.1703	AT4G35410.2, AT3G14010.1, AT3G13920.2, AT3G08590.1, AT5G03340.1, AT5G27600.1, AT5G23240.1, AT1G49760.1, AT3G26720.1, AT1G14210.1, AT4G21585.1, AT5G07990.1, AT5G38470.1, AT1G05520.1, AT3G13870.1, AT1G10200.1, AT4G34490.1, AT1G56340.1, AT5G37980.1, AT4G02080.1, AT3G56860.3, AT1G17880.1, AT3G56460.1, AT1G63500.1, AT1G50590.1, AT5G08580.1, AT3G04690.1, AT3G14680.1, AT1G13900.1, AT1G47840.1, AT3G48280…	0.031	0.2	Cluster_4
GO:0016787	Molecular function	hydrolase activity	105	13.3418	AT3G13920.2, AT3G07130.1, AT1G72990.1, AT5G03340.1, AT5G24090.1, AT1G12050.1, AT3G26720.1, AT5G19740.1, AT1G14210.1, AT3G55260.1, AT4G21585.1, AT1G52570.1, AT3G59140.1, AT4G39080.1, AT3G60190.1, AT3G20390.1, AT1G25510.1, AT1G13900.1, AT1G71380.1, AT5G55190.1, AT5G13870.1, AT5G62930.1, AT2G02990.1, AT5G43060.1, AT1G71950.1, AT1G60590.1, AT1G20850.1, AT1G09850.1, AT4G09020.1, AT4G31750.1, AT5G58980…	5.9e-21	5.9e-19	Cluster_4
GO:0016491	Molecular function	oxidoreductase activity	58	7.36976	AT3G06050.1, AT5G13110.1, AT2G13560.1, AT1G53240.1, AT3G04120.1, AT1G06290.1, AT1G23010.1, AT1G07890.3, AT1G23740.1, AT1G59960.1, AT1G05010.1, AT3G45300.1, AT1G75270.1, AT3G24170.1, AT5G07990.1, AT4G00570.1, AT4G35260.1, AT5G40760.1, AT5G37510.2, AT3G02360.2, AT5G07440.1, AT4G33420.1, AT5G17770.1, AT5G42150.1, AT5G37980.1, AT1G79750.1, AT1G08830.1, AT4G04950.1, AT5G14590.1, AT3G56460.1, AT4G36400…	1.3e-31	3.9e-29	Cluster_4
GO:0016740	Molecular function	transferase activity	58	7.36976	AT4G26690.1, AT4G26270.1, AT3G57830.1, AT4G01070.1, AT5G20280.1, AT2G22250.2, AT5G58730.1, AT4G39660.1, AT1G31910.1, AT1G10760.1, AT1G79230.1, AT1G16270.1, AT3G43190.1, AT5G17920.1, AT3G29320.1, AT1G76400.1, AT3G03250.1, AT1G73600.2, AT4G34131.1, AT1G06410.1, AT4G26910.1, AT2G44350.2, AT5G66680.1, AT5G48380.1, AT5G47810.1, AT4G09320.1, AT5G46180.1, AT5G54160.1, AT1G63500.1, AT4G35160.1, AT3G23530…	1.2e-21	1.4e-19	Cluster_4
GO:0005515	Molecular function	protein binding	39	4.95553	AT4G35410.2, AT3G14010.1, AT4G15040.1, AT1G78230.1, AT2G36060.2, AT2G41740.1, AT1G63180.1, AT5G27600.1, AT5G59300.1, AT5G24870.1, AT5G23240.1, AT4G20260.4, AT5G56600.1, AT1G18800.1, AT2G19760.1, AT5G17330.1, AT3G05530.1, AT1G05520.1, AT4G35160.1, AT2G42800.1, AT4G34490.1, AT1G56140.1, AT1G59218.1, AT1G50590.1, AT1G27970.2, AT2G20760.1, AT3G13930.1, AT5G55190.1, AT2G42810.2, AT1G33590.1, AT3G18190…	3.3e-09	1e-07	Cluster_4
GO:0043169	Molecular function	cation binding	37	4.7014	AT4G34480.1, AT1G23740.1, AT3G08590.1, AT1G65540.1, AT1G09010.1, AT5G24090.1, AT1G76180.1, AT5G24870.1, AT1G70670.1, AT3G26720.1, AT4G20260.4, AT2G20680.1, AT5G53850.2, AT1G65930.1, AT1G05520.1, AT1G62810.1, AT5G08680.1, AT5G08580.1, AT5G53870.1, AT1G56340.1, AT5G37980.1, AT2G02850.1, AT3G56460.1, AT5G13440.1, AT4G33420.1, AT5G20990.1, AT1G13900.1, AT5G15350.1, AT2G35840.1, AT1G10700.1, AT2G40300…	2e-22	3.1e-20	Cluster_4
GO:0043167	Molecular function	ion binding	37	4.7014	AT4G34480.1, AT1G23740.1, AT3G08590.1, AT1G65540.1, AT1G09010.1, AT5G24090.1, AT1G76180.1, AT5G24870.1, AT1G70670.1, AT3G26720.1, AT4G20260.4, AT2G20680.1, AT5G53850.2, AT1G65930.1, AT1G05520.1, AT1G62810.1, AT5G08680.1, AT5G08580.1, AT5G53870.1, AT1G56340.1, AT5G37980.1, AT2G02850.1, AT3G56460.1, AT5G13440.1, AT4G33420.1, AT5G20990.1, AT1G13900.1, AT5G15350.1, AT2G35840.1, AT1G10700.1, AT2G40300…	2e-22	3.1e-20	Cluster_4
GO:0000166	Molecular function	nucleotide binding	36	4.57433	AT1G78900.1, AT2G13560.1, AT4G09320.1, AT5G03340.1, AT1G31910.1, AT2G05830.1, AT3G57830.1, AT3G18820.1, AT1G09630.1, AT4G27270.1, AT3G18190.1, AT3G13870.1, AT4G00570.1, AT4G37870.1, AT5G28060.1, AT1G56140.1, AT2G05710.1, AT1G59218.1, AT1G08410.1, AT1G63500.1, AT3G60190.1, AT3G04690.1, AT3G02360.2, AT4G20840.1, AT2G27600.1, AT1G47840.1, AT5G55190.1, AT3G09440.1, AT4G02080.1, AT3G48990.1, AT2G14750…	0.023	0.16	Cluster_4
GO:0046872	Molecular function	metal ion binding	33	4.19314	AT1G23740.1, AT3G08590.1, AT1G65540.1, AT1G76180.1, AT5G24870.1, AT1G70670.1, AT3G26720.1, AT4G20260.4, AT5G53850.2, AT1G65930.1, AT1G05520.1, AT1G62810.1, AT5G08680.1, AT5G08580.1, AT5G53870.1, AT1G56340.1, AT5G37980.1, AT2G02850.1, AT3G56460.1, AT5G13440.1, AT4G33420.1, AT5G20990.1, AT1G13900.1, AT5G15350.1, AT2G35840.1, AT1G10700.1, AT2G40300.1, AT5G24760.1, AT1G23010.1, AT5G56350.1, AT4G33070…	4.3e-19	3.7e-17	Cluster_4
GO:0016788	Molecular function	hydrolase activity, acting on ester bonds	32	4.06607	AT4G26690.1, AT2G26560.1, AT1G53920.1, AT5G53850.2, AT1G29660.1, AT5G63980.1, AT3G05610.1, AT1G10430.1, AT4G21585.1, AT1G52570.1, AT1G14210.1, AT1G06410.1, AT4G28400.1, AT4G39120.1, AT2G27190.1, AT3G07130.1, AT2G42010.1, AT3G14310.1, AT5G53370.1, AT3G50440.1, AT3G20390.1, AT5G34850.1, AT2G42810.2, AT5G62930.1, AT2G02990.1, AT1G13900.1, AT2G35840.1, AT4G16820.1, AT4G17510.1, AT1G11580.1, AT4G31750…	4.5e-06	8e-05	Cluster_4
GO:0005215	Molecular function	transporter activity	29	3.68488	AT4G35410.2, AT1G78900.1, AT1G15520.1, AT4G00430.1, AT2G38410.1, AT5G65980.1, AT1G80300.1, AT5G57490.1, AT1G05520.1, AT1G61800.1, AT2G05170.1, AT5G08680.1, AT5G52450.1, AT5G16880.1, AT1G27970.2, AT3G59140.1, AT3G53420.1, AT3G01280.1, AT1G52190.1, AT5G54800.1, AT1G12840.1, AT2G37170.1, AT4G35300.1, AT1G72160.1, AT3G06720.1, AT2G28900.1, AT4G28390.1, AT2G33040.1, AT1G15690.1	2.8e-12	1.5e-10	Cluster_4
GO:0017076	Molecular function	purine nucleotide binding	29	3.68488	AT1G78900.1, AT2G13560.1, AT4G09320.1, AT5G03340.1, AT1G31910.1, AT2G05830.1, AT3G57830.1, AT3G18820.1, AT1G09630.1, AT3G09440.1, AT3G13870.1, AT4G00570.1, AT4G37870.1, AT1G56140.1, AT2G05710.1, AT1G59218.1, AT1G08410.1, AT1G63500.1, AT3G60190.1, AT3G04690.1, AT5G48380.1, AT4G20840.1, AT2G27600.1, AT1G47840.1, AT5G55190.1, AT3G18190.1, AT4G02080.1, AT3G48990.1, AT2G14750.1	5.9e-06	0.0001	Cluster_4
GO:0032555	Molecular function	purine ribonucleotide binding	28	3.55781	AT1G78900.1, AT2G13560.1, AT4G09320.1, AT5G03340.1, AT1G31910.1, AT2G05830.1, AT3G57830.1, AT3G18820.1, AT1G09630.1, AT3G09440.1, AT3G13870.1, AT4G00570.1, AT4G02080.1, AT4G37870.1, AT1G56140.1, AT2G05710.1, AT1G59218.1, AT1G08410.1, AT1G63500.1, AT3G60190.1, AT3G04690.1, AT2G27600.1, AT1G47840.1, AT5G55190.1, AT3G18190.1, AT5G48380.1, AT3G48990.1, AT2G14750.1	1.6e-05	0.00023	Cluster_4
GO:0032553	Molecular function	ribonucleotide binding	28	3.55781	AT1G78900.1, AT2G13560.1, AT4G09320.1, AT5G03340.1, AT1G31910.1, AT2G05830.1, AT3G57830.1, AT3G18820.1, AT1G09630.1, AT3G09440.1, AT3G13870.1, AT4G00570.1, AT4G02080.1, AT4G37870.1, AT1G56140.1, AT2G05710.1, AT1G59218.1, AT1G08410.1, AT1G63500.1, AT3G60190.1, AT3G04690.1, AT2G27600.1, AT1G47840.1, AT5G55190.1, AT3G18190.1, AT5G48380.1, AT3G48990.1, AT2G14750.1	1.6e-05	0.00023	Cluster_4
GO:0016798	Molecular function	hydrolase activity, acting on glycosyl bonds	25	3.17662	AT4G34480.1, AT1G72990.1, AT5G24090.1, AT3G26720.1, AT2G20680.1, AT3G55260.1, AT2G32810.1, AT2G36310.1, AT3G26380.1, AT2G28470.1, AT1G65590.1, AT4G15210.1, AT5G49360.1, AT5G13690.1, AT1G71380.1, AT5G13870.1, AT5G20950.1, AT4G26140.1, AT4G38800.1, AT3G12500.1, AT1G09010.1, AT4G36360.1, AT3G10740.1, AT1G60590.1, AT4G09020.1	6.3e-09	1.8e-07	Cluster_4
GO:0008233	Molecular function	peptidase activity	25	3.17662	AT4G15040.1, AT3G47060.1, AT3G02090.2, AT5G19740.1, AT4G14570.1, AT4G20850.1, AT5G67360.1, AT1G11910.1, AT4G36760.1, AT1G02305.1, AT4G36195.1, AT1G25510.1, AT3G14290.1, AT5G54140.1, AT2G21430.1, AT2G47390.1, AT5G43060.1, AT1G71950.1, AT2G27920.1, AT1G09850.1, AT1G20850.1, AT1G16470.1, AT1G73990.1, AT5G60360.3, AT3G63470.1	1.9e-07	4.2e-06	Cluster_4
GO:0070011	Molecular function	peptidase activity, acting on L-amino acid peptides	23	2.92249	AT4G15040.1, AT3G47060.1, AT3G02090.2, AT5G19740.1, AT4G14570.1, AT4G20850.1, AT5G67360.1, AT1G11910.1, AT4G36760.1, AT1G02305.1, AT4G36195.1, AT1G25510.1, AT5G54140.1, AT2G21430.1, AT2G47390.1, AT5G43060.1, AT1G71950.1, AT2G27920.1, AT1G09850.1, AT1G20850.1, AT1G73990.1, AT5G60360.3, AT3G63470.1	4.5e-07	9e-06	Cluster_4
GO:0004553	Molecular function	hydrolase activity, hydrolyzing O-glycosyl compounds	21	2.66836	AT3G55260.1, AT1G65590.1, AT4G34480.1, AT4G36360.1, AT3G12500.1, AT2G28470.1, AT1G60590.1, AT4G15210.1, AT2G32810.1, AT1G09010.1, AT1G72990.1, AT5G49360.1, AT5G24090.1, AT5G13690.1, AT1G71380.1, AT5G20950.1, AT3G26380.1, AT4G09020.1, AT3G26720.1, AT4G26140.1, AT2G20680.1	3.2e-07	6.7e-06	Cluster_4
GO:0001883	Molecular function	purine nucleoside binding	21	2.66836	AT3G48990.1, AT1G78900.1, AT2G14750.1, AT3G57830.1, AT1G63500.1, AT3G18190.1, AT4G09320.1, AT5G48380.1, AT1G31910.1, AT5G03340.1, AT4G20840.1, AT4G37870.1, AT1G47840.1, AT2G27600.1, AT1G56140.1, AT2G05710.1, AT1G59218.1, AT4G00570.1, AT3G09440.1, AT3G04690.1, AT2G13560.1	0.00033	0.0032	Cluster_4
GO:0001882	Molecular function	nucleoside binding	21	2.66836	AT3G48990.1, AT1G78900.1, AT2G14750.1, AT3G57830.1, AT1G63500.1, AT3G18190.1, AT4G09320.1, AT5G48380.1, AT1G31910.1, AT5G03340.1, AT4G20840.1, AT4G37870.1, AT1G47840.1, AT2G27600.1, AT1G56140.1, AT2G05710.1, AT1G59218.1, AT4G00570.1, AT3G09440.1, AT3G04690.1, AT2G13560.1	0.00033	0.0032	Cluster_4
GO:0030554	Molecular function	adenyl nucleotide binding	21	2.66836	AT3G48990.1, AT1G78900.1, AT2G14750.1, AT3G57830.1, AT1G63500.1, AT3G18190.1, AT4G09320.1, AT5G48380.1, AT1G31910.1, AT5G03340.1, AT4G20840.1, AT4G37870.1, AT1G47840.1, AT2G27600.1, AT1G56140.1, AT2G05710.1, AT1G59218.1, AT4G00570.1, AT3G09440.1, AT3G04690.1, AT2G13560.1	0.00033	0.0032	Cluster_4
GO:0046914	Molecular function	transition metal ion binding	20	2.5413	AT1G23740.1, AT4G20260.4, AT2G02850.1, AT5G24870.1, AT2G40300.1, AT5G24760.1, AT4G33420.1, AT3G08590.1, AT5G20990.1, AT1G23010.1, AT5G08680.1, AT1G65930.1, AT1G62810.1, AT5G53870.1, AT5G53560.1, AT5G37980.1, AT1G05520.1, AT3G26720.1, AT5G15350.1, AT3G56460.1	1.7e-11	7.4e-10	Cluster_4
GO:0016772	Molecular function	transferase activity, transferring phosphorus-containing groups	20	2.5413	AT1G47840.1, AT4G26690.1, AT1G09570.1, AT1G63500.1, AT2G14750.1, AT4G26270.1, AT5G58730.1, AT3G03250.1, AT1G31910.1, AT5G56350.1, AT1G10700.1, AT3G04690.1, AT1G10760.1, AT3G57830.1, AT1G56140.1, AT1G16270.1, AT5G48380.1, AT5G47810.1, AT4G09320.1, AT2G22480.1	6.9e-06	0.00011	Cluster_4
GO:0032559	Molecular function	adenyl ribonucleotide binding	20	2.5413	AT3G48990.1, AT3G57830.1, AT1G63500.1, AT4G37870.1, AT2G14750.1, AT3G18190.1, AT4G09320.1, AT5G48380.1, AT1G31910.1, AT5G03340.1, AT1G78900.1, AT1G47840.1, AT2G27600.1, AT1G56140.1, AT2G05710.1, AT1G59218.1, AT4G00570.1, AT3G09440.1, AT3G04690.1, AT2G13560.1	0.0008	0.007	Cluster_4
GO:0022857	Molecular function	transmembrane transporter activity	20	2.5413	AT1G80300.1, AT1G78900.1, AT5G57490.1, AT3G01280.1, AT5G65980.1, AT2G37170.1, AT5G54800.1, AT1G12840.1, AT1G61800.1, AT4G00430.1, AT5G08680.1, AT2G28900.1, AT4G28390.1, AT5G52450.1, AT3G59140.1, AT2G33040.1, AT1G15520.1, AT3G53420.1, AT1G15690.1, AT4G35300.1	0.035	0.22	Cluster_4
GO:0005524	Molecular function	ATP binding	19	2.41423	AT3G57830.1, AT1G63500.1, AT4G37870.1, AT2G14750.1, AT3G18190.1, AT4G09320.1, AT5G48380.1, AT1G31910.1, AT5G03340.1, AT1G78900.1, AT1G47840.1, AT2G27600.1, AT1G56140.1, AT2G05710.1, AT1G59218.1, AT4G00570.1, AT3G09440.1, AT3G04690.1, AT2G13560.1	0.0019	0.015	Cluster_4
GO:0022892	Molecular function	substrate-specific transporter activity	19	2.41423	AT4G35410.2, AT1G78900.1, AT5G57490.1, AT3G01280.1, AT5G65980.1, AT2G37170.1, AT5G54800.1, AT1G12840.1, AT1G61800.1, AT4G00430.1, AT2G38410.1, AT5G08680.1, AT3G06720.1, AT2G28900.1, AT5G16880.1, AT1G27970.2, AT2G33040.1, AT3G53420.1, AT4G35300.1	0.032	0.21	Cluster_4
GO:0016301	Molecular function	kinase activity	18	2.28717	AT1G47840.1, AT4G26690.1, AT1G09570.1, AT1G63500.1, AT2G14750.1, AT5G58730.1, AT1G31910.1, AT5G56350.1, AT4G26270.1, AT3G04690.1, AT1G10760.1, AT3G57830.1, AT1G56140.1, AT1G16270.1, AT5G48380.1, AT5G47810.1, AT4G09320.1, AT2G22480.1	3.1e-05	0.00038	Cluster_4
GO:0016829	Molecular function	lyase activity	17	2.1601	AT5G23960.1, AT3G14940.1, AT5G17330.1, AT4G29010.1, AT3G61440.1, AT3G46440.1, AT1G64660.1, AT2G37040.1, AT3G23490.1, AT5G43280.1, AT4G37870.1, AT5G42650.1, AT4G33070.1, AT2G05710.1, AT3G51450.1, AT1G69740.1, AT4G14880.1	2.4e-14	1.7e-12	Cluster_4
GO:0042578	Molecular function	phosphoric ester hydrolase activity	17	2.1601	AT4G26690.1, AT2G35840.1, AT2G42010.1, AT1G52570.1, AT1G10430.1, AT3G07130.1, AT1G13900.1, AT5G53850.2, AT1G06410.1, AT4G28400.1, AT4G39120.1, AT2G27190.1, AT2G42810.2, AT5G63980.1, AT4G31750.1, AT5G34850.1, AT4G17770.1	1.6e-05	0.00023	Cluster_4
GO:0016757	Molecular function	transferase activity, transferring glycosyl groups	16	2.03304	AT5G20280.1, AT3G46970.1, AT4G01070.1, AT3G29320.1, AT1G76400.1, AT1G22380.1, AT4G34131.1, AT1G06410.1, AT1G05680.1, AT5G03650.1, AT5G66680.1, AT4G02280.1, AT1G73370.1, AT3G43190.1, AT4G17770.1, AT3G50740.1	0.00094	0.008	Cluster_4
GO:0016758	Molecular function	transferase activity, transferring hexosyl groups	15	1.90597	AT5G20280.1, AT3G46970.1, AT4G01070.1, AT3G29320.1, AT1G76400.1, AT1G22380.1, AT4G34131.1, AT1G06410.1, AT1G05680.1, AT5G03650.1, AT5G66680.1, AT4G02280.1, AT1G73370.1, AT3G43190.1, AT3G50740.1	2.6e-14	1.7e-12	Cluster_4
GO:0017111	Molecular function	nucleoside-triphosphatase activity	15	1.90597	AT3G05530.1, AT3G60190.1, AT1G12840.1, AT3G13920.2, AT1G15520.1, AT5G03340.1, AT3G47060.1, AT3G59140.1, AT2G24520.1, AT5G55190.1, AT2G33040.1, AT4G39080.1, AT5G19990.1, AT1G15690.1, AT4G29040.1	0.048	0.3	Cluster_4
GO:0005198	Molecular function	structural molecule activity	14	1.77891	AT1G05190.1, AT4G34670.1, AT5G44340.1, AT5G27770.1, AT3G20970.1, AT1G62440.1, AT4G16720.1, AT3G09630.1, AT3G55280.1, AT2G20760.1, AT5G58420.1, AT5G28060.1, AT1G09690.1, AT5G47700.1	2.1e-12	1.3e-10	Cluster_4
GO:0016614	Molecular function	oxidoreductase activity, acting on CH-OH group of donors	14	1.77891	AT4G36400.1, AT5G13110.1, AT2G13560.1, AT4G39230.1, AT4G35260.1, AT1G79750.1, AT5G14590.1, AT1G53240.1, AT5G40760.1, AT5G63890.2, AT3G02360.2, AT1G65930.1, AT3G47520.1, AT4G00570.1	4.1e-08	9.6e-07	Cluster_4
GO:0016791	Molecular function	phosphatase activity	14	1.77891	AT1G10430.1, AT2G35840.1, AT5G53850.2, AT3G07130.1, AT1G13900.1, AT1G06410.1, AT4G28400.1, AT4G39120.1, AT2G27190.1, AT2G42810.2, AT5G63980.1, AT4G31750.1, AT5G34850.1, AT4G17770.1	9.3e-05	0.00097	Cluster_4
GO:0016887	Molecular function	ATPase activity	13	1.65184	AT3G05530.1, AT3G13920.2, AT1G12840.1, AT1G15520.1, AT5G03340.1, AT3G47060.1, AT3G59140.1, AT2G24520.1, AT2G33040.1, AT4G39080.1, AT5G19990.1, AT1G15690.1, AT4G29040.1	3.5e-10	1.2e-08	Cluster_4
GO:0016853	Molecular function	isomerase activity	13	1.65184	AT1G35620.1, AT2G29960.1, AT3G54960.1, AT3G61610.1, AT3G08590.1, AT2G45790.1, AT1G63180.1, AT1G21750.1, AT5G51820.1, AT5G42740.1, AT5G43280.1, AT1G30620.1, AT5G60640.1	4e-10	1.3e-08	Cluster_4
GO:0022804	Molecular function	active transmembrane transporter activity	13	1.65184	AT1G80300.1, AT1G15520.1, AT5G65980.1, AT5G54800.1, AT1G12840.1, AT1G61800.1, AT2G28900.1, AT4G28390.1, AT5G52450.1, AT3G59140.1, AT2G33040.1, AT1G15690.1, AT4G35300.1	0.044	0.28	Cluster_4
GO:0004175	Molecular function	endopeptidase activity	11	1.39771	AT3G02090.2, AT5G43060.1, AT1G71950.1, AT1G73990.1, AT5G67360.1, AT4G15040.1, AT1G25510.1, AT1G11910.1, AT2G21430.1, AT2G47390.1, AT1G02305.1	5.5e-11	2.2e-09	Cluster_4
GO:0008194	Molecular function	UDP-glycosyltransferase activity	10	1.27065	AT5G20280.1, AT3G50740.1, AT4G01070.1, AT1G22380.1, AT4G34131.1, AT1G06410.1, AT1G05680.1, AT4G02280.1, AT1G73370.1, AT3G43190.1	7.4e-10	2.4e-08	Cluster_4
GO:0016651	Molecular function	oxidoreductase activity, acting on NADH or NADPH	10	1.27065	AT3G24170.1, AT2G17420.1, AT5G08530.1, AT1G79750.1, AT4G00570.1, AT5G37510.2, AT5G17770.1, AT5G67590.1, AT2G13560.1, AT3G52880.2	6.5e-07	1.3e-05	Cluster_4
GO:0017171	Molecular function	serine hydrolase activity	10	1.27065	AT4G15040.1, AT1G71950.1, AT4G14570.1, AT2G27920.1, AT2G47390.1, AT1G73990.1, AT5G67360.1, AT3G63470.1, AT4G20850.1, AT4G36195.1	8.3e-05	0.00089	Cluster_4
GO:0008236	Molecular function	serine-type peptidase activity	10	1.27065	AT4G15040.1, AT1G71950.1, AT4G14570.1, AT2G27920.1, AT2G47390.1, AT1G73990.1, AT5G67360.1, AT3G63470.1, AT4G20850.1, AT4G36195.1	8.3e-05	0.00089	Cluster_4
GO:0003735	Molecular function	structural constituent of ribosome	10	1.27065	AT1G05190.1, AT4G34670.1, AT5G27770.1, AT4G16720.1, AT3G09630.1, AT3G55280.1, AT5G58420.1, AT5G28060.1, AT1G09690.1, AT5G47700.1	0.047	0.3	Cluster_4
GO:0016616	Molecular function	oxidoreductase activity, acting on the CH-OH group of donors, NAD or NADP as acceptor	9	1.14358	AT5G13110.1, AT4G39230.1, AT4G35260.1, AT1G79750.1, AT5G14590.1, AT5G40760.1, AT5G63890.2, AT3G02360.2, AT1G65930.1	5.8e-12	2.9e-10	Cluster_4
GO:0046527	Molecular function	glucosyltransferase activity	9	1.14358	AT5G20280.1, AT3G50740.1, AT4G01070.1, AT4G34131.1, AT1G06410.1, AT1G05680.1, AT4G02280.1, AT1G73370.1, AT3G43190.1	2.1e-10	8e-09	Cluster_4
GO:0016209	Molecular function	antioxidant activity	9	1.14358	AT3G24170.1, AT3G06050.1, AT2G17420.1, AT1G65980.1, AT4G33420.1, AT4G35090.1, AT1G07890.3, AT1G08830.1, AT1G75270.1	3e-08	7.3e-07	Cluster_4
GO:0004091	Molecular function	carboxylesterase activity	9	1.14358	AT4G16820.1, AT3G14310.1, AT5G53370.1, AT3G50440.1, AT1G53920.1, AT5G62930.1, AT1G29660.1, AT1G11580.1, AT3G05610.1	2.3e-06	4.3e-05	Cluster_4
GO:0035251	Molecular function	UDP-glucosyltransferase activity	9	1.14358	AT5G20280.1, AT3G50740.1, AT4G01070.1, AT4G34131.1, AT1G06410.1, AT1G05680.1, AT4G02280.1, AT1G73370.1, AT3G43190.1	5.3e-06	9.1e-05	Cluster_4
GO:0005507	Molecular function	copper ion binding	8	1.01652	AT2G02850.1, AT4G20260.4, AT1G65930.1, AT1G23010.1, AT5G08680.1, AT1G62810.1, AT5G53870.1, AT5G15350.1	1.2e-11	5.6e-10	Cluster_4
GO:0016835	Molecular function	carbon-oxygen lyase activity	8	1.01652	AT5G42650.1, AT3G61440.1, AT4G29010.1, AT5G23960.1, AT2G05710.1, AT5G43280.1, AT1G69740.1, AT4G14880.1	1.4e-08	3.8e-07	Cluster_4
GO:0016810	Molecular function	hydrolase activity, acting on carbon-nitrogen (but not peptide) bonds	8	1.01652	AT2G19570.1, AT1G67550.1, AT5G54140.1, AT4G37560.1, AT2G38280.1, AT5G08100.1, AT5G58980.1, AT4G34880.1	1.8e-08	4.4e-07	Cluster_4
GO:0004722	Molecular function	protein serine/threonine phosphatase activity	8	1.01652	AT1G10430.1, AT3G07130.1, AT1G13900.1, AT4G28400.1, AT2G27190.1, AT2G42810.2, AT4G31750.1, AT5G34850.1	3e-06	5.5e-05	Cluster_4
GO:0004721	Molecular function	phosphoprotein phosphatase activity	8	1.01652	AT1G10430.1, AT3G07130.1, AT1G13900.1, AT4G28400.1, AT2G27190.1, AT2G42810.2, AT4G31750.1, AT5G34850.1	1.8e-05	0.00026	Cluster_4
GO:0019001	Molecular function	guanyl nucleotide binding	8	1.01652	AT3G60190.1, AT3G13870.1, AT1G08410.1, AT2G05830.1, AT5G55190.1, AT3G18820.1, AT4G02080.1, AT1G09630.1	0.0073	0.054	Cluster_4
GO:0032561	Molecular function	guanyl ribonucleotide binding	8	1.01652	AT3G60190.1, AT3G13870.1, AT1G08410.1, AT2G05830.1, AT5G55190.1, AT3G18820.1, AT4G02080.1, AT1G09630.1	0.0073	0.054	Cluster_4
GO:0005525	Molecular function	GTP binding	8	1.01652	AT3G60190.1, AT3G13870.1, AT1G08410.1, AT2G05830.1, AT5G55190.1, AT3G18820.1, AT4G02080.1, AT1G09630.1	0.0073	0.054	Cluster_4
GO:0019825	Molecular function	oxygen binding	8	1.01652	AT4G37370.1, AT4G31940.1, AT5G07990.1, AT5G25140.1, AT3G14680.1, AT5G63450.1, AT3G48280.1, AT5G42650.1	0.016	0.11	Cluster_4
GO:0016746	Molecular function	transferase activity, transferring acyl groups	8	1.01652	AT5G41120.1, AT1G74960.2, AT5G48930.1, AT4G26910.1, AT3G13930.1, AT2G44350.2, AT3G58750.1, AT1G03495.1	0.03	0.2	Cluster_4
GO:0009055	Molecular function	electron carrier activity	8	1.01652	AT4G36400.1, AT3G23530.1, AT4G33420.1, AT4G20840.1, AT5G53870.1, AT5G42150.1, AT4G04950.1, AT5G15350.1	0.032	0.21	Cluster_4
GO:0008168	Molecular function	methyltransferase activity	7	0.889454	AT5G17920.1, AT3G23530.1, AT4G35160.1, AT3G48330.1, AT1G73600.2, AT3G63250.1, AT5G54160.1	2.7e-05	0.00035	Cluster_4
GO:0016741	Molecular function	transferase activity, transferring one-carbon groups	7	0.889454	AT5G17920.1, AT3G23530.1, AT4G35160.1, AT3G48330.1, AT1G73600.2, AT3G63250.1, AT5G54160.1	3e-05	0.00038	Cluster_4
GO:0015291	Molecular function	secondary active transmembrane transporter activity	7	0.889454	AT1G80300.1, AT1G61800.1, AT5G54800.1, AT5G65980.1, AT4G28390.1, AT5G52450.1, AT4G35300.1	4.1e-05	0.00049	Cluster_4
GO:0016903	Molecular function	oxidoreductase activity, acting on the aldehyde or oxo group of donors	7	0.889454	AT1G44170.1, AT5G50850.1, AT3G04120.1, AT1G79440.1, AT3G48000.1, AT5G62530.1, AT1G59900.1	5.9e-05	0.00065	Cluster_4
GO:0005509	Molecular function	calcium ion binding	7	0.889454	AT5G08580.1, AT1G65540.1, AT1G76180.1, AT1G56340.1, AT1G70670.1, AT5G65020.1, AT4G20260.4	0.00037	0.0035	Cluster_4
GO:0008270	Molecular function	zinc ion binding	7	0.889454	AT1G23740.1, AT5G24760.1, AT1G05520.1, AT5G24870.1, AT5G37980.1, AT3G26720.1, AT3G56460.1	0.0078	0.055	Cluster_4
GO:0016627	Molecular function	oxidoreductase activity, acting on the CH-CH group of donors	6	0.762389	AT3G06810.1, AT5G66760.1, AT1G06290.1, AT5G23300.1, AT3G45300.1, AT4G01690.1	1.6e-08	4.2e-07	Cluster_4
GO:0016860	Molecular function	intramolecular oxidoreductase activity	6	0.762389	AT1G35620.1, AT3G54960.1, AT1G21750.1, AT5G42740.1, AT5G43280.1, AT5G60640.1	5e-05	0.00057	Cluster_4
GO:0015399	Molecular function	primary active transmembrane transporter activity	6	0.762389	AT1G12840.1, AT1G15520.1, AT2G28900.1, AT3G59140.1, AT2G33040.1, AT1G15690.1	5e-05	0.00057	Cluster_4
GO:0015405	Molecular function	P-P-bond-hydrolysis-driven transmembrane transporter activity	6	0.762389	AT1G12840.1, AT1G15520.1, AT2G28900.1, AT3G59140.1, AT2G33040.1, AT1G15690.1	5e-05	0.00057	Cluster_4
GO:0015925	Molecular function	galactosidase activity	6	0.762389	AT2G28470.1, AT2G32810.1, AT1G72990.1, AT4G36360.1, AT3G26380.1, AT4G26140.1	5.6e-05	0.00063	Cluster_4
GO:0042623	Molecular function	ATPase activity, coupled	6	0.762389	AT3G13920.2, AT1G12840.1, AT1G15520.1, AT3G47060.1, AT3G59140.1, AT2G33040.1	0.00021	0.0021	Cluster_4
GO:0008135	Molecular function	translation factor activity, nucleic acid binding	6	0.762389	AT3G13920.2, AT3G60240.4, AT3G11400.2, AT1G13950.1, AT2G05830.1, AT1G49760.1	0.0016	0.013	Cluster_4
GO:0003743	Molecular function	translation initiation factor activity	6	0.762389	AT3G13920.2, AT3G60240.4, AT3G11400.2, AT1G13950.1, AT2G05830.1, AT1G49760.1	0.0018	0.015	Cluster_4
GO:0008234	Molecular function	cysteine-type peptidase activity	6	0.762389	AT5G43060.1, AT1G09850.1, AT1G20850.1, AT2G21430.1, AT5G60360.3, AT1G02305.1	0.019	0.13	Cluster_4
GO:0016620	Molecular function	oxidoreductase activity, acting on the aldehyde or oxo group of donors, NAD or NADP as acceptor	5	0.635324	AT1G44170.1, AT5G62530.1, AT3G04120.1, AT1G79440.1, AT3G48000.1	1.9e-07	4.2e-06	Cluster_4
GO:0016298	Molecular function	lipase activity	5	0.635324	AT2G26560.1, AT1G53920.1, AT2G42010.1, AT4G16820.1, AT1G52570.1	7.4e-06	0.00012	Cluster_4
GO:0016615	Molecular function	malate dehydrogenase activity	5	0.635324	AT1G79750.1, AT3G47520.1, AT4G00570.1, AT2G13560.1, AT1G53240.1	7.4e-06	0.00012	Cluster_4
GO:0022838	Molecular function	substrate-specific channel activity	5	0.635324	AT5G57490.1, AT2G37170.1, AT3G53420.1, AT3G01280.1, AT4G00430.1	2.3e-05	0.0003	Cluster_4
GO:0015267	Molecular function	channel activity	5	0.635324	AT5G57490.1, AT2G37170.1, AT3G53420.1, AT3G01280.1, AT4G00430.1	2.3e-05	0.0003	Cluster_4
GO:0022803	Molecular function	passive transmembrane transporter activity	5	0.635324	AT5G57490.1, AT2G37170.1, AT3G53420.1, AT3G01280.1, AT4G00430.1	2.3e-05	0.0003	Cluster_4
GO:0004565	Molecular function	beta-galactosidase activity	5	0.635324	AT4G36360.1, AT2G28470.1, AT2G32810.1, AT4G26140.1, AT1G72990.1	0.00034	0.0033	Cluster_4
GO:0003779	Molecular function	actin binding	5	0.635324	AT2G19760.1, AT2G19770.1, AT4G34490.1, AT5G56600.1, AT2G41740.1	0.00056	0.0052	Cluster_4
GO:0016830	Molecular function	carbon-carbon lyase activity	5	0.635324	AT3G46440.1, AT3G14940.1, AT4G37870.1, AT5G17330.1, AT4G33070.1	0.00061	0.0056	Cluster_4
GO:0008415	Molecular function	acyltransferase activity	5	0.635324	AT5G41120.1, AT1G74960.2, AT3G13930.1, AT4G26910.1, AT5G48930.1	0.00067	0.006	Cluster_4
GO:0015297	Molecular function	antiporter activity	5	0.635324	AT5G54800.1, AT1G80300.1, AT1G61800.1, AT5G52450.1, AT4G28390.1	0.00067	0.006	Cluster_4
GO:0030246	Molecular function	carbohydrate binding	5	0.635324	AT3G26720.1, AT1G78830.1, AT3G62360.1, AT3G61610.1, AT5G03700.1	0.00073	0.0065	Cluster_4
GO:0016811	Molecular function	hydrolase activity, acting on carbon-nitrogen (but not peptide) bonds, in linear amides	5	0.635324	AT4G37560.1, AT5G08100.1, AT1G67550.1, AT5G58980.1, AT4G34880.1	0.0015	0.013	Cluster_4
GO:0016831	Molecular function	carboxy-lyase activity	5	0.635324	AT3G46440.1, AT3G14940.1, AT4G37870.1, AT5G17330.1, AT4G33070.1	0.0019	0.015	Cluster_4
GO:0004252	Molecular function	serine-type endopeptidase activity	5	0.635324	AT1G73990.1, AT4G15040.1, AT1G71950.1, AT5G67360.1, AT2G47390.1	0.002	0.016	Cluster_4
GO:0016836	Molecular function	hydro-lyase activity	5	0.635324	AT2G05710.1, AT5G43280.1, AT1G69740.1, AT4G29010.1, AT5G42650.1	0.0033	0.025	Cluster_4
GO:0008238	Molecular function	exopeptidase activity	5	0.635324	AT5G19740.1, AT4G20850.1, AT4G36760.1, AT3G63470.1, AT2G27920.1	0.0051	0.039	Cluster_4
GO:0008757	Molecular function	S-adenosylmethionine-dependent methyltransferase activity	5	0.635324	AT3G23530.1, AT1G73600.2, AT5G54160.1, AT3G48330.1, AT3G63250.1	0.0065	0.049	Cluster_4
GO:0008092	Molecular function	cytoskeletal protein binding	5	0.635324	AT2G19760.1, AT2G19770.1, AT4G34490.1, AT5G56600.1, AT2G41740.1	0.0075	0.054	Cluster_4
GO:0016667	Molecular function	oxidoreductase activity, acting on sulfur group of donors	5	0.635324	AT3G24170.1, AT4G04950.1, AT2G17420.1, AT5G42150.1, AT1G75270.1	0.0086	0.061	Cluster_4
GO:0044464	Cellular component	cell part	276	35.0699	AT4G35410.2, AT4G37370.1, AT5G13110.1, AT3G05500.1, AT2G39700.1, AT5G47530.1, AT3G08590.1, AT5G64260.1, AT3G55260.1, AT5G03340.1, AT5G27600.1, AT4G33270.1, AT5G58420.1, AT5G23240.1, AT1G10760.1, AT1G79230.1, AT3G47520.1, AT3G26720.1, AT5G19740.1, AT1G14210.1, AT1G10430.1, AT3G14940.1, AT5G17920.1, AT5G57490.1, AT5G38470.1, AT1G05520.1, AT3G13870.1, AT3G13920.2, AT5G66840.1, AT4G31820.1, AT1G56340…	4.5e-76	8.5e-74	Cluster_4
GO:0005623	Cellular component	cell	276	35.0699	AT4G35410.2, AT4G37370.1, AT5G13110.1, AT3G05500.1, AT2G39700.1, AT5G47530.1, AT3G08590.1, AT5G64260.1, AT3G55260.1, AT5G03340.1, AT5G27600.1, AT4G33270.1, AT5G58420.1, AT5G23240.1, AT1G10760.1, AT1G79230.1, AT3G47520.1, AT3G26720.1, AT5G19740.1, AT1G14210.1, AT1G10430.1, AT3G14940.1, AT5G17920.1, AT5G57490.1, AT5G38470.1, AT1G05520.1, AT3G13870.1, AT3G13920.2, AT5G66840.1, AT4G31820.1, AT1G56340…	4.5e-76	8.5e-74	Cluster_4
GO:0005622	Cellular component	intracellular	213	27.0648	AT4G35410.2, AT4G37370.1, AT5G13110.1, AT1G35620.1, AT3G08590.1, AT3G55260.1, AT5G27600.1, AT5G58420.1, AT5G23240.1, AT1G10760.1, AT1G79230.1, AT3G47520.1, AT3G26720.1, AT5G19740.1, AT1G10430.1, AT3G14940.1, AT4G14570.1, AT5G57490.1, AT5G38470.1, AT1G05520.1, AT3G13870.1, AT3G13920.2, AT5G66840.1, AT4G31820.1, AT1G56340.1, AT5G16880.1, AT5G66680.1, AT3G56860.3, AT4G39080.1, AT3G56460.1, AT5G42150…	2.6e-28	9.9e-27	Cluster_4
GO:0044424	Cellular component	intracellular part	209	26.5565	AT4G35410.2, AT4G37370.1, AT5G13110.1, AT1G35620.1, AT3G08590.1, AT3G55260.1, AT5G27600.1, AT5G58420.1, AT5G23240.1, AT1G10760.1, AT1G79230.1, AT3G47520.1, AT3G26720.1, AT5G19740.1, AT1G10430.1, AT3G14940.1, AT4G14570.1, AT5G57490.1, AT5G38470.1, AT1G05520.1, AT3G13870.1, AT3G13920.2, AT5G66840.1, AT4G31820.1, AT1G56340.1, AT5G16880.1, AT5G66680.1, AT3G56860.3, AT4G39080.1, AT3G56460.1, AT5G42150…	7.8e-29	3.3e-27	Cluster_4
GO:0005737	Cellular component	cytoplasm	195	24.7776	AT4G35410.2, AT4G37370.1, AT5G13110.1, AT1G35620.1, AT3G08590.1, AT5G27600.1, AT5G58420.1, AT5G23240.1, AT1G10760.1, AT1G79230.1, AT3G47520.1, AT3G26720.1, AT5G19740.1, AT1G10430.1, AT3G14940.1, AT4G14570.1, AT5G57490.1, AT4G00570.1, AT1G05520.1, AT3G13870.1, AT3G13920.2, AT4G31820.1, AT1G56340.1, AT5G16880.1, AT5G66680.1, AT4G39080.1, AT3G56460.1, AT5G42150.1, AT5G16620.1, AT3G20390.1, AT3G48000…	8e-40	1e-37	Cluster_4
GO:0043229	Cellular component	intracellular organelle	182	23.1258	AT4G35410.2, AT4G37370.1, AT5G13110.1, AT1G35620.1, AT3G55260.1, AT5G27600.1, AT5G58420.1, AT5G23240.1, AT1G10760.1, AT1G79230.1, AT3G47520.1, AT3G26720.1, AT5G19740.1, AT1G10430.1, AT4G14570.1, AT5G57490.1, AT5G38470.1, AT1G05520.1, AT3G13870.1, AT4G31820.1, AT1G56340.1, AT5G16880.1, AT5G66680.1, AT3G56860.3, AT4G39080.1, AT3G56460.1, AT5G42150.1, AT5G44340.1, AT5G16620.1, AT3G20390.1, AT3G48000…	1.7e-23	4.7e-22	Cluster_4
GO:0043226	Cellular component	organelle	182	23.1258	AT4G35410.2, AT4G37370.1, AT5G13110.1, AT1G35620.1, AT3G55260.1, AT5G27600.1, AT5G58420.1, AT5G23240.1, AT1G10760.1, AT1G79230.1, AT3G47520.1, AT3G26720.1, AT5G19740.1, AT1G10430.1, AT4G14570.1, AT5G57490.1, AT5G38470.1, AT1G05520.1, AT3G13870.1, AT4G31820.1, AT1G56340.1, AT5G16880.1, AT5G66680.1, AT3G56860.3, AT4G39080.1, AT3G56460.1, AT5G42150.1, AT5G44340.1, AT5G16620.1, AT3G20390.1, AT3G48000…	1.9e-23	4.7e-22	Cluster_4
GO:0044444	Cellular component	cytoplasmic part	181	22.9987	AT4G35410.2, AT4G37370.1, AT5G13110.1, AT1G35620.1, AT3G08590.1, AT5G27600.1, AT5G58420.1, AT5G23240.1, AT1G10760.1, AT1G79230.1, AT3G47520.1, AT3G26720.1, AT5G19740.1, AT3G55260.1, AT3G14940.1, AT4G14570.1, AT5G57490.1, AT1G05520.1, AT3G13870.1, AT3G13920.2, AT4G31820.1, AT1G56340.1, AT5G16880.1, AT5G66680.1, AT4G39080.1, AT3G56460.1, AT5G42150.1, AT5G16620.1, AT3G20390.1, AT3G48000.1, AT1G13900…	3.8e-36	3.6e-34	Cluster_4
GO:0043231	Cellular component	intracellular membrane-bounded organelle	175	22.2363	AT4G35410.2, AT4G37370.1, AT5G13110.1, AT1G35620.1, AT3G55260.1, AT5G27600.1, AT5G58420.1, AT5G23240.1, AT1G10760.1, AT1G79230.1, AT3G47520.1, AT3G26720.1, AT5G19740.1, AT1G10430.1, AT4G14570.1, AT5G57490.1, AT5G38470.1, AT1G05520.1, AT3G13870.1, AT4G31820.1, AT1G56340.1, AT5G16880.1, AT5G66680.1, AT3G56860.3, AT4G39080.1, AT3G56460.1, AT5G54160.1, AT5G16620.1, AT3G20390.1, AT3G48000.1, AT1G13900…	1.4e-23	4.4e-22	Cluster_4
GO:0043227	Cellular component	membrane-bounded organelle	175	22.2363	AT4G35410.2, AT4G37370.1, AT5G13110.1, AT1G35620.1, AT3G55260.1, AT5G27600.1, AT5G58420.1, AT5G23240.1, AT1G10760.1, AT1G79230.1, AT3G47520.1, AT3G26720.1, AT5G19740.1, AT1G10430.1, AT4G14570.1, AT5G57490.1, AT5G38470.1, AT1G05520.1, AT3G13870.1, AT4G31820.1, AT1G56340.1, AT5G16880.1, AT5G66680.1, AT3G56860.3, AT4G39080.1, AT3G56460.1, AT5G54160.1, AT5G16620.1, AT3G20390.1, AT3G48000.1, AT1G13900…	1.6e-23	4.6e-22	Cluster_4
GO:0016020	Cellular component	membrane	82	10.4193	AT4G35410.2, AT4G26690.1, AT2G22170.1, AT1G78900.1, AT4G28390.1, AT5G53870.1, AT5G47530.1, AT2G26560.1, AT2G42800.1, AT4G00430.1, AT2G38410.1, AT2G05170.1, AT4G33270.1, AT5G58420.1, AT5G03700.1, AT3G02090.2, AT3G26720.1, AT4G20260.4, AT4G36195.1, AT5G57490.1, AT4G27270.1, AT1G73990.1, AT3G62360.1, AT1G15520.1, AT5G37510.2, AT3G18130.1, AT5G08680.1, AT1G52190.1, AT4G26910.1, AT1G65930.1, AT4G36760…	1.1e-06	1.2e-05	Cluster_4
GO:0044422	Cellular component	organelle part	61	7.75095	AT4G35410.2, AT3G06050.1, AT1G78900.1, AT1G23740.1, AT2G38410.1, AT2G05170.1, AT5G58420.1, AT5G51820.1, AT3G62600.1, AT3G02090.2, AT3G45300.1, AT2G17420.1, AT1G05190.1, AT2G19760.1, AT5G57490.1, AT3G29320.1, AT1G73990.1, AT3G04120.1, AT3G43520.1, AT5G08680.1, AT5G28060.1, AT5G16880.1, AT5G66680.1, AT4G39080.1, AT5G11710.1, AT4G34670.1, AT5G13440.1, AT5G44340.1, AT5G27770.1, AT5G64430.1, AT3G01280…	1.1e-35	6.9e-34	Cluster_4
GO:0044446	Cellular component	intracellular organelle part	61	7.75095	AT4G35410.2, AT3G06050.1, AT1G78900.1, AT1G23740.1, AT2G38410.1, AT2G05170.1, AT5G58420.1, AT5G51820.1, AT3G62600.1, AT3G02090.2, AT3G45300.1, AT2G17420.1, AT1G05190.1, AT2G19760.1, AT5G57490.1, AT3G29320.1, AT1G73990.1, AT3G04120.1, AT3G43520.1, AT5G08680.1, AT5G28060.1, AT5G16880.1, AT5G66680.1, AT4G39080.1, AT5G11710.1, AT4G34670.1, AT5G13440.1, AT5G44340.1, AT5G27770.1, AT5G64430.1, AT3G01280…	1.1e-35	6.9e-34	Cluster_4
GO:0005739	Cellular component	mitochondrion	59	7.49682	AT3G06050.1, AT2G13560.1, AT1G53240.1, AT4G00570.1, AT5G14590.1, AT1G65540.1, AT5G13440.1, AT1G10760.1, AT1G79230.1, AT3G02090.2, AT3G45300.1, AT4G34200.1, AT4G35090.1, AT2G44350.2, AT5G67590.1, AT3G61440.1, AT4G35260.1, AT1G77590.1, AT4G13850.1, AT3G04120.1, AT5G61790.1, AT4G32605.1, AT5G08680.1, AT5G07440.1, AT5G62530.1, AT4G26910.1, AT1G56340.1, AT2G05710.1, AT5G46180.1, AT5G42150.1, AT4G36400…	3.2e-35	1.8e-33	Cluster_4
GO:0009536	Cellular component	plastid	51	6.4803	AT2G22170.1, AT5G13110.1, AT2G13560.1, AT1G53240.1, AT1G79750.1, AT5G14590.1, AT5G55530.1, AT1G65540.1, AT3G47060.1, AT5G23240.1, AT5G51820.1, AT3G47520.1, AT4G14570.1, AT3G29320.1, AT1G77590.1, AT4G00570.1, AT3G43520.1, AT5G64430.1, AT2G05710.1, AT1G23740.1, AT5G16620.1, AT3G01280.1, AT3G48990.1, AT1G74960.2, AT3G09630.1, AT3G20390.1, AT4G35090.1, AT1G63940.2, AT3G13930.1, AT1G47840.1, AT5G23300…	0.0033	0.021	Cluster_4
GO:0005886	Cellular component	plasma membrane	46	5.84498	AT4G26690.1, AT5G53870.1, AT4G12730.1, AT2G38410.1, AT4G33270.1, AT1G74790.1, AT5G03700.1, AT3G26720.1, AT4G20260.4, AT4G27270.1, AT3G62360.1, AT1G15520.1, AT3G18130.1, AT4G36760.1, AT5G52450.1, AT5G16880.1, AT1G56140.1, AT2G05710.1, AT5G48380.1, AT3G53420.1, AT4G34670.1, AT1G65590.1, AT1G63500.1, AT5G27770.1, AT4G36195.1, AT3G60190.1, AT5G08580.1, AT1G12840.1, AT3G09630.1, AT2G37170.1, AT3G14920…	1.7e-17	3.3e-16	Cluster_4
GO:0032991	Cellular component	macromolecular complex	44	5.59085	AT4G35410.2, AT3G18130.1, AT4G26270.1, AT2G36060.2, AT4G33270.1, AT5G58420.1, AT2G05830.1, AT3G02090.2, AT1G05190.1, AT3G05530.1, AT3G12390.1, AT1G73990.1, AT3G11400.2, AT5G08680.1, AT5G28060.1, AT5G16620.1, AT5G66680.1, AT5G47810.1, AT5G19990.1, AT5G11710.1, AT4G34670.1, AT5G13440.1, AT5G44340.1, AT5G27770.1, AT5G08530.1, AT1G12840.1, AT3G09630.1, AT5G09900.3, AT3G14290.1, AT4G38630.1, AT1G09690…	1.4e-18	3e-17	Cluster_4
GO:0009507	Cellular component	chloroplast	43	5.46379	AT2G22170.1, AT5G13110.1, AT2G13560.1, AT1G53240.1, AT1G79750.1, AT5G14590.1, AT5G55530.1, AT3G47060.1, AT5G23240.1, AT5G51820.1, AT3G47520.1, AT4G14570.1, AT3G29320.1, AT1G77590.1, AT4G00570.1, AT3G43520.1, AT5G64430.1, AT2G05710.1, AT1G23740.1, AT5G16620.1, AT3G01280.1, AT3G09630.1, AT3G20390.1, AT1G13900.1, AT3G13930.1, AT1G47840.1, AT5G42650.1, AT2G47390.1, AT1G33590.1, AT3G09440.1, AT2G43180…	0.031	0.17	Cluster_4
GO:0005829	Cellular component	cytosol	39	4.95553	AT4G26270.1, AT2G19570.1, AT5G17920.1, AT3G13920.2, AT3G08590.1, AT1G64660.1, AT1G07890.3, AT5G58420.1, AT3G04120.1, AT2G17420.1, AT4G35160.1, AT5G40760.1, AT4G37870.1, AT5G28060.1, AT2G36310.1, AT1G08830.1, AT2G38280.1, AT1G59900.1, AT5G54160.1, AT4G34670.1, AT5G27770.1, AT3G09630.1, AT5G37600.1, AT1G09690.1, AT4G38630.1, AT1G16270.1, AT3G14940.1, AT5G47810.1, AT2G29960.1, AT3G46970.1, AT4G16720…	1.4e-13	2.3e-12	Cluster_4
GO:0005634	Cellular component	nucleus	37	4.7014	AT1G09570.1, AT5G66840.1, AT4G38630.1, AT5G58420.1, AT1G29660.1, AT5G63980.1, AT5G56600.1, AT1G18800.1, AT3G46000.1, AT3G05530.1, AT2G29570.1, AT5G59090.1, AT4G37870.1, AT1G10430.1, AT2G38280.1, AT5G19990.1, AT1G59900.1, AT5G54160.1, AT4G34670.1, AT3G56860.3, AT5G27770.1, AT2G19760.1, AT1G27970.2, AT3G09630.1, AT5G09900.3, AT2G42810.2, AT1G16270.1, AT2G35840.1, AT2G19770.1, AT5G38470.1, AT2G20580…	2.1e-27	7.1e-26	Cluster_4
GO:0030312	Cellular component	external encapsulating structure	33	4.19314	AT2G39700.1, AT1G53240.1, AT1G17860.1, AT5G03340.1, AT5G20950.1, AT3G26720.1, AT3G05610.1, AT2G19760.1, AT4G36195.1, AT3G62360.1, AT5G17770.1, AT5G28060.1, AT5G66680.1, AT3G26380.1, AT2G05710.1, AT2G02850.1, AT4G34670.1, AT3G14310.1, AT3G09630.1, AT3G14920.1, AT1G71380.1, AT1G35620.1, AT5G64260.1, AT1G33590.1, AT3G09440.1, AT1G21680.1, AT1G78830.1, AT5G06860.1, AT5G61790.1, AT1G62440.1, AT5G12950…	3.1e-16	5.6e-15	Cluster_4
GO:0043234	Cellular component	protein complex	32	4.06607	AT4G35410.2, AT3G18130.1, AT4G26270.1, AT2G36060.2, AT4G33270.1, AT2G05830.1, AT3G02090.2, AT3G05530.1, AT1G73990.1, AT3G11400.2, AT5G08680.1, AT5G16620.1, AT5G66680.1, AT5G47810.1, AT5G19990.1, AT5G11710.1, AT5G13440.1, AT5G44340.1, AT5G08530.1, AT1G12840.1, AT5G09900.3, AT3G14290.1, AT4G38630.1, AT5G66760.1, AT2G20580.1, AT4G29040.1, AT5G37510.2, AT1G16470.1, AT5G67590.1, AT1G05520.1, AT4G23570…	2.3e-17	4.3e-16	Cluster_4
GO:0005618	Cellular component	cell wall	32	4.06607	AT2G39700.1, AT1G53240.1, AT5G03340.1, AT5G20950.1, AT3G26720.1, AT3G05610.1, AT2G19760.1, AT4G36195.1, AT3G62360.1, AT5G17770.1, AT5G28060.1, AT5G66680.1, AT3G26380.1, AT2G05710.1, AT1G17860.1, AT4G34670.1, AT3G14310.1, AT3G09630.1, AT3G14920.1, AT1G71380.1, AT1G35620.1, AT5G64260.1, AT1G33590.1, AT3G09440.1, AT1G21680.1, AT1G78830.1, AT5G06860.1, AT5G61790.1, AT1G62440.1, AT5G12950.1, AT1G11580…	1.5e-15	2.6e-14	Cluster_4
GO:0005773	Cellular component	vacuole	25	3.17662	AT1G78900.1, AT1G78230.1, AT3G26720.1, AT5G19740.1, AT3G55260.1, AT4G14570.1, AT3G05500.1, AT2G05170.1, AT1G11910.1, AT4G29680.1, AT1G21750.1, AT1G02305.1, AT4G39080.1, AT4G36195.1, AT1G12840.1, AT3G09630.1, AT3G20390.1, AT3G14920.1, AT5G15350.1, AT3G09440.1, AT1G21680.1, AT5G43060.1, AT5G12950.1, AT1G09010.1, AT1G15690.1	8.8e-30	4.2e-28	Cluster_4
GO:0044425	Cellular component	membrane part	25	3.17662	AT4G35410.2, AT4G26690.1, AT4G12730.1, AT5G65980.1, AT1G74790.1, AT3G02090.2, AT1G73990.1, AT2G42800.1, AT3G18130.1, AT5G08680.1, AT5G53870.1, AT5G16620.1, AT5G66680.1, AT5G55730.1, AT5G13440.1, AT5G08530.1, AT1G12840.1, AT2G42810.2, AT5G15350.1, AT4G33270.1, AT5G66760.1, AT5G37510.2, AT5G67590.1, AT1G05520.1, AT5G53560.1	1.6e-10	2.5e-09	Cluster_4
GO:0031975	Cellular component	envelope	22	2.79543	AT1G23740.1, AT5G51820.1, AT3G02090.2, AT5G57490.1, AT3G04120.1, AT3G43520.1, AT5G08680.1, AT5G16620.1, AT5G13440.1, AT5G64430.1, AT3G01280.1, AT1G27970.2, AT4G35090.1, AT1G63940.2, AT3G13930.1, AT2G42810.2, AT3G47520.1, AT5G66760.1, AT5G37510.2, AT3G06720.1, AT2G28900.1, AT4G28390.1	4.6e-20	1e-18	Cluster_4
GO:0031967	Cellular component	organelle envelope	22	2.79543	AT1G23740.1, AT5G51820.1, AT3G02090.2, AT5G57490.1, AT3G04120.1, AT3G43520.1, AT5G08680.1, AT5G16620.1, AT5G13440.1, AT5G64430.1, AT3G01280.1, AT1G27970.2, AT4G35090.1, AT1G63940.2, AT3G13930.1, AT2G42810.2, AT3G47520.1, AT5G66760.1, AT5G37510.2, AT3G06720.1, AT2G28900.1, AT4G28390.1	4.6e-20	1e-18	Cluster_4
GO:0031090	Cellular component	organelle membrane	21	2.66836	AT4G35410.2, AT5G13440.1, AT1G78900.1, AT5G57490.1, AT3G01280.1, AT2G05170.1, AT5G66760.1, AT1G73990.1, AT1G12840.1, AT4G28390.1, AT1G05520.1, AT5G08680.1, AT2G28900.1, AT5G37510.2, AT5G53560.1, AT5G16620.1, AT5G66680.1, AT2G42810.2, AT3G02090.2, AT4G39080.1, AT1G15690.1	0.00042	0.0029	Cluster_4
GO:0009505	Cellular component	plant-type cell wall	20	2.5413	AT5G06860.1, AT5G61790.1, AT4G36195.1, AT2G39700.1, AT1G62440.1, AT3G62360.1, AT5G64260.1, AT5G12950.1, AT3G14920.1, AT1G33590.1, AT1G71380.1, AT5G17770.1, AT1G35620.1, AT1G11580.1, AT5G66680.1, AT5G20950.1, AT3G26720.1, AT3G05610.1, AT1G21680.1, AT1G78830.1	2.1e-10	2.9e-09	Cluster_4
GO:0005783	Cellular component	endoplasmic reticulum	19	2.41423	AT4G37370.1, AT5G61790.1, AT2G29960.1, AT3G54960.1, AT1G35620.1, AT1G76400.1, AT1G44170.1, AT3G62360.1, AT3G12120.1, AT1G23010.1, AT1G21750.1, AT5G17770.1, AT1G56340.1, AT5G66680.1, AT2G42810.2, AT3G62600.1, AT3G13870.1, AT5G53560.1, AT5G60640.1	1.2e-06	1.2e-05	Cluster_4
GO:0043232	Cellular component	intracellular non-membrane-bounded organelle	18	2.28717	AT1G05190.1, AT2G19760.1, AT5G44340.1, AT5G27770.1, AT3G12390.1, AT5G56600.1, AT2G19770.1, AT3G09630.1, AT4G34670.1, AT3G55280.1, AT5G58420.1, AT5G47700.1, AT5G28060.1, AT2G33040.1, AT1G09690.1, AT3G09440.1, AT4G16720.1, AT5G11710.1	0.047	0.25	Cluster_4
GO:0043228	Cellular component	non-membrane-bounded organelle	18	2.28717	AT1G05190.1, AT2G19760.1, AT5G44340.1, AT5G27770.1, AT3G12390.1, AT5G56600.1, AT2G19770.1, AT3G09630.1, AT4G34670.1, AT3G55280.1, AT5G58420.1, AT5G47700.1, AT5G28060.1, AT2G33040.1, AT1G09690.1, AT3G09440.1, AT4G16720.1, AT5G11710.1	0.047	0.25	Cluster_4
GO:0044435	Cellular component	plastid part	17	2.1601	AT1G23740.1, AT3G13930.1, AT5G64430.1, AT3G47520.1, AT3G29320.1, AT1G60950.1, AT2G47390.1, AT3G43520.1, AT4G35090.1, AT1G63940.2, AT2G28900.1, AT5G13420.1, AT5G51820.1, AT5G42650.1, AT1G73990.1, AT4G09020.1, AT5G16620.1	0.023	0.13	Cluster_4
GO:0070013	Cellular component	intracellular organelle lumen	14	1.77891	AT4G34670.1, AT2G19760.1, AT3G06050.1, AT2G17420.1, AT3G09630.1, AT1G79440.1, AT1G09570.1, AT5G58420.1, AT5G27770.1, AT3G02090.2, AT2G33040.1, AT3G62600.1, AT3G45300.1, AT3G52880.2	0.0038	0.023	Cluster_4
GO:0043233	Cellular component	organelle lumen	14	1.77891	AT4G34670.1, AT2G19760.1, AT3G06050.1, AT2G17420.1, AT3G09630.1, AT1G79440.1, AT1G09570.1, AT5G58420.1, AT5G27770.1, AT3G02090.2, AT2G33040.1, AT3G62600.1, AT3G45300.1, AT3G52880.2	0.0038	0.023	Cluster_4
GO:0031974	Cellular component	membrane-enclosed lumen	14	1.77891	AT4G34670.1, AT2G19760.1, AT3G06050.1, AT2G17420.1, AT3G09630.1, AT1G79440.1, AT1G09570.1, AT5G58420.1, AT5G27770.1, AT3G02090.2, AT2G33040.1, AT3G62600.1, AT3G45300.1, AT3G52880.2	0.0041	0.025	Cluster_4
GO:0044429	Cellular component	mitochondrial part	13	1.65184	AT5G13440.1, AT3G06050.1, AT2G17420.1, AT3G01280.1, AT5G57490.1, AT5G66760.1, AT3G04120.1, AT1G79440.1, AT5G08680.1, AT4G28390.1, AT5G37510.2, AT3G02090.2, AT3G45300.1	9.7e-12	1.5e-10	Cluster_4
GO:0005576	Cellular component	extracellular region	13	1.65184	AT1G23740.1, AT3G48990.1, AT5G59090.1, AT3G08590.1, AT1G17860.1, AT5G67360.1, AT1G65930.1, AT4G20840.1, AT1G29660.1, AT2G02850.1, AT3G09440.1, AT2G02990.1, AT1G78830.1	8.1e-05	0.00063	Cluster_4
GO:0005840	Cellular component	ribosome	12	1.52478	AT1G05190.1, AT4G34670.1, AT5G27770.1, AT3G12390.1, AT4G16720.1, AT3G09630.1, AT3G55280.1, AT5G58420.1, AT5G28060.1, AT1G09690.1, AT3G09440.1, AT5G47700.1	0.016	0.089	Cluster_4
GO:0022626	Cellular component	cytosolic ribosome	11	1.39771	AT4G34670.1, AT5G27770.1, AT3G12390.1, AT4G16720.1, AT3G09630.1, AT3G55280.1, AT5G58420.1, AT5G28060.1, AT1G09690.1, AT3G09440.1, AT5G47700.1	4.6e-09	5.8e-08	Cluster_4
GO:0044445	Cellular component	cytosolic part	11	1.39771	AT4G34670.1, AT4G26270.1, AT5G27770.1, AT5G47810.1, AT4G16720.1, AT3G09630.1, AT3G55280.1, AT5G58420.1, AT5G28060.1, AT1G09690.1, AT2G22480.1	7.1e-09	8.7e-08	Cluster_4
GO:0009526	Cellular component	plastid envelope	10	1.27065	AT1G23740.1, AT5G64430.1, AT3G43520.1, AT4G35090.1, AT1G63940.2, AT2G28900.1, AT3G13930.1, AT5G51820.1, AT5G16620.1, AT3G47520.1	1.1e-09	1.5e-08	Cluster_4
GO:0048046	Cellular component	apoplast	10	1.27065	AT1G23740.1, AT3G48990.1, AT5G59090.1, AT3G08590.1, AT1G65930.1, AT4G20840.1, AT1G29660.1, AT1G78830.1, AT3G09440.1, AT1G17860.1	0.0002	0.0015	Cluster_4
GO:0005777	Cellular component	peroxisome	9	1.14358	AT1G06290.1, AT1G20510.1, AT4G35090.1, AT5G27600.1, AT3G58750.1, AT5G43280.1, AT4G09320.1, AT3G56460.1, AT3G52880.2	2.1e-10	2.9e-09	Cluster_4
GO:0042579	Cellular component	microbody	9	1.14358	AT1G06290.1, AT1G20510.1, AT4G35090.1, AT5G27600.1, AT3G58750.1, AT5G43280.1, AT4G09320.1, AT3G56460.1, AT3G52880.2	2.1e-10	2.9e-09	Cluster_4
GO:0005740	Cellular component	mitochondrial envelope	9	1.14358	AT5G13440.1, AT3G01280.1, AT5G57490.1, AT5G66760.1, AT3G04120.1, AT4G28390.1, AT5G08680.1, AT5G37510.2, AT3G02090.2	3.6e-08	4.2e-07	Cluster_4
GO:0033279	Cellular component	ribosomal subunit	9	1.14358	AT1G05190.1, AT4G34670.1, AT5G27770.1, AT4G16720.1, AT3G09630.1, AT3G55280.1, AT5G58420.1, AT5G28060.1, AT1G09690.1	1.4e-05	0.00012	Cluster_4
GO:0031966	Cellular component	mitochondrial membrane	8	1.01652	AT5G13440.1, AT3G01280.1, AT5G57490.1, AT5G66760.1, AT4G28390.1, AT5G08680.1, AT5G37510.2, AT3G02090.2	2e-07	2.3e-06	Cluster_4
GO:0000502	Cellular component	proteasome complex	8	1.01652	AT3G05530.1, AT5G09900.3, AT2G20580.1, AT4G29040.1, AT1G16470.1, AT4G38630.1, AT3G14290.1, AT5G19990.1	1.1e-06	1.2e-05	Cluster_4
GO:0005794	Cellular component	Golgi apparatus	7	0.889454	AT4G35410.2, AT2G29960.1, AT1G05520.1, AT2G38410.1, AT5G16880.1, AT1G30620.1, AT5G11710.1	7.9e-06	7.2e-05	Cluster_4
GO:0031981	Cellular component	nuclear lumen	7	0.889454	AT4G34670.1, AT2G19760.1, AT1G09570.1, AT5G27770.1, AT3G09630.1, AT5G58420.1, AT2G33040.1	7e-05	0.00055	Cluster_4
GO:0022624	Cellular component	proteasome accessory complex	6	0.762389	AT3G05530.1, AT2G20580.1, AT5G09900.3, AT4G29040.1, AT4G38630.1, AT5G19990.1	3.9e-06	3.8e-05	Cluster_4
GO:0005838	Cellular component	proteasome regulatory particle	6	0.762389	AT3G05530.1, AT2G20580.1, AT5G09900.3, AT4G29040.1, AT4G38630.1, AT5G19990.1	3.9e-06	3.8e-05	Cluster_4
GO:0019866	Cellular component	organelle inner membrane	6	0.762389	AT5G13440.1, AT5G66760.1, AT5G08680.1, AT4G28390.1, AT5G16620.1, AT3G02090.2	6.8e-06	6.4e-05	Cluster_4
GO:0009570	Cellular component	chloroplast stroma	6	0.762389	AT1G23740.1, AT5G13420.1, AT1G60950.1, AT3G29320.1, AT5G51820.1, AT2G47390.1	9.5e-06	8.4e-05	Cluster_4
GO:0015934	Cellular component	large ribosomal subunit	6	0.762389	AT1G05190.1, AT5G27770.1, AT4G16720.1, AT3G09630.1, AT1G09690.1, AT3G55280.1	4.4e-05	0.00037	Cluster_4
GO:0005730	Cellular component	nucleolus	6	0.762389	AT4G34670.1, AT2G19760.1, AT5G27770.1, AT3G09630.1, AT5G58420.1, AT2G33040.1	6.3e-05	0.00051	Cluster_4
GO:0009532	Cellular component	plastid stroma	6	0.762389	AT1G23740.1, AT5G13420.1, AT1G60950.1, AT3G29320.1, AT5G51820.1, AT2G47390.1	0.00027	0.0019	Cluster_4
GO:0070469	Cellular component	respiratory chain	6	0.762389	AT5G13440.1, AT5G08530.1, AT5G66760.1, AT5G37510.2, AT5G67590.1, AT3G02090.2	0.0022	0.014	Cluster_4
GO:0008540	Cellular component	proteasome regulatory particle, base subcomplex	5	0.635324	AT4G38630.1, AT4G29040.1, AT3G05530.1, AT2G20580.1, AT5G19990.1	7.9e-07	8.8e-06	Cluster_4
GO:0022625	Cellular component	cytosolic large ribosomal subunit	5	0.635324	AT1G09690.1, AT4G16720.1, AT3G09630.1, AT5G27770.1, AT3G55280.1	7.4e-06	6.9e-05	Cluster_4
GO:0005743	Cellular component	mitochondrial inner membrane	5	0.635324	AT5G66760.1, AT3G02090.2, AT5G13440.1, AT4G28390.1, AT5G08680.1	5.5e-05	0.00046	Cluster_4
GO:0009941	Cellular component	chloroplast envelope	5	0.635324	AT1G23740.1, AT3G13930.1, AT3G43520.1, AT5G64430.1, AT5G16620.1	0.00015	0.0012	Cluster_4
GO:0005856	Cellular component	cytoskeleton	5	0.635324	AT2G19760.1, AT2G19770.1, AT5G56600.1, AT5G44340.1, AT5G11710.1	0.00028	0.002	Cluster_4
GO:0031980	Cellular component	mitochondrial lumen	5	0.635324	AT3G02090.2, AT3G06050.1, AT3G45300.1, AT2G17420.1, AT1G79440.1	0.00067	0.0046	Cluster_4
GO:0005759	Cellular component	mitochondrial matrix	5	0.635324	AT3G02090.2, AT3G06050.1, AT3G45300.1, AT2G17420.1, AT1G79440.1	0.00067	0.0046	Cluster_4
GO:0009579	Cellular component	thylakoid	5	0.635324	AT1G73990.1, AT2G22170.1, AT3G20390.1, AT1G23740.1, AT5G11710.1	0.001	0.0068	Cluster_4
GO:0005768	Cellular component	endosome	5	0.635324	AT4G31820.1, AT2G27600.1, AT2G29960.1, AT1G09630.1, AT1G15690.1	0.0013	0.0085	Cluster_4
GO:0005774	Cellular component	vacuolar membrane	5	0.635324	AT1G12840.1, AT1G78900.1, AT4G39080.1, AT2G05170.1, AT1G15690.1	0.0051	0.03	Cluster_4
GO:0044437	Cellular component	vacuolar part	5	0.635324	AT1G12840.1, AT1G78900.1, AT4G39080.1, AT2G05170.1, AT1G15690.1	0.0059	0.035	Cluster_4
GO:0044431	Cellular component	Golgi apparatus part	5	0.635324	AT4G35410.2, AT1G05520.1, AT2G29960.1, AT5G16880.1, AT2G38410.1	0.0079	0.045	Cluster_4

## Sheet: Cat. activity cluster 1
Table 3. Metabolism overview of proteins related to catalytic activity (GO:0003824) in cluster 1 using MapMan software
Ginseng ID	BinName	[TAIR10]	[TAIR10] Description	MapMan description	Cluster
Pg_S1957.32	amino acid metabolism.degradation.aromatic aa.tryptophan	at3g24360.1	AT3G24360.1 | Symbols: | ATP-dependent caseinolytic (Clp) protease/crotonase family protein | chr3:8839832-8842799 REVERSE LENGTH=418	enoyl-CoA hydratase/isomerase family protein | chr3:8839728-8842831 REVERSE	1
Pg_S7119.3	amino acid metabolism.degradation.histidine	at1g43710.1	AT1G43710.1 | Symbols: emb1075 | Pyridoxal phosphate (PLP)-dependent transferases superfamily protein | chr1:16486534-16488298 REVERSE LENGTH=482	Symbols: emb1075 | emb1075 (embryo defective 1075); carboxy-lyase/ catalytic/ pyridoxal phosphate binding | chr1:16486320-16488384 REVERSE	1
Pg_S3518.16	amino acid metabolism.synthesis.aspartate family.methionine	at2g36880.1	AT2G36880.1 | Symbols: MAT3 | methionine adenosyltransferase 3 | chr2:15479721-15480893 REVERSE LENGTH=390	Symbols: MAT3 | MAT3 (methionine adenosyltransferase 3); copper ion binding / methionine adenosyltransferase | chr2:15479366-15481412 REVERSE	1
Pg_S8437.3	amino acid metabolism.synthesis.aspartate family.methionine.methionine synthase	at3g03780.1	AT3G03780.1 | Symbols: ATMS2, MS2 | methionine synthase 2 | chr3:957602-960740 FORWARD LENGTH=765	Symbols: ATMS2 | AtMS2; 5-methyltetrahydropteroyltriglutamate-homocysteine S-methyltransferase/ methionine synthase | chr3:957235-960980 FORWARD	1
Pg_S1400.29	amino acid metabolism.synthesis.aspartate family.methionine.S-adenosylmethionine synthetase	at1g02500.1	AT1G02500.1 | Symbols: SAM1, SAM-1, MAT1, AtSAM1 | S-adenosylmethionine synthetase 1 | chr1:519037-520218 FORWARD LENGTH=393	Symbols: SAM1, SAM-1, MAT1 | SAM1 (S-ADENOSYLMETHIONINE SYNTHETASE 1); methionine adenosyltransferase | chr1:518251-520437 FORWARD	1
Pg_S8941.1	amino acid metabolism.synthesis.aspartate family.methionine.S-adenosylmethionine synthetase	at4g01850.1	AT4G01850.1 | Symbols: SAM-2, MAT2, SAM2, AtSAM2 | S-adenosylmethionine synthetase 2 | chr4:796298-797479 REVERSE LENGTH=393	Symbols: SAM-2, MAT2 | SAM-2 (S-ADENOSYLMETHIONINE SYNTHETASE 2); copper ion binding / methionine adenosyltransferase | chr4:796097-798286 REVERSE	1
Pg_S1590.6	amino acid metabolism.synthesis.central amino acid metabolism.aspartate.aspartate aminotransferase	at2g30970.1	AT2G30970.1 | Symbols: ASP1 | aspartate aminotransferase 1 | chr2:13179012-13181686 FORWARD LENGTH=430	Symbols: ASP1 | ASP1 (ASPARTATE AMINOTRANSFERASE 1); L-aspartate:2-oxoglutarate aminotransferase | chr2:13178849-13181931 FORWARD	1
Pg_S5838.4	C1-metabolism.glycine hydroxymethyltransferase	at4g13930.1	AT4G13930.1 | Symbols: SHM4 | serine hydroxymethyltransferase 4 | chr4:8048013-8050021 REVERSE LENGTH=471	Symbols: SHM4 | SHM4 (serine hydroxymethyltransferase 4); catalytic/ glycine hydroxymethyltransferase/ pyridoxal phosphate binding | chr4:8047692-8050106 REVERSE	1
Pg_S6424.1	C1-metabolism.glycine hydroxymethyltransferase	at5g26780.3	AT5G26780.3 | Symbols: SHM2 | serine hydroxymethyltransferase 2 | chr5:9418299-9421725 FORWARD LENGTH=533	Symbols: SHM2 | SHM2 (SERINE HYDROXYMETHYLTRANSFERASE 2); catalytic/ glycine hydroxymethyltransferase/ pyridoxal phosphate binding | chr5:9418195-9422091 FORWARD	1
Pg_S2579.3	cell wall.cellulose synthesis	at5g49720.1	AT5G49720.1 | Symbols: ATGH9A1, TSD1, DEC, KOR, RSW2, IRX2, KOR1, GH9A1 | glycosyl hydrolase 9A1 | chr5:20197765-20200168 REVERSE LENGTH=621	Symbols: ATGH9A1, DEC, KOR, RSW2, IRX2, KOR1 | ATGH9A1 (ARABIDOPSIS THALIANA GLYCOSYL HYDROLASE 9A1); cellulase/ hydrolase, hydrolyzing O-glycosyl compounds | chr5:20197391-20200288 REVERSE	1
Pg_S2757.6	cell wall.cellulose synthesis.cellulose synthase	at4g32410.1	AT4G32410.1 | Symbols: CESA1, RSW1, AtCESA1 | cellulose synthase 1 | chr4:15641009-15646388 REVERSE LENGTH=1081	Symbols: CESA1, RSW1 | CESA1 (CELLULOSE SYNTHASE 1); cellulose synthase/ transferase, transferring glycosyl groups | chr4:15640620-15646665 REVERSE	1
Pg_S8353.1	cell wall.degradation.mannan-xylose-arabinose-fucose	at5g64570.1	AT5G64570.1 | Symbols: XYL4, ATBXL4 | beta-D-xylosidase 4 | chr5:25810227-25813309 REVERSE LENGTH=784	Symbols: XYL4, ATBXL4 | XYL4; hydrolase, hydrolyzing O-glycosyl compounds / xylan 1,4-beta-xylosidase | chr5:25810115-25813335 REVERSE	1
Pg_S1777.2	cell wall.pectin*esterases.acetyl esterase	at3g05910.1	AT3G05910.1 | Symbols: | Pectinacetylesterase family protein | chr3:1764509-1767240 REVERSE LENGTH=415	pectinacetylesterase, putative | chr3:1764294-1767575 REVERSE	1
Pg_S5954.7	cell wall.pectin*esterases.misc	at5g53370.1	AT5G53370.1 | Symbols: ATPMEPCRF, PMEPCRF | pectin methylesterase PCR fragment F | chr5:21649683-21651530 REVERSE LENGTH=587	Symbols: ATPMEPCRF, PMEPCRF | PMEPCRF (PECTIN METHYLESTERASE PCR FRAGMENT F); pectinesterase | chr5:21649532-21651593 REVERSE	1
Pg_S2274.6	cell wall.precursor synthesis	at1g31070.2	AT1G31070.2 | Symbols: GlcNAc1pUT1 | N-acetylglucosamine-1-phosphate uridylyltransferase 1 | chr1:11084951-11088361 FORWARD LENGTH=505	UDP-N-acetylglucosamine pyrophosphorylase-related | chr1:11084859-11088563 FORWARD	1
Pg_S2744.3	cell wall.precursor synthesis.AXS	at1g08200.1	AT1G08200.1 | Symbols: AXS2 | UDP-D-apiose/UDP-D-xylose synthase 2 | chr1:2574259-2576609 REVERSE LENGTH=389	Symbols: AXS2 | AXS2 (UDP-D-APIOSE/UDP-D-XYLOSE SYNTHASE 2); UDP-glucuronate decarboxylase | chr1:2573848-2576714 REVERSE	1
Pg_S4460.5	cell wall.precursor synthesis.MUR4	at1g30620.1	AT1G30620.1 | Symbols: HSR8, MUR4, UXE1 | NAD(P)-binding Rossmann-fold superfamily protein | chr1:10855496-10857970 FORWARD LENGTH=419	Symbols: HSR8, MUR4, UXE1 | MUR4 (MURUS 4); UDP-arabinose 4-epimerase/ catalytic | chr1:10854549-10858244 FORWARD	1
Pg_S4885.2	cell wall.precursor synthesis.UER	at1g63000.1	AT1G63000.1 | Symbols: NRS/ER, UER1 | nucleotide-rhamnose synthase/epimerase-reductase | chr1:23342510-23343859 FORWARD LENGTH=301	Symbols: NRS/ER, UER1 | NRS/ER (NUCLEOTIDE-RHAMNOSE SYNTHASE/EPIMERASE-REDUCTASE); UDP-4-keto-6-deoxy-glucose-3,5-epimerase/ UDP-4-keto-rhamnose-4-keto-reductase/ dTDP-4-dehydrorhamnose 3,5-epimerase/ dTDP-4-dehydrorhamnose reductase | chr1:23342393-23344113 FORWARD	1
Pg_S1242.6	cell wall.precursor synthesis.UGD	at5g15490.1	AT5G15490.1 | Symbols: | UDP-glucose 6-dehydrogenase family protein | chr5:5027872-5029314 REVERSE LENGTH=480	UDP-glucose 6-dehydrogenase, putative | chr5:5027639-5030194 REVERSE	1
Pg_S4588.10	cell wall.precursor synthesis.UXS	at3g46440.1	AT3G46440.1 | Symbols: UXS5 | UDP-XYL synthase 5 | chr3:17089268-17091611 REVERSE LENGTH=341	Symbols: UXS5 | UXS5; UDP-glucuronate decarboxylase/ catalytic | chr3:17089045-17091875 REVERSE	1
Pg_S2350.4	glycolysis.cytosolic branch.pyrophosphate-fructose-6-P phosphotransferase	at1g12000.1	AT1G12000.1 | Symbols: | Phosphofructokinase family protein | chr1:4050159-4053727 REVERSE LENGTH=566	pyrophosphate--fructose-6-phosphate 1-phosphotransferase beta subunit, putative / pyrophosphate-dependent 6-phosphofructose-1-kinase, putative | chr1:4049896-4053835 REVERSE	1
Pg_S0762.36	lipid metabolism.''exotics'' (steroids, squalene etc).cycloartenol synthase	at2g07050.1	AT2G07050.1 | Symbols: CAS1 | cycloartenol synthase 1 | chr2:2924629-2930295 FORWARD LENGTH=759	Symbols: CAS1 | CAS1 (cycloartenol synthase 1); cycloartenol synthase | chr2:2924447-2930672 FORWARD	1
Pg_S3967.1	lipid metabolism.FA synthesis and FA elongation.beta ketoacyl CoA synthase	at5g04530.1	AT5G04530.1 | Symbols: KCS19 | 3-ketoacyl-CoA synthase 19 | chr5:1292222-1293616 REVERSE LENGTH=464	Symbols: KCS19 | KCS19 (3-KETOACYL-COA SYNTHASE 19); acyltransferase/ catalytic/ transferase, transferring acyl groups other than amino-acyl groups | chr5:1291822-1293688 REVERSE	1
Pg_S1957.32	lipid metabolism.lipid degradation.beta-oxidation.enoyl CoA hydratase	at3g24360.1	AT3G24360.1 | Symbols: | ATP-dependent caseinolytic (Clp) protease/crotonase family protein | chr3:8839832-8842799 REVERSE LENGTH=418	enoyl-CoA hydratase/isomerase family protein | chr3:8839728-8842831 REVERSE	1
Pg_S2093.20	lipid metabolism.lipid degradation.lipases.triacylglycerol lipase	at4g16820.1	AT4G16820.1 | Symbols: PLA-I{beta]2 | alpha/beta-Hydrolases superfamily protein | chr4:9467563-9469116 FORWARD LENGTH=517	lipase class 3 family protein | chr4:9467563-9469116 FORWARD	1
Pg_S1273.1	lipid metabolism.lipid degradation.lysophospholipases.phospholipase D	at1g52570.1	AT1G52570.1 | Symbols: PLDALPHA2 | phospholipase D alpha 2 | chr1:19583940-19586551 REVERSE LENGTH=810	Symbols: PLDALPHA2 | PLDALPHA2 (phosphlipase d alpha 2); phospholipase D | chr1:19583940-19586551 REVERSE	1
Pg_S3584.22	lipid metabolism.lipid degradation.lysophospholipases.phospholipase D	at4g35790.1	AT4G35790.1 | Symbols: ATPLDDELTA, PLDDELTA | phospholipase D delta | chr4:16955774-16959875 REVERSE LENGTH=868	Symbols: ATPLDDELTA, PLDDELTA | ATPLDDELTA; phospholipase D | chr4:16955518-16960170 REVERSE	1
Pg_S6190.8	lipid metabolism.Phospholipid synthesis	at1g73600.2	AT1G73600.2 | Symbols: | S-adenosyl-L-methionine-dependent methyltransferases superfamily protein | chr1:27669224-27673400 FORWARD LENGTH=504	methyltransferase/ phosphoethanolamine N-methyltransferase | chr1:27669152-27673572 FORWARD	1
Pg_S1769.27	lipid metabolism.Phospholipid synthesis.1-acylglycerol-3-phosphate O-acyltransferase	at3g57650.1	AT3G57650.1 | Symbols: LPAT2 | lysophosphatidyl acyltransferase 2 | chr3:21349751-21352839 FORWARD LENGTH=389	Symbols: LPAT2 | LPAT2; 1-acylglycerol-3-phosphate O-acyltransferase | chr3:21349507-21353174 FORWARD	1
Pg_S0472.6	lipid metabolism.Phospholipid synthesis.diacylglycerol kinase	at4g30340.1	AT4G30340.1 | Symbols: ATDGK7, DGK7 | diacylglycerol kinase 7 | chr4:14838465-14840941 REVERSE LENGTH=492	Symbols: ATDGK7 | ATDGK7 (Diacylglycerol kinase 7); diacylglycerol kinase | chr4:14838291-14841067 REVERSE	1
Pg_S0222.3	major CHO metabolism.degradation.sucrose.hexokinase	at2g19860.1	AT2G19860.1 | Symbols: ATHXK2, HXK2 | hexokinase 2 | chr2:8570818-8573762 FORWARD LENGTH=502	Symbols: ATHXK2, HXK2 | HXK2 (HEXOKINASE 2); ATP binding / fructokinase/ glucokinase/ hexokinase | chr2:8570750-8574000 FORWARD	1
Pg_S3876.17	major CHO metabolism.degradation.sucrose.invertases.vacuolar	at1g12240.1	AT1G12240.1 | Symbols: ATBETAFRUCT4, VAC-INV | Glycosyl hydrolases family 32 protein | chr1:4153699-4157457 FORWARD LENGTH=664	Symbols: ATBETAFRUCT4, VAC-INV | ATBETAFRUCT4; beta-fructofuranosidase/ hydrolase, hydrolyzing O-glycosyl compounds | chr1:4153652-4157644 FORWARD	1
Pg_S5964.5	major CHO metabolism.degradation.sucrose.Susy	at1g73370.1	AT1G73370.1 | Symbols: SUS6, ATSUS6 | sucrose synthase 6 | chr1:27584533-27588326 REVERSE LENGTH=942	Symbols: SUS6, ATSUS6 | SUS6 (SUCROSE SYNTHASE 6); UDP-glycosyltransferase/ sucrose synthase | chr1:27584479-27588326 REVERSE	1
Pg_S5422.1	major CHO metabolism.degradation.sucrose.Susy	at3g43190.1	AT3G43190.1 | Symbols: SUS4, ATSUS4 | sucrose synthase 4 | chr3:15179204-15182577 REVERSE LENGTH=808	Symbols: SUS4, ATSUS4 | SUS4; UDP-glycosyltransferase/ sucrose synthase/ transferase, transferring glycosyl groups | chr3:15179020-15183989 REVERSE	1
Pg_S3338.6	major CHO metabolism.synthesis.starch.AGPase	at1g74910.1	AT1G74910.1 | Symbols: | ADP-glucose pyrophosphorylase family protein | chr1:28135770-28138456 REVERSE LENGTH=415	ADP-glucose pyrophosphorylase family protein | chr1:28135361-28138768 REVERSE	1
Pg_S0953.13	major CHO metabolism.synthesis.starch.AGPase	at4g39210.1	AT4G39210.1 | Symbols: APL3 | Glucose-1-phosphate adenylyltransferase family protein | chr4:18260332-18263181 FORWARD LENGTH=521	Symbols: APL3 | APL3; glucose-1-phosphate adenylyltransferase | chr4:18259609-18263417 FORWARD	1
Pg_S0635.5	minor CHO metabolism.others	at5g58730.1	AT5G58730.1 | Symbols: | pfkB-like carbohydrate kinase family protein | chr5:23723627-23725324 REVERSE LENGTH=353	pfkB-type carbohydrate kinase family protein | chr5:23723404-23725465 REVERSE	1
Pg_S1415.9	N-metabolism.N-degradation.glutamate dehydrogenase	at5g18170.1	AT5G18170.1 | Symbols: GDH1 | glutamate dehydrogenase 1 | chr5:6006172-6008248 FORWARD LENGTH=411	Symbols: GDH1 | GDH1 (GLUTAMATE DEHYDROGENASE 1); ATP binding / glutamate dehydrogenase [NAD(P)+]/ oxidoreductase | chr5:6006039-6008472 FORWARD	1
Pg_S6074.2	nucleotide metabolism.salvage.nucleoside kinases.adenosine kinase	at5g03300.1	AT5G03300.1 | Symbols: ADK2 | adenosine kinase 2 | chr5:796573-798997 FORWARD LENGTH=345	Symbols: ADK2 | ADK2 (ADENOSINE KINASE 2); adenosine kinase/ copper ion binding / kinase | chr5:796442-799176 FORWARD	1
Pg_S3550.9	OPP.non-reductive PP.transaldolase	at5g13420.1	AT5G13420.1 | Symbols: | Aldolase-type TIM barrel family protein | chr5:4302080-4304212 REVERSE LENGTH=438	transaldolase, putative | chr5:4301792-4304312 REVERSE	1
Pg_S2282.8	secondary metabolism.flavonoids.anthocyanins.anthocyanin 5-aromatic acyltransferase	at1g03495.1	AT1G03495.1 | Symbols: | HXXXD-type acyl-transferase family protein | chr1:873436-874832 FORWARD LENGTH=465	transferase/ transferase, transferring acyl groups other than amino-acyl groups | chr1:873184-874935 FORWARD	1
Pg_S0234.17	secondary metabolism.flavonoids.dihydroflavonols.flavanone 3-hydroxylase	at3g51240.1	AT3G51240.1 | Symbols: F3H, TT6, F3'H | flavanone 3-hydroxylase | chr3:19025409-19026658 FORWARD LENGTH=358	Symbols: F3H, TT6, F3'H | F3H (FLAVANONE 3-HYDROXYLASE); naringenin 3-dioxygenase | chr3:19025264-19026939 FORWARD	1
Pg_S1237.20	secondary metabolism.flavonoids.dihydroflavonols.flavonoid 3''-monooxygenase	at5g07990.1	AT5G07990.1 | Symbols: TT7, CYP75B1, D501 | Cytochrome P450 superfamily protein | chr5:2560437-2562859 FORWARD LENGTH=513	Symbols: TT7, CYP75B1, D501 | TT7 (TRANSPARENT TESTA 7); flavonoid 3'-monooxygenase/ oxygen binding | chr5:2560394-2563109 FORWARD	1
Pg_S6896.2	secondary metabolism.isoprenoids.mevalonate pathway.HMG-CoA synthase	at4g11820.2	AT4G11820.2 | Symbols: MVA1, FKP1 | hydroxymethylglutaryl-CoA synthase / HMG-CoA synthase / 3-hydroxy-3-methylglutaryl coenzyme A synthase | chr4:7109124-7111901 REVERSE LENGTH=461	Symbols: MVA1 | MVA1; acetyl-CoA C-acetyltransferase/ hydroxymethylglutaryl-CoA synthase | chr4:7108915-7112030 REVERSE	1
Pg_S6491.1	secondary metabolism.isoprenoids.terpenoids	at5g23960.1	AT5G23960.1 | Symbols: ATTPS21, TPS21 | terpene synthase 21 | chr5:8092969-8095128 FORWARD LENGTH=547	Symbols: ATTPS21, TPS21 | TPS21 (TERPENE SYNTHASE 21); (-)-E-beta-caryophyllene synthase/ alpha-humulene synthase | chr5:8092969-8095128 FORWARD	1
Pg_S4463.3	secondary metabolism.N misc.alkaloid-like	at1g08470.1	AT1G08470.1 | Symbols: SSL3 | strictosidine synthase-like 3 | chr1:2682262-2683977 REVERSE LENGTH=390	strictosidine synthase family protein | chr1:2682127-2684100 REVERSE	1
Pg_S2245.39	secondary metabolism.phenylpropanoids	at4g35160.1	AT4G35160.1 | Symbols: | O-methyltransferase family protein | chr4:16730989-16732808 REVERSE LENGTH=382	O-methyltransferase family 2 protein | chr4:16730760-16732811 REVERSE	1
Pg_S0622.13	secondary metabolism.phenylpropanoids.lignin biosynthesis.HCT	at5g48930.1	AT5G48930.1 | Symbols: HCT | hydroxycinnamoyl-CoA shikimate/quinate hydroxycinnamoyl transferase | chr5:19836654-19838092 REVERSE LENGTH=433	Symbols: HCT | HCT (HYDROXYCINNAMOYL-COA SHIKIMATE/QUINATE HYDROXYCINNAMOYL TRANSFERASE); quinate O-hydroxycinnamoyltransferase/ shikimate O-hydroxycinnamoyltransferase/ transferase | chr5:19836299-19838162 REVERSE	1
Pg_S4042.1	secondary metabolism.simple phenols	at2g38080.1	AT2G38080.1 | Symbols: IRX12, LAC4, ATLMCO4, LMCO4 | Laccase/Diphenol oxidase family protein | chr2:15934540-15937352 FORWARD LENGTH=558	Symbols: IRX12, LAC4 | IRX12 (IRREGULAR XYLEM 12); laccase | chr2:15934460-15937616 FORWARD	1
Pg_S7281.2	secondary metabolism.wax	at1g67730.1	AT1G67730.1 | Symbols: YBR159, KCR1, ATKCR1 | beta-ketoacyl reductase 1 | chr1:25391676-25393365 FORWARD LENGTH=318	Symbols: YBR159, KCR1 | YBR159; ketoreductase/ oxidoreductase | chr1:25391460-25393610 FORWARD	1
Pg_S4797.4	TCA / org. transformation.other organic acid transformaitons.atp-citrate lyase	at1g09430.1	AT1G09430.1 | Symbols: ACLA-3 | ATP-citrate lyase A-3 | chr1:3042135-3044978 FORWARD LENGTH=424	Symbols: ACLA-3 | ACLA-3; ATP citrate synthase | chr1:3041996-3045402 FORWARD	1
Pg_S3394.17	TCA / org. transformation.other organic acid transformaitons.atp-citrate lyase	at5g49460.1	AT5G49460.1 | Symbols: ACLB-2 | ATP citrate lyase subunit B 2 | chr5:20055048-20058195 FORWARD LENGTH=608	Symbols: ACLB-2 | ACLB-2 (ATP CITRATE LYASE SUBUNIT B 2); ATP citrate synthase | chr5:20054523-20058464 FORWARD	1
Pg_S2143.10	TCA / org. transformation.TCA.pyruvate DH.E1	at5g50850.1	AT5G50850.1 | Symbols: MAB1 | Transketolase family protein | chr5:20689671-20692976 FORWARD LENGTH=363	Symbols: MAB1 | MAB1 (MACCI-BOU); catalytic/ pyruvate dehydrogenase (acetyl-transferring) | chr5:20689390-20693285 FORWARD	1

## Sheet: Cat. activity cluster 2
Table 4. Metabolism overview of proteins related to catalytic activity (GO:0003824) in cluster 2 using MapMan software
Ginseng ID	BinName	[TAIR10]	[TAIR10] Description	MapMan description	Cluster
Pg_S1957.32	amino acid metabolism.degradation.aromatic aa.tryptophan	at3g24360.1	AT3G24360.1 | Symbols: | ATP-dependent caseinolytic (Clp) protease/crotonase family protein | chr3:8839832-8842799 REVERSE LENGTH=418	enoyl-CoA hydratase/isomerase family protein | chr3:8839728-8842831 REVERSE	2
Pg_S6240.3	amino acid metabolism.degradation.aromatic aa.tryptophan	at5g47720.2	AT5G47720.2 | Symbols: | Thiolase family protein | chr5:19331762-19334145 FORWARD LENGTH=415	acetyl-CoA C-acyltransferase, putative / 3-ketoacyl-CoA thiolase, putative | chr5:19331547-19334277 FORWARD	2
Pg_S1506.2	amino acid metabolism.degradation.aspartate family.asparagine.L-asparaginase	at5g08100.1	AT5G08100.1 | Symbols: | N-terminal nucleophile aminohydrolases (Ntn hydrolases) superfamily protein | chr5:2593242-2594586 REVERSE LENGTH=315	L-asparaginase / L-asparagine amidohydrolase | chr5:2593050-2594651 REVERSE	2
Pg_S5838.2	amino acid metabolism.degradation.aspartate family.methionine	at3g23810.1	AT3G23810.1 | Symbols: SAHH2, ATSAHH2 | S-adenosyl-l-homocysteine (SAH) hydrolase 2 | chr3:8588013-8589671 REVERSE LENGTH=485	Symbols: SAHH2, ATSAHH2 | SAHH2 (S-ADENOSYL-L-HOMOCYSTEINE (SAH) HYDROLASE 2); adenosylhomocysteinase/ binding / catalytic | chr3:8587664-8589713 REVERSE	2
Pg_S2706.12	amino acid metabolism.degradation.aspartate family.methionine	at4g13940.1	AT4G13940.1 | Symbols: HOG1, EMB1395, SAHH1, MEE58, ATSAHH1 | S-adenosyl-L-homocysteine hydrolase | chr4:8054931-8056676 FORWARD LENGTH=485	Symbols: HOG1, EMB1395, SAHH1, MEE58, ATSAHH1 | MEE58 (MATERNAL EFFECT EMBRYO ARREST 58); adenosylhomocysteinase/ copper ion binding | chr4:8054862-8057139 FORWARD	2
Pg_S6240.3	amino acid metabolism.degradation.branched chain group.isoleucine	at5g47720.2	AT5G47720.2 | Symbols: | Thiolase family protein | chr5:19331762-19334145 FORWARD LENGTH=415	acetyl-CoA C-acyltransferase, putative / 3-ketoacyl-CoA thiolase, putative | chr5:19331547-19334277 FORWARD	2
Pg_S5204.6	amino acid metabolism.degradation.branched-chain group.shared	at3g06850.1	AT3G06850.1 | Symbols: BCE2, LTA1, DIN3 | 2-oxoacid dehydrogenases acyltransferase family protein | chr3:2158212-2160465 REVERSE LENGTH=483	Symbols: BCE2, LTA1, DIN3 | BCE2; acetyltransferase/ alpha-ketoacid dehydrogenase/ dihydrolipoamide branched chain acyltransferase | chr3:2157974-2160623 REVERSE	2
Pg_S7119.3	amino acid metabolism.degradation.histidine	at1g43710.1	AT1G43710.1 | Symbols: emb1075 | Pyridoxal phosphate (PLP)-dependent transferases superfamily protein | chr1:16486534-16488298 REVERSE LENGTH=482	Symbols: emb1075 | emb1075 (embryo defective 1075); carboxy-lyase/ catalytic/ pyridoxal phosphate binding | chr1:16486320-16488384 REVERSE	2
Pg_S0724.21	amino acid metabolism.degradation.serine-glycine-cysteine group.glycine	at1g72190.1	AT1G72190.1 | Symbols: | D-isomer specific 2-hydroxyacid dehydrogenase family protein | chr1:27167458-27169696 REVERSE LENGTH=373	oxidoreductase family protein | chr1:27167363-27169717 REVERSE	2
Pg_S0981.22	amino acid metabolism.synthesis.aromatic aa.chorismate.3-dehydroquinate synthase	at5g66120.2	AT5G66120.2 | Symbols: | 3-dehydroquinate synthase, putative | chr5:26431516-26433649 REVERSE LENGTH=442	3-dehydroquinate synthase, putative | chr5:26431376-26433778 REVERSE	2
Pg_S1018.4	amino acid metabolism.synthesis.aromatic aa.chorismate.3-deoxy-D-arabino-heptulosonate 7-phosphate synthase	at1g22410.1	AT1G22410.1 | Symbols: | Class-II DAHP synthetase family protein | chr1:7912120-7914742 FORWARD LENGTH=527	2-dehydro-3-deoxyphosphoheptonate aldolase, putative / 3-deoxy-D-arabino-heptulosonate 7-phosphate synthase, putative / DAHP synthetase, putative | chr1:7912046-7915003 FORWARD	2
Pg_S1106.3	amino acid metabolism.synthesis.aromatic aa.chorismate.3-deoxy-D-arabino-heptulosonate 7-phosphate synthase	at4g39980.1	AT4G39980.1 | Symbols: DHS1 | 3-deoxy-D-arabino-heptulosonate 7-phosphate synthase 1 | chr4:18539654-18541832 FORWARD LENGTH=525	Symbols: DHS1 | DHS1 (3-DEOXY-D-ARABINO-HEPTULOSONATE 7-PHOSPHATE SYNTHASE 1); 3-deoxy-7-phosphoheptulonate synthase | chr4:18539575-18542093 FORWARD	2
Pg_S0109.34	amino acid metabolism.synthesis.aromatic aa.tryptophan.anthranilate synthase	at2g29690.1	AT2G29690.1 | Symbols: ASA2, ATHANSYNAB | anthranilate synthase 2 | chr2:12693899-12696791 FORWARD LENGTH=621	Symbols: ASA2, ATHANSYNAB | ASA2 (ANTHRANILATE SYNTHASE 2); anthranilate synthase | chr2:12693871-12696975 FORWARD	2
Pg_S2190.36	amino acid metabolism.synthesis.aromatic aa.tryptophan.tryptophan synthase	at5g54810.1	AT5G54810.1 | Symbols: TSB1, TRPB, TRP2, ATTSB1 | tryptophan synthase beta-subunit 1 | chr5:22264805-22266738 REVERSE LENGTH=470	Symbols: TSB1, TRPB, TRP2, ATTSB1 | TSB1 (TRYPTOPHAN SYNTHASE BETA-SUBUNIT 1); tryptophan synthase | chr5:22264594-22266785 REVERSE	2
Pg_S3109.20	amino acid metabolism.synthesis.aspartate family.lysine.diaminopimelate decarboxylase	at5g11880.1	AT5G11880.1 | Symbols: | Pyridoxal-dependent decarboxylase family protein | chr5:3827806-3829942 REVERSE LENGTH=489	diaminopimelate decarboxylase, putative / DAP carboxylase, putative | chr5:3827526-3829986 REVERSE	2
Pg_S3077.2	amino acid metabolism.synthesis.aspartate family.lysine.diaminopimelate epimerase	at3g53580.1	AT3G53580.1 | Symbols: | diaminopimelate epimerase family protein | chr3:19864784-19866907 FORWARD LENGTH=362	diaminopimelate epimerase family protein | chr3:19864757-19867134 FORWARD	2
Pg_S0588.26	amino acid metabolism.synthesis.aspartate family.lysine.dihydrodipicolinate synthase	at2g45440.1	AT2G45440.1 | Symbols: DHDPS2 | dihydrodipicolinate synthase | chr2:18731294-18732867 FORWARD LENGTH=365	Symbols: DHDPS2 | DHDPS2 (DIHYDRODIPICOLINATE SYNTHASE); catalytic/ dihydrodipicolinate synthase/ lyase | chr2:18730840-18733015 FORWARD	2
Pg_S0741.54	amino acid metabolism.synthesis.aspartate family.methionine.cystathionine beta-lyase	at3g57050.1	AT3G57050.1 | Symbols: CBL | cystathionine beta-lyase | chr3:21111939-21114521 REVERSE LENGTH=464	Symbols: CBL | CBL (cystathionine beta-lyase); cystathionine beta-lyase | chr3:21111700-21114662 REVERSE	2
Pg_S8437.3	amino acid metabolism.synthesis.aspartate family.methionine.methionine synthase	at3g03780.1	AT3G03780.1 | Symbols: ATMS2, MS2 | methionine synthase 2 | chr3:957602-960740 FORWARD LENGTH=765	Symbols: ATMS2 | AtMS2; 5-methyltetrahydropteroyltriglutamate-homocysteine S-methyltransferase/ methionine synthase | chr3:957235-960980 FORWARD	2
Pg_S1400.29	amino acid metabolism.synthesis.aspartate family.methionine.S-adenosylmethionine synthetase	at1g02500.1	AT1G02500.1 | Symbols: SAM1, SAM-1, MAT1, AtSAM1 | S-adenosylmethionine synthetase 1 | chr1:519037-520218 FORWARD LENGTH=393	Symbols: SAM1, SAM-1, MAT1 | SAM1 (S-ADENOSYLMETHIONINE SYNTHETASE 1); methionine adenosyltransferase | chr1:518251-520437 FORWARD	2
Pg_S2961.5	amino acid metabolism.synthesis.aspartate family.misc.homoserine.aspartate kinase	at1g31230.1	AT1G31230.1 | Symbols: AK-HSDH I, AK-HSDH | aspartate kinase-homoserine dehydrogenase i | chr1:11158744-11163055 REVERSE LENGTH=911	Symbols: AK-HSDH I, AK-HSDH | AK-HSDH I (ASPARTATE KINASE-HOMOSERINE DEHYDROGENASE I); aspartate kinase/ homoserine dehydrogenase | chr1:11158618-11163274 REVERSE	2
Pg_S2791.8	amino acid metabolism.synthesis.aspartate family.misc.homoserine.homoserine kinase	at2g17265.1	AT2G17265.1 | Symbols: HSK, DMR1 | homoserine kinase | chr2:7508606-7509718 FORWARD LENGTH=370	Symbols: HSK | HSK (HOMOSERINE KINASE); homoserine kinase | chr2:7508588-7509755 FORWARD	2
Pg_S1858.24	amino acid metabolism.synthesis.branched chain group.common.branched-chain amino acid aminotransferase	at3g49680.1	AT3G49680.1 | Symbols: ATBCAT-3, BCAT3 | branched-chain aminotransferase 3 | chr3:18422768-18425473 FORWARD LENGTH=413	Symbols: ATBCAT-3, BCAT3 | BCAT3 (BRANCHED-CHAIN AMINOTRANSFERASE 3); branched-chain-amino-acid transaminase/ catalytic | chr3:18422649-18425693 FORWARD	2
Pg_S2148.3	amino acid metabolism.synthesis.branched chain group.common.ketol-acid reductoisomerase	at3g58610.1	AT3G58610.1 | Symbols: | ketol-acid reductoisomerase | chr3:21671561-21674639 FORWARD LENGTH=591	ketol-acid reductoisomerase | chr3:21671433-21674841 FORWARD	2
Pg_S5998.6	amino acid metabolism.synthesis.branched chain group.leucine specific.2-isopropylmalate synthase	at1g74040.1	AT1G74040.1 | Symbols: IMS1, MAML-3, IPMS2 | 2-isopropylmalate synthase 1 | chr1:27842258-27845566 FORWARD LENGTH=631	Symbols: IMS1, MAML-3, IPMS2 | IMS1 (2-ISOPROPYLMALATE SYNTHASE 1); 2-isopropylmalate synthase | chr1:27842171-27845776 FORWARD	2
Pg_S6920.1	amino acid metabolism.synthesis.branched chain group.leucine specific.3-isopropylmalate dehydrogenase	at1g80560.1	AT1G80560.1 | Symbols: ATIMD2, IMD2 | isopropylmalate dehydrogenase 2 | chr1:30287833-30290126 FORWARD LENGTH=405	3-isopropylmalate dehydrogenase, chloroplast, putative | chr1:30287763-30290298 FORWARD	2
[truncated: 165 more rows]

## Sheet: Cat. activity cluster 3
Table 5. Metabolism overview of proteins related to catalytic activity (GO:0003824) in cluster 3 using MapMan software
[truncated: 78 more rows]

## Sheet: Cat. activity cluster 4
Table 6. Metabolism overview of proteins related to catalytic activity (GO:0003824) in cluster 4 using MapMan software
[truncated: 141 more rows]
