# Supplementary material for: Optimization of Protein Isolation and Label-Free Quantitative Proteomic Analysis in Four Different Tissues of Korean Ginseng
Source: Plants (Basel). 2021 Jul 9;10(7):1409. doi: 10.3390/plants10071409 (PMC8309323; doi:10.3390/plants10071409)
Supplement: Supplementary file 1 [file plants-10-01409-s001.zip › Table S4.xlsx]

## Sheet: Cell function
Table 1. Cell function of proteins specific to fruit, leaf, root, and shoot using MapMan software
Ginseng ID	BinName	[TAIR10]	[TAIR10] Description	MapMan description	Tissue
Pg_S2096.8	stress.abiotic.heat	AT1G16030.1	AT1G16030.1 | Symbols: Hsp70b | heat shock protein 70B | chr1:5502386-5504326 REVERSE LENGTH=646	Symbols: Hsp70b | Hsp70b (heat shock protein 70B); ATP binding | chr1:5502206-5504535 REVERSE	Fruit
Pg_S2342.1	stress.abiotic.heat	AT5G12020.1	AT5G12020.1 | Symbols: HSP17.6II | 17.6 kDa class II heat shock protein | chr5:3882409-3882876 REVERSE LENGTH=155	Symbols: HSP17.6II | HSP17.6II (17.6 KDA CLASS II HEAT SHOCK PROTEIN) | chr5:3882237-3882938 REVERSE	Fruit
Pg_S3029.11	stress.abiotic.cold	AT5G55530.1	AT5G55530.1 | Symbols: | Calcium-dependent lipid-binding (CaLB domain) family protein | chr5:22494439-22495656 FORWARD LENGTH=405	C2 domain-containing protein | chr5:22493324-22495956 FORWARD	Fruit
Pg_S0403.60	stress.abiotic.unspecified	AT1G11360.1	AT1G11360.1 | Symbols: | Adenine nucleotide alpha hydrolases-like superfamily protein | chr1:3822171-3822899 REVERSE LENGTH=242	universal stress protein (USP) family protein | chr1:3821460-3823053 REVERSE	Fruit
Pg_S5056.9	stress.abiotic.unspecified	AT1G76180.1	AT1G76180.1 | Symbols: ERD14 | Dehydrin family protein | chr1:28587013-28587657 REVERSE LENGTH=185	Symbols: ERD14 | ERD14 (EARLY RESPONSE TO DEHYDRATION 14); calcium ion binding | chr1:28586773-28587877 REVERSE	Fruit
Pg_S1116.32	redox.ascorbate and glutathione.glutathione	AT4G11600.1	AT4G11600.1 | Symbols: ATGPX6, PHGPX, LSC803, GPX6 | glutathione peroxidase 6 | chr4:7010021-7011330 REVERSE LENGTH=232	Symbols: ATGPX6, PHGPX, LSC803 | ATGPX6 (GLUTATHIONE PEROXIDASE 6); glutathione peroxidase | chr4:7009769-7011375 REVERSE	Fruit
Pg_S7765.2	RNA.regulation of transcription.LUG	AT2G32700.7	AT2G32700.7 | Symbols: LUH | LEUNIG_homolog | chr2:13867235-13871844 FORWARD LENGTH=806	Symbols: LUH | WD-40 repeat family protein | chr2:13866798-13872157 FORWARD	Fruit
Pg_S4786.3	protein.aa activation.tyrosine-tRNA ligase	AT3G02660.1	AT3G02660.1 | Symbols: emb2768 | Tyrosyl-tRNA synthetase, class Ib, bacterial/mitochondrial | chr3:570221-571756 REVERSE LENGTH=511	Symbols: emb2768 | emb2768 (EMBRYO DEFECTIVE 2768); ATP binding / RNA binding / aminoacyl-tRNA ligase/ nucleotide binding / tyrosine-tRNA ligase | chr3:570134-572345 REVERSE	Fruit
Pg_S2568.16	protein.postranslational modification	AT1G60940.1	AT1G60940.1 | Symbols: SNRK2-10, SNRK2.10, SRK2B | SNF1-related protein kinase 2.10 | chr1:22439398-22441896 REVERSE LENGTH=361	Symbols: SNRK2-10, SNRK2.10, SRK2B | SNRK2.10 (SNF1-RELATED PROTEIN KINASE 2.10); kinase | chr1:22439123-22442190 REVERSE	Fruit
Pg_S2295.19	protein.degradation.subtilases	AT4G15040.1	AT4G15040.1 | Symbols: | Subtilisin-like serine endopeptidase family protein | chr4:8581373-8584122 REVERSE LENGTH=687	identical protein binding / serine-type endopeptidase | chr4:8581373-8584122 REVERSE	Fruit
Pg_S5485.7	cell.organisation	AT2G33385.2	AT2G33385.2 | Symbols: arpc2b | actin-related protein C2B | chr2:14147604-14149769 REVERSE LENGTH=374	Symbols: arpc2b | arpc2b (actin-related protein C2B); structural molecule | chr2:14147503-14149769 REVERSE	Fruit
Pg_S5990.1	cell.cycle.peptidylprolyl isomerase	AT5G48570.1	AT5G48570.1 | Symbols: ROF2, ATFKBP65, FKBP65 | FKBP-type peptidyl-prolyl cis-trans isomerase family protein | chr5:19690746-19693656 REVERSE LENGTH=578	Symbols: ROF2, ATFKBP65 | peptidyl-prolyl cis-trans isomerase, putative / FK506-binding protein, putative | chr5:19690542-19693845 REVERSE	Fruit
Pg_S1195.16	development.unspecified	AT1G70670.1	AT1G70670.1 | Symbols: | Caleosin-related family protein | chr1:26644830-26645970 FORWARD LENGTH=195	caleosin-related family protein | chr1:26644582-26646173 FORWARD	Fruit
Pg_S1400.42	development.unspecified	AT3G15880.2	AT3G15880.2 | Symbols: WSIP2, TPR4 | WUS-interacting protein 2 | chr3:5364454-5371869 REVERSE LENGTH=1137	Symbols: WSIP2, TPR4 | protein binding | chr3:5364081-5372289 REVERSE	Fruit
Pg_S4782.4	misc.UDP glucosyl and glucoronyl transferases	AT1G22340.1	AT1G22340.1 | Symbols: AtUGT85A7, UGT85A7 | UDP-glucosyl transferase 85A7 | chr1:7890464-7892090 REVERSE LENGTH=487	Symbols: AtUGT85A7 | AtUGT85A7 (UDP-glucosyl transferase 85A7); UDP-glycosyltransferase/ glucuronosyltransferase/ transferase, transferring glycosyl groups | chr1:7890464-7892090 REVERSE	Fruit
Pg_S0812.20	misc.gluco-, galacto- and mannosidases	AT2G20680.1	AT2G20680.1 | Symbols: MAN2, AtMAN2 | Glycosyl hydrolase superfamily protein | chr2:8921024-8923066 FORWARD LENGTH=433	glycosyl hydrolase family 5 protein / cellulase family protein | chr2:8920467-8923173 FORWARD	Fruit
Pg_S1415.3	misc.myrosinases-lectin-jacalin	AT1G73040.1	AT1G73040.1 | Symbols: | Mannose-binding lectin superfamily protein | chr1:27475159-27475777 REVERSE LENGTH=176	jacalin lectin family protein | chr1:27475060-27475962 REVERSE	Fruit
Pg_S3327.8	misc.calcineurin-like phosphoesterase family protein	AT1G53710.1	AT1G53710.1 | Symbols: | Calcineurin-like metallo-phosphoesterase superfamily protein | chr1:20053339-20056271 REVERSE LENGTH=528	hydrolase/ protein serine/threonine phosphatase | chr1:20053161-20056396 REVERSE	Fruit
Pg_S0981.13	not assigned.no ontology	AT1G50590.1	AT1G50590.1 | Symbols: | RmlC-like cupins superfamily protein | chr1:18732378-18734053 REVERSE LENGTH=310	pirin, putative | chr1:18732378-18734053 REVERSE	Fruit
Pg_S3174.2	not assigned.no ontology.C2 domain-containing protein	AT3G57880.1	AT3G57880.1 | Symbols: | Calcium-dependent lipid-binding (CaLB domain) plant phosphoribosyltransferase family protein | chr3:21431198-21433519 REVERSE LENGTH=773	C2 domain-containing protein | chr3:21430983-21434600 REVERSE	Fruit
Pg_S1583.25	not assigned.no ontology.late embryogenesis abundant domain-containing protein	AT4G36600.1	AT4G36600.1 | Symbols: | Late embryogenesis abundant (LEA) protein | chr4:17263666-17264968 FORWARD LENGTH=353	FUNCTIONS IN: molecular_function unknown; INVOLVED IN: embryonic development ending in seed dormancy; EXPRESSED IN: 6 plant structures; EXPRESSED DURING: M germinated pollen stage, 4 anthesis, petal differentiation and expansion stage; CONTAINS InterPro DOMAIN/s: Late embryogenesis abundant protein (InterPro:IPR004238); BEST Arabidopsis thaliana protein match is: late embryogenesis abundant domai…	Fruit
Pg_S1033.8	not assigned.unknown	AT5G43490.1	AT5G43490.1 | Symbols: | unknown protein; Has 1807 Blast hits to 1807 proteins in 277 species: Archae - 0; Bacteria - 0; Metazoa - 736; Fungi - 347; Plants - 385; Viruses - 0; Other Eukaryotes - 339 (source: NCBI BLink). | chr5:17468471-17469256 REVERSE LENGTH=185	unknown protein | chr5:17468471-17468866 REVERSE	Fruit
Pg_S5273.12	not assigned.unknown	AT5G02480.1	AT5G02480.1 | Symbols: | HSP20-like chaperones superfamily protein | chr5:548152-549678 FORWARD LENGTH=508	LOCATED IN: cellular_component unknown; EXPRESSED IN: 22 plant structures; EXPRESSED DURING: 13 growth stages; CONTAINS InterPro DOMAIN/s: Heat shock protein Hsp20 (InterPro:IPR002068), HSP20-like chaperone (InterPro:IPR008978); BEST Arabidopsis thaliana protein match is: SLT1 (sodium- and lithium-tolerant 1) (TAIR:AT2G37570.1); Has 60 Blast hits to 60 proteins in 8 species: Archae - 0; Bacteria …	Fruit
Pg_S1881.25	hormone metabolism.brassinosteroid.synthesis-degradation.sterols.other	AT1G58440.1	AT1G58440.1 | Symbols: XF1, SQE1 | FAD/NAD(P)-binding oxidoreductase family protein | chr1:21714094-21717246 REVERSE LENGTH=531	Symbols: XF1, SQE1 | XF1; squalene monooxygenase | chr1:21713842-21717290 REVERSE	Leaf
Pg_S1163.7	hormone metabolism.ethylene.synthesis-degradation	AT1G48420.1	AT1G48420.1 | Symbols: D-CDES, ATACD1, ACD1 | D-cysteine desulfhydrase | chr1:17896767-17898803 REVERSE LENGTH=401	Symbols: D-CDES | D-CDES (D-CYSTEINE DESULFHYDRASE); 1-aminocyclopropane-1-carboxylate deaminase/ D-cysteine desulfhydrase/ catalytic | chr1:17896597-17898804 REVERSE	Leaf
Pg_S0423.32	stress.abiotic.unspecified	AT5G20630.1	AT5G20630.1 | Symbols: GLP3, GLP3A, GLP3B, ATGER3, GER3 | germin 3 | chr5:6975315-6975950 REVERSE LENGTH=211	Symbols: GLP3, GLP3A, GLP3B, ATGER3, GER3 | GER3 (GERMIN 3); oxalate oxidase | chr5:6975104-6975993 REVERSE	Leaf
Pg_S0953.16	redox.thioredoxin	AT5G08410.1	AT5G08410.1 | Symbols: FTRA2 | ferredoxin/thioredoxin reductase subunit A (variable subunit) 2 | chr5:2709974-2710528 REVERSE LENGTH=184	Symbols: FTRA2 | FTRA2 (ferredoxin/thioredoxin reductase subunit A (variable subunit) 2); catalytic/ ferredoxin reductase/ ferredoxin:thioredoxin reductase/ lipoate synthase | chr5:2709848-2710583 REVERSE	Leaf
Pg_S5365.8	redox.thioredoxin	AT2G17420.1	AT2G17420.1 | Symbols: NTRA, ATNTRA, NTR2 | NADPH-dependent thioredoxin reductase A | chr2:7564357-7566219 FORWARD LENGTH=378	Symbols: NTRA, ATNTRA, NTR2 | NTRA (NADPH-DEPENDENT THIOREDOXIN REDUCTASE A); thioredoxin-disulfide reductase | chr2:7564345-7566539 FORWARD	Leaf
Pg_S0431.62	RNA.processing	AT3G03710.1	AT3G03710.1 | Symbols: RIF10, PNP | polyribonucleotide nucleotidyltransferase, putative | chr3:919542-924906 FORWARD LENGTH=922	Symbols: RIF10 | RIF10 (resistant to inhibition with FSM 10); 3'-5'-exoribonuclease/ RNA binding / nucleic acid binding / polyribonucleotide nucleotidyltransferase | chr3:919542-925338 FORWARD	Leaf
Pg_S5970.7	RNA.processing.ribonucleases	AT3G20390.1	AT3G20390.1 | Symbols: | endoribonuclease L-PSP family protein | chr3:7110227-7111695 REVERSE LENGTH=187	endoribonuclease L-PSP family protein | chr3:7109949-7111824 REVERSE	Leaf
Pg_S3169.2	RNA.processing.ribonucleases	AT2G02990.1	AT2G02990.1 | Symbols: RNS1, ATRNS1 | ribonuclease 1 | chr2:873714-874667 FORWARD LENGTH=230	Symbols: RNS1, ATRNS1 | RNS1 (RIBONUCLEASE 1); endoribonuclease/ ribonuclease | chr2:873506-874811 FORWARD	Leaf
Pg_S5458.2	RNA.processing.ribonucleases	AT1G77680.1	AT1G77680.1 | Symbols: | Ribonuclease II/R family protein | chr1:29192188-29195963 REVERSE LENGTH=1055	ribonuclease II family protein | chr1:29191834-29196287 REVERSE	Leaf
Pg_S6490.3	RNA.regulation of transcription.General Transcription	AT5G09250.1	AT5G09250.1 | Symbols: KIWI | ssDNA-binding transcriptional regulator | chr5:2875421-2876368 REVERSE LENGTH=107	Symbols: KIWI | KIWI; DNA binding / protein binding / transcription coactivator | chr5:2875232-2876575 REVERSE	Leaf
Pg_S0439.44	RNA.regulation of transcription.Nucleosome/chromatin assembly factor group	AT3G28730.1	AT3G28730.1 | Symbols: ATHMG, SSRP1, NFD, HMG | high mobility group | chr3:10784954-10788498 FORWARD LENGTH=646	Symbols: ATHMG, SSRP1, NFD | ATHMG (ARABIDOPSIS THALIANA HIGH MOBILITY GROUP); transcription factor | chr3:10784889-10788729 FORWARD	Leaf
Pg_S0522.1	RNA.regulation of transcription.putative transcription regulator	AT3G05060.1	AT3G05060.1 | Symbols: | NOP56-like pre RNA processing ribonucleoprotein | chr3:1413174-1415564 REVERSE LENGTH=533	SAR DNA-binding protein, putative | chr3:1412867-1415966 REVERSE	Leaf
Pg_S2647.19	RNA.regulation of transcription.SET-domain transcriptional regulator family	AT5G14260.3	AT5G14260.3 | Symbols: | Rubisco methyltransferase family protein | chr5:4601139-4603873 FORWARD LENGTH=514	SET domain-containing protein | chr5:4600996-4604447 FORWARD	Leaf
Pg_S3178.21	RNA.transcription	ATCG00180.1	ATCG00180.1 | Symbols: RPOC1 | DNA-directed RNA polymerase family protein | chrC:20251-23084 REVERSE LENGTH=680	Symbols: RPOC1 | RNA polymerase beta' subunit-1 | chrC:20251-23084 REVERSE	Leaf
Pg_S0905.32	DNA.synthesis/chromatin structure	AT2G47450.1	AT2G47450.1 | Symbols: CAO, CPSRP43 | chloroplast signal recognition particle component (CAO) | chr2:19472781-19473902 FORWARD LENGTH=373	Symbols: CAO, CPSRP43 | CAO (CHAOS); chromatin binding | chr2:19472681-19474314 FORWARD	Leaf
Pg_S3099.10	DNA.synthesis/chromatin structure	AT1G14900.1	AT1G14900.1 | Symbols: HMGA | high mobility group A | chr1:5138665-5139353 REVERSE LENGTH=204	Symbols: HMGA | HMGA (HIGH MOBILITY GROUP A); DNA binding | chr1:5138334-5139432 REVERSE	Leaf
Pg_S1613.8	DNA.synthesis/chromatin structure	AT5G46580.1	AT5G46580.1 | Symbols: | pentatricopeptide (PPR) repeat-containing protein | chr5:18897510-18899645 REVERSE LENGTH=711	pentatricopeptide (PPR) repeat-containing protein | chr5:18897445-18899645 REVERSE	Leaf
Pg_S2791.12	protein.aa activation	AT5G22800.1	AT5G22800.1 | Symbols: EMB86, EMB1030, EMB263 | Alanyl-tRNA synthetase, class IIc | chr5:7616221-7619961 REVERSE LENGTH=978	Symbols: EMB1030 | EMB1030 (EMBRYO DEFECTIVE 1030); ATP binding / alanine-tRNA ligase/ ligase, forming aminoacyl-tRNA and related compounds / nucleic acid binding / nucleotide binding | chr5:7616073-7619981 REVERSE	Leaf
Pg_S4870.14	protein.aa activation.isoleucine-tRNA ligase	AT4G10320.1	AT4G10320.1 | Symbols: | tRNA synthetase class I (I, L, M and V) family protein | chr4:6397526-6404509 REVERSE LENGTH=1190	isoleucyl-tRNA synthetase, putative / isoleucine--tRNA ligase, putative | chr4:6397330-6404596 REVERSE	Leaf
Pg_S6586.8	protein.aa activation.lysine-tRNA ligase	AT3G13490.1	AT3G13490.1 | Symbols: OVA5, ATKRS-2 | Lysyl-tRNA synthetase, class II | chr3:4395984-4399302 REVERSE LENGTH=602	Symbols: OVA5, ATKRS-2 | OVA5 (OVULE ABORTION 5); ATP binding / aminoacyl-tRNA ligase/ lysine-tRNA ligase/ nucleic acid binding / nucleotide binding | chr3:4395725-4399325 REVERSE	Leaf
Pg_S0930.19	protein.aa activation.serine-tRNA ligase	AT1G11870.2	AT1G11870.2 | Symbols: ATSRS, SRS | Seryl-tRNA synthetase | chr1:4003895-4006556 FORWARD LENGTH=514	Symbols: ATSRS, SRS | SRS (SERYL-TRNA SYNTHETASE); serine-tRNA ligase | chr1:4003846-4006739 FORWARD	Leaf
Pg_S3277.15	protein.aa activation.tyrosine-tRNA ligase	AT3G02660.1	AT3G02660.1 | Symbols: emb2768 | Tyrosyl-tRNA synthetase, class Ib, bacterial/mitochondrial | chr3:570221-571756 REVERSE LENGTH=511	Symbols: emb2768 | emb2768 (EMBRYO DEFECTIVE 2768); ATP binding / RNA binding / aminoacyl-tRNA ligase/ nucleotide binding / tyrosine-tRNA ligase | chr3:570134-572345 REVERSE	Leaf
Pg_S2428.16	protein.aa activation.valine-tRNA ligase	AT5G16715.1	AT5G16715.1 | Symbols: EMB2247 | ATP binding;valine-tRNA ligases;aminoacyl-tRNA ligases;nucleotide binding;ATP binding;aminoacyl-tRNA ligases | chr5:5485353-5493229 FORWARD LENGTH=974	Symbols: EMB2247 | EMB2247 (embryo defective 2247); ATP binding / aminoacyl-tRNA ligase/ nucleotide binding / valine-tRNA ligase | chr5:5485353-5493520 FORWARD	Leaf
Pg_S2912.1	protein.degradation	AT5G42390.1	AT5G42390.1 | Symbols: | Insulinase (Peptidase family M16) family protein | chr5:16945308-16952647 FORWARD LENGTH=1265	metalloendopeptidase | chr5:16945251-16953100 FORWARD	Leaf
Pg_S0431.68	protein.degradation	AT5G35220.1	AT5G35220.1 | Symbols: EGY1 | Peptidase M50 family protein | chr5:13484606-13487546 REVERSE LENGTH=548	Symbols: EGY1 | EGY1 (ETHYLENE-DEPENDENT GRAVITROPISM-DEFICIENT AND YELLOW-GREEN 1); metalloendopeptidase | chr5:13484431-13487584 REVERSE	Leaf
Pg_S0810.52	protein.degradation.serine protease	AT5G23210.1	AT5G23210.1 | Symbols: SCPL34 | serine carboxypeptidase-like 34 | chr5:7810892-7814837 FORWARD LENGTH=499	Symbols: SCPL34 | SCPL34; serine-type carboxypeptidase | chr5:7810683-7815039 FORWARD	Leaf
Pg_S1202.7	protein.degradation.serine protease	AT5G51070.1	AT5G51070.1 | Symbols: ERD1, CLPD, SAG15 | Clp ATPase | chr5:20764479-20768481 FORWARD LENGTH=945	Symbols: ERD1, CLPD | ERD1 (EARLY RESPONSIVE TO DEHYDRATION 1); ATP binding / ATPase/ nucleoside-triphosphatase/ nucleotide binding / protein binding | chr5:20764315-20768681 FORWARD	Leaf
Pg_S0399.31	protein.degradation.serine protease	AT4G17040.1	AT4G17040.1 | Symbols: CLPR4 | CLP protease R subunit 4 | chr4:9586740-9589297 REVERSE LENGTH=305	ATP-dependent Clp protease proteolytic subunit, putative | chr4:9585705-9589362 REVERSE	Leaf
Pg_S3669.9	protein.degradation.serine protease	AT5G39830.1	AT5G39830.1 | Symbols: DEGP8, DEG8 | Trypsin family protein with PDZ domain | chr5:15942883-15945676 FORWARD LENGTH=448	Symbols: DEGP8, DEG8 | DEG8; peptidase/ serine-type peptidase | chr5:15942797-15945827 FORWARD	Leaf
Pg_S2764.5	protein.degradation.ubiquitin.E3.SCF.FBOX	AT2G39940.1	AT2G39940.1 | Symbols: COI1 | RNI-like superfamily protein | chr2:16672848-16675486 REVERSE LENGTH=592	Symbols: COI1 | COI1 (CORONATINE INSENSITIVE 1); protein binding / ubiquitin-protein ligase | chr2:16672493-16675748 REVERSE	Leaf
Pg_S1143.3	protein.postranslational modification	AT5G58140.2	AT5G58140.2 | Symbols: PHOT2, NPL1 | phototropin 2 | chr5:23524771-23529993 FORWARD LENGTH=915	Symbols: PHOT2, NPL1 | PHOT2 (PHOTOTROPIN 2); FMN binding / blue light photoreceptor/ kinase/ protein serine/threonine kinase | chr5:23524427-23533111 FORWARD	Leaf
Pg_S1073.6	protein.synthesis.elongation	AT1G45332.1	AT1G45332.1 | Symbols: | Translation elongation factor EFG/EF2 protein | chr1:17172507-17176683 REVERSE LENGTH=754	mitochondrial elongation factor, putative | chr1:17172322-17176821 REVERSE	Leaf
Pg_S0536.31	protein.synthesis.elongation	AT3G08740.1	AT3G08740.1 | Symbols: | elongation factor P (EF-P) family protein | chr3:2654788-2656154 REVERSE LENGTH=236	elongation factor P (EF-P) family protein | chr3:2654626-2656239 REVERSE	Leaf
Pg_S4800.3	protein.synthesis.elongation	AT2G31060.3	AT2G31060.3 | Symbols: | elongation factor family protein | chr2:13213496-13218544 REVERSE LENGTH=671	elongation factor family protein | chr2:13213172-13218585 REVERSE	Leaf
Pg_S3590.3	protein.synthesis.elongation	AT4G29060.1	AT4G29060.1 | Symbols: emb2726 | elongation factor Ts family protein | chr4:14317744-14321315 FORWARD LENGTH=953	Symbols: emb2726 | emb2726 (embryo defective 2726); RNA binding / translation elongation factor | chr4:14317256-14321567 FORWARD	Leaf
Pg_S4667.5	protein.synthesis.initiation	AT1G17220.1	AT1G17220.1 | Symbols: FUG1 | Translation initiation factor 2, small GTP-binding protein | chr1:5885383-5890165 FORWARD LENGTH=1026	Symbols: FUG1 | FUG1 (fu-gaeri1); translation initiation factor | chr1:5885083-5890470 FORWARD	Leaf
Pg_S3787.1	protein.synthesis.release	AT5G36170.1	AT5G36170.1 | Symbols: HCF109, ATPRFB | high chlorophyll fluorescent 109 | chr5:14236083-14237974 REVERSE LENGTH=456	Symbols: HCF109, ATPRFB | HCF109 (HIGH CHLOROPHYLL FLUORESCENT 109); translation release factor/ translation release factor, codon specific | chr5:14235876-14238026 REVERSE	Leaf
Pg_S4533.13	protein.synthesis.release	AT2G47020.1	AT2G47020.1 | Symbols: | Peptide chain release factor 1 | chr2:19320090-19322279 REVERSE LENGTH=413	peptide chain release factor, putative | chr2:19319685-19322390 REVERSE	Leaf
Pg_S6835.6	protein.synthesis.ribosomal protein.prokaryotic.chloroplast.30S subunit.PSRP3	AT1G68590.1	AT1G68590.1 | Symbols: | Ribosomal protein PSRP-3/Ycf65 | chr1:25757593-25758169 REVERSE LENGTH=166	plastid-specific 30S ribosomal protein 3, putative / PSRP-3, putative | chr1:25757404-25758232 REVERSE	Leaf
Pg_S6053.14	protein.synthesis.ribosomal protein.prokaryotic.chloroplast.30S subunit.S17	AT1G79850.1	AT1G79850.1 | Symbols: RPS17, CS17, PRPS17 | ribosomal protein S17 | chr1:30041473-30041922 REVERSE LENGTH=149	Symbols: RPS17, CS17, PRPS17 | RPS17 (RIBOSOMAL PROTEIN S17); structural constituent of ribosome | chr1:30041243-30041952 REVERSE	Leaf
Pg_S1813.13	protein.synthesis.ribosomal protein.prokaryotic.chloroplast.30S subunit.S2	ATCG00160.1	ATCG00160.1 | Symbols: RPS2 | ribosomal protein S2 | chrC:15013-15723 REVERSE LENGTH=236	Symbols: RPS2 | Chloroplast ribosomal protein S2 | chrC:15013-15723 REVERSE	Leaf
Pg_S0219.18	protein.synthesis.ribosomal protein.prokaryotic.chloroplast.30S subunit.S30A	AT5G24490.1	AT5G24490.1 | Symbols: | 30S ribosomal protein, putative | chr5:8365690-8367178 FORWARD LENGTH=308	30S ribosomal protein, putative | chr5:8365601-8367460 FORWARD	Leaf
Pg_S2873.13	protein.synthesis.ribosomal protein.prokaryotic.chloroplast.30S subunit.S4	ATCG00380.1	ATCG00380.1 | Symbols: RPS4 | chloroplast ribosomal protein S4 | chrC:45223-45828 REVERSE LENGTH=201	Symbols: RPS4 | Chloroplast encoded ribosomal protein S4 | chrC:45223-45828 REVERSE	Leaf
Pg_S2476.14	protein.synthesis.ribosomal protein.prokaryotic.chloroplast.50S subunit.L13	AT1G78630.1	AT1G78630.1 | Symbols: emb1473 | Ribosomal protein L13 family protein | chr1:29575997-29577406 FORWARD LENGTH=241	Symbols: emb1473 | emb1473 (embryo defective 1473); structural constituent of ribosome | chr1:29575956-29577658 FORWARD	Leaf
Pg_S0390.12	protein.synthesis.ribosomal protein.prokaryotic.chloroplast.50S subunit.L14	ATCG00780.1	ATCG00780.1 | Symbols: RPL14 | ribosomal protein L14 | chrC:80696-81064 REVERSE LENGTH=122	Symbols: RPL14 | encodes a chloroplast ribosomal protein L14, a constituent of the large subunit of the ribosomal complex | chrC:80696-81064 REVERSE	Leaf
Pg_S3864.6	protein.synthesis.ribosomal protein.prokaryotic.chloroplast.50S subunit.L4	AT1G07320.1	AT1G07320.1 | Symbols: RPL4 | ribosomal protein L4 | chr1:2249190-2250189 FORWARD LENGTH=282	Symbols: RPL4 | RPL4; poly(U) binding / structural constituent of ribosome | chr1:2249133-2250529 FORWARD	Leaf
Pg_S8044.1	protein.synthesis.ribosomal protein.prokaryotic.chloroplast.50S subunit.L6	AT1G05190.1	AT1G05190.1 | Symbols: emb2394 | Ribosomal protein L6 family | chr1:1502515-1503738 REVERSE LENGTH=223	Symbols: emb2394 | emb2394 (embryo defective 2394); structural constituent of ribosome | chr1:1502344-1503830 REVERSE	Leaf
Pg_S1400.14	protein.synthesis.ribosomal protein.prokaryotic.unknown organellar.30S subunit.S1	AT5G30510.1	AT5G30510.1 | Symbols: RPS1, ARRPS1 | ribosomal protein S1 | chr5:11619262-11621223 REVERSE LENGTH=416	Symbols: RPS1, ARRPS1 | RPS1 (RIBOSOMAL PROTEIN S1); RNA binding / structural constituent of ribosome | chr5:11619026-11621298 REVERSE	Leaf
Pg_S5791.3	protein.synthesis.ribosomal protein.prokaryotic.unknown organellar.30S subunit.S1	AT1G71720.1	AT1G71720.1 | Symbols: | Nucleic acid-binding proteins superfamily | chr1:26983744-26985893 FORWARD LENGTH=500	S1 RNA-binding domain-containing protein | chr1:26983744-26985990 FORWARD	Leaf
Pg_S6131.1	protein.synthesis.ribosomal protein.prokaryotic.unknown organellar.50S subunit.L19	AT4G11630.1	AT4G11630.1 | Symbols: | Ribosomal protein L19 family protein | chr4:7019793-7021068 FORWARD LENGTH=225	ribosomal protein L19 family protein | chr4:7019700-7021348 FORWARD	Leaf
Pg_S3582.16	protein.synthesis.ribosomal protein.prokaryotic.unknown organellar.50S subunit.L28	AT4G31460.1	AT4G31460.1 | Symbols: | Ribosomal L28 family | chr4:15259773-15260847 REVERSE LENGTH=212	ribosomal protein L28 family protein | chr4:15259469-15261238 REVERSE	Leaf
Pg_S4675.11	protein.targeting.chloroplast	AT4G02510.1	AT4G02510.1 | Symbols: TOC159, TOC86, PPI2, TOC160, ATTOC159 | translocon at the outer envelope membrane of chloroplasts 159 | chr4:1104766-1109360 FORWARD LENGTH=1503	Symbols: TOC159, TOC86, PPI2, TOC160, ATTOC159 | TOC159 (TRANSLOCON AT THE OUTER ENVELOPE MEMBRANE OF CHLOROPLASTS 159); transmembrane receptor | chr4:1104766-1109600 FORWARD	Leaf
Pg_S2316.19	protein.targeting.chloroplast	AT2G28800.1	AT2G28800.1 | Symbols: ALB3 | 63 kDa inner membrane family protein | chr2:12356669-12359158 REVERSE LENGTH=462	Symbols: ALB3, ABL3 | ALB3 (ALBINO 3); P-P-bond-hydrolysis-driven protein transmembrane transporter | chr2:12356364-12359252 REVERSE	Leaf
Pg_S3429.18	protein.targeting.chloroplast	AT5G05000.2	AT5G05000.2 | Symbols: TOC34, ATTOC34, OEP34 | translocon at the outer envelope membrane of chloroplasts 34 | chr5:1474262-1475772 REVERSE LENGTH=313	Symbols: TOC34, ATTOC34, OEP34 | TOC34 (TRANSLOCON AT THE OUTER ENVELOPE MEMBRANE OF CHLOROPLASTS 34); GTP binding | chr5:1474113-1476019 REVERSE	Leaf
Pg_S7900.3	protein.targeting.chloroplast	AT2G18710.1	AT2G18710.1 | Symbols: SCY1 | SECY homolog 1 | chr2:8112231-8114452 REVERSE LENGTH=551	Symbols: SCY1 | SCY1 (SecY Homolog 1); P-P-bond-hydrolysis-driven protein transmembrane transporter | chr2:8112084-8114485 REVERSE	Leaf
Pg_S2498.31	protein.targeting.chloroplast	AT2G45770.2	AT2G45770.2 | Symbols: CPFTSY | signal recognition particle receptor protein, chloroplast (FTSY) | chr2:18851248-18853402 FORWARD LENGTH=373	Symbols: CPFTSY, FRD4 | CPFTSY; 7S RNA binding / GTP binding / nucleoside-triphosphatase/ nucleotide binding | chr2:18851218-18853709 FORWARD	Leaf
Pg_S0204.40	signalling.G-proteins	AT1G08410.1	AT1G08410.1 | Symbols: | P-loop containing nucleoside triphosphate hydrolases superfamily protein | chr1:2646307-2649106 FORWARD LENGTH=589	GTP-binding family protein | chr1:2646189-2649379 FORWARD	Leaf
Pg_S0276.3	cell.organisation	AT1G42550.1	AT1G42550.1 | Symbols: PMI1 | plastid movement impaired1 | chr1:15977131-15979734 FORWARD LENGTH=843	Symbols: PMI1 | PMI1 (PLASTID MOVEMENT IMPAIRED1) | chr1:15977014-15979952 FORWARD	Leaf
Pg_S2199.8	cell.organisation	AT2G46910.1	AT2G46910.1 | Symbols: | Plastid-lipid associated protein PAP / fibrillin family protein | chr2:19272427-19273856 FORWARD LENGTH=284	plastid-lipid associated protein PAP / fibrillin family protein | chr2:19272281-19274002 FORWARD	Leaf
Pg_S1051.9	cell.cycle.peptidylprolyl isomerase	AT4G33060.1	AT4G33060.1 | Symbols: | Cyclophilin-like peptidyl-prolyl cis-trans isomerase family protein | chr4:15948535-15951954 FORWARD LENGTH=504	peptidyl-prolyl cis-trans isomerase cyclophilin-type family protein | chr4:15948490-15952223 FORWARD	Leaf
Pg_S0273.9	cell.vesicle transport	AT1G50500.2	AT1G50500.2 | Symbols: HIT1 | Membrane trafficking VPS53 family protein | chr1:18708217-18715597 REVERSE LENGTH=847	Symbols: HIT1, ATVPS53, VPS53 | HIT1 (HEAT-INTOLERANT 1); transporter | chr1:18707987-18715977 REVERSE	Leaf
Pg_S0932.2	transport.ABC transporters and multidrug resistance systems	AT5G60790.1	AT5G60790.1 | Symbols: ATGCN1, GCN1 | ABC transporter family protein | chr5:24453760-24455767 REVERSE LENGTH=595	Symbols: ATGCN1, GCN1 | ATGCN1; transporter | chr5:24453258-24455970 REVERSE	Leaf
Pg_S1797.6	transport.ABC transporters and multidrug resistance systems	AT4G25450.1	AT4G25450.1 | Symbols: ATNAP8, NAP8 | non-intrinsic ABC protein 8 | chr4:13009845-13013912 REVERSE LENGTH=714	Symbols: ATNAP8, NAP8 | ATNAP8; ATPase, coupled to transmembrane movement of substances / transporter | chr4:13009733-13013971 REVERSE	Leaf
Pg_S5503.4	transport.peptides and oligopeptides	AT1G52190.1	AT1G52190.1 | Symbols: | Major facilitator superfamily protein | chr1:19434671-19438673 FORWARD LENGTH=607	proton-dependent oligopeptide transport (POT) family protein | chr1:19434509-19438971 FORWARD	Leaf
Pg_S8559.1	transport.phosphate	AT3G26570.1	AT3G26570.1 | Symbols: PHT2;1, ORF02 | phosphate transporter 2;1 | chr3:9756261-9758413 FORWARD LENGTH=613	Symbols: PHT2;1, ORF02 | PHT2;1 (PHOSPHATE TRANSPORTER 2;1); low affinity phosphate transmembrane transporter | chr3:9756225-9758633 FORWARD	Leaf
Pg_S0263.48	misc. other Ferredoxins and Rieske domain	AT4G25650.2	AT4G25650.2 | Symbols: ACD1-LIKE, PTC52, TIC55-IV | ACD1-like | chr4:13081021-13083153 REVERSE LENGTH=559	Symbols: ACD1-LIKE | ACD1-LIKE (ACD1-LIKE); 2 iron, 2 sulfur cluster binding / electron carrier/ oxidoreductase | chr4:13080901-13083197 REVERSE	Leaf
Pg_S1416.47	misc.aminotransferases.aminotransferase class IV family protein	AT5G27410.1	AT5G27410.1 | Symbols: | D-aminoacid aminotransferase-like PLP-dependent enzymes superfamily protein | chr5:9678821-9682468 FORWARD LENGTH=559	aminotransferase class IV family protein | chr5:9678666-9682940 FORWARD	Leaf
Pg_S8223.1	misc.GDSL-motif lipase	AT1G29660.1	AT1G29660.1 | Symbols: | GDSL-like Lipase/Acylhydrolase superfamily protein | chr1:10371955-10373624 FORWARD LENGTH=364	GDSL-motif lipase/hydrolase family protein | chr1:10371839-10373766 FORWARD	Leaf
Pg_S2762.10	misc.gluco-, galacto- and mannosidases.endoglucanase	AT4G02290.1	AT4G02290.1 | Symbols: AtGH9B13, GH9B13 | glycosyl hydrolase 9B13 | chr4:1002654-1005125 REVERSE LENGTH=516	Symbols: AtGH9B13 | AtGH9B13 (Arabidopsis thaliana glycosyl hydrolase 9B13); catalytic/ hydrolase, hydrolyzing O-glycosyl compounds | chr4:1002394-1005253 REVERSE	Leaf
Pg_S5955.2	misc.glutathione S transferases	AT3G55040.1	AT3G55040.1 | Symbols: GSTL2 | glutathione transferase lambda 2 | chr3:20398718-20400305 REVERSE LENGTH=292	Symbols: GSTL2 | GSTL2 | chr3:20398538-20400346 REVERSE	Leaf
Pg_S2779.3	misc.oxidases - copper, flavone etc.	AT1G23740.1	AT1G23740.1 | Symbols: | Oxidoreductase, zinc-binding dehydrogenase family protein | chr1:8398245-8399656 REVERSE LENGTH=386	oxidoreductase, zinc-binding dehydrogenase family protein | chr1:8398115-8399749 REVERSE	Leaf
Pg_S1468.16	misc.UDP glucosyl and glucoronyl transferases	AT2G23260.1	AT2G23260.1 | Symbols: UGT84B1 | UDP-glucosyl transferase 84B1 | chr2:9900046-9901416 REVERSE LENGTH=456	Symbols: UGT84B1 | UGT84B1 (UDP-glucosyl transferase 84B1); UDP-glycosyltransferase/ abscisic acid glucosyltransferase/ indole-3-acetate beta-glucosyltransferase/ quercetin 7-O-glucosyltransferase/ transferase, transferring glycosyl groups | chr2:9899927-9901439 REVERSE	Leaf
Pg_S0822.15	not assigned.no ontology	AT3G26780.1	AT3G26780.1 | Symbols: | Phosphoglycerate mutase family protein | chr3:9848747-9850277 FORWARD LENGTH=399	catalytic | chr3:9848628-9850472 FORWARD	Leaf
Pg_S5054.4	not assigned.no ontology	AT1G69680.1	AT1G69680.1 | Symbols: | Mog1/PsbP/DUF1795-like photosystem II reaction center PsbP family protein | chr1:26205148-26206568 FORWARD LENGTH=202	FUNCTIONS IN: molecular_function unknown; INVOLVED IN: biological_process unknown; LOCATED IN: cellular_component unknown; EXPRESSED IN: 24 plant structures; EXPRESSED DURING: 15 growth stages; CONTAINS InterPro DOMAIN/s: Mog1/PsbP/DUF1795, alpha/beta/alpha sandwich (InterPro:IPR016124), Ran-interacting Mog1 protein (InterPro:IPR007681), Mog1/PsbP, alpha/beta/alpha sandwich (InterPro:IPR016123); …	Leaf
Pg_S0799.1	not assigned.no ontology	AT1G50590.1	AT1G50590.1 | Symbols: | RmlC-like cupins superfamily protein | chr1:18732378-18734053 REVERSE LENGTH=310	pirin, putative | chr1:18732378-18734053 REVERSE	Leaf
Pg_S0302.45	not assigned.no ontology.hydroxyproline rich proteins	AT4G01050.1	AT4G01050.1 | Symbols: TROL | thylakoid rhodanese-like | chr4:455874-458175 FORWARD LENGTH=466	hydroxyproline-rich glycoprotein family protein | chr4:455768-458510 FORWARD	Leaf
Pg_S6003.4	not assigned.no ontology.pentatricopeptide (PPR) repeat-containing protein	AT1G12250.1	AT1G12250.1 | Symbols: | Pentapeptide repeat-containing protein | chr1:4159287-4161269 FORWARD LENGTH=280	thylakoid lumenal protein-related | chr1:4159265-4161455 FORWARD	Leaf
Pg_S8474.2	not assigned.unknown	AT5G55125.1	AT5G55125.1 | Symbols: | Ribosomal protein L31 | chr5:22372737-22372967 FORWARD LENGTH=76	unknown protein | chr5:22372020-22373209 FORWARD	Leaf
Pg_S1615.3	not assigned.unknown	AT4G26190.1	AT4G26190.1 | Symbols: | Haloacid dehalogenase-like hydrolase (HAD) superfamily protein | chr4:13262473-13266282 REVERSE LENGTH=1057	FUNCTIONS IN: molecular_function unknown; INVOLVED IN: biological_process unknown; LOCATED IN: cellular_component unknown; EXPRESSED IN: 23 plant structures; EXPRESSED DURING: 13 growth stages; CONTAINS InterPro DOMAIN/s: NLI interacting factor (InterPro:IPR004274); BEST Arabidopsis thaliana protein match is: unknown protein (TAIR:AT2G36550.1); Has 24148 Blast hits to 14674 proteins in 713 specie…	Leaf
Pg_S0849.23	not assigned.unknown	AT4G22890.1	AT4G22890.1 | Symbols: PGR5-LIKE A | PGR5-LIKE A | chr4:12007157-12009175 FORWARD LENGTH=324	Symbols: PGR5-LIKE A | PGR5-LIKE A | chr4:12006986-12009520 FORWARD	Leaf
Pg_S1945.16	not assigned.unknown	AT5G41950.1	AT5G41950.1 | Symbols: | Tetratricopeptide repeat (TPR)-like superfamily protein | chr5:16785825-16789360 FORWARD LENGTH=565	binding | chr5:16785714-16789514 FORWARD	Leaf
Pg_S1242.39	not assigned.unknown	AT3G01060.1	AT3G01060.1 | Symbols: | unknown protein; Has 640 Blast hits to 638 proteins in 201 species: Archae - 0; Bacteria - 293; Metazoa - 0; Fungi - 71; Plants - 72; Viruses - 0; Other Eukaryotes - 204 (source: NCBI BLink). | chr3:16831-18782 REVERSE LENGTH=455	unknown protein | chr3:16643-18840 REVERSE	Leaf
Pg_S5916.2	not assigned.unknown	AT1G15980.1	AT1G15980.1 | Symbols: NDF1, NDH48 | NDH-dependent cyclic electron flow 1 | chr1:5489314-5491199 FORWARD LENGTH=461	Symbols: NDF1 | NDF1 (NDH-DEPENDENT CYCLIC ELECTRON FLOW 1) | chr1:5489298-5491363 FORWARD	Leaf
Pg_S0072.6	not assigned.unknown	AT3G20680.1	AT3G20680.1 | Symbols: | Domain of unknown function (DUF1995) | chr3:7230147-7231163 REVERSE LENGTH=338	unknown protein | chr3:7230068-7231194 REVERSE	Leaf
Pg_S0637.3	not assigned.unknown	AT1G17850.2	AT1G17850.2 | Symbols: | Rhodanese/Cell cycle control phosphatase superfamily protein | chr1:6146470-6148820 REVERSE LENGTH=448	FUNCTIONS IN: molecular_function unknown; INVOLVED IN: biological_process unknown; LOCATED IN: chloroplast; EXPRESSED IN: 22 plant structures; EXPRESSED DURING: 13 growth stages; CONTAINS InterPro DOMAIN/s: Rhodanese-like (InterPro:IPR001763); BEST Arabidopsis thaliana protein match is: rhodanese-like domain-containing protein (TAIR:AT2G40760.1); Has 3833 Blast hits to 3832 proteins in 847 specie…	Leaf
Pg_S4131.8	not assigned.unknown	AT1G67230.1	AT1G67230.1 | Symbols: LINC1 | little nuclei1 | chr1:25151561-25156032 REVERSE LENGTH=1132	Symbols: LINC1 | LINC1 (LITTLE NUCLEI1) | chr1:25151270-25156323 REVERSE	Leaf
Pg_S0188.8	not assigned.unknown	AT3G26710.1	AT3G26710.1 | Symbols: CCB1 | cofactor assembly of complex C | chr3:9813550-9814606 FORWARD LENGTH=267	Symbols: CCB1 | CCB1 (COFACTOR ASSEMBLY OF COMPLEX C) | chr3:9813371-9814750 FORWARD	Leaf
Pg_S0662.26	not assigned.unknown	AT2G27260.1	AT2G27260.1 | Symbols: | Late embryogenesis abundant (LEA) hydroxyproline-rich glycoprotein family | chr2:11669769-11670500 FORWARD LENGTH=243	FUNCTIONS IN: molecular_function unknown; INVOLVED IN: biological_process unknown; LOCATED IN: cellular_component unknown; EXPRESSED IN: 24 plant structures; EXPRESSED DURING: 15 growth stages; CONTAINS InterPro DOMAIN/s: Harpin-induced 1 (InterPro:IPR010847); Has 584 Blast hits to 584 proteins in 25 species: Archae - 2; Bacteria - 0; Metazoa - 2; Fungi - 0; Plants - 578; Viruses - 0; Other Eukar…	Leaf
Pg_S6848.2	not assigned.unknown	AT1G16720.1	AT1G16720.1 | Symbols: HCF173 | high chlorophyll fluorescence phenotype 173 | chr1:5723161-5726248 FORWARD LENGTH=598	Symbols: HCF173 | HCF173 (high chlorophyll fluorescence phenotype 173); binding / catalytic/ transcription repressor | chr1:5723088-5726478 FORWARD	Leaf
Pg_S1185.56	not assigned.unknown	AT5G42150.1	AT5G42150.1 | Symbols: | Glutathione S-transferase family protein | chr5:16846247-16847909 FORWARD LENGTH=315	electron carrier/ protein disulfide oxidoreductase | chr5:16846150-16848279 FORWARD	Leaf
Pg_S7416.4	not assigned.unknown	AT1G06190.1	AT1G06190.1 | Symbols: | Rho termination factor | chr1:1892467-1894078 REVERSE LENGTH=401	ATP binding / ATPase, coupled to transmembrane movement of ions, phosphorylative mechanism | chr1:1892273-1894148 REVERSE	Leaf
Pg_S0291.5	metal handling	AT4G14030.1	AT4G14030.1 | Symbols: SBP1 | selenium-binding protein 1 | chr4:8098121-8100165 REVERSE LENGTH=490	Symbols: SBP1 | SBP1 (selenium-binding protein 1); selenium binding | chr4:8097918-8100242 REVERSE	Root
Pg_S3551.2	stress.biotic	AT1G70830.1	AT1G70830.1 | Symbols: MLP28 | MLP-like protein 28 | chr1:26710203-26711395 REVERSE LENGTH=335	Symbols: MLP28 | MLP28 (MLP-LIKE PROTEIN 28) | chr1:26709947-26711462 REVERSE	Root
Pg_S8354.4	stress.biotic.PR-proteins	AT5G49040.1	AT5G49040.1 | Symbols: | Disease resistance-responsive (dirigent-like protein) family protein | chr5:19882676-19883251 REVERSE LENGTH=191	disease resistance-responsive protein-related / dirigent protein-related | chr5:19882676-19883251 REVERSE	Root
Pg_S1047.4	stress.biotic.PR-proteins	AT5G24090.1	AT5G24090.1 | Symbols: ATCHIA, CHIA | chitinase A | chr5:8143805-8145153 REVERSE LENGTH=302	acidic endochitinase (CHIB1) | chr5:8143699-8145252 REVERSE	Root
Pg_S1240.46	stress.biotic.PR-proteins	AT1G33590.1	AT1G33590.1 | Symbols: | Leucine-rich repeat (LRR) family protein | chr1:12177788-12179221 FORWARD LENGTH=477	disease resistance protein-related / LRR protein-related | chr1:12177777-12179413 FORWARD	Root
Pg_S3551.2	stress.abiotic.unspecified	AT1G70830.1	AT1G70830.1 | Symbols: MLP28 | MLP-like protein 28 | chr1:26710203-26711395 REVERSE LENGTH=335	Symbols: MLP28 | MLP28 (MLP-LIKE PROTEIN 28) | chr1:26709947-26711462 REVERSE	Root
Pg_S0575.47	redox.ascorbate and glutathione.ascorbate	AT1G07890.3	AT1G07890.3 | Symbols: APX1, MEE6, CS1, ATAPX1, ATAPX01 | ascorbate peroxidase 1 | chr1:2438005-2439435 FORWARD LENGTH=250	Symbols: APX1, CS1 | APX1 (ascorbate peroxidase 1); L-ascorbate peroxidase | chr1:2437725-2439665 FORWARD	Root
Pg_S1566.14	redox.peroxiredoxin	AT3G06050.1	AT3G06050.1 | Symbols: PRXIIF, ATPRXIIF | peroxiredoxin IIF | chr3:1826311-1827809 REVERSE LENGTH=201	Symbols: PRXIIF, ATPRXIIF | PRXIIF (PEROXIREDOXIN IIF); antioxidant/ peroxidase | chr3:1826073-1827861 REVERSE	Root
Pg_S8361.1	RNA.processing.ribonucleases	AT2G02990.1	AT2G02990.1 | Symbols: RNS1, ATRNS1 | ribonuclease 1 | chr2:873714-874667 FORWARD LENGTH=230	Symbols: RNS1, ATRNS1 | RNS1 (RIBONUCLEASE 1); endoribonuclease/ ribonuclease | chr2:873506-874811 FORWARD	Root
Pg_S3055.11	protein.targeting.secretory pathway.vacuole	AT2G05170.1	AT2G05170.1 | Symbols: ATVPS11, VPS11 | vacuolar protein sorting 11 | chr2:1870020-1873278 FORWARD LENGTH=932	Symbols: ATVPS11 | ATVPS11; binding / protein binding / transporter/ zinc ion binding | chr2:1869877-1873812 FORWARD	Root
Pg_S4022.6	protein.degradation	AT5G19740.1	AT5G19740.1 | Symbols: | Peptidase M28 family protein | chr5:6673986-6676767 FORWARD LENGTH=681	peptidase M28 family protein | chr5:6673933-6676859 FORWARD	Root
Pg_S1016.1	protein.degradation.subtilases	AT5G67360.1	AT5G67360.1 | Symbols: ARA12 | Subtilase family protein | chr5:26872192-26874465 REVERSE LENGTH=757	Symbols: ARA12 | ARA12; serine-type endopeptidase | chr5:26871891-26874579 REVERSE	Root
Pg_S6716.1	protein.degradation.subtilases	AT4G15040.1	AT4G15040.1 | Symbols: | Subtilisin-like serine endopeptidase family protein | chr4:8581373-8584122 REVERSE LENGTH=687	identical protein binding / serine-type endopeptidase | chr4:8581373-8584122 REVERSE	Root
Pg_S1566.18	protein.degradation.aspartate protease	AT1G25510.1	AT1G25510.1 | Symbols: | Eukaryotic aspartyl protease family protein | chr1:8959372-8960823 REVERSE LENGTH=483	aspartyl protease family protein | chr1:8959186-8960848 REVERSE	Root
Pg_S4250.13	protein.degradation.cysteine protease	AT2G21430.1	AT2G21430.1 | Symbols: | Papain family cysteine protease | chr2:9171964-9173301 REVERSE LENGTH=361	cysteine proteinase A494, putative / thiol protease, putative | chr2:9171885-9173339 REVERSE	Root
Pg_S2513.2	protein.degradation.cysteine protease	AT1G02305.1	AT1G02305.1 | Symbols: | Cysteine proteinases superfamily protein | chr1:455816-457974 FORWARD LENGTH=362	cathepsin B-like cysteine protease, putative | chr1:455688-458164 FORWARD	Root
Pg_S6113.2	protein.degradation.serine protease	AT3G63470.1	AT3G63470.1 | Symbols: scpl40 | serine carboxypeptidase-like 40 | chr3:23438561-23440862 FORWARD LENGTH=502	Symbols: scpl40 | scpl40 (serine carboxypeptidase-like 40); serine-type carboxypeptidase | chr3:23438474-23441060 FORWARD	Root
Pg_S2941.6	cell.vesicle transport	AT5G16880.1	AT5G16880.1 | Symbols: | Target of Myb protein 1 | chr5:5549658-5551274 FORWARD LENGTH=407	VHS domain-containing protein / GAT domain-containing protein | chr5:5548914-5551463 FORWARD	Root
Pg_S2835.18	development.unspecified	AT1G70670.1	AT1G70670.1 | Symbols: | Caleosin-related family protein | chr1:26644830-26645970 FORWARD LENGTH=195	caleosin-related family protein | chr1:26644582-26646173 FORWARD	Root
Pg_S6968.5	transport.Major Intrinsic Proteins.PIP	AT2G37170.1	AT2G37170.1 | Symbols: PIP2B, PIP2;2 | plasma membrane intrinsic protein 2 | chr2:15613624-15614791 REVERSE LENGTH=285	Symbols: PIP2B, PIP2;2 | PIP2B (PLASMA MEMBRANE INTRINSIC PROTEIN 2); water channel | chr2:15613402-15614857 REVERSE	Root
Pg_S2073.16	transport.metabolite transporters at the envelope membrane	AT1G61800.1	AT1G61800.1 | Symbols: GPT2, ATGPT2 | glucose-6-phosphate/phosphate translocator 2 | chr1:22824527-22826459 FORWARD LENGTH=388	Symbols: GPT2 | GPT2; antiporter/ glucose-6-phosphate transmembrane transporter | chr1:22824440-22826774 FORWARD	Root
Pg_S2692.16	transport.misc	AT1G80300.1	AT1G80300.1 | Symbols: NTT1, ATNTT1 | nucleotide transporter 1 | chr1:30191954-30194280 FORWARD LENGTH=624	Symbols: NTT1, ATNTT1 | NTT1 (NUCLEOTIDE TRANSPORTER 1); ATP:ADP antiporter | chr1:30191856-30194519 FORWARD	Root
Pg_S5191.2	transporter.sugars	AT4G35300.1	AT4G35300.1 | Symbols: TMT2 | tonoplast monosaccharide transporter2 | chr4:16796432-16799071 REVERSE LENGTH=739	Symbols: TMT2 | TMT2 (TONOPLAST MONOSACCHARIDE TRANSPORTER2); carbohydrate transmembrane transporter/ nucleoside transmembrane transporter/ sugar:hydrogen symporter | chr4:16796256-16799553 REVERSE	Root
Pg_S2207.36	misc.acid and other phosphatases	AT2G27190.1	AT2G27190.1 | Symbols: PAP1, ATPAP1, PAP12, ATPAP12 | purple acid phosphatase 12 | chr2:11621400-11623438 REVERSE LENGTH=469	Symbols: PAP1, ATPAP1, PAP12, ATPAP12 | PAP12 (PURPLE ACID PHOSPHATASE 12); acid phosphatase/ protein serine/threonine phosphatase | chr2:11621222-11623618 REVERSE	Root
Pg_S1847.13	misc.cytochrome P450	AT5G63450.1	AT5G63450.1 | Symbols: CYP94B1 | cytochrome P450, family 94, subfamily B, polypeptide 1 | chr5:25408987-25410519 REVERSE LENGTH=510	Symbols: CYP94B1 | CYP94B1; electron carrier/ heme binding / iron ion binding / monooxygenase/ oxygen binding | chr5:25408895-25410573 REVERSE	Root
Pg_S1058.12	misc.cytochrome P450	AT3G48280.1	AT3G48280.1 | Symbols: CYP71A25 | cytochrome P450, family 71, subfamily A, polypeptide 25 | chr3:17879594-17881164 FORWARD LENGTH=490	Symbols: CYP71A25 | CYP71A25; electron carrier/ heme binding / iron ion binding / monooxygenase/ oxygen binding | chr3:17879566-17881312 FORWARD	Root
Pg_S1972.1	misc.cytochrome P450	AT5G25140.1	AT5G25140.1 | Symbols: CYP71B13 | cytochrome P450, family 71, subfamily B, polypeptide 13 | chr5:8672989-8674557 FORWARD LENGTH=496	Symbols: CYP71B13 | CYP71B13; electron carrier/ heme binding / iron ion binding / monooxygenase/ oxygen binding | chr5:8672424-8674629 FORWARD	Root
Pg_S3108.1	misc.GDSL-motif lipase	AT1G29660.1	AT1G29660.1 | Symbols: | GDSL-like Lipase/Acylhydrolase superfamily protein | chr1:10371955-10373624 FORWARD LENGTH=364	GDSL-motif lipase/hydrolase family protein | chr1:10371839-10373766 FORWARD	Root
Pg_S1766.3	misc.GDSL-motif lipase	AT1G53920.1	AT1G53920.1 | Symbols: GLIP5 | GDSL-motif lipase 5 | chr1:20137725-20139637 FORWARD LENGTH=385	Symbols: GLIP5 | GLIP5; carboxylesterase/ lipase | chr1:20137712-20139637 FORWARD	Root
Pg_S7055.3	misc.GDSL-motif lipase	AT5G62930.1	AT5G62930.1 | Symbols: | SGNH hydrolase-type esterase superfamily protein | chr5:25254912-25256357 FORWARD LENGTH=242	GDSL-motif lipase/hydrolase family protein | chr5:25254888-25256617 FORWARD	Root
Pg_S0624.15	misc.gluco-, galacto- and mannosidases.beta-galactosidase	AT4G36360.1	AT4G36360.1 | Symbols: BGAL3 | beta-galactosidase 3 | chr4:17176840-17181143 REVERSE LENGTH=856	Symbols: BGAL3 | BGAL3 (beta-galactosidase 3); beta-galactosidase/ catalytic/ cation binding / sugar binding | chr4:17176342-17181261 REVERSE	Root
Pg_S1362.3	misc.gluco-, galacto- and mannosidases.endoglucanase	AT1G71380.1	AT1G71380.1 | Symbols: ATGH9B3, ATCEL3, CEL3 | cellulase 3 | chr1:26899989-26901749 REVERSE LENGTH=484	Symbols: ATGH9B3, ATCEL3 | ATCEL3 (ARABIDOPSIS THALIANA CELLULASE 3); catalytic/ hydrolase, hydrolyzing O-glycosyl compounds | chr1:26899784-26901789 REVERSE	Root
Pg_S0358.22	misc.misc2	AT3G56460.1	AT3G56460.1 | Symbols: | GroES-like zinc-binding alcohol dehydrogenase family protein | chr3:20933029-20934425 REVERSE LENGTH=348	oxidoreductase, zinc-binding dehydrogenase family protein | chr3:20932791-20934540 REVERSE	Root
Pg_S1122.11	misc.myrosinases-lectin-jacalin	AT1G78830.1	AT1G78830.1 | Symbols: | Curculin-like (mannose-binding) lectin family protein | chr1:29637141-29638508 REVERSE LENGTH=455	curculin-like (mannose-binding) lectin family protein | chr1:29636955-29638552 REVERSE	Root
Pg_S3787.4	misc.nitrilases, *nitrile lyases, berberine bridge enzymes, reticuline oxidases, troponine reductases	AT4G20840.1	AT4G20840.1 | Symbols: | FAD-binding Berberine family protein | chr4:11157916-11159535 FORWARD LENGTH=539	FAD-binding domain-containing protein | chr4:11157916-11159535 FORWARD	Root
Pg_S2674.4	misc.nitrilases, *nitrile lyases, berberine bridge enzymes, reticuline oxidases, troponine reductases	AT5G13690.1	AT5G13690.1 | Symbols: CYL1, NAGLU | alpha-N-acetylglucosaminidase family / NAGLU family | chr5:4415808-4420159 FORWARD LENGTH=806	alpha-N-acetylglucosaminidase family / NAGLU family | chr5:4415754-4420371 FORWARD	Root
Pg_S0835.7	misc.oxidases - copper, flavone etc.	AT1G23010.1	AT1G23010.1 | Symbols: LPR1 | Cupredoxin superfamily protein | chr1:8147353-8149580 FORWARD LENGTH=581	Symbols: LPR1 | LPR1 (Low Phosphate Root1); copper ion binding / oxidoreductase, acting on diphenols and related substances as donors, oxygen as acceptor | chr1:8147264-8149813 FORWARD	Root
Pg_S5101.11	misc.peroxidases	AT4G33420.1	AT4G33420.1 | Symbols: | Peroxidase superfamily protein | chr4:16084856-16086105 FORWARD LENGTH=325	peroxidase, putative | chr4:16084828-16086296 FORWARD	Root
Pg_S1106.49	misc.UDP glucosyl and glucoronyl transferases	AT4G34131.1	AT4G34131.1 | Symbols: UGT73B3 | UDP-glucosyl transferase 73B3 | chr4:16343268-16344713 REVERSE LENGTH=481	Symbols: UGT73B3 | UGT73B3 (UDP-glucosyl transferase 73B3); UDP-glycosyltransferase/ abscisic acid glucosyltransferase/ quercetin 3-O-glucosyltransferase/ transferase, transferring hexosyl groups | chr4:16343057-16344818 REVERSE	Root
Pg_S0710.9	not assigned.no ontology	AT4G34480.1	AT4G34480.1 | Symbols: | O-Glycosyl hydrolases family 17 protein | chr4:16481147-16483988 REVERSE LENGTH=504	catalytic/ cation binding / hydrolase, hydrolyzing O-glycosyl compounds | chr4:16480934-16483995 REVERSE	Root
Pg_S3489.1	not assigned.no ontology	AT1G71950.1	AT1G71950.1 | Symbols: | Proteinase inhibitor, propeptide | chr1:27080453-27081573 REVERSE LENGTH=136	identical protein binding / serine-type endopeptidase | chr1:27080184-27081613 REVERSE	Root
Pg_S0302.40	not assigned.no ontology	AT3G05500.1	AT3G05500.1 | Symbols: | Rubber elongation factor protein (REF) | chr3:1593540-1594802 FORWARD LENGTH=246	rubber elongation factor (REF) family protein | chr3:1593434-1595015 FORWARD	Root
Pg_S1913.17	not assigned.no ontology	AT3G50440.1	AT3G50440.1 | Symbols: ATMES10, MES10 | methyl esterase 10 | chr3:18717392-18718435 REVERSE LENGTH=288	Symbols: ATMES10, MES10 | MES10 (METHYL ESTERASE 10); hydrolase/ hydrolase, acting on ester bonds / methyl jasmonate esterase | chr3:18717311-18718494 REVERSE	Root
Pg_S5400.12	not assigned.unknown	AT5G48540.1	AT5G48540.1 | Symbols: | receptor-like protein kinase-related family protein | chr5:19669096-19669887 REVERSE LENGTH=263	33 kDa secretory protein-related | chr5:19668964-19669920 REVERSE	Root
Pg_S1205.25	not assigned.unknown	AT2G43180.1	AT2G43180.1 | Symbols: | Phosphoenolpyruvate carboxylase family protein | chr2:17953719-17955774 REVERSE LENGTH=479	catalytic | chr2:17953497-17955829 REVERSE	Root
Pg_S0244.37	not assigned.unknown	AT3G12940.1	AT3G12940.1 | Symbols: | 2-oxoglutarate (2OG) and Fe(II)-dependent oxygenase superfamily protein | chr3:4130242-4131912 REVERSE LENGTH=474	unknown protein | chr3:4130007-4132467 REVERSE	Root
Pg_S0139.1	not assigned.unknown	AT2G44260.2	AT2G44260.2 | Symbols: | Plant protein of unknown function (DUF946) | chr2:18295988-18297739 FORWARD LENGTH=583	unknown protein | chr2:18295838-18297867 FORWARD	Root
Pg_S1199.9	not assigned.unknown	AT5G42150.1	AT5G42150.1 | Symbols: | Glutathione S-transferase family protein | chr5:16846247-16847909 FORWARD LENGTH=315	electron carrier/ protein disulfide oxidoreductase | chr5:16846150-16848279 FORWARD	Root
Pg_S3518.16	metal handling.binding, chelation and storage	AT2G36880.1	AT2G36880.1 | Symbols: MAT3 | methionine adenosyltransferase 3 | chr2:15479721-15480893 REVERSE LENGTH=390	Symbols: MAT3 | MAT3 (methionine adenosyltransferase 3); copper ion binding / methionine adenosyltransferase | chr2:15479366-15481412 REVERSE	Shoot
Pg_S2381.6	hormone metabolism.brassinosteroid.synthesis-degradation.BRs.DET2	AT2G16530.1	AT2G16530.1 | Symbols: | 3-oxo-5-alpha-steroid 4-dehydrogenase family protein | chr2:7163276-7165064 REVERSE LENGTH=343	3-oxo-5-alpha-steroid 4-dehydrogenase family protein / steroid 5-alpha-reductase family protein | chr2:7162989-7165323 REVERSE	Shoot
Pg_S1744.3	stress.abiotic.unspecified	AT1G70890.1	AT1G70890.1 | Symbols: MLP43 | MLP-like protein 43 | chr1:26725912-26726489 REVERSE LENGTH=158	Symbols: MLP43 | MLP43 (MLP-LIKE PROTEIN 43) | chr1:26725626-26726544 REVERSE	Shoot
Pg_S1425.7	protein.synthesis.ribosomal protein.eukaryotic.40S subunit.S4	AT5G58420.1	AT5G58420.1 | Symbols: | Ribosomal protein S4 (RPS4A) family protein | chr5:23619599-23620896 FORWARD LENGTH=262	40S ribosomal protein S4 (RPS4D) | chr5:23619506-23621094 FORWARD	Shoot
Pg_S5806.2	protein.targeting.secretory pathway.vacuole	AT2G14740.1	AT2G14740.1 | Symbols: ATVSR3, VSR3, VSR2;2, BP80-2;2 | vaculolar sorting receptor 3 | chr2:6308895-6312303 FORWARD LENGTH=628	Symbols: ATVSR3 | ATVSR3 (ARABIDOPSIS THALIANA VACULOLAR SORTING RECEPTOR 3); calcium ion binding | chr2:6308895-6312589 FORWARD	Shoot
Pg_S3887.10	protein.degradation.ubiquitin.E3.RING	AT5G14420.1	AT5G14420.1 | Symbols: RGLG2 | RING domain ligase2 | chr5:4648355-4650563 REVERSE LENGTH=468	Symbols: RGLG2 | RGLG2 (RING domain Ligase2); ubiquitin-protein ligase | chr5:4648111-4650698 REVERSE	Shoot
Pg_S3452.8	signalling.receptor kinases	AT4G35470.1	AT4G35470.1 | Symbols: PIRL4 | plant intracellular ras group-related LRR 4 | chr4:16846531-16848448 FORWARD LENGTH=549	leucine-rich repeat family protein | chr4:16846301-16849150 FORWARD	Shoot
Pg_S3414.4	signalling.calcium	AT1G19870.1	AT1G19870.1 | Symbols: iqd32 | IQ-domain 32 | chr1:6895400-6898539 REVERSE LENGTH=794	Symbols: iqd32 | iqd32 (IQ-domain 32); calmodulin binding | chr1:6895015-6898725 REVERSE	Shoot
Pg_S1784.4	signalling.G-proteins	AT5G19320.1	AT5G19320.1 | Symbols: RANGAP2 | RAN GTPase activating protein 2 | chr5:6505310-6506947 REVERSE LENGTH=545	Symbols: RANGAP2 | RANGAP2 (RAN GTPASE ACTIVATING PROTEIN 2); RAN GTPase activator | chr5:6505110-6507435 REVERSE	Shoot
Pg_S4680.6	signalling.light	AT3G45780.1	AT3G45780.1 | Symbols: PHOT1, NPH1, JK224, RPT1 | phototropin 1 | chr3:16818557-16823960 FORWARD LENGTH=996	Symbols: PHOT1, NPH1, JK224, RPT1 | PHOT1 (PHOTOTROPIN 1); FMN binding / blue light photoreceptor/ kinase/ protein binding / protein serine/threonine kinase | chr3:16816866-16824210 FORWARD	Shoot
Pg_S2708.21	signalling.light	AT4G31820.1	AT4G31820.1 | Symbols: ENP, NPY1, MAB4 | Phototropic-responsive NPH3 family protein | chr4:15390788-15393627 REVERSE LENGTH=571	Symbols: ENP, NPY1, MAB4 | ENP (ENHANCER OF PINOID); protein binding / signal transducer | chr4:15390650-15394430 REVERSE	Shoot
Pg_S7486.3	cell.organisation	AT4G27430.1	AT4G27430.1 | Symbols: CIP7 | COP1-interacting protein 7 | chr4:13718817-13722736 FORWARD LENGTH=1058	Symbols: CIP7 | CIP7 (COP1-INTERACTING PROTEIN 7); transcription activator | chr4:13718679-13723047 FORWARD	Shoot
Pg_S2396.18	cell.organisation	AT1G71440.1	AT1G71440.1 | Symbols: PFI, TFC E | tubulin folding cofactor E / Pfifferling (PFI) | chr1:26921271-26924373 REVERSE LENGTH=531	Symbols: PFI, TFC E | PFI (PFIFFERLING) | chr1:26921060-26924386 REVERSE	Shoot
Pg_S4553.1	cell.organisation	AT3G19960.2	AT3G19960.2 | Symbols: ATM1 | myosin 1 | chr3:6949787-6956736 FORWARD LENGTH=1176	Symbols: ATM1 | ATM1 (ARABIDOPSIS THALIANA MYOSIN 1); motor | chr3:6948776-6956966 FORWARD	Shoot
Pg_S4883.11	cell.cycle.peptidylprolyl isomerase	AT4G33060.1	AT4G33060.1 | Symbols: | Cyclophilin-like peptidyl-prolyl cis-trans isomerase family protein | chr4:15948535-15951954 FORWARD LENGTH=504	peptidyl-prolyl cis-trans isomerase cyclophilin-type family protein | chr4:15948490-15952223 FORWARD	Shoot
Pg_S5398.15	cell.vesicle transport	AT4G21450.3	AT4G21450.3 | Symbols: | PapD-like superfamily protein | chr4:11426136-11428125 FORWARD LENGTH=314	vesicle-associated membrane family protein / VAMP family protein | chr4:11425999-11428345 FORWARD	Shoot
Pg_S0524.17	cell.vesicle transport	AT1G08190.1	AT1G08190.1 | Symbols: ATVPS41, ZIP2, VPS41, ATVAM2, VAM2 | vacuolar protein sorting 41 | chr1:2567652-2573142 FORWARD LENGTH=980	vacuolar assembly protein, putative (VPS41) | chr1:2567502-2573393 FORWARD	Shoot
Pg_S5052.8	transport.ABC transporters and multidrug resistance systems	AT5G02270.2	AT5G02270.2 | Symbols: NAP9 | non-intrinsic ABC protein 9 | chr5:467269-469041 REVERSE LENGTH=354	Symbols: ATNAP9, NAP9 | ATNAP9; transporter | chr5:467108-469080 REVERSE	Shoot
Pg_S3584.5	transport.Major Intrinsic Proteins.PIP	AT4G35100.1	AT4G35100.1 | Symbols: PIP3, PIP3A, PIP2;7, SIMIP | plasma membrane intrinsic protein 3 | chr4:16708672-16709958 FORWARD LENGTH=280	Symbols: PIP3, PIP3A, PIP2;7, SIMIP | PIP3 (PLASMA MEMBRANE INTRINSIC PROTEIN 3); water channel | chr4:16708598-16710248 FORWARD	Shoot
Pg_S2773.6	transport.misc	AT5G65980.1	AT5G65980.1 | Symbols: | Auxin efflux carrier family protein | chr5:26392444-26394232 FORWARD LENGTH=395	auxin efflux carrier family protein | chr5:26392444-26394232 FORWARD	Shoot
Pg_S2478.3	transport.misc	AT3G46450.2	AT3G46450.2 | Symbols: | SEC14 cytosolic factor family protein / phosphoglyceride transfer family protein | chr3:17093297-17095319 REVERSE LENGTH=494	SEC14 cytosolic factor family protein / phosphoglyceride transfer family protein | chr3:17092938-17095639 REVERSE	Shoot
Pg_S8532.1	transport.misc	AT1G72160.1	AT1G72160.1 | Symbols: | Sec14p-like phosphatidylinositol transfer family protein | chr1:27153823-27155609 REVERSE LENGTH=490	SEC14 cytosolic factor family protein / phosphoglyceride transfer family protein | chr1:27153581-27155664 REVERSE	Shoot
Pg_S4590.19	misc.misc2	AT3G56460.1	AT3G56460.1 | Symbols: | GroES-like zinc-binding alcohol dehydrogenase family protein | chr3:20933029-20934425 REVERSE LENGTH=348	oxidoreductase, zinc-binding dehydrogenase family protein | chr3:20932791-20934540 REVERSE	Shoot
Pg_S2403.11	misc.cytochrome P450	AT1G24540.1	AT1G24540.1 | Symbols: CYP86C1 | cytochrome P450, family 86, subfamily C, polypeptide 1 | chr1:8699751-8701319 FORWARD LENGTH=522	Symbols: CYP86C1 | CYP86C1; electron carrier/ heme binding / iron ion binding / monooxygenase/ oxygen binding | chr1:8699751-8701421 FORWARD	Shoot
Pg_S6822.2	misc.cytochrome P450	AT3G48280.1	AT3G48280.1 | Symbols: CYP71A25 | cytochrome P450, family 71, subfamily A, polypeptide 25 | chr3:17879594-17881164 FORWARD LENGTH=490	Symbols: CYP71A25 | CYP71A25; electron carrier/ heme binding / iron ion binding / monooxygenase/ oxygen binding | chr3:17879566-17881312 FORWARD	Shoot
Pg_S4601.14	misc.gluco-, galacto- and mannosidases.beta-galactosidase	AT4G36360.1	AT4G36360.1 | Symbols: BGAL3 | beta-galactosidase 3 | chr4:17176840-17181143 REVERSE LENGTH=856	Symbols: BGAL3 | BGAL3 (beta-galactosidase 3); beta-galactosidase/ catalytic/ cation binding / sugar binding | chr4:17176342-17181261 REVERSE	Shoot
Pg_S0708.6	misc.nitrilases, *nitrile lyases, berberine bridge enzymes, reticuline oxidases, troponine reductases	AT4G20840.1	AT4G20840.1 | Symbols: | FAD-binding Berberine family protein | chr4:11157916-11159535 FORWARD LENGTH=539	FAD-binding domain-containing protein | chr4:11157916-11159535 FORWARD	Shoot
Pg_S4429.8	not assigned.unknown	AT4G32330.1	AT4G32330.1 | Symbols: | TPX2 (targeting protein for Xklp2) protein family | chr4:15609801-15611867 FORWARD LENGTH=437	FUNCTIONS IN: molecular_function unknown; INVOLVED IN: biological_process unknown; LOCATED IN: cellular_component unknown; EXPRESSED IN: 23 plant structures; EXPRESSED DURING: 13 growth stages; CONTAINS InterPro DOMAIN/s: Targeting for Xklp2 (InterPro:IPR009675); BEST Arabidopsis thaliana protein match is: unknown protein (TAIR:AT2G25480.1); Has 4728 Blast hits to 3313 proteins in 331 species: Ar…	Shoot
Pg_S7964.2	not assigned.unknown	AT2G20760.1	AT2G20760.1 | Symbols: | Clathrin light chain protein | chr2:8943279-8945108 REVERSE LENGTH=338	protein binding / structural molecule | chr2:8942763-8945244 REVERSE	Shoot
Pg_S3733.15	not assigned.unknown	AT5G41950.1	AT5G41950.1 | Symbols: | Tetratricopeptide repeat (TPR)-like superfamily protein | chr5:16785825-16789360 FORWARD LENGTH=565	binding | chr5:16785714-16789514 FORWARD	Shoot
Pg_S2929.1	not assigned.unknown	AT3G12940.1	AT3G12940.1 | Symbols: | 2-oxoglutarate (2OG) and Fe(II)-dependent oxygenase superfamily protein | chr3:4130242-4131912 REVERSE LENGTH=474	unknown protein | chr3:4130007-4132467 REVERSE	Shoot
Pg_S6477.1	not assigned.unknown	AT2G27260.1	AT2G27260.1 | Symbols: | Late embryogenesis abundant (LEA) hydroxyproline-rich glycoprotein family | chr2:11669769-11670500 FORWARD LENGTH=243	FUNCTIONS IN: molecular_function unknown; INVOLVED IN: biological_process unknown; LOCATED IN: cellular_component unknown; EXPRESSED IN: 24 plant structures; EXPRESSED DURING: 15 growth stages; CONTAINS InterPro DOMAIN/s: Harpin-induced 1 (InterPro:IPR010847); Has 584 Blast hits to 584 proteins in 25 species: Archae - 2; Bacteria - 0; Metazoa - 2; Fungi - 0; Plants - 578; Viruses - 0; Other Eukar…	Shoot

## Sheet: Metabolism overview
Table 2. Metabolism overview of proteins specific to fruit, leaf, root, and shoot using MapMan software
Ginseng ID	BinName	[TAIR10]	[TAIR10] Description	MapMan Description	Tissue
Pg_S5391.1	fermentation.aldehyde dehydrogenase	AT3G24503.1	AT3G24503.1 | Symbols: ALDH2C4, ALDH1A, REF1 | aldehyde dehydrogenase 2C4 | chr3:8919732-8923029 REVERSE LENGTH=501	Symbols: ALDH2C4, ALDH1A, REF1 | ALDH2C4; 3-chloroallyl aldehyde dehydrogenase/ aldehyde dehydrogenase (NAD)/ coniferyl-aldehyde dehydrogenase | chr3:8919560-8923073 REVERSE	Fruit
Pg_S4765.13	gluconeogenese/ glyoxylate cycle.pyruvate dikinase	AT4G15530.5	AT4G15530.5 | Symbols: PPDK | pyruvate orthophosphate dikinase | chr4:8864828-8870748 REVERSE LENGTH=963	Symbols: PPDK | PPDK (pyruvate orthophosphate dikinase); kinase/ pyruvate, phosphate dikinase | chr4:8864828-8870801 REVERSE	Fruit
Pg_S3920.2	glycolysis.cytosolic branch.phosphoglycerate mutase	AT3G08590.1	AT3G08590.1 | Symbols: | Phosphoglycerate mutase, 2,3-bisphosphoglycerate-independent | chr3:2608683-2611237 REVERSE LENGTH=560	2,3-biphosphoglycerate-independent phosphoglycerate mutase, putative / phosphoglyceromutase, putative | chr3:2608471-2611418 REVERSE	Fruit
Pg_S1997.3	lipid metabolism.FA synthesis and FA elongation.ACP desaturase	AT2G43710.2	AT2G43710.2 | Symbols: SSI2, FAB2 | Plant stearoyl-acyl-carrier-protein desaturase family protein | chr2:18120107-18122495 FORWARD LENGTH=401	Symbols: SSI2, FAB2 | SSI2; acyl-[acyl-carrier-protein] desaturase/ stearoyl-CoA 9-desaturase | chr2:18119962-18122889 FORWARD	Fruit
Pg_S5890.6	lipid metabolism.FA synthesis and FA elongation.ketoacyl ACP synthase	AT5G46290.3	AT5G46290.3 | Symbols: KASI | 3-ketoacyl-acyl carrier protein synthase I | chr5:18774439-18776629 REVERSE LENGTH=489	Symbols: KAS I | KAS I (3-KETOACYL-ACYL CARRIER PROTEIN SYNTHASE I); catalytic/ fatty-acid synthase/ transferase, transferring acyl groups other than amino-acyl groups | chr5:18774086-18776735 REVERSE	Fruit
Pg_S5778.5	lipid metabolism.TAG synthesis	AT3G18570.1	AT3G18570.1 | Symbols: | Oleosin family protein | chr3:6396072-6396572 REVERSE LENGTH=166	glycine-rich protein / oleosin | chr3:6395860-6396606 REVERSE	Fruit
Pg_S1347.13	major CHO metabolism.degradation.sucrose.Susy	AT5G49190.1	AT5G49190.1 | Symbols: SUS2, SSA, ATSUS2 | sucrose synthase 2 | chr5:19943369-19947189 REVERSE LENGTH=807	Symbols: SUS2, SSA, ATSUS2 | SUS2 (SUCROSE SYNTHASE 2); UDP-glycosyltransferase/ sucrose synthase/ transferase, transferring glycosyl groups | chr5:19943282-19947189 REVERSE	Fruit
Pg_S1116.32	redox.ascorbate and glutathione.glutathione	AT4G11600.1	AT4G11600.1 | Symbols: ATGPX6, PHGPX, LSC803, GPX6 | glutathione peroxidase 6 | chr4:7010021-7011330 REVERSE LENGTH=232	Symbols: ATGPX6, PHGPX, LSC803 | ATGPX6 (GLUTATHIONE PEROXIDASE 6); glutathione peroxidase | chr4:7009769-7011375 REVERSE	Fruit
Pg_S7676.1	secondary metabolism.flavonoids.anthocyanins.anthocyanin 5-aromatic acyltransferase	AT1G03495.1	AT1G03495.1 | Symbols: | HXXXD-type acyl-transferase family protein | chr1:873436-874832 FORWARD LENGTH=465	transferase/ transferase, transferring acyl groups other than amino-acyl groups | chr1:873184-874935 FORWARD	Fruit
Pg_S8923.1	secondary metabolism.flavonoids.dihydroflavonols	AT4G01070.1	AT4G01070.1 | Symbols: GT72B1, UGT72B1 | UDP-Glycosyltransferase superfamily protein | chr4:461858-463300 REVERSE LENGTH=480	Symbols: GT72B1, UGT72B1 | GT72B1; UDP-glucosyltransferase/ UDP-glycosyltransferase/ transferase, transferring glycosyl groups | chr4:461592-463449 REVERSE	Fruit
Pg_S0155.15	amino acid metabolism.degradation.aromatic aa.tryptophan	AT3G24360.1	AT3G24360.1 | Symbols: | ATP-dependent caseinolytic (Clp) protease/crotonase family protein | chr3:8839832-8842799 REVERSE LENGTH=418	enoyl-CoA hydratase/isomerase family protein | chr3:8839728-8842831 REVERSE	Leaf
Pg_S2631.6	amino acid metabolism.degradation.serine-glycine-cysteine group.glycine	AT1G68010.2	AT1G68010.2 | Symbols: HPR | hydroxypyruvate reductase | chr1:25493418-25495720 FORWARD LENGTH=387	Symbols: HPR | HPR; glycerate dehydrogenase/ poly(U) binding | chr1:25493218-25495988 FORWARD	Leaf
Pg_S5998.6	amino acid metabolism.synthesis.branched chain group.leucine specific.2-isopropylmalate synthase	AT1G74040.1	AT1G74040.1 | Symbols: IMS1, MAML-3, IPMS2 | 2-isopropylmalate synthase 1 | chr1:27842258-27845566 FORWARD LENGTH=631	Symbols: IMS1, MAML-3, IPMS2 | IMS1 (2-ISOPROPYLMALATE SYNTHASE 1); 2-isopropylmalate synthase | chr1:27842171-27845776 FORWARD	Leaf
Pg_S7812.2	cell wall.precursor synthesis.MUR4	AT1G30620.1	AT1G30620.1 | Symbols: HSR8, MUR4, UXE1 | NAD(P)-binding Rossmann-fold superfamily protein | chr1:10855496-10857970 FORWARD LENGTH=419	Symbols: HSR8, MUR4, UXE1 | MUR4 (MURUS 4); UDP-arabinose 4-epimerase/ catalytic | chr1:10854549-10858244 FORWARD	Leaf
Pg_S6308.5	gluconeogenesis.Malate DH	AT5G09660.4	AT5G09660.4 | Symbols: PMDH2 | peroxisomal NAD-malate dehydrogenase 2 | chr5:2993691-2995551 REVERSE LENGTH=363	Symbols: PMDH2 | PMDH2 (peroxisomal NAD-malate dehydrogenase 2); malate dehydrogenase | chr5:2993444-2995675 REVERSE	Leaf
Pg_S1815.15	glycolysis.plastid branch.pyruvate kinase (PK)	AT5G56350.1	AT5G56350.1 | Symbols: | Pyruvate kinase family protein | chr5:22820254-22822529 REVERSE LENGTH=498	pyruvate kinase, putative | chr5:22820006-22822766 REVERSE	Leaf
Pg_S1302.2	lipid metabolism.FA synthesis and FA elongation.acyl coa ligase	AT3G48990.1	AT3G48990.1 | Symbols: | AMP-dependent synthetase and ligase family protein | chr3:18159031-18161294 REVERSE LENGTH=514	AMP-dependent synthetase and ligase family protein | chr3:18158747-18161379 REVERSE	Leaf
Pg_S4380.10	lipid metabolism.FA synthesis and FA elongation.beta ketoacyl CoA synthase	AT2G28630.1	AT2G28630.1 | Symbols: KCS12 | 3-ketoacyl-CoA synthase 12 | chr2:12275719-12277149 REVERSE LENGTH=476	Symbols: KCS12 | KCS12 (3-KETOACYL-COA SYNTHASE 12); acyltransferase/ catalytic/ transferase, transferring acyl groups other than amino-acyl groups | chr2:12275319-12277245 REVERSE	Leaf
Pg_S0155.15	lipid metabolism.lipid degradation.beta-oxidation.enoyl CoA hydratase	AT3G24360.1	AT3G24360.1 | Symbols: | ATP-dependent caseinolytic (Clp) protease/crotonase family protein | chr3:8839832-8842799 REVERSE LENGTH=418	enoyl-CoA hydratase/isomerase family protein | chr3:8839728-8842831 REVERSE	Leaf
Pg_S0488.18	lipid metabolism.lipid degradation.lipases.triacylglycerol lipase	AT4G16820.1	AT4G16820.1 | Symbols: PLA-I{beta]2 | alpha/beta-Hydrolases superfamily protein | chr4:9467563-9469116 FORWARD LENGTH=517	lipase class 3 family protein | chr4:9467563-9469116 FORWARD	Leaf
Pg_S0077.34	lipid metabolism.Phospholipid synthesis	AT1G73600.2	AT1G73600.2 | Symbols: | S-adenosyl-L-methionine-dependent methyltransferases superfamily protein | chr1:27669224-27673400 FORWARD LENGTH=504	methyltransferase/ phosphoethanolamine N-methyltransferase | chr1:27669152-27673572 FORWARD	Leaf
Pg_S3535.2	major CHO metabolism.synthesis.starch.AGPase	AT5G19220.1	AT5G19220.1 | Symbols: ADG2, APL1 | ADP glucose pyrophosphorylase large subunit 1 | chr5:6463931-6466775 REVERSE LENGTH=522	Symbols: ADG2, APL1 | APL1 (ADP GLUCOSE PYROPHOSPHORYLASE LARGE SUBUNIT 1); glucose-1-phosphate adenylyltransferase | chr5:6463824-6466831 REVERSE	Leaf
Pg_S1335.38	minor CHO metabolism.others	AT5G53850.2	AT5G53850.2 | Symbols: | haloacid dehalogenase-like hydrolase family protein | chr5:21861155-21864817 REVERSE LENGTH=507	haloacid dehalogenase-like hydrolase family protein | chr5:21860997-21864926 REVERSE	Leaf
Pg_S2793.5	minor CHO metabolism.raffinose family.raffinose synthases.putative	AT3G57520.1	AT3G57520.1 | Symbols: AtSIP2, SIP2 | seed imbibition 2 | chr3:21288982-21292694 REVERSE LENGTH=773	Symbols: AtSIP2 | AtSIP2 (Arabidopsis thaliana seed imbibition 2); hydrolase, hydrolyzing O-glycosyl compounds | chr3:21288765-21293158 REVERSE	Leaf
Pg_S6869.2	nucleotide metabolism.phosphotransfer and pyrophosphatases.misc	AT3G57560.1	AT3G57560.1 | Symbols: NAGK | N-acetyl-l-glutamate kinase | chr3:21311164-21312207 REVERSE LENGTH=347	aspartate/glutamate/uridylate kinase family protein | chr3:21310825-21312312 REVERSE	Leaf
Pg_S1815.10	OPP.non-reductive PP.transaldolase	AT5G13420.1	AT5G13420.1 | Symbols: | Aldolase-type TIM barrel family protein | chr5:4302080-4304212 REVERSE LENGTH=438	transaldolase, putative | chr5:4301792-4304312 REVERSE	Leaf
Pg_S1935.17	OPP.oxidative PP.6-phosphogluconolactonase	AT5G24410.1	AT5G24410.1 | Symbols: PGL4 | 6-phosphogluconolactonase 4 | chr5:8332690-8333984 REVERSE LENGTH=261	glucosamine/galactosamine-6-phosphate isomerase-related | chr5:8332473-8334066 REVERSE	Leaf
Pg_S0835.4	PS.lightreaction.ATP synthase.delta chain	AT4G09650.1	AT4G09650.1 | Symbols: ATPD | ATP synthase delta-subunit gene | chr4:6100799-6101503 FORWARD LENGTH=234	Symbols: ATPD | ATPD (ATP SYNTHASE DELTA-SUBUNIT GENE); hydrogen ion transporting ATP synthase, rotational mechanism / proton-transporting ATPase, rotational mechanism | chr4:6100743-6101708 FORWARD	Leaf
Pg_S0488.29	PS.lightreaction.cyclic electron flow-chlororespiration	AT3G15840.1	AT3G15840.1 | Symbols: PIFI | post-illumination chlorophyll fluorescence increase | chr3:5356782-5358418 REVERSE LENGTH=268	Symbols: PIFI | PIFI (post-illumination chlorophyll fluorescence increase) | chr3:5356638-5358500 REVERSE	Leaf
Pg_S2159.10	PS.lightreaction.cyclic electron flow-chlororespiration	ATCG01110.1	ATCG01110.1 | Symbols: NDHH | NAD(P)H dehydrogenase subunit H | chrC:122011-123192 REVERSE LENGTH=393	Symbols: NDHH | Encodes the 49KDa plastid NAD(P)H dehydrogenase subunit H protein. Its transcription is regulated by an ndhF-specific plastid sigma factor, SIG4. | chrC:122011-123192 REVERSE	Leaf
Pg_S1307.5	PS.lightreaction.NADH DH	ATCG00420.1	ATCG00420.1 | Symbols: NDHJ | NADH dehydrogenase subunit J | chrC:48677-49153 REVERSE LENGTH=158	Symbols: NDHJ | Encodes NADH dehydrogenase subunit J. Its transcription is increased upon sulfur depletion. | chrC:48677-49153 REVERSE	Leaf
Pg_S1204.17	PS.lightreaction.photosystem I.PSI polypeptide subunits	AT2G46820.1	AT2G46820.1 | Symbols: PTAC8, TMP14, PSAP, PSI-P | photosystem I P subunit | chr2:19243729-19244870 FORWARD LENGTH=174	Symbols: PTAC8, TMP14, PSAP, PSI-P | PSI-P (PHOTOSYSTEM I P SUBUNIT); DNA binding | chr2:19243589-19245141 FORWARD	Leaf
Pg_S0724.24	PS.lightreaction.photosystem I.PSI polypeptide subunits	AT1G52230.1	AT1G52230.1 | Symbols: PSAH2, PSAH-2, PSI-H | photosystem I subunit H2 | chr1:19454902-19455508 FORWARD LENGTH=145	Symbols: PSAH2, PSAH-2, PSI-H | PSAH2 (PHOTOSYSTEM I SUBUNIT H2) | chr1:19454836-19455668 FORWARD	Leaf
Pg_S0804.56	PS.lightreaction.photosystem II.LHC-II	AT1G29930.1	AT1G29930.1 | Symbols: CAB1, AB140, CAB140, LHCB1.3 | chlorophyll A/B binding protein 1 | chr1:10478071-10478874 FORWARD LENGTH=267	Symbols: CAB1, AB140, CAB140, LHCB1.3 | CAB1 (CHLOROPHYLL A/B BINDING PROTEIN 1); chlorophyll binding | chr1:10478005-10479048 FORWARD	Leaf
Pg_S1555.3	PS.lightreaction.photosystem II.PSII polypeptide subunits	ATCG00680.1	ATCG00680.1 | Symbols: PSBB | photosystem II reaction center protein B | chrC:72371-73897 FORWARD LENGTH=508	Symbols: PSBB | encodes for CP47, subunit of the photosystem II reaction center. | chrC:72371-73897 FORWARD	Leaf
Pg_S0148.7	PS.lightreaction.photosystem II.PSII polypeptide subunits	AT4G05180.1	AT4G05180.1 | Symbols: PSBQ, PSBQ-2, PSII-Q | photosystem II subunit Q-2 | chr4:2672093-2673170 REVERSE LENGTH=230	Symbols: PSBQ, PSBQ-2, PSII-Q | PSBQ-2; calcium ion binding | chr4:2671822-2673243 REVERSE	Leaf
Pg_S2566.13	PS.lightreaction.photosystem II.PSII polypeptide subunits	AT2G28605.1	AT2G28605.1 | Symbols: | Photosystem II reaction center PsbP family protein | chr2:12254911-12255689 FORWARD LENGTH=232	Encodes a PsbP domain-OEC23 like protein localized in thylakoid (peripheral-lumenal side). | chr2:12254888-12255837 FORWARD	Leaf
Pg_S5440.10	PS.lightreaction.photosystem II.PSII polypeptide subunits	AT4G28660.2	AT4G28660.2 | Symbols: PSB28 | photosystem II reaction center PSB28 protein | chr4:14150008-14150933 FORWARD LENGTH=198	Symbols: PSB28 | PSB28 (PHOTOSYSTEM II REACTION CENTER PSB28 PROTEIN) | chr4:14149916-14151104 FORWARD	Leaf
Pg_S4529.2	PS.lightreaction.photosystem II.PSII polypeptide subunits	AT1G79040.1	AT1G79040.1 | Symbols: PSBR | photosystem II subunit R | chr1:29736085-29736781 FORWARD LENGTH=140	Symbols: PSBR | PSBR (photosystem II subunit R) | chr1:29736016-29737009 FORWARD	Leaf
Pg_S2631.6	PS.photorespiration.hydroxypyruvate reductase	AT1G68010.2	AT1G68010.2 | Symbols: HPR | hydroxypyruvate reductase | chr1:25493418-25495720 FORWARD LENGTH=387	Symbols: HPR | HPR; glycerate dehydrogenase/ poly(U) binding | chr1:25493218-25495988 FORWARD	Leaf
Pg_S6578.5	secondary metabolism.flavonoids.chalcones	AT1G59960.1	AT1G59960.1 | Symbols: | NAD(P)-linked oxidoreductase superfamily protein | chr1:22071410-22073067 REVERSE LENGTH=326	aldo/keto reductase, putative | chr1:22071292-22073147 REVERSE	Leaf
Pg_S8810.2	secondary metabolism.isoprenoids.carotenoids.lycopene beta cyclase	AT3G10230.1	AT3G10230.1 | Symbols: LYC | lycopene cyclase | chr3:3164340-3165845 REVERSE LENGTH=501	Symbols: LYC | LYC (LYCOPENE CYCLASE); lycopene beta cyclase | chr3:3164075-3166038 REVERSE	Leaf
Pg_S1908.21	secondary metabolism.isoprenoids.non-mevalonate pathway.DXS	AT4G15560.1	AT4G15560.1 | Symbols: CLA1, DEF, CLA, DXS, DXPS2 | Deoxyxylulose-5-phosphate synthase | chr4:8884218-8887254 FORWARD LENGTH=717	Symbols: CLA1, DEF, CLA, DXS, DXPS2 | CLA1 (CLOROPLASTOS ALTERADOS 1); 1-deoxy-D-xylulose-5-phosphate synthase | chr4:8883907-8887565 FORWARD	Leaf
Pg_S4604.8	secondary metabolism.isoprenoids.non-mevalonate pathway.HDR	AT4G34350.1	AT4G34350.1 | Symbols: CLB6, ISPH, HDR | 4-hydroxy-3-methylbut-2-enyl diphosphate reductase | chr4:16428681-16431038 REVERSE LENGTH=466	Symbols: CLB6, ISPH, HDR | HDR (4-HYDROXY-3-METHYLBUT-2-ENYL DIPHOSPHATE REDUCTASE); 4-hydroxy-3-methylbut-2-en-1-yl diphosphate reductase/ 4-hydroxy-3-methylbut-2-en-1-yl diphosphate synthase | chr4:16428480-16431114 REVERSE	Leaf
Pg_S2507.15	tetrapyrrole synthesis.glu-tRNA synthetase	AT1G48520.1	AT1G48520.1 | Symbols: GATB | GLU-ADT subunit B | chr1:17940185-17942540 FORWARD LENGTH=550	Symbols: GATB | GATB (GLU-ADT SUBUNIT B); carbon-nitrogen ligase, with glutamine as amido-N-donor / glutaminyl-tRNA synthase (glutamine-hydrolyzing)/ ligase | chr1:17940100-17942822 FORWARD	Leaf
Pg_S4541.1	tetrapyrrole synthesis.GSA	AT3G48730.1	AT3G48730.1 | Symbols: GSA2 | glutamate-1-semialdehyde 2,1-aminomutase 2 | chr3:18049697-18051550 FORWARD LENGTH=472	Symbols: GSA2 | GSA2 (glutamate-1-semialdehyde 2,1-aminomutase 2); catalytic/ glutamate-1-semialdehyde 2,1-aminomutase/ pyridoxal phosphate binding / transaminase | chr3:18049614-18051702 FORWARD	Leaf
Pg_S4032.1	tetrapyrrole synthesis.porphobilinogen deaminase	AT5G08280.1	AT5G08280.1 | Symbols: HEMC | hydroxymethylbilane synthase | chr5:2663763-2665596 REVERSE LENGTH=382	Symbols: HEMC | HEMC (HYDROXYMETHYLBILANE SYNTHASE); hydroxymethylbilane synthase | chr5:2663499-2665792 REVERSE	Leaf
Pg_S0924.3	amino acid metabolism.degradation.glutamate family.arginine	AT5G46180.1	AT5G46180.1 | Symbols: DELTA-OAT | ornithine-delta-aminotransferase | chr5:18718766-18721271 REVERSE LENGTH=475	Symbols: DELTA-OAT | delta-OAT; ornithine-oxo-acid transaminase | chr5:18718475-18721375 REVERSE	Root
Pg_S4851.12	amino acid metabolism.synthesis.aspartate family.asparagine.asparagine synthetase	AT3G47340.1	AT3G47340.1 | Symbols: ASN1, DIN6, AT-ASN1 | glutamine-dependent asparagine synthase 1 | chr3:17438136-17441043 REVERSE LENGTH=584	Symbols: ASN1, DIN6, AT-ASN1 | ASN1 (GLUTAMINE-DEPENDENT ASPARAGINE SYNTHASE 1); asparagine synthase (glutamine-hydrolyzing) | chr3:17437884-17441243 REVERSE	Root
Pg_S1410.17	cell wall.degradation.pectate lyases and polygalacturonases	AT1G60590.1	AT1G60590.1 | Symbols: | Pectin lyase-like superfamily protein | chr1:22314426-22316867 REVERSE LENGTH=540	polygalacturonase, putative / pectinase, putative | chr1:22314170-22316970 REVERSE	Root
Pg_S0765.23	cell wall.pectin*esterases.PME	AT3G05610.1	AT3G05610.1 | Symbols: | Plant invertase/pectin methylesterase inhibitor superfamily | chr3:1625876-1627976 REVERSE LENGTH=669	pectinesterase family protein | chr3:1625672-1628173 REVERSE	Root
Pg_S0741.27	cell wall.precursor synthesis.MUR4	AT1G30620.1	AT1G30620.1 | Symbols: HSR8, MUR4, UXE1 | NAD(P)-binding Rossmann-fold superfamily protein | chr1:10855496-10857970 FORWARD LENGTH=419	Symbols: HSR8, MUR4, UXE1 | MUR4 (MURUS 4); UDP-arabinose 4-epimerase/ catalytic | chr1:10854549-10858244 FORWARD	Root
Pg_S5586.1	fermentation.aldehyde dehydrogenase	AT1G44170.1	AT1G44170.1 | Symbols: ALDH3H1, ALDH4 | aldehyde dehydrogenase 3H1 | chr1:16796564-16800031 REVERSE LENGTH=484	Symbols: ALDH3H1, ALDH4 | ALDH3H1 (ALDEHYDE DEHYDROGENASE 3H1); 3-chloroallyl aldehyde dehydrogenase/ aldehyde dehydrogenase (NAD) | chr1:16796400-16800321 REVERSE	Root
Pg_S0516.35	glycolysis.cytosolic branch.phosphofructokinase (PFK)	AT5G47810.1	AT5G47810.1 | Symbols: PFK2 | phosphofructokinase 2 | chr5:19356569-19357989 REVERSE LENGTH=444	Symbols: PFK2 | PFK2 (PHOSPHOFRUCTOKINASE 2); 6-phosphofructokinase | chr5:19356356-19358125 REVERSE	Root
Pg_S4484.10	major CHO metabolism.degradation.starch.starch cleavage	AT4G15210.1	AT4G15210.1 | Symbols: ATBETA-AMY, AT-BETA-AMY, RAM1, BMY1, BAM5 | beta-amylase 5 | chr4:8666734-8669357 REVERSE LENGTH=498	Symbols: ATBETA-AMY, AT-BETA-AMY, RAM1, BMY1, BAM5 | BAM5 (BETA-AMYLASE 5); beta-amylase | chr4:8666338-8669470 REVERSE	Root
Pg_S1421.5	major CHO metabolism.synthesis.starch.debranching	AT4G09020.1	AT4G09020.1 | Symbols: ATISA3, ISA3 | isoamylase 3 | chr4:5784099-5788839 FORWARD LENGTH=764	Symbols: ATISA3, ISA3 | ISA3 (ISOAMYLASE 3); alpha-amylase/ isoamylase | chr4:5784074-5789002 FORWARD	Root
Pg_S3303.10	major CHO metabolism.synthesis.starch.starch branching	AT5G03650.1	AT5G03650.1 | Symbols: SBE2.2 | starch branching enzyme 2.2 | chr5:931924-937470 FORWARD LENGTH=805	Symbols: SBE2.2 | SBE2.2 (starch branching enzyme 2.2); 1,4-alpha-glucan branching enzyme | chr5:931904-937641 FORWARD	Root
Pg_S0188.9	mitochondrial electron transport / ATP synthesis.cytochrome c reductase	AT5G13440.1	AT5G13440.1 | Symbols: | Ubiquinol-cytochrome C reductase iron-sulfur subunit | chr5:4308431-4310022 REVERSE LENGTH=274	ubiquinol-cytochrome C reductase iron-sulfur subunit, mitochondrial, putative / Rieske iron-sulfur protein, putative | chr5:4308129-4310181 REVERSE	Root
Pg_S3931.2	mitochondrial electron transport / ATP synthesis.F1-ATPase	AT2G21870.1	AT2G21870.1 | Symbols: MGP1 | copper ion binding;cobalt ion binding;zinc ion binding | chr2:9320456-9322618 REVERSE LENGTH=240	unknown protein | chr2:9320195-9322734 REVERSE	Root
Pg_S1336.15	nucleotide metabolism.degradation	AT2G19570.1	AT2G19570.1 | Symbols: CDA1, AT-CDA1, DESZ | cytidine deaminase 1 | chr2:8470598-8471503 REVERSE LENGTH=301	Symbols: CDA1, AT-CDA1, DESZ | CDA1 (CYTIDINE DEAMINASE 1); cytidine deaminase | chr2:8470374-8471644 REVERSE	Root
Pg_S1957.18	OPP.oxidative PP.G6PD	AT5G13110.1	AT5G13110.1 | Symbols: G6PD2 | glucose-6-phosphate dehydrogenase 2 | chr5:4158952-4161640 FORWARD LENGTH=596	Symbols: G6PD2 | G6PD2 (GLUCOSE-6-PHOSPHATE DEHYDROGENASE 2); glucose-6-phosphate dehydrogenase | chr5:4158811-4161820 FORWARD	Root
Pg_S0575.47	redox.ascorbate and glutathione.ascorbate	AT1G07890.3	AT1G07890.3 | Symbols: APX1, MEE6, CS1, ATAPX1, ATAPX01 | ascorbate peroxidase 1 | chr1:2438005-2439435 FORWARD LENGTH=250	Symbols: APX1, CS1 | APX1 (ascorbate peroxidase 1); L-ascorbate peroxidase | chr1:2437725-2439665 FORWARD	Root
Pg_S2907.5	secondary metabolism.flavonoids.anthocyanins.anthocyanin 5-aromatic acyltransferase	AT1G03495.1	AT1G03495.1 | Symbols: | HXXXD-type acyl-transferase family protein | chr1:873436-874832 FORWARD LENGTH=465	transferase/ transferase, transferring acyl groups other than amino-acyl groups | chr1:873184-874935 FORWARD	Root
Pg_S1806.19	secondary metabolism.flavonoids.dihydroflavonols	AT4G01070.1	AT4G01070.1 | Symbols: GT72B1, UGT72B1 | UDP-Glycosyltransferase superfamily protein | chr4:461858-463300 REVERSE LENGTH=480	Symbols: GT72B1, UGT72B1 | GT72B1; UDP-glucosyltransferase/ UDP-glycosyltransferase/ transferase, transferring glycosyl groups | chr4:461592-463449 REVERSE	Root
Pg_S2273.8	secondary metabolism.flavonoids.dihydroflavonols.flavonoid 3''-monooxygenase	AT5G07990.1	AT5G07990.1 | Symbols: TT7, CYP75B1, D501 | Cytochrome P450 superfamily protein | chr5:2560437-2562859 FORWARD LENGTH=513	Symbols: TT7, CYP75B1, D501 | TT7 (TRANSPARENT TESTA 7); flavonoid 3'-monooxygenase/ oxygen binding | chr5:2560394-2563109 FORWARD	Root
Pg_S0682.2	secondary metabolism.isoprenoids.terpenoids	AT5G23960.1	AT5G23960.1 | Symbols: ATTPS21, TPS21 | terpene synthase 21 | chr5:8092969-8095128 FORWARD LENGTH=547	Symbols: ATTPS21, TPS21 | TPS21 (TERPENE SYNTHASE 21); (-)-E-beta-caryophyllene synthase/ alpha-humulene synthase | chr5:8092969-8095128 FORWARD	Root
Pg_S6761.5	secondary metabolism.N misc.cyanogenic glycosides	AT3G23490.1	AT3G23490.1 | Symbols: CYN | cyanase | chr3:8423238-8424415 REVERSE LENGTH=168	Symbols: CYN | CYN (CYANASE); DNA binding / cyanate hydratase/ hydro-lyase | chr3:8423011-8424652 REVERSE	Root
Pg_S1446.8	secondary metabolism.phenylpropanoids	AT4G35160.1	AT4G35160.1 | Symbols: | O-methyltransferase family protein | chr4:16730989-16732808 REVERSE LENGTH=382	O-methyltransferase family 2 protein | chr4:16730760-16732811 REVERSE	Root
Pg_S3518.16	amino acid metabolism.synthesis.aspartate family.methionine	AT2G36880.1	AT2G36880.1 | Symbols: MAT3 | methionine adenosyltransferase 3 | chr2:15479721-15480893 REVERSE LENGTH=390	Symbols: MAT3 | MAT3 (methionine adenosyltransferase 3); copper ion binding / methionine adenosyltransferase | chr2:15479366-15481412 REVERSE	Shoot
Pg_S4778.7	cell wall.cell wall proteins.LRR	AT2G42800.1	AT2G42800.1 | Symbols: AtRLP29, RLP29 | receptor like protein 29 | chr2:17808157-17809545 REVERSE LENGTH=462	Symbols: AtRLP29 | AtRLP29 (Receptor Like Protein 29); protein binding | chr2:17807942-17809590 REVERSE	Shoot
Pg_S2579.3	cell wall.cellulose synthesis	AT5G49720.1	AT5G49720.1 | Symbols: ATGH9A1, TSD1, DEC, KOR, RSW2, IRX2, KOR1, GH9A1 | glycosyl hydrolase 9A1 | chr5:20197765-20200168 REVERSE LENGTH=621	Symbols: ATGH9A1, DEC, KOR, RSW2, IRX2, KOR1 | ATGH9A1 (ARABIDOPSIS THALIANA GLYCOSYL HYDROLASE 9A1); cellulase/ hydrolase, hydrolyzing O-glycosyl compounds | chr5:20197391-20200288 REVERSE	Shoot
Pg_S1858.19	cell wall.modification	AT4G37800.1	AT4G37800.1 | Symbols: XTH7 | xyloglucan endotransglucosylase/hydrolase 7 | chr4:17775703-17777372 REVERSE LENGTH=293	xyloglucan:xyloglucosyl transferase, putative / xyloglucan endotransglycosylase, putative / endo-xyloglucan transferase, putative | chr4:17775474-17777397 REVERSE	Shoot
Pg_S4409.12	cell wall.modification	AT1G69530.3	AT1G69530.3 | Symbols: ATEXPA1, EXP1, AT-EXP1, ATEXP1, ATHEXP ALPHA 1.2, EXPA1 | expansin A1 | chr1:26142034-26143200 FORWARD LENGTH=275	Symbols: ATEXPA1, EXP1, AT-EXP1, ATEXP1, ATHEXP ALPHA 1.2 | ATEXPA1 (ARABIDOPSIS THALIANA EXPANSIN A1) | chr1:26141836-26143496 FORWARD	Shoot
Pg_S1777.2	cell wall.pectin*esterases.acetyl esterase	AT3G05910.1	AT3G05910.1 | Symbols: | Pectinacetylesterase family protein | chr3:1764509-1767240 REVERSE LENGTH=415	pectinacetylesterase, putative | chr3:1764294-1767575 REVERSE	Shoot
Pg_S0981.31	cell wall.precursor synthesis.UGD	AT5G15490.1	AT5G15490.1 | Symbols: | UDP-glucose 6-dehydrogenase family protein | chr5:5027872-5029314 REVERSE LENGTH=480	UDP-glucose 6-dehydrogenase, putative | chr5:5027639-5030194 REVERSE	Shoot
Pg_S1514.21	glycolysis.plastid branch.pyrophosphate-fructose-6-P phosphotransferase	AT1G12000.1	AT1G12000.1 | Symbols: | Phosphofructokinase family protein | chr1:4050159-4053727 REVERSE LENGTH=566	pyrophosphate--fructose-6-phosphate 1-phosphotransferase beta subunit, putative / pyrophosphate-dependent 6-phosphofructose-1-kinase, putative | chr1:4049896-4053835 REVERSE	Shoot
Pg_S5964.5	major CHO metabolism.degradation.sucrose.Susy	AT1G73370.1	AT1G73370.1 | Symbols: SUS6, ATSUS6 | sucrose synthase 6 | chr1:27584533-27588326 REVERSE LENGTH=942	Symbols: SUS6, ATSUS6 | SUS6 (SUCROSE SYNTHASE 6); UDP-glycosyltransferase/ sucrose synthase | chr1:27584479-27588326 REVERSE	Shoot
Pg_S7836.3	major CHO metabolism.synthesis.starch.AGPase	AT1G74910.1	AT1G74910.1 | Symbols: | ADP-glucose pyrophosphorylase family protein | chr1:28135770-28138456 REVERSE LENGTH=415	ADP-glucose pyrophosphorylase family protein | chr1:28135361-28138768 REVERSE	Shoot
Pg_S3153.2	minor CHO metabolism.others	AT5G58730.1	AT5G58730.1 | Symbols: | pfkB-like carbohydrate kinase family protein | chr5:23723627-23725324 REVERSE LENGTH=353	pfkB-type carbohydrate kinase family protein | chr5:23723404-23725465 REVERSE	Shoot
Pg_S1415.9	N-metabolism.N-degradation.glutamate dehydrogenase	AT5G18170.1	AT5G18170.1 | Symbols: GDH1 | glutamate dehydrogenase 1 | chr5:6006172-6008248 FORWARD LENGTH=411	Symbols: GDH1 | GDH1 (GLUTAMATE DEHYDROGENASE 1); ATP binding / glutamate dehydrogenase [NAD(P)+]/ oxidoreductase | chr5:6006039-6008472 FORWARD	Shoot
Pg_S3550.9	OPP.non-reductive PP.transaldolase	AT5G13420.1	AT5G13420.1 | Symbols: | Aldolase-type TIM barrel family protein | chr5:4302080-4304212 REVERSE LENGTH=438	transaldolase, putative | chr5:4301792-4304312 REVERSE	Shoot
Pg_S0859.22	secondary metabolism.flavonoids.anthocyanins.anthocyanin 5-aromatic acyltransferase	AT1G03495.1	AT1G03495.1 | Symbols: | HXXXD-type acyl-transferase family protein | chr1:873436-874832 FORWARD LENGTH=465	transferase/ transferase, transferring acyl groups other than amino-acyl groups | chr1:873184-874935 FORWARD	Shoot
Pg_S2538.6	secondary metabolism.flavonoids.dihydroflavonols.flavonoid 3''-monooxygenase	AT5G07990.1	AT5G07990.1 | Symbols: TT7, CYP75B1, D501 | Cytochrome P450 superfamily protein | chr5:2560437-2562859 FORWARD LENGTH=513	Symbols: TT7, CYP75B1, D501 | TT7 (TRANSPARENT TESTA 7); flavonoid 3'-monooxygenase/ oxygen binding | chr5:2560394-2563109 FORWARD	Shoot
Pg_S4463.3	secondary metabolism.N misc.alkaloid-like	AT1G08470.1	AT1G08470.1 | Symbols: SSL3 | strictosidine synthase-like 3 | chr1:2682262-2683977 REVERSE LENGTH=390	strictosidine synthase family protein | chr1:2682127-2684100 REVERSE	Shoot
Pg_S2327.6	secondary metabolism.phenylpropanoids	AT4G35160.1	AT4G35160.1 | Symbols: | O-methyltransferase family protein | chr4:16730989-16732808 REVERSE LENGTH=382	O-methyltransferase family 2 protein | chr4:16730760-16732811 REVERSE	Shoot
Pg_S0252.5	secondary metabolism.phenylpropanoids.lignin biosynthesis.HCT	AT5G48930.1	AT5G48930.1 | Symbols: HCT | hydroxycinnamoyl-CoA shikimate/quinate hydroxycinnamoyl transferase | chr5:19836654-19838092 REVERSE LENGTH=433	Symbols: HCT | HCT (HYDROXYCINNAMOYL-COA SHIKIMATE/QUINATE HYDROXYCINNAMOYL TRANSFERASE); quinate O-hydroxycinnamoyltransferase/ shikimate O-hydroxycinnamoyltransferase/ transferase | chr5:19836299-19838162 REVERSE	Shoot
Pg_S4042.1	secondary metabolism.simple phenols	AT2G38080.1	AT2G38080.1 | Symbols: IRX12, LAC4, ATLMCO4, LMCO4 | Laccase/Diphenol oxidase family protein | chr2:15934540-15937352 FORWARD LENGTH=558	Symbols: IRX12, LAC4 | IRX12 (IRREGULAR XYLEM 12); laccase | chr2:15934460-15937616 FORWARD	Shoot
