# Supplementary material for: Optimization of Protein Isolation and Label-Free Quantitative Proteomic Analysis in Four Different Tissues of Korean Ginseng
Source: Plants (Basel). 2021 Jul 9;10(7):1409. doi: 10.3390/plants10071409 (PMC8309323; doi:10.3390/plants10071409)
Supplement: Supplementary file 1 [file plants-10-01409-s001.zip › Table S5.xlsx]

## Sheet: Ginsenoside involved proteins
Table 1. List of proteins involved in ginsenoside biosynthesis
Ginseng ID	Protein name	[TAIR10]	[Uniprot] ID	[TAIR10] Description	[UniProt] Description	Descript of target pathway
Pg_S6240.3	Acetyl-CoA acetyltransferase [AACT]	AT5G47720.2	A0A076VAK8	AT5G47720.2 | Symbols: | Thiolase family protein | chr5:19331762-19334145 FORWARD LENGTH=415	acetyl-CoA C-acetyltransferase [Panax notoginseng]	MVA and MEP pathways
Pg_S6896.2	Hydroxymethylglutaryl-CoA synthase [HMGS]	AT4G11820.2	A0A076V6U2	AT4G11820.2 | Symbols: MVA1, FKP1 | hydroxymethylglutaryl-CoA synthase / HMG-CoA synthase / 3-hydroxy-3-methylglutaryl coenzyme A synthase | chr4:7109124-7111901 REVERSE LENGTH=461	3-hydroxy-3-methylglutaryl coenzyme A synthase [Panax notoginseng]	MVA and MEP pathways
Pg_S3074.4	Diphosphomevalonate decarboxylase 2 [MVD]	AT1G31910.1	I6TNF8	AT1G31910.1 | Symbols: | GHMP kinase family protein | chr1:11459050-11461649 FORWARD LENGTH=505	mevalonate diphosphate decarboxylase [Eleutherococcus senticosus]	MVA and MEP pathways
Pg_S7337.2	Isopentenyl- diphosphate delta-isomerase [IDI]	AT5G16440.1	A0A076VAK4	AT5G16440.1 | Symbols: IPP1 | isopentenyl diphosphate isomerase 1 | chr5:5371765-5373575 FORWARD LENGTH=291	isopentenyl diphosphate isomerase 2 [Panax notoginseng]	MVA and MEP pathways
Pg_S1908.21	1-deoxy-D-xylulose-5-phosphate synthase [DXS]	AT4G15560.1	Q8Z8X3	AT4G15560.1 | Symbols: CLA1, DEF, CLA, DXS, DXPS2 | Deoxyxylulose-5-phosphate synthase | chr4:8884218-8887254 FORWARD LENGTH=717	1-deoxy-D-xylulose-5-phosphate synthase OS=Salmonella typhi GN=dxs PE=3 SV=3	MVA and MEP pathways
Pg_S3759.10	1-deoxy-D-xylulose-5-phosphate synthase [DXS]	AT4G15560.1	Q8Z8X3	AT4G15560.1 | Symbols: CLA1, DEF, CLA, DXS, DXPS2 | Deoxyxylulose-5-phosphate synthase | chr4:8884218-8887254 FORWARD LENGTH=717	1-deoxy-D-xylulose-5-phosphate synthase OS=Salmonella typhi GN=dxs PE=3 SV=3	MVA and MEP pathways
Pg_S4650.8	1-deoxy-D-xylulose 5-phosphate reductoisomerase [DXR]	AT5G62790.2	Q5F5X0	| Symbols: DXR, PDE129 | 1-deoxy-D-xylulose 5-phosphate reductoisomerase | chr5:25214358-25217292 REVERSE LENGTH=477	1-deoxy-D-xylulose 5-phosphate reductoisomerase OS=Neisseria gonorrhoeae (strain ATCC 700825 / FA 1090) GN=dxr PE=3 SV=1	MVA and MEP pathways
Pg_S3733.18	1-deoxy-D-xylulose 5-phosphate reductoisomerase [DXR]	AT5G62790.2	Q5F5X0	AT5G62790.2 | Symbols: DXR | 1-deoxy-D-xylulose 5-phosphate reductoisomerase | chr5:25214358-25217289 REVERSE LENGTH=497	1-deoxy-D-xylulose 5-phosphate reductoisomerase OS=Neisseria gonorrhoeae (strain ATCC 700825 / FA 1090) GN=dxr PE=3 SV=1	MVA and MEP pathways
Pg_S0544.32	2-C-methyl-D-erythritol 4-phosphate cytidylyltransferase (ispD)	AT2G37090.1	Q9CW73	AT2G37090.1 | Symbols: IRX9 | Nucleotide-diphospho-sugar transferases superfamily protein | chr2:15587671-15589223 REVERSE LENGTH=351	Galactosylgalactosylxylosylprotein 3-beta-glucuronosyltransferase 1 OS=Mus musculus GN=B3gat1 PE=2 SV=2	MVA and MEP pathways
Pg_S2198.2	4-diphosphocytidyl-2-C-methyl-D-erythritol kinase [ispE]	AT2G26930	W8CIE8	| Symbols: ATCDPMEK, PDE277, ISPE, CDPMEK | 4-(cytidine 5'-phospho)-2-C-methyl-D-erithritol kinase | chr2:11491829-11494229 REVERSE LENGTH=383	4-diphosphocytidyl-2-C-methyl-D-erythritol kinase [Lonicera dasystyla]	MVA and MEP pathways
Pg_S7699.3	2-C-methyl-D-erythritol 2,4-cyclodiphosphate synthase [ispF]	AT1G63970.1	Q8ZMF7	AT1G63970.1 | Symbols: ISPF, MECPS | isoprenoid F | chr1:23738923-23740336 REVERSE LENGTH=231	2-C-methyl-D-erythritol 2,4-cyclodiphosphate synthase OS=Salmonella typhimurium (strain LT2 / SGSC1412 / ATCC 700720) GN=ispF PE=1 SV=1	MVA and MEP pathways
Pg_S0833.9	(E)-4-hydroxy-3-methylbut-2-enyl-diphosphate synthase [ispG]	AT5G60600.1	B7VJT8	AT5G60600.1 | Symbols: GCPE, ISPG, CSB3, CLB4, HDS | 4-hydroxy-3-methylbut-2-enyl diphosphate synthase | chr5:24359447-24363274 FORWARD LENGTH=741	4-hydroxy-3-methylbut-2-en-1-yl diphosphate synthase OS=Vibrio splendidus (strain LGP32) GN=ispG PE=3 SV=1	MVA and MEP pathways
Pg_S0247.51	(E)-4-hydroxy-3-methylbut-2-enyl-diphosphate synthase [ispG]	AT5G60600.1	B7VJT8	AT5G60600.1 | Symbols: GCPE, ISPG, CSB3, CLB4, HDS | 4-hydroxy-3-methylbut-2-enyl diphosphate synthase | chr5:24359447-24363274 FORWARD LENGTH=741	4-hydroxy-3-methylbut-2-en-1-yl diphosphate synthase OS=Vibrio splendidus (strain LGP32) GN=ispG PE=3 SV=1	MVA and MEP pathways
Pg_S3713.7	4-hydroxy-3-methylbut-2-enyl diphosphate reductase [ispH]	AT4G34350.1	Q9FBM1	AT4G34350.1 | Symbols: CLB6, ISPH, HDR | 4-hydroxy-3-methylbut-2-enyl diphosphate reductase | chr4:16428681-16431038 REVERSE LENGTH=466	4-hydroxy-3-methylbut-2-enyl diphosphate reductase OS=Streptomyces coelicolor (strain ATCC BAA-471 / A3(2) / M145) GN=ispH PE=3 SV=2	MVA and MEP pathways
Pg_S4604.8	4-hydroxy-3-methylbut-2-enyl diphosphate reductase [ispH]	AT4G34350.1	Q9FBM1	AT4G34350.1 | Symbols: CLB6, ISPH, HDR | 4-hydroxy-3-methylbut-2-enyl diphosphate reductase | chr4:16428681-16431038 REVERSE LENGTH=466	4-hydroxy-3-methylbut-2-enyl diphosphate reductase OS=Streptomyces coelicolor (strain ATCC BAA-471 / A3(2) / M145) GN=ispH PE=3 SV=2	MVA and MEP pathways
Pg_S0034.2	Beta-amyrin synthase [β-AS]	AT1G78955	N0BQ25	| Symbols: CAMS1 | camelliol C synthase 1 | chr1:29689153-29694255 REVERSE LENGTH=769	beta-amyrin synthase [Panax quinquefolius]	Forming oleanane-types
Pg_S0910.3	Cycloartenol Synthase [CAS]	AT2G07050.1	N0BJF5	AT2G07050.1 | Symbols: CAS1 | cycloartenol synthase 1 | chr2:2924629-2930295 FORWARD LENGTH=759	cycloartenol synthase [Panax quinquefolius]	Forming sterols
Pg_S4493.1	UDP Glycosyltransferase [UGT1]	AT4G01070.1	A0A068J840	AT4G01070.1 | Symbols: GT72B1, UGT72B1 | UDP-Glycosyltransferase superfamily protein | chr4:461858-463300 REVERSE LENGTH=480	UDP-glycosyltransferase 1 (Panax ginseng (Korean ginseng))	UGT glycosyltransferases
Pg_S4157.4	UDP Glycosyltransferase [UGT101]	AT4G01070.1	A0A0K0PVM5	AT4G01070.1 | Symbols: GT72B1, UGT72B1 | UDP-Glycosyltransferase superfamily protein | chr4:461858-463300 REVERSE LENGTH=480	UDP-glycosyltransferase 101 (Panax ginseng (Korean ginseng))	UGT glycosyltransferases
Pg_S2289.21	UDP glucosyltransferase [94B1, UGT29, UGT94Q2]	AT4G01070.1	A0A0A6ZFY4	AT4G01070.1 | Symbols: GT72B1, UGT72B1 | UDP-Glycosyltransferase superfamily protein | chr4:461858-463300 REVERSE LENGTH=480	UDP-glucosyltransferase 29 (Panax ginseng (Korean ginseng))	UGT glycosyltransferases
Pg_S6708.3	UDP glucosyltransferase [94B1, UGT29, UGT94Q2]	AT4G01070.1	A0A0A6ZFY4	AT4G01070.1 | Symbols: GT72B1, UGT72B1 | UDP-Glycosyltransferase superfamily protein | chr4:461858-463300 REVERSE LENGTH=480	UDP-glucosyltransferase 29 (Panax ginseng (Korean ginseng))	UGT glycosyltransferases
Pg_S4174.7	UDP Glycosyltransferase [UGT74A1, UGT74AE2]	AT4G01070.1	A0A0A6ZFR4	AT4G01070.1 | Symbols: GT72B1, UGT72B1 | UDP-Glycosyltransferase superfamily protein | chr4:461858-463300 REVERSE LENGTH=480	UDP-glucosyltransferase 74AE2 (Panax ginseng (Korean ginseng)	UGT glycosyltransferases
Pg_S5977.4	UDP Glycosyltransferase [UGT45]	AT4G01070.1	A0A0D5ZDC8	AT4G01070.1 | Symbols: GT72B1, UGT72B1 | UDP-Glycosyltransferase superfamily protein | chr4:461858-463300 REVERSE LENGTH=480	UDP-glucosyltransferase 45 (Panax ginseng (Korean ginseng))	UGT glycosyltransferases
Pg_S6256.3	UDP Glycosyltransferase [UGT71A27]	AT4G01070.1	A0A0A7HB61	AT4G01070.1 | Symbols: GT72B1, UGT72B1 | UDP-Glycosyltransferase superfamily protein | chr4:461858-463300 REVERSE LENGTH=480	UDP-glycosyltransferase 71A27 (Panax ginseng (Korean ginseng))	UGT glycosyltransferases
Pg_S2382.3	UDP Glycosyltransferase 4 [UGT4]	AT4G01070.1	A0A0A7H8H0	AT4G01070.1 | Symbols: GT72B1, UGT72B1 | UDP-Glycosyltransferase superfamily protein | chr4:461858-463300 REVERSE LENGTH=480	UDP-glycosyltransferase GUT4 (Panax ginseng (Korean ginseng))	UGT glycosyltransferases
Pg_S2229.7	UDP Glycosyltransferase [UGT14]	AT5G17050	A0A068J5R0	| Symbols: UGT78D2 | UDP-glucosyl transferase 78D2 | chr5:5607828-5609392 REVERSE LENGTH=460	Glycosyltransferase UGT14 (Panax ginseng (Korean ginseng))	UGT glycosyltransferases
Pg_S4251.14	UDP glucose:sterol 3-O-glucosyltransferase [PGGT-2]	AT4G01070.1	Q8H9B4	| Symbols: | UDP-Glycosyltransferase superfamily protein | chr3:2218120-2221590 REVERSE LENGTH=637	UDP-glucose:sterol 3-O-glucosyltransferase (Panax ginseng (Korean ginseng))	UGT glycosyltransferases
Pg_S0684.30	UDP Glycosyltransferase 8 [UGT8]	AT1G05680.1	A0A068JAV3	AT1G05680.1 | Symbols: UGT74E2 | Uridine diphosphate glycosyltransferase 74E2 | chr1:1703196-1704639 REVERSE LENGTH=453	UDP Glycosyltransferase 8 (Panax ginseng (Korean ginseng))	UGT glycosyltransferases
Pg_S4691.7	UDP Glycosyltransferase [UGT10]	AT4G01070.1	A0A068J4Z6	AT4G01070.1 | Symbols: GT72B1, UGT72B1 | UDP-Glycosyltransferase superfamily protein | chr4:461858-463300 REVERSE LENGTH=480	UDP Glycosyltransferase UGT10 (Panax ginseng (Korean ginseng))	UGT glycosyltransferases
Pg_S1410.4	UDP Glycosyltransferase [UGT2]	AT3G50740.1	A0A068J506	AT3G50740.1 | Symbols: UGT72E1 | UDP-glucosyl transferase 72E1 | chr3:18855348-18856811 REVERSE LENGTH=487	UDP Glycosyltransferase UGT2 (Panax ginseng (Korean ginseng))	UGT glycosyltransferases
Pg_S1937.1	UDP Glycosyltransferase [UGT3]	AT4G01070.1	A0A068J4Z9	| Symbols: | UDP-Glycosyltransferase superfamily protein | chr5:20189968-20191350 REVERSE LENGTH=460	UDP Glycosyltransferase UGT3 (Panax ginseng (Korean ginseng))	UGT glycosyltransferases
Pg_S1806.19	UDP Glycosyltransferase [UGT13]	AT4G01070.1	A0A068J502	| Symbols: | UDP-Glycosyltransferase superfamily protein | chr3:3556728-3558149 FORWARD LENGTH=447	UDP Glycosyltransferase UGT13 (Panax ginseng (Korean ginseng))	UGT glycosyltransferases
Pg_S3920.12	UDP Glycosyltransferase [unreviewed]	AT4G01070.1	P34317	AT4G01070.1 | Symbols: GT72B1, UGT72B1 | UDP-Glycosyltransferase superfamily protein | chr4:461858-463300 REVERSE LENGTH=480	Putative UDP-glucuronosyltransferase ugt-60 OS=Caenorhabditis elegans GN=ugt-60 PE=3 SV=2	UGT glycosyltransferases
Pg_S4782.4	UDP Glycosyltransferase [unreviewed]	AT1G22340.1	Q9HAW8	AT1G22340.1 | Symbols: AtUGT85A7, UGT85A7 | UDP-glucosyl transferase 85A7 | chr1:7890464-7892090 REVERSE LENGTH=487	UDP-glucuronosyltransferase 1-10 OS=Homo sapiens GN=UGT1A10 PE=1 SV=1	UGT glycosyltransferases
Pg_S8923.1	UDP Glycosyltransferase [unreviewed]	AT4G01070.1	P34317	AT4G01070.1 | Symbols: GT72B1, UGT72B1 | UDP-Glycosyltransferase superfamily protein | chr4:461858-463300 REVERSE LENGTH=480	Putative UDP-glucuronosyltransferase ugt-60 OS=Caenorhabditis elegans GN=ugt-60 PE=3 SV=2	UGT glycosyltransferases
Pg_S0804.16	UDP Glycosyltransferase [unreviewed]	AT4G01070.1	P34317	AT4G01070.1 | Symbols: GT72B1, UGT72B1 | UDP-Glycosyltransferase superfamily protein | chr4:461858-463300 REVERSE LENGTH=480	Putative UDP-glucuronosyltransferase ugt-60 OS=Caenorhabditis elegans GN=ugt-60 PE=3 SV=2	UGT glycosyltransferases
Pg_S1468.16	UDP Glycosyltransferase [unreviewed]	AT2G23260.1	Q83140	AT2G23260.1 | Symbols: UGT84B1 | UDP-glucosyl transferase 84B1 | chr2:9900046-9901416 REVERSE LENGTH=456	Ecdysteroid UDP-glucosyltransferase OS=Mamestra brassicae nuclear polyhedrosis virus GN=EGT PE=3 SV=1	UGT glycosyltransferases
Pg_S2693.15	UDP Glycosyltransferase [unreviewed]	AT4G01070.1	P34317	AT4G01070.1 | Symbols: GT72B1, UGT72B1 | UDP-Glycosyltransferase superfamily protein | chr4:461858-463300 REVERSE LENGTH=480	Putative UDP-glucuronosyltransferase ugt-60 OS=Caenorhabditis elegans GN=ugt-60 PE=3 SV=2	UGT glycosyltransferases
Pg_S5521.1	UDP Glycosyltransferase [unreviewed]	AT4G01070.1	P34317	AT4G01070.1 | Symbols: GT72B1, UGT72B1 | UDP-Glycosyltransferase superfamily protein | chr4:461858-463300 REVERSE LENGTH=480	Putative UDP-glucuronosyltransferase ugt-60 OS=Caenorhabditis elegans GN=ugt-60 PE=3 SV=2	UGT glycosyltransferases
Pg_S5890.3	UDP Glycosyltransferase [unreviewed]	AT2G34480.1	Q8WQI7	AT2G34480.1 | Symbols: | Ribosomal protein L18ae/LX family protein | chr2:14532916-14534161 REVERSE LENGTH=178	60S ribosomal protein L18a OS=Spodoptera frugiperda GN=RpL18A PE=2 SV=1	UGT glycosyltransferases
Pg_S1106.49	UDP Glycosyltransferase [unreviewed]	AT4G34131.1	O75310	AT4G34131.1 | Symbols: UGT73B3 | UDP-glucosyl transferase 73B3 | chr4:16343268-16344713 REVERSE LENGTH=481	UDP-glucuronosyltransferase 2B11 OS=Homo sapiens GN=UGT2B11 PE=2 SV=1	UGT glycosyltransferases
Pg_S2365.2	UDP Glycosyltransferase [unreviewed]	AT4G01070.1	P34317	AT4G01070.1 | Symbols: GT72B1, UGT72B1 | UDP-Glycosyltransferase superfamily protein | chr4:461858-463300 REVERSE LENGTH=480	Putative UDP-glucuronosyltransferase ugt-60 OS=Caenorhabditis elegans GN=ugt-60 PE=3 SV=2	UGT glycosyltransferases
Pg_S5385.1	UDP Glycosyltransferase [unreviewed]	AT1G22380.1	Q6WFW1	AT1G22380.1 | Symbols: AtUGT85A3, UGT85A3 | UDP-glucosyl transferase 85A3 | chr1:7900522-7902332 REVERSE LENGTH=488	Crocetin glucosyltransferase 3 OS=Crocus sativus GN=GLT3 PE=1 SV=1	UGT glycosyltransferases
Pg_S3998.14	UDP Glycosyltransferase [unreviewed]	AT4G01070.1	P34317	AT4G01070.1 | Symbols: GT72B1, UGT72B1 | UDP-Glycosyltransferase superfamily protein | chr4:461858-463300 REVERSE LENGTH=480	Putative UDP-glucuronosyltransferase ugt-60 OS=Caenorhabditis elegans GN=ugt-60 PE=3 SV=2	UGT glycosyltransferases
Pg_S4769.12	UDP Glycosyltransferase [unreviewed]	AT5G03340.1	B9S0I3	AT5G03340.1 | Symbols: | ATPase, AAA-type, CDC48 protein | chr5:810091-813133 REVERSE LENGTH=810	Transitional endoplasmic reticulum ATPase, putative	UGT glycosyltransferases
Pg_S1770.12	Protopanaxadiol 6-hydroxylase CYP716A53v2 (PPTS)	AT5G36110.1	I7CT85	| Symbols: CYP716A1 | cytochrome P450, family 716, subfamily A, polypeptide 1 | chr5:14195377-14197613 FORWARD LENGTH=477	C7A53_PANGI RecName: Full=Protopanaxadiol 6-hydroxylase; Short=P6H; AltName: Full=Cytochrome P450 CYP716A53v2; AltName: Full=Protopanaxatriol synthase [Panax ginseng]	CYP450
Pg_S6850.1	Cytochrome P450 CYP72A219	AT3G14690.1	H2DH21	| Symbols: CYP72A15 | cytochrome P450, family 72, subfamily A, polypeptide 15 | chr3:4937410-4939310 FORWARD LENGTH=512	C7A29_PANGI RecName: Full=Cytochrome P450 CYP72A219; AltName: Full=Cytochrome P450 CYP72A129 [Panax ginseng]	CYP450
Pg_S6876.1	Cytochrome P450, family 81, subfamily D, polypeptide 8	AT4G37370.1	F4YF78	AT4G37370.1 | Symbols: CYP81D8 | cytochrome P450, family 81, subfamily D, polypeptide 8 | chr4:17569971-17571678 REVERSE LENGTH=497	cytochrome P450 [Panax notoginseng]	CYP450
Pg_S1952.5	Cytochrome P450, family 72, subfamily A, polypeptide 14	AT3G14680.1	Q9LUC6	AT3G14680.1 | Symbols: CYP72A14 | cytochrome P450, family 72, subfamily A, polypeptide 14 | chr3:4934478-4936462 FORWARD LENGTH=512	Cytochrome P450 72A14 OS=Arabidopsis thaliana GN=CYP72A14 PE=2 SV=1	CYP450
Pg_S6850.3	Cytochrome P450, family 72, subfamily A, polypeptide 15	AT3G14690.1	Q6WKZ0	AT3G14690.1 | Symbols: CYP72A15 | cytochrome P450, family 72, subfamily A, polypeptide 15 | chr3:4937410-4939310 FORWARD LENGTH=512	Cytochrome P450 71D94 OS=Mentha gracilis GN=CYP71D94 PE=2 SV=1	CYP450
Pg_S5342.1	Cytochrome P450, allene oxide synthase	AT5G42650.1	Q9V776	AT5G42650.1 | Symbols: AOS, CYP74A, DDE2 | allene oxide synthase | chr5:17097803-17099359 REVERSE LENGTH=518	Probable cytochrome P450 317a1 OS=Drosophila melanogaster GN=Cyp317a1 PE=3 SV=2	CYP450
Pg_S1647.32	Cytochrome P450, E-class, group IV	AT5G07990.1	O42430	AT5G07990.1 | Symbols: TT7, CYP75B1, D501 | Cytochrome P450 superfamily protein | chr5:2560437-2562859 FORWARD LENGTH=513	Cytochrome P450 1A1 OS=Limanda limanda GN=cyp1a1 PE=2 SV=1	CYP450
Pg_S1171.21	Cytochrome P450, family 97, subfamily B, polypeptide 3	AT4G15110.1	Q7KWN2	AT4G15110.1 | Symbols: CYP97B3 | cytochrome P450, family 97, subfamily B, polypeptide 3 | chr4:8629922-8632993 REVERSE LENGTH=580	Probable cytochrome P450 525A1 OS=Dictyostelium discoideum GN=cyp525A1 PE=3 SV=1	CYP450
Pg_S1355.1	Cytochrome P450, E-class, group IV	AT1G11910.1	Q5A651	AT1G11910.1 | Symbols: APA1, ATAPA1 | aspartic proteinase A1 | chr1:4017119-4019874 REVERSE LENGTH=506	Candidapepsin-10 OS=Candida albicans (strain SC5314 / ATCC MYA-2876) GN=SAP10 PE=1 SV=1	CYP450
Pg_S1964.1	Cytochrome P450, family 82, subfamily C, polypeptide 4	AT4G31940.1	P56592	AT4G31940.1 | Symbols: CYP82C4 | cytochrome P450, family 82, subfamily C, polypeptide 4 | chr4:15452040-15453966 FORWARD LENGTH=524	Cytochrome P450 1A2 OS=Canis familiaris GN=CYP1A2 PE=1 SV=2	CYP450
Pg_S1237.36	Cytochrome P450, family 71, subfamily B, polypeptide 13	AT5G25140.1	Q9GMC7	AT5G25140.1 | Symbols: CYP71B13 | cytochrome P450, family 71, subfamily B, polypeptide 13 | chr5:8672989-8674557 FORWARD LENGTH=496	Steroid 17-alpha-hydroxylase/17,20 lyase OS=Bison bison GN=CYP17A1 PE=2 SV=1	CYP450
Pg_S5861.1	Cytochrome P450, family 71, subfamily A, polypeptide 25	AT3G48280.1	Q06367	AT3G48280.1 | Symbols: CYP71A25 | cytochrome P450, family 71, subfamily A, polypeptide 25 | chr3:17879594-17881164 FORWARD LENGTH=490	Cytochrome P450 1A1 OS=Cavia porcellus GN=CYP1A1 PE=1 SV=1	CYP450
Pg_S1972.1	Cytochrome P450, family 71, subfamily B, polypeptide 13	AT5G25140.1	Q9GMC7	AT5G25140.1 | Symbols: CYP71B13 | cytochrome P450, family 71, subfamily B, polypeptide 13 | chr5:8672989-8674557 FORWARD LENGTH=496	Steroid 17-alpha-hydroxylase/17,20 lyase OS=Bison bison GN=CYP17A1 PE=2 SV=1	CYP450
Pg_S2898.9	Cytochrome P450, family 82, subfamily C, polypeptide 4	AT4G31940.1	P56592	AT4G31940.1 | Symbols: CYP82C4 | cytochrome P450, family 82, subfamily C, polypeptide 4 | chr4:15452040-15453966 FORWARD LENGTH=524	Cytochrome P450 1A2 OS=Canis familiaris GN=CYP1A2 PE=1 SV=2	CYP450
Pg_S5728.1	Cytochrome P450, allene oxide synthase	AT5G42650.1	Q9V776	AT5G42650.1 | Symbols: AOS, CYP74A, DDE2 | allene oxide synthase | chr5:17097803-17099359 REVERSE LENGTH=518	Probable cytochrome P450 317a1 OS=Drosophila melanogaster GN=Cyp317a1 PE=3 SV=2	CYP450
Pg_S1237.20	Cytochrome P450 CYP736A12	AT5G07990.1	O42430	AT5G07990.1 | Symbols: TT7, CYP75B1, D501 | Cytochrome P450 superfamily protein | chr5:2560437-2562859 FORWARD LENGTH=513	Cytochrome P450 1A1 OS=Limanda limanda GN=cyp1a1 PE=2 SV=1	CYP450
Pg_S6822.2	Cytochrome P450, family 71, subfamily A, polypeptide 25	AT3G48280.1	Q06367	AT3G48280.1 | Symbols: CYP71A25 | cytochrome P450, family 71, subfamily A, polypeptide 25 | chr3:17879594-17881164 FORWARD LENGTH=490	Cytochrome P450 1A1 OS=Cavia porcellus GN=CYP1A1 PE=1 SV=1	CYP450
Pg_S6691.3	Cytochrome P450, family 81, subfamily D, polypeptide 8	AT4G37370.1	P05180	AT4G37370.1 | Symbols: CYP81D8 | cytochrome P450, family 81, subfamily D, polypeptide 8 | chr4:17569971-17571678 REVERSE LENGTH=497	Cytochrome P450 2H1 OS=Gallus gallus GN=CYP2H1 PE=2 SV=1	CYP450
Pg_S1090.2	Cytochrome P450, family 98, subfamily A, polypeptide 3	AT2G40890.1	B5UAQ8	AT2G40890.1 | Symbols: CYP98A3 | cytochrome P450, family 98, subfamily A, polypeptide 3 | chr2:17058291-17060532 REVERSE LENGTH=508	Cheilanthifoline synthase OS=Eschscholzia californica GN=CYP719A5 PE=1 SV=1	CYP450
Pg_S5490.1	Cytochrome P450, family 76, subfamily C, polypeptide 2	AT2G45570.1	Q9SWR5	AT2G45570.1 | Symbols: CYP76C2 | cytochrome P450, family 76, subfamily C, polypeptide 2 | chr2:18779935-18781922 REVERSE LENGTH=512	2-hydroxyisoflavanone synthase OS=Glycine max GN=IFS2 PE=2 SV=1	CYP450
Pg_S9409.1	Cytochrome P450, family 77, subfamily A, polypeptide 4	AT5G04660.1	P05177	AT5G04660.1 | Symbols: CYP77A4 | cytochrome P450, family 77, subfamily A, polypeptide 4 | chr5:1336049-1337587 FORWARD LENGTH=512	Cytochrome P450 1A2 OS=Homo sapiens GN=CYP1A2 PE=1 SV=3	CYP450
Pg_S4060.1	Cytochrome P450, cinnamate-4-hydroxylase	AT2G30490.1	H2DH19	AT2G30490.1 | Symbols: ATC4H, C4H, CYP73A5, REF3 | cinnamate-4-hydroxylase | chr2:12993861-12995683 REVERSE LENGTH=505	Cytochrome P450 CYP71D312 OS=Panax ginseng PE=2 SV=1	CYP450

## Sheet: Specific proteins
Table 2. List of proteins specific to fruit, leaf, root, shoot tissues
Ginseng ID	Protein name	[TAIR10]	[Uniprot] ID	[TAIR10] Description	[UniProt] Description	Tissue
Pg_S4782.4	UDP Glycosyltransferase [unreviewed]	AT1G22340.1	Q9HAW8	AT1G22340.1 | Symbols: AtUGT85A7, UGT85A7 | UDP-glucosyl transferase 85A7 | chr1:7890464-7892090 REVERSE LENGTH=487	UDP-glucuronosyltransferase 1-10 OS=Homo sapiens GN=UGT1A10 PE=1 SV=1	Fruit
Pg_S8923.1	UDP Glycosyltransferase [unreviewed]	AT4G01070.1	P34317	AT4G01070.1 | Symbols: GT72B1, UGT72B1 | UDP-Glycosyltransferase superfamily protein | chr4:461858-463300 REVERSE LENGTH=480	Putative UDP-glucuronosyltransferase ugt-60 OS=Caenorhabditis elegans GN=ugt-60 PE=3 SV=2	Fruit
Pg_S1908.21	1-deoxy-D-xylulose-5-phosphate synthase [DXS]	AT4G15560.1	Q8Z8X3	AT4G15560.1 | Symbols: CLA1, DEF, CLA, DXS, DXPS2 | Deoxyxylulose-5-phosphate synthase | chr4:8884218-8887254 FORWARD LENGTH=717	1-deoxy-D-xylulose-5-phosphate synthase OS=Salmonella typhi GN=dxs PE=3 SV=3	Leaf
Pg_S4604.8	4-hydroxy-3-methylbut-2-enyl diphosphate reductase [ispH]	AT4G34350.1	Q9FBM1	AT4G34350.1 | Symbols: CLB6, ISPH, HDR | 4-hydroxy-3-methylbut-2-enyl diphosphate reductase | chr4:16428681-16431038 REVERSE LENGTH=466	4-hydroxy-3-methylbut-2-enyl diphosphate reductase OS=Streptomyces coelicolor (strain ATCC BAA-471 / A3(2) / M145) GN=ispH PE=3 SV=2	Leaf
Pg_S1468.16	UDP Glycosyltransferase [unreviewed]	AT2G23260.1	Q83140	AT2G23260.1 | Symbols: UGT84B1 | UDP-glucosyl transferase 84B1 | chr2:9900046-9901416 REVERSE LENGTH=456	Ecdysteroid UDP-glucosyltransferase OS=Mamestra brassicae nuclear polyhedrosis virus GN=EGT PE=3 SV=1	Leaf
Pg_S1937.1	UDP Glycosyltransferase [UGT3]	AT4G01070.1	A0A068J4Z9	AT4G01070.1 | Symbols: | UDP-Glycosyltransferase superfamily protein | chr5:20189968-20191350 REVERSE LENGTH=460	UDP Glycosyltransferase UGT3 (Panax ginseng (Korean ginseng))	Root
Pg_S1806.19	UDP Glycosyltransferase [UGT13]	AT4G01070.1	A0A068J502	AT4G01070.1 | Symbols: | UDP-Glycosyltransferase superfamily protein | chr3:3556728-3558149 FORWARD LENGTH=447	UDP Glycosyltransferase UGT13 (Panax ginseng (Korean ginseng))	Root
Pg_S1106.49	UDP Glycosyltransferase [unreviewed]	AT4G34131.1	O75310	AT4G34131.1 | Symbols: UGT73B3 | UDP-glucosyl transferase 73B3 | chr4:16343268-16344713 REVERSE LENGTH=481	UDP-glucuronosyltransferase 2B11 OS=Homo sapiens GN=UGT2B11 PE=2 SV=1	Root
Pg_S2365.2	UDP Glycosyltransferase [unreviewed]	AT4G01070.1	P34317	AT4G01070.1 | Symbols: GT72B1, UGT72B1 | UDP-Glycosyltransferase superfamily protein | chr4:461858-463300 REVERSE LENGTH=480	Putative UDP-glucuronosyltransferase ugt-60 OS=Caenorhabditis elegans GN=ugt-60 PE=3 SV=2	Root
Pg_S1972.1	Cytochrome P450, family 71, subfamily B, polypeptide 13	AT5G25140.1	Q9GMC7	AT5G25140.1 | Symbols: CYP71B13 | cytochrome P450, family 71, subfamily B, polypeptide 13 | chr5:8672989-8674557 FORWARD LENGTH=496	Steroid 17-alpha-hydroxylase/17,20 lyase OS=Bison bison GN=CYP17A1 PE=2 SV=1	Root
Pg_S1237.36	Cytochrome P450, family 71, subfamily B, polypeptide 13	AT5G25140.1	Q9GMC7	AT5G25140.1 | Symbols: CYP71B13 | cytochrome P450, family 71, subfamily B, polypeptide 13 | chr5:8672989-8674557 FORWARD LENGTH=496	Steroid 17-alpha-hydroxylase/17,20 lyase OS=Bison bison GN=CYP17A1 PE=2 SV=1	Root
Pg_S6822.2	Cytochrome P450, family 71, subfamily A, polypeptide 25	AT3G48280.1	Q06367	AT3G48280.1 | Symbols: CYP71A25 | cytochrome P450, family 71, subfamily A, polypeptide 25 | chr3:17879594-17881164 FORWARD LENGTH=490	Cytochrome P450 1A1 OS=Cavia porcellus GN=CYP1A1 PE=1 SV=1	Shoot
